# Supplementary material
Source: publisher figshare collection journal article supplement (https://tandf.figshare.com/articles/dataset/_/7936865)
Supplement: Supplementary file 1 [file 1]

Archive with 22 entries (22 files):
- temi_a_12040023_sm0001.pdf
- temi_a_12040023_sm0002.pdf
- temi_a_12040023_sm0003.pdf
- temi_a_12040023_sm0004.pdf
- temi_a_12040023_sm0005.pdf
- temi_a_12040023_sm0006.pdf
- temi_a_12040023_sm0007.pdf
- temi_a_12040023_sm0008.xlsx
- temi_a_12040023_sm0009.xlsx
- temi_a_12040023_sm0010.xlsx
- temi_a_12040023_sm0011.xlsx
- temi_a_12040023_sm0012.xlsx
- temi_a_12040023_sm0013.xlsx
- temi_a_12040023_sm0014.xlsx
- temi_a_12040023_sm0015.xlsx
- temi_a_12040023_sm0016.xlsx
- temi_a_12040023_sm0017.xlsx
- temi_a_12040023_sm0018.xlsx
- temi_a_12040023_sm0019.xlsx
- temi_a_12040023_sm0020.xlsx
- temi_a_12040023_sm0021.xlsx
- temi_a_12040023_sm0022.xlsx
