# Supplementary material
Source: publisher figshare collection journal article supplement (https://tandf.figshare.com/articles/dataset/_/7936865)
Supplement: Supplementary file 1 [file 1 › temi_a_12040023_sm0002.pdf]

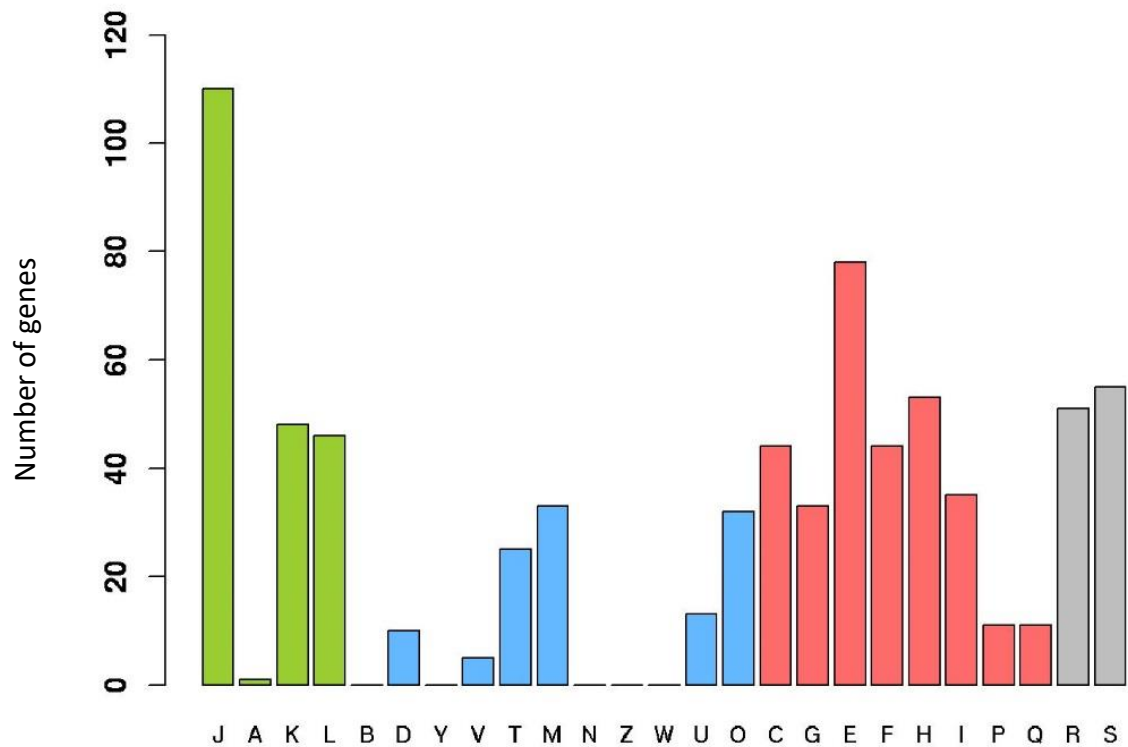

**Supplementary Figure S2.** Functional categories of single copy ortholog genes used to build the phylogenetic tree (See Figure 1B for meanings of different colors and capital letter and Supplementary Table S8).
