# Supplementary material
Source: publisher figshare collection journal article supplement (https://tandf.figshare.com/articles/dataset/_/7936865)
Supplement: Supplementary file 1 [file 1 › temi_a_12040023_sm0003.pdf]

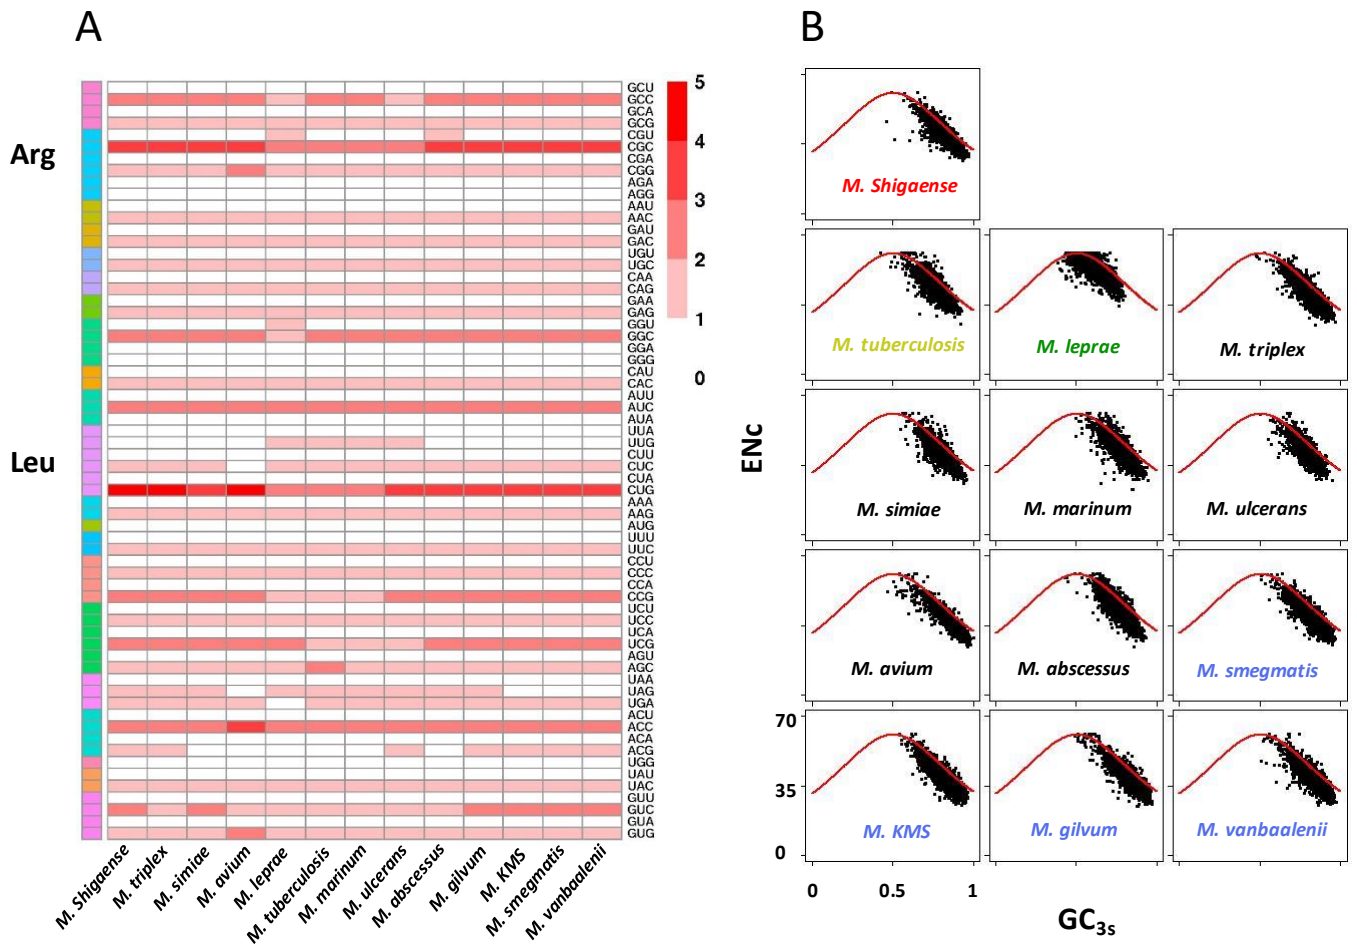

**Supplementary Figure S3. Analysis of codon usage bias (CUB) for the 13 strains.** (A) The RSCU analysis of preferred codons for each of 20 amino acids. (B) The ENc-plot. The standard curve (red color)  $ENc = 2 + GC_{3s} + 29/[GC_{3s}^2 + (1 - GC_{3s})^2]$  represents the expected ENc to  $GC_{3s}$ . ENc represents the effective number of codons, and  $GC_{3s}$  for the third synonymous codon position GC content. If genes follow the standard curve, CUB is determined primarily by the nucleotide composition of genes.
