# Supplementary material
Source: publisher figshare collection journal article supplement (https://tandf.figshare.com/articles/dataset/_/7936865)
Supplement: Supplementary file 1 [file 1 › temi_a_12040023_sm0004.pdf]

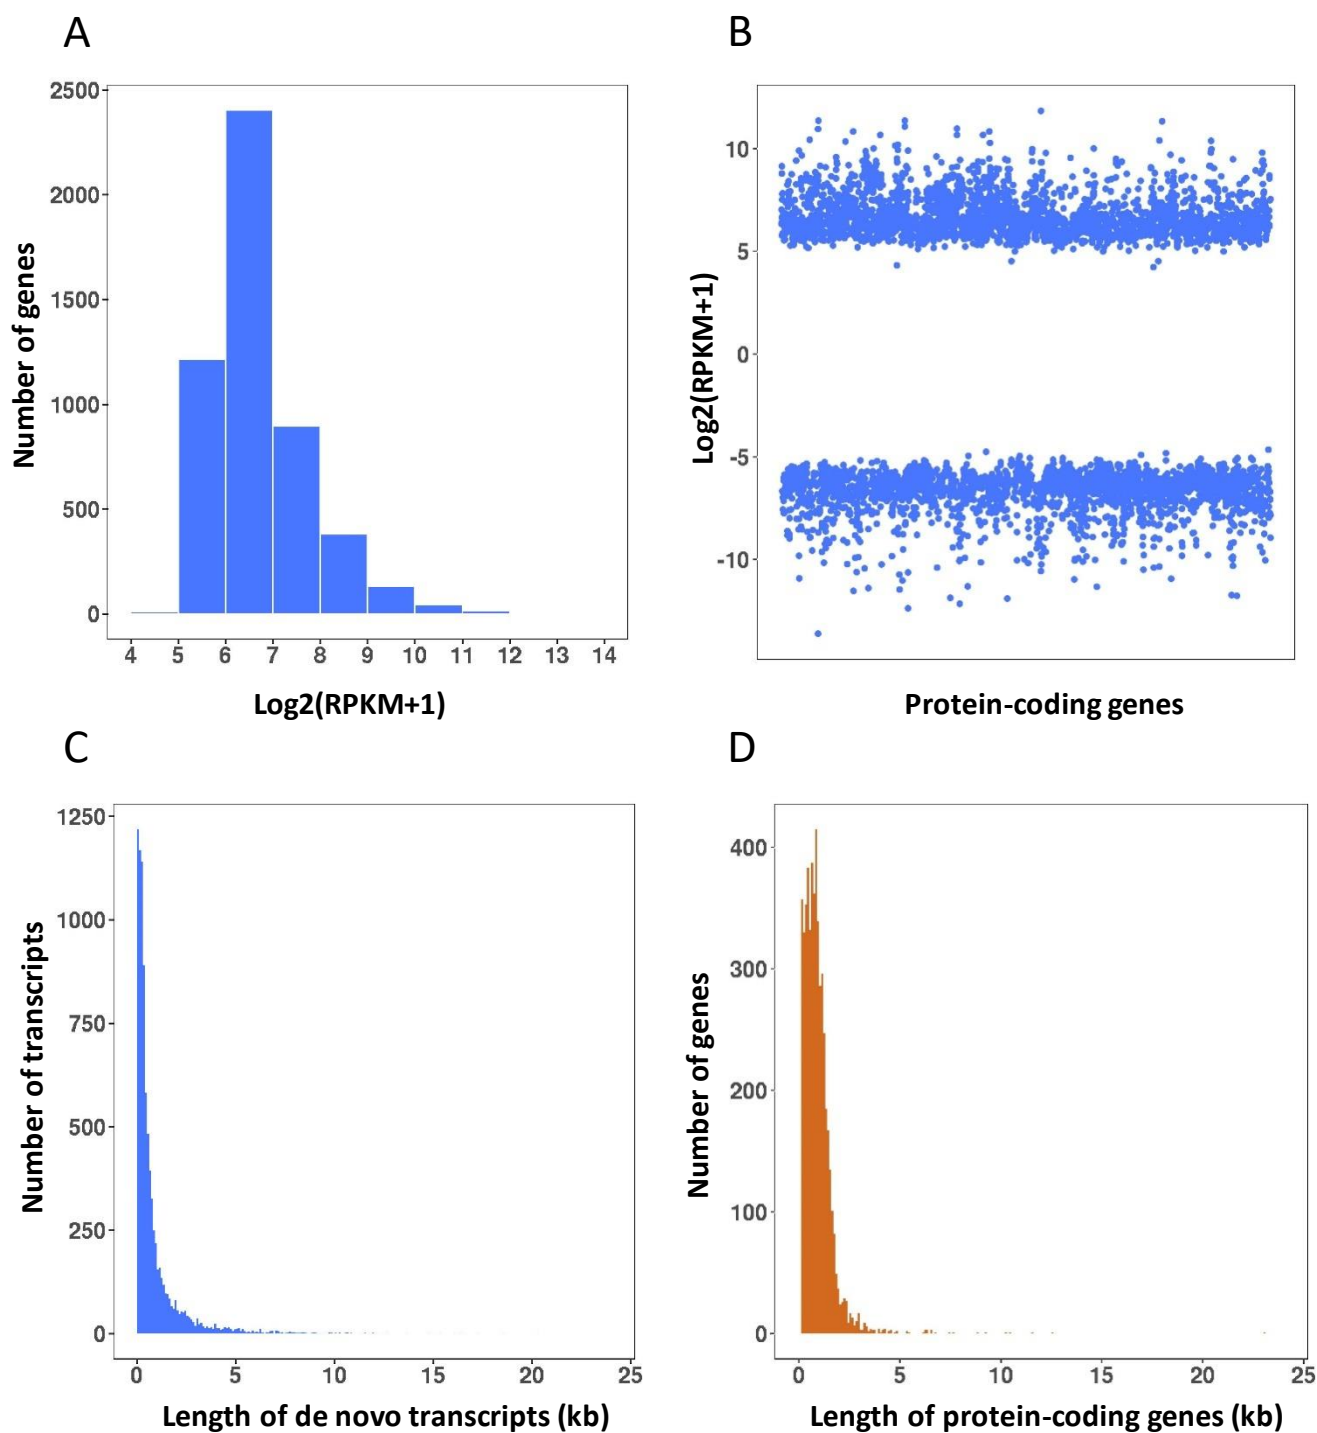

**Supplementary Figure S4. Informations of *M. shigaense* protein-coding genes.** (A) Expression distribution of *M. shigaense* protein-coding genes. (B) Expression values of *M. shigaense* protein-coding genes. Plus values are for plus-strand genes, and minus values for minus-strand genes. (C,D) Length distribution of de novo transcripts and protein-coding genes of *M. shigaense*.
