# Supplementary material
Source: publisher figshare collection journal article supplement (https://tandf.figshare.com/articles/dataset/_/7936865)
Supplement: Supplementary file 1 [file 1 › temi_a_12040023_sm0005.pdf]

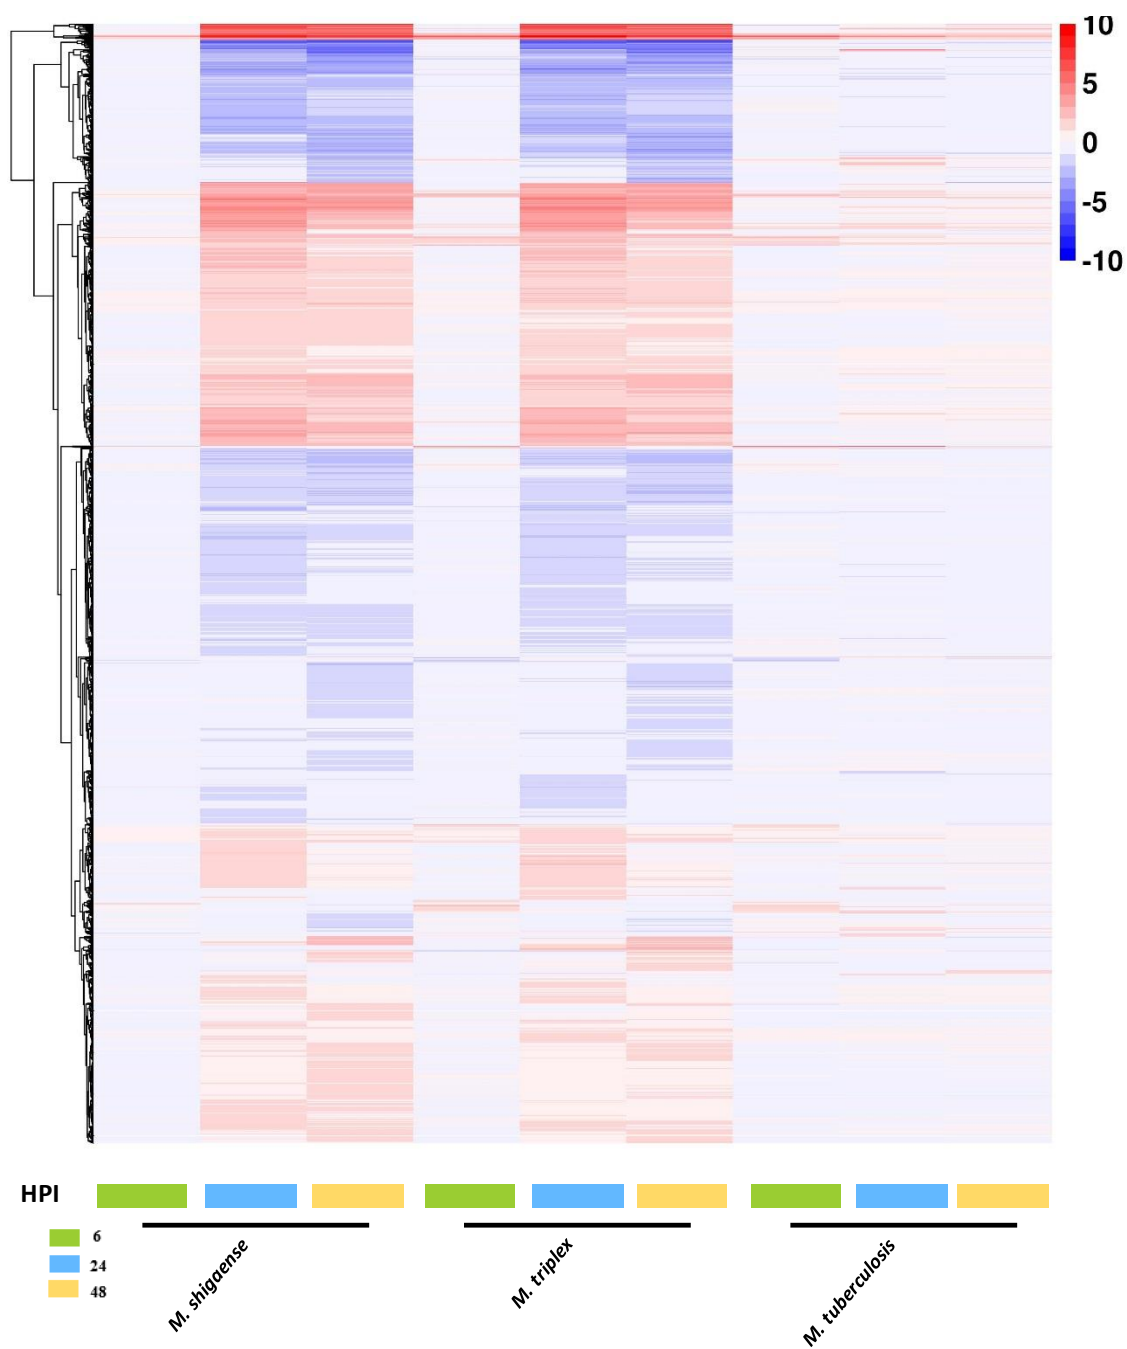

**Supplementary Figure S5.** Gene expression signature of all of DEGs (Absolute value of log2FC  $\geq 1$  and FDR  $\leq 0.01$ ) from each time point for *M. shigaense*, *M. triplex* and *M. tuberculosis*. The colors denote log2FC of genes expression. HPI has the same meanings with Figure 5.
