# Supplementary material
Source: publisher figshare collection journal article supplement (https://tandf.figshare.com/articles/dataset/_/7936865)
Supplement: Supplementary file 1 [file 1 › temi_a_12040023_sm0006.pdf]

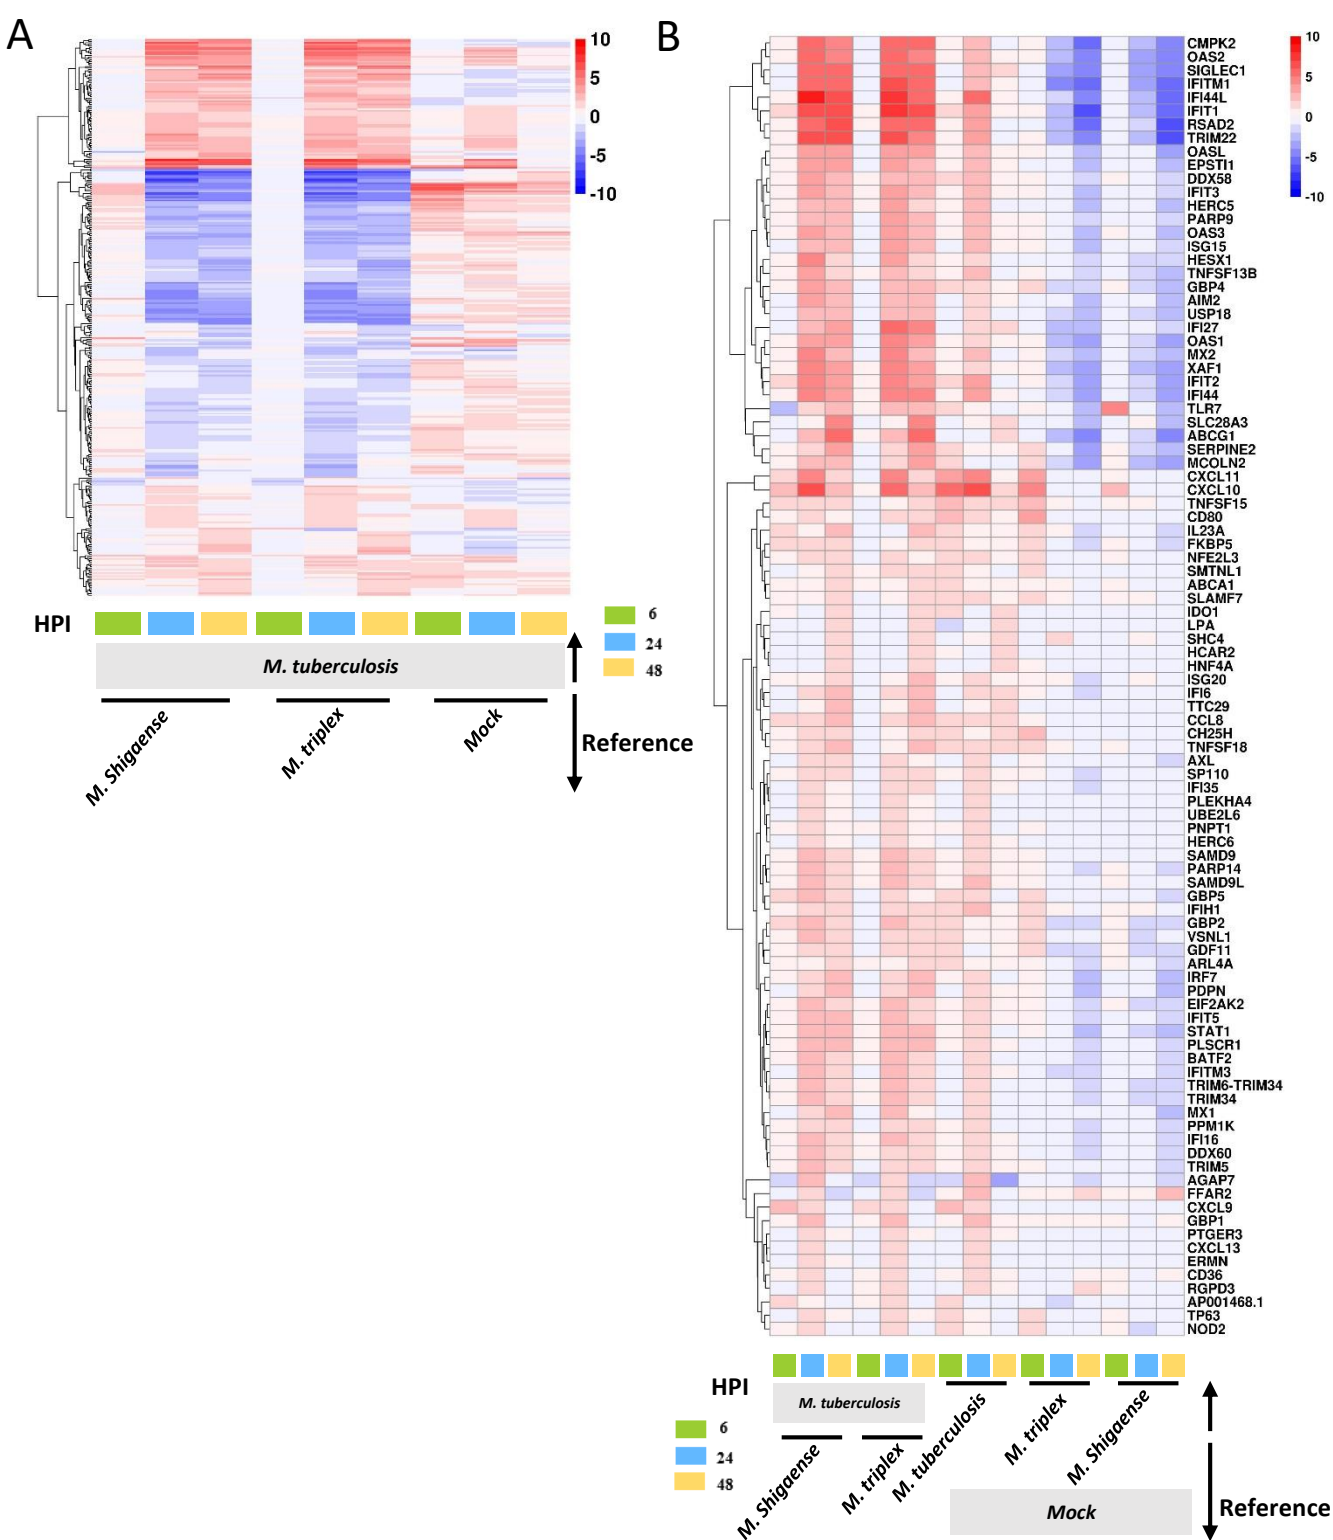

**Supplementary Figure S6. Gene expression signature of *M. tuberculosis*- specific genes.** (A) For all of *M. tuberculosis*- specific genes. (B) Part for up-regulated *M. tuberculosis*- specific genes, another Part for these genes of *M. tuberculosis*, *M. shigaense* and *M. triplex* compared with mock group. The colors denote log<sub>2</sub>FC of genes expression. HPI has the same meanings with Figure 5.
