# Supplementary material
Source: publisher figshare collection journal article supplement (https://tandf.figshare.com/articles/dataset/_/7936865)
Supplement: Supplementary file 1 [file 1 › temi_a_12040023_sm0007.pdf]

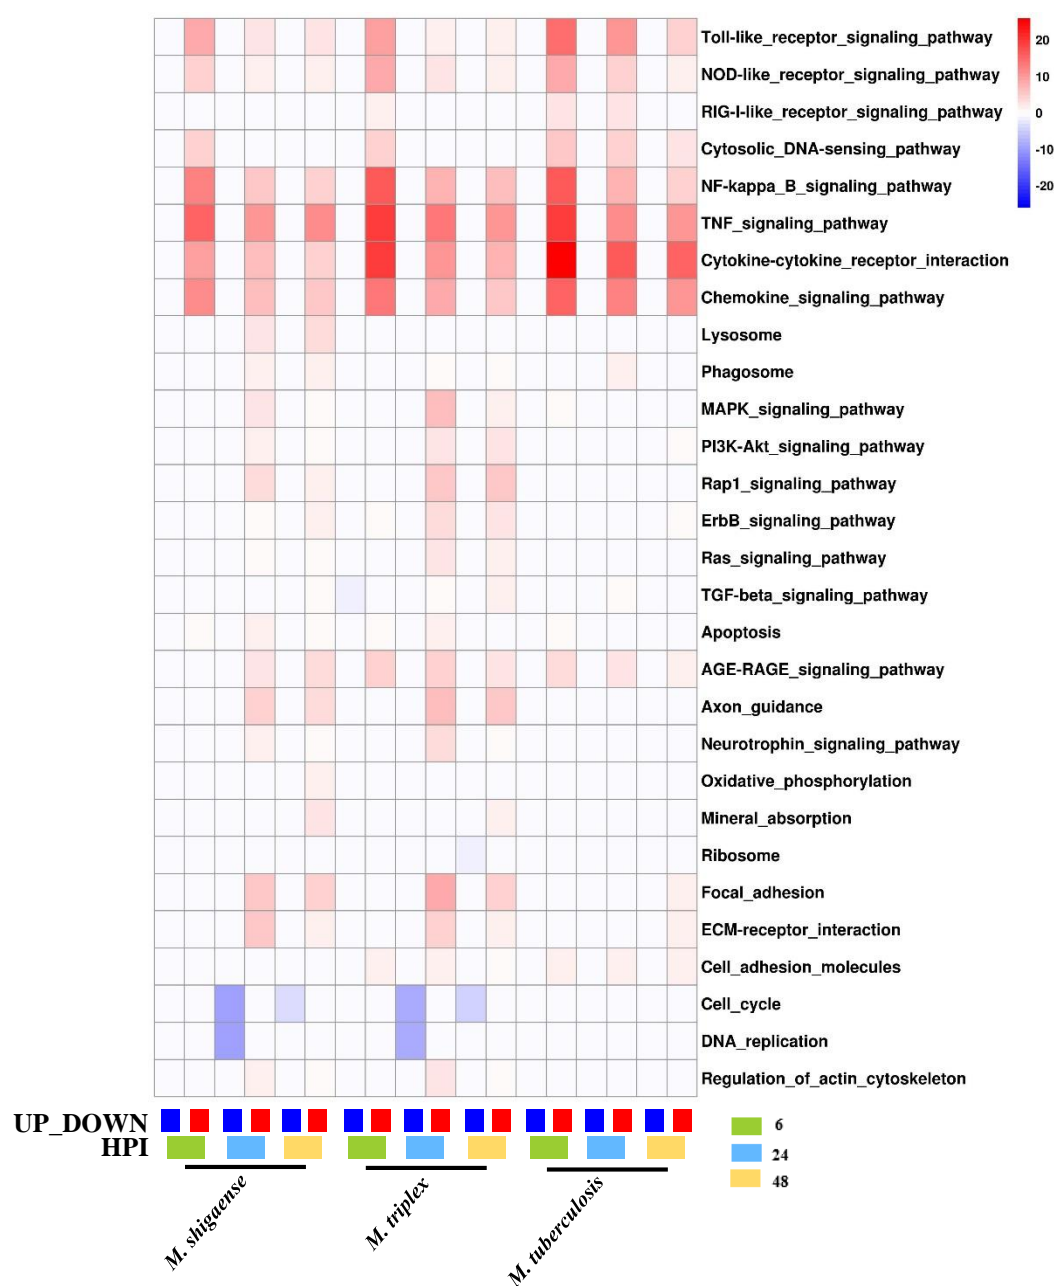

**Supplementary Figure S7. KEGG pathway enrichment for *M.shigaense*, *M. triplex* and *M. tuberculosis*.** Colour red means significant enrichment by up-regulated genes, and blue by down-regulated genes. Each score represents minus base 10 logarithm of enrichment p-values. The UP\_DOWN row means enrichment by up-regulated genes (red) or down-regulated genes (blue).
