# Supplementary material
Source: publisher figshare collection journal article supplement (https://tandf.figshare.com/articles/dataset/_/7936865)
Supplement: Supplementary file 1 [file 1 › temi_a_12040023_sm0008.xlsx]

## Sheet: Sheet1
Supplementary Table S1. RT-PCR primers
Gene	Primer	Sequence
B-actin	F	5'-GCCGCCAGCTCACCAT-3'
	R	5'-AATCCTTCTGACCCATGCCC-3'
CCL4	F	5'-CTGTGCTGATCCCAGTGAATC-3'
	R	5'-TCAGTTCAGTTCCAGGTCATACA-3'
TLR7	F	5'-TCCTTGGGGCTAGATGGTTTC-3'
	R	5'-TCCACGATCACATGGTTCTTTG-3'
CCL3L1	F	5'-CACCTCCCGACAGATTCCAC-3'
	R	5'-GGTCACTGACGTATTTCTGGAC-3'
CXCL5	F	5'-AGCTGCGTTGCGTTTGTTTAC-3'
	R	5'-TGGCGAACACTTGCAGATTAC-3'
TRIM22	F	5'-CTGTCCTGTGTGTCAGACCAG-3'
	R	5'-TGTGGGCTCATCTTGACCTCT-3'
IFI44L	F	5'-AGCCGTCAGGGATGTACTATAAC-3'
	R	5'-AGGGAATCATTTGGCTCTGTAGA-3'
