# Supplementary material
Source: publisher figshare collection journal article supplement (https://tandf.figshare.com/articles/dataset/_/7936865)
Supplement: Supplementary file 1 [file 1 › temi_a_12040023_sm0009.xlsx]

## Sheet: sheet 1
Supplementary Table S2. Summary of sequencing reads
PacBio
Total reads	42739
Total bases (bp)	97859733
Illumina Hiseq2000
Total read pair	9,012,652 X 2
Total bases (bp)	1802530400
Average read length (bp)	100
Average coverage	346
