# Supplementary material
Source: publisher figshare collection journal article supplement (https://tandf.figshare.com/articles/dataset/_/7936865)
Supplement: Supplementary file 1 [file 1 › temi_a_12040023_sm0010.xlsx]

## Sheet: Sheet1
Supplementary Table S3. Summary of M. shigaense genome
Category	Value
Genome length (bp)	5207883
GC content (%)	67.2
Genes	5098
rRNAs	3
tRNAs	47
Pseudogenes	43
Gene/Genome (%)	91.98
Gene average length (bp)	929
Gene density (genes/kb)	0.9789
