# Supplementary material
Source: publisher figshare collection journal article supplement (https://tandf.figshare.com/articles/dataset/_/7936865)
Supplement: Supplementary file 1 [file 1 › temi_a_12040023_sm0011.xlsx]

## Sheet: Sheet1
Supplementary Table S4. Information of M. shigaense protein-coding genes
Id	Start	End	Strand	Protein length	RPKM	M. shigaense_specific	M. shigaense_M. triplex_specific	Single_copy	COG	NOG	Functional categories	Description of nr tophits
M. shigaense_orf00001	33	1517	+	494	80	0	0	1	COG0593	NA	L	chromosomal replication initiation protein [Mycobacterium sp. H4Y] gi|442763435|gb|ELR81434.1| chromosomal replication initiation protein [Mycobacterium sp. H4Y]
M. shigaense_orf00002	2009	3208	+	399	131	0	0	1	COG0592	NA	L	DNA polymerase III subunit beta [Mycobacterium intracellulare ATCC 13950]
M. shigaense_orf00003	3224	4378	+	384	83	0	0	1	COG1195	NA	L	recombination protein F [Mycobacterium parascrofulaceum ATCC BAA-614] gi|295897463|gb|EFG77062.1| recombination protein F [Mycobacterium parascrofulaceum ATCC BAA-614]
M. shigaense_orf00004	4375	4710	+	111	54	0	0	0	NA	NA	NA	hypothetical protein MFORT_28070 [Mycobacterium fortuitum subsp. fortuitum DSM 46621] gi|403651359|gb|EJZ06501.1| hypothetical protein MFORT_28070 [Mycobacterium fortuitum subsp. fortuitum DSM 46621]
M. shigaense_orf00005	4688	4939	+	83	99	0	0	1	COG5512	NA	R	hypothetical protein MCOL_V203930 [Mycobacterium colombiense CECT 3035] gi|400333855|gb|EJO91349.1| hypothetical protein MCOL_V203930 [Mycobacterium colombiense CECT 3035]
M. shigaense_orf00006	5206	7239	+	677	570	0	0	0	COG0187	NA	L	DNA gyrase subunit B [Mycobacterium intracellulare ATCC 13950] gi|379744725|ref|YP_005335546.1| DNA gyrase subunit B [Mycobacterium intracellulare ATCC 13950] gi|379752018|ref|YP_005340690.1| DNA gyrase subunit B [Mycobacterium intracellulare MOTT-02 ...
M. shigaense_orf00008	7281	9794	+	837	445	0	0	1	COG0188	NA	L	DNA gyrase subunit A [Mycobacterium colombiense CECT 3035] gi|400333857|gb|EJO91351.1| DNA gyrase subunit A [Mycobacterium colombiense CECT 3035]
M. shigaense_orf00010	9918	10778	+	286	222	0	1	0	NA	NOG08313	NA	hypothetical protein MCOL_V203945 [Mycobacterium colombiense CECT 3035] gi|400333858|gb|EJO91352.1| hypothetical protein MCOL_V203945 [Mycobacterium colombiense CECT 3035]
M. shigaense_orf00011	10942	11061	+	39	103	1	0	0	NA	NA	NA	NA
M. shigaense_orf00012	11593	12342	+	249	184	1	0	0	NA	NA	NA	thioesterase [Nocardia farcinica IFM 10152] gi|54016029|dbj|BAD57399.1| putative thioesterase [Nocardia farcinica IFM 10152]
M. shigaense_orf00013	12907	12362	-	181	100	0	0	0	NA	NOG292061	NA	TetR family transcriptional regulator [Mycobacterium colombiense CECT 3035] gi|400331126|gb|EJO88622.1| TetR family transcriptional regulator [Mycobacterium colombiense CECT 3035]
M. shigaense_orf00015	13100	14314	+	404	58	0	0	0	COG2124	NA	Q	cytochrome P450 [Mycobacterium colombiense CECT 3035] gi|400331127|gb|EJO88623.1| cytochrome P450 [Mycobacterium colombiense CECT 3035]
M. shigaense_orf00016	14759	14334	-	141	103	0	0	0	NA	NOG45001	NA	hypothetical protein MCOL_V210265 [Mycobacterium colombiense CECT 3035] gi|400331128|gb|EJO88624.1| hypothetical protein MCOL_V210265 [Mycobacterium colombiense CECT 3035]
M. shigaense_orf00017	14884	15414	+	176	226	0	0	1	COG0652	NA	O	ppiA [Mycobacterium colombiense CECT 3035] gi|400331129|gb|EJO88625.1| ppiA [Mycobacterium colombiense CECT 3035]
M. shigaense_orf00018	15803	15438	-	121	126	0	0	0	NA	NOG12206	NA	hypothetical protein MAP0012c [Mycobacterium avium subsp. paratuberculosis K-10] gi|41394458|gb|AAS02329.1| hypothetical protein MAP_0012c [Mycobacterium avium subsp. paratuberculosis K-10]
M. shigaense_orf00019	16306	16025	-	93	188	0	0	1	NA	NOG42983;NOG243487;NOG257509	S	septation inhibitor protein [Mycobacterium avium subsp. paratuberculosis K-10] gi|118464987|ref|YP_879316.1| septation inhibitor protein [Mycobacterium avium 104] gi|254773065|ref|ZP_05214581.1| putative septation inhibitor protein [Mycobacterium avi ...
M. shigaense_orf00020	16429	17172	+	247	82	0	0	0	COG3879	NA	S	hypothetical protein MAPs_24220 [Mycobacterium avium subsp. paratuberculosis S397] gi|336462089|gb|EGO40931.1| hypothetical protein MAPs_24220 [Mycobacterium avium subsp. paratuberculosis S397]
M. shigaense_orf00022	17205	17906	+	233	122	0	0	1	COG0512	NA	H,E	para-aminobenzoate synthase component II [Mycobacterium colombiense CECT 3035] gi|400331133|gb|EJO88629.1| para-aminobenzoate synthase component II [Mycobacterium colombiense CECT 3035]
M. shigaense_orf00023	19755	17884	-	623	105	0	0	0	COG0515;COG2815	NA	S,K,R,T,L	serine/threonine protein kinase [Mycobacterium colombiense CECT 3035] gi|400331134|gb|EJO88630.1| serine/threonine protein kinase [Mycobacterium colombiense CECT 3035]
M. shigaense_orf00026	21059	19752	-	435	101	0	0	1	COG0515	NA	K,R,T,L	serine/threonine protein kinase [Mycobacterium colombiense CECT 3035] gi|400331135|gb|EJO88631.1| serine/threonine protein kinase [Mycobacterium colombiense CECT 3035]
M. shigaense_orf00027	22555	21074	-	493	103	0	0	1	COG0768	NA	M	penicillin binding protein transpeptidase domain protein [Mycobacterium parascrofulaceum ATCC BAA-614] gi|295897556|gb|EFG77152.1| penicillin binding protein transpeptidase domain protein [Mycobacterium parascrofulaceum ATCC BAA-614]
M. shigaense_orf00028	23961	22552	-	469	64	0	0	1	COG0772	NA	D	RodA [Mycobacterium avium subsp. avium ATCC 25291] gi|417746387|ref|ZP_12394895.1| bacterial cell division membrane protein [Mycobacterium avium subsp. paratuberculosis S397] gi|336462094|gb|EGO40936.1| bacterial cell division membrane protein [Mycob ...
M. shigaense_orf00029	25400	23958	-	480	111	0	0	1	COG0631	NA	T	hypothetical protein ML0020 [Mycobacterium leprae TN] gi|221229361|ref|YP_002502777.1| hypothetical protein MLBr_00020 [Mycobacterium leprae Br4923] gi|13092430|emb|CAC29528.1| conserved hypothetical protein [Mycobacterium leprae] gi|219932468|emb|CA ...
M. shigaense_orf00031	25933	25466	-	155	97	0	0	1	COG1716	NA	T	hypothetical protein MintA_04188 [Mycobacterium intracellulare ATCC 13950] gi|379744741|ref|YP_005335562.1| hypothetical protein OCU_00210 [Mycobacterium intracellulare ATCC 13950] gi|379752034|ref|YP_005340706.1| hypothetical protein OCO_00210 [Myco ...
M. shigaense_orf00032	27608	26055	-	517	140	0	0	0	COG1716	NA	T	FHA domain containing protein [Mycobacterium liflandii 128FXT] gi|442581022|gb|AGC60165.1| FHA domain containing protein [Mycobacterium liflandii 128FXT]
M. shigaense_orf00033	27672	27827	+	51	46	1	0	0	NA	NA	NA	NA
M. shigaense_orf00035	28146	27889	-	85	214	0	0	0	NA	NA	NA	hypothetical protein MintA_21789 [Mycobacterium intracellulare ATCC 13950] gi|379744866|ref|YP_005335687.1| hypothetical protein OCU_01460 [Mycobacterium intracellulare ATCC 13950] gi|379752155|ref|YP_005340827.1| hypothetical protein OCO_01420 [Myco ...
M. shigaense_orf00036	28328	28822	+	164	112	0	1	0	NA	NOG42023	NA	hypothetical protein MintA_21789 [Mycobacterium intracellulare ATCC 13950] gi|379744866|ref|YP_005335687.1| hypothetical protein OCU_01460 [Mycobacterium intracellulare ATCC 13950] gi|379752155|ref|YP_005340827.1| hypothetical protein OCO_01420 [Myco ...
M. shigaense_orf00037	30197	28836	-	453	71	0	0	0	COG5651	NA	N	PPE family protein [Mycobacterium colombiense CECT 3035] gi|400332755|gb|EJO90250.1| PPE family protein [Mycobacterium colombiense CECT 3035]
M. shigaense_orf00038	30888	30556	-	110	117	0	0	0	COG2388	NA	R	hypothetical protein OCQ_00300 [Mycobacterium intracellulare MOTT-64] gi|443308347|ref|ZP_21038133.1| hypothetical protein W7U_21925 [Mycobacterium sp. H4Y] gi|378807409|gb|AFC51543.1| hypothetical protein OCQ_00300 [Mycobacterium intracellulare MOTT ...
M. shigaense_orf00039	31871	30885	-	328	96	0	0	0	COG1741	NA	R	hypothetical protein MMAR_0040 [Mycobacterium marinum M] gi|183173401|gb|ACC38511.1| conserved hypothetical protein [Mycobacterium marinum M]
M. shigaense_orf00040	32482	31931	-	183	57	0	0	0	NA	NA	NA	acyl-CoA dehydrogenase (NADP(+)) [Mycobacterium parascrofulaceum ATCC BAA-614] gi|295897546|gb|EFG77142.1| acyl-CoA dehydrogenase (NADP(+)) [Mycobacterium parascrofulaceum ATCC BAA-614]
M. shigaense_orf00043	33822	33406	-	138	69	0	0	0	NA	NOG47710	NA	transcription factor WhiB family protein [Mycobacterium intracellulare ATCC 13950] gi|379744754|ref|YP_005335575.1| transcription factor WhiB family protein [Mycobacterium intracellulare ATCC 13950] gi|379752046|ref|YP_005340718.1| transcription fact ...
M. shigaense_orf00045	33967	34755	+	262	87	0	0	0	COG1396	NA	K	putative transcriptional regulatory protein [Mycobacterium canettii CIPT 140010059] gi|433625114|ref|YP_007258743.1| Putative transcriptional regulatory protein [Mycobacterium canettii CIPT 140060008] gi|340003246|emb|CCC42363.1| putative transcripti ...
M. shigaense_orf00046	34752	35576	+	274	61	0	0	0	COG0791	NA	M	NLP/P60 family protein [Mycobacterium intracellulare MOTT-02] gi|378802264|gb|AFC46399.1| NLP/P60 family protein [Mycobacterium intracellulare MOTT-02]
M. shigaense_orf00047	35627	35989	+	120	70	0	0	0	NA	NOG40985	NA	Conserved hypothetical protein [Mycobacterium tuberculosis H37Rv] gi|148659785|ref|YP_001281308.1| hypothetical protein MRA_0028 [Mycobacterium tuberculosis H37Ra] gi|148821216|ref|YP_001285970.1| hypothetical protein TBFG_10025 [Mycobacterium tuberc ...
M. shigaense_orf00050	36124	37530	+	468	47	0	0	0	NA	NA	NA	hypothetical protein OCO_00370 [Mycobacterium intracellulare MOTT-02] gi|378802266|gb|AFC46401.1| hypothetical protein OCO_00370 [Mycobacterium intracellulare MOTT-02]
M. shigaense_orf00051	37585	37902	+	105	94	0	0	0	NA	NOG43033	NA	hypothetical protein MCOL_V210395 [Mycobacterium colombiense CECT 3035] gi|400331154|gb|EJO88650.1| hypothetical protein MCOL_V210395 [Mycobacterium colombiense CECT 3035]
M. shigaense_orf00052	37899	38201	+	100	61	0	0	0	NA	NOG42648	NA	hypothetical protein MCOL_V210400 [Mycobacterium colombiense CECT 3035] gi|400331155|gb|EJO88651.1| hypothetical protein MCOL_V210400 [Mycobacterium colombiense CECT 3035]
M. shigaense_orf00053	38384	38241	-	47	64	0	0	0	NA	NA	NA	hypothetical protein MT0031 [Mycobacterium tuberculosis CDC1551] gi|167968161|ref|ZP_02550438.1| hypothetical protein MtubH3_09042 [Mycobacterium tuberculosis H37Ra] gi|253796944|ref|YP_003029945.1| hypothetical protein TBMG_03973 [Mycobacterium tube ...
M. shigaense_orf00054	38572	40005	+	477	115	0	0	0	NA	NOG41717	NA	hypothetical protein MXEN_05540 [Mycobacterium xenopi RIVM700367] gi|383337537|gb|EID15913.1| hypothetical protein MXEN_05540 [Mycobacterium xenopi RIVM700367]
M. shigaense_orf00055	40071	40397	+	108	72	0	0	0	NA	NOG43555	NA	Conserved protein of unknown function [Mycobacterium canettii CIPT 140070010] gi|432160709|emb|CCK58037.1| Conserved protein of unknown function [Mycobacterium canettii CIPT 140070010]
M. shigaense_orf00057	40449	41939	+	496	57	0	0	0	NA	NOG46582	NA	hypothetical protein MXEN_05555 [Mycobacterium xenopi RIVM700367] gi|383337540|gb|EID15916.1| hypothetical protein MXEN_05555 [Mycobacterium xenopi RIVM700367]
M. shigaense_orf00059	41999	46021	+	1340	66	0	0	0	COG1674	NA	D	DNA translocase FtsK [Mycobacterium xenopi RIVM700367] gi|383337541|gb|EID15917.1| DNA translocase FtsK [Mycobacterium xenopi RIVM700367]
M. shigaense_orf00060	46196	46501	+	101	165	0	0	0	NA	NA	NA	PE family protein [Mycobacterium xenopi RIVM700367] gi|383337542|gb|EID15918.1| PE family protein [Mycobacterium xenopi RIVM700367]
M. shigaense_orf00062	46514	47716	+	400	85	0	0	0	NA	NA	NA	hypothetical protein MXEN_05570 [Mycobacterium xenopi RIVM700367] gi|383337543|gb|EID15919.1| hypothetical protein MXEN_05570 [Mycobacterium xenopi RIVM700367]
M. shigaense_orf00063	48498	47725	-	257	84	0	0	0	NA	NOG10036	S	Conserved protein of unknown function [Mycobacterium canettii CIPT 140070008] gi|432156713|emb|CCK53978.1| Conserved protein of unknown function [Mycobacterium canettii CIPT 140070008]
M. shigaense_orf00065	49809	48508	-	433	72	0	0	0	COG0477	NA	P,R,E,G	integral membrane protein [Mycobacterium parascrofulaceum ATCC BAA-614] gi|295897534|gb|EFG77130.1| integral membrane protein [Mycobacterium parascrofulaceum ATCC BAA-614]
M. shigaense_orf00066	49941	50546	+	201	174	0	0	1	COG1678	NA	K	hypothetical protein MCOL_V210425 [Mycobacterium colombiense CECT 3035] gi|400331160|gb|EJO88656.1| hypothetical protein MCOL_V210425 [Mycobacterium colombiense CECT 3035]
M. shigaense_orf00068	51539	50550	-	329	78	0	0	0	COG0385	NA	R	hypothetical protein O3I_041055 [Nocardia brasiliensis ATCC 700358] gi|407312255|gb|AFU06156.1| hypothetical protein O3I_041055 [Nocardia brasiliensis ATCC 700358]
M. shigaense_orf00069	51924	51568	-	118	104	0	0	0	NA	NOG13311	NA	hypothetical protein MintA_04063 [Mycobacterium intracellulare ATCC 13950] gi|379744767|ref|YP_005335588.1| hypothetical protein OCU_00470 [Mycobacterium intracellulare ATCC 13950] gi|379752059|ref|YP_005340731.1| hypothetical protein OCO_00460 [Myco ...
M. shigaense_orf00070	52736	51993	-	247	81	0	0	0	NA	NOG117634;NOG10551	S	proline rich antigen, partial [Mycobacterium parascrofulaceum ATCC BAA-614] gi|295897577|gb|EFG77172.1| proline rich antigen [Mycobacterium parascrofulaceum ATCC BAA-614]
M. shigaense_orf00071	53357	56275	+	972	96	0	0	1	COG0495	NA	J	leucine--tRNA ligase [Mycobacterium parascrofulaceum ATCC BAA-614] gi|295897576|gb|EFG77171.1| leucine--tRNA ligase [Mycobacterium parascrofulaceum ATCC BAA-614]
M. shigaense_orf00073	56955	56284	-	223	118	0	0	0	COG1028	NA	I,Q,R	short chain dehydrogenase [Mycobacterium intracellulare ATCC 13950] gi|379744770|ref|YP_005335591.1| short chain dehydrogenase [Mycobacterium intracellulare ATCC 13950] gi|378797134|gb|AFC41270.1| short chain dehydrogenase [Mycobacterium intracellula ...
M. shigaense_orf00075	57510	57004	-	168	76	0	0	0	COG1846	NA	K	MarR family transcriptional regulator [Mycobacterium parascrofulaceum ATCC BAA-614] gi|295897574|gb|EFG77169.1| MarR family transcriptional regulator [Mycobacterium parascrofulaceum ATCC BAA-614]
M. shigaense_orf00076	58296	57577	-	239	75	0	0	0	COG1126	NA	E	ABC transporter ATP-binding protein [Mycobacterium colombiense CECT 3035] gi|400331166|gb|EJO88662.1| ABC transporter ATP-binding protein [Mycobacterium colombiense CECT 3035]
M. shigaense_orf00077	60140	58323	-	605	64	0	0	0	COG0765;COG0834	NA	E,T	amino acid ABC transporter permease [Mycobacterium colombiense CECT 3035] gi|400331167|gb|EJO88663.1| amino acid ABC transporter permease [Mycobacterium colombiense CECT 3035]
M. shigaense_orf00078	60930	60190	-	246	77	0	0	0	COG1802	NA	K	GntR family transcriptional regulator [Mycobacterium sp. MOTT36Y] gi|386786920|gb|AFJ33039.1| GntR family transcriptional regulator [Mycobacterium sp. MOTT36Y]
M. shigaense_orf00079	61875	61051	-	274	63	0	0	0	COG2141	NA	C	hypothetical protein MCOL_V210470 [Mycobacterium colombiense CECT 3035] gi|400331169|gb|EJO88665.1| hypothetical protein MCOL_V210470 [Mycobacterium colombiense CECT 3035]
M. shigaense_orf00080	62542	61949	-	197	71	0	0	0	NA	NOG233003	K	TetR family transcriptional regulator [Mycobacterium sp. H4Y] gi|442763489|gb|ELR81488.1| TetR family transcriptional regulator [Mycobacterium sp. H4Y]
M. shigaense_orf00081	63483	62557	-	308	102	0	0	0	COG0596	NA	R	hypothetical protein OCQ_00570 [Mycobacterium intracellulare MOTT-64] gi|378807436|gb|AFC51570.1| hypothetical protein OCQ_00570 [Mycobacterium intracellulare MOTT-64]
M. shigaense_orf00082	63683	63483	-	66	55	1	0	0	NA	NA	NA	NA
M. shigaense_orf00083	64892	63792	-	366	448	0	0	0	COG1260	NA	I	myo-inositol-1-phosphate synthase [Mycobacterium colombiense CECT 3035] gi|400331175|gb|EJO88671.1| myo-inositol-1-phosphate synthase [Mycobacterium colombiense CECT 3035]
M. shigaense_orf00084	65513	64971	-	180	389	0	0	1	COG1695	NA	K	hypothetical protein MORY_00685 [Mycobacterium orygis 112400015]
M. shigaense_orf00085	65849	66253	+	134	305	0	0	1	NA	NOG07408	S	hypothetical protein MCOL_V210515 [Mycobacterium colombiense CECT 3035] gi|400331178|gb|EJO88674.1| hypothetical protein MCOL_V210515 [Mycobacterium colombiense CECT 3035]
M. shigaense_orf00087	66408	68849	+	813	144	0	0	1	COG0744	NA	M	transglycosylase [Mycobacterium sp. MOTT36Y] gi|386786934|gb|AFJ33053.1| transglycosylase [Mycobacterium sp. MOTT36Y]
M. shigaense_orf00088	68846	70492	+	548	106	0	0	0	COG5650	NA	S	hypothetical protein MAV_0072 [Mycobacterium avium 104] gi|254773118|ref|ZP_05214634.1| hypothetical protein MaviaA2_00331 [Mycobacterium avium subsp. avium ATCC 25291] gi|118168566|gb|ABK69463.1| conserved hypothetical protein [Mycobacterium avium 1 ...
M. shigaense_orf00090	70523	70921	+	132	100	0	0	0	NA	NA	NA	transcriptional regulator, AraC family [Mycobacterium rhodesiae JS60] gi|353190543|gb|EHB56053.1| transcriptional regulator, AraC family [Mycobacterium rhodesiae JS60]
M. shigaense_orf00092	70918	71550	+	210	83	0	0	0	COG4977	NA	K	transcriptional regulator, AraC family [Mycobacterium rhodesiae JS60] gi|353190543|gb|EHB56053.1| transcriptional regulator, AraC family [Mycobacterium rhodesiae JS60]
M. shigaense_orf00093	73055	71538	-	505	69	1	0	0	NA	NA	NA	long-chain-fatty-acid--CoA ligase [Streptomyces avermitilis MA-4680] gi|15824221|dbj|BAB69379.1| long-chain fatty acid--CoA ligase [Streptomyces avermitilis] gi|29604244|dbj|BAC68315.1| putative acyl-CoA synthetase, long-chain fatty acid:CoA ligase [ ...
M. shigaense_orf00095	73597	73055	-	180	47	1	0	0	NA	NA	NA	hypothetical protein GOAMR_28_00190 [Gordonia amarae NBRC 15530] gi|358240267|dbj|GAB05132.1| hypothetical protein GOAMR_28_00190 [Gordonia amarae NBRC 15530]
M. shigaense_orf00096	74481	73594	-	295	66	0	0	0	NA	NA	NA	taurine catabolism dioxygenase [Streptomyces somaliensis DSM 40738]
M. shigaense_orf00097	74702	76048	+	448	63	0	0	0	NA	NA	NA	hypothetical protein Mjls_4405 [Mycobacterium sp. JLS] gi|126236776|gb|ABO00177.1| conserved hypothetical protein [Mycobacterium sp. JLS]
M. shigaense_orf00098	76635	76045	-	196	54	0	0	0	COG0693	NA	R	ThiJ/PfpI family protein [Rhodococcus imtechensis RKJ300 = JCM 13270] gi|432342458|ref|ZP_19591729.1| ThiJ/PfpI family protein [Rhodococcus wratislaviensis IFP 2016] gi|383838240|gb|EID77625.1| ThiJ/PfpI family protein [Rhodococcus imtechensis RKJ300 ...
M. shigaense_orf00099	77150	77440	+	96	342	0	0	1	COG0360	NA	J	30S ribosomal protein S6 [Mycobacterium parascrofulaceum ATCC BAA-614] gi|295897623|gb|EFG77217.1| 30S ribosomal protein S6 [Mycobacterium parascrofulaceum ATCC BAA-614]
M. shigaense_orf00100	77512	78030	+	172	238	0	0	1	COG0629	NA	L	single-stranded DNA-binding protein [Mycobacterium intracellulare ATCC 13950] gi|379744791|ref|YP_005335612.1| single-stranded DNA-binding protein [Mycobacterium intracellulare ATCC 13950] gi|379752083|ref|YP_005340755.1| single-stranded DNA-binding ...
M. shigaense_orf00102	78160	78041	-	39	192	1	0	0	NA	NA	NA	NA
M. shigaense_orf00103	78132	78326	+	64	210	0	0	1	COG0238	NA	J	SSU ribosomal protein S18P [Mycobacterium chubuense NBB4] gi|390618812|gb|AFM19962.1| SSU ribosomal protein S18P [Mycobacterium chubuense NBB4]
M. shigaense_orf00105	78357	78815	+	152	184	0	0	1	COG0359	NA	J	50S ribosomal protein L9 RplI [Mycobacterium tuberculosis H37Rv] gi|15839433|ref|NP_334470.1| 50S ribosomal protein L9 [Mycobacterium tuberculosis CDC1551] gi|31791233|ref|NP_853726.1| 50S ribosomal protein L9 [Mycobacterium bovis AF2122/97] gi|12163 ...
M. shigaense_orf00107	78857	78988	+	43	69	1	0	0	NA	NA	NA	NA
M. shigaense_orf00108	79349	80725	+	458	70	0	0	0	COG0305	NA	L	replicative DNA helicase [Mycobacterium colombiense CECT 3035] gi|400331186|gb|EJO88682.1| replicative DNA helicase [Mycobacterium colombiense CECT 3035]
M. shigaense_orf00110	81458	81264	-	64	58	1	0	0	NA	NA	NA	NA
M. shigaense_orf00112	82363	81737	-	208	108	0	0	0	COG2409	NA	R	MmpL4 protein [Mycobacterium avium subsp. avium ATCC 25291]
M. shigaense_orf00114	83090	82749	-	113	435	0	0	0	NA	NA	NA	hypothetical protein JDM601_1263 [Mycobacterium sp. JDM601] gi|333485871|gb|AEF35263.1| helix-turn-helix domain-containing protein [Mycobacterium sp. JDM601]
M. shigaense_orf00115	83391	83050	-	113	497	0	0	0	NA	NA	NA	hypothetical protein GSI01S_05_00580 [Gordonia sihwensis NBRC 108236] gi|441460231|dbj|GAC59739.1| hypothetical protein GSI01S_05_00580 [Gordonia sihwensis NBRC 108236]
M. shigaense_orf00116	84019	83660	-	119	113	1	0	0	NA	NA	NA	integrase family protein [Mycobacterium tusciae JS617] gi|373545161|gb|EHP72006.1| integrase family protein [Mycobacterium tusciae JS617]
M. shigaense_orf00117	84465	84160	-	101	251	1	0	0	NA	NA	NA	integrase family protein [Mycobacterium tusciae JS617] gi|373545161|gb|EHP72006.1| integrase family protein [Mycobacterium tusciae JS617]
M. shigaense_orf00119	84800	84931	+	43	77	1	0	0	NA	NA	NA	putative transposase [Rhodococcus sp. JVH1] gi|396928591|gb|EJI95804.1| putative transposase [Rhodococcus sp. JVH1]
M. shigaense_orf00120	85156	86247	+	363	69	1	0	0	NA	NA	NA	putative oxidoreductase [Ilumatobacter coccineum YM16-304] gi|464099890|dbj|BAN02772.1| putative oxidoreductase [Ilumatobacter coccineum YM16-304]
M. shigaense_orf00121	86319	86897	+	192	74	0	0	0	COG2801	NA	L	integrase catalytic subunit [Mycobacterium sp. MCS] gi|119855210|ref|YP_935813.1| integrase catalytic subunit [Mycobacterium sp. KMS] gi|108772985|gb|ABG11706.1| Integrase, catalytic region [Mycobacterium sp. MCS] gi|119697927|gb|ABL94998.1| Integras ...
M. shigaense_orf00122	86984	87274	+	96	38	0	0	0	COG2801	NA	L	transposase, ISMyma01_aa1 [Mycobacterium sp. H4Y] gi|443306004|ref|ZP_21035792.1| transposase, ISMyma01_aa1 [Mycobacterium sp. H4Y] gi|442767245|gb|ELR85239.1| transposase, ISMyma01_aa1 [Mycobacterium sp. H4Y] gi|442767568|gb|ELR85562.1| transposase, ...
M. shigaense_orf00123	88105	88281	+	58	78	0	0	0	NA	NA	NA	putative transposase [Rhodococcus erythropolis PR4] gi|77019836|dbj|BAE46212.1| putative transposase [Rhodococcus erythropolis PR4]
M. shigaense_orf00124	88685	88819	+	44	244	1	0	0	NA	NA	NA	conserved hypothetical protein [Mycobacterium parascrofulaceum ATCC BAA-614] gi|295898116|gb|EFG77691.1| conserved hypothetical protein [Mycobacterium parascrofulaceum ATCC BAA-614]
M. shigaense_orf00125	88900	89892	+	330	80	0	0	0	COG5297	NA	G	hypothetical protein MintA_21096 [Mycobacterium intracellulare ATCC 13950]
M. shigaense_orf00128	90044	91114	+	356	67	1	0	0	NA	NA	NA	diguanylate cyclase [Mycobacterium colombiense CECT 3035] gi|400329002|gb|EJO86513.1| diguanylate cyclase [Mycobacterium colombiense CECT 3035]
M. shigaense_orf00129	91462	91124	-	112	87	0	0	0	NA	NA	NA	anti-sigma-factor antagonist [Mycobacterium sp. MCS] gi|119866416|ref|YP_936368.1| anti-sigma-factor antagonist [Mycobacterium sp. KMS] gi|126432953|ref|YP_001068644.1| anti-sigma-factor antagonist [Mycobacterium sp. JLS] gi|108767750|gb|ABG06472.1| ...
M. shigaense_orf00132	95595	91459	-	1378	58	0	0	0	COG0745;COG0642;COG2208;COG2202	NA	K,T	PAS/PAC sensor hybrid histidine kinase [Mycobacterium sp. JLS] gi|126232752|gb|ABN96152.1| PAS/PAC sensor hybrid histidine kinase [Mycobacterium sp. JLS]
M. shigaense_orf00133	95827	95982	+	51	161	0	0	0	NA	NA	NA	hypothetical protein Mycsm_06472 [Mycobacterium smegmatis JS623] gi|433300793|gb|AGB26613.1| hypothetical protein Mycsm_06472 [Mycobacterium smegmatis JS623]
M. shigaense_orf00135	96649	95996	-	217	86	1	0	0	NA	NA	NA	transcriptional regulator [Mycobacterium rhodesiae NBB3] gi|359817878|gb|AEV70691.1| transcriptional regulator [Mycobacterium rhodesiae NBB3]
M. shigaense_orf00136	96710	97468	+	252	113	0	0	0	COG0300	NA	R	short-chain dehydrogenase/reductase SDR [Mycobacterium tusciae JS617] gi|373549731|gb|EHP76394.1| short-chain dehydrogenase/reductase SDR [Mycobacterium tusciae JS617]
M. shigaense_orf00137	98111	97452	-	219	187	1	0	0	NA	NA	NA	transcriptional regulator [Mycobacterium rhodesiae NBB3] gi|359817880|gb|AEV70693.1| transcriptional regulator [Mycobacterium rhodesiae NBB3]
M. shigaense_orf00139	98155	98700	+	181	68	0	0	0	NA	NA	NA	hypothetical protein [Mycobacterium rhodesiae NBB3] gi|359817881|gb|AEV70694.1| hypothetical protein MycrhN_0042 [Mycobacterium rhodesiae NBB3]
M. shigaense_orf00140	98697	99485	+	262	60	1	0	0	NA	NA	NA	dehydrogenase [Mycobacterium xenopi RIVM700367] gi|383337426|gb|EID15803.1| dehydrogenase [Mycobacterium xenopi RIVM700367]
M. shigaense_orf00141	99670	99524	-	48	70	1	0	0	NA	NA	NA	hypothetical protein W7U_22395 [Mycobacterium sp. H4Y] gi|442763557|gb|ELR81556.1| hypothetical protein W7U_22395 [Mycobacterium sp. H4Y]
M. shigaense_orf00142	99846	100010	+	54	87	0	0	0	NA	NA	NA	hypothetical protein MCOL_V210610 [Mycobacterium colombiense CECT 3035] gi|400331195|gb|EJO88691.1| hypothetical protein MCOL_V210610 [Mycobacterium colombiense CECT 3035]
M. shigaense_orf00143	101454	100096	-	452	62	0	0	0	NA	NOG09285	S	acyltransferase [Mycobacterium parascrofulaceum ATCC BAA-614] gi|295897591|gb|EFG77185.1| acyltransferase [Mycobacterium parascrofulaceum ATCC BAA-614]
M. shigaense_orf00144	103514	101535	-	659	43	0	0	0	COG1640	NA	G	4-alpha-glucanotransferase [Mycobacterium parascrofulaceum ATCC BAA-614] gi|295897588|gb|EFG77182.1| 4-alpha-glucanotransferase [Mycobacterium parascrofulaceum ATCC BAA-614]
M. shigaense_orf00145	103637	104713	+	358	435	0	0	0	COG2801	NA	L	integrase catalytic subunit [Mycobacterium sp. MCS] gi|119867188|ref|YP_937140.1| integrase catalytic subunit [Mycobacterium sp. KMS] gi|108768511|gb|ABG07233.1| Integrase, catalytic region [Mycobacterium sp. MCS] gi|119693277|gb|ABL90350.1| Integras ...
M. shigaense_orf00146	105663	104830	-	277	128	0	0	0	COG2141	NA	C	hypothetical protein MMAR_3559 [Mycobacterium marinum M] gi|183176866|gb|ACC41976.1| conserved hypothetical protein [Mycobacterium marinum M]
M. shigaense_orf00149	106057	106887	+	276	63	0	0	0	NA	NOG05499	S	hypothetical protein MintA_16215 [Mycobacterium intracellulare ATCC 13950] gi|379747774|ref|YP_005338595.1| hypothetical protein OCU_30550 [Mycobacterium intracellulare ATCC 13950] gi|379755076|ref|YP_005343748.1| hypothetical protein OCO_30640 [Myco ...
M. shigaense_orf00150	108121	106898	-	407	90	0	0	0	COG0477	NA	P,R,E,G	major facilitator family protein transporter [Mycobacterium colombiense CECT 3035] gi|400330331|gb|EJO87829.1| major facilitator family protein transporter [Mycobacterium colombiense CECT 3035]
M. shigaense_orf00151	108211	109083	+	290	117	0	1	0	COG0583	NA	K	LysR family transcriptional regulator [Mycobacterium colombiense CECT 3035] gi|400330330|gb|EJO87828.1| LysR family transcriptional regulator [Mycobacterium colombiense CECT 3035]
M. shigaense_orf00153	109288	109133	-	51	95	0	0	0	NA	NA	NA	ribonuclease BN [Mycobacterium parascrofulaceum ATCC BAA-614] gi|295898248|gb|EFG77821.1| ribonuclease BN [Mycobacterium parascrofulaceum ATCC BAA-614]
M. shigaense_orf00154	109597	110625	+	342	106	0	0	0	NA	NA	NA	2-dehydropantoate 2-reductase [Mycobacterium thermoresistibile ATCC 19527] gi|356478340|gb|EHI11477.1| 2-dehydropantoate 2-reductase [Mycobacterium thermoresistibile ATCC 19527]
M. shigaense_orf00155	112480	112073	-	135	68	0	0	0	NA	NOG29102	S	hypothetical protein MCOL_V223393 [Mycobacterium colombiense CECT 3035] gi|400329406|gb|EJO86906.1| hypothetical protein MCOL_V223393 [Mycobacterium colombiense CECT 3035]
M. shigaense_orf00158	112559	113134	+	191	49	0	0	0	NA	NOG283664	NA	hypothetical protein MUL_4899 [Mycobacterium ulcerans Agy99] gi|443488671|ref|YP_007366818.1| TetR family transcriptional regulator [Mycobacterium liflandii 128FXT] gi|118572039|gb|ABL06790.1| conserved hypothetical protein [Mycobacterium ulcerans Ag ...
M. shigaense_orf00160	113121	113555	+	144	102	0	0	0	NA	NOG08247	S	hypothetical protein MCOL_V210895 [Mycobacterium colombiense CECT 3035] gi|400331252|gb|EJO88748.1| hypothetical protein MCOL_V210895 [Mycobacterium colombiense CECT 3035]
M. shigaense_orf00161	113672	114523	+	283	113	0	1	0	COG2141	NA	C	hypothetical protein MintA_05233 [Mycobacterium intracellulare ATCC 13950] gi|379747365|ref|YP_005338186.1| hypothetical protein OCU_26460 [Mycobacterium intracellulare ATCC 13950] gi|378799729|gb|AFC43865.1| hypothetical protein OCU_26460 [Mycobacte ...
M. shigaense_orf00163	115074	114520	-	184	79	0	0	0	COG3315	NA	Q	methyltransferase, putative, family protein [Mycobacterium colombiense CECT 3035] gi|400331227|gb|EJO88723.1| methyltransferase, putative, family protein [Mycobacterium colombiense CECT 3035]
M. shigaense_orf00165	115129	115482	+	117	82	1	0	0	NA	NA	NA	NA
M. shigaense_orf00166	116066	115491	-	191	69	0	0	0	NA	NOG116723	NA	conserved hypothetical protein [Mycobacterium parascrofulaceum ATCC BAA-614] gi|295897585|gb|EFG77179.1| conserved hypothetical protein [Mycobacterium parascrofulaceum ATCC BAA-614]
M. shigaense_orf00167	117520	116132	-	462	51	1	0	0	NA	NA	NA	drug resistance transporter, EmrB/QacA subfamily [Mycobacterium rhodesiae JS60] gi|353190650|gb|EHB56160.1| drug resistance transporter, EmrB/QacA subfamily [Mycobacterium rhodesiae JS60]
M. shigaense_orf00168	117646	118365	+	239	49	0	0	0	COG0494	NA	R,L	NUDIX hydrolase [Mycobacterium colombiense CECT 3035] gi|400331247|gb|EJO88743.1| NUDIX hydrolase [Mycobacterium colombiense CECT 3035]
M. shigaense_orf00169	119436	118366	-	356	58	0	0	0	COG2141	NA	C	F420-dependent methylene-tetrahydromethanopterin reductase [Mycobacterium rhodesiae NBB3] gi|359821997|gb|AEV74810.1| flavin-dependent oxidoreductase, F420-dependent methylene-tetrahydromethanopterin reductase [Mycobacterium rhodesiae NBB3]
M. shigaense_orf00170	120523	119492	-	343	57	1	0	0	NA	NA	NA	Catalase related subgroup domain-containing protein [Granulicella mallensis MP5ACTX8] gi|358752847|gb|AEU36237.1| Catalase related subgroup domain-containing protein [Granulicella mallensis MP5ACTX8]
M. shigaense_orf00171	120666	121469	+	267	43	1	0	0	COG2175	NA	Q	putative taurine catabolism dioxygenase [Frankia sp. QA3] gi|392286651|gb|EIV92675.1| putative taurine catabolism dioxygenase [Frankia sp. QA3]
M. shigaense_orf00172	121622	124552	+	976	44	1	0	0	COG1982	NA	E	arginine/lysine/ornithine decarboxylase [Mycobacterium colombiense CECT 3035] gi|400331250|gb|EJO88746.1| arginine/lysine/ornithine decarboxylase [Mycobacterium colombiense CECT 3035]
M. shigaense_orf00174	124588	124785	+	65	78	1	0	0	NA	NA	NA	NA
M. shigaense_orf00175	125056	125880	+	274	39	0	0	0	COG1116	NA	P	hypothetical protein MCOL_V210940 [Mycobacterium colombiense CECT 3035] gi|400331261|gb|EJO88757.1| hypothetical protein MCOL_V210940 [Mycobacterium colombiense CECT 3035]
M. shigaense_orf00176	125877	126842	+	321	39	0	0	0	COG0715	NA	P	sulfonate binding protein [Mycobacterium colombiense CECT 3035] gi|400331262|gb|EJO88758.1| sulfonate binding protein [Mycobacterium colombiense CECT 3035]
M. shigaense_orf00177	126902	127615	+	237	43	0	0	0	COG0600	NA	P	hypothetical protein MCOL_V210950 [Mycobacterium colombiense CECT 3035] gi|400331263|gb|EJO88759.1| hypothetical protein MCOL_V210950 [Mycobacterium colombiense CECT 3035]
M. shigaense_orf00178	127849	127616	-	77	44	1	0	0	NA	NA	NA	hypothetical protein Mflv_4440 [Mycobacterium gilvum PYR-GCK] gi|145217505|gb|ABP46909.1| conserved hypothetical protein [Mycobacterium gilvum PYR-GCK]
M. shigaense_orf00179	128019	128978	+	319	42	0	0	0	NA	NA	NA	hypothetical protein MCOL_V210955 [Mycobacterium colombiense CECT 3035] gi|400331264|gb|EJO88760.1| hypothetical protein MCOL_V210955 [Mycobacterium colombiense CECT 3035]
M. shigaense_orf00180	129948	128980	-	322	56	0	1	0	COG1052	NA	H,C,R	hypothetical protein W7U_22450 [Mycobacterium sp. H4Y] gi|442763568|gb|ELR81567.1| hypothetical protein W7U_22450 [Mycobacterium sp. H4Y]
M. shigaense_orf00181	130002	130862	+	286	59	1	0	0	NA	NA	NA	alpha/beta hydrolase [Mycobacterium colombiense CECT 3035] gi|400331051|gb|EJO88548.1| alpha/beta hydrolase [Mycobacterium colombiense CECT 3035]
M. shigaense_orf00182	132076	130859	-	405	51	0	1	0	COG4552	NA	R	hypothetical protein MCOL_V210960 [Mycobacterium colombiense CECT 3035] gi|400331265|gb|EJO88761.1| hypothetical protein MCOL_V210960 [Mycobacterium colombiense CECT 3035]
M. shigaense_orf00183	133298	132111	-	395	46	0	0	0	COG1960	NA	I	acyl-CoA dehydrogenase family protein [Mycobacterium smegmatis MKD8] gi|440626055|gb|ELQ87897.1| acyl-CoA dehydrogenase family protein [Mycobacterium smegmatis MKD8]
M. shigaense_orf00184	134653	133349	-	434	55	0	0	0	COG2141	NA	C	nitrilotriacetate monooxygenase component A [Mycobacterium fortuitum subsp. fortuitum DSM 46621] gi|403658410|gb|EJZ13144.1| nitrilotriacetate monooxygenase component A [Mycobacterium fortuitum subsp. fortuitum DSM 46621]
M. shigaense_orf00185	134753	135838	+	361	80	0	0	0	COG2141	NA	C	Alkanesulfonate monooxygenase [Mycobacterium tusciae JS617] gi|373548932|gb|EHP75610.1| Alkanesulfonate monooxygenase [Mycobacterium tusciae JS617]
M. shigaense_orf00188	136133	137302	+	389	182	0	0	0	COG2141	NA	C	fmnh2-utilizing oxygenase [Mycobacterium smegmatis str. MC2 155] gi|118169618|gb|ABK70514.1| fmnh2-utilizing oxygenase [Mycobacterium smegmatis str. MC2 155]
M. shigaense_orf00189	137321	138715	+	464	88	0	0	0	COG2141	NA	C	nitrilotriacetate monooxygenase component A [Mycobacterium smegmatis MKD8] gi|440628497|gb|ELQ90295.1| nitrilotriacetate monooxygenase component A [Mycobacterium smegmatis MKD8]
M. shigaense_orf00190	138721	139845	+	374	136	0	0	0	COG2141	NA	C	luciferase family oxidoreductase, group 1 [Frankia symbiont of Datisca glomerata] gi|334857478|gb|AEH07952.1| luciferase family oxidoreductase, group 1 [Frankia symbiont of Datisca glomerata]
M. shigaense_orf00192	141088	139877	-	403	92	0	0	0	COG1960	NA	I	acyl-CoA dehydrogenase FadE25_2 [Mycobacterium marinum M] gi|183173509|gb|ACC38619.1| acyl-CoA dehydrogenase FadE25_2 [Mycobacterium marinum M]
M. shigaense_orf00193	141871	142758	+	295	79	0	0	0	COG3588	NA	G	fructose-1,6-bisphosphate aldolase [Mycobacterium xenopi RIVM700367] gi|383330646|gb|EID09167.1| fructose-1,6-bisphosphate aldolase [Mycobacterium xenopi RIVM700367]
M. shigaense_orf00194	141750	141115	-	211	57	0	0	0	NA	NOG283023	NA	TetR family transcriptional regulator [Mycobacterium sp. MOTT36Y] gi|386787019|gb|AFJ33138.1| TetR family transcriptional regulator [Mycobacterium sp. MOTT36Y]
M. shigaense_orf00195	142812	143393	+	193	114	0	1	0	COG0243	NA	C	hypothetical protein MAP0367 [Mycobacterium avium subsp. paratuberculosis K-10] gi|118466615|ref|YP_879705.1| molybdopterin oxidoreductase Fe4S4 region [Mycobacterium avium 104] gi|417747650|ref|ZP_12396114.1| anaerobic dehydrogenase, typically selen ...
M. shigaense_orf00197	143463	146099	+	878	73	0	1	0	COG0243	NA	C	formate dehydrogenase, alpha subunit [Mycobacterium colombiense CECT 3035] gi|400331516|gb|EJO89012.1| formate dehydrogenase, alpha subunit [Mycobacterium colombiense CECT 3035]
M. shigaense_orf00198	146099	147073	+	324	75	0	1	0	COG0437	NA	C	hypothetical protein MAP0369 [Mycobacterium avium subsp. paratuberculosis K-10] gi|417747648|ref|ZP_12396112.1| Fe-S-cluster-containing hydrogenase subunit [Mycobacterium avium subsp. paratuberculosis S397] gi|41394816|gb|AAS02686.1| hypothetical pro ...
M. shigaense_orf00199	147070	148137	+	355	66	0	1	0	NA	NOG69880	S	polysulfide reductase [Mycobacterium colombiense CECT 3035] gi|400331518|gb|EJO89014.1| polysulfide reductase [Mycobacterium colombiense CECT 3035]
M. shigaense_orf00200	149116	148139	-	325	75	0	0	0	COG0709	NA	E	selenophosphate synthase [Mycobacterium chubuense NBB4] gi|390618726|gb|AFM19876.1| selenophosphate synthase [Mycobacterium chubuense NBB4]
M. shigaense_orf00202	149323	150642	+	439	74	0	0	0	COG1921	NA	E	L-seryl-tRNA(Sec) selenium transferase [Microlunatus phosphovorus NM-1] gi|334683963|dbj|BAK33548.1| L-seryl-tRNA(Sec) selenium transferase [Microlunatus phosphovorus NM-1]
M. shigaense_orf00205	150663	152456	+	597	54	0	0	0	COG3276	NA	J	selenocysteine-specific elongation factor SelB [Mycobacterium chubuense NBB4] gi|390618724|gb|AFM19874.1| selenocysteine-specific elongation factor SelB [Mycobacterium chubuense NBB4]
M. shigaense_orf00207	152474	153826	+	450	79	0	0	0	COG0642	NA	T	sensor histidine kinase [Mycobacterium parascrofulaceum ATCC BAA-614] gi|295897640|gb|EFG77233.1| sensor histidine kinase [Mycobacterium parascrofulaceum ATCC BAA-614]
M. shigaense_orf00208	154201	155679	+	492	686	0	0	0	COG0659	NA	P	carbonate dehydratase [Mycobacterium avium 104] gi|118165059|gb|ABK65956.1| carbonate dehydratase [Mycobacterium avium 104]
M. shigaense_orf00210	155742	156347	+	201	308	0	0	0	NA	NA	NA	putative menaquinone biosynthesis methyltransferase [Mycobacterium abscessus M94] gi|420936531|ref|ZP_15399800.1| putative menaquinone biosynthesis methyltransferase [Mycobacterium massiliense 1S-152-0914] gi|420947754|ref|ZP_15411004.1| putative men ...
M. shigaense_orf00212	156654	156373	-	93	259	0	0	0	NA	NOG42697	NA	conserved hypothetical protein [Mycobacterium parascrofulaceum ATCC BAA-614] gi|295897495|gb|EFG77094.1| conserved hypothetical protein [Mycobacterium parascrofulaceum ATCC BAA-614]
M. shigaense_orf00213	158179	156842	-	445	78	0	0	0	COG4638	NA	P,R	Rieske (2Fe-2S) domain protein [Mycobacterium parascrofulaceum ATCC BAA-614] gi|295897496|gb|EFG77095.1| Rieske (2Fe-2S) domain protein [Mycobacterium parascrofulaceum ATCC BAA-614]
M. shigaense_orf00214	159957	158197	-	586	81	0	0	0	COG3653	NA	Q	hypothetical protein MintA_05864 [Mycobacterium intracellulare ATCC 13950] gi|379749829|ref|YP_005340650.1| hypothetical protein OCU_51100 [Mycobacterium intracellulare ATCC 13950] gi|378802193|gb|AFC46329.1| hypothetical protein OCU_51100 [Mycobacte ...
M. shigaense_orf00216	160246	161370	+	374	57	0	1	0	COG0753	NA	P	catalase [Mycobacterium avium subsp. paratuberculosis S397] gi|336457356|gb|EGO36367.1| catalase [Mycobacterium avium subsp. paratuberculosis S397]
M. shigaense_orf00218	161415	161939	+	174	54	0	1	0	NA	NOG77046	C	cytochrome B561 [Mycobacterium smegmatis JS623] gi|433298098|gb|AGB23918.1| cytochrome B561 [Mycobacterium smegmatis JS623]
M. shigaense_orf00219	162976	161936	-	346	82	0	0	0	COG0657	NA	I	alpha/beta hydrolase domain-containing protein [Mycobacterium rhodesiae JS60] gi|353192892|gb|EHB58396.1| alpha/beta hydrolase domain-containing protein [Mycobacterium rhodesiae JS60]
M. shigaense_orf00220	163620	163024	-	198	169	0	0	0	COG1309	NA	K	hypothetical protein W7S_25595 [Mycobacterium sp. MOTT36Y] gi|386791949|gb|AFJ38068.1| hypothetical protein W7S_25595 [Mycobacterium sp. MOTT36Y]
M. shigaense_orf00222	163815	166040	+	741	72	0	1	0	COG1960	NA	I	hypothetical protein MCOL_V203660 [Mycobacterium colombiense CECT 3035] gi|400333801|gb|EJO91295.1| hypothetical protein MCOL_V203660 [Mycobacterium colombiense CECT 3035]
M. shigaense_orf00223	166049	167269	+	406	62	0	0	0	COG0183	NA	I	nonspecific lipid-transfer protein [Mycobacterium parascrofulaceum ATCC BAA-614] gi|295897435|gb|EFG77035.1| nonspecific lipid-transfer protein [Mycobacterium parascrofulaceum ATCC BAA-614]
M. shigaense_orf00224	167272	167688	+	138	91	0	0	0	COG1545	NOG115179;NOG70768	S,R	acyl dehydratase [Mycobacterium avium 104] gi|118164530|gb|ABK65427.1| acyl dehydratase [Mycobacterium avium 104]
M. shigaense_orf00225	168894	167710	-	394	69	0	0	0	NA	NOG42751	R	hypothetical protein MintA_05909 [Mycobacterium intracellulare ATCC 13950]
M. shigaense_orf00227	169967	168891	-	358	52	0	0	0	NA	NOG41005	S	hypothetical protein MaviaA2_23501 [Mycobacterium avium subsp. avium ATCC 25291]
M. shigaense_orf00228	169997	170596	+	199	49	0	0	0	NA	NOG277497;NOG244095	R	TetR family transcriptional regulator [Mycobacterium parascrofulaceum ATCC BAA-614] gi|295897432|gb|EFG77032.1| TetR family transcriptional regulator [Mycobacterium parascrofulaceum ATCC BAA-614]
M. shigaense_orf00229	170708	171622	+	304	63	0	0	0	NA	NA	NA	conserved hypothetical protein [Mycobacterium parascrofulaceum ATCC BAA-614] gi|295896563|gb|EFG76206.1| conserved hypothetical protein [Mycobacterium parascrofulaceum ATCC BAA-614]
M. shigaense_orf00230	172596	171619	-	325	76	0	1	0	COG1609	NA	K	transcriptional regulator, LacI family protein [Mycobacterium avium subsp. avium ATCC 25291]
M. shigaense_orf00231	172825	174174	+	449	61	0	1	0	NA	NOG86120	R	amidohydrolase 2 [Mycobacterium intracellulare ATCC 13950] gi|379757111|ref|YP_005345783.1| amidohydrolase 2 [Mycobacterium intracellulare MOTT-02] gi|378802176|gb|AFC46312.1| amidohydrolase 2 [Mycobacterium intracellulare ATCC 13950] gi|378807327|gb ...
M. shigaense_orf00233	174177	176516	+	779	64	0	0	0	COG1804	NA	C	caib/baif family protein [Mycobacterium avium 104] gi|118167445|gb|ABK68342.1| caib/baif family protein [Mycobacterium avium 104]
M. shigaense_orf00234	176529	176882	+	117	68	0	0	0	NA	NA	NA	hypothetical protein MCOL_V203630 [Mycobacterium colombiense CECT 3035] gi|400333795|gb|EJO91289.1| hypothetical protein MCOL_V203630 [Mycobacterium colombiense CECT 3035]
M. shigaense_orf00235	176931	178055	+	374	74	0	1	0	COG0183	NA	I	hypothetical protein OCQ_51960 [Mycobacterium intracellulare MOTT-64] gi|387878481|ref|YP_006308785.1| hypothetical protein W7S_25545 [Mycobacterium sp. MOTT36Y] gi|443308263|ref|ZP_21038049.1| hypothetical protein W7U_21505 [Mycobacterium sp. H4Y] g ...
M. shigaense_orf00236	178088	178474	+	128	86	0	1	0	COG1545	NOG145739	R	hypothetical protein MCOL_V203620 [Mycobacterium colombiense CECT 3035] gi|400333793|gb|EJO91287.1| hypothetical protein MCOL_V203620 [Mycobacterium colombiense CECT 3035]
M. shigaense_orf00238	180715	179063	-	550	97	0	0	0	COG0318	NA	I,Q	acyl-CoA synthetase [Mycobacterium colombiense CECT 3035] gi|400333791|gb|EJO91285.1| acyl-CoA synthetase [Mycobacterium colombiense CECT 3035]
M. shigaense_orf00239	181549	180779	-	256	108	0	0	0	COG1028	NA	I,Q,R	NAD dependent epimerase/dehydratase family protein [Mycobacterium colombiense CECT 3035] gi|400333790|gb|EJO91284.1| NAD dependent epimerase/dehydratase family protein [Mycobacterium colombiense CECT 3035]
M. shigaense_orf00240	182821	181991	-	276	365	0	0	0	COG0596	NA	R	alpha/beta hydrolase fold family hydrolase [Mycobacterium parascrofulaceum ATCC BAA-614] gi|295897447|gb|EFG77047.1| alpha/beta hydrolase fold family hydrolase [Mycobacterium parascrofulaceum ATCC BAA-614]
M. shigaense_orf00241	182888	183496	+	202	60	0	0	0	COG1309	NA	K	transcriptional regulatory protein [Mycobacterium marinum M] gi|183173583|gb|ACC38693.1| transcriptional regulatory protein [Mycobacterium marinum M]
M. shigaense_orf00243	184439	183714	-	241	93	0	0	0	NA	NA	NA	hypothetical protein O3I_040775 [Nocardia brasiliensis ATCC 700358] gi|407312199|gb|AFU06100.1| hypothetical protein O3I_040775 [Nocardia brasiliensis ATCC 700358]
M. shigaense_orf00244	185324	184497	-	275	142	0	0	0	COG0726	NA	G	polysaccharide deacetylase domain-containing protein [Mycobacterium avium subsp. avium ATCC 25291]
M. shigaense_orf00245	186899	185517	-	460	258	0	1	0	COG0627	NA	R	hypothetical protein W7U_21455 [Mycobacterium sp. H4Y] gi|442763369|gb|ELR81368.1| hypothetical protein W7U_21455 [Mycobacterium sp. H4Y]
M. shigaense_orf00248	189302	186972	-	776	896	0	0	0	COG2217	NA	P	cation transporter p-type ATPase CtpA_1 [Mycobacterium liflandii 128FXT] gi|442581198|gb|AGC60341.1| cation transporter p-type ATPase CtpA_1 [Mycobacterium liflandii 128FXT]
M. shigaense_orf00249	189470	189940	+	156	964	0	0	0	NA	NOG71536	S	hypothetical protein MAV_5243 [Mycobacterium avium 104] gi|118166712|gb|ABK67609.1| conserved hypothetical protein [Mycobacterium avium 104]
M. shigaense_orf00251	190507	189947	-	186	1933	0	0	0	NA	NA	NA	pyridoxamine 5'-phosphate oxidase [Mycobacterium sp. MOTT36Y] gi|386791918|gb|AFJ38037.1| pyridoxamine 5'-phosphate oxidase [Mycobacterium sp. MOTT36Y]
M. shigaense_orf00253	190674	191294	+	206	69	0	0	0	NA	NOG271735	NA	TetR family transcriptional regulator [Mycobacterium colombiense CECT 3035] gi|400333771|gb|EJO91265.1| TetR family transcriptional regulator [Mycobacterium colombiense CECT 3035]
M. shigaense_orf00254	192041	191358	-	227	46	0	0	0	NA	NA	NA	TetR family transcriptional regulator [Mycobacterium ulcerans Agy99] gi|118572023|gb|ABL06774.1| transcriptional regulatory protein (possibly TetR-family) [Mycobacterium ulcerans Agy99]
M. shigaense_orf00256	192131	192748	+	205	122	0	0	0	NA	NOG73426;NOG251246	K,S	TetR family transcriptional regulator [Mycobacterium ulcerans Agy99] gi|118572022|gb|ABL06773.1| transcriptional regulatory protein (possibly TetR-family) [Mycobacterium ulcerans Agy99]
M. shigaense_orf00257	192802	194610	+	602	62	0	0	0	COG2072	NA	P	monooxygenase [Mycobacterium marinum M] gi|183173598|gb|ACC38708.1| monooxygenase [Mycobacterium marinum M]
M. shigaense_orf00259	194607	196172	+	521	66	0	0	0	COG2072	NA	P	monoooxygenase [Mycobacterium marinum M] gi|183173599|gb|ACC38709.1| monoooxygenase [Mycobacterium marinum M]
M. shigaense_orf00260	197601	196201	-	466	64	0	0	0	NA	NA	NA	hypothetical protein AS9A_1107 [Amycolicicoccus subflavus DQS3-9A1] gi|333480999|gb|AEF39559.1| hypothetical protein AS9A_1107 [Amycolicicoccus subflavus DQS3-9A1]
M. shigaense_orf00261	197707	198822	+	371	51	0	0	0	COG1613	NA	P	Sulfate ABC transporter, periplasmic protein [Mycobacterium colombiense CECT 3035] gi|400333765|gb|EJO91259.1| Sulfate ABC transporter, periplasmic protein [Mycobacterium colombiense CECT 3035]
M. shigaense_orf00263	198839	200614	+	591	63	0	0	0	COG0659	NA	P	putative sulfate transporter [Mycobacterium colombiense CECT 3035] gi|400333764|gb|EJO91258.1| putative sulfate transporter [Mycobacterium colombiense CECT 3035]
M. shigaense_orf00264	201438	200611	-	275	103	0	0	0	COG1028	NA	I,Q,R	short chain dehydrogenase [Mycobacterium colombiense CECT 3035] gi|400333763|gb|EJO91257.1| short chain dehydrogenase [Mycobacterium colombiense CECT 3035]
M. shigaense_orf00265	202657	201473	-	394	71	0	0	0	COG0530	NA	P	sodium/calcium exchanger family protein [Mycobacterium colombiense CECT 3035] gi|400333762|gb|EJO91256.1| sodium/calcium exchanger family protein [Mycobacterium colombiense CECT 3035]
M. shigaense_orf00266	202650	202811	+	53	90	1	0	0	NA	NA	NA	NA
M. shigaense_orf00267	203747	203196	-	183	47	0	0	0	NA	NA	NA	4-carboxymuconolactone decarboxylase [Mycobacterium parascrofulaceum ATCC BAA-614] gi|295897411|gb|EFG77012.1| 4-carboxymuconolactone decarboxylase [Mycobacterium parascrofulaceum ATCC BAA-614]
M. shigaense_orf00268	203878	204834	+	318	51	0	0	0	COG0583	NA	K	LysR-family transcriptional regulator [Mycobacterium parascrofulaceum ATCC BAA-614] gi|295897412|gb|EFG77013.1| LysR-family transcriptional regulator [Mycobacterium parascrofulaceum ATCC BAA-614]
M. shigaense_orf00270	204925	206331	+	468	46	0	0	0	NA	NA	NA	mmgE/PrpD family protein [Mycobacterium sp. MOTT36Y] gi|443308233|ref|ZP_21038019.1| mmgE/PrpD family protein [Mycobacterium sp. H4Y] gi|386791905|gb|AFJ38024.1| mmgE/PrpD family protein [Mycobacterium sp. MOTT36Y] gi|442763349|gb|ELR81348.1| mmgE/Pr ...
M. shigaense_orf00272	206384	207148	+	254	82	0	0	0	COG3305	NA	S	hypothetical protein OCO_50670 [Mycobacterium intracellulare MOTT-02] gi|378807294|gb|AFC51429.1| hypothetical protein OCO_50670 [Mycobacterium intracellulare MOTT-02]
M. shigaense_orf00273	207755	207153	-	200	148	0	0	0	NA	NOG70835	S	hypothetical protein MCOL_V203430 [Mycobacterium colombiense CECT 3035] gi|400333755|gb|EJO91249.1| hypothetical protein MCOL_V203430 [Mycobacterium colombiense CECT 3035]
M. shigaense_orf00274	207938	208102	+	54	302	0	0	0	NA	NA	NA	Conserved protein of unknown function [Mycobacterium canettii CIPT 140070017] gi|432164703|emb|CCK62165.1| Conserved protein of unknown function [Mycobacterium canettii CIPT 140070017]
M. shigaense_orf00275	208159	208476	+	105	335	0	0	0	NA	NA	NA	methylthioadenosine nucleosidase [Mycobacterium smegmatis JS623] gi|433297545|gb|AGB23365.1| methylthioadenosine nucleosidase [Mycobacterium smegmatis JS623]
M. shigaense_orf00276	208466	208594	+	42	379	0	0	0	NA	NA	NA	bifunctional Mta/Sah nucleosidase Mtn [Mycobacterium ulcerans Agy99] gi|118572011|gb|ABL06762.1| bifunctional Mta/Sah nucleosidase Mtn [Mycobacterium ulcerans Agy99]
M. shigaense_orf00277	209117	208548	-	189	335	0	0	0	NA	NA	NA	hypothetical protein MintA_11516 [Mycobacterium intracellulare ATCC 13950] gi|379749773|ref|YP_005340594.1| hypothetical protein OCU_50540 [Mycobacterium intracellulare ATCC 13950] gi|379757072|ref|YP_005345744.1| hypothetical protein OCO_50610 [Myco ...
M. shigaense_orf00278	209267	209956	+	229	83	0	0	0	COG1028	NA	I,Q,R	oxidoreductase [Mycobacterium parascrofulaceum ATCC BAA-614] gi|295897419|gb|EFG77020.1| oxidoreductase [Mycobacterium parascrofulaceum ATCC BAA-614]
M. shigaense_orf00280	210034	210489	+	151	85	0	0	0	NA	NOG130002	NA	hypothetical protein MAV_5230 [Mycobacterium avium 104] gi|118168562|gb|ABK69459.1| conserved hypothetical protein [Mycobacterium avium 104]
M. shigaense_orf00281	210501	211307	+	268	75	0	0	0	COG0300	NA	R	ketoacyl reductase [Mycobacterium ulcerans Agy99] gi|118572009|gb|ABL06760.1| ketoacyl reductase [Mycobacterium ulcerans Agy99]
M. shigaense_orf00283	212044	211304	-	246	80	0	0	0	COG2226	NA	H	methyltransferase type 11 [Mycobacterium avium subsp. avium ATCC 25291]
M. shigaense_orf00284	212885	212268	-	205	125	0	0	0	COG1309	NOG73426	K	TetR-family protein transcriptional regulator [Mycobacterium parascrofulaceum ATCC BAA-614] gi|295897423|gb|EFG77024.1| TetR-family protein transcriptional regulator [Mycobacterium parascrofulaceum ATCC BAA-614]
M. shigaense_orf00286	212968	213921	+	317	820	0	0	0	COG3662	NA	S	hypothetical protein MCOL_V203385 [Mycobacterium colombiense CECT 3035] gi|400333746|gb|EJO91240.1| hypothetical protein MCOL_V203385 [Mycobacterium colombiense CECT 3035]
M. shigaense_orf00287	214049	213930	-	39	365	0	0	0	NA	NA	NA	NA
M. shigaense_orf00288	214173	215264	+	363	260	0	0	0	NA	NOG46554	S	hypothetical protein MCOL_V203375 [Mycobacterium colombiense CECT 3035] gi|400333744|gb|EJO91238.1| hypothetical protein MCOL_V203375 [Mycobacterium colombiense CECT 3035]
M. shigaense_orf00290	215266	216663	+	465	100	0	1	0	NA	NOG82889	S	hypothetical protein MCOL_V203370 [Mycobacterium colombiense CECT 3035] gi|400333743|gb|EJO91237.1| hypothetical protein MCOL_V203370 [Mycobacterium colombiense CECT 3035]
M. shigaense_orf00291	216908	216660	-	82	63	0	0	0	COG0238	NA	J	ribosomal protein S18 RpsR2 [Mycobacterium liflandii 128FXT] gi|442581245|gb|AGC60388.1| ribosomal protein S18 RpsR2 [Mycobacterium liflandii 128FXT]
M. shigaense_orf00292	217213	216908	-	101	101	0	0	0	COG0199	NA	J	30S ribosomal protein S14 [Mycobacterium intracellulare ATCC 13950] gi|379756797|ref|YP_005345469.1| 30S ribosomal protein S14 [Mycobacterium intracellulare MOTT-02] gi|379764322|ref|YP_005350719.1| 30S ribosomal protein S14 [Mycobacterium intracellu ...
M. shigaense_orf00293	217377	217213	-	54	97	0	0	0	COG0267	NA	J	50S ribosomal protein L33 [Mycobacterium avium subsp. paratuberculosis K-10] gi|417748280|ref|ZP_12396725.1| ribosomal protein L33 [Mycobacterium avium subsp. paratuberculosis S397] gi|440779222|ref|ZP_20957952.1| 50S ribosomal protein L33 [Mycobacte ...
M. shigaense_orf00294	217580	217377	-	67	82	0	0	0	COG0227	NA	J	ribosomal protein L28 [Mycobacterium avium subsp. avium ATCC 25291]
M. shigaense_orf00295	217738	218922	+	394	201	0	0	0	COG0523	NA	R	hypothetical protein MMAR_0293 [Mycobacterium marinum M] gi|183173650|gb|ACC38760.1| conserved protein [Mycobacterium marinum M]
M. shigaense_orf00298	223763	218958	-	1601	216	0	0	0	COG0474	NA	P	ATPase P [Mycobacterium avium 104] gi|118164947|gb|ABK65844.1| ATPase, P-type (transporting), HAD superfamily protein, subfamily protein IC [Mycobacterium avium 104]
M. shigaense_orf00301	224489	223947	-	180	63	0	0	0	NA	NA	NA	RNA polymerase factor sigma-70 [Mycobacterium colombiense CECT 3035] gi|400333738|gb|EJO91232.1| RNA polymerase factor sigma-70 [Mycobacterium colombiense CECT 3035]
M. shigaense_orf00302	224853	224629	-	74	121	0	0	0	NA	NOG42450	NA	hypothetical protein MCOL_V203330 [Mycobacterium colombiense CECT 3035] gi|400333735|gb|EJO91229.1| hypothetical protein MCOL_V203330 [Mycobacterium colombiense CECT 3035]
M. shigaense_orf00303	225023	225301	+	92	63	0	0	0	NA	NA	NA	Conserved protein of unknown function (part2) [Mycobacterium canettii CIPT 140070010] gi|432162721|emb|CCK60104.1| Conserved protein of unknown function (part2) [Mycobacterium canettii CIPT 140070010]
M. shigaense_orf00304	225850	225497	-	117	55	0	0	0	NA	NA	NA	hypothetical protein MCOL_V203325 [Mycobacterium colombiense CECT 3035] gi|400333734|gb|EJO91228.1| hypothetical protein MCOL_V203325 [Mycobacterium colombiense CECT 3035]
M. shigaense_orf00306	225937	226416	+	159	52	0	0	0	NA	NOG291750	NA	hypothetical protein OCU_50370 [Mycobacterium intracellulare ATCC 13950] gi|378802120|gb|AFC46256.1| hypothetical protein OCU_50370 [Mycobacterium intracellulare ATCC 13950]
M. shigaense_orf00307	226413	227573	+	386	52	0	0	0	COG1062	NA	C	adhD [Mycobacterium colombiense CECT 3035] gi|400333732|gb|EJO91226.1| adhD [Mycobacterium colombiense CECT 3035]
M. shigaense_orf00310	228363	227590	-	257	48	0	0	0	COG1028	NA	I,Q,R	hypothetical protein W7S_25240 [Mycobacterium sp. MOTT36Y] gi|443308204|ref|ZP_21037991.1| hypothetical protein W7U_21195 [Mycobacterium sp. H4Y] gi|386791878|gb|AFJ37997.1| hypothetical protein W7S_25240 [Mycobacterium sp. MOTT36Y] gi|442765572|gb|E ...
M. shigaense_orf00312	229981	228365	-	538	42	0	1	0	COG0318	NA	I,Q	AMP-binding protein [Mycobacterium colombiense CECT 3035] gi|400333729|gb|EJO91223.1| AMP-binding protein [Mycobacterium colombiense CECT 3035]
M. shigaense_orf00315	230732	229992	-	246	83	0	0	0	COG2188	NA	K	hypothetical protein MintA_23009 [Mycobacterium intracellulare ATCC 13950] gi|379749751|ref|YP_005340572.1| hypothetical protein OCU_50320 [Mycobacterium intracellulare ATCC 13950] gi|379757050|ref|YP_005345722.1| hypothetical protein OCO_50390 [Myco ...
M. shigaense_orf00317	232360	230732	-	542	96	0	0	0	COG3391	NOG84358;NOG150963	S	hypothetical protein MCOL_V203290 [Mycobacterium colombiense CECT 3035] gi|400333727|gb|EJO91221.1| hypothetical protein MCOL_V203290 [Mycobacterium colombiense CECT 3035]
M. shigaense_orf00319	232576	233421	+	281	82	0	0	0	COG1028	NA	I,Q,R	short chain dehydrogenase/reductase family oxidoreductase [Mycobacterium sp. MOTT36Y] gi|386791874|gb|AFJ37993.1| short chain dehydrogenase/reductase family oxidoreductase [Mycobacterium sp. MOTT36Y]
M. shigaense_orf00320	233421	234797	+	458	59	0	0	0	COG4638	NA	P,R	hypothetical protein W7U_21170 [Mycobacterium sp. H4Y] gi|442765567|gb|ELR83565.1| hypothetical protein W7U_21170 [Mycobacterium sp. H4Y]
M. shigaense_orf00324	234794	236650	+	618	48	0	0	0	COG2072	NA	P	FAD dependent oxidoreductase [Mycobacterium colombiense CECT 3035] gi|400333724|gb|EJO91218.1| FAD dependent oxidoreductase [Mycobacterium colombiense CECT 3035]
M. shigaense_orf00326	236647	237582	+	311	44	0	0	0	COG1028	NA	I,Q,R	short chain dehydrogenase/reductase family oxidoreductase [Mycobacterium sp. H4Y] gi|442765565|gb|ELR83563.1| short chain dehydrogenase/reductase family oxidoreductase [Mycobacterium sp. H4Y]
M. shigaense_orf00328	237611	238783	+	390	47	0	0	0	COG1804	NA	C	III family CAIB/BAIF CoA-transferase [Mycobacterium parascrofulaceum ATCC BAA-614] gi|295897374|gb|EFG76977.1| III family CAIB/BAIF CoA-transferase [Mycobacterium parascrofulaceum ATCC BAA-614]
M. shigaense_orf00330	238786	240498	+	570	50	0	0	0	COG0028	NA	H,E	thiamine pyrophosphate enzyme, central region [Mycobacterium sp. MOTT36Y] gi|443308195|ref|ZP_21037982.1| thiamine pyrophosphate enzyme, central region [Mycobacterium sp. H4Y] gi|386791869|gb|AFJ37988.1| thiamine pyrophosphate enzyme, central region ...
M. shigaense_orf00333	240514	241944	+	476	75	0	0	0	COG1012	NA	C	aldehyde dehydrogenase [Mycobacterium indicus pranii MTCC 9506] gi|405131857|gb|AFS17112.1| Putative aldehyde dehydrogenase [Mycobacterium indicus pranii MTCC 9506]
M. shigaense_orf00334	242184	244187	+	667	83	0	0	0	COG1835	NA	I	putative acyltransferase [Mycobacterium sp. H4Y] gi|442765560|gb|ELR83558.1| putative acyltransferase [Mycobacterium sp. H4Y]
M. shigaense_orf00335	244850	244191	-	219	134	0	1	0	COG4122	NA	R	O-methyltransferase, family protein 3 [Mycobacterium colombiense CECT 3035] gi|400333718|gb|EJO91212.1| O-methyltransferase, family protein 3 [Mycobacterium colombiense CECT 3035]
M. shigaense_orf00336	245387	245602	+	71	355	0	0	0	NA	NA	NA	hypothetical protein MAP3516 [Mycobacterium avium subsp. paratuberculosis K-10] gi|41398445|gb|AAS06066.1| hypothetical protein MAP_3516 [Mycobacterium avium subsp. paratuberculosis K-10]
M. shigaense_orf00337	245748	247454	+	568	157	0	0	0	COG1914	NA	P	hypothetical protein MCOL_V203235 [Mycobacterium colombiense CECT 3035] gi|400333716|gb|EJO91210.1| hypothetical protein MCOL_V203235 [Mycobacterium colombiense CECT 3035]
M. shigaense_orf00338	248396	247434	-	320	136	0	0	0	COG0604	NA	C,R	zinc-binding dehydrogenase [Mycobacterium colombiense CECT 3035] gi|400333715|gb|EJO91209.1| zinc-binding dehydrogenase [Mycobacterium colombiense CECT 3035]
M. shigaense_orf00341	248490	249095	+	201	70	0	0	0	NA	NA	NA	hypothetical protein OCQ_51240 [Mycobacterium intracellulare MOTT-64] gi|378812501|gb|AFC56635.1| hypothetical protein OCQ_51240 [Mycobacterium intracellulare MOTT-64]
M. shigaense_orf00343	252680	249105	-	1191	77	0	0	0	COG3320;COG1022	NA	Q,I	putative long-chain fatty-acid--CoA ligase [Mycobacterium colombiense CECT 3035] gi|400333713|gb|EJO91207.1| putative long-chain fatty-acid--CoA ligase [Mycobacterium colombiense CECT 3035]
M. shigaense_orf00344	253583	252843	-	246	155	0	0	0	COG1376	NA	S	hypothetical protein MaviaA2_23116 [Mycobacterium avium subsp. avium ATCC 25291]
M. shigaense_orf00345	253773	254426	+	217	64	0	0	0	COG1335	NA	Q	isochorismatase [Mycobacterium avium 104] gi|118168057|gb|ABK68954.1| isochorismatase family protein [Mycobacterium avium 104]
M. shigaense_orf00346	254480	255412	+	310	68	0	0	0	COG0583	NA	K	LysR family transcriptional regulator [Mycobacterium leprae TN] gi|221230912|ref|YP_002504328.1| LysR family transcriptional regulator [Mycobacterium leprae Br4923] gi|4200252|emb|CAA22900.1| putative LysR-type transcriptional regulator [Mycobacteriu ...
M. shigaense_orf00349	257105	255396	-	569	50	0	0	0	COG0028	NA	H,E	oxalyl-CoA decarboxylase [Mycobacterium avium subsp. paratuberculosis S5] gi|436720487|gb|ELP44734.1| oxalyl-CoA decarboxylase [Mycobacterium avium subsp. paratuberculosis S5]
M. shigaense_orf00350	257302	257141	-	53	58	1	0	0	NA	NA	NA	NA
M. shigaense_orf00351	257354	258928	+	524	79	0	0	0	COG0318	NA	I,Q	acyl-CoA synthetase [Mycobacterium intracellulare MOTT-64] gi|406033301|ref|YP_006732193.1| acyl-CoA synthetase [Mycobacterium indicus pranii MTCC 9506] gi|443308182|ref|ZP_21037969.1| acyl-CoA synthetase [Mycobacterium sp. H4Y] gi|378812496|gb|AFC56 ...
M. shigaense_orf00352	259412	258939	-	157	54	0	0	0	NA	NA	NA	hypothetical protein MMAR_0320 [Mycobacterium marinum M] gi|183173677|gb|ACC38787.1| conserved hypothetical membrane protein [Mycobacterium marinum M]
M. shigaense_orf00354	261614	259455	-	719	67	0	0	0	COG0480	NA	J	elongation factor G [Mycobacterium intracellulare ATCC 13950]
M. shigaense_orf00355	262180	261728	-	150	65	0	0	0	NA	NOG47579	R	pyridoxamine 5'-phosphate oxidase family protein [Mycobacterium colombiense CECT 3035] gi|400333707|gb|EJO91201.1| pyridoxamine 5'-phosphate oxidase family protein [Mycobacterium colombiense CECT 3035]
M. shigaense_orf00357	262305	263330	+	341	88	0	1	0	COG0265	NA	O	serine protease PepA [Mycobacterium parascrofulaceum ATCC BAA-614] gi|295897235|gb|EFG76839.1| serine protease PepA [Mycobacterium parascrofulaceum ATCC BAA-614]
M. shigaense_orf00358	263431	265215	+	594	82	0	0	0	COG0366	NA	G	trehalose synthase [Mycobacterium colombiense CECT 3035] gi|400333705|gb|EJO91199.1| trehalose synthase [Mycobacterium colombiense CECT 3035]
M. shigaense_orf00360	265289	266641	+	450	81	0	0	0	COG3281	NA	G	Pep2 protein [Mycobacterium parascrofulaceum ATCC BAA-614] gi|295897237|gb|EFG76841.1| Pep2 protein [Mycobacterium parascrofulaceum ATCC BAA-614]
M. shigaense_orf00361	266672	267358	+	228	66	0	0	0	COG3619	NA	S	putative membrane protein [Mycobacterium avium subsp. paratuberculosis S397] gi|336459935|gb|EGO38847.1| putative membrane protein [Mycobacterium avium subsp. paratuberculosis S397]
M. shigaense_orf00362	267405	268481	+	358	436	0	0	0	COG2801	NA	L	integrase catalytic subunit [Mycobacterium sp. MCS] gi|108769040|gb|ABG07762.1| Integrase, catalytic region [Mycobacterium sp. MCS]
M. shigaense_orf00363	269574	268546	-	342	237	0	0	0	COG0627	NA	R	antigen 85-C [Mycobacterium avium subsp. avium ATCC 25291] gi|13431273|sp|O52972.1|A85C_MYCAV RecName: Full=Diacylglycerol acyltransferase/mycolyltransferase Ag85C; Short=DGAT; AltName: Full=Acyl-CoA:diacylglycerol acyltransferase; AltName: Full=Anti ...
M. shigaense_orf00364	269705	269845	+	46	37	1	0	0	NA	NA	NA	NA
M. shigaense_orf00366	270580	269822	-	252	39	0	0	0	COG0842	NA	V	drug ABC transporter membrane protein [Mycobacterium colombiense CECT 3035] gi|400333701|gb|EJO91195.1| drug ABC transporter membrane protein [Mycobacterium colombiense CECT 3035]
M. shigaense_orf00367	271457	270630	-	275	52	0	0	0	COG1131	NA	V	daunorubicin resistance ABC transporter ATPase subunit [Mycobacterium avium subsp. avium ATCC 25291]
M. shigaense_orf00368	271912	271454	-	152	44	0	0	0	NA	NOG151133	NA	MarR family transcriptional regulator [Mycobacterium colombiense CECT 3035] gi|400333699|gb|EJO91193.1| MarR family transcriptional regulator [Mycobacterium colombiense CECT 3035]
M. shigaense_orf00369	272466	271969	-	165	56	0	0	0	COG0622	NA	R	hypothetical protein MintA_20836 [Mycobacterium intracellulare ATCC 13950] gi|379749721|ref|YP_005340542.1| hypothetical protein OCU_50020 [Mycobacterium intracellulare ATCC 13950] gi|387878388|ref|YP_006308692.1| hypothetical protein W7S_25080 [Myco ...
M. shigaense_orf00370	272502	272957	+	151	58	0	0	0	COG2030	NA	I	hypothetical protein MAP3538 [Mycobacterium avium subsp. paratuberculosis K-10] gi|118464936|ref|YP_884291.1| ZbpA protein [Mycobacterium avium 104] gi|417748552|ref|ZP_12396989.1| acyl dehydratase [Mycobacterium avium subsp. paratuberculosis S397] g ...
M. shigaense_orf00371	272962	273243	+	93	57	1	0	0	NA	NA	NA	hypothetical protein MSMEG_0050 [Mycobacterium smegmatis str. MC2 155] gi|399984481|ref|YP_006564829.1| hypothetical protein MSMEI_0052 [Mycobacterium smegmatis str. MC2 155] gi|441201455|ref|ZP_20970852.1| hypothetical protein D806_0051 [Mycobacteri ...
M. shigaense_orf00372	274579	273287	-	430	77	0	0	0	COG1960	NA	I	acyl-CoA dehydrogenase [Mycobacterium colombiense CECT 3035] gi|400333689|gb|EJO91183.1| acyl-CoA dehydrogenase [Mycobacterium colombiense CECT 3035]
M. shigaense_orf00373	275837	276442	+	201	148	0	0	0	COG0454	NA	K,R	acetyltransferase [Mycobacterium parascrofulaceum ATCC BAA-614] gi|295897256|gb|EFG76860.1| acetyltransferase [Mycobacterium parascrofulaceum ATCC BAA-614]
M. shigaense_orf00374	275794	274697	-	365	72	0	0	0	COG2141	NA	C	5,10-methylene tetra hydromethanopterin reductase [Mycobacterium indicus pranii MTCC 9506] gi|405131828|gb|AFS17083.1| 5,10-methylene tetra hydromethanopterin reductase [Mycobacterium indicus pranii MTCC 9506]
M. shigaense_orf00375	277124	276453	-	223	400	0	0	0	COG1309	NA	K	TetR family transcriptional regulator [Mycobacterium colombiense CECT 3035] gi|400333684|gb|EJO91178.1| TetR family transcriptional regulator [Mycobacterium colombiense CECT 3035]
M. shigaense_orf00376	277195	278286	+	363	142	0	0	0	COG1018	NA	C	hypothetical protein MAP3545 [Mycobacterium avium subsp. paratuberculosis K-10] gi|417748545|ref|ZP_12396982.1| flavodoxin reductase family protein [Mycobacterium avium subsp. paratuberculosis S397] gi|440779036|ref|ZP_20957773.1| hypothetical protei ...
M. shigaense_orf00377	278293	279441	+	382	207	0	0	0	COG3239	NA	I	fatty acid desaturase [Mycobacterium colombiense CECT 3035] gi|400333682|gb|EJO91176.1| fatty acid desaturase [Mycobacterium colombiense CECT 3035]
M. shigaense_orf00378	279507	279887	+	126	192	0	0	0	NA	NA	NA	5,10-methylene tetrahydro methanopterin reductase [Mycobacterium indicus pranii MTCC 9506] gi|405131821|gb|AFS17076.1| 5,10-methylene tetrahydro methanopterin reductase [Mycobacterium indicus pranii MTCC 9506]
M. shigaense_orf00380	279842	280135	+	97	190	0	0	0	NA	NA	NA	conserved hypothetical protein [Mycobacterium parascrofulaceum ATCC BAA-614] gi|295896454|gb|EFG76105.1| conserved hypothetical protein [Mycobacterium parascrofulaceum ATCC BAA-614]
M. shigaense_orf00381	281251	280139	-	370	138	0	0	0	NA	NOG41005	S	hypothetical protein MAP3547c [Mycobacterium avium subsp. paratuberculosis K-10] gi|417748543|ref|ZP_12396980.1| Protein of unknown function (DUF1214) [Mycobacterium avium subsp. paratuberculosis S397] gi|440779037|ref|ZP_20957774.1| hypothetical pro ...
M. shigaense_orf00383	281835	281248	-	195	166	0	0	0	COG1309	NOG284788	K	TetR family transcriptional regulator [Mycobacterium parascrofulaceum ATCC BAA-614] gi|295897264|gb|EFG76868.1| TetR family transcriptional regulator [Mycobacterium parascrofulaceum ATCC BAA-614]
M. shigaense_orf00385	281864	283099	+	411	76	0	0	0	NA	NOG42751;NOG136945	R	hypothetical protein MAV_5164 [Mycobacterium avium 104] gi|118166135|gb|ABK67032.1| conserved hypothetical protein [Mycobacterium avium 104]
M. shigaense_orf00386	283260	283598	+	112	63	0	0	0	NA	NA	NA	hypothetical protein W7S_12390 [Mycobacterium sp. MOTT36Y] gi|443305575|ref|ZP_21035363.1| hypothetical protein W7U_07890 [Mycobacterium sp. H4Y] gi|386789324|gb|AFJ35443.1| hypothetical protein W7S_12390 [Mycobacterium sp. MOTT36Y] gi|442767139|gb|E ...
M. shigaense_orf00388	283627	283914	+	95	51	0	0	0	NA	NA	NA	hypothetical protein MCOL_V208630 [Mycobacterium colombiense CECT 3035] gi|400332746|gb|EJO90241.1| hypothetical protein MCOL_V208630 [Mycobacterium colombiense CECT 3035]
M. shigaense_orf00389	284446	285780	+	444	348	1	0	0	NA	NA	NA	putative carbon compunds degradation-like protein, partial [Pseudomonas syringae pv. pisi str. 1704B] gi|330941020|gb|EGH43942.1| putative carbon compunds degradation-like protein [Pseudomonas syringae pv. pisi str. 1704B]
M. shigaense_orf00391	286619	286044	-	191	220	1	0	0	NA	NA	NA	transcriptional regulator, GntR family [Campylobacter gracilis RM3268] gi|257442671|gb|EEV17808.1| transcriptional regulator, GntR family [Campylobacter gracilis RM3268]
M. shigaense_orf00392	287559	287714	+	51	35	1	0	0	NA	NA	NA	NA
M. shigaense_orf00393	287809	288066	+	85	228	1	0	0	NA	NA	NA	hypothetical protein MA5S1215_4835 [Mycobacterium abscessus 5S-1215] gi|420878844|ref|ZP_15342211.1| hypothetical protein MA5S0304_1788 [Mycobacterium abscessus 5S-0304] gi|420883628|ref|ZP_15346989.1| hypothetical protein MA5S0421_2041 [Mycobacteriu ...
M. shigaense_orf00395	288108	292661	+	1517	77	1	0	0	NA	NA	NA	modular polyketide synthase [Mycobacterium abscessus 5S-1215] gi|420879429|ref|ZP_15342796.1| modular polyketide synthase [Mycobacterium abscessus 5S-0304] gi|420883603|ref|ZP_15346964.1| modular polyketide synthase [Mycobacterium abscessus 5S-0421] ...
M. shigaense_orf00396	292685	294415	+	576	59	1	0	0	NA	NA	NA	AMP-binding enzyme [Mycobacterium abscessus subsp. bolletii BD] gi|363998398|gb|EHM19605.1| AMP-binding enzyme [Mycobacterium abscessus subsp. bolletii BD]
M. shigaense_orf00397	294442	294870	+	142	90	0	0	0	NA	NA	NA	Probable conserved membrane protein, MmpS [Mycobacterium abscessus] gi|419707870|ref|ZP_14235342.1| membrane protein MmpS [Mycobacterium abscessus M93] gi|419715653|ref|ZP_14243054.1| membrane protein MmpS [Mycobacterium abscessus M94] gi|420861801|r ...
M. shigaense_orf00399	294867	297923	+	1018	70	0	0	0	COG2409	NA	R	Putative membrane protein, MmpL [Mycobacterium abscessus] gi|419707871|ref|ZP_14235343.1| putative membrane protein MmpL [Mycobacterium abscessus M93] gi|419715652|ref|ZP_14243053.1| putative membrane protein MmpL [Mycobacterium abscessus M94] gi|420 ...
M. shigaense_orf00400	297967	298335	+	122	94	1	0	0	NA	NA	NA	hypothetical protein [Burkholderia glumae BGR1] gi|237879938|gb|ACR32270.1| Hypothetical protein bglu_2g19460 [Burkholderia glumae BGR1]
M. shigaense_orf00402	298512	298357	-	51	126	1	0	0	NA	NA	NA	NA
M. shigaense_orf00403	298778	298635	-	47	109	1	0	0	NA	NA	NA	NA
M. shigaense_orf00404	299845	299000	-	281	111	1	0	0	NA	NA	NA	putative TIM-barrel fold metal-dependent hydrolase [Acidovorax sp. CF316] gi|394313090|gb|EJE50171.1| putative TIM-barrel fold metal-dependent hydrolase [Acidovorax sp. CF316]
M. shigaense_orf00406	300848	300036	-	270	161	0	0	0	NA	NA	NA	3-hydroxyisobutyrate dehydrogenase protein [uncultured bacterium CSL12]
M. shigaense_orf00407	301133	301011	-	40	245	1	0	0	NA	NA	NA	NA
M. shigaense_orf00409	301492	301373	-	39	484	1	0	0	NA	NA	NA	NA
M. shigaense_orf00411	302573	302746	+	57	1382	1	0	0	NA	NA	NA	NA
M. shigaense_orf00413	302934	303581	+	215	382	0	0	0	COG0605	NA	P	superoxide dismutase soda1 [Rhodococcus equi 103S] gi|311886988|emb|CBH46297.1| superoxide dismutase SodA1 [Rhodococcus equi 103S]
M. shigaense_orf00414	304051	304944	+	297	148	0	0	0	COG0596	NA	R	alpha/beta hydrolase [Mycobacterium intracellulare MOTT-64] gi|387878370|ref|YP_006308674.1| alpha/beta hydrolase [Mycobacterium sp. MOTT36Y] gi|406033272|ref|YP_006732164.1| AB hydrolase superfamily protein yfhM [Mycobacterium indicus pranii MTCC 95 ...
M. shigaense_orf00415	305157	304945	-	70	86	0	0	0	COG3585	NOG146003;NOG224693	H,S	molybdopterin-binding protein [Mycobacterium parascrofulaceum ATCC BAA-614] gi|295897268|gb|EFG76872.1| molybdopterin-binding protein [Mycobacterium parascrofulaceum ATCC BAA-614]
M. shigaense_orf00416	305817	305194	-	207	106	0	0	0	COG1309	NA	K	TetR family transcriptional regulator [Mycobacterium intracellulare ATCC 13950] gi|378802065|gb|AFC46201.1| transcriptional regulator, TetR family protein [Mycobacterium intracellulare ATCC 13950]
M. shigaense_orf00417	305949	307268	+	439	157	0	0	0	COG2124	NA	Q	cytochrome P450 monooxygenase [Mycobacterium avium 104] gi|118167259|gb|ABK68156.1| cytochrome P450 monooxygenase [Mycobacterium avium 104]
M. shigaense_orf00418	307797	307270	-	175	479	0	0	0	COG0225	NA	O	Putative peptide methionine sulfoxide reductase MsrA (protein-methionine-S-oxide reductase) (peptide met(O) reductase) [Mycobacterium canettii CIPT 140070010] gi|433640269|ref|YP_007286028.1| Putative peptide methionine sulfoxide reductase MsrA (prot ...
M. shigaense_orf00419	307885	308391	+	168	84	0	0	0	NA	NOG41358	S	hypothetical protein MintA_20721 [Mycobacterium intracellulare ATCC 13950] gi|379749698|ref|YP_005340519.1| hypothetical protein OCU_49790 [Mycobacterium intracellulare ATCC 13950] gi|379756997|ref|YP_005345669.1| hypothetical protein OCO_49860 [Myco ...
M. shigaense_orf00420	308388	309413	+	341	49	0	0	0	COG0451	NA	M,G	NAD-dependent epimerase/dehydratase [Mycobacterium parascrofulaceum ATCC BAA-614] gi|295897273|gb|EFG76877.1| NAD-dependent epimerase/dehydratase [Mycobacterium parascrofulaceum ATCC BAA-614]
M. shigaense_orf00422	309483	309860	+	125	338	0	0	0	COG2343	NA	S	hypothetical protein OCU_49760 [Mycobacterium intracellulare ATCC 13950] gi|379756994|ref|YP_005345666.1| hypothetical protein OCO_49830 [Mycobacterium intracellulare MOTT-02] gi|379764517|ref|YP_005350914.1| hypothetical protein OCQ_50820 [Mycobacte ...
M. shigaense_orf00423	310342	311235	+	297	84	0	0	0	COG0122	NA	L	hypothetical protein MintA_20696 [Mycobacterium intracellulare ATCC 13950] gi|379749693|ref|YP_005340514.1| hypothetical protein OCU_49740 [Mycobacterium intracellulare ATCC 13950] gi|379756992|ref|YP_005345664.1| hypothetical protein OCO_49810 [Myco ...
M. shigaense_orf00424	310299	309844	-	151	210	0	0	0	COG3631	NA	R	hypothetical protein MCOL_V202990 [Mycobacterium colombiense CECT 3035] gi|400333667|gb|EJO91161.1| hypothetical protein MCOL_V202990 [Mycobacterium colombiense CECT 3035]
M. shigaense_orf00425	311312	311863	+	183	88	0	0	0	COG0783	NA	P	starvation-induced DNA protecting protein [Mycobacterium intracellulare ATCC 13950] gi|379756991|ref|YP_005345663.1| starvation-induced DNA protecting protein [Mycobacterium intracellulare MOTT-02] gi|379764514|ref|YP_005350911.1| starvation-induced ...
M. shigaense_orf00426	313305	311860	-	481	82	0	0	0	COG0038	NA	P	Putative ion channel involved in transport of chloride across the membrane [Mycobacterium canettii CIPT 140070017] gi|432164755|emb|CCK62217.1| Putative ion channel involved in transport of chloride across the membrane [Mycobacterium canettii CIPT 14 ...
M. shigaense_orf00427	313382	314422	+	346	261	0	0	0	COG1741	NA	R	chromosome condensation protein [Mycobacterium sp. H4Y] gi|442765509|gb|ELR83507.1| chromosome condensation protein [Mycobacterium sp. H4Y]
M. shigaense_orf00428	314454	315002	+	182	144	0	0	0	COG1309	NA	K	TetR family transcriptional regulator [Mycobacterium avium 104] gi|118168354|gb|ABK69251.1| transcriptional regulator, TetR family protein [Mycobacterium avium 104]
M. shigaense_orf00430	315112	316029	+	305	259	0	0	0	COG3315	NA	Q	methyltransferase, putative, family protein [Mycobacterium colombiense CECT 3035] gi|400333662|gb|EJO91156.1| methyltransferase, putative, family protein [Mycobacterium colombiense CECT 3035]
M. shigaense_orf00431	316056	316997	+	313	235	0	0	0	COG3315	NA	Q	methyltransferase [Mycobacterium parascrofulaceum ATCC BAA-614] gi|295897283|gb|EFG76887.1| methyltransferase [Mycobacterium parascrofulaceum ATCC BAA-614]
M. shigaense_orf00432	317174	318640	+	488	108	0	0	0	COG1316	NA	K	cell envelope-related function transcriptional attenuator [Mycobacterium colombiense CECT 3035] gi|400333660|gb|EJO91154.1| cell envelope-related function transcriptional attenuator [Mycobacterium colombiense CECT 3035]
M. shigaense_orf00433	318793	320214	+	473	190	0	0	0	COG1012	NA	C	aldehyde dehydrogenase [Mycobacterium parascrofulaceum ATCC BAA-614] gi|295897284|gb|EFG76888.1| aldehyde dehydrogenase [Mycobacterium parascrofulaceum ATCC BAA-614]
M. shigaense_orf00435	320281	321135	+	284	331	0	0	0	COG1028	NA	I,Q,R	hypothetical protein MCOL_V202945 [Mycobacterium colombiense CECT 3035] gi|400333658|gb|EJO91152.1| hypothetical protein MCOL_V202945 [Mycobacterium colombiense CECT 3035]
M. shigaense_orf00436	321966	321139	-	275	166	0	0	0	COG2365	NA	T	phosphotyrosine protein phosphatase ptpb [Mycobacterium parascrofulaceum ATCC BAA-614] gi|295897286|gb|EFG76890.1| phosphotyrosine protein phosphatase ptpb [Mycobacterium parascrofulaceum ATCC BAA-614]
M. shigaense_orf00437	323209	321959	-	416	136	0	0	0	COG1960	NA	I	acyl-CoA dehydrogenase famiy protein [Mycobacterium parascrofulaceum ATCC BAA-614] gi|295897287|gb|EFG76891.1| acyl-CoA dehydrogenase famiy protein [Mycobacterium parascrofulaceum ATCC BAA-614]
M. shigaense_orf00438	323313	323774	+	153	104	0	0	0	COG3558	NA	S	response regulator receiver domain protein [Mycobacterium parascrofulaceum ATCC BAA-614] gi|295897288|gb|EFG76892.1| response regulator receiver domain protein [Mycobacterium parascrofulaceum ATCC BAA-614]
M. shigaense_orf00439	323849	324949	+	366	79	0	0	0	COG3288	NA	C	PntAA [Mycobacterium avium subsp. paratuberculosis K-10] gi|118465844|ref|YP_884259.1| alanine dehydrogenase/pyridine nucleotide transhydrogenase [Mycobacterium avium 104] gi|417748518|ref|ZP_12396955.1| NAD/NADP transhydrogenase alpha subunit [Mycob ...
M. shigaense_orf00440	324950	325267	+	105	108	0	0	0	COG3288	NA	C	PntAB [Mycobacterium avium subsp. paratuberculosis K-10] gi|118464368|ref|YP_884258.1| PntAB protein [Mycobacterium avium 104] gi|254777483|ref|ZP_05218999.1| PntAB protein [Mycobacterium avium subsp. avium ATCC 25291] gi|417748517|ref|ZP_12396954.1| ...
M. shigaense_orf00443	325264	326688	+	474	136	0	0	0	COG1282	NA	C	pyridine transhydrogenase subunit [Mycobacterium leprae TN] gi|221230900|ref|YP_002504316.1| pyridine transhydrogenase subunit beta [Mycobacterium leprae Br4923] gi|13093853|emb|CAC32166.1| pyridine transhydrogenase subunit [beta] [Mycobacterium lepr ...
M. shigaense_orf00444	326871	326746	-	41	751	0	0	0	NA	NA	NA	hypothetical protein MAV_5139 [Mycobacterium avium 104] gi|254777481|ref|ZP_05218997.1| hypothetical protein MaviaA2_22821 [Mycobacterium avium subsp. avium ATCC 25291] gi|254822349|ref|ZP_05227350.1| hypothetical protein MintA_20621 [Mycobacterium i ...
M. shigaense_orf00445	327048	327683	+	211	60	0	0	0	COG1309	NA	K	putative transcriptional regulatory protein [Mycobacterium intracellulare ATCC 13950] gi|379764499|ref|YP_005350896.1| transcriptional regulator [Mycobacterium intracellulare MOTT-64] gi|387878344|ref|YP_006308648.1| transcriptional regulator [Mycoba ...
M. shigaense_orf00446	327769	328992	+	407	60	0	0	0	COG3804	NA	S	hypothetical protein W7S_24850 [Mycobacterium sp. MOTT36Y] gi|386791800|gb|AFJ37919.1| hypothetical protein W7S_24850 [Mycobacterium sp. MOTT36Y]
M. shigaense_orf00448	329060	329749	+	229	58	0	0	0	COG1028	NA	I,Q,R	3-alpha-(or 20-beta)-hydroxysteroid dehydrogenase [Mycobacterium colombiense CECT 3035] gi|400333647|gb|EJO91141.1| 3-alpha-(or 20-beta)-hydroxysteroid dehydrogenase [Mycobacterium colombiense CECT 3035]
M. shigaense_orf00449	329771	331114	+	447	87	0	0	0	COG0277	NA	C	Putative oxidoreductase [Mycobacterium canettii CIPT 140070017] gi|432164771|emb|CCK62235.1| Putative oxidoreductase [Mycobacterium canettii CIPT 140070017]
M. shigaense_orf00451	331240	331356	+	38	102	1	0	0	NA	NA	NA	NA
M. shigaense_orf00452	331603	331478	-	41	375	1	0	0	NA	NA	NA	NA
M. shigaense_orf00456	332101	332601	+	166	238	0	0	0	NA	NOG85258	K	putative regulatory protein [Mycobacterium ulcerans Agy99] gi|118568823|gb|ABL03574.1| conserved hypothetical regulatory protein [Mycobacterium ulcerans Agy99]
M. shigaense_orf00457	333163	332624	-	179	125	0	0	0	NA	NOG73426;NOG228423;NOG298228	K	hypothetical protein MAP3579c [Mycobacterium avium subsp. paratuberculosis K-10] gi|118466492|ref|YP_884251.1| TetR family transcriptional regulator [Mycobacterium avium 104] gi|440779066|ref|ZP_20957803.1| TetR family transcriptional regulator [Myco ...
M. shigaense_orf00458	334050	333217	-	277	70	0	0	0	NA	NOG11574	S	hypothetical protein MintA_16967 [Mycobacterium intracellulare ATCC 13950] gi|379756970|ref|YP_005345642.1| hypothetical protein OCO_49590 [Mycobacterium intracellulare MOTT-02] gi|378807186|gb|AFC51321.1| hypothetical protein OCO_49590 [Mycobacteriu ...
M. shigaense_orf00459	334888	334070	-	272	74	0	0	0	COG3386	NA	G	gluconolactonase [Mycobacterium colombiense CECT 3035] gi|400333643|gb|EJO91137.1| gluconolactonase [Mycobacterium colombiense CECT 3035]
M. shigaense_orf00460	334950	335072	+	40	54	1	0	0	NA	NA	NA	NA
M. shigaense_orf00461	335155	336048	+	297	81	0	0	0	COG1946	NA	I	conserved hypothetical protein [Mycobacterium parascrofulaceum ATCC BAA-614] gi|295897302|gb|EFG76906.1| conserved hypothetical protein [Mycobacterium parascrofulaceum ATCC BAA-614]
M. shigaense_orf00462	336054	336974	+	306	75	0	0	0	COG2141	NA	C	hypothetical protein MCOL_V202855 [Mycobacterium colombiense CECT 3035] gi|400333640|gb|EJO91134.1| hypothetical protein MCOL_V202855 [Mycobacterium colombiense CECT 3035]
M. shigaense_orf00463	336992	338158	+	388	47	0	1	0	COG1960	NA	I	acyl-CoA dehydrogenase middle domain-containing protein [Mycobacterium colombiense CECT 3035] gi|400333639|gb|EJO91133.1| acyl-CoA dehydrogenase middle domain-containing protein [Mycobacterium colombiense CECT 3035]
M. shigaense_orf00464	338219	338935	+	238	65	1	0	0	NA	NA	NA	permease [Mycobacterium parascrofulaceum ATCC BAA-614] gi|295897305|gb|EFG76909.1| permease [Mycobacterium parascrofulaceum ATCC BAA-614]
M. shigaense_orf00465	340708	339005	-	567	59	1	0	0	NA	NA	NA	monooxygenase FAD-binding protein [Paenibacillus mucilaginosus K02] gi|384089709|gb|AFH61145.1| monooxygenase FAD-binding protein [Paenibacillus mucilaginosus K02]
M. shigaense_orf00466	341617	341081	-	178	54	0	0	0	COG2343	NA	S	conserved hypothetical protein [Mycobacterium parascrofulaceum ATCC BAA-614] gi|295897306|gb|EFG76910.1| conserved hypothetical protein [Mycobacterium parascrofulaceum ATCC BAA-614]
M. shigaense_orf00467	341806	342084	+	92	82	1	0	0	NA	NA	NA	possible 12-oxophytodienoate reductase [Mycobacterium parascrofulaceum ATCC BAA-614] gi|295898970|gb|EFG78457.1| possible 12-oxophytodienoate reductase [Mycobacterium parascrofulaceum ATCC BAA-614]
M. shigaense_orf00469	342095	343264	+	389	56	0	0	0	COG1804	NA	C	E-cinnamoyl-CoA:R-phenyllactate CoA transferase [Mycobacterium parascrofulaceum ATCC BAA-614] gi|295897307|gb|EFG76911.1| E-cinnamoyl-CoA:R-phenyllactate CoA transferase [Mycobacterium parascrofulaceum ATCC BAA-614]
M. shigaense_orf00470	343426	343989	+	187	79	0	0	0	NA	NA	NA	hypothetical protein MAPs_45180 [Mycobacterium avium subsp. paratuberculosis S397] gi|440779074|ref|ZP_20957811.1| hypothetical protein D522_20661 [Mycobacterium avium subsp. paratuberculosis S5] gi|336459875|gb|EGO38787.1| hypothetical protein MAPs_ ...
M. shigaense_orf00472	343994	344698	+	234	64	0	0	0	NA	NA	NA	hypothetical protein MAP3589 [Mycobacterium avium subsp. paratuberculosis K-10] gi|417748501|ref|ZP_12396938.1| hypothetical protein MAPs_45170 [Mycobacterium avium subsp. paratuberculosis S397] gi|440779075|ref|ZP_20957812.1| hypothetical protein D5 ...
M. shigaense_orf00473	344695	345915	+	406	58	0	0	0	COG2124	NA	Q	cytochrome P450 superfamily protein [Mycobacterium sp. MOTT36Y] gi|386791783|gb|AFJ37902.1| cytochrome P450 superfamily protein [Mycobacterium sp. MOTT36Y]
M. shigaense_orf00474	345917	346894	+	325	51	0	0	0	COG1063	NA	R,E	zinc-binding dehydrogenase family oxidoreductase [Mycobacterium parascrofulaceum ATCC BAA-614] gi|295897311|gb|EFG76915.1| zinc-binding dehydrogenase family oxidoreductase [Mycobacterium parascrofulaceum ATCC BAA-614]
M. shigaense_orf00475	346891	347634	+	247	51	0	0	0	COG3836	NA	G	HpcH/HpaI aldolase [Mycobacterium avium subsp. paratuberculosis S5] gi|436720552|gb|ELP44799.1| HpcH/HpaI aldolase [Mycobacterium avium subsp. paratuberculosis S5]
M. shigaense_orf00477	347711	348439	+	242	52	0	0	0	COG1028	NA	I,Q,R	oxidoreductase [Mycobacterium intracellulare ATCC 13950]
M. shigaense_orf00478	348421	349950	+	509	52	0	0	0	COG2072	NA	P	lipolytic protein [Mycobacterium colombiense CECT 3035] gi|400333627|gb|EJO91121.1| lipolytic protein [Mycobacterium colombiense CECT 3035]
M. shigaense_orf00479	349947	350879	+	310	43	0	0	0	COG0657	NA	I	LipW protein [Mycobacterium parascrofulaceum ATCC BAA-614] gi|295897316|gb|EFG76920.1| LipW protein [Mycobacterium parascrofulaceum ATCC BAA-614]
M. shigaense_orf00481	350970	352163	+	397	81	1	0	0	NA	NA	NA	hypothetical protein OG2516_16204 [Oceanicola granulosus HTCC2516] gi|89045799|gb|EAR51860.1| hypothetical protein OG2516_16204 [Oceanicola granulosus HTCC2516]
M. shigaense_orf00484	352210	352683	+	157	80	0	0	0	COG0824	NA	R	hypothetical protein MCOL_V202775 [Mycobacterium colombiense CECT 3035] gi|400333624|gb|EJO91118.1| hypothetical protein MCOL_V202775 [Mycobacterium colombiense CECT 3035]
M. shigaense_orf00485	352743	353183	+	146	219	0	0	0	NA	NOG11610;NOG13431	S	cyclase/dehydrase [Mycobacterium avium 104] gi|254776562|ref|ZP_05218078.1| cyclase/dehydrase superfamily protein [Mycobacterium avium subsp. avium ATCC 25291] gi|417748492|ref|ZP_12396929.1| oligoketide cyclase/lipid transport protein [Mycobacterium ...
M. shigaense_orf00487	353776	353180	-	198	211	0	0	0	COG1802	NA	K	GntR family transcriptional regulator [Mycobacterium colombiense CECT 3035] gi|400333622|gb|EJO91116.1| GntR family transcriptional regulator [Mycobacterium colombiense CECT 3035]
M. shigaense_orf00490	354026	355678	+	550	464	0	0	0	COG0318	NA	I,Q	acyl-CoA synthetase [Mycobacterium intracellulare ATCC 13950] gi|379756948|ref|YP_005345620.1| acyl-CoA synthetase [Mycobacterium intracellulare MOTT-02] gi|379764471|ref|YP_005350868.1| acyl-CoA synthetase [Mycobacterium intracellulare MOTT-64] gi|3 ...
M. shigaense_orf00491	355935	356747	+	270	382	0	0	0	COG0767	NA	Q	integral membrane protein YrbE1A [Mycobacterium parascrofulaceum ATCC BAA-614] gi|295897324|gb|EFG76928.1| integral membrane protein YrbE1A [Mycobacterium parascrofulaceum ATCC BAA-614]
M. shigaense_orf00492	356749	357618	+	289	273	0	0	0	COG0767	NA	Q	ABC superfamily ATP binding cassette transporter, membrane protein [Mycobacterium parascrofulaceum ATCC BAA-614] gi|295897325|gb|EFG76929.1| ABC superfamily ATP binding cassette transporter, membrane protein [Mycobacterium parascrofulaceum ATCC BAA-6 ...
M. shigaense_orf00493	357624	358925	+	433	257	0	0	0	COG1463	NA	Q	virulence factor mce family protein [Mycobacterium parascrofulaceum ATCC BAA-614] gi|295897326|gb|EFG76930.1| virulence factor mce family protein [Mycobacterium parascrofulaceum ATCC BAA-614]
M. shigaense_orf00494	358922	359962	+	346	292	0	0	0	COG1463	NA	Q	hypothetical protein MAP3605 [Mycobacterium avium subsp. paratuberculosis K-10] gi|118463171|ref|YP_884134.1| virulence factor Mce [Mycobacterium avium 104] gi|254776555|ref|ZP_05218071.1| virulence factor Mce family protein [Mycobacterium avium subs ...
M. shigaense_orf00497	359986	361548	+	520	293	0	0	0	COG1463	NA	Q	virulence factor Mce family protein [Mycobacterium avium subsp. paratuberculosis S397] gi|336460087|gb|EGO38996.1| virulence factor Mce family protein [Mycobacterium avium subsp. paratuberculosis S397]
M. shigaense_orf00499	361545	363137	+	530	325	0	0	0	COG1463	NA	Q	hypothetical protein MCOL_V202730 [Mycobacterium colombiense CECT 3035] gi|400333615|gb|EJO91109.1| hypothetical protein MCOL_V202730 [Mycobacterium colombiense CECT 3035]
M. shigaense_orf00500	363209	364351	+	380	260	0	0	0	COG1463	NA	Q	LprK [Mycobacterium avium subsp. paratuberculosis K-10] gi|254777450|ref|ZP_05218966.1| LprK [Mycobacterium avium subsp. avium ATCC 25291] gi|440779090|ref|ZP_20957827.1| virulence factor Mce [Mycobacterium avium subsp. paratuberculosis S5] gi|413985 ...
M. shigaense_orf00502	364345	365895	+	516	266	0	0	0	COG1463	NA	Q	hypothetical protein MAP3609 [Mycobacterium avium subsp. paratuberculosis K-10] gi|417748449|ref|ZP_12396889.1| virulence factor Mce family protein [Mycobacterium avium subsp. paratuberculosis S397] gi|440779091|ref|ZP_20957828.1| hypothetical protei ...
M. shigaense_orf00503	365865	366581	+	238	240	0	0	0	NA	NOG11587	NA	Mce associated membrane protein [Mycobacterium parascrofulaceum ATCC BAA-614] gi|295897332|gb|EFG76936.1| Mce associated membrane protein [Mycobacterium parascrofulaceum ATCC BAA-614]
M. shigaense_orf00504	366744	366613	-	43	196	1	0	0	NA	NA	NA	NA
M. shigaense_orf00505	366779	367561	+	260	112	0	0	0	COG1714	NA	S	RDD family protein [Mycobacterium intracellulare MOTT-02] gi|378807154|gb|AFC51289.1| RDD family protein [Mycobacterium intracellulare MOTT-02]
M. shigaense_orf00506	367558	368112	+	184	83	0	0	0	NA	NOG117204	NA	hypothetical protein MAP3612 [Mycobacterium avium subsp. paratuberculosis K-10] gi|118464257|ref|YP_884127.1| hypothetical protein MAV_5007 [Mycobacterium avium 104] gi|254777446|ref|ZP_05218962.1| hypothetical protein MaviaA2_22646 [Mycobacterium av ...
M. shigaense_orf00508	368079	368900	+	273	115	0	0	0	NA	NOG11380	NA	mce associated membrane protein [Mycobacterium parascrofulaceum ATCC BAA-614] gi|295897335|gb|EFG76939.1| mce associated membrane protein [Mycobacterium parascrofulaceum ATCC BAA-614]
M. shigaense_orf00510	368949	369650	+	233	64	0	1	0	NA	NOG242951;NOG117944;NOG246002	S	hypothetical protein MCOL_V202695 [Mycobacterium colombiense CECT 3035] gi|400333608|gb|EJO91102.1| hypothetical protein MCOL_V202695 [Mycobacterium colombiense CECT 3035]
M. shigaense_orf00511	370741	369647	-	364	84	0	0	0	NA	NOG45575	NA	lprO [Mycobacterium intracellulare ATCC 13950] gi|379764457|ref|YP_005350854.1| lprO [Mycobacterium intracellulare MOTT-64] gi|387878300|ref|YP_006308604.1| lprO [Mycobacterium sp. MOTT36Y] gi|406033201|ref|YP_006732093.1| LprO [Mycobacterium indicus ...
M. shigaense_orf00512	372296	370848	-	482	55	0	0	0	COG1511	NA	S	hypothetical protein ML2600 [Mycobacterium leprae TN] gi|221230880|ref|YP_002504296.1| hypothetical protein MLBr_02600 [Mycobacterium leprae Br4923] gi|13093833|emb|CAC32132.1| probable conserved membrane protein [Mycobacterium leprae] gi|219933987|e ...
M. shigaense_orf00514	373926	373063	-	287	75	0	1	0	NA	NOG226776	E	conserved hypothetical protein [Mycobacterium parascrofulaceum ATCC BAA-614] gi|295897340|gb|EFG76944.1| conserved hypothetical protein [Mycobacterium parascrofulaceum ATCC BAA-614]
M. shigaense_orf00516	373057	372332	-	241	75	0	0	0	COG1741	NA	R	hypothetical protein MCAN_01871 [Mycobacterium canettii CIPT 140010059] gi|433625282|ref|YP_007258911.1| Conserved protein of unknown function [Mycobacterium canettii CIPT 140060008] gi|340003408|emb|CCC42528.1| conserved hypothetical protein [Mycoba ...
M. shigaense_orf00517	373987	375126	+	379	102	0	1	0	COG3804	NA	S	hypothetical protein MAP3619 [Mycobacterium avium subsp. paratuberculosis K-10] gi|417748439|ref|ZP_12396879.1| uncharacterized dihydrodipicolinate reductase-like protein [Mycobacterium avium subsp. paratuberculosis S397] gi|41398549|gb|AAS06169.1| h ...
M. shigaense_orf00518	376067	375117	-	316	112	0	1	0	COG0697	NOG259096	S,R,E,G	hypothetical protein MaviaA2_00441 [Mycobacterium avium subsp. avium ATCC 25291]
M. shigaense_orf00519	376238	377089	+	283	103	0	0	0	COG0583	NA	K	transcriptional regulator [Mycobacterium avium subsp. paratuberculosis S397] gi|336459398|gb|EGO38340.1| transcriptional regulator [Mycobacterium avium subsp. paratuberculosis S397]
M. shigaense_orf00521	378465	377092	-	457	78	0	0	0	NA	NOG81641	S	hypothetical protein MAV_5000 [Mycobacterium avium 104] gi|254777438|ref|ZP_05218954.1| hypothetical protein MaviaA2_22606 [Mycobacterium avium subsp. avium ATCC 25291] gi|118165984|gb|ABK66881.1| conserved hypothetical protein [Mycobacterium avium 1 ...
M. shigaense_orf00523	378702	378535	-	55	80	0	1	0	NA	NA	NA	RNA polymerase sigma-70 factor, TIGR02960 family [Mycobacterium avium subsp. paratuberculosis S397] gi|336460072|gb|EGO38981.1| RNA polymerase sigma-70 factor, TIGR02960 family [Mycobacterium avium subsp. paratuberculosis S397]
M. shigaense_orf00524	378883	379725	+	280	80	0	0	0	COG2267	NA	I	lysophospholipase [Mycobacterium colombiense CECT 3035] gi|400333600|gb|EJO91094.1| lysophospholipase [Mycobacterium colombiense CECT 3035]
M. shigaense_orf00526	379760	380509	+	249	126	0	0	1	NA	NOG131706	NA	hypothetical protein MintA_15819 [Mycobacterium intracellulare ATCC 13950] gi|379749627|ref|YP_005340448.1| hypothetical protein OCU_49080 [Mycobacterium intracellulare ATCC 13950] gi|379756926|ref|YP_005345598.1| hypothetical protein OCO_49150 [Myco ...
M. shigaense_orf00527	380581	381021	+	146	108	0	0	0	NA	NOG11366	NA	hypothetical protein MCOL_V202645 [Mycobacterium colombiense CECT 3035] gi|400333598|gb|EJO91092.1| hypothetical protein MCOL_V202645 [Mycobacterium colombiense CECT 3035]
M. shigaense_orf00530	381014	383134	+	706	1994	0	0	0	COG1472	NA	G	possible beta-glucosidase [Mycobacterium parascrofulaceum ATCC BAA-614] gi|295897347|gb|EFG76951.1| possible beta-glucosidase [Mycobacterium parascrofulaceum ATCC BAA-614]
M. shigaense_orf00532	383320	383174	-	48	12395	0	0	0	NA	NA	NA	conserved hypothetical protein [Mycobacterium parascrofulaceum ATCC BAA-614] gi|295897348|gb|EFG76952.1| conserved hypothetical protein [Mycobacterium parascrofulaceum ATCC BAA-614]
M. shigaense_orf00533	383413	384144	+	243	353	0	0	0	COG4122	NA	R	hypothetical protein OCO_49110 [Mycobacterium intracellulare MOTT-02] gi|378807138|gb|AFC51273.1| hypothetical protein OCO_49110 [Mycobacterium intracellulare MOTT-02]
M. shigaense_orf00535	385844	384153	-	563	406	0	0	1	COG0129	NA	E,G	dihydroxy-acid dehydratase [Mycobacterium intracellulare MOTT-02] gi|379764443|ref|YP_005350840.1| dihydroxy-acid dehydratase [Mycobacterium intracellulare MOTT-64] gi|387878285|ref|YP_006308589.1| dihydroxy-acid dehydratase [Mycobacterium sp. MOTT36 ...
M. shigaense_orf00538	385921	386211	+	96	2655	0	0	1	COG1937	NA	S	hypothetical protein MAP3632 [Mycobacterium avium subsp. paratuberculosis K-10] gi|118466419|ref|YP_884109.1| hypothetical protein MAV_4988 [Mycobacterium avium 104] gi|254777428|ref|ZP_05218944.1| hypothetical protein MaviaA2_22556 [Mycobacterium av ...
M. shigaense_orf00540	386289	387587	+	432	412	0	0	0	COG2814	NA	G	sugar transporter family protein [Mycobacterium avium 104] gi|254777427|ref|ZP_05218943.1| hypothetical protein MaviaA2_22551 [Mycobacterium avium subsp. avium ATCC 25291] gi|440779112|ref|ZP_20957849.1| hypothetical protein D522_20891 [Mycobacterium ...
M. shigaense_orf00541	387705	388739	+	344	291	0	0	0	COG1376	NA	S	erfK/YbiS/YcfS/YnhG family protein [Mycobacterium colombiense CECT 3035] gi|400333590|gb|EJO91084.1| erfK/YbiS/YcfS/YnhG family protein [Mycobacterium colombiense CECT 3035]
M. shigaense_orf00542	388817	389416	+	199	119	0	0	0	COG1309	NA	K	Putative transcriptional regulatory protein [Mycobacterium canettii CIPT 140070010] gi|432160880|emb|CCK58212.1| Putative transcriptional regulatory protein [Mycobacterium canettii CIPT 140070010]
M. shigaense_orf00544	389406	391655	+	749	85	0	0	0	COG0243	NA	C	molybdopterin oxidoreductase Fe4S4 subunit [Mycobacterium avium subsp. avium ATCC 25291]
M. shigaense_orf00547	393712	394374	+	220	66	0	0	0	NA	NOG226422;NOG11256	S	Probable conserved membrane protein [Mycobacterium tuberculosis H37Rv] gi|31791377|ref|NP_853870.1| hypothetical protein Mb0205 [Mycobacterium bovis AF2122/97] gi|121636111|ref|YP_976334.1| hypothetical protein BCG_0236 [Mycobacterium bovis BCG str. ...
M. shigaense_orf00548	393633	391639	-	664	113	0	0	0	COG3590	NA	O	metalloendopeptidase PepO [Mycobacterium parascrofulaceum ATCC BAA-614] gi|295897224|gb|EFG76829.1| metalloendopeptidase PepO [Mycobacterium parascrofulaceum ATCC BAA-614]
M. shigaense_orf00549	394371	395057	+	228	93	0	0	0	NA	NOG10822	NA	hypothetical protein ML2615 [Mycobacterium leprae TN] gi|221230888|ref|YP_002504304.1| hypothetical protein MLBr_02615 [Mycobacterium leprae Br4923] gi|2104602|emb|CAB08802.1| unknown [Mycobacterium leprae] gi|13093841|emb|CAC32147.1| probable membra ...
M. shigaense_orf00550	395585	395070	-	171	216	0	0	0	NA	NOG11925	NA	hypothetical protein MAV_4974 [Mycobacterium avium 104] gi|254777413|ref|ZP_05218929.1| hypothetical protein MaviaA2_22481 [Mycobacterium avium subsp. avium ATCC 25291] gi|118166045|gb|ABK66942.1| conserved hypothetical protein [Mycobacterium avium 1 ...
M. shigaense_orf00552	398772	398939	+	55	71	1	0	0	NA	NA	NA	NA
M. shigaense_orf00553	398668	395582	-	1028	179	0	0	0	COG2409	NA	R	mmpL11 protein [Mycobacterium colombiense CECT 3035] gi|400333583|gb|EJO91077.1| mmpL11 protein [Mycobacterium colombiense CECT 3035]
M. shigaense_orf00554	398950	399444	+	164	123	0	0	0	NA	NOG45275	NA	hypothetical protein MCOL_V202565 [Mycobacterium colombiense CECT 3035] gi|400333582|gb|EJO91076.1| hypothetical protein MCOL_V202565 [Mycobacterium colombiense CECT 3035]
M. shigaense_orf00555	400628	399441	-	395	141	0	0	0	COG0392	NA	S	hypothetical protein MintA_23389 [Mycobacterium intracellulare ATCC 13950]
M. shigaense_orf00557	400767	401912	+	381	88	0	0	0	COG0628	NA	R	transmembrane protein [Mycobacterium colombiense CECT 3035] gi|400333580|gb|EJO91074.1| transmembrane protein [Mycobacterium colombiense CECT 3035]
M. shigaense_orf00559	404738	401931	-	935	206	0	0	0	COG2409	NA	R	MmpL3 [Mycobacterium avium subsp. paratuberculosis K-10] gi|417748418|ref|ZP_12396858.1| putative RND superfamily drug exporter [Mycobacterium avium subsp. paratuberculosis S397] gi|41398571|gb|AAS06191.1| MmpL3 [Mycobacterium avium subsp. paratuberc ...
M. shigaense_orf00561	405564	404824	-	246	189	0	0	0	NA	NOG05977	S	hypothetical protein MCOL_V202545 [Mycobacterium colombiense CECT 3035] gi|400333578|gb|EJO91072.1| hypothetical protein MCOL_V202545 [Mycobacterium colombiense CECT 3035]
M. shigaense_orf00563	406216	405578	-	212	119	0	0	0	COG0220	NA	R	tRNA (guanine-N(7)-)-methyltransferase [Mycobacterium colombiense CECT 3035] gi|400333577|gb|EJO91071.1| tRNA (guanine-N(7)-)-methyltransferase [Mycobacterium colombiense CECT 3035]
M. shigaense_orf00565	406555	407640	+	361	87	0	0	0	NA	NOG44813	NA	hypothetical protein MCOL_V202535 [Mycobacterium colombiense CECT 3035] gi|400333576|gb|EJO91070.1| hypothetical protein MCOL_V202535 [Mycobacterium colombiense CECT 3035]
M. shigaense_orf00566	407637	409142	+	501	87	0	0	0	NA	NOG41327	NA	conserved hypothetical protein [Mycobacterium parascrofulaceum ATCC BAA-614] gi|295897181|gb|EFG76788.1| conserved hypothetical protein [Mycobacterium parascrofulaceum ATCC BAA-614]
M. shigaense_orf00568	409353	411194	+	613	574	0	0	1	COG1274	NA	C	phosphoenolpyruvate carboxykinase [Mycobacterium intracellulare MOTT-64] gi|378812366|gb|AFC56500.1| phosphoenolpyruvate carboxykinase [Mycobacterium intracellulare MOTT-64]
M. shigaense_orf00569	411297	411596	+	99	161	0	0	0	NA	NOG222309	S	hypothetical protein MAP0143 [Mycobacterium avium subsp. paratuberculosis K-10] gi|41394589|gb|AAS02460.1| hypothetical protein MAP_0143 [Mycobacterium avium subsp. paratuberculosis K-10]
M. shigaense_orf00570	411676	413193	+	505	69	0	0	0	COG0318	NA	I,Q	long-chain-fatty-acid--CoA ligase [Mycobacterium intracellulare MOTT-64] gi|378812364|gb|AFC56498.1| long-chain-fatty-acid--CoA ligase [Mycobacterium intracellulare MOTT-64]
M. shigaense_orf00572	413198	414175	+	325	67	0	0	0	COG1024	NA	I	enoyl-CoA hydratase/isomerase family protein [Mycobacterium intracellulare ATCC 13950] gi|379756896|ref|YP_005345568.1| enoyl-CoA hydratase/isomerase family protein [Mycobacterium intracellulare MOTT-02] gi|387878263|ref|YP_006308567.1| enoyl-CoA hyd ...
M. shigaense_orf00573	414447	414172	-	91	78	0	0	0	NA	NOG17297	S	conserved hypothetical protein [Mycobacterium parascrofulaceum ATCC BAA-614] gi|295897186|gb|EFG76793.1| conserved hypothetical protein [Mycobacterium parascrofulaceum ATCC BAA-614]
M. shigaense_orf00574	415884	414736	-	382	41	0	0	0	COG1960	NA	I	fadE3_2 [Mycobacterium intracellulare MOTT-02] gi|379764419|ref|YP_005350816.1| fadE3_2 [Mycobacterium intracellulare MOTT-64] gi|406033162|ref|YP_006732054.1| acyl-CoA dehydrogenase [Mycobacterium indicus pranii MTCC 9506] gi|443308043|ref|ZP_210378 ...
M. shigaense_orf00576	415953	416972	+	339	80	0	0	0	COG2030	NA	I	P40 protein [Mycobacterium colombiense CECT 3035] gi|400333568|gb|EJO91062.1| P40 protein [Mycobacterium colombiense CECT 3035]
M. shigaense_orf00577	416984	418171	+	395	56	0	0	0	COG1804	NA	C	conserved hypothetical protein [Mycobacterium parascrofulaceum ATCC BAA-614] gi|295897189|gb|EFG76796.1| conserved hypothetical protein [Mycobacterium parascrofulaceum ATCC BAA-614]
M. shigaense_orf00578	418165	419469	+	434	47	0	0	0	COG1574	NA	R	amidohydrolase 3 [Mycobacterium parascrofulaceum ATCC BAA-614] gi|295897190|gb|EFG76797.1| amidohydrolase 3 [Mycobacterium parascrofulaceum ATCC BAA-614]
M. shigaense_orf00579	420126	419629	-	165	46	0	0	0	NA	NA	NA	alpha/beta hydrolase fold protein [Mycobacterium xenopi RIVM700367] gi|383334266|gb|EID12708.1| alpha/beta hydrolase fold protein [Mycobacterium xenopi RIVM700367]
M. shigaense_orf00581	420304	420531	+	75	57	0	0	0	NA	NA	NA	putative nitrite reductase small subunit [Gordonia aichiensis NBRC 108223] gi|441448038|dbj|GAC47997.1| putative nitrite reductase small subunit [Gordonia aichiensis NBRC 108223]
M. shigaense_orf00583	420657	421859	+	400	140	0	0	0	COG0657	NA	I	alpha/beta hydrolase fold protein [Mycobacterium intracellulare MOTT-64] gi|387878254|ref|YP_006308558.1| alpha/beta fold family hydrolase [Mycobacterium sp. MOTT36Y] gi|378812353|gb|AFC56487.1| alpha/beta hydrolase fold protein [Mycobacterium intrac ...
M. shigaense_orf00584	421897	423312	+	471	89	0	0	0	NA	NOG275354	NA	hypothetical protein MMAR_0464 [Mycobacterium marinum M] gi|443488915|ref|YP_007367062.1| diacylglycerol O-acyltransferase [Mycobacterium liflandii 128FXT] gi|183173819|gb|ACC38929.1| conserved hypothetical protein [Mycobacterium marinum M] gi|442581 ...
M. shigaense_orf00587	423458	424243	+	261	78	0	0	0	COG1024	NA	I	enoyl-CoA hydratase [Mycobacterium colombiense CECT 3035] gi|400333560|gb|EJO91054.1| enoyl-CoA hydratase [Mycobacterium colombiense CECT 3035]
M. shigaense_orf00589	424450	424289	-	53	68	1	0	0	NA	NA	NA	MIP family channel protein [Mycobacterium colombiense CECT 3035] gi|400333559|gb|EJO91053.1| MIP family channel protein [Mycobacterium colombiense CECT 3035]
M. shigaense_orf00590	424707	426209	+	500	211	0	0	0	COG0318	NA	I,Q	AMP-dependent synthetase and ligase [Mycobacterium parascrofulaceum ATCC BAA-614] gi|295897197|gb|EFG76804.1| AMP-dependent synthetase and ligase [Mycobacterium parascrofulaceum ATCC BAA-614]
M. shigaense_orf00591	426206	426502	+	98	209	0	0	0	NA	NOG132923	S	hypothetical protein MintA_22199 [Mycobacterium intracellulare ATCC 13950] gi|379749583|ref|YP_005340404.1| hypothetical protein OCU_48640 [Mycobacterium intracellulare ATCC 13950] gi|379756881|ref|YP_005345553.1| hypothetical protein OCO_48700 [Myco ...
M. shigaense_orf00592	427163	426507	-	218	343	0	0	0	COG1309	NA	K	TetR family transcriptional regulator [Mycobacterium avium 104] gi|254777387|ref|ZP_05218903.1| transcriptional regulator, TetR family protein [Mycobacterium avium subsp. avium ATCC 25291] gi|417748398|ref|ZP_12396838.1| transcriptional regulator [My ...
M. shigaense_orf00593	427317	427186	-	43	787	0	0	0	NA	NA	NA	conserved hypothetical protein [Mycobacterium parascrofulaceum ATCC BAA-614] gi|295897200|gb|EFG76807.1| conserved hypothetical protein [Mycobacterium parascrofulaceum ATCC BAA-614]
M. shigaense_orf00594	429166	427655	-	503	295	0	0	0	COG1012	NA	C	aldehyde dehydrogenase [Mycobacterium avium 104] gi|254777385|ref|ZP_05218901.1| aldehyde dehydrogenase family protein [Mycobacterium avium subsp. avium ATCC 25291] gi|118164075|gb|ABK64972.1| aldehyde dehydrogenase family protein [Mycobacterium aviu ...
M. shigaense_orf00597	429940	429170	-	256	63	0	0	0	COG0500	NA	Q,R	SAM-dependent methyltransferase [Mycobacterium avium subsp. avium ATCC 25291]
M. shigaense_orf00598	429981	431135	+	384	111	0	0	0	COG0438	NA	M	hypothetical protein MaviaA2_22321 [Mycobacterium avium subsp. avium ATCC 25291]
M. shigaense_orf00600	432825	431119	-	568	52	0	0	0	NA	NOG16841	NA	hypothetical protein W7S_24345 [Mycobacterium sp. MOTT36Y] gi|386791699|gb|AFJ37818.1| membrane protein [Mycobacterium sp. MOTT36Y]
M. shigaense_orf00603	434115	432835	-	426	99	0	0	0	NA	NOG08639	S	hypothetical protein W7S_24340 [Mycobacterium sp. MOTT36Y] gi|386791698|gb|AFJ37817.1| hypothetical protein W7S_24340 [Mycobacterium sp. MOTT36Y]
M. shigaense_orf00604	434369	435490	+	373	49	0	0	0	COG1835	NA	I	acyltransferase [Mycobacterium avium 104] gi|254777379|ref|ZP_05218895.1| acyltransferase [Mycobacterium avium subsp. avium ATCC 25291] gi|118166077|gb|ABK66974.1| acyltransferase [Mycobacterium avium 104]
M. shigaense_orf00605	435966	435487	-	159	47	0	0	0	NA	NA	NA	hypothetical protein MCOL_V202385 [Mycobacterium colombiense CECT 3035] gi|400333546|gb|EJO91040.1| hypothetical protein MCOL_V202385 [Mycobacterium colombiense CECT 3035]
M. shigaense_orf00607	437526	436036	-	496	58	0	0	0	COG0318	NA	I,Q	bile acid-coenzyme A ligase [Mycobacterium parascrofulaceum ATCC BAA-614] gi|295897207|gb|EFG76814.1| bile acid-coenzyme A ligase [Mycobacterium parascrofulaceum ATCC BAA-614]
M. shigaense_orf00609	438499	437519	-	326	62	0	0	0	COG1735	NA	R	hypothetical protein MCOL_V202375 [Mycobacterium colombiense CECT 3035] gi|400333544|gb|EJO91038.1| hypothetical protein MCOL_V202375 [Mycobacterium colombiense CECT 3035]
M. shigaense_orf00610	438607	440316	+	569	81	0	0	0	COG1960	NA	I	probable acyl-CoA dehydrogenase [Mycobacterium parascrofulaceum ATCC BAA-614] gi|295897209|gb|EFG76816.1| probable acyl-CoA dehydrogenase [Mycobacterium parascrofulaceum ATCC BAA-614]
M. shigaense_orf00611	440413	441114	+	233	282	0	0	0	COG1309	NA	K	TetR family transcriptional regulator [Mycobacterium indicus pranii MTCC 9506] gi|405131675|gb|AFS16930.1| Transcriptional regulator, TetR family protein [Mycobacterium indicus pranii MTCC 9506]
M. shigaense_orf00613	441111	442046	+	311	287	0	0	0	COG0208	NA	F	ribonucleotide-diphosphate reductase subunit beta [Mycobacterium sp. MOTT36Y] gi|443308014|ref|ZP_21037801.1| ribonucleotide-diphosphate reductase subunit beta [Mycobacterium sp. H4Y] gi|386791689|gb|AFJ37808.1| ribonucleotide-diphosphate reductase s ...
M. shigaense_orf00615	443427	442051	-	458	152	0	0	0	COG1012	NA	C	succinate-semialdehyde dehydrogenase [Mycobacterium parascrofulaceum ATCC BAA-614] gi|295897212|gb|EFG76819.1| succinate-semialdehyde dehydrogenase [Mycobacterium parascrofulaceum ATCC BAA-614]
M. shigaense_orf00616	443510	445159	+	549	168	0	0	0	COG0028	NA	H,E	acetolactate synthase [Mycobacterium parascrofulaceum ATCC BAA-614] gi|295897213|gb|EFG76820.1| acetolactate synthase [Mycobacterium parascrofulaceum ATCC BAA-614]
M. shigaense_orf00617	445197	445325	+	42	218	0	0	0	NA	NA	NA	hypothetical protein W7S_13955 [Mycobacterium sp. MOTT36Y] gi|443305898|ref|ZP_21035686.1| hypothetical protein W7U_09505 [Mycobacterium sp. H4Y] gi|386789637|gb|AFJ35756.1| hypothetical protein W7S_13955 [Mycobacterium sp. MOTT36Y] gi|442767462|gb|E ...
M. shigaense_orf00619	445567	446475	+	302	63	0	0	0	COG0583	NA	K	HTH-type transcriptional regulator cynR [Mycobacterium indicus pranii MTCC 9506] gi|405131665|gb|AFS16920.1| HTH-type transcriptional regulator cynR [Mycobacterium indicus pranii MTCC 9506]
M. shigaense_orf00620	446579	447733	+	384	58	0	0	0	COG1052	NA	H,C,R	Formate dehydrogenase [Mycobacterium indicus pranii MTCC 9506] gi|405131664|gb|AFS16919.1| Formate dehydrogenase [Mycobacterium indicus pranii MTCC 9506]
M. shigaense_orf00621	447797	448006	+	69	45	1	0	0	NA	NA	NA	NA
M. shigaense_orf00623	448267	448019	-	82	44	0	0	0	NA	NA	NA	PPE family protein, partial [Mycobacterium tuberculosis '98-R604 INH-RIF-EM']
M. shigaense_orf00625	450232	448784	-	482	55	0	0	0	NA	NOG81106	S	hypothetical protein MAP3685c [Mycobacterium avium subsp. paratuberculosis K-10] gi|440779169|ref|ZP_20957901.1| hypothetical protein D522_21196 [Mycobacterium avium subsp. paratuberculosis S5] gi|41398615|gb|AAS06235.1| hypothetical protein MAP_3685 ...
M. shigaense_orf00629	454486	450269	-	1405	101	0	0	0	NA	NOG04181	S	hypothetical protein MCOL_V202310 [Mycobacterium colombiense CECT 3035] gi|400333531|gb|EJO91025.1| hypothetical protein MCOL_V202310 [Mycobacterium colombiense CECT 3035]
M. shigaense_orf00630	454850	454677	-	57	1135	0	0	0	NA	NOG14163	NA	conserved hypothetical protein [Mycobacterium parascrofulaceum ATCC BAA-614] gi|295897140|gb|EFG76749.1| conserved hypothetical protein [Mycobacterium parascrofulaceum ATCC BAA-614]
M. shigaense_orf00632	455164	454958	-	68	87	0	0	0	NA	NA	NA	conserved hypothetical protein [Mycobacterium parascrofulaceum ATCC BAA-614] gi|295897141|gb|EFG76750.1| conserved hypothetical protein [Mycobacterium parascrofulaceum ATCC BAA-614]
M. shigaense_orf00635	455292	456431	+	379	56	0	0	0	COG1472	NA	G	beta-N-acetylhexosaminidase [Mycobacterium parascrofulaceum ATCC BAA-614] gi|295897142|gb|EFG76751.1| beta-N-acetylhexosaminidase [Mycobacterium parascrofulaceum ATCC BAA-614]
M. shigaense_orf00636	456547	457143	+	198	300	0	0	0	COG1309	NA	K	hypothetical protein MAP3689 [Mycobacterium avium subsp. paratuberculosis K-10] gi|118463516|ref|YP_884040.1| TetR family transcriptional regulator [Mycobacterium avium 104] gi|254777358|ref|ZP_05218874.1| transcriptional regulator, TetR family prote ...
M. shigaense_orf00639	457168	458436	+	422	81	0	0	0	COG0038	NOG150520	P	chloride transporter, chloride channel (ClC) family protein [Mycobacterium intracellulare ATCC 13950] gi|378801907|gb|AFC46043.1| chloride transporter, chloride channel (ClC) family protein [Mycobacterium intracellulare ATCC 13950]
M. shigaense_orf00641	459283	458441	-	280	99	0	0	0	COG2030	NA	I	hypothetical protein MLCB1883.17c [Mycobacterium leprae]
M. shigaense_orf00642	460659	459283	-	458	83	0	0	1	COG1028	NA	I,Q,R	3-ketoacyl-(acyl-carrier-protein) reductase [Mycobacterium avium 104] gi|118167376|gb|ABK68273.1| oxidoreductase, short chain dehydrogenase/reductase family protein [Mycobacterium avium 104]
M. shigaense_orf00643	460894	462168	+	424	178	0	0	1	COG0183	NA	I	thiolase [Mycobacterium parascrofulaceum ATCC BAA-614] gi|295897147|gb|EFG76756.1| thiolase [Mycobacterium parascrofulaceum ATCC BAA-614]
M. shigaense_orf00644	462417	462265	-	50	37	1	0	0	NA	NA	NA	NA
M. shigaense_orf00646	464285	462450	-	611	601	0	0	1	COG1960	NA	I	acyl-CoA dehydrogenase [Mycobacterium parascrofulaceum ATCC BAA-614] gi|295897148|gb|EFG76757.1| acyl-CoA dehydrogenase [Mycobacterium parascrofulaceum ATCC BAA-614]
M. shigaense_orf00647	464499	465515	+	338	79	0	0	0	COG3491	NA	R	Gibberellin 2-beta-dioxygenase 2 [Mycobacterium indicus pranii MTCC 9506] gi|405131648|gb|AFS16903.1| Gibberellin 2-beta-dioxygenase 2 [Mycobacterium indicus pranii MTCC 9506]
M. shigaense_orf00649	465546	466040	+	164	149	0	0	1	COG1853	NA	R	actinorhodin polyketide dimerase [Mycobacterium indicus pranii MTCC 9506] gi|405131647|gb|AFS16902.1| Actinorhodin polyketide dimerase [Mycobacterium indicus pranii MTCC 9506]
M. shigaense_orf00651	466606	466079	-	175	128	0	0	0	COG0479	NA	C	ferredoxin [Mycobacterium parascrofulaceum ATCC BAA-614] gi|295897151|gb|EFG76760.1| ferredoxin [Mycobacterium parascrofulaceum ATCC BAA-614]
M. shigaense_orf00654	466821	466612	-	69	92	0	0	0	NA	NA	NA	fumarate reductase iron-sulfur subunit [Mycobacterium avium subsp. paratuberculosis S5] gi|436720377|gb|ELP44641.1| fumarate reductase iron-sulfur subunit [Mycobacterium avium subsp. paratuberculosis S5]
M. shigaense_orf00656	468737	466821	-	638	111	0	0	0	COG1053	NA	C	succinate dehydrogenase [Mycobacterium parascrofulaceum ATCC BAA-614] gi|295897152|gb|EFG76761.1| succinate dehydrogenase [Mycobacterium parascrofulaceum ATCC BAA-614]
M. shigaense_orf00657	469610	468780	-	276	104	0	0	0	NA	NOG11326	S	integral membrane protein [Mycobacterium parascrofulaceum ATCC BAA-614] gi|295897153|gb|EFG76762.1| integral membrane protein [Mycobacterium parascrofulaceum ATCC BAA-614]
M. shigaense_orf00658	469988	469692	-	98	330	0	0	0	NA	NOG09545	NA	conserved hypothetical protein [Mycobacterium parascrofulaceum ATCC BAA-614] gi|295897154|gb|EFG76763.1| conserved hypothetical protein [Mycobacterium parascrofulaceum ATCC BAA-614]
M. shigaense_orf00659	470613	470119	-	164	392	0	0	0	NA	NA	NA	hypothetical protein SACE_2227 [Saccharopolyspora erythraea NRRL 2338] gi|291005850|ref|ZP_06563823.1| hypothetical protein SeryN2_15118 [Saccharopolyspora erythraea NRRL 2338] gi|133911419|emb|CAM01532.1| hypothetical protein SACE_2227 [Saccharopoly ...
M. shigaense_orf00660	470675	471250	+	191	551	0	0	0	NA	NA	NA	hypothetical protein MycrhDRAFT_3378 [Mycobacterium rhodesiae JS60] gi|353190674|gb|EHB56184.1| hypothetical protein MycrhDRAFT_3378 [Mycobacterium rhodesiae JS60]
M. shigaense_orf00661	471789	471328	-	153	690	0	0	0	COG0071	NA	O	hsp20/alpha crystallin family protein [Mycobacterium colombiense CECT 3035] gi|400333513|gb|EJO91007.1| hsp20/alpha crystallin family protein [Mycobacterium colombiense CECT 3035]
M. shigaense_orf00662	472078	474603	+	841	80	0	0	0	COG1251	NA	C	nitrite reductase [NAD(P)H], large subunit [Mycobacterium intracellulare ATCC 13950]
M. shigaense_orf00663	474614	474982	+	122	60	0	0	0	COG2146	NA	P,R	nitrite reductase [NAD(P)H], small subunit [Mycobacterium colombiense CECT 3035] gi|400333511|gb|EJO91005.1| nitrite reductase [NAD(P)H], small subunit [Mycobacterium colombiense CECT 3035]
M. shigaense_orf00664	475457	475005	-	150	47	0	0	0	NA	NOG46615	NA	hypothetical protein MAP3704c [Mycobacterium avium subsp. paratuberculosis K-10] gi|254777342|ref|ZP_05218858.1| hypothetical protein MaviaA2_22106 [Mycobacterium avium subsp. avium ATCC 25291] gi|417748348|ref|ZP_12396791.1| hypothetical protein MAP ...
M. shigaense_orf00666	476237	475482	-	251	67	0	1	0	COG2138	NA	S	hypothetical protein MCOL_V202200 [Mycobacterium colombiense CECT 3035] gi|400333509|gb|EJO91003.1| hypothetical protein MCOL_V202200 [Mycobacterium colombiense CECT 3035]
M. shigaense_orf00667	477376	476231	-	381	62	0	0	0	COG1587;COG3710	NA	H,K	Putative transcriptional regulatory protein [Mycobacterium canettii CIPT 140070017] gi|432164872|emb|CCK62336.1| Putative transcriptional regulatory protein [Mycobacterium canettii CIPT 140070017]
M. shigaense_orf00668	477605	477411	-	64	52	0	0	0	NA	NA	NA	transporter, major facilitator family protein [Mycobacterium colombiense CECT 3035] gi|400333507|gb|EJO91001.1| transporter, major facilitator family protein [Mycobacterium colombiense CECT 3035]
M. shigaense_orf00670	479175	477754	-	473	83	0	0	0	COG2223	NA	P	Putative integral membrane nitrite extrusion protein NarK3 (nitrite facilitator) [Mycobacterium canettii CIPT 140070017] gi|432164873|emb|CCK62337.1| Putative integral membrane nitrite extrusion protein NarK3 (nitrite facilitator) [Mycobacterium cane ...
M. shigaense_orf00671	479393	479262	-	43	69	1	0	0	NA	NA	NA	NA
M. shigaense_orf00672	479952	479407	-	181	112	0	0	0	NA	NOG11240	R	Aminoglycoside 2'-N-acetyltransferase Aac (AAC(2')-IC) [Mycobacterium canettii CIPT 140070017] gi|432164874|emb|CCK62338.1| Aminoglycoside 2'-N-acetyltransferase Aac (AAC(2')-IC) [Mycobacterium canettii CIPT 140070017]
M. shigaense_orf00674	480905	479988	-	305	264	0	0	1	COG1984	NA	E	hypothetical protein OCQ_49080 [Mycobacterium intracellulare MOTT-64] gi|406033088|ref|YP_006731980.1| hypothetical protein MIP_07269 [Mycobacterium indicus pranii MTCC 9506] gi|378812285|gb|AFC56419.1| hypothetical protein OCQ_49080 [Mycobacterium i ...
M. shigaense_orf00676	481575	480919	-	218	521	0	0	0	COG2049	NA	E	allophanate hydrolase subunit 1 [Mycobacterium colombiense CECT 3035] gi|400333505|gb|EJO90999.1| allophanate hydrolase subunit 1 [Mycobacterium colombiense CECT 3035]
M. shigaense_orf00677	482693	481692	-	333	90	0	0	0	COG0614	NA	P	periplasmic binding protein [Mycobacterium intracellulare MOTT-02] gi|406033086|ref|YP_006731978.1| FecB2 [Mycobacterium indicus pranii MTCC 9506] gi|378807030|gb|AFC51165.1| periplasmic binding protein [Mycobacterium intracellulare MOTT-02] gi|40513 ...
M. shigaense_orf00679	484012	482783	-	409	89	0	0	0	COG3285	NA	L	hypothetical protein MCOL_V202160 [Mycobacterium colombiense CECT 3035] gi|400333501|gb|EJO90995.1| hypothetical protein MCOL_V202160 [Mycobacterium colombiense CECT 3035]
M. shigaense_orf00681	484072	485751	+	559	315	0	0	0	COG0318	NA	I,Q	acyl-CoA synthetase [Mycobacterium parascrofulaceum ATCC BAA-614] gi|295897168|gb|EFG76777.1| acyl-CoA synthetase [Mycobacterium parascrofulaceum ATCC BAA-614]
M. shigaense_orf00682	486183	485761	-	140	258	0	0	0	NA	NA	NA	hypothetical protein MaviaA2_22051 [Mycobacterium avium subsp. avium ATCC 25291]
M. shigaense_orf00685	486720	487073	+	117	100	1	0	0	NA	NA	NA	NA
M. shigaense_orf00688	489395	487197	-	732	153	0	0	0	COG1960	NA	I	fadE6 [Mycobacterium xenopi RIVM700367] gi|383331270|gb|EID09771.1| fadE6 [Mycobacterium xenopi RIVM700367]
M. shigaense_orf00690	490403	489447	-	318	49	0	0	0	COG1052;COG0111	NA	H,C,R,E	D-3-phosphoglycerate dehydrogenase [Mycobacterium ulcerans Agy99] gi|118569019|gb|ABL03770.1| D-3-phosphoglycerate dehydrogenase SerA3 [Mycobacterium ulcerans Agy99]
M. shigaense_orf00691	491527	490394	-	377	44	0	0	0	NA	NOG40459	S	hypothetical protein MaviaA2_22041 [Mycobacterium avium subsp. avium ATCC 25291]
M. shigaense_orf00692	492155	491529	-	208	51	0	0	0	NA	NOG83213	NA	hypothetical protein W7S_24045 [Mycobacterium sp. MOTT36Y] gi|417748332|ref|ZP_12396776.1| transcriptional regulator [Mycobacterium avium subsp. paratuberculosis S397] gi|443307964|ref|ZP_21037751.1| hypothetical protein W7U_19995 [Mycobacterium sp. ...
M. shigaense_orf00693	492277	492858	+	193	89	0	0	0	COG0346	NA	E	glyoxalase/bleomycin resistance protein/dioxygenase [Mycobacterium avium 104] gi|254777327|ref|ZP_05218843.1| glyoxalase/bleomycin resistance protein/dioxygenase [Mycobacterium avium subsp. avium ATCC 25291] gi|118163775|gb|ABK64672.1| glyoxalase/ble ...
M. shigaense_orf00694	492894	493442	+	182	82	0	1	0	NA	NOG221581	NA	hypothetical protein MCOL_V202125 [Mycobacterium colombiense CECT 3035] gi|400333494|gb|EJO90988.1| hypothetical protein MCOL_V202125 [Mycobacterium colombiense CECT 3035]
M. shigaense_orf00695	494058	493399	-	219	82	0	1	0	NA	NOG225401	NA	TetR family transcriptional regulator [Mycobacterium bovis AF2122/97] gi|121636188|ref|YP_976411.1| TetR family transcriptional regulator [Mycobacterium bovis BCG str. Pasteur 1173P2] gi|224988661|ref|YP_002643348.1| transcriptional regulatory protei ...
M. shigaense_orf00697	494245	495057	+	270	88	0	0	0	COG3662	NA	S	hypothetical protein MMAR_0537 [Mycobacterium marinum M] gi|183173891|gb|ACC39001.1| conserved hypothetical protein [Mycobacterium marinum M]
M. shigaense_orf00698	495151	496785	+	544	110	0	0	0	COG5651	NA	N	PPE family protein [Mycobacterium xenopi RIVM700367] gi|383336666|gb|EID15061.1| PPE family protein [Mycobacterium xenopi RIVM700367]
M. shigaense_orf00699	496945	497850	+	301	162	0	0	0	COG3315	NA	Q	methyltransferase, putative, family protein [Mycobacterium intracellulare ATCC 13950] gi|379764317|ref|YP_005350714.1| methyltransferase, putative, family protein [Mycobacterium intracellulare MOTT-64] gi|378801856|gb|AFC45992.1| methyltransferase, p ...
M. shigaense_orf00702	498015	499319	+	434	46	0	0	0	COG5651	NA	N	PPE family protein [Mycobacterium xenopi RIVM700367] gi|383336665|gb|EID15060.1| PPE family protein [Mycobacterium xenopi RIVM700367]
M. shigaense_orf00703	499316	499573	+	85	58	0	0	0	NA	NA	NA	hypothetical protein TMDG_02476, partial [Mycobacterium tuberculosis SUMu004] gi|308336023|gb|EFP24874.1| hypothetical protein TMDG_02476 [Mycobacterium tuberculosis SUMu004]
M. shigaense_orf00704	498056	497847	-	69	76	1	0	0	NA	NA	NA	NA
M. shigaense_orf00705	500147	502000	+	617	131	0	0	0	COG0464	NA	O	ATPase, AAA family protein [Mycobacterium avium subsp. avium ATCC 25291]
M. shigaense_orf00707	501997	503598	+	533	101	0	0	0	NA	NOG43783	S	hypothetical protein MCOL_V202025 [Mycobacterium colombiense CECT 3035] gi|400333474|gb|EJO90968.1| hypothetical protein MCOL_V202025 [Mycobacterium colombiense CECT 3035]
M. shigaense_orf00709	503595	507578	+	1327	104	0	0	0	COG1674	NA	D	hypothetical protein MCOL_V202020 [Mycobacterium colombiense CECT 3035] gi|400333473|gb|EJO90967.1| hypothetical protein MCOL_V202020 [Mycobacterium colombiense CECT 3035]
M. shigaense_orf00710	507696	507529	-	55	102	1	0	0	NA	NA	NA	NA
M. shigaense_orf00713	508159	509430	+	423	86	0	0	0	COG5651	NA	N	PPE family protein [Mycobacterium colombiense CECT 3035] gi|400333471|gb|EJO90965.1| PPE family protein [Mycobacterium colombiense CECT 3035]
M. shigaense_orf00714	508140	507877	-	87	577	1	0	0	NA	NA	NA	NA
M. shigaense_orf00715	509485	509778	+	97	287	0	0	0	NA	NOG13243	NA	hypothetical protein MCOL_V202005 [Mycobacterium colombiense CECT 3035] gi|400333470|gb|EJO90964.1| hypothetical protein MCOL_V202005 [Mycobacterium colombiense CECT 3035]
M. shigaense_orf00716	509806	510099	+	97	186	0	0	0	COG4842	NA	S	low molecular weight protein antigen 7 Cfp7 [Mycobacterium intracellulare ATCC 13950] gi|379749485|ref|YP_005340306.1| low molecular weight protein antigen 7 Cfp7 [Mycobacterium intracellulare ATCC 13950] gi|379756785|ref|YP_005345457.1| low molecula ...
M. shigaense_orf00718	510110	510988	+	292	153	0	0	0	NA	NOG10482	NA	DNA-binding protein [Mycobacterium parascrofulaceum ATCC BAA-614] gi|295898673|gb|EFG78221.1| DNA-binding protein [Mycobacterium parascrofulaceum ATCC BAA-614]
M. shigaense_orf00721	511051	512481	+	476	96	0	0	0	NA	NOG150659	NA	hypothetical protein OCU_47640 [Mycobacterium intracellulare ATCC 13950] gi|379764308|ref|YP_005350705.1| hypothetical protein OCQ_48730 [Mycobacterium intracellulare MOTT-64] gi|378801847|gb|AFC45983.1| hypothetical protein OCU_47640 [Mycobacterium ...
M. shigaense_orf00722	512478	513869	+	463	103	0	0	0	COG1404	NA	O	subtilase family protein [Mycobacterium sp. MOTT36Y] gi|443307939|ref|ZP_21037726.1| subtilase family protein [Mycobacterium sp. H4Y] gi|386791614|gb|AFJ37733.1| subtilase family protein [Mycobacterium sp. MOTT36Y] gi|442765307|gb|ELR83305.1| subtila ...
M. shigaense_orf00724	513866	514870	+	334	97	0	0	0	NA	NOG11033	NA	hypothetical protein OCO_47700 [Mycobacterium intracellulare MOTT-02] gi|378806997|gb|AFC51132.1| hypothetical protein OCO_47700 [Mycobacterium intracellulare MOTT-02]
M. shigaense_orf00725	516053	514857	-	398	76	0	0	0	NA	NOG43846;NOG43930	S	hypothetical protein MAP3789c [Mycobacterium avium subsp. paratuberculosis K-10] gi|440779244|ref|ZP_20957973.1| hypothetical protein D522_21606 [Mycobacterium avium subsp. paratuberculosis S5] gi|41398719|gb|AAS06339.1| hypothetical protein MAP_3789 ...
M. shigaense_orf00727	516163	516948	+	261	75	0	0	0	COG4106	NA	R	trans-aconitate 2-methyltransferase [Mycobacterium colombiense CECT 3035] gi|400333462|gb|EJO90956.1| trans-aconitate 2-methyltransferase [Mycobacterium colombiense CECT 3035]
M. shigaense_orf00728	518325	516961	-	454	57	0	0	0	COG3119	NA	P	Putative sulfatase [Mycobacterium canettii CIPT 140070017] gi|432164909|emb|CCK62373.1| Putative sulfatase [Mycobacterium canettii CIPT 140070017]
M. shigaense_orf00729	518449	519327	+	292	56	1	0	0	NA	NA	NA	5-valerolactone hydrolase [Streptomyces pristinaespiralis ATCC 25486] gi|197720030|gb|EDY63938.1| 5-valerolactone hydrolase [Streptomyces pristinaespiralis ATCC 25486]
M. shigaense_orf00730	519369	520016	+	215	82	1	0	0	NA	NA	NA	NA
M. shigaense_orf00732	520070	520351	+	93	72	0	0	0	NA	NOG138847	NA	hypothetical protein MAP3793 [Mycobacterium avium subsp. paratuberculosis K-10] gi|41398724|gb|AAS06343.1| hypothetical protein MAP_3793 [Mycobacterium avium subsp. paratuberculosis K-10]
M. shigaense_orf00733	520396	521292	+	298	61	0	0	0	COG0596	NOG245317	S,R	alpha/beta hydrolase [Mycobacterium avium subsp. paratuberculosis S5] gi|436724556|gb|ELP48247.1| alpha/beta hydrolase [Mycobacterium avium subsp. paratuberculosis S5]
M. shigaense_orf00734	521784	521302	-	160	87	0	0	0	NA	NOG46897	NA	conserved hypothetical protein [Mycobacterium parascrofulaceum ATCC BAA-614] gi|295897119|gb|EFG76731.1| conserved hypothetical protein [Mycobacterium parascrofulaceum ATCC BAA-614]
M. shigaense_orf00735	521843	522484	+	213	66	0	0	0	COG0671	NA	I	integral membrane protein [Mycobacterium ulcerans Agy99] gi|118569046|gb|ABL03797.1| Conserved integral membrane protein [Mycobacterium ulcerans Agy99]
M. shigaense_orf00736	522545	523225	+	226	237	0	0	0	COG3786	NA	S	hypothetical protein MAP3796 [Mycobacterium avium subsp. paratuberculosis K-10] gi|254777293|ref|ZP_05218809.1| hypothetical protein MaviaA2_21851 [Mycobacterium avium subsp. avium ATCC 25291] gi|440779252|ref|ZP_20957981.1| hypothetical protein D522 ...
M. shigaense_orf00737	523708	523229	-	159	197	0	0	0	NA	NOG46803	S	hypothetical protein MAV_4852 [Mycobacterium avium 104] gi|417748248|ref|ZP_12396694.1| hypothetical protein MAPs_42710 [Mycobacterium avium subsp. paratuberculosis S397] gi|118164293|gb|ABK65190.1| conserved hypothetical protein [Mycobacterium avium ...
M. shigaense_orf00738	524333	523713	-	206	91	0	1	0	NA	NOG73426;NOG67548	K	TetR family transcriptional regulator [Mycobacterium avium 104] gi|417748247|ref|ZP_12396693.1| transcriptional regulator [Mycobacterium avium subsp. paratuberculosis S397] gi|118163575|gb|ABK64472.1| transcriptional regulator, TetR family protein [M ...
M. shigaense_orf00739	524417	525595	+	392	95	0	0	0	NA	NOG46635	NA	hypothetical protein MCOL_V201920 [Mycobacterium colombiense CECT 3035] gi|400333453|gb|EJO90947.1| hypothetical protein MCOL_V201920 [Mycobacterium colombiense CECT 3035]
M. shigaense_orf00742	525749	527686	+	645	165	0	0	0	COG0443	NA	O	conserved hypothetical protein, partial [Mycobacterium parascrofulaceum ATCC BAA-614] gi|295897125|gb|EFG76737.1| conserved hypothetical protein [Mycobacterium parascrofulaceum ATCC BAA-614]
M. shigaense_orf00743	527779	528165	+	128	405	0	0	0	NA	NOG11907	NA	hypothetical protein MintA_18572 [Mycobacterium intracellulare ATCC 13950] gi|379756764|ref|YP_005345436.1| hypothetical protein OCO_47530 [Mycobacterium intracellulare MOTT-02] gi|379764291|ref|YP_005350688.1| hypothetical protein OCQ_48560 [Mycobac ...
M. shigaense_orf00744	528933	528181	-	250	264	0	0	0	NA	NOG240580	S	hypothetical protein OCU_47460 [Mycobacterium intracellulare ATCC 13950] gi|378801829|gb|AFC45965.1| hypothetical protein OCU_47460 [Mycobacterium intracellulare ATCC 13950]
M. shigaense_orf00745	528981	530009	+	342	159	0	0	0	COG2130	NA	R	possible 2-alkenal reductase [Mycobacterium parascrofulaceum ATCC BAA-614] gi|295897100|gb|EFG76713.1| possible 2-alkenal reductase [Mycobacterium parascrofulaceum ATCC BAA-614]
M. shigaense_orf00747	530665	530006	-	219	160	0	0	0	NA	NA	NA	hypothetical protein MCOL_V201855 [Mycobacterium colombiense CECT 3035] gi|400333440|gb|EJO90934.1| hypothetical protein MCOL_V201855 [Mycobacterium colombiense CECT 3035]
M. shigaense_orf00749	530782	531201	+	139	48	0	0	0	COG1846	NA	K	transcriptional regulatory protein [Mycobacterium xenopi RIVM700367] gi|383333692|gb|EID12140.1| transcriptional regulatory protein [Mycobacterium xenopi RIVM700367]
M. shigaense_orf00750	531220	532050	+	276	66	0	0	0	COG2273	NA	G	glycosyl hydrolase family 16, partial [Mycobacterium tuberculosis SUMu004] gi|308335988|gb|EFP24839.1| glycosyl hydrolase family 16 [Mycobacterium tuberculosis SUMu004]
M. shigaense_orf00752	532178	533011	+	277	62	0	1	0	COG2273	NA	G	beta-1,3-glucanase precursor [Mycobacterium parascrofulaceum ATCC BAA-614] gi|295897101|gb|EFG76714.1| beta-1,3-glucanase precursor [Mycobacterium parascrofulaceum ATCC BAA-614]
M. shigaense_orf00755	534535	533015	-	506	56	0	1	0	COG5305	NA	S	hypothetical protein OCU_47430 [Mycobacterium intracellulare ATCC 13950] gi|378801826|gb|AFC45962.1| hypothetical protein OCU_47430 [Mycobacterium intracellulare ATCC 13950]
M. shigaense_orf00756	534829	534605	-	74	82	0	0	0	NA	NA	NA	hypothetical protein HMPREF0591_3377 [Mycobacterium parascrofulaceum ATCC BAA-614] gi|295897103|gb|EFG76716.1| hypothetical protein HMPREF0591_3377 [Mycobacterium parascrofulaceum ATCC BAA-614]
M. shigaense_orf00757	535186	534959	-	75	63	0	0	0	NA	NA	NA	hypothetical protein [Mycobacterium rhodesiae NBB3] gi|359821173|gb|AEV73986.1| hypothetical protein MycrhN_3466 [Mycobacterium rhodesiae NBB3]
M. shigaense_orf00758	535353	535598	+	81	73	0	0	0	NA	NOG139344	NA	conserved hypothetical protein [Mycobacterium parascrofulaceum ATCC BAA-614] gi|295897104|gb|EFG76717.1| conserved hypothetical protein [Mycobacterium parascrofulaceum ATCC BAA-614]
M. shigaense_orf00759	535641	536312	+	223	78	0	0	0	NA	NOG48124	S	hypothetical protein MUL_4034 [Mycobacterium ulcerans Agy99] gi|183984929|ref|YP_001853220.1| hypothetical protein MMAR_4961 [Mycobacterium marinum M] gi|118571340|gb|ABL06091.1| conserved membrane protein [Mycobacterium ulcerans Agy99] gi|183178255| ...
M. shigaense_orf00760	537098	536325	-	257	48	0	0	0	NA	NA	NA	hypothetical protein MCOL_V201825 [Mycobacterium colombiense CECT 3035] gi|400333434|gb|EJO90928.1| hypothetical protein MCOL_V201825 [Mycobacterium colombiense CECT 3035]
M. shigaense_orf00764	537143	538633	+	496	73	0	0	0	COG1597	NOG121460	I,R	PAP2 superfamily protein [Mycobacterium intracellulare MOTT-02] gi|378806971|gb|AFC51106.1| PAP2 superfamily protein [Mycobacterium intracellulare MOTT-02]
M. shigaense_orf00765	539403	538651	-	250	77	0	0	0	COG1073	NA	R	hydrolytic protein [Mycobacterium marinum M] gi|443489031|ref|YP_007367178.1| hydrolase of the alpha/beta superfamily protein [Mycobacterium liflandii 128FXT] gi|183173929|gb|ACC39039.1| conserved hypothetical hydrolytic protein [Mycobacterium marinu ...
M. shigaense_orf00767	539813	540328	+	171	252	0	0	0	NA	NA	NA	hypothetical protein MAP3811 [Mycobacterium avium subsp. paratuberculosis K-10] gi|41398742|gb|AAS06361.1| hypothetical protein MAP_3811 [Mycobacterium avium subsp. paratuberculosis K-10]
M. shigaense_orf00768	541264	540458	-	268	177	0	0	0	COG1376	NA	S	hypothetical protein MAP3812c [Mycobacterium avium subsp. paratuberculosis K-10] gi|417748230|ref|ZP_12396676.1| hypothetical protein MAPs_42530 [Mycobacterium avium subsp. paratuberculosis S397] gi|440779272|ref|ZP_20957999.1| hypothetical protein D ...
M. shigaense_orf00770	542724	541399	-	441	93	0	0	0	COG2114	NA	T	putative hydrolase or acyltransferase of alpha/beta superfamily [Mycobacterium smegmatis JS623] gi|433296198|gb|AGB22018.1| putative hydrolase or acyltransferase of alpha/beta superfamily [Mycobacterium smegmatis JS623]
M. shigaense_orf00771	543022	542744	-	92	299	1	0	0	NA	NOG84984	K	transcriptional regulator, HxlR family [Mycobacterium tusciae JS617] gi|373549577|gb|EHP76240.1| transcriptional regulator, HxlR family [Mycobacterium tusciae JS617]
M. shigaense_orf00772	543120	543677	+	185	38	1	0	0	COG2128	NA	S	hypothetical protein [Mycobacterium rhodesiae NBB3] gi|359822917|gb|AEV75730.1| hypothetical protein MycrhN_5255 [Mycobacterium rhodesiae NBB3]
M. shigaense_orf00773	544539	543736	-	267	125	0	0	0	COG1028	NA	I,Q,R	carveol-like dehydrogenase [Mycobacterium colombiense CECT 3035] gi|400333426|gb|EJO90920.1| carveol-like dehydrogenase [Mycobacterium colombiense CECT 3035]
M. shigaense_orf00774	545724	544615	-	369	495	0	0	0	NA	NOG44755	S	conserved hypothetical protein [Mycobacterium parascrofulaceum ATCC BAA-614] gi|295895005|gb|EFG74724.1| conserved hypothetical protein [Mycobacterium parascrofulaceum ATCC BAA-614]
M. shigaense_orf00775	545934	546308	+	124	48	0	0	0	NA	NA	NA	NA
M. shigaense_orf00777	547765	546449	-	438	71	0	0	0	COG0596;COG2114	NA	R,T	family 3 adenylate cyclase [Mycobacterium smegmatis JS623] gi|433294915|gb|AGB20735.1| family 3 adenylate cyclase [Mycobacterium smegmatis JS623]
M. shigaense_orf00778	548204	548851	+	215	129	0	1	0	NA	NOG08334;NOG279689	S	hypothetical protein MAP3819 [Mycobacterium avium subsp. paratuberculosis K-10] gi|41398750|gb|AAS06369.1| hypothetical protein MAP_3819 [Mycobacterium avium subsp. paratuberculosis K-10]
M. shigaense_orf00779	548893	549465	+	190	81	0	0	1	COG0717	NA	F	deoxycytidine triphosphate deaminase [Mycobacterium intracellulare ATCC 13950] gi|379749428|ref|YP_005340249.1| deoxycytidine triphosphate deaminase [Mycobacterium intracellulare ATCC 13950] gi|379756746|ref|YP_005345418.1| deoxycytidine triphosphate ...
M. shigaense_orf00781	549574	551454	+	626	89	0	0	0	NA	NA	NA	hypothetical protein MIP_07159 [Mycobacterium indicus pranii MTCC 9506] gi|405131564|gb|AFS16819.1| Hypothetical protein MIP_07159 [Mycobacterium indicus pranii MTCC 9506]
M. shigaense_orf00784	551610	553067	+	485	135	0	0	0	NA	NOG268507;NOG291819	NA	hypothetical protein MAP3824 [Mycobacterium avium subsp. paratuberculosis K-10] gi|41398755|gb|AAS06374.1| hypothetical protein MAP_3824 [Mycobacterium avium subsp. paratuberculosis K-10]
M. shigaense_orf00785	553165	554490	+	441	53	0	0	0	COG1004	NA	M	UDP-glucose 6-dehydrogenase [Mycobacterium colombiense CECT 3035] gi|400333417|gb|EJO90911.1| UDP-glucose 6-dehydrogenase [Mycobacterium colombiense CECT 3035]
M. shigaense_orf00787	554516	555271	+	251	83	0	0	0	NA	NOG13505	NA	hypothetical protein OCQ_48290 [Mycobacterium intracellulare MOTT-64] gi|378812207|gb|AFC56341.1| hypothetical protein OCQ_48290 [Mycobacterium intracellulare MOTT-64]
M. shigaense_orf00789	555325	555687	+	120	104	0	0	0	NA	NOG47129	NA	conserved hypothetical protein [Mycobacterium parascrofulaceum ATCC BAA-614] gi|295897059|gb|EFG76677.1| conserved hypothetical protein [Mycobacterium parascrofulaceum ATCC BAA-614]
M. shigaense_orf00790	555705	556571	+	288	82	0	0	1	COG1209	NA	M	glucose-1-phosphate thymidylyltransferase [Mycobacterium parascrofulaceum ATCC BAA-614] gi|295897060|gb|EFG76678.1| glucose-1-phosphate thymidylyltransferase [Mycobacterium parascrofulaceum ATCC BAA-614]
M. shigaense_orf00791	557793	556522	-	423	105	0	0	0	COG5438	NA	S	hypothetical protein OCQ_48260 [Mycobacterium intracellulare MOTT-64] gi|378812204|gb|AFC56338.1| hypothetical protein OCQ_48260 [Mycobacterium intracellulare MOTT-64]
M. shigaense_orf00793	559087	557825	-	420	260	0	0	1	COG0436	NA	E	aminotransferase AlaT [Mycobacterium avium subsp. paratuberculosis K-10] gi|41398761|gb|AAS06380.1| AspC [Mycobacterium avium subsp. paratuberculosis K-10]
M. shigaense_orf00794	562018	559145	-	957	111	0	0	0	COG0247	NA	C	ferredoxin, 4Fe-4S [Mycobacterium avium 104] gi|118163872|gb|ABK64769.1| ferredoxin, 4Fe-4S [Mycobacterium avium 104]
M. shigaense_orf00797	564595	562121	-	824	108	0	0	0	NA	NA	NA	Putative transcriptional regulatory protein [Mycobacterium canettii CIPT 140070017] gi|432164947|emb|CCK62412.1| Putative transcriptional regulatory protein [Mycobacterium canettii CIPT 140070017]
M. shigaense_orf00798	564766	565305	+	179	90	0	0	0	NA	NA	NA	hypothetical protein MUL_0578 [Mycobacterium ulcerans Agy99] gi|443489054|ref|YP_007367201.1| hypothetical protein MULP_00607 [Mycobacterium liflandii 128FXT] gi|118568508|gb|ABL03259.1| conserved hypothetical protein [Mycobacterium ulcerans Agy99] g ...
M. shigaense_orf00800	566437	566120	-	105	60	1	0	0	NA	NA	NA	NA
M. shigaense_orf00801	566701	566450	-	83	59	1	0	0	NA	NA	NA	NA
M. shigaense_orf00802	566688	567140	+	150	69	1	0	0	NA	NA	NA	NA
M. shigaense_orf00804	567198	569039	+	613	67	0	0	0	COG0699	NA	R	hypothetical protein MUL_0580 [Mycobacterium ulcerans Agy99] gi|118568510|gb|ABL03261.1| conserved hypothetical protein IniA [Mycobacterium ulcerans Agy99]
M. shigaense_orf00806	569036	570535	+	499	66	0	0	0	COG0699	NA	R	Putative GTPase, isoniazid inductible gene protein IniC [Mycobacterium canettii CIPT 140070010] gi|433640469|ref|YP_007286228.1| Putative GTPase, isoniazid inductible gene protein IniC [Mycobacterium canettii CIPT 140070008] gi|432157017|emb|CCK54288 ...
M. shigaense_orf00809	572205	570532	-	557	93	0	0	0	COG0443	NA	O	hypothetical protein MCOL_V201690 [Mycobacterium colombiense CECT 3035] gi|400333407|gb|EJO90901.1| hypothetical protein MCOL_V201690 [Mycobacterium colombiense CECT 3035]
M. shigaense_orf00810	572885	573112	+	75	212	1	0	0	NA	NA	NA	NA
M. shigaense_orf00811	572732	572262	-	156	172	0	0	0	NA	NA	NA	hypothetical protein MUL_0583 [Mycobacterium ulcerans Agy99] gi|118568513|gb|ABL03264.1| conserved threonine-rich hypothetical protein [Mycobacterium ulcerans Agy99]
M. shigaense_orf00815	573924	573343	-	193	115	0	0	0	NA	NOG41376	NA	lpqJ [Mycobacterium colombiense CECT 3035] gi|400333402|gb|EJO90896.1| lpqJ [Mycobacterium colombiense CECT 3035]
M. shigaense_orf00816	574979	574029	-	316	67	0	0	0	NA	NA	NA	amidohydrolase [Mycobacterium colombiense CECT 3035] gi|400333401|gb|EJO90895.1| amidohydrolase [Mycobacterium colombiense CECT 3035]
M. shigaense_orf00817	576477	574987	-	496	46	0	0	0	COG1012	NA	C	aldehyde dehydrogenase [Mycobacterium colombiense CECT 3035] gi|400333400|gb|EJO90894.1| aldehyde dehydrogenase [Mycobacterium colombiense CECT 3035]
M. shigaense_orf00818	576564	577505	+	313	90	0	0	0	NA	NA	NA	LysR family transcriptional regulator [Mycobacterium colombiense CECT 3035] gi|400333399|gb|EJO90893.1| LysR family transcriptional regulator [Mycobacterium colombiense CECT 3035]
M. shigaense_orf00821	578601	577459	-	380	61	0	0	0	NA	NOG42751	R	Conserved protein of unknown function [Mycobacterium canettii CIPT 140070010] gi|432162978|emb|CCK60370.1| Conserved protein of unknown function [Mycobacterium canettii CIPT 140070010]
M. shigaense_orf00822	579917	578598	-	439	84	0	0	0	COG2124	NA	Q	putative cytochrome P450 128 CYP128 [Mycobacterium canettii CIPT 140010059] gi|433627392|ref|YP_007261021.1| Putative cytochrome P450 128 cyp128 [Mycobacterium canettii CIPT 140060008] gi|433642457|ref|YP_007288216.1| Putative cytochrome P450 128 cyp ...
M. shigaense_orf00823	580350	582218	+	622	775	0	0	1	COG0443	NA	O	molecular chaperone DnaK [Mycobacterium gilvum PYR-GCK] gi|315442181|ref|YP_004075060.1| chaperone protein DnaK [Mycobacterium gilvum Spyr1] gi|189027811|sp|A4T112.1|DNAK_MYCGI RecName: Full=Chaperone protein DnaK; AltName: Full=HSP70; AltName: Full= ...
M. shigaense_orf00825	582215	582844	+	209	506	0	0	0	COG0576	NA	O	chaperone GrpE [Mycobacterium parascrofulaceum ATCC BAA-614] gi|295897038|gb|EFG76658.1| chaperone GrpE [Mycobacterium parascrofulaceum ATCC BAA-614]
M. shigaense_orf00827	582921	584102	+	393	375	0	0	1	COG0484	NA	O	DnaJ [Mycobacterium lentiflavum]
M. shigaense_orf00828	584102	584488	+	128	200	0	0	1	COG0789	NA	K	transcriptional regulator, MerR family protein [Mycobacterium intracellulare ATCC 13950] gi|379749402|ref|YP_005340223.1| MerR family transcriptional regulator [Mycobacterium intracellulare ATCC 13950] gi|379756722|ref|YP_005345394.1| MerR family tra ...
M. shigaense_orf00829	584591	585766	+	391	106	0	0	0	NA	NA	NA	hypothetical protein MXEN_17737 [Mycobacterium xenopi RIVM700367] gi|383332096|gb|EID10580.1| hypothetical protein MXEN_17737 [Mycobacterium xenopi RIVM700367]
M. shigaense_orf00830	585763	586578	+	271	65	1	0	0	NA	NA	NA	hypothetical protein MXEN_17742 [Mycobacterium xenopi RIVM700367] gi|383332097|gb|EID10581.1| hypothetical protein MXEN_17742 [Mycobacterium xenopi RIVM700367]
M. shigaense_orf00831	589777	586595	-	1060	57	0	0	0	COG2114	NA	T	adenylyl cyclase class-3/4/guanylyl cyclase [Mycobacterium xenopi RIVM700367] gi|383332098|gb|EID10582.1| adenylyl cyclase class-3/4/guanylyl cyclase [Mycobacterium xenopi RIVM700367]
M. shigaense_orf00832	590757	589867	-	296	71	0	0	0	COG2017	NOG283441	G	hypothetical protein MCOL_V201620 [Mycobacterium colombiense CECT 3035] gi|400333393|gb|EJO90887.1| hypothetical protein MCOL_V201620 [Mycobacterium colombiense CECT 3035]
M. shigaense_orf00833	591955	590786	-	389	62	0	0	0	COG0543	NA	H,C	hypothetical protein MintA_09716 [Mycobacterium intracellulare ATCC 13950] gi|379749400|ref|YP_005340221.1| hypothetical protein OCU_46810 [Mycobacterium intracellulare ATCC 13950] gi|379756720|ref|YP_005345392.1| hypothetical protein OCO_47080 [Myco ...
M. shigaense_orf00835	592159	594705	+	848	658	0	0	1	COG0542	NA	O	chaperone protein ClpB [Mycobacterium parascrofulaceum ATCC BAA-614] gi|295897045|gb|EFG76665.1| chaperone protein ClpB [Mycobacterium parascrofulaceum ATCC BAA-614]
M. shigaense_orf00838	595610	594795	-	271	213	0	0	0	COG1024	NA	I	enoyl-CoA hydratase, EchA8 [Mycobacterium marinum M] gi|183173997|gb|ACC39107.1| enoyl-CoA hydratase, EchA8_1 [Mycobacterium marinum M]
M. shigaense_orf00840	595710	596555	+	281	618	0	0	1	NA	NOG08697	S	hypothetical protein MAP3855 [Mycobacterium avium subsp. paratuberculosis K-10] gi|118464891|ref|YP_883919.1| hypothetical protein MAV_4792 [Mycobacterium avium 104] gi|417748178|ref|ZP_12396627.1| hypothetical protein MAPs_42030 [Mycobacterium avium ...
M. shigaense_orf00841	596602	597135	+	177	164	0	0	0	COG0461	NA	F	orotate phosphoribosyltransferase [Mycobacterium intracellulare ATCC 13950]
M. shigaense_orf00843	597149	598048	+	299	125	0	0	0	NA	NOG46443	NA	hypothetical protein MIP_07112 [Mycobacterium indicus pranii MTCC 9506] gi|405131530|gb|AFS16785.1| Hypothetical protein MIP_07112 [Mycobacterium indicus pranii MTCC 9506]
M. shigaense_orf00844	598033	598695	+	220	113	0	0	1	COG0566	NA	J	spou rRNA methylase family protein [Mycobacterium avium subsp. avium ATCC 25291]
M. shigaense_orf00845	599584	598805	-	259	103	0	0	0	COG4302	NA	E	ethanolamine ammonia-lyase small subunit [Mycobacterium ulcerans Agy99] gi|118568119|gb|ABL02870.1| ethanolamine ammonia-lyase light chain, EutC [Mycobacterium ulcerans Agy99]
M. shigaense_orf00846	600990	599584	-	468	71	0	0	0	COG4303	NA	E	ethanolamine ammonia-lyase large subunit, EutB [Mycobacterium marinum M] gi|443489093|ref|YP_007367240.1| ethanolamine ammonia-lyase large subunit, EutB [Mycobacterium liflandii 128FXT] gi|183174015|gb|ACC39125.1| ethanolamine ammonia-lyase large sub ...
M. shigaense_orf00847	601039	602184	+	381	63	0	0	0	COG4833	NA	G	hypothetical protein MintA_23269 [Mycobacterium intracellulare ATCC 13950] gi|379749390|ref|YP_005340211.1| hypothetical protein OCU_46710 [Mycobacterium intracellulare ATCC 13950] gi|379756710|ref|YP_005345382.1| hypothetical protein OCO_46980 [Myco ...
M. shigaense_orf00849	602181	604142	+	653	93	0	0	0	NA	NA	NA	acetoacetyl-coenzyme A synthetase [Mycobacterium parascrofulaceum ATCC BAA-614] gi|295897007|gb|EFG76629.1| acetoacetyl-coenzyme A synthetase [Mycobacterium parascrofulaceum ATCC BAA-614]
M. shigaense_orf00850	604775	604098	-	225	107	0	0	0	COG0586	NA	S	hypothetical protein MIP_07105 [Mycobacterium indicus pranii MTCC 9506] gi|405131526|gb|AFS16781.1| Hypothetical protein MIP_07105 [Mycobacterium indicus pranii MTCC 9506]
M. shigaense_orf00851	604891	605925	+	344	135	0	0	0	COG0191	NA	G	fructose-bisphosphate aldolase [Mycobacterium marinum M] gi|443489094|ref|YP_007367241.1| fructose-bisphosphate aldolase, Fba [Mycobacterium liflandii 128FXT] gi|183174020|gb|ACC39130.1| fructose-bisphosphate aldolase, Fba [Mycobacterium marinum M] g ...
M. shigaense_orf00852	606878	606006	-	290	168	0	0	0	NA	NOG10960	NA	hypothetical protein MCOL_V201535 [Mycobacterium colombiense CECT 3035] gi|400333376|gb|EJO90870.1| hypothetical protein MCOL_V201535 [Mycobacterium colombiense CECT 3035]
M. shigaense_orf00854	606932	607345	+	137	220	0	0	1	NA	NOG06563	NA	hypothetical protein MCOL_V201530 [Mycobacterium colombiense CECT 3035] gi|400333375|gb|EJO90869.1| hypothetical protein MCOL_V201530 [Mycobacterium colombiense CECT 3035]
M. shigaense_orf00855	608181	607342	-	279	155	0	0	0	COG1230	NA	P	hypothetical protein OCU_46650 [Mycobacterium intracellulare ATCC 13950] gi|378801748|gb|AFC45884.1| hypothetical protein OCU_46650 [Mycobacterium intracellulare ATCC 13950]
M. shigaense_orf00857	609062	608283	-	259	86	0	0	0	COG1994	NA	R	hypothetical protein MMAR_0678 [Mycobacterium marinum M] gi|183174029|gb|ACC39139.1| conserved hypothetical membrane protein [Mycobacterium marinum M]
M. shigaense_orf00858	609734	609072	-	220	58	0	0	0	NA	NOG07403	NA	hypothetical protein W7S_23535 [Mycobacterium sp. MOTT36Y] gi|386791537|gb|AFJ37656.1| hypothetical protein W7S_23535 [Mycobacterium sp. MOTT36Y]
M. shigaense_orf00860	609815	611113	+	432	108	0	0	1	COG0104	NA	F	adenylosuccinate synthetase [Mycobacterium avium subsp. avium ATCC 25291]
M. shigaense_orf00861	611110	611763	+	217	79	0	0	0	NA	NOG09164	NA	thioesterase family protein [Mycobacterium colombiense CECT 3035] gi|400333369|gb|EJO90863.1| thioesterase family protein [Mycobacterium colombiense CECT 3035]
M. shigaense_orf00863	611817	613049	+	410	122	0	0	0	COG0027	NA	F	phosphoribosylglycinamide formyltransferase 2 [Mycobacterium tuberculosis T46] gi|289445926|ref|ZP_06435670.1| phosphoribosylglycinamide formyltransferase 2 purT [Mycobacterium tuberculosis CPHL_A] gi|289568301|ref|ZP_06448528.1| phosphoribosylglycin ...
M. shigaense_orf00864	613069	613485	+	138	178	0	0	0	COG0607	NA	P	hypothetical protein MCOL_V201490 [Mycobacterium colombiense CECT 3035] gi|400333367|gb|EJO90861.1| hypothetical protein MCOL_V201490 [Mycobacterium colombiense CECT 3035]
M. shigaense_orf00865	613493	614722	+	409	124	0	0	0	COG0626	NA	E	O-succinylhomoserine sulfhydrylase [Mycobacterium parascrofulaceum ATCC BAA-614] gi|295896976|gb|EFG76599.1| O-succinylhomoserine sulfhydrylase [Mycobacterium parascrofulaceum ATCC BAA-614]
M. shigaense_orf00866	616155	614719	-	478	99	0	0	0	COG1252	NA	C	NADH dehydrogenase Ndh [Mycobacterium xenopi RIVM700367] gi|383331010|gb|EID09529.1| NADH dehydrogenase Ndh [Mycobacterium xenopi RIVM700367]
M. shigaense_orf00867	616395	616198	-	65	51	1	0	0	NA	NA	NA	NA
M. shigaense_orf00870	616594	616986	+	130	50	1	0	0	NA	NA	NA	NA
M. shigaense_orf00871	617565	617029	-	178	69	1	0	0	NA	NA	NA	hypothetical protein YM304_31410 [Ilumatobacter coccineum YM16-304] gi|464100573|dbj|BAN03455.1| hypothetical protein YM304_31410 [Ilumatobacter coccineum YM16-304]
M. shigaense_orf00872	617726	618475	+	249	52	0	0	0	NA	NA	NA	hypothetical protein MMAR_3090 [Mycobacterium marinum M] gi|183176415|gb|ACC41525.1| conserved hypothetical protein [Mycobacterium marinum M]
M. shigaense_orf00873	618505	619410	+	301	103	0	0	0	COG0596	NA	R	haloalkane dehalogenase [Caulobacter sp. K31] gi|189083120|sp|B0SY51.1|DHMA_CAUSK RecName: Full=Haloalkane dehalogenase gi|167349063|gb|ABZ71798.1| alpha/beta hydrolase fold [Caulobacter sp. K31]
M. shigaense_orf00874	619993	619424	-	189	133	0	0	0	NA	NA	NA	Conserved secreted protein of unknown function [Mycobacterium canettii CIPT 140070010] gi|432161076|emb|CCK58411.1| Conserved secreted protein of unknown function [Mycobacterium canettii CIPT 140070010]
M. shigaense_orf00876	621284	621655	+	123	105	0	0	0	NA	NOG41398	S	hypothetical protein MUL_2824 [Mycobacterium ulcerans Agy99] gi|183980722|ref|YP_001849013.1| hypothetical protein MMAR_0699 [Mycobacterium marinum M] gi|443489130|ref|YP_007367277.1| putative membrane protein [Mycobacterium liflandii 128FXT] gi|1185 ...
M. shigaense_orf00877	621247	620063	-	394	83	0	0	0	COG1960	NA	I	putative acyl-CoA dehydrogenase [Mycobacterium intracellulare MOTT-64] gi|378812158|gb|AFC56292.1| putative acyl-CoA dehydrogenase [Mycobacterium intracellulare MOTT-64]
M. shigaense_orf00878	621663	622604	+	313	66	0	0	0	COG3315	NA	Q	methyltransferase, putative, family protein [Mycobacterium colombiense CECT 3035] gi|400333359|gb|EJO90853.1| methyltransferase, putative, family protein [Mycobacterium colombiense CECT 3035]
M. shigaense_orf00880	622612	623100	+	162	100	0	0	0	NA	NOG282693	NA	hypothetical protein MUL_2823 [Mycobacterium ulcerans Agy99] gi|183980723|ref|YP_001849014.1| hypothetical protein MMAR_0700 [Mycobacterium marinum M] gi|443489132|ref|YP_007367279.1| Putative acetyltransferase [Mycobacterium liflandii 128FXT] gi|118 ...
M. shigaense_orf00882	623097	624191	+	364	72	0	0	0	COG2141	NA	C	oxidoreductase [Mycobacterium marinum M] gi|183174050|gb|ACC39160.1| conserved hypothetical oxidoreductase [Mycobacterium marinum M]
M. shigaense_orf00883	624188	625306	+	372	71	0	0	0	COG2141	NA	C	luciferase family monooxygenase [Mycobacterium smegmatis MKD8] gi|440629834|gb|ELQ91615.1| luciferase family monooxygenase [Mycobacterium smegmatis MKD8]
M. shigaense_orf00885	625303	626640	+	445	65	0	0	0	COG2141	NA	C	FMNH2-utilizing oxygenase [Mycobacterium marinum M] gi|443489135|ref|YP_007367282.1| FMNH2-utilizing oxygenase [Mycobacterium liflandii 128FXT] gi|183174052|gb|ACC39162.1| FMNH2-utilizing oxygenase [Mycobacterium marinum M] gi|442581632|gb|AGC60775.1 ...
M. shigaense_orf00886	626962	626615	-	115	71	0	0	0	COG1742	NA	S	hypothetical protein RHA1_ro06609 [Rhodococcus jostii RHA1] gi|397736992|ref|ZP_10503667.1| hypothetical protein JVH1_8266 [Rhodococcus sp. JVH1] gi|123144160|sp|Q0S254.1|Y6609_RHOSR RecName: Full=UPF0060 membrane protein RHA1_ro06609 gi|110823098|gb ...
M. shigaense_orf00887	627796	628806	+	336	173	0	0	1	COG2141	NA	C	F420-dependent methylene-tetrahydromethanopterin reductase [Mycobacterium colombiense CECT 3035] gi|400333356|gb|EJO90850.1| F420-dependent methylene-tetrahydromethanopterin reductase [Mycobacterium colombiense CECT 3035]
M. shigaense_orf00888	627720	626959	-	253	76	0	0	0	COG0491	NA	R	metallo-beta-lactamase superfamily protein [Mycobacterium parascrofulaceum ATCC BAA-614] gi|295896988|gb|EFG76611.1| metallo-beta-lactamase superfamily protein [Mycobacterium parascrofulaceum ATCC BAA-614]
M. shigaense_orf00889	628818	630902	+	694	78	0	0	0	COG0280;COG0857	NA	C,R	phosphate acetyltransferase [Mycobacterium marinum M] gi|183174059|gb|ACC39169.1| phosphate acetyltransferase Pta [Mycobacterium marinum M]
M. shigaense_orf00891	630907	632043	+	378	53	0	0	0	COG0282	NA	C	acetate kinase A/propionate kinase 2 [Mycobacterium xenopi RIVM700367] gi|383331035|gb|EID09554.1| acetate kinase A/propionate kinase 2 [Mycobacterium xenopi RIVM700367]
M. shigaense_orf00892	633231	632032	-	399	59	0	0	0	COG4102	NA	S	hypothetical protein MaviaA2_21354 [Mycobacterium avium subsp. avium ATCC 25291] gi|40806716|gb|AAR92167.1| hypothetical protein [Mycobacterium avium subsp. avium ATCC 25291]
M. shigaense_orf00893	634520	633243	-	425	66	0	0	0	COG5267	NA	S	hypothetical protein D522_22198 [Mycobacterium avium subsp. paratuberculosis S5] gi|436720148|gb|ELP44446.1| hypothetical protein D522_22198 [Mycobacterium avium subsp. paratuberculosis S5]
M. shigaense_orf00894	634675	635529	+	284	58	0	0	0	NA	NOG39925	S	conserved hypothetical protein [Mycobacterium parascrofulaceum ATCC BAA-614] gi|295896992|gb|EFG76615.1| conserved hypothetical protein [Mycobacterium parascrofulaceum ATCC BAA-614]
M. shigaense_orf00896	638006	635685	-	773	95	0	0	1	COG0515	NA	K,R,T,L	serine/threonine-protein kinase PKNG [Mycobacterium canettii CIPT 140010059] gi|433640529|ref|YP_007286288.1| Putative serine/threonine-protein kinase PknG [Mycobacterium canettii CIPT 140070008] gi|340003625|emb|CCC42748.1| serine/threonine-protein ...
M. shigaense_orf00898	638977	638006	-	323	122	0	0	1	COG0834	NA	E,T	glutamine-binding protein [Mycobacterium leprae TN] gi|221229552|ref|YP_002502968.1| glutamine-binding protein [Mycobacterium leprae Br4923] gi|13092622|emb|CAC29811.1| putative glutamine-binding protein [Mycobacterium leprae] gi|219932659|emb|CAR703 ...
M. shigaense_orf00899	640293	638974	-	439	174	0	0	0	NA	NOG06583	NA	hypothetical protein MCOL_V201395 [Mycobacterium colombiense CECT 3035] gi|400333348|gb|EJO90842.1| hypothetical protein MCOL_V201395 [Mycobacterium colombiense CECT 3035]
M. shigaense_orf00902	640452	641060	+	202	183	0	0	0	COG0494	NA	R,L	ADP-ribose pyrophosphatase [Mycobacterium avium subsp. paratuberculosis S397] gi|336460363|gb|EGO39263.1| ADP-ribose pyrophosphatase [Mycobacterium avium subsp. paratuberculosis S397]
M. shigaense_orf00903	641712	641032	-	226	85	0	0	1	COG0352	NA	H	thiamine-phosphate pyrophosphorylase [Mycobacterium intracellulare ATCC 13950] gi|379749351|ref|YP_005340172.1| thiamine-phosphate pyrophosphorylase [Mycobacterium intracellulare ATCC 13950] gi|379764201|ref|YP_005350598.1| thiamine-phosphate pyropho ...
M. shigaense_orf00905	641858	642898	+	346	122	0	0	0	COG0665	NA	E	glycine oxidase ThiO [Mycobacterium intracellulare ATCC 13950] gi|379756672|ref|YP_005345344.1| glycine oxidase ThiO [Mycobacterium intracellulare MOTT-02] gi|379764200|ref|YP_005350597.1| glycine oxidase ThiO [Mycobacterium intracellulare MOTT-64] g ...
M. shigaense_orf00906	642895	643104	+	69	96	0	0	0	COG2104	NA	H	sulfur carrier protein ThiS [Mycobacterium intracellulare ATCC 13950] gi|379749349|ref|YP_005340170.1| sulfur carrier protein ThiS [Mycobacterium intracellulare ATCC 13950] gi|379756671|ref|YP_005345343.1| sulfur carrier protein ThiS [Mycobacterium i ...
M. shigaense_orf00908	643097	643852	+	251	82	0	0	1	COG2022	NA	H	thiazole synthase [Mycobacterium avium 104] gi|254777183|ref|ZP_05218699.1| thiazole synthase [Mycobacterium avium subsp. avium ATCC 25291] gi|166228961|sp|A0QLT3.1|THIG_MYCA1 RecName: Full=Thiazole synthase gi|118164952|gb|ABK65849.1| thiazole biosy ...
M. shigaense_orf00909	643849	644616	+	255	63	0	0	0	NA	NOG285679;NOG16975	R	hypothetical protein OCU_46280 [Mycobacterium intracellulare ATCC 13950] gi|378801711|gb|AFC45847.1| hypothetical protein OCU_46280 [Mycobacterium intracellulare ATCC 13950]
M. shigaense_orf00910	645142	644621	-	173	122	0	0	0	NA	NA	NA	conserved hypothetical protein [Mycobacterium parascrofulaceum ATCC BAA-614] gi|295896963|gb|EFG76587.1| conserved hypothetical protein [Mycobacterium parascrofulaceum ATCC BAA-614]
M. shigaense_orf00911	645741	645220	-	173	74	0	0	0	NA	NA	NA	conserved hypothetical protein [Mycobacterium parascrofulaceum ATCC BAA-614] gi|295896963|gb|EFG76587.1| conserved hypothetical protein [Mycobacterium parascrofulaceum ATCC BAA-614]
M. shigaense_orf00912	645801	646226	+	141	76	0	0	0	NA	NOG07295	S	hypothetical protein W7U_19320 [Mycobacterium sp. H4Y] gi|442765197|gb|ELR83195.1| hypothetical protein W7U_19320 [Mycobacterium sp. H4Y]
M. shigaense_orf00913	646271	647761	+	496	128	0	0	0	COG2234	NA	R	peptidase, M28 family protein [Mycobacterium avium 104] gi|118164366|gb|ABK65263.1| peptidase, M28 family protein [Mycobacterium avium 104]
M. shigaense_orf00914	647758	649227	+	489	63	0	1	0	COG2234	NA	R	peptidase, M28 family protein [Mycobacterium intracellulare ATCC 13950] gi|379749340|ref|YP_005340161.1| peptidase, M28 family protein [Mycobacterium intracellulare ATCC 13950] gi|378801704|gb|AFC45840.1| peptidase, M28 family protein [Mycobacterium ...
M. shigaense_orf00917	649345	650805	+	486	76	0	0	0	COG2321	NA	R	LpqM [Mycobacterium avium subsp. avium ATCC 25291]
M. shigaense_orf00918	650884	651330	+	148	197	0	0	0	NA	NA	NA	hypothetical protein MycrhDRAFT_5294 [Mycobacterium rhodesiae JS60] gi|353184380|gb|EHB49907.1| hypothetical protein MycrhDRAFT_5294 [Mycobacterium rhodesiae JS60]
M. shigaense_orf00919	652202	651342	-	286	84	0	0	0	COG2141	NA	C	hypothetical protein MCOL_V201320 [Mycobacterium colombiense CECT 3035] gi|400333333|gb|EJO90827.1| hypothetical protein MCOL_V201320 [Mycobacterium colombiense CECT 3035]
M. shigaense_orf00921	652667	652233	-	144	63	0	0	0	COG1846	NA	K	MarR family transcriptional regulator [Mycobacterium colombiense CECT 3035] gi|400333332|gb|EJO90826.1| MarR family transcriptional regulator [Mycobacterium colombiense CECT 3035]
M. shigaense_orf00922	653309	652746	-	187	60	0	0	0	COG3571	NA	R	hypothetical protein MCOL_V201310 [Mycobacterium colombiense CECT 3035] gi|400333331|gb|EJO90825.1| hypothetical protein MCOL_V201310 [Mycobacterium colombiense CECT 3035]
M. shigaense_orf00923	654199	653372	-	275	117	0	0	1	COG0351	NA	H	bifunctional hydroxy-methylpyrimidine kinase/ hydroxy-phosphomethylpyrimidine kinase [Mycobacterium colombiense CECT 3035] gi|400333330|gb|EJO90824.1| bifunctional hydroxy-methylpyrimidine kinase/ hydroxy-phosphomethylpyrimidine kinase [Mycobacterium ...
M. shigaense_orf00925	655856	654210	-	548	135	0	0	0	COG0422	NA	H	thiamine biosynthesis protein ThiC [Mycobacterium avium subsp. paratuberculosis K-10] gi|47606074|sp|P61426.1|THIC_MYCPA RecName: Full=Phosphomethylpyrimidine synthase; AltName: Full=Hydroxymethylpyrimidine phosphate synthase; Short=HMP-P synthase; S ...
M. shigaense_orf00926	656302	656024	-	92	178	0	0	0	NA	NOG42163	NA	hypothetical protein MintA_03461 [Mycobacterium intracellulare ATCC 13950] gi|379749323|ref|YP_005340144.1| hypothetical protein OCU_46040 [Mycobacterium intracellulare ATCC 13950] gi|379756644|ref|YP_005345316.1| hypothetical protein OCO_46320 [Myco ...
M. shigaense_orf00927	656362	656628	+	88	275	1	0	0	NA	NA	NA	hypothetical protein MCOL_V201275 [Mycobacterium colombiense CECT 3035] gi|400333324|gb|EJO90818.1| hypothetical protein MCOL_V201275 [Mycobacterium colombiense CECT 3035]
M. shigaense_orf00928	657094	656663	-	143	526	0	0	0	NA	NOG12702	NA	hypothetical protein MIP_07013 [Mycobacterium indicus pranii MTCC 9506] gi|405131462|gb|AFS16717.1| Hypothetical protein MIP_07013 [Mycobacterium indicus pranii MTCC 9506]
M. shigaense_orf00929	658077	657283	-	264	71	0	0	0	COG0708	NA	L	exodeoxyribonuclease III protein XthA [Mycobacterium tuberculosis 94_M4241A] gi|298493697|gb|EFI28991.1| exodeoxyribonuclease III protein XthA [Mycobacterium tuberculosis 94_M4241A]
M. shigaense_orf00930	658823	658170	-	217	41	0	0	0	NA	NA	NA	hypothetical protein MIP_07009 [Mycobacterium indicus pranii MTCC 9506] gi|405131460|gb|AFS16715.1| Hypothetical protein MIP_07009 [Mycobacterium indicus pranii MTCC 9506]
M. shigaense_orf00931	659488	658934	-	184	96	0	0	1	COG0242	NA	J	peptide deformylase [Mycobacterium colombiense CECT 3035] gi|400333320|gb|EJO90814.1| peptide deformylase [Mycobacterium colombiense CECT 3035]
M. shigaense_orf00932	659753	660061	+	102	271	0	0	1	NA	NOG08694	NA	hypothetical protein MCOL_V201250 [Mycobacterium colombiense CECT 3035] gi|400333319|gb|EJO90813.1| hypothetical protein MCOL_V201250 [Mycobacterium colombiense CECT 3035]
M. shigaense_orf00934	660126	660563	+	145	201	0	0	0	NA	NOG12073;NOG236487;NOG221565	S,R,O	hypothetical protein MAV_4723 [Mycobacterium avium 104] gi|254777162|ref|ZP_05218678.1| hypothetical protein MaviaA2_21184 [Mycobacterium avium subsp. avium ATCC 25291] gi|118164524|gb|ABK65421.1| conserved hypothetical protein [Mycobacterium avium 1 ...
M. shigaense_orf00935	660596	661327	+	243	145	0	0	0	COG2032	NA	P	copper/zinc superoxide dismutase [Mycobacterium parascrofulaceum ATCC BAA-614] gi|295896933|gb|EFG76559.1| copper/zinc superoxide dismutase [Mycobacterium parascrofulaceum ATCC BAA-614]
M. shigaense_orf00936	661308	662447	+	379	113	0	0	0	COG2170	NA	S	carboxylate-amine ligase [Mycobacterium parascrofulaceum ATCC BAA-614] gi|295896934|gb|EFG76560.1| carboxylate-amine ligase [Mycobacterium parascrofulaceum ATCC BAA-614]
M. shigaense_orf00937	662447	663091	+	214	97	0	1	0	COG2802	NA	R	hypothetical protein MintA_03411 [Mycobacterium intracellulare ATCC 13950] gi|379749313|ref|YP_005340134.1| hypothetical protein OCU_45940 [Mycobacterium intracellulare ATCC 13950] gi|379756634|ref|YP_005345306.1| hypothetical protein OCO_46220 [Myco ...
M. shigaense_orf00938	663108	664130	+	340	67	0	1	0	COG2141	NA	C	hypothetical protein MaviaA2_21164 [Mycobacterium avium subsp. avium ATCC 25291]
M. shigaense_orf00939	664127	664945	+	272	49	0	1	0	COG1024	NA	I	echA8_2 [Mycobacterium sp. MOTT36Y] gi|443307799|ref|ZP_21037586.1| echA8_2 [Mycobacterium sp. H4Y] gi|386791473|gb|AFJ37592.1| echA8_2 [Mycobacterium sp. MOTT36Y] gi|442765167|gb|ELR83165.1| echA8_2 [Mycobacterium sp. H4Y]
M. shigaense_orf00940	665875	664958	-	305	51	0	0	0	COG1028	NA	I,Q,R	short-chain dehydrogenase/reductase SDR [Mycobacterium colombiense CECT 3035] gi|400333311|gb|EJO90805.1| short-chain dehydrogenase/reductase SDR [Mycobacterium colombiense CECT 3035]
M. shigaense_orf00941	667221	665872	-	449	66	0	0	0	COG0477	NA	P,R,E,G	transmembrane efflux pump [Mycobacterium intracellulare MOTT-64] gi|406031377|ref|YP_006730268.1| methylenomycin A resistance protein [Mycobacterium indicus pranii MTCC 9506] gi|378810619|gb|AFC54753.1| transmembrane efflux pump [Mycobacterium intrac ...
M. shigaense_orf00942	669633	667468	-	721	64	0	0	0	COG0464	NA	O	cell division protein 48 [Mycobacterium intracellulare ATCC 13950] gi|379756627|ref|YP_005345299.1| cell division protein 48 [Mycobacterium intracellulare MOTT-02] gi|378801670|gb|AFC45806.1| cell division protein 48 [Mycobacterium intracellulare ATC ...
M. shigaense_orf00943	670502	669630	-	290	69	0	0	0	COG1183	NA	I	CDP-diacylglycerol--serine O-phosphatidyltransferase [Mycobacterium intracellulare ATCC 13950] gi|379749305|ref|YP_005340126.1| CDP-diacylglycerol--serine O-phosphatidyltransferase [Mycobacterium intracellulare ATCC 13950] gi|379756626|ref|YP_0053452 ...
M. shigaense_orf00944	671251	670529	-	240	49	0	0	0	COG0688	NA	I	phosphatidylserine decarboxylase [Mycobacterium marinum M] gi|226723187|sp|B2HQP4.1|PSD_MYCMM RecName: Full=Phosphatidylserine decarboxylase proenzyme; Contains: RecName: Full=Phosphatidylserine decarboxylase alpha chain; Contains: RecName: Full=Phos ...
M. shigaense_orf00945	672475	671276	-	399	115	0	0	0	COG0303	NA	H	molybdopterin biosynthesis protein MoeA [Mycobacterium intracellulare ATCC 13950] gi|378801666|gb|AFC45802.1| molybdopterin biosynthesis protein MoeA [Mycobacterium intracellulare ATCC 13950]
M. shigaense_orf00946	672593	672859	+	88	172	0	0	0	NA	NA	NA	conserved hypothetical protein [Mycobacterium parascrofulaceum ATCC BAA-614] gi|295896914|gb|EFG76541.1| conserved hypothetical protein [Mycobacterium parascrofulaceum ATCC BAA-614]
M. shigaense_orf00948	672868	673191	+	107	229	0	0	0	NA	NOG256998	NA	TetR family transcriptional regulator [Mycobacterium intracellulare ATCC 13950] gi|379749299|ref|YP_005340120.1| TetR family transcriptional regulator [Mycobacterium intracellulare ATCC 13950] gi|379756620|ref|YP_005345292.1| TetR family transcriptio ...
M. shigaense_orf00949	673670	673179	-	163	173	0	0	0	NA	NOG118778;NOG219751	S,R	hypothetical protein MintA_07574 [Mycobacterium intracellulare ATCC 13950] gi|379749298|ref|YP_005340119.1| hypothetical protein OCU_45790 [Mycobacterium intracellulare ATCC 13950] gi|379756619|ref|YP_005345291.1| hypothetical protein OCO_46070 [Myco ...
M. shigaense_orf00950	673726	674319	+	197	140	0	1	0	COG0006	NOG73811	R,E	hypothetical protein W7S_23140 [Mycobacterium sp. MOTT36Y] gi|443307784|ref|ZP_21037571.1| hypothetical protein W7U_19095 [Mycobacterium sp. H4Y] gi|386791458|gb|AFJ37577.1| hypothetical protein W7S_23140 [Mycobacterium sp. MOTT36Y] gi|442765152|gb|E ...
M. shigaense_orf00951	675314	674400	-	304	118	0	0	0	COG1028	NA	I,Q,R	short chain dehydrogenase [Mycobacterium colombiense CECT 3035] gi|400333297|gb|EJO90791.1| short chain dehydrogenase [Mycobacterium colombiense CECT 3035]
M. shigaense_orf00953	675418	675984	+	188	73	0	0	0	COG1309	NA	K	TetR/AcrR family transcriptional regulator [Mycobacterium leprae TN] gi|221229559|ref|YP_002502975.1| TetR family transcriptional regulator [Mycobacterium leprae Br4923] gi|13092629|emb|CAC29824.1| putative TetR/AcrR-family transcriptional regulator ...
M. shigaense_orf00954	676183	677808	+	541	1309	0	0	1	COG0459	NA	O	heat shock protein 65 [Mycobacterium marinum] gi|24571123|gb|AAN62889.1|AF456474_1 heat shock protein 65 [Mycobacterium marinum]
M. shigaense_orf00957	678143	678355	+	70	73	1	0	0	NA	NA	NA	hypothetical protein Mycsm_02346 [Mycobacterium smegmatis JS623] gi|433296868|gb|AGB22688.1| hypothetical protein Mycsm_02346 [Mycobacterium smegmatis JS623]
M. shigaense_orf00958	678839	678462	-	125	131	0	1	0	NA	NOG46531	NA	hypothetical protein MCOL_V201120 [Mycobacterium colombiense CECT 3035] gi|400333293|gb|EJO90787.1| hypothetical protein MCOL_V201120 [Mycobacterium colombiense CECT 3035]
M. shigaense_orf00959	679730	678903	-	275	126	0	0	0	COG5651	NA	N	hypothetical protein MAP3939c [Mycobacterium avium subsp. paratuberculosis K-10] gi|118462388|ref|YP_883831.1| PPE family protein [Mycobacterium avium 104] gi|417748092|ref|ZP_12396541.1| PPE family protein [Mycobacterium avium subsp. paratuberculosi ...
M. shigaense_orf00960	681508	679769	-	579	116	0	0	0	COG3653	NA	Q	amidohydrolase [Mycobacterium avium 104] gi|254777141|ref|ZP_05218657.1| amidohydrolase family protein [Mycobacterium avium subsp. avium ATCC 25291] gi|118164216|gb|ABK65113.1| amidohydrolase family protein [Mycobacterium avium 104]
M. shigaense_orf00961	681605	682120	+	171	184	0	0	0	NA	NOG12504	S	hypothetical protein MCOL_V201100 [Mycobacterium colombiense CECT 3035] gi|400333289|gb|EJO90783.1| hypothetical protein MCOL_V201100 [Mycobacterium colombiense CECT 3035]
M. shigaense_orf00963	682131	683003	+	290	89	0	0	0	NA	NOG270307	NA	hypothetical protein W7S_23095 [Mycobacterium sp. MOTT36Y] gi|386791449|gb|AFJ37568.1| hypothetical protein W7S_23095 [Mycobacterium sp. MOTT36Y]
M. shigaense_orf00964	683041	684084	+	347	77	1	0	0	NA	NA	NA	bifunctional P-450/NADPH-P450 reductase [Mycobacterium parascrofulaceum ATCC BAA-614] gi|295900410|gb|EFG79824.1| bifunctional P-450/NADPH-P450 reductase [Mycobacterium parascrofulaceum ATCC BAA-614]
M. shigaense_orf00965	684081	684404	+	107	73	0	0	0	NA	NA	NA	cytochrome P450 [Streptomyces sp. AA4] gi|302438266|gb|EFL10082.1| cytochrome P450 [Streptomyces sp. AA4]
M. shigaense_orf00966	685123	684419	-	234	56	0	0	0	NA	NOG16684	S	hypothetical protein MUL_1399 [Mycobacterium ulcerans Agy99] gi|183980789|ref|YP_001849080.1| hypothetical protein MMAR_0765 [Mycobacterium marinum M] gi|443489190|ref|YP_007367337.1| conserved membrane protein [Mycobacterium liflandii 128FXT] gi|166 ...
M. shigaense_orf00969	685698	685120	-	192	59	0	0	0	COG1595	NA	K	RNA polymerase sigma factor SigK [Mycobacterium parascrofulaceum ATCC BAA-614] gi|295898472|gb|EFG78035.1| RNA polymerase sigma factor SigK [Mycobacterium parascrofulaceum ATCC BAA-614]
M. shigaense_orf00971	687486	685756	-	576	66	0	1	0	COG0526;COG0785	NA	C,O	hypothetical protein OCQ_47020 [Mycobacterium intracellulare MOTT-64] gi|443307774|ref|ZP_21037561.1| hypothetical protein W7U_19045 [Mycobacterium sp. H4Y] gi|378812080|gb|AFC56214.1| hypothetical protein OCQ_47020 [Mycobacterium intracellulare MOTT ...
M. shigaense_orf00974	690356	687531	-	941	69	0	0	0	COG2409	NA	R	Conserved membrane protein of unknown function, MmpL4 [Mycobacterium canettii CIPT 140070010] gi|432161127|emb|CCK58462.1| Conserved membrane protein of unknown function, MmpL4 [Mycobacterium canettii CIPT 140070010]
M. shigaense_orf00975	690711	691379	+	222	55	0	0	0	NA	NOG245394	L	hypothetical protein MAP3945 [Mycobacterium avium subsp. paratuberculosis K-10] gi|41398876|gb|AAS06495.1| hypothetical protein MAP_3945 [Mycobacterium avium subsp. paratuberculosis K-10]
M. shigaense_orf00976	691466	691894	+	142	75	0	0	0	NA	NOG48119	NA	hypothetical protein MMAR_0774 [Mycobacterium marinum M] gi|443489199|ref|YP_007367346.1| conserved membrane protein [Mycobacterium liflandii 128FXT] gi|183174124|gb|ACC39234.1| conserved membrane protein [Mycobacterium marinum M] gi|442581696|gb|AGC ...
M. shigaense_orf00979	691891	694875	+	994	75	0	0	0	COG2409	NA	R	MmpL family membrane protein [Mycobacterium parascrofulaceum ATCC BAA-614] gi|295900274|gb|EFG79703.1| MmpL family membrane protein [Mycobacterium parascrofulaceum ATCC BAA-614]
M. shigaense_orf00980	695148	694882	-	88	572	0	0	0	NA	NA	NA	NA
M. shigaense_orf00981	695719	695267	-	150	1194	0	0	0	NA	NOG12033	NA	Protein of unknown function (DUF2782) [Mycobacterium avium subsp. paratuberculosis S397] gi|336460310|gb|EGO39210.1| Protein of unknown function (DUF2782) [Mycobacterium avium subsp. paratuberculosis S397]
M. shigaense_orf00983	697007	696696	-	103	119	0	0	0	NA	NA	NA	hypothetical protein OCO_45880 [Mycobacterium intracellulare MOTT-02] gi|379764130|ref|YP_005350527.1| hypothetical protein OCQ_46940 [Mycobacterium intracellulare MOTT-64] gi|387877982|ref|YP_006308286.1| hypothetical protein W7S_23050 [Mycobacteriu ...
M. shigaense_orf00984	696699	695785	-	304	106	0	0	0	COG1024	NA	I	enoyl-CoA hydratase ECHA2 [Mycobacterium canettii CIPT 140010059] gi|433625547|ref|YP_007259176.1| Enoyl-CoA hydratase EchA2 (enoyl hydrase) (unsaturated acyl-CoA hydratase) (crotonase) [Mycobacterium canettii CIPT 140060008] gi|433640575|ref|YP_0072 ...
M. shigaense_orf00985	699065	697035	-	676	69	0	0	0	COG1505	NA	E	hypothetical protein OCO_45870 [Mycobacterium intracellulare MOTT-02] gi|378806815|gb|AFC50950.1| hypothetical protein OCO_45870 [Mycobacterium intracellulare MOTT-02]
M. shigaense_orf00986	699143	700666	+	507	212	0	0	0	COG1012	NA	C	aldehyde dehydrogenase [Mycobacterium parascrofulaceum ATCC BAA-614] gi|295896867|gb|EFG76495.1| aldehyde dehydrogenase [Mycobacterium parascrofulaceum ATCC BAA-614]
M. shigaense_orf00987	700666	701214	+	182	209	0	0	0	COG3564	NA	S	hypothetical protein MMAR_0781 [Mycobacterium marinum M] gi|443489213|ref|YP_007367360.1| hypothetical protein MULP_00800 [Mycobacterium liflandii 128FXT] gi|183174131|gb|ACC39241.1| conserved hypothetical protein [Mycobacterium marinum M] gi|4425817 ...
M. shigaense_orf00988	701225	701503	+	92	182	0	0	0	NA	NOG47585	NA	hypothetical protein MT0476 [Mycobacterium tuberculosis CDC1551] gi|148821658|ref|YP_001286412.1| hypothetical protein TBFG_10467 [Mycobacterium tuberculosis F11] gi|167970720|ref|ZP_02552997.1| conserved hydrophobic protein [Mycobacterium tuberculos ...
M. shigaense_orf00990	701496	702044	+	182	120	0	0	0	NA	NA	NA	hypothetical protein MCOL_V201035 [Mycobacterium colombiense CECT 3035] gi|400333276|gb|EJO90770.1| hypothetical protein MCOL_V201035 [Mycobacterium colombiense CECT 3035]
M. shigaense_orf00992	702062	703459	+	465	149	0	0	1	COG1249	NA	C	dihydrolipoamide dehydrogenase [Mycobacterium colombiense CECT 3035] gi|400333275|gb|EJO90769.1| dihydrolipoamide dehydrogenase [Mycobacterium colombiense CECT 3035]
M. shigaense_orf00993	703463	703738	+	91	108	0	0	0	NA	NA	NA	hypothetical protein MCOL_V201025 [Mycobacterium colombiense CECT 3035] gi|400333274|gb|EJO90768.1| hypothetical protein MCOL_V201025 [Mycobacterium colombiense CECT 3035]
M. shigaense_orf00994	704310	703735	-	191	93	0	0	0	COG2128	NA	S	hypothetical protein MUL_4533 [Mycobacterium ulcerans Agy99] gi|118571738|gb|ABL06489.1| conserved protein [Mycobacterium ulcerans Agy99]
M. shigaense_orf00997	705647	704307	-	446	122	0	0	0	COG3800;COG1396	NA	K,R	DNA-binding protein [Mycobacterium parascrofulaceum ATCC BAA-614] gi|295896874|gb|EFG76502.1| DNA-binding protein [Mycobacterium parascrofulaceum ATCC BAA-614]
M. shigaense_orf00999	705881	706687	+	268	143	0	0	0	COG3884	NA	I	acyl-ACP thioesterase [Mycobacterium parascrofulaceum ATCC BAA-614] gi|295896875|gb|EFG76503.1| acyl-ACP thioesterase [Mycobacterium parascrofulaceum ATCC BAA-614]
M. shigaense_orf01000	706960	708246	+	428	588	0	0	0	COG2224	NA	C	isocitrate lyase [Mycobacterium rhodesiae NBB3] gi|359818986|gb|AEV71799.1| isocitrate lyase [Mycobacterium rhodesiae NBB3]
M. shigaense_orf01001	708462	709277	+	271	105	0	0	1	COG1250	NA	I	3-hydroxybutyryl-CoA dehydrogenase [Mycobacterium colombiense CECT 3035] gi|400333269|gb|EJO90763.1| 3-hydroxybutyryl-CoA dehydrogenase [Mycobacterium colombiense CECT 3035]
M. shigaense_orf01002	709353	710213	+	286	332	0	0	0	COG2230	NA	M	mycolic acid synthase UmaA [Mycobacterium marinum M] gi|183174144|gb|ACC39254.1| mycolic acid synthase UmaA [Mycobacterium marinum M]
M. shigaense_orf01004	711096	710233	-	287	222	0	0	0	COG2230	NA	M	cyclopropane-fatty-acyl-phospholipid synthase 1 [Mycobacterium parascrofulaceum ATCC BAA-614] gi|295896880|gb|EFG76508.1| cyclopropane-fatty-acyl-phospholipid synthase 1 [Mycobacterium parascrofulaceum ATCC BAA-614]
M. shigaense_orf01005	711988	711287	-	233	190	0	0	1	COG1309	NA	K	TetR family transcriptional regulator [Mycobacterium tuberculosis CDC1551] gi|13879996|gb|AAK44712.1| transcriptional regulator, TetR family [Mycobacterium tuberculosis CDC1551]
M. shigaense_orf01006	712123	713475	+	450	165	0	0	0	COG2733	NA	S	hypothetical protein MCOL_V200980 [Mycobacterium colombiense CECT 3035] gi|400333265|gb|EJO90759.1| hypothetical protein MCOL_V200980 [Mycobacterium colombiense CECT 3035]
M. shigaense_orf01008	713570	714001	+	143	198	0	0	0	COG1396	NA	K	PbsX family transcriptional regulator [Mycobacterium parascrofulaceum ATCC BAA-614] gi|295896883|gb|EFG76511.1| PbsX family transcriptional regulator [Mycobacterium parascrofulaceum ATCC BAA-614]
M. shigaense_orf01009	714302	714904	+	200	272	0	0	0	NA	NOG11132	S	iron-regulated heparin binding hemagglutinin hbhA, partial [Mycobacterium tuberculosis '98-R604 INH-RIF-EM']
M. shigaense_orf01010	714990	715265	+	91	366	0	0	0	NA	NOG09962	NA	conserved transmembrane protein [Mycobacterium liflandii 128FXT] gi|442581724|gb|AGC60867.1| conserved transmembrane protein [Mycobacterium liflandii 128FXT]
M. shigaense_orf01012	715270	715689	+	139	160	0	0	0	NA	NOG12987	S	hypothetical protein MCOL_V200960 [Mycobacterium colombiense CECT 3035] gi|400333261|gb|EJO90755.1| hypothetical protein MCOL_V200960 [Mycobacterium colombiense CECT 3035]
M. shigaense_orf01014	715689	716366	+	225	122	0	0	1	COG0274	NA	F	deoxyribose-phosphate aldolase [Mycobacterium ulcerans Agy99] gi|183980827|ref|YP_001849118.1| deoxyribose-phosphate aldolase [Mycobacterium marinum M] gi|229487695|sp|A0PVY3.1|DEOC_MYCUA RecName: Full=Deoxyribose-phosphate aldolase; Short=DERA; AltN ...
M. shigaense_orf01015	717408	716377	-	343	126	0	0	0	NA	NOG85915	NA	hypothetical protein MAP3972c [Mycobacterium avium subsp. paratuberculosis K-10] gi|41398903|gb|AAS06522.1| hypothetical protein MAP_3972c [Mycobacterium avium subsp. paratuberculosis K-10]
M. shigaense_orf01016	718259	717405	-	284	137	0	0	0	COG0388	NA	R	carbon-nitrogen hydrolase [Mycobacterium parascrofulaceum ATCC BAA-614] gi|295896889|gb|EFG76517.1| carbon-nitrogen hydrolase [Mycobacterium parascrofulaceum ATCC BAA-614]
M. shigaense_orf01019	718866	718354	-	170	87	0	0	0	NA	NOG124932;NOG43954	S	hypothetical protein MUL_4551 [Mycobacterium ulcerans Agy99] gi|183980831|ref|YP_001849122.1| hypothetical protein MMAR_0807 [Mycobacterium marinum M] gi|118571754|gb|ABL06505.1| conserved hypothetical protein [Mycobacterium ulcerans Agy99] gi|183174 ...
M. shigaense_orf01020	718893	719993	+	366	68	0	0	0	COG0812	NA	M	UDP-N-acetylmuramate dehydrogenase [Mycobacterium parascrofulaceum ATCC BAA-614] gi|295896891|gb|EFG76519.1| UDP-N-acetylmuramate dehydrogenase [Mycobacterium parascrofulaceum ATCC BAA-614]
M. shigaense_orf01021	720067	721416	+	449	262	0	0	0	COG1376	NA	S	ErfK/YbiS/YcfS/YnhG family protein [Mycobacterium parascrofulaceum ATCC BAA-614] gi|295896892|gb|EFG76520.1| ErfK/YbiS/YcfS/YnhG family protein [Mycobacterium parascrofulaceum ATCC BAA-614]
M. shigaense_orf01022	722149	721400	-	249	205	0	0	0	COG4221	NA	R	hypothetical protein MAP3977c [Mycobacterium avium subsp. paratuberculosis K-10] gi|254777103|ref|ZP_05218619.1| hypothetical protein MaviaA2_20889 [Mycobacterium avium subsp. avium ATCC 25291] gi|440779440|ref|ZP_20958161.1| hypothetical protein D52 ...
M. shigaense_orf01023	722348	722190	-	52	223	1	0	0	NA	NA	NA	NA
M. shigaense_orf01024	722319	723632	+	437	190	0	0	0	COG1940	NA	K,G	ROK family protein [Mycobacterium avium subsp. avium ATCC 25291]
M. shigaense_orf01026	723691	725025	+	444	176	0	0	1	COG0438	NA	M	mannosyltransferase [Mycobacterium liflandii 128FXT] gi|442581737|gb|AGC60880.1| mannosyltransferase [Mycobacterium liflandii 128FXT]
M. shigaense_orf01027	725078	725584	+	168	134	0	0	1	NA	NOG07234	NA	hypothetical protein MXEN_04838 [Mycobacterium xenopi RIVM700367] gi|383338045|gb|EID16418.1| hypothetical protein MXEN_04838 [Mycobacterium xenopi RIVM700367]
M. shigaense_orf01029	725682	726431	+	249	157	0	0	1	COG0588	NA	G	phosphoglyceromutase [Mycobacterium avium subsp. avium ATCC 25291] gi|417748042|ref|ZP_12396494.1| phosphoglycerate mutase, BPG-dependent, family 1 [Mycobacterium avium subsp. paratuberculosis S397] gi|336460430|gb|EGO39327.1| phosphoglycerate mutase ...
M. shigaense_orf01031	726606	727835	+	409	144	0	0	1	COG0642	NA	T	SenX3 [Mycobacterium avium subsp. paratuberculosis K-10] gi|41398913|gb|AAS06532.1| SenX3 [Mycobacterium avium subsp. paratuberculosis K-10]
M. shigaense_orf01032	727885	728568	+	227	124	0	0	1	COG0745	NA	K,T	RegX3 [Mycobacterium avium subsp. paratuberculosis K-10] gi|118466224|ref|YP_883789.1| DNA-binding response regulator [Mycobacterium avium 104] gi|254777097|ref|ZP_05218613.1| DNA-binding response regulator [Mycobacterium avium subsp. avium ATCC 2529 ...
M. shigaense_orf01033	728909	729583	+	224	69	0	0	0	COG5651	NA	N	PPE family protein [Mycobacterium parascrofulaceum ATCC BAA-614] gi|295896656|gb|EFG76295.1| PPE family protein [Mycobacterium parascrofulaceum ATCC BAA-614]
M. shigaense_orf01034	729726	730181	+	151	58	1	0	0	NA	NA	NA	PPE family protein [Mycobacterium parascrofulaceum ATCC BAA-614] gi|295896906|gb|EFG76534.1| PPE family protein [Mycobacterium parascrofulaceum ATCC BAA-614]
M. shigaense_orf01035	731154	730240	-	304	49	0	0	0	NA	NOG39529	S	hypothetical protein J112_02630 [Mycobacterium tuberculosis str. Beijing/NITR203] gi|478740339|gb|AGJ66499.1| hypothetical protein J112_02630 [Mycobacterium tuberculosis str. Beijing/NITR203]
M. shigaense_orf01036	731650	731165	-	161	50	0	0	0	COG0494	NA	R,L	hypothetical protein MAP3984c [Mycobacterium avium subsp. paratuberculosis K-10] gi|417748037|ref|ZP_12396490.1| ADP-ribose pyrophosphatase [Mycobacterium avium subsp. paratuberculosis S397] gi|440779450|ref|ZP_20958169.1| hypothetical protein D522_2 ...
M. shigaense_orf01039	732412	731666	-	248	111	0	0	1	NA	NOG05461	NA	hypothetical protein MCOL_V200870 [Mycobacterium colombiense CECT 3035] gi|400333243|gb|EJO90737.1| hypothetical protein MCOL_V200870 [Mycobacterium colombiense CECT 3035]
M. shigaense_orf01042	732579	733595	+	338	138	0	0	1	COG0248	NA	P,F	Ppx/GppA phosphatase [Mycobacterium colombiense CECT 3035] gi|400333242|gb|EJO90736.1| Ppx/GppA phosphatase [Mycobacterium colombiense CECT 3035]
M. shigaense_orf01045	733592	734641	+	349	153	0	0	0	NA	NOG08633	S	hypothetical protein MaviaA2_20834 [Mycobacterium avium subsp. avium ATCC 25291]
M. shigaense_orf01046	734657	735499	+	280	100	0	0	1	COG1082	NA	G	hypothetical protein MCOL_V200855 [Mycobacterium colombiense CECT 3035] gi|400333240|gb|EJO90734.1| hypothetical protein MCOL_V200855 [Mycobacterium colombiense CECT 3035]
M. shigaense_orf01047	735525	736349	+	274	65	0	0	0	NA	NOG44548	NA	hypothetical protein MCOL_V200850 [Mycobacterium colombiense CECT 3035] gi|400333239|gb|EJO90733.1| hypothetical protein MCOL_V200850 [Mycobacterium colombiense CECT 3035]
M. shigaense_orf01049	736397	737272	+	291	65	0	0	0	COG0345	NA	E	pyrroline-5-carboxylate reductase ProC [Mycobacterium liflandii 128FXT] gi|442581751|gb|AGC60894.1| pyrroline-5-carboxylate reductase ProC [Mycobacterium liflandii 128FXT]
M. shigaense_orf01050	737533	737670	+	45	433	0	0	1	NA	NOG07380	L	hypothetical protein MT0521 [Mycobacterium tuberculosis CDC1551] gi|31791682|ref|NP_854175.1| hypothetical protein Mb0512 [Mycobacterium bovis AF2122/97] gi|57116743|ref|YP_177624.1| Conserved protein [Mycobacterium tuberculosis H37Rv] gi|121636418|r ...
M. shigaense_orf01051	738025	739140	+	371	121	0	0	1	COG0451	NA	M,G	UDP-glucose 4-epimerase GalE [Mycobacterium parascrofulaceum ATCC BAA-614] gi|295896835|gb|EFG76464.1| UDP-glucose 4-epimerase GalE [Mycobacterium parascrofulaceum ATCC BAA-614]
M. shigaense_orf01052	739146	740213	+	355	195	0	0	0	COG0204	NA	I	acyltransferase [Mycobacterium avium 104] gi|118165104|gb|ABK66001.1| acyltransferase [Mycobacterium avium 104]
M. shigaense_orf01053	741222	740293	-	309	279	0	0	0	COG2230	NA	M	cyclopropane-fatty-acyl-phospholipid synthase 2 [Mycobacterium parascrofulaceum ATCC BAA-614] gi|295896837|gb|EFG76466.1| cyclopropane-fatty-acyl-phospholipid synthase 2 [Mycobacterium parascrofulaceum ATCC BAA-614]
M. shigaense_orf01054	741747	741232	-	171	131	0	0	0	NA	NOG08314	S	hypothetical protein MCOL_V200820 [Mycobacterium colombiense CECT 3035] gi|400333233|gb|EJO90727.1| hypothetical protein MCOL_V200820 [Mycobacterium colombiense CECT 3035]
M. shigaense_orf01055	742709	741789	-	306	84	0	0	1	COG0560	NA	E	HAD-superfamily protein subfamily protein IB hydrolase [Mycobacterium intracellulare ATCC 13950] gi|379749231|ref|YP_005340052.1| HAD-superfamily hydrolase [Mycobacterium intracellulare ATCC 13950] gi|379756552|ref|YP_005345224.1| HAD-superfamily hyd ...
M. shigaense_orf01056	743036	742830	-	68	86	1	0	0	NA	NA	NA	hypothetical protein MAPs_40500 [Mycobacterium avium subsp. paratuberculosis S397] gi|336460447|gb|EGO39343.1| hypothetical protein MAPs_40500 [Mycobacterium avium subsp. paratuberculosis S397]
M. shigaense_orf01058	745978	744671	-	435	62	0	0	0	NA	NA	NA	hypothetical protein D522_22808, partial [Mycobacterium avium subsp. paratuberculosis S5] gi|436720015|gb|ELP44331.1| hypothetical protein D522_22808, partial [Mycobacterium avium subsp. paratuberculosis S5]
M. shigaense_orf01060	746273	745983	-	96	53	0	0	0	NA	NOG46405	NA	ESAT-6-like protein 12 [Mycobacterium indicus pranii MTCC 9506] gi|405131370|gb|AFS16625.1| Putative ESAT-6-like protein 12 [Mycobacterium indicus pranii MTCC 9506]
M. shigaense_orf01061	746577	746266	-	103	60	0	0	0	NA	NOG287756	NA	Putative ESAT-6 like protein EsxF (hypothetical alanine and glycine rich protein) (ESAT-6 like protein 13) [Mycobacterium tuberculosis H37Rv] gi|15843537|ref|NP_338574.1| hypothetical protein MT4024 [Mycobacterium tuberculosis CDC1551] gi|148663772|r ...
M. shigaense_orf01063	746648	746905	+	85	105	0	0	0	COG0526	NA	C,O	hypothetical protein MintA_14082 [Mycobacterium intracellulare ATCC 13950]
M. shigaense_orf01065	747030	748430	+	466	305	0	0	1	COG0373	NA	H	glutamyl-tRNA reductase [Mycobacterium marinum M] gi|183174193|gb|ACC39303.1| glutamyl-tRNA reductase HemA [Mycobacterium marinum M]
M. shigaense_orf01067	748435	749391	+	318	192	0	0	1	COG0181	NA	H	porphobilinogen deaminase [Mycobacterium avium 104] gi|158512461|sp|A0QLI0.1|HEM3_MYCA1 RecName: Full=Porphobilinogen deaminase; Short=PBG; AltName: Full=Hydroxymethylbilane synthase; Short=HMBS; AltName: Full=Pre-uroporphyrinogen synthase gi|1181683 ...
M. shigaense_orf01068	749469	751097	+	542	193	0	0	1	COG1587;COG0007	NA	H	uroporphyrin-III C-methyltransferase [Mycobacterium colombiense CECT 3035] gi|400333225|gb|EJO90719.1| uroporphyrin-III C-methyltransferase [Mycobacterium colombiense CECT 3035]
M. shigaense_orf01070	751216	752103	+	295	192	0	0	1	COG0113	NA	H	porphobilinogen synthase [Mycobacterium parascrofulaceum ATCC BAA-614] gi|295896849|gb|EFG76478.1| porphobilinogen synthase [Mycobacterium parascrofulaceum ATCC BAA-614]
M. shigaense_orf01071	752145	752696	+	183	307	0	0	0	NA	NOG45615	NA	hypothetical protein MAP4006 [Mycobacterium avium subsp. paratuberculosis K-10] gi|41398937|gb|AAS06556.1| hypothetical protein MAP_4006 [Mycobacterium avium subsp. paratuberculosis K-10]
M. shigaense_orf01072	752693	752962	+	89	1844	0	0	0	NA	NOG81273	NA	transmembrane protein [Mycobacterium colombiense CECT 3035] gi|400333222|gb|EJO90716.1| transmembrane protein [Mycobacterium colombiense CECT 3035]
M. shigaense_orf01073	753383	752943	-	146	2932	0	0	0	COG1366	NA	T	hypothetical protein MUL_0605 [Mycobacterium ulcerans Agy99] gi|183980875|ref|YP_001849166.1| hypothetical protein MMAR_0853 [Mycobacterium marinum M] gi|443489276|ref|YP_007367423.1| putative regulatory protein [Mycobacterium liflandii 128FXT] gi|11 ...
M. shigaense_orf01074	753711	754967	+	418	107	0	0	0	COG1835	NA	I	acyltransferase [Mycobacterium parascrofulaceum ATCC BAA-614] gi|295896853|gb|EFG76482.1| acyltransferase [Mycobacterium parascrofulaceum ATCC BAA-614]
M. shigaense_orf01075	755114	755809	+	231	160	0	0	0	NA	NOG44102	R	Conserved protein of unknown function, possibly exported [Mycobacterium canettii CIPT 140070017] gi|432165126|emb|CCK62593.1| Conserved protein of unknown function, possibly exported [Mycobacterium canettii CIPT 140070017]
M. shigaense_orf01076	759158	755811	-	1115	62	0	0	0	COG2114	NA	T	LuxR family transcriptional regulator [Mycobacterium intracellulare MOTT-02] gi|378806752|gb|AFC50887.1| LuxR family transcriptional regulator [Mycobacterium intracellulare MOTT-02]
M. shigaense_orf01077	759321	759205	-	38	154	0	0	0	NA	NA	NA	hypothetical protein MAV_4631 [Mycobacterium avium 104] gi|254777068|ref|ZP_05218584.1| hypothetical protein MaviaA2_20714 [Mycobacterium avium subsp. avium ATCC 25291] gi|417748004|ref|ZP_12396458.1| hypothetical protein MAPs_40320 [Mycobacterium av ...
M. shigaense_orf01080	761487	759403	-	694	46	0	0	0	COG1835	NA	I	acyltransferase domain-containing protein [Mycobacterium avium 104] gi|118166550|gb|ABK67447.1| putative acyltransferase domain protein [Mycobacterium avium 104]
M. shigaense_orf01081	762483	761608	-	291	91	0	0	0	NA	NOG137882;NOG43035	S	esterase [Mycobacterium parascrofulaceum ATCC BAA-614] gi|295896801|gb|EFG76432.1| esterase [Mycobacterium parascrofulaceum ATCC BAA-614]
M. shigaense_orf01083	762694	763839	+	381	58	0	0	0	COG2141	NA	C	alkanesulfonate monooxygenase [Mycobacterium colombiense CECT 3035] gi|400333215|gb|EJO90709.1| alkanesulfonate monooxygenase [Mycobacterium colombiense CECT 3035]
M. shigaense_orf01084	763842	765176	+	444	63	0	0	0	COG0477	NA	P,R,E,G	major facilitator superfamily protein [Mycobacterium colombiense CECT 3035] gi|400333214|gb|EJO90708.1| major facilitator superfamily protein [Mycobacterium colombiense CECT 3035]
M. shigaense_orf01086	765269	765481	+	70	73	0	0	0	NA	NA	NA	thiopurine S-methyltransferase family protein [Mycobacterium parascrofulaceum ATCC BAA-614] gi|295896803|gb|EFG76434.1| thiopurine S-methyltransferase family protein [Mycobacterium parascrofulaceum ATCC BAA-614]
M. shigaense_orf01087	765569	766861	+	430	79	0	0	0	COG1113	NA	E	GABA permease [Mycobacterium indicus pranii MTCC 9506] gi|405131352|gb|AFS16607.1| GABA permease [Mycobacterium indicus pranii MTCC 9506]
M. shigaense_orf01088	767253	766858	-	131	105	0	1	0	NA	NOG44272	NA	hypothetical protein MCOL_V200705 [Mycobacterium colombiense CECT 3035] gi|400333210|gb|EJO90704.1| hypothetical protein MCOL_V200705 [Mycobacterium colombiense CECT 3035]
M. shigaense_orf01090	767215	767370	+	51	53	1	0	0	NA	NA	NA	NA
M. shigaense_orf01091	767532	768746	+	404	122	0	0	1	COG0001	NA	H	glutamate-1-semialdehyde aminotransferase [Mycobacterium intracellulare MOTT-02] gi|378806735|gb|AFC50870.1| glutamate-1-semialdehyde aminotransferase [Mycobacterium intracellulare MOTT-02]
M. shigaense_orf01093	768746	769354	+	202	131	0	0	0	COG0406	NA	G	phosphoglycerate mutase family protein [Mycobacterium intracellulare MOTT-64] gi|387877909|ref|YP_006308213.1| phosphoglycerate mutase family protein [Mycobacterium sp. MOTT36Y] gi|406032799|ref|YP_006731691.1| phosphoglycerate mutase family protein ...
M. shigaense_orf01094	769357	769953	+	198	407	0	0	0	COG0526	NA	C,O	thioredoxin protein (thiol-disulfide interchange protein) [Mycobacterium parascrofulaceum ATCC BAA-614] gi|295896809|gb|EFG76440.1| thioredoxin protein (thiol-disulfide interchange protein) [Mycobacterium parascrofulaceum ATCC BAA-614]
M. shigaense_orf01096	770004	770741	+	245	83	0	0	1	COG0785	NA	O	cytochrome c biogenesis membrane protein [Mycobacterium parascrofulaceum ATCC BAA-614] gi|295896810|gb|EFG76441.1| cytochrome c biogenesis membrane protein [Mycobacterium parascrofulaceum ATCC BAA-614]
M. shigaense_orf01097	770738	772372	+	544	62	0	0	1	COG1333	NA	O	membrane protein required for cytochrome c biosynthesis protein [Mycobacterium parascrofulaceum ATCC BAA-614] gi|295896811|gb|EFG76442.1| membrane protein required for cytochrome c biosynthesis protein [Mycobacterium parascrofulaceum ATCC BAA-614]
M. shigaense_orf01098	772369	773346	+	325	72	0	0	1	COG0755	NA	O	cytochrome c assembly family protein [Mycobacterium parascrofulaceum ATCC BAA-614] gi|295896812|gb|EFG76443.1| cytochrome c assembly family protein [Mycobacterium parascrofulaceum ATCC BAA-614]
M. shigaense_orf01099	773407	774672	+	421	165	0	0	0	COG0455	NA	D	hypothetical protein OCQ_46130 [Mycobacterium intracellulare MOTT-64] gi|443307689|ref|ZP_21037476.1| hypothetical protein W7U_18620 [Mycobacterium sp. H4Y] gi|378811991|gb|AFC56125.1| hypothetical protein OCQ_46130 [Mycobacterium intracellulare MOTT ...
M. shigaense_orf01100	775745	774669	-	358	450	0	0	0	COG2801	NA	L	integrase catalytic subunit [Mycobacterium sp. MCS] gi|108769040|gb|ABG07762.1| Integrase, catalytic region [Mycobacterium sp. MCS]
M. shigaense_orf01101	775964	775803	-	53	961	0	0	0	NA	NA	NA	hypothetical protein MintA_03326 [Mycobacterium intracellulare ATCC 13950] gi|379749196|ref|YP_005340017.1| hypothetical protein OCU_44770 [Mycobacterium intracellulare ATCC 13950] gi|379764048|ref|YP_005350445.1| hypothetical protein OCQ_46120 [Myco ...
M. shigaense_orf01102	776009	776383	+	124	61	0	0	0	NA	NOG251818	S	B1306.01 protein [Mycobacterium leprae]
M. shigaense_orf01103	777387	776380	-	335	92	0	0	0	COG0332	NA	I	3-oxoacyl-(acyl-carrier-protein) synthase III [Mycobacterium avium subsp. paratuberculosis S397] gi|336460495|gb|EGO39390.1| 3-oxoacyl-(acyl-carrier-protein) synthase III [Mycobacterium avium subsp. paratuberculosis S397]
M. shigaense_orf01106	778378	777500	-	292	87	0	0	1	COG1575	NA	H	1,4-dihydroxy-2-naphthoate octaprenyltransferase [Mycobacterium rhodesiae JS60] gi|353190494|gb|EHB56004.1| 1,4-dihydroxy-2-naphthoate octaprenyltransferase [Mycobacterium rhodesiae JS60]
M. shigaense_orf01107	778422	779189	+	255	49	0	0	0	COG0005	NA	F	5'-methylthioadenosine phosphorylase [Mycobacterium colombiense CECT 3035] gi|400333197|gb|EJO90691.1| 5'-methylthioadenosine phosphorylase [Mycobacterium colombiense CECT 3035]
M. shigaense_orf01109	779192	780205	+	337	63	0	0	0	COG0451	NA	M,G	UDP-glucose 4-epimerase GalE3 [Mycobacterium canettii CIPT 140070010] gi|432161219|emb|CCK58556.1| UDP-glucose 4-epimerase GalE3 [Mycobacterium canettii CIPT 140070010]
M. shigaense_orf01110	781882	780230	-	550	65	0	0	0	NA	NOG45448	NA	hypothetical protein MCOL_V200630 [Mycobacterium colombiense CECT 3035] gi|400333195|gb|EJO90689.1| hypothetical protein MCOL_V200630 [Mycobacterium colombiense CECT 3035]
M. shigaense_orf01113	782171	783865	+	564	182	0	0	0	NA	NOG83958	S	hypothetical protein OCQ_46040 [Mycobacterium intracellulare MOTT-64] gi|378811982|gb|AFC56116.1| hypothetical protein OCQ_46040 [Mycobacterium intracellulare MOTT-64]
M. shigaense_orf01115	783890	784336	+	148	140	0	0	0	COG0463	NA	M	hypothetical protein MintA_19072 [Mycobacterium intracellulare ATCC 13950] gi|379756504|ref|YP_005345176.1| hypothetical protein OCO_44920 [Mycobacterium intracellulare MOTT-02] gi|387877895|ref|YP_006308199.1| hypothetical protein W7S_22615 [Mycobac ...
M. shigaense_orf01118	784518	784712	+	64	89	0	0	0	NA	NA	NA	NA
M. shigaense_orf01120	785956	784724	-	410	86	0	0	0	COG0531	NA	E	amino acid permease-associated protein [Mycobacterium sp. JLS] gi|126233839|gb|ABN97239.1| amino acid/polyamine/organocation transporter, APC superfamily [Mycobacterium sp. JLS]
M. shigaense_orf01123	787317	785965	-	450	114	0	0	0	NA	NA	NA	putative integral membrane protein [Mycobacterium tusciae JS617] gi|373545665|gb|EHP72472.1| putative integral membrane protein [Mycobacterium tusciae JS617]
M. shigaense_orf01124	788426	787329	-	365	313	0	0	0	COG0318	NA	I,Q	O-succinylbenzoic acid--CoA ligase [Mycobacterium avium subsp. paratuberculosis K-10] gi|417747974|ref|ZP_12396428.1| acyl-CoA synthetase (AMP-forming)/AMP-acid ligase II [Mycobacterium avium subsp. paratuberculosis S397] gi|440779509|ref|ZP_20958226 ...
M. shigaense_orf01125	788809	788471	-	112	1557	0	0	0	NA	NOG08636	NA	hypothetical protein ML2258 [Mycobacterium leprae TN] gi|221230683|ref|YP_002504099.1| hypothetical protein MLBr_02258 [Mycobacterium leprae Br4923] gi|699352|gb|AAA63112.1| u296w [Mycobacterium leprae] gi|13093760|emb|CAC31214.1| conserved hypotheti ...
M. shigaense_orf01127	789162	788863	-	99	324	0	1	0	NA	NOG286556	NA	hypothetical protein MAP4040c [Mycobacterium avium subsp. paratuberculosis K-10] gi|417747972|ref|ZP_12396426.1| hypothetical protein MAPs_40000 [Mycobacterium avium subsp. paratuberculosis S397] gi|440779511|ref|ZP_20958228.1| hypothetical protein D ...
M. shigaense_orf01128	790349	789159	-	396	252	0	0	0	COG0306	NA	P	phosphate/sulfate permease [Mycobacterium avium subsp. paratuberculosis S397] gi|336460482|gb|EGO39377.1| phosphate/sulfate permease [Mycobacterium avium subsp. paratuberculosis S397]
M. shigaense_orf01129	790875	790468	-	135	162	0	0	1	COG0346	NA	E	glyoxalase [Mycobacterium parascrofulaceum ATCC BAA-614] gi|295896740|gb|EFG76373.1| glyoxalase [Mycobacterium parascrofulaceum ATCC BAA-614]
M. shigaense_orf01130	791794	790898	-	298	97	0	0	0	COG1028	NA	I,Q,R	short chain dehydrogenase [Mycobacterium colombiense CECT 3035] gi|400333185|gb|EJO90679.1| short chain dehydrogenase [Mycobacterium colombiense CECT 3035]
M. shigaense_orf01132	792730	791828	-	300	150	0	0	1	COG0447	NA	H	naphthoate synthase [Mycobacterium colombiense CECT 3035] gi|400333184|gb|EJO90678.1| naphthoate synthase [Mycobacterium colombiense CECT 3035]
M. shigaense_orf01134	792920	792723	-	65	211	0	1	0	NA	NA	NA	cell entry (mce) related family protein [Mycobacterium intracellulare MOTT-64] gi|387877885|ref|YP_006308189.1| cell entry (mce) related family protein [Mycobacterium sp. MOTT36Y] gi|443307670|ref|ZP_21037457.1| cell entry (mce) related family protei ...
M. shigaense_orf01136	794023	794571	+	182	127	0	0	0	COG1309	NA	K	TetR family transcriptional regulator [Mycobacterium parascrofulaceum ATCC BAA-614] gi|295896745|gb|EFG76378.1| TetR family transcriptional regulator [Mycobacterium parascrofulaceum ATCC BAA-614]
M. shigaense_orf01137	793938	793000	-	312	184	0	0	0	COG0667	NA	C	hypothetical protein MCOL_V200565 [Mycobacterium colombiense CECT 3035] gi|400333182|gb|EJO90676.1| hypothetical protein MCOL_V200565 [Mycobacterium colombiense CECT 3035]
M. shigaense_orf01138	796267	794666	-	533	83	0	0	0	COG0318	NA	I,Q	acyl-CoA synthetase [Mycobacterium colombiense CECT 3035] gi|400333180|gb|EJO90674.1| acyl-CoA synthetase [Mycobacterium colombiense CECT 3035]
M. shigaense_orf01140	796402	798006	+	534	61	0	0	0	COG1574	NA	R	amidohydrolase family protein [Mycobacterium avium subsp. avium ATCC 25291]
M. shigaense_orf01141	798012	798983	+	323	36	0	0	1	COG4948	NA	R,M	O-succinylbenzoate synthase [Mycobacterium avium 104] gi|254777023|ref|ZP_05218539.1| O-succinylbenzoate synthase [Mycobacterium avium subsp. avium ATCC 25291] gi|118166056|gb|ABK66953.1| O-succinylbenzoate synthase [Mycobacterium avium 104]
M. shigaense_orf01142	798950	799762	+	270	73	0	0	0	COG0596	NA	R	Chain A, The Structure Of Rv0554 From Mycobacterium Tuberculosis gi|241913177|pdb|3E3A|B Chain B, The Structure Of Rv0554 From Mycobacterium Tuberculosis gi|296863466|pdb|3HSS|A Chain A, A Higher Resolution Structure Of Rv0554 From Mycobacterium Tube ...
M. shigaense_orf01144	799861	801519	+	552	110	0	0	1	COG1165	NA	H	2-succinyl-5-enolpyruvyl-6-hydroxy-3-cyclohexene-1-carboxylic-acid synthase [Mycobacterium avium subsp. paratuberculosis S397] gi|336460471|gb|EGO39366.1| 2-succinyl-5-enolpyruvyl-6-hydroxy-3-cyclohexene-1-carboxylic-acid synthase [Mycobacterium aviu ...
M. shigaense_orf01145	801606	802031	+	141	67	0	0	1	NA	NOG08638	NA	hypothetical protein MMAR_0902 [Mycobacterium marinum M] gi|443489323|ref|YP_007367470.1| putative membrane protein [Mycobacterium liflandii 128FXT] gi|183174249|gb|ACC39359.1| conserved hypothetical membrane protein [Mycobacterium marinum M] gi|4425 ...
M. shigaense_orf01146	802061	803260	+	399	113	0	0	0	COG0438	NA	M	glycosyl transferase [Mycobacterium avium 104] gi|118166158|gb|ABK67055.1| glycosyl transferase [Mycobacterium avium 104]
M. shigaense_orf01147	804096	803272	-	274	216	0	0	0	COG1028	NA	I,Q,R	short chain dehydrogenase [Mycobacterium intracellulare ATCC 13950]
M. shigaense_orf01149	804161	804853	+	230	316	0	0	1	COG2226	NA	H	ubiquinone/menaquinone biosynthesis methyltransferase [Mycobacterium colombiense CECT 3035] gi|400333172|gb|EJO90666.1| ubiquinone/menaquinone biosynthesis methyltransferase [Mycobacterium colombiense CECT 3035]
M. shigaense_orf01150	805223	804861	-	120	941	0	0	0	NA	NOG12867	NA	hypothetical protein MaviaA2_20431 [Mycobacterium avium subsp. avium ATCC 25291]
M. shigaense_orf01151	805975	805301	-	224	510	0	0	0	COG0500	NA	Q,R	Putative benzoquinone methyltransferase (methylase) [Mycobacterium canettii CIPT 140070010] gi|432161243|emb|CCK58580.1| Putative benzoquinone methyltransferase (methylase) [Mycobacterium canettii CIPT 140070010]
M. shigaense_orf01152	807272	806058	-	404	82	0	0	1	COG0644	NA	C	FAD dependent oxidoreductase, putative [Mycobacterium sp. H4Y] gi|442765021|gb|ELR83019.1| FAD dependent oxidoreductase, putative [Mycobacterium sp. H4Y]
M. shigaense_orf01153	807321	808328	+	335	123	0	0	1	COG0142	NA	H	grcC1 [Mycobacterium colombiense CECT 3035] gi|400333169|gb|EJO90663.1| grcC1 [Mycobacterium colombiense CECT 3035]
M. shigaense_orf01154	808432	809295	+	287	237	0	0	1	COG0501	NA	O	heat shock protein HtpX [Mycobacterium colombiense CECT 3035] gi|400333168|gb|EJO90662.1| heat shock protein HtpX [Mycobacterium colombiense CECT 3035]
M. shigaense_orf01156	809382	809864	+	160	298	0	0	0	COG0229	NA	O	methionine-R-sulfoxide reductase [Mycobacterium smegmatis JS623] gi|433296937|gb|AGB22757.1| methionine-R-sulfoxide reductase [Mycobacterium smegmatis JS623]
M. shigaense_orf01157	811423	809879	-	514	328	0	0	0	COG0659	NA	P	carbonate dehydratase [Mycobacterium colombiense CECT 3035] gi|400333166|gb|EJO90660.1| carbonate dehydratase [Mycobacterium colombiense CECT 3035]
M. shigaense_orf01158	812695	811670	-	341	126	0	0	0	COG0240	NA	C	NAD(P)H-dependent glycerol-3-phosphate dehydrogenase [Mycobacterium colombiense CECT 3035] gi|400333165|gb|EJO90659.1| NAD(P)H-dependent glycerol-3-phosphate dehydrogenase [Mycobacterium colombiense CECT 3035]
M. shigaense_orf01159	813055	814317	+	420	94	0	0	0	NA	NOG291600	NA	trypsin family serine protease [Mycobacterium parascrofulaceum ATCC BAA-614] gi|295896260|gb|EFG75921.1| trypsin family serine protease [Mycobacterium parascrofulaceum ATCC BAA-614]
M. shigaense_orf01162	815836	814325	-	503	101	0	0	0	COG2072	NA	P	monooxygenase, flavin-binding family protein [Mycobacterium intracellulare ATCC 13950] gi|378801517|gb|AFC45653.1| monooxygenase, flavin-binding family protein [Mycobacterium intracellulare ATCC 13950]
M. shigaense_orf01163	816372	815869	-	167	74	0	0	0	NA	NA	NA	hypothetical protein MaviaA2_00134 [Mycobacterium avium subsp. avium ATCC 25291]
M. shigaense_orf01164	817489	816980	-	169	304	1	0	0	NA	NA	NA	hypothetical protein AS9A_3524 [Amycolicicoccus subflavus DQS3-9A1] gi|333483404|gb|AEF41964.1| hypothetical protein AS9A_3524 [Amycolicicoccus subflavus DQS3-9A1]
M. shigaense_orf01165	816986	816369	-	205	116	1	0	0	NA	NA	NA	hypothetical protein AS9A_3525 [Amycolicicoccus subflavus DQS3-9A1] gi|333483405|gb|AEF41965.1| hypothetical protein AS9A_3525 [Amycolicicoccus subflavus DQS3-9A1]
M. shigaense_orf01167	818055	817564	-	163	94	0	0	0	COG1666	NA	S	nucleotide-binding protein [Mycobacterium avium 104] gi|254777007|ref|ZP_05218523.1| putative nucleotide-binding protein [Mycobacterium avium subsp. avium ATCC 25291] gi|166227270|sp|A0QLB6.1|Y4575_MYCA1 RecName: Full=UPF0234 protein MAV_4575 gi|1181 ...
M. shigaense_orf01168	818405	818268	-	45	102	1	0	0	NA	NA	NA	NA
M. shigaense_orf01169	818548	819732	+	394	104	0	0	0	COG1960	NA	I	pigment production hydroxylase [Mycobacterium parascrofulaceum ATCC BAA-614] gi|295898022|gb|EFG77600.1| pigment production hydroxylase [Mycobacterium parascrofulaceum ATCC BAA-614]
M. shigaense_orf01170	819791	821053	+	420	66	0	0	0	COG2124	NA	Q	putative cytochrome P450 [Mycobacterium abscessus M93] gi|420862401|ref|ZP_15325797.1| steroid C27-monooxygenase [Mycobacterium abscessus 4S-0303] gi|420866986|ref|ZP_15330373.1| steroid C27-monooxygenase [Mycobacterium abscessus 4S-0726-RA] gi|42087 ...
M. shigaense_orf01171	822114	821164	-	316	377	0	0	0	COG2801	NA	L	integrase catalytic subunit [Mycobacterium sp. MCS] gi|108800901|ref|YP_641098.1| integrase catalytic subunit [Mycobacterium sp. MCS] gi|119868626|ref|YP_938578.1| integrase catalytic subunit [Mycobacterium sp. KMS] gi|119870041|ref|YP_939993.1| inte ...
M. shigaense_orf01172	823362	822220	-	380	58	0	0	0	COG4638	NA	P,R	Rieske (2Fe-2S) domain-containing protein [Mycobacterium xenopi RIVM700367] gi|383330549|gb|EID09070.1| Rieske (2Fe-2S) domain-containing protein [Mycobacterium xenopi RIVM700367]
M. shigaense_orf01174	824441	824223	-	72	563	0	0	0	NA	NA	NA	NA
M. shigaense_orf01175	825825	824653	-	390	85	0	0	0	NA	NOG248747	S	hypothetical protein MCOL_V200375 [Mycobacterium colombiense CECT 3035] gi|400333144|gb|EJO90638.1| hypothetical protein MCOL_V200375 [Mycobacterium colombiense CECT 3035]
M. shigaense_orf01177	828685	826094	-	863	69	0	0	0	NA	NA	NA	adenylyl cyclase class-3/4/guanylyl cyclase [Mycobacterium sp. JLS] gi|126233664|gb|ABN97064.1| adenylyl cyclase class-3/4/guanylyl cyclase [Mycobacterium sp. JLS]
M. shigaense_orf01178	829030	828695	-	111	35	0	1	0	NA	NA	NA	cytochrome P450 hydroxylase [Mycobacterium parascrofulaceum ATCC BAA-614] gi|295896779|gb|EFG76412.1| cytochrome P450 hydroxylase [Mycobacterium parascrofulaceum ATCC BAA-614]
M. shigaense_orf01179	831279	829087	-	730	59	0	0	0	COG1289	NA	S	hypothetical protein MCOL_V200355 [Mycobacterium colombiense CECT 3035] gi|400333140|gb|EJO90634.1| hypothetical protein MCOL_V200355 [Mycobacterium colombiense CECT 3035]
M. shigaense_orf01181	831341	832435	+	364	53	0	0	0	COG1085	NA	C	UTP-hexose-1-phosphate uridylyltransferase [Mycobacterium parascrofulaceum ATCC BAA-614] gi|295898809|gb|EFG78323.1| UTP-hexose-1-phosphate uridylyltransferase [Mycobacterium parascrofulaceum ATCC BAA-614]
M. shigaense_orf01182	832432	833553	+	373	51	0	0	0	COG0153	NA	G	galactokinase [Mycobacterium avium 104] gi|254776996|ref|ZP_05218512.1| galactokinase [Mycobacterium avium subsp. avium ATCC 25291] gi|118167339|gb|ABK68236.1| galactokinase [Mycobacterium avium 104]
M. shigaense_orf01183	833574	833693	+	39	88	0	0	0	NA	NA	NA	NA
M. shigaense_orf01184	834299	833925	-	124	63	0	0	0	NA	NOG77730	NA	conserved hypothetical protein [Mycobacterium parascrofulaceum ATCC BAA-614] gi|295896729|gb|EFG76363.1| conserved hypothetical protein [Mycobacterium parascrofulaceum ATCC BAA-614]
M. shigaense_orf01186	834427	837009	+	860	45	0	0	0	COG3537	NA	G	alpha-1,2-mannosidase family protein [Mycobacterium parascrofulaceum ATCC BAA-614] gi|295896731|gb|EFG76365.1| alpha-1,2-mannosidase family protein [Mycobacterium parascrofulaceum ATCC BAA-614]
M. shigaense_orf01189	839405	837018	-	795	56	0	0	0	COG0392	NA	S	hypothetical protein MAV_4559 [Mycobacterium avium 104] gi|118167477|gb|ABK68374.1| conserved hypothetical protein [Mycobacterium avium 104]
M. shigaense_orf01190	839567	840514	+	315	116	0	0	0	COG3315	NA	Q	methyltransferase, putative, TIGR00027 family [Mycobacterium avium subsp. paratuberculosis S397] gi|336460602|gb|EGO39495.1| methyltransferase, putative, TIGR00027 family [Mycobacterium avium subsp. paratuberculosis S397]
M. shigaense_orf01192	840547	841062	+	171	111	0	0	0	COG0778	NA	C	nitroreductase [Mycobacterium marinum M] gi|183174306|gb|ACC39416.1| nitroreductase [Mycobacterium marinum M]
M. shigaense_orf01193	842358	841078	-	426	72	0	0	0	COG2124	NA	Q	cytochrome P450 [Mycobacterium vanbaalenii PYR-1] gi|119954244|gb|ABM11249.1| cytochrome P450 [Mycobacterium vanbaalenii PYR-1]
M. shigaense_orf01196	843794	842355	-	479	52	0	0	0	COG0446	NA	R	ferredoxin reductase [Streptomyces tubercidicus]
M. shigaense_orf01198	844004	843804	-	66	87	0	0	0	NA	NOG224469	NA	ferredoxin reductase [Mycobacterium liflandii 128FXT] gi|442583504|gb|AGC62647.1| ferredoxin reductase [Mycobacterium liflandii 128FXT]
M. shigaense_orf01199	844111	845115	+	334	75	0	0	0	COG1752	NA	R	phospholipase, patatin family protein [Mycobacterium indicus pranii MTCC 9506] gi|405131270|gb|AFS16525.1| Phospholipase, patatin family protein [Mycobacterium indicus pranii MTCC 9506]
M. shigaense_orf01200	845938	845243	-	231	111	0	0	0	COG1024	NA	I	enoyl-CoA hydratase [Mycobacterium parascrofulaceum ATCC BAA-614] gi|295896713|gb|EFG76348.1| enoyl-CoA hydratase [Mycobacterium parascrofulaceum ATCC BAA-614]
M. shigaense_orf01201	846850	846017	-	277	99	0	0	0	NA	NOG40230	S	hypothetical protein W7S_22290 [Mycobacterium sp. MOTT36Y] gi|443307614|ref|ZP_21037401.1| hypothetical protein W7U_18245 [Mycobacterium sp. H4Y] gi|386791288|gb|AFJ37407.1| hypothetical protein W7S_22290 [Mycobacterium sp. MOTT36Y] gi|442764982|gb|E ...
M. shigaense_orf01202	847668	846946	-	240	81	0	0	0	COG0491	NA	R	metallo-beta-lactamase family protein [Mycobacterium intracellulare ATCC 13950] gi|387877829|ref|YP_006308133.1| metallo-beta-lactamase family protein [Mycobacterium sp. MOTT36Y] gi|443307613|ref|ZP_21037400.1| metallo-beta-lactamase family protein [ ...
M. shigaense_orf01203	847782	847982	+	66	153	0	0	0	COG5450	NA	K	Conserved protein of unknown function [Mycobacterium canettii CIPT 140060008] gi|433633670|ref|YP_007267297.1| Conserved protein of unknown function [Mycobacterium canettii CIPT 140070017] gi|433640756|ref|YP_007286515.1| Conserved protein of unknown ...
M. shigaense_orf01204	848326	848475	+	49	411	0	0	1	COG0267	NA	J	50S ribosomal protein L33 [Mycobacterium tuberculosis CDC1551] gi|31791818|ref|NP_854311.1| 50S ribosomal protein L33 [Mycobacterium bovis AF2122/97] gi|57116764|ref|YP_177630.1| 50S ribosomal protein L33 RpmG2 [Mycobacterium tuberculosis H37Rv] gi|1 ...
M. shigaense_orf01206	848533	849012	+	159	199	0	0	0	NA	NOG08314;NOG228201	S	(3R)-hydroxyacyl-ACP dehydratase subunit HadA [Mycobacterium tuberculosis H37Rv] gi|15840038|ref|NP_335075.1| (3R)-hydroxyacyl-ACP dehydratase subunit HadA [Mycobacterium tuberculosis CDC1551] gi|31791819|ref|NP_854312.1| (3R)-hydroxyacyl-ACP dehydra ...
M. shigaense_orf01207	848972	849427	+	151	222	0	0	1	COG2030	NA	I	putative MaoC like domain protein [Mycobacterium tuberculosis SUMu012] gi|308367146|gb|EFP55997.1| putative MaoC like domain protein [Mycobacterium tuberculosis SUMu012]
M. shigaense_orf01208	849441	849941	+	166	157	0	0	0	NA	NOG08314	S	(3R)-hydroxyacyl-ACP dehydratase subunit HadC [Mycobacterium leprae TN] gi|221230499|ref|YP_002503915.1| (3R)-hydroxyacyl-ACP dehydratase subunit HadC [Mycobacterium leprae Br4923] gi|115311205|sp|Q9CBJ8.1|Y1908_MYCLE RecName: Full=UPF0336 protein ML ...
M. shigaense_orf01211	850317	850760	+	147	681	0	0	0	COG0690	NA	U	preprotein translocase subunit SecE [Mycobacterium colombiense CECT 3035] gi|400333104|gb|EJO90598.1| preprotein translocase subunit SecE [Mycobacterium colombiense CECT 3035]
M. shigaense_orf01212	850793	851554	+	253	411	0	0	1	COG0250	NA	K	transcription antitermination protein NusG [Mycobacterium colombiense CECT 3035] gi|400333103|gb|EJO90597.1| transcription antitermination protein NusG [Mycobacterium colombiense CECT 3035]
M. shigaense_orf01213	851650	852078	+	142	383	0	0	1	COG0080	NA	J	50S ribosomal protein L11 [Mycobacterium intracellulare ATCC 13950] gi|379749111|ref|YP_005339932.1| 50S ribosomal protein L11 [Mycobacterium intracellulare ATCC 13950] gi|379756428|ref|YP_005345100.1| 50S ribosomal protein L11 [Mycobacterium intrace ...
M. shigaense_orf01214	852156	852863	+	235	420	0	0	1	COG0081	NA	J	50S ribosomal protein L1 [Mycobacterium indicus pranii MTCC 9506] gi|405131256|gb|AFS16511.1| 50S ribosomal protein L1 [Mycobacterium indicus pranii MTCC 9506]
M. shigaense_orf01215	854105	852867	-	412	204	0	0	0	COG4941	NA	K	hypothetical protein W7U_18190 [Mycobacterium sp. H4Y] gi|442764971|gb|ELR82969.1| hypothetical protein W7U_18190 [Mycobacterium sp. H4Y]
M. shigaense_orf01217	854813	854115	-	232	91	0	1	0	NA	NOG245048;NOG254075;NOG290418	S	DGPF domain-containing protein [Mycobacterium colombiense CECT 3035] gi|400333099|gb|EJO90593.1| DGPF domain-containing protein [Mycobacterium colombiense CECT 3035]
M. shigaense_orf01218	855809	854913	-	298	93	0	0	0	COG2230	NA	M	mmaA4 [Mycobacterium colombiense CECT 3035] gi|400333098|gb|EJO90592.1| mmaA4 [Mycobacterium colombiense CECT 3035]
M. shigaense_orf01219	856834	855983	-	283	84	0	0	0	COG2230	NA	M	Methoxy mycolic acid synthase 3 MmaA3 (methyl mycolic acid synthase 3) (MMA3) (hydroxy mycolic acid synthase) [Mycobacterium tuberculosis H37Rv] gi|31791827|ref|NP_854320.1| methoxy mycolic acid synthase [Mycobacterium bovis AF2122/97] gi|148660417|r ...
M. shigaense_orf01220	857888	857025	-	287	122	0	0	0	COG2230	NA	M	methoxy mycolic acid synthase 5 MmaA5_1 [Mycobacterium intracellulare ATCC 13950] gi|379746596|ref|YP_005337417.1| methoxy mycolic acid synthase 5 MmaA5 [Mycobacterium intracellulare ATCC 13950] gi|378798960|gb|AFC43096.1| methoxy mycolic acid syntha ...
M. shigaense_orf01222	858767	857907	-	286	149	0	0	0	COG2230	NA	M	methoxy mycolic acid synthase 1 [Mycobacterium colombiense CECT 3035] gi|400333097|gb|EJO90591.1| methoxy mycolic acid synthase 1 [Mycobacterium colombiense CECT 3035]
M. shigaense_orf01224	859782	858865	-	305	66	0	0	0	COG0596	NA	R	LipG [Mycobacterium intracellulare ATCC 13950] gi|379749105|ref|YP_005339926.1| lipG [Mycobacterium intracellulare ATCC 13950] gi|379756422|ref|YP_005345094.1| lipG [Mycobacterium intracellulare MOTT-02] gi|379763961|ref|YP_005350358.1| lipG [Mycobac ...
M. shigaense_orf01225	861128	859782	-	448	97	0	0	1	COG0661	NA	R	hypothetical protein MCOL_V200130 [Mycobacterium colombiense CECT 3035] gi|400333095|gb|EJO90589.1| hypothetical protein MCOL_V200130 [Mycobacterium colombiense CECT 3035]
M. shigaense_orf01226	861501	861262	-	79	53	0	1	0	NA	NA	NA	hypothetical protein W7S_22205 [Mycobacterium sp. MOTT36Y] gi|386791271|gb|AFJ37390.1| hypothetical protein W7S_22205 [Mycobacterium sp. MOTT36Y]
M. shigaense_orf01229	861599	865798	+	1399	69	0	0	0	COG0383	NA	G	alpha-mannosidase [Mycobacterium intracellulare MOTT-02] gi|378806634|gb|AFC50769.1| alpha-mannosidase [Mycobacterium intracellulare MOTT-02]
M. shigaense_orf01230	865795	866415	+	206	44	0	0	0	NA	NOG239407;NOG39289	S	malonyl CoA-acyl carrier protein transacylase, FabD2 [Mycobacterium marinum M] gi|443489476|ref|YP_007367623.1| malonyl CoA-acyl carrier protein transacylase, FabD2 [Mycobacterium liflandii 128FXT] gi|183174332|gb|ACC39442.1| malonyl CoA-acyl carrier ...
M. shigaense_orf01231	866422	867327	+	301	46	0	0	0	COG1940	NA	K,G	N-acylmannosamine kinase [Mycobacterium rhodesiae JS60] gi|353190782|gb|EHB56292.1| N-acylmannosamine kinase [Mycobacterium rhodesiae JS60]
M. shigaense_orf01234	867590	868213	+	207	187	0	0	1	COG0244	NA	J	50S ribosomal protein L10 [Mycobacterium parascrofulaceum ATCC BAA-614] gi|295896686|gb|EFG76323.1| 50S ribosomal protein L10 [Mycobacterium parascrofulaceum ATCC BAA-614]
M. shigaense_orf01235	868264	868659	+	131	569	0	0	1	COG0222	NA	J	50S ribosomal protein L7/L12 [Mycobacterium colombiense CECT 3035] gi|400333088|gb|EJO90582.1| 50S ribosomal protein L7/L12 [Mycobacterium colombiense CECT 3035]
M. shigaense_orf01237	869398	868667	-	243	68	0	0	0	NA	NOG236448	NA	TetR family transcriptional regulator [Mycobacterium colombiense CECT 3035] gi|400333087|gb|EJO90581.1| TetR family transcriptional regulator [Mycobacterium colombiense CECT 3035]
M. shigaense_orf01238	869470	870981	+	503	103	0	0	0	COG3670	NA	Q	Sim14 protein [Mycobacterium avium subsp. avium ATCC 25291]
M. shigaense_orf01240	871162	872172	+	336	494	0	0	1	COG1127	NA	Q	ABC transporter ATP-binding protein [Mycobacterium tuberculosis CDC1551] gi|167967499|ref|ZP_02549776.1| ribonucleotide ABC transporter ATP-binding protein Mkl [Mycobacterium tuberculosis H37Ra] gi|294996174|ref|ZP_06801865.1| ABC transporter, ATP-bi ...
M. shigaense_orf01241	872669	872514	-	51	1374	1	0	0	NA	NA	NA	hypothetical protein OCU_43730 [Mycobacterium intracellulare ATCC 13950] gi|379756409|ref|YP_005345081.1| hypothetical protein OCO_43970 [Mycobacterium intracellulare MOTT-02] gi|379763947|ref|YP_005350344.1| hypothetical protein OCQ_45110 [Mycobacte ...
M. shigaense_orf01242	872766	876128	+	1120	607	0	0	1	COG0085	NA	K	DNA-directed RNA polymerase subunit beta [Mycobacterium colombiense CECT 3035] gi|400333084|gb|EJO90578.1| DNA-directed RNA polymerase subunit beta [Mycobacterium colombiense CECT 3035]
M. shigaense_orf01243	876164	880114	+	1316	491	0	0	1	COG0086	NA	K	DNA-directed RNA polymerase subunit beta prime [Mycobacterium parascrofulaceum ATCC BAA-614] gi|295896692|gb|EFG76329.1| DNA-directed RNA polymerase subunit beta prime [Mycobacterium parascrofulaceum ATCC BAA-614]
M. shigaense_orf01245	881731	880190	-	513	78	0	0	0	COG0531	NA	E	hypothetical protein MMAR_3554 [Mycobacterium marinum M] gi|183176861|gb|ACC41971.1| conserved hypothetical membrane protein [Mycobacterium marinum M]
M. shigaense_orf01246	883018	881801	-	405	65	0	0	0	COG1748	NA	E	saccharopine dehydrogenase [Mycobacterium marinum M] gi|183176862|gb|ACC41972.1| saccharopine dehydrogenase [Mycobacterium marinum M]
M. shigaense_orf01247	884584	883097	-	495	111	0	0	0	COG1012	NA	C	gamma-aminobutyraldehyde dehydrogenase [Mycobacterium marinum M] gi|183176863|gb|ACC41973.1| aldehyde dehydrogenase NAD dependent [Mycobacterium marinum M]
M. shigaense_orf01248	884867	885229	+	120	108	0	0	0	COG1522	NA	K	AsnC family transcriptional regulator [Mycobacterium gilvum PYR-GCK] gi|315445790|ref|YP_004078669.1| AsnC family transcriptional regulator [Mycobacterium gilvum Spyr1] gi|145217923|gb|ABP47327.1| transcriptional regulator, AsnC family [Mycobacterium ...
M. shigaense_orf01249	885304	886581	+	425	123	0	0	0	COG0161	NA	H	hypothetical protein MMAR_3558 [Mycobacterium marinum M] gi|443491800|ref|YP_007369947.1| aminotransferase (adenosylmethionine-8-amino-7-oxononanoate) [Mycobacterium liflandii 128FXT] gi|183176865|gb|ACC41975.1| aminotransferase (adenosylmethionine-8 ...
M. shigaense_orf01250	886683	887456	+	257	150	0	0	0	COG0648	NA	L	Putative endonuclease IV End (endodeoxyribonuclease IV) (apurinase) [Mycobacterium canettii CIPT 140070017] gi|432165297|emb|CCK62772.1| Putative endonuclease IV End (endodeoxyribonuclease IV) (apurinase) [Mycobacterium canettii CIPT 140070017]
M. shigaense_orf01252	887508	889145	+	545	946	0	0	0	COG1960	NA	I	acyl-CoA dehydrogenase [Mycobacterium avium 104] gi|118168157|gb|ABK69054.1| putative acyl-CoA dehydrogenase [Mycobacterium avium 104]
M. shigaense_orf01253	889207	890145	+	312	467	0	0	0	COG1024	NA	I	enoyl-CoA hydratase [Mycobacterium avium subsp. paratuberculosis K-10] gi|417747873|ref|ZP_12396329.1| enoyl-CoA hydratase/carnithine racemase [Mycobacterium avium subsp. paratuberculosis S397] gi|440779610|ref|ZP_20958323.1| enoyl-CoA hydratase [Myc ...
M. shigaense_orf01254	890148	890870	+	240	230	0	0	0	COG3327	NA	K	hypothetical protein MCAN_06741 [Mycobacterium canettii CIPT 140010059] gi|433629760|ref|YP_007263388.1| Conserved protein of unknown function [Mycobacterium canettii CIPT 140070010] gi|340003883|emb|CCC43014.1| conserved hypothetical protein [Mycoba ...
M. shigaense_orf01255	890867	891634	+	255	139	0	0	0	COG1024	NA	I	enoyl-CoA hydratase/carnithine racemase [Mycobacterium smegmatis JS623] gi|433295573|gb|AGB21393.1| enoyl-CoA hydratase/carnithine racemase [Mycobacterium smegmatis JS623]
M. shigaense_orf01257	891916	891650	-	88	94	0	0	0	NA	NOG40849	S	hypothetical protein OCO_43880 [Mycobacterium intracellulare MOTT-02] gi|379763938|ref|YP_005350335.1| hypothetical protein OCQ_45020 [Mycobacterium intracellulare MOTT-64] gi|378806616|gb|AFC50751.1| hypothetical protein OCO_43880 [Mycobacterium int ...
M. shigaense_orf01258	891915	892163	+	82	104	1	0	0	NA	NA	NA	NA
M. shigaense_orf01260	892528	892160	-	122	197	0	1	0	NA	NOG48146	NA	hypothetical protein MCOL_V200035 [Mycobacterium colombiense CECT 3035] gi|400333076|gb|EJO90570.1| hypothetical protein MCOL_V200035 [Mycobacterium colombiense CECT 3035]
M. shigaense_orf01261	892728	893372	+	214	68	0	0	0	NA	NOG245068;NOG235261	S	hypothetical protein MAP4139 [Mycobacterium avium subsp. paratuberculosis K-10] gi|118465892|ref|YP_883628.1| TetR family transcriptional regulator [Mycobacterium avium 104] gi|254776929|ref|ZP_05218445.1| transcriptional regulator, TetR family prote ...
M. shigaense_orf01262	893654	894028	+	124	662	0	0	1	COG0048	NA	J	30S ribosomal protein S12 [Mycobacterium smegmatis str. MC2 155] gi|296168534|ref|ZP_06850339.1| 30S ribosomal protein S12 [Mycobacterium parascrofulaceum ATCC BAA-614] gi|399985780|ref|YP_006566128.1| 30S ribosomal protein S12 [Mycobacterium smegmat ...
M. shigaense_orf01263	894028	894498	+	156	819	0	0	1	COG0049	NA	J	30S ribosomal protein S7 [Mycobacterium intracellulare ATCC 13950] gi|379749078|ref|YP_005339899.1| 30S ribosomal protein S7 [Mycobacterium intracellulare ATCC 13950] gi|379756395|ref|YP_005345067.1| 30S ribosomal protein S7 [Mycobacterium intracellu ...
M. shigaense_orf01265	894591	896696	+	701	518	0	0	0	COG0480	NA	J	elongation factor G [Mycobacterium parascrofulaceum ATCC BAA-614] gi|295896678|gb|EFG76316.1| elongation factor G [Mycobacterium parascrofulaceum ATCC BAA-614]
M. shigaense_orf01266	896879	898069	+	396	795	0	0	1	COG0050	NA	J	translation elongation factor 1A (EF-1A/EF-Tu) [Mycobacterium smegmatis JS623] gi|433295582|gb|AGB21402.1| translation elongation factor 1A (EF-1A/EF-Tu) [Mycobacterium smegmatis JS623]
M. shigaense_orf01270	898235	899065	+	276	269	0	0	0	NA	NOG287285	NA	hypothetical protein MAP4144 [Mycobacterium avium subsp. paratuberculosis K-10] gi|41399076|gb|AAS06694.1| hypothetical protein MAP_4144 [Mycobacterium avium subsp. paratuberculosis K-10]
M. shigaense_orf01272	899173	899994	+	273	134	0	0	0	NA	NOG41847	S	conserved hypothetical protein [Mycobacterium parascrofulaceum ATCC BAA-614] gi|295896604|gb|EFG76243.1| conserved hypothetical protein [Mycobacterium parascrofulaceum ATCC BAA-614]
M. shigaense_orf01273	900068	900901	+	277	83	0	0	0	COG1028	NA	I,Q,R	3-ketoacyl-ACP reductase [Mycobacterium colombiense CECT 3035] gi|400331122|gb|EJO88619.1| 3-ketoacyl-ACP reductase [Mycobacterium colombiense CECT 3035]
M. shigaense_orf01275	900956	902110	+	384	56	0	0	0	COG0446	NA	R	hypothetical protein OCQ_44880 [Mycobacterium intracellulare MOTT-64] gi|378811866|gb|AFC56000.1| hypothetical protein OCQ_44880 [Mycobacterium intracellulare MOTT-64]
M. shigaense_orf01278	902116	903105	+	329	57	0	0	0	COG0111	NA	H,E	D-3-phosphoglycerate dehydrogenase SerA4 [Mycobacterium parascrofulaceum ATCC BAA-614] gi|295897732|gb|EFG77321.1| D-3-phosphoglycerate dehydrogenase SerA4 [Mycobacterium parascrofulaceum ATCC BAA-614]
M. shigaense_orf01280	904081	903485	-	198	51	0	0	0	NA	NOG287767	NA	hypothetical protein MintA_22899 [Mycobacterium intracellulare ATCC 13950] gi|379749067|ref|YP_005339888.1| hypothetical protein OCU_43480 [Mycobacterium intracellulare ATCC 13950] gi|379756384|ref|YP_005345056.1| hypothetical protein OCO_43720 [Myco ...
M. shigaense_orf01281	904120	904257	+	45	253	0	0	0	NA	NA	NA	hypothetical protein MXEN_21592 [Mycobacterium xenopi RIVM700367] gi|383330215|gb|EID08747.1| hypothetical protein MXEN_21592 [Mycobacterium xenopi RIVM700367]
M. shigaense_orf01282	904260	904571	+	103	322	0	0	0	NA	NOG47733	S	hypothetical protein MintA_22889 [Mycobacterium intracellulare ATCC 13950]
M. shigaense_orf01283	904568	905773	+	401	105	0	0	0	COG0535	NA	R	radical SAM domain-containing protein [Mycobacterium colombiense CECT 3035] gi|400331114|gb|EJO88611.1| radical SAM domain-containing protein [Mycobacterium colombiense CECT 3035]
M. shigaense_orf01284	905776	906966	+	396	84	0	0	0	COG1304	NA	C	heme/flavin dehydrogenase, mycofactocin system [Mycobacterium avium subsp. paratuberculosis S397] gi|336460674|gb|EGO39565.1| heme/flavin dehydrogenase, mycofactocin system [Mycobacterium avium subsp. paratuberculosis S397]
M. shigaense_orf01285	907199	907930	+	243	83	0	0	0	COG1402	NA	R	creatininase [Mycobacterium parascrofulaceum ATCC BAA-614] gi|295896612|gb|EFG76251.1| creatininase [Mycobacterium parascrofulaceum ATCC BAA-614]
M. shigaense_orf01286	907965	909377	+	470	57	0	0	0	COG0463	NA	M	glycosyl transferase [Mycobacterium parascrofulaceum ATCC BAA-614] gi|295896613|gb|EFG76252.1| glycosyl transferase [Mycobacterium parascrofulaceum ATCC BAA-614]
M. shigaense_orf01287	909413	910825	+	470	47	0	0	0	COG2303	NA	E	Putative dehydrogenase [Mycobacterium canettii CIPT 140070017] gi|432165323|emb|CCK62798.1| Putative dehydrogenase [Mycobacterium canettii CIPT 140070017]
M. shigaense_orf01289	912590	913246	+	218	61	1	0	0	NA	NA	NA	hypothetical protein MXEN_15782 [Mycobacterium xenopi RIVM700367] gi|383332988|gb|EID11450.1| hypothetical protein MXEN_15782 [Mycobacterium xenopi RIVM700367]
M. shigaense_orf01290	913825	913343	-	160	168	0	1	0	NA	NOG130057	NA	transcriptional regulator [Mycobacterium parascrofulaceum ATCC BAA-614] gi|295896617|gb|EFG76256.1| transcriptional regulator [Mycobacterium parascrofulaceum ATCC BAA-614]
M. shigaense_orf01292	915316	938343	+	7675	279	0	0	0	COG1020	NA	Q	linear gramicidin synthetase subunit D [Mycobacterium colombiense CECT 3035] gi|400329233|gb|EJO86733.1| linear gramicidin synthetase subunit D [Mycobacterium colombiense CECT 3035]
M. shigaense_orf01296	938421	939743	+	440	113	1	0	0	NA	NA	NA	hypothetical protein MXEN_15792 [Mycobacterium xenopi RIVM700367] gi|383332990|gb|EID11452.1| hypothetical protein MXEN_15792 [Mycobacterium xenopi RIVM700367]
M. shigaense_orf01298	940287	939700	-	195	363	0	0	0	NA	NA	NA	transposase, ISMyma01_aa2 [Mycobacterium sp. H4Y] gi|442767246|gb|ELR85240.1| transposase, ISMyma01_aa2 [Mycobacterium sp. H4Y]
M. shigaense_orf01299	940736	940395	-	113	2667	1	0	0	NA	NA	NA	Fels-1 prophage [Verminephrobacter aporrectodeae subsp. tuberculatae At4]
M. shigaense_orf01300	941055	940924	-	43	105	0	0	0	NA	NOG147246	L	transposase, ISMyma01_aa1 [Mycobacterium sp. H4Y] gi|443306004|ref|ZP_21035792.1| transposase, ISMyma01_aa1 [Mycobacterium sp. H4Y] gi|442767245|gb|ELR85239.1| transposase, ISMyma01_aa1 [Mycobacterium sp. H4Y] gi|442767568|gb|ELR85562.1| transposase, ...
M. shigaense_orf01301	941991	941230	-	253	105	0	0	0	NA	NA	NA	hypothetical protein SCAB_3001 [Streptomyces scabiei 87.22] gi|260644425|emb|CBG67510.1| putative membrane protein [Streptomyces scabiei 87.22]
M. shigaense_orf01302	942602	942907	+	101	605	0	0	1	COG0051	NA	J	30S ribosomal protein S10 [Mycobacterium avium subsp. paratuberculosis K-10] gi|118467320|ref|YP_883607.1| 30S ribosomal protein S10 [Mycobacterium avium 104] gi|254776908|ref|ZP_05218424.1| 30S ribosomal protein S10 [Mycobacterium avium subsp. avium ...
M. shigaense_orf01304	942923	943576	+	217	396	0	0	1	COG0087	NA	J	50S ribosomal protein L3 [Mycobacterium intracellulare ATCC 13950] gi|379749056|ref|YP_005339877.1| 50S ribosomal protein L3 [Mycobacterium intracellulare ATCC 13950] gi|379756373|ref|YP_005345045.1| 50S ribosomal protein L3 [Mycobacterium intracellu ...
M. shigaense_orf01306	943576	944244	+	222	266	0	0	1	COG0088	NA	J	50S ribosomal protein L4 [Mycobacterium leprae TN] gi|221230478|ref|YP_002503894.1| 50S ribosomal protein L4 [Mycobacterium leprae Br4923] gi|3122749|sp|O32982.1|RL4_MYCLE RecName: Full=50S ribosomal protein L4 gi|254803747|sp|B8ZSB8.1|RL4_MYCLB RecN ...
M. shigaense_orf01308	944244	944546	+	100	294	0	0	1	COG0089	NA	J	50S ribosomal protein L23 [Mycobacterium avium subsp. paratuberculosis K-10] gi|118462258|ref|YP_883604.1| 50S ribosomal protein L23 [Mycobacterium avium 104] gi|254776905|ref|ZP_05218421.1| 50S ribosomal protein L23 [Mycobacterium avium subsp. avium ...
M. shigaense_orf01309	944576	945418	+	280	320	0	0	1	COG0090	NA	J	50S ribosomal protein L2 [Mycobacterium parascrofulaceum ATCC BAA-614] gi|295896623|gb|EFG76262.1| 50S ribosomal protein L2 [Mycobacterium parascrofulaceum ATCC BAA-614]
M. shigaense_orf01310	945493	945774	+	93	330	0	0	1	COG0185	NA	J	30S ribosomal protein S19 [Mycobacterium leprae TN] gi|145225621|ref|YP_001136299.1| 30S ribosomal protein S19 [Mycobacterium gilvum PYR-GCK] gi|221230475|ref|YP_002503891.1| 30S ribosomal protein S19 [Mycobacterium leprae Br4923] gi|315445974|ref|YP ...
M. shigaense_orf01312	945771	946322	+	183	246	0	0	1	COG0091	NA	J	50S ribosomal protein L22 [Mycobacterium leprae TN] gi|221230474|ref|YP_002503890.1| 50S ribosomal protein L22 [Mycobacterium leprae Br4923] gi|3122713|sp|O32986.1|RL22_MYCLE RecName: Full=50S ribosomal protein L22 gi|254800451|sp|B8ZSB4.1|RL22_MYCLB ...
M. shigaense_orf01313	946322	947164	+	280	281	0	0	1	COG0092	NA	J	30S ribosomal protein S3 [Mycobacterium sp. JDM601] gi|333487940|gb|AEF37332.1| 30S ribosomal protein S3 RpsC [Mycobacterium sp. JDM601]
M. shigaense_orf01315	947168	947584	+	138	300	0	0	1	COG0197	NA	J	50S ribosomal protein L16 [Mycobacterium colombiense CECT 3035] gi|400331099|gb|EJO88596.1| 50S ribosomal protein L16 [Mycobacterium colombiense CECT 3035]
M. shigaense_orf01316	947584	947829	+	81	335	0	0	1	COG0255	NA	J	50S ribosomal protein L29 [Mycobacterium intracellulare ATCC 13950] gi|387877761|ref|YP_006308065.1| 50S ribosomal protein L29 [Mycobacterium sp. MOTT36Y] gi|443307545|ref|ZP_21037332.1| 50S ribosomal protein L29 [Mycobacterium sp. H4Y] gi|386791219| ...
M. shigaense_orf01317	947826	948173	+	115	554	0	0	1	COG0186	NA	J	30S ribosomal protein S17 [Mycobacterium colombiense CECT 3035] gi|400331097|gb|EJO88594.1| 30S ribosomal protein S17 [Mycobacterium colombiense CECT 3035]
M. shigaense_orf01318	948289	950640	+	783	107	0	0	0	COG3119	NA	P	arylsulfatase [Mycobacterium sp. H4Y] gi|442764911|gb|ELR82909.1| arylsulfatase [Mycobacterium sp. H4Y]
M. shigaense_orf01320	950808	951746	+	312	63	0	0	0	NA	NA	NA	hypothetical protein MCOL_V216729 [Mycobacterium colombiense CECT 3035] gi|400331095|gb|EJO88592.1| hypothetical protein MCOL_V216729 [Mycobacterium colombiense CECT 3035]
M. shigaense_orf01321	952884	951748	-	378	77	0	1	0	COG0226	NA	P	phosphate ABC transporter phosphate-binding protein PstS [Mycobacterium avium 104] gi|118166949|gb|ABK67846.1| phosphate ABC transporter, phosphate-binding protein PstS [Mycobacterium avium 104]
M. shigaense_orf01322	953332	954231	+	299	81	0	0	0	NA	NOG46679	S	hypothetical protein MCOL_V216719 [Mycobacterium colombiense CECT 3035] gi|400331093|gb|EJO88590.1| hypothetical protein MCOL_V216719 [Mycobacterium colombiense CECT 3035]
M. shigaense_orf01323	954292	955191	+	299	67	0	0	0	COG1262	NA	S	sulfatase-modifying factor 1 [Mycobacterium parascrofulaceum ATCC BAA-614] gi|295896633|gb|EFG76272.1| sulfatase-modifying factor 1 [Mycobacterium parascrofulaceum ATCC BAA-614]
M. shigaense_orf01324	955284	956405	+	373	60	0	0	0	NA	NOG42964	S	hypothetical protein MCOL_V216709 [Mycobacterium colombiense CECT 3035] gi|400331091|gb|EJO88588.1| hypothetical protein MCOL_V216709 [Mycobacterium colombiense CECT 3035]
M. shigaense_orf01325	956503	957510	+	335	50	0	0	0	NA	NOG46679	S	conserved transmembrane protein [Mycobacterium tuberculosis 94_M4241A] gi|298493998|gb|EFI29292.1| conserved transmembrane protein [Mycobacterium tuberculosis 94_M4241A]
M. shigaense_orf01328	958942	957512	-	476	80	0	0	0	COG0277	NA	C	FAD binding domain-containing protein [Mycobacterium colombiense CECT 3035] gi|400331194|gb|EJO88690.1| FAD binding domain-containing protein [Mycobacterium colombiense CECT 3035]
M. shigaense_orf01329	959140	959601	+	153	112	0	0	0	NA	NOG254244	S	Pyridoxamine 5'-phosphate oxidase [Mycobacterium liflandii 128FXT] gi|442584100|gb|AGC63243.1| Pyridoxamine 5'-phosphate oxidase [Mycobacterium liflandii 128FXT]
M. shigaense_orf01331	959947	960315	+	122	387	0	0	1	COG0093	NA	J	50S ribosomal protein L14 RplN [Mycobacterium tuberculosis H37Rv] gi|15840122|ref|NP_335159.1| 50S ribosomal protein L14 [Mycobacterium tuberculosis CDC1551] gi|31791900|ref|NP_854393.1| 50S ribosomal protein L14 [Mycobacterium bovis AF2122/97] gi|41 ...
M. shigaense_orf01333	960316	960633	+	105	432	0	0	1	COG0198	NA	J	50S ribosomal protein L24 [Mycobacterium intracellulare ATCC 13950] gi|379749042|ref|YP_005339863.1| 50S ribosomal protein L24 [Mycobacterium intracellulare ATCC 13950] gi|379756358|ref|YP_005345030.1| 50S ribosomal protein L24 [Mycobacterium intrace ...
M. shigaense_orf01335	960635	961198	+	187	357	0	0	1	COG0094	NA	J	50S ribosomal protein L5 [Mycobacterium intracellulare ATCC 13950] gi|379749041|ref|YP_005339862.1| 50S ribosomal protein L5 [Mycobacterium intracellulare ATCC 13950] gi|379756357|ref|YP_005345029.1| 50S ribosomal protein L5 [Mycobacterium intracellu ...
M. shigaense_orf01336	961203	961388	+	61	515	0	0	1	COG0199	NA	J	30S ribosomal protein S14 [Mycobacterium avium subsp. paratuberculosis K-10] gi|118463275|ref|YP_883587.1| 30S ribosomal protein S14 [Mycobacterium avium 104] gi|254776888|ref|ZP_05218404.1| 30S ribosomal protein S14 [Mycobacterium avium subsp. avium ...
M. shigaense_orf01337	961532	961930	+	132	474	0	0	1	COG0096	NA	J	30S ribosomal protein S8 [Mycobacterium colombiense CECT 3035] gi|400331085|gb|EJO88582.1| 30S ribosomal protein S8 [Mycobacterium colombiense CECT 3035]
M. shigaense_orf01338	961954	962493	+	179	369	0	0	1	COG0097	NA	J	50S ribosomal protein L6 [Mycobacterium parascrofulaceum ATCC BAA-614] gi|295896641|gb|EFG76280.1| 50S ribosomal protein L6 [Mycobacterium parascrofulaceum ATCC BAA-614]
M. shigaense_orf01339	962631	962900	+	89	362	0	0	1	COG0256	NA	J	50S ribosomal protein L18 [Mycobacterium avium subsp. paratuberculosis K-10] gi|254776885|ref|ZP_05218401.1| 50S ribosomal protein L18 [Mycobacterium avium subsp. avium ATCC 25291] gi|417747820|ref|ZP_12396278.1| ribosomal protein L18, bacterial type ...
M. shigaense_orf01340	962947	963633	+	228	308	0	0	1	COG0098	NA	J	30S ribosomal protein S5 [Mycobacterium marinum M] gi|443489547|ref|YP_007367694.1| 30S ribosomal protein S5, RpsE [Mycobacterium liflandii 128FXT] gi|226703364|sp|B2HCT8.1|RS5_MYCMM RecName: Full=30S ribosomal protein S5 gi|183174400|gb|ACC39510.1| ...
M. shigaense_orf01341	963630	963830	+	66	314	0	0	1	COG1841	NA	J	50S ribosomal protein L30 [Mycobacterium sp. MOTT36Y] gi|443307478|ref|ZP_21037265.1| 50S ribosomal protein L30 [Mycobacterium sp. H4Y] gi|386791166|gb|AFJ37285.1| 50S ribosomal protein L30 [Mycobacterium sp. MOTT36Y] gi|442764846|gb|ELR82844.1| 50S ...
M. shigaense_orf01342	963827	964267	+	146	386	0	0	1	COG0200	NA	J	50S ribosomal protein L15 [Mycobacterium intracellulare ATCC 13950] gi|379749034|ref|YP_005339855.1| 50S ribosomal protein L15 [Mycobacterium intracellulare ATCC 13950] gi|379756350|ref|YP_005345022.1| 50S ribosomal protein L15 [Mycobacterium intrace ...
M. shigaense_orf01343	964633	964382	-	83	105	0	0	0	NA	NA	NA	luciferase family protein [Mycobacterium parascrofulaceum ATCC BAA-614] gi|295896646|gb|EFG76285.1| luciferase family protein [Mycobacterium parascrofulaceum ATCC BAA-614]
M. shigaense_orf01345	965313	964633	-	226	130	0	0	0	COG2141	NA	C	hypothetical protein OCO_43370 [Mycobacterium intracellulare MOTT-02] gi|378806565|gb|AFC50700.1| hypothetical protein OCO_43370 [Mycobacterium intracellulare MOTT-02]
M. shigaense_orf01347	965353	967137	+	594	181	0	0	0	COG0616	NA	U,O	Putative protease IV SppA (Endopeptidase IV) (Signal Peptide Peptidase) [Mycobacterium canettii CIPT 140070017] gi|432165350|emb|CCK62825.1| Putative protease IV SppA (Endopeptidase IV) (Signal Peptide Peptidase) [Mycobacterium canettii CIPT 14007001 ...
M. shigaense_orf01350	968153	967242	-	303	221	0	0	0	COG3315	NA	Q	methyltransferase, putative, family protein [Mycobacterium intracellulare ATCC 13950] gi|379749031|ref|YP_005339852.1| methyltransferase, putative, family protein [Mycobacterium intracellulare ATCC 13950] gi|379763883|ref|YP_005350280.1| methyltransf ...
M. shigaense_orf01352	969080	968163	-	305	201	0	0	0	COG3315	NA	Q	hypothetical protein W7S_21655 [Mycobacterium sp. MOTT36Y] gi|443307473|ref|ZP_21037260.1| hypothetical protein W7U_17520 [Mycobacterium sp. H4Y] gi|386791161|gb|AFJ37280.1| hypothetical protein W7S_21655 [Mycobacterium sp. MOTT36Y] gi|442764841|gb|E ...
M. shigaense_orf01353	970296	970087	-	69	38	1	0	0	NA	NA	NA	NA
M. shigaense_orf01354	970042	969077	-	321	196	0	0	0	COG3315	NA	Q	hypothetical protein MCOL_V216629 [Mycobacterium colombiense CECT 3035] gi|400331075|gb|EJO88572.1| hypothetical protein MCOL_V216629 [Mycobacterium colombiense CECT 3035]
M. shigaense_orf01355	970605	970751	+	48	49	0	0	0	NA	NA	NA	zinc-binding dehydrogenase [Mycobacterium xenopi RIVM700367] gi|383335966|gb|EID14379.1| zinc-binding dehydrogenase [Mycobacterium xenopi RIVM700367]
M. shigaense_orf01356	971137	970868	-	89	72	0	0	0	NA	NA	NA	methylase involved in ubiquinone/menaquinone biosynthesis [Mycobacterium smegmatis JS623] gi|433295646|gb|AGB21466.1| methylase involved in ubiquinone/menaquinone biosynthesis [Mycobacterium smegmatis JS623]
M. shigaense_orf01357	971507	973150	+	547	130	0	0	0	NA	NA	NA	carbohydrate kinase FGGY [Rhodobacter sp. SW2] gi|259023540|gb|EEW26831.1| carbohydrate kinase FGGY [Rhodobacter sp. SW2]
M. shigaense_orf01358	974252	973221	-	343	66	1	0	0	NA	NA	NA	dihydrodipicolinate reductase, family protein [Mycobacterium hassiacum DSM 44199] gi|407376061|gb|EKF25000.1| dihydrodipicolinate reductase, family protein [Mycobacterium hassiacum DSM 44199]
M. shigaense_orf01359	975133	974249	-	294	56	0	0	0	COG0491	NA	R	beta-lactamase [Mycobacterium intracellulare ATCC 13950] gi|379756342|ref|YP_005345014.1| beta-lactamase [Mycobacterium intracellulare MOTT-02] gi|379763878|ref|YP_005350275.1| beta-lactamase [Mycobacterium intracellulare MOTT-64] gi|378801390|gb|AFC ...
M. shigaense_orf01360	975837	975172	-	221	73	0	0	0	COG0235	NA	G	L-fuculose phosphate aldolase [Mycobacterium parascrofulaceum ATCC BAA-614] gi|295896652|gb|EFG76291.1| L-fuculose phosphate aldolase [Mycobacterium parascrofulaceum ATCC BAA-614]
M. shigaense_orf01362	976799	975834	-	321	51	0	0	0	COG0111	NA	H,E	2-hydroxyacid dehydrogenase [Mycobacterium intracellulare MOTT-64] gi|378811818|gb|AFC55952.1| 2-hydroxyacid dehydrogenase family protein [Mycobacterium intracellulare MOTT-64]
M. shigaense_orf01363	976854	978224	+	456	41	0	0	0	COG1070	NA	G	D-xylulose kinase XylB [Mycobacterium canettii CIPT 140070010] gi|432161407|emb|CCK58749.1| D-xylulose kinase XylB [Mycobacterium canettii CIPT 140070010]
M. shigaense_orf01364	978310	978924	+	204	233	0	0	0	NA	NOG10649	NA	conserved hypothetical protein [Mycobacterium parascrofulaceum ATCC BAA-614] gi|295896655|gb|EFG76294.1| conserved hypothetical protein [Mycobacterium parascrofulaceum ATCC BAA-614]
M. shigaense_orf01365	979857	978928	-	309	109	0	0	0	NA	NA	NA	hypothetical protein MCOL_V216599 [Mycobacterium colombiense CECT 3035] gi|400331069|gb|EJO88566.1| hypothetical protein MCOL_V216599 [Mycobacterium colombiense CECT 3035]
M. shigaense_orf01366	980789	979869	-	306	66	0	0	0	COG3315	NA	Q	hypothetical protein MCOL_V216594 [Mycobacterium colombiense CECT 3035] gi|400331068|gb|EJO88565.1| hypothetical protein MCOL_V216594 [Mycobacterium colombiense CECT 3035]
M. shigaense_orf01368	981714	980800	-	304	70	0	0	0	COG3315	NA	Q	methyltransferase [Mycobacterium parascrofulaceum ATCC BAA-614] gi|295896658|gb|EFG76297.1| methyltransferase [Mycobacterium parascrofulaceum ATCC BAA-614]
M. shigaense_orf01369	982159	983484	+	441	180	0	0	1	COG0201	NA	U	preprotein translocase subunit SecY [Mycobacterium parascrofulaceum ATCC BAA-614] gi|295896659|gb|EFG76298.1| preprotein translocase subunit SecY [Mycobacterium parascrofulaceum ATCC BAA-614]
M. shigaense_orf01371	983481	984026	+	181	257	0	0	1	COG0563	NA	F	adenylate kinase [Mycobacterium parascrofulaceum ATCC BAA-614] gi|295896660|gb|EFG76299.1| adenylate kinase [Mycobacterium parascrofulaceum ATCC BAA-614]
M. shigaense_orf01372	984065	984829	+	254	105	0	0	1	COG0024	NA	J	methionine aminopeptidase, type I [Mycobacterium avium subsp. paratuberculosis S397] gi|440779674|ref|ZP_20958386.1| methionine aminopeptidase [Mycobacterium avium subsp. paratuberculosis S5] gi|336460628|gb|EGO39519.1| methionine aminopeptidase, typ ...
M. shigaense_orf01374	984870	985415	+	181	1036	0	0	0	COG1595	NA	K	RNA polymerase sigma factor SigL [Mycobacterium avium subsp. paratuberculosis K-10] gi|41399133|gb|AAS06751.1| SigL [Mycobacterium avium subsp. paratuberculosis K-10]
M. shigaense_orf01375	985486	986253	+	255	537	0	0	0	COG5662	NA	K	probable transmembrane anti-sigma factor [Mycobacterium parascrofulaceum ATCC BAA-614] gi|295896663|gb|EFG76302.1| probable transmembrane anti-sigma factor [Mycobacterium parascrofulaceum ATCC BAA-614]
M. shigaense_orf01376	986497	986997	+	166	304	0	0	0	COG1846	NA	K	MarR family transcriptional regulator [Mycobacterium parascrofulaceum ATCC BAA-614] gi|295896664|gb|EFG76303.1| MarR family transcriptional regulator [Mycobacterium parascrofulaceum ATCC BAA-614]
M. shigaense_orf01377	987163	987585	+	140	94	0	0	0	NA	NA	NA	iron sulphur protein [Streptomyces chartreusis NRRL 12338]
M. shigaense_orf01380	987667	988644	+	325	76	0	0	0	COG1409	NA	R	metallophosphoesterase [Mycobacterium colombiense CECT 3035] gi|400331042|gb|EJO88539.1| metallophosphoesterase [Mycobacterium colombiense CECT 3035]
M. shigaense_orf01381	988641	989027	+	128	86	0	0	0	NA	NA	NA	hypothetical protein Mycsm_03672 [Mycobacterium smegmatis JS623] gi|433298130|gb|AGB23950.1| hypothetical protein Mycsm_03672 [Mycobacterium smegmatis JS623]
M. shigaense_orf01383	989979	989107	-	290	75	0	0	0	COG2084	NA	I	3-hydroxyisobutyrate dehydrogenase [Mycobacterium avium 104] gi|118165403|gb|ABK66300.1| 3-hydroxyisobutyrate dehydrogenase [Mycobacterium avium 104]
M. shigaense_orf01384	991174	990005	-	389	93	0	0	0	COG1960	NA	I	acyl-CoA dehydrogenase, FadE9 [Mycobacterium marinum M] gi|443489569|ref|YP_007367716.1| acyl-CoA dehydrogenase, FadE9 [Mycobacterium liflandii 128FXT] gi|183174424|gb|ACC39534.1| acyl-CoA dehydrogenase, FadE9 [Mycobacterium marinum M] gi|442582066|g ...
M. shigaense_orf01387	992699	991179	-	506	100	0	0	0	COG1012	NA	C	mmsA [Mycobacterium intracellulare ATCC 13950] gi|379756319|ref|YP_005344991.1| mmsA [Mycobacterium intracellulare MOTT-02] gi|379763855|ref|YP_005350252.1| mmsA [Mycobacterium intracellulare MOTT-64] gi|387877676|ref|YP_006307980.1| methylmalonate-s ...
M. shigaense_orf01388	992805	993146	+	113	70	0	0	0	NA	NA	NA	hypothetical protein MCOL_V216484 [Mycobacterium colombiense CECT 3035] gi|400331046|gb|EJO88543.1| hypothetical protein MCOL_V216484 [Mycobacterium colombiense CECT 3035]
M. shigaense_orf01389	993143	993295	+	50	45	0	0	0	NA	NA	NA	hypothetical protein W7U_17380 [Mycobacterium sp. H4Y] gi|442764813|gb|ELR82811.1| hypothetical protein W7U_17380 [Mycobacterium sp. H4Y]
M. shigaense_orf01390	993380	994186	+	268	48	0	0	0	NA	NOG42030	S	conserved hypothetical protein, partial [Mycobacterium parascrofulaceum ATCC BAA-614] gi|295896572|gb|EFG76213.1| conserved hypothetical protein [Mycobacterium parascrofulaceum ATCC BAA-614]
M. shigaense_orf01392	994225	994773	+	182	85	0	1	0	NA	NOG277885;NOG271708	NA	sigma-70 family RNA polymerase sigma factor [Mycobacterium parascrofulaceum ATCC BAA-614] gi|295896573|gb|EFG76214.1| sigma-70 family RNA polymerase sigma factor [Mycobacterium parascrofulaceum ATCC BAA-614]
M. shigaense_orf01393	994770	995465	+	231	66	0	1	0	NA	NOG295383;NOG148226	NA	Rieske (2Fe-2S) domain-containing protein [Mycobacterium colombiense CECT 3035] gi|400331044|gb|EJO88541.1| Rieske (2Fe-2S) domain-containing protein [Mycobacterium colombiense CECT 3035]
M. shigaense_orf01395	996569	995505	-	354	103	0	0	0	COG1835	NOG114204	I,S	atf1 protein [Mycobacterium chelonae]
M. shigaense_orf01396	997712	996636	-	358	145	0	0	0	COG1835	NOG114204;NOG262791	I,S	Probable acetyltransferase AtfA [Mycobacterium abscessus] gi|420911756|ref|ZP_15375068.1| putative acetyltransferase AtfA [Mycobacterium abscessus 6G-0125-R] gi|420918210|ref|ZP_15381513.1| putative acetyltransferase AtfA [Mycobacterium abscessus 6G- ...
M. shigaense_orf01397	998974	997826	-	382	139	0	0	0	COG1835	NA	I	acyltransferase 3 [Mycobacterium tusciae JS617] gi|373548486|gb|EHP75177.1| acyltransferase 3 [Mycobacterium tusciae JS617]
M. shigaense_orf01398	999515	999042	-	157	90	1	0	0	NA	NA	NA	lipoprotein [Mycobacterium leprae TN] gi|221230544|ref|YP_002503960.1| lipoprotein [Mycobacterium leprae Br4923] gi|4539120|emb|CAB39841.1| putative lipoprotein [Mycobacterium leprae] gi|13093621|emb|CAC30921.1| possible lipoprotein [Mycobacterium le ...
M. shigaense_orf01399	1000150	999527	-	207	129	0	0	0	COG1898	NA	M	dTDP-4-dehydrorhamnose 3,5-epimerase [Mycobacterium intracellulare ATCC 13950] gi|379756310|ref|YP_005344982.1| dTDP-4-dehydrorhamnose 3,5-epimerase [Mycobacterium intracellulare MOTT-02] gi|378806526|gb|AFC50661.1| dTDP-4-dehydrorhamnose 3,5-epimera ...
M. shigaense_orf01400	1001147	1000152	-	331	100	0	0	1	COG1088	NA	M	dTDP-glucose 4,6-dehydratase [Mycobacterium colombiense CECT 3035] gi|400331037|gb|EJO88534.1| dTDP-glucose 4,6-dehydratase [Mycobacterium colombiense CECT 3035]
M. shigaense_orf01401	1002041	1001175	-	288	102	0	0	0	NA	NOG234820	S	hypothetical protein MCOL_V216434 [Mycobacterium colombiense CECT 3035] gi|400331036|gb|EJO88533.1| hypothetical protein MCOL_V216434 [Mycobacterium colombiense CECT 3035]
M. shigaense_orf01403	1002907	1002062	-	281	107	0	0	0	NA	NOG234820	S	hypothetical protein MCOL_V216429 [Mycobacterium colombiense CECT 3035] gi|400331035|gb|EJO88532.1| hypothetical protein MCOL_V216429 [Mycobacterium colombiense CECT 3035]
M. shigaense_orf01404	1004465	1002936	-	509	83	0	0	0	COG0642	NA	T	cyclic nucleotide-binding protein [Mycobacterium colombiense CECT 3035] gi|400331034|gb|EJO88531.1| cyclic nucleotide-binding protein [Mycobacterium colombiense CECT 3035]
M. shigaense_orf01407	1006158	1004473	-	561	82	0	0	0	COG0492;COG3437	NA	K,T,O	FAD-dependent pyridine nucleotide-disulfide oxidoreductase protein [Mycobacterium sp. MOTT36Y] gi|443307430|ref|ZP_21037217.1| FAD-dependent pyridine nucleotide-disulfide oxidoreductase protein [Mycobacterium sp. H4Y] gi|386791118|gb|AFJ37237.1| FAD- ...
M. shigaense_orf01409	1006406	1006627	+	73	581	0	0	1	COG0361	NA	J	Translation initiation factor 1 [Rhodococcus sp. EsD8]
M. shigaense_orf01410	1006675	1006788	+	37	677	0	0	0	COG0257	NA	J	50S ribosomal protein L36 [Mycobacterium avium subsp. paratuberculosis K-10] gi|108798081|ref|YP_638278.1| 50S ribosomal protein L36 [Mycobacterium sp. MCS] gi|118464195|ref|YP_883537.1| 50S ribosomal protein L36 [Mycobacterium avium 104] gi|11847342 ...
M. shigaense_orf01411	1006992	1007366	+	124	465	0	0	1	COG0099	NA	J	30S ribosomal protein S13 [Mycobacterium parascrofulaceum ATCC BAA-614] gi|295896591|gb|EFG76232.1| 30S ribosomal protein S13 [Mycobacterium parascrofulaceum ATCC BAA-614]
M. shigaense_orf01413	1007373	1007789	+	138	361	0	0	1	COG0100	NA	J	30S ribosomal protein S11 [Mycobacterium parascrofulaceum ATCC BAA-614] gi|295896592|gb|EFG76233.1| 30S ribosomal protein S11 [Mycobacterium parascrofulaceum ATCC BAA-614]
M. shigaense_orf01414	1007800	1008405	+	201	306	0	0	1	COG0522	NA	J	30S ribosomal protein S4 [Mycobacterium sp. H4Y] gi|442764793|gb|ELR82791.1| 30S ribosomal protein S4 [Mycobacterium sp. H4Y]
M. shigaense_orf01415	1008536	1009579	+	347	436	0	0	1	COG0202	NA	K	DNA-directed RNA polymerase subunit alpha [Mycobacterium ulcerans Agy99] gi|183981110|ref|YP_001849401.1| DNA-directed RNA polymerase subunit alpha [Mycobacterium marinum M] gi|158512379|sp|A0PMB7.1|RPOA_MYCUA RecName: Full=DNA-directed RNA polymeras ...
M. shigaense_orf01416	1009637	1010185	+	182	618	0	0	1	COG0203	NA	J	50S ribosomal protein L17 [Mycobacterium colombiense CECT 3035] gi|400331026|gb|EJO88523.1| 50S ribosomal protein L17 [Mycobacterium colombiense CECT 3035]
M. shigaense_orf01417	1010325	1011035	+	236	186	0	0	1	COG0101	NA	J	tRNA pseudouridine synthase A [Mycobacterium ulcerans Agy99] gi|118568737|gb|ABL03488.1| pseudouridine synthase a, TruA [Mycobacterium ulcerans Agy99]
M. shigaense_orf01418	1011681	1011037	-	214	208	0	0	0	NA	NA	NA	Cutinase [Mycobacterium colombiense CECT 3035] gi|400331024|gb|EJO88521.1| Cutinase [Mycobacterium colombiense CECT 3035]
M. shigaense_orf01420	1012671	1011793	-	292	302	0	0	0	NA	NOG283350	NA	Cutinase [Mycobacterium parascrofulaceum ATCC BAA-614] gi|295896598|gb|EFG76239.1| Cutinase [Mycobacterium parascrofulaceum ATCC BAA-614]
M. shigaense_orf01421	1012791	1014182	+	463	86	0	0	0	NA	NA	NA	ESX conserved componant EccB4 [Mycobacterium canettii CIPT 140060008] gi|432156199|emb|CCK53457.1| ESX conserved componant EccB4 [Mycobacterium canettii CIPT 140060008]
M. shigaense_orf01423	1015475	1014147	-	442	36	0	1	0	COG1404	NA	O	peptidase [Mycobacterium intracellulare ATCC 13950]
M. shigaense_orf01424	1016854	1015466	-	462	120	1	0	0	NA	NA	NA	integral membrane protein [Mycobacterium tuberculosis str. Beijing/NITR203] gi|478743432|gb|AGJ69592.1| integral membrane protein [Mycobacterium tuberculosis str. Beijing/NITR203]
M. shigaense_orf01425	1016985	1020722	+	1245	55	0	0	0	NA	NA	NA	hypothetical protein MCAN_34641 [Mycobacterium canettii CIPT 140010059] gi|340006608|emb|CCC45795.1| putative conserved membrane protein [Mycobacterium canettii CIPT 140010059]
M. shigaense_orf01428	1020730	1021971	+	413	52	0	0	0	NA	NA	NA	hypothetical protein W7S_21365 [Mycobacterium sp. MOTT36Y] gi|386791103|gb|AFJ37222.1| hypothetical protein W7S_21365 [Mycobacterium sp. MOTT36Y]
M. shigaense_orf01429	1022048	1022374	+	108	59	0	0	0	COG4842	NA	S	conserved hypothetical protein [Mycobacterium tuberculosis 94_M4241A] gi|298496724|gb|EFI32018.1| conserved hypothetical protein [Mycobacterium tuberculosis 94_M4241A]
M. shigaense_orf01430	1022390	1022686	+	98	66	0	0	0	COG4842	NA	S	putative ESAT-6 like protein ESXT [Mycobacterium canettii CIPT 140010059] gi|433628587|ref|YP_007262216.1| ESAT-6 like protein EsxT [Mycobacterium canettii CIPT 140060008] gi|340006605|emb|CCC45792.1| putative ESAT-6 like protein ESXT [Mycobacterium ...
M. shigaense_orf01431	1023295	1023738	+	147	399	0	0	1	COG0102	NA	J	50S ribosomal protein L13 [Mycobacterium marinum M] gi|443489595|ref|YP_007367742.1| 50S ribosomal protein L13, RplM [Mycobacterium liflandii 128FXT] gi|226702885|sp|B2HCZ0.1|RL13_MYCMM RecName: Full=50S ribosomal protein L13 gi|183174452|gb|ACC39562 ...
M. shigaense_orf01432	1023735	1024232	+	165	386	0	0	1	COG0103	NA	J	30S ribosomal protein S9 [Mycobacterium intracellulare ATCC 13950] gi|378801334|gb|AFC45470.1| 30S ribosomal protein S9 [Mycobacterium intracellulare ATCC 13950]
M. shigaense_orf01433	1024382	1025719	+	445	174	0	0	1	COG1109	NA	G	phosphoglucosamine mutase [Mycobacterium avium 104] gi|158512443|sp|A0QKT1.1|GLMM_MYCA1 RecName: Full=Phosphoglucosamine mutase gi|118164437|gb|ABK65334.1| phosphoglucosamine mutase [Mycobacterium avium 104]
M. shigaense_orf01434	1025767	1026087	+	106	84	0	0	0	NA	NOG46147	NA	hypothetical protein W7U_17200 [Mycobacterium sp. H4Y] gi|442764777|gb|ELR82775.1| hypothetical protein W7U_17200 [Mycobacterium sp. H4Y]
M. shigaense_orf01435	1026090	1027511	+	473	62	0	0	0	NA	NA	NA	hypothetical protein MAV_4382 [Mycobacterium avium 104] gi|118166594|gb|ABK67491.1| conserved hypothetical protein [Mycobacterium avium 104]
M. shigaense_orf01437	1028569	1027517	-	350	64	0	0	0	COG2141	NA	C	oxidoreductase [Mycobacterium intracellulare ATCC 13950] gi|379748966|ref|YP_005339787.1| oxidoreductase [Mycobacterium intracellulare ATCC 13950] gi|379756266|ref|YP_005344938.1| oxidoreductase [Mycobacterium intracellulare MOTT-02] gi|378801330|gb| ...
M. shigaense_orf01439	1029554	1028769	-	261	93	0	0	0	NA	NOG05515	S	conserved hypothetical protein [Mycobacterium parascrofulaceum ATCC BAA-614] gi|295896558|gb|EFG76201.1| conserved hypothetical protein [Mycobacterium parascrofulaceum ATCC BAA-614]
M. shigaense_orf01440	1029810	1031627	+	605	106	0	0	1	COG0449	NA	M	glucosamine-fructose-6-phosphate aminotransferase [Mycobacterium parascrofulaceum ATCC BAA-614] gi|295896561|gb|EFG76204.1| glucosamine-fructose-6-phosphate aminotransferase [Mycobacterium parascrofulaceum ATCC BAA-614]
M. shigaense_orf01442	1031659	1032480	+	273	70	0	0	0	NA	NA	NA	hypothetical protein MMAR_1115 [Mycobacterium marinum M] gi|443489604|ref|YP_007367751.1| hypothetical protein MULP_01247 [Mycobacterium liflandii 128FXT] gi|183174461|gb|ACC39571.1| conserved hypothetical transmembrane protein [Mycobacterium marinum ...
M. shigaense_orf01443	1032607	1033305	+	232	47	0	0	0	NA	NOG45443	S	hypothetical protein MAV_4375 [Mycobacterium avium 104] gi|118163850|gb|ABK64747.1| conserved hypothetical protein [Mycobacterium avium 104]
M. shigaense_orf01446	1033379	1034530	+	383	56	0	0	0	COG2170	NA	S	carboxylate-amine ligase, YbdK family [Mycobacterium smegmatis JS623] gi|433298823|gb|AGB24643.1| carboxylate-amine ligase, YbdK family [Mycobacterium smegmatis JS623]
M. shigaense_orf01447	1034546	1036021	+	491	54	0	0	0	COG2308	NA	S	carboxylate-amine ligase, YbdK family [Mycobacterium smegmatis JS623] gi|433298823|gb|AGB24643.1| carboxylate-amine ligase, YbdK family [Mycobacterium smegmatis JS623]
M. shigaense_orf01448	1036142	1035972	-	56	52	1	0	0	NA	NA	NA	NA
M. shigaense_orf01449	1036134	1037804	+	556	46	0	0	0	COG0367	NA	E	asparagine synthase, glutamine-hydrolyzing [Mycobacterium smegmatis JS623] gi|433298822|gb|AGB24642.1| asparagine synthase, glutamine-hydrolyzing [Mycobacterium smegmatis JS623]
M. shigaense_orf01450	1037809	1039680	+	623	49	0	0	0	COG1506	NA	E	peptidase S9 prolyl oligopeptidase [Mycobacterium rhodesiae JS60] gi|353188490|gb|EHB54011.1| peptidase S9 prolyl oligopeptidase [Mycobacterium rhodesiae JS60]
M. shigaense_orf01451	1039742	1041163	+	473	111	0	0	1	COG0063;COG0062	NA	S,G	hypothetical protein MAP4256 [Mycobacterium avium subsp. paratuberculosis K-10] gi|417747741|ref|ZP_12396201.1| yjeF-like protein, hydroxyethylthiazole kinase-related protein [Mycobacterium avium subsp. paratuberculosis S397] gi|440779739|ref|ZP_2095 ...
M. shigaense_orf01452	1041183	1042577	+	464	99	0	0	0	COG0076	NA	E	glutamate decarboxylase [Mycobacterium colombiense CECT 3035] gi|400331002|gb|EJO88499.1| glutamate decarboxylase [Mycobacterium colombiense CECT 3035]
M. shigaense_orf01454	1042672	1043844	+	390	126	0	0	0	COG0787	NA	M	Alanine racemase Alr [Mycobacterium canettii CIPT 140070010] gi|432164112|emb|CCK61546.1| Alanine racemase Alr [Mycobacterium canettii CIPT 140070010]
M. shigaense_orf01456	1043900	1044952	+	350	90	0	0	0	COG0596	NA	R	hydrolase [Mycobacterium marinum M] gi|183174466|gb|ACC39576.1| conserved hypothetical hydrolase [Mycobacterium marinum M]
M. shigaense_orf01458	1044945	1045427	+	160	103	0	0	1	COG0802	NA	R	possible bifunctional ATP-binding protein/phosphotransferase [Mycobacterium parascrofulaceum ATCC BAA-614] gi|295896552|gb|EFG76196.1| possible bifunctional ATP-binding protein/phosphotransferase [Mycobacterium parascrofulaceum ATCC BAA-614]
M. shigaense_orf01461	1054241	1045404	-	2945	85	0	0	0	COG3320;COG1020	NA	Q	PstB [Mycobacterium avium]
M. shigaense_orf01462	1055192	1054263	-	309	125	0	0	0	COG0223	NA	J	formyl transferase domain protein [Mycobacterium tusciae JS617] gi|373549827|gb|EHP76483.1| formyl transferase domain protein [Mycobacterium tusciae JS617]
M. shigaense_orf01464	1056759	1055311	-	482	72	0	0	0	NA	NA	NA	drug transporter [Mycobacterium parascrofulaceum ATCC BAA-614] gi|295898231|gb|EFG77805.1| drug transporter [Mycobacterium parascrofulaceum ATCC BAA-614]
M. shigaense_orf01465	1056962	1057582	+	206	106	0	0	0	COG1214	NA	O	hypothetical protein W7S_21265 [Mycobacterium sp. MOTT36Y] gi|386791083|gb|AFJ37202.1| hypothetical protein W7S_21265 [Mycobacterium sp. MOTT36Y]
M. shigaense_orf01466	1057579	1058049	+	156	89	0	0	0	COG0456	NA	R	ribosomal-protein-alanine acetyltransferase [Mycobacterium sp. MOTT36Y] gi|386791082|gb|AFJ37201.1| ribosomal-protein-alanine acetyltransferase [Mycobacterium sp. MOTT36Y]
M. shigaense_orf01467	1058046	1059086	+	346	72	0	0	1	COG0533	NA	O	UGMP family protein [Mycobacterium sp. MOTT36Y] gi|386791081|gb|AFJ37200.1| UGMP family protein [Mycobacterium sp. MOTT36Y]
M. shigaense_orf01468	1059327	1059629	+	100	1634	0	0	1	COG0234	NA	O	molecular chaperone GroES [Mycobacterium avium subsp. paratuberculosis K-10] gi|118465749|ref|YP_883501.1| co-chaperonin GroES [Mycobacterium avium 104] gi|254776796|ref|ZP_05218312.1| co-chaperonin GroES [Mycobacterium avium subsp. avium ATCC 25291] ...
M. shigaense_orf01470	1059714	1061336	+	540	276	0	0	1	COG0459	NA	O	molecular chaperone GroEL [Mycobacterium leprae TN] gi|221229588|ref|YP_002503004.1| molecular chaperone GroEL [Mycobacterium leprae Br4923] gi|584923|sp|P37578.1|CH601_MYCLE RecName: Full=60 kDa chaperonin 1; AltName: Full=GroEL protein 1; AltName: ...
M. shigaense_orf01472	1061768	1061953	+	61	202	0	0	0	NA	NA	NA	hypothetical protein MULP_02611 [Mycobacterium liflandii 128FXT] gi|442583273|gb|AGC62416.1| hypothetical protein MULP_02611 [Mycobacterium liflandii 128FXT]
M. shigaense_orf01474	1062756	1061956	-	266	127	0	0	0	NA	NA	NA	TetR family transcriptional regulator [Mycobacterium smegmatis str. MC2 155] gi|118173693|gb|ABK74589.1| transcriptional regulator, TetR family protein [Mycobacterium smegmatis str. MC2 155]
M. shigaense_orf01476	1062834	1064075	+	413	388	0	0	0	COG0654	NA	H,C	hypothetical protein MAP4271 [Mycobacterium avium subsp. paratuberculosis K-10] gi|41399203|gb|AAS06821.1| hypothetical protein MAP_4271 [Mycobacterium avium subsp. paratuberculosis K-10]
M. shigaense_orf01478	1064439	1064552	+	37	154	1	0	0	NA	NA	NA	NA
M. shigaense_orf01479	1065254	1064562	-	230	170	0	0	0	COG2860	NA	S	hypothetical protein Mmcs_0767 [Mycobacterium sp. MCS] gi|119866835|ref|YP_936787.1| hypothetical protein Mkms_0781 [Mycobacterium sp. KMS] gi|126433372|ref|YP_001069063.1| hypothetical protein Mjls_0761 [Mycobacterium sp. JLS] gi|108768165|gb|ABG068 ...
M. shigaense_orf01481	1065358	1066950	+	530	67	0	0	0	COG2114	NA	T	family 3 adenylate cyclase [Mycobacterium smegmatis JS623] gi|433295720|gb|AGB21540.1| family 3 adenylate cyclase [Mycobacterium smegmatis JS623]
M. shigaense_orf01483	1067957	1067319	-	212	71	0	0	0	COG2032	NA	P	superoxide dismutase, Cu-Zn [Mycobacterium intracellulare ATCC 13950] gi|378801308|gb|AFC45444.1| superoxide dismutase, Cu-Zn [Mycobacterium intracellulare ATCC 13950]
M. shigaense_orf01485	1068249	1068043	-	68	65	0	0	0	NA	NA	NA	OsmC family protein [Mycobacterium rhodesiae JS60] gi|353192864|gb|EHB58368.1| OsmC family protein [Mycobacterium rhodesiae JS60]
M. shigaense_orf01487	1068392	1068547	+	51	49	0	0	0	NA	NA	NA	cytochrome P450 [Mycobacterium tusciae JS617] gi|373553983|gb|EHP80570.1| cytochrome P450 [Mycobacterium tusciae JS617]
M. shigaense_orf01488	1068862	1068554	-	102	87	0	0	1	NA	NOG06562	K	WhiB-like regulatory protein, WhiB3 [Mycobacterium marinum M] gi|183174479|gb|ACC39589.1| WhiB-like regulatory protein, WhiB3 [Mycobacterium marinum M]
M. shigaense_orf01489	1069219	1070025	+	268	88	0	0	0	NA	NOG10723	NA	hypothetical protein ML0383 [Mycobacterium leprae TN] gi|221229590|ref|YP_002503006.1| hypothetical protein MLBr_00383 [Mycobacterium leprae Br4923] gi|13092660|emb|CAC29891.1| conserved hypothetical protein [Mycobacterium leprae] gi|219932697|emb|CA ...
M. shigaense_orf01490	1070184	1070684	+	166	364	0	0	0	COG1595	NA	K	RNA polymerase sigma factor SigD [Mycobacterium colombiense CECT 3035] gi|400330988|gb|EJO88485.1| RNA polymerase sigma factor SigD [Mycobacterium colombiense CECT 3035]
M. shigaense_orf01492	1070671	1071465	+	264	427	0	0	0	NA	NOG26194	NA	hypothetical protein MMAR_1135 [Mycobacterium marinum M] gi|183174482|gb|ACC39592.1| conserved hypothetical protein [Mycobacterium marinum M]
M. shigaense_orf01493	1071872	1071459	-	137	1206	0	0	1	NA	NOG07381	NA	hypothetical protein MintA_13792 [Mycobacterium intracellulare ATCC 13950] gi|379748935|ref|YP_005339756.1| hypothetical protein OCU_42160 [Mycobacterium intracellulare ATCC 13950] gi|379756235|ref|YP_005344907.1| hypothetical protein OCO_42230 [Myco ...
M. shigaense_orf01494	1072027	1073637	+	536	310	0	0	1	COG0516;COG0517	NA	R,F	inosine-5'-monophosphate dehydrogenase [Mycobacterium parascrofulaceum ATCC BAA-614] gi|295896545|gb|EFG76190.1| inosine-5'-monophosphate dehydrogenase [Mycobacterium parascrofulaceum ATCC BAA-614]
M. shigaense_orf01495	1073634	1074779	+	381	161	0	0	1	COG0516	NA	F	inosine-5'-monophosphate [Mycobacterium liflandii 128FXT] gi|442582124|gb|AGC61267.1| inosine-5'-monophosphate [Mycobacterium liflandii 128FXT]
M. shigaense_orf01496	1074832	1076571	+	579	127	0	0	1	COG2303	NA	E	FAD dependent oxidoreductase [Mycobacterium intracellulare ATCC 13950] gi|379748932|ref|YP_005339753.1| FAD dependent oxidoreductase [Mycobacterium intracellulare ATCC 13950] gi|379756232|ref|YP_005344904.1| FAD dependent oxidoreductase [Mycobacteriu ...
M. shigaense_orf01498	1077480	1076578	-	300	103	0	0	0	COG2175	NA	Q	alpha-ketoglutarate-dependent taurine dioxygenase [Mycobacterium colombiense CECT 3035] gi|400330981|gb|EJO88478.1| alpha-ketoglutarate-dependent taurine dioxygenase [Mycobacterium colombiense CECT 3035]
M. shigaense_orf01499	1077600	1078121	+	173	62	0	0	0	NA	NOG73426;NOG260232	K,S	TetR family transcriptional regulator [Mycobacterium parascrofulaceum ATCC BAA-614] gi|295896523|gb|EFG76169.1| TetR family transcriptional regulator [Mycobacterium parascrofulaceum ATCC BAA-614]
M. shigaense_orf01501	1081255	1080497	-	252	92	0	0	0	COG0637	NA	R	hydrolase [Mycobacterium marinum M] gi|443489632|ref|YP_007367779.1| hydrolase [Mycobacterium liflandii 128FXT] gi|183174491|gb|ACC39601.1| hydrolase [Mycobacterium marinum M] gi|442582129|gb|AGC61272.1| hydrolase [Mycobacterium liflandii 128FXT]
M. shigaense_orf01502	1080500	1078134	-	788	62	0	0	0	COG1554	NA	G	glycosyl hydrolase [Mycobacterium marinum M] gi|183174490|gb|ACC39600.1| glycosyl hydrolase [Mycobacterium marinum M]
M. shigaense_orf01503	1082144	1081338	-	268	64	0	0	0	NA	NA	NA	SAM-dependent methyltransferase [Mycobacterium parascrofulaceum ATCC BAA-614] gi|295896526|gb|EFG76172.1| SAM-dependent methyltransferase [Mycobacterium parascrofulaceum ATCC BAA-614]
M. shigaense_orf01504	1084482	1082974	-	502	82	0	0	0	COG0477	NA	P,R,E,G	integral membrane transport protein [Mycobacterium colombiense CECT 3035] gi|400330975|gb|EJO88472.1| integral membrane transport protein [Mycobacterium colombiense CECT 3035]
M. shigaense_orf01505	1082977	1082141	-	278	43	1	0	0	NA	NA	NA	methylase involved in ubiquinone/menaquinone biosynthesis [Mycobacterium colombiense CECT 3035] gi|400330976|gb|EJO88473.1| methylase involved in ubiquinone/menaquinone biosynthesis [Mycobacterium colombiense CECT 3035]
M. shigaense_orf01506	1084582	1085223	+	213	301	0	0	0	COG1733	NA	K	transcriptional regulatory protein [Mycobacterium parascrofulaceum ATCC BAA-614] gi|295896529|gb|EFG76175.1| transcriptional regulatory protein [Mycobacterium parascrofulaceum ATCC BAA-614]
M. shigaense_orf01507	1085233	1086813	+	526	154	0	0	1	COG0518;COG0519	NA	F	GMP synthase [Mycobacterium colombiense CECT 3035] gi|400330973|gb|EJO88470.1| GMP synthase [Mycobacterium colombiense CECT 3035]
M. shigaense_orf01509	1086992	1087678	+	228	93	0	0	0	NA	NOG15938	NA	hypothetical protein W7S_21080 [Mycobacterium sp. MOTT36Y] gi|443307358|ref|ZP_21037145.1| hypothetical protein W7U_16945 [Mycobacterium sp. H4Y] gi|386791046|gb|AFJ37165.1| hypothetical protein W7S_21080 [Mycobacterium sp. MOTT36Y] gi|442764726|gb|E ...
M. shigaense_orf01510	1087729	1089279	+	516	51	0	0	0	COG0389	NA	L	hypothetical protein MaviaA2_19206 [Mycobacterium avium subsp. avium ATCC 25291]
M. shigaense_orf01511	1090571	1089318	-	417	130	0	0	0	COG0304	NA	I,Q	3-oxoacyl-(acyl carrier protein) synthase II [Mycobacterium avium subsp. avium ATCC 25291]
M. shigaense_orf01512	1091667	1090642	-	341	76	0	1	0	COG1957	NA	F	pyrimidine-specific ribonucleoside hydrolase rihA [Mycobacterium indicus pranii MTCC 9506] gi|405131009|gb|AFS16264.1| Pyrimidine-specific ribonucleoside hydrolase rihA [Mycobacterium indicus pranii MTCC 9506]
M. shigaense_orf01514	1092117	1091689	-	142	112	1	0	0	NA	NA	NA	lyase [Streptomyces avermitilis MA-4680] gi|29605166|dbj|BAC69233.1| putative lyase [Streptomyces avermitilis MA-4680]
M. shigaense_orf01516	1094854	1094150	-	234	117	0	0	0	COG0406	NA	G	LpqD family protein [Mycobacterium parascrofulaceum ATCC BAA-614] gi|295896513|gb|EFG76160.1| LpqD family protein [Mycobacterium parascrofulaceum ATCC BAA-614]
M. shigaense_orf01517	1094051	1092132	-	639	107	0	0	0	COG1028;COG3320	NA	I,Q,R	short chain dehydrogenase [Mycobacterium avium 104] gi|118167525|gb|ABK68422.1| short chain dehydrogenase [Mycobacterium avium 104]
M. shigaense_orf01518	1094944	1095819	+	291	98	0	0	0	COG2030	NA	I	MaoC family protein [Mycobacterium parascrofulaceum ATCC BAA-614] gi|295895972|gb|EFG75662.1| MaoC family protein [Mycobacterium parascrofulaceum ATCC BAA-614]
M. shigaense_orf01520	1096952	1095816	-	378	65	0	0	0	COG1877	NA	G	Trehalose-phosphate phosphatase [Mycobacterium canettii CIPT 140070008] gi|432160115|emb|CCK57434.1| Trehalose-phosphate phosphatase [Mycobacterium canettii CIPT 140070008]
M. shigaense_orf01521	1098249	1096918	-	443	93	0	0	0	NA	NOG09285	S	hypothetical protein Mb3406 [Mycobacterium bovis AF2122/97] gi|121639298|ref|YP_979522.1| hypothetical protein BCG_3443 [Mycobacterium bovis BCG str. Pasteur 1173P2] gi|224991795|ref|YP_002646484.1| hypothetical protein JTY_3443 [Mycobacterium bovis ...
M. shigaense_orf01522	1098543	1098400	-	47	38	1	0	0	NA	NA	NA	NA
M. shigaense_orf01523	1098511	1101759	+	1082	55	0	0	0	COG0587	NA	L	error-prone DNA polymerase [Mycobacterium colombiense CECT 3035] gi|400330960|gb|EJO88457.1| error-prone DNA polymerase [Mycobacterium colombiense CECT 3035]
M. shigaense_orf01525	1101853	1102188	+	111	177	0	0	0	NA	NOG68946	NA	putative secreted protein [Mycobacterium liflandii 128FXT] gi|442584545|gb|AGC63688.1| putative secreted protein [Mycobacterium liflandii 128FXT]
M. shigaense_orf01526	1102623	1102207	-	138	128	0	0	0	NA	NOG81456	R	Conserved protein of unknown function [Mycobacterium canettii CIPT 140070010] gi|432164063|emb|CCK61497.1| Conserved protein of unknown function [Mycobacterium canettii CIPT 140070010]
M. shigaense_orf01527	1102647	1103291	+	214	141	0	0	0	COG0778	NA	C	nitroreductase [Mycobacterium liflandii 128FXT] gi|442582145|gb|AGC61288.1| nitroreductase [Mycobacterium liflandii 128FXT]
M. shigaense_orf01528	1103787	1103323	-	154	80	0	0	1	COG0219	NA	J	SpoU rRNA methylase [Mycobacterium parascrofulaceum ATCC BAA-614] gi|295896519|gb|EFG76166.1| SpoU rRNA methylase [Mycobacterium parascrofulaceum ATCC BAA-614]
M. shigaense_orf01530	1104253	1103804	-	149	58	1	0	0	COG2059	NA	P	Chromate transporter [Mycobacterium rhodesiae JS60] gi|353178776|gb|EHB44345.1| Chromate transporter [Mycobacterium rhodesiae JS60]
M. shigaense_orf01532	1105238	1104246	-	330	62	1	0	0	NA	NA	NA	phosphatidylserine/phosphatidylglycerophosphate/cardiolipin synthase [Mycobacterium smegmatis JS623] gi|433299800|gb|AGB25620.1| phosphatidylserine/phosphatidylglycerophosphate/cardiolipin synthase [Mycobacterium smegmatis JS623]
M. shigaense_orf01535	1105313	1105609	+	98	61	1	0	0	NA	NA	NA	NA
M. shigaense_orf01538	1105746	1108442	+	898	66	0	0	0	NA	NOG294106;NOG256713	S	hypothetical protein MCOL_V216029 [Mycobacterium colombiense CECT 3035] gi|400330955|gb|EJO88452.1| hypothetical protein MCOL_V216029 [Mycobacterium colombiense CECT 3035]
M. shigaense_orf01539	1108450	1108854	+	134	95	0	0	0	COG2018	NA	R	roadblock/LC7 domain-contain protein [Mycobacterium intracellulare ATCC 13950] gi|379748905|ref|YP_005339726.1| roadblock/LC7 domain protein [Mycobacterium intracellulare ATCC 13950] gi|379756207|ref|YP_005344879.1| roadblock/LC7 domain protein [Myco ...
M. shigaense_orf01540	1108906	1109235	+	109	78	0	0	0	NA	NOG40924	NA	hypothetical protein MCOL_V216019 [Mycobacterium colombiense CECT 3035] gi|400330953|gb|EJO88450.1| hypothetical protein MCOL_V216019 [Mycobacterium colombiense CECT 3035]
M. shigaense_orf01542	1109216	1109788	+	190	114	0	0	0	COG2229	NA	R	ATP/GTP-binding protein [Mycobacterium colombiense CECT 3035] gi|400330952|gb|EJO88449.1| ATP/GTP-binding protein [Mycobacterium colombiense CECT 3035]
M. shigaense_orf01543	1109794	1110351	+	185	76	0	0	0	COG1357	NA	S	Conserved protein of unknown function [Mycobacterium canettii CIPT 140070008] gi|432160104|emb|CCK57423.1| Conserved protein of unknown function [Mycobacterium canettii CIPT 140070008]
M. shigaense_orf01546	1112885	1110354	-	843	66	0	0	0	COG0842;COG1131;COG1716	NA	T,V	transmembrane ABC transporter ATP-binding protein [Mycobacterium marinum M] gi|183174521|gb|ACC39631.1| conserved transmembrane ATP-binding protein ABC transporter [Mycobacterium marinum M]
M. shigaense_orf01548	1115518	1112858	-	886	100	0	0	0	COG0842;COG1131;COG1716	NA	T,V	transmembrane ABC transporter ATP-binding protein [Mycobacterium marinum M] gi|183174522|gb|ACC39632.1| conserved transmembrane ATP-binding protein ABC transporter [Mycobacterium marinum M]
M. shigaense_orf01549	1116760	1115543	-	405	63	0	0	0	COG1902	NA	C	oxidoreductase, FAD/FMN-binding superfamily protein [Mycobacterium colombiense CECT 3035] gi|400330948|gb|EJO88445.1| oxidoreductase, FAD/FMN-binding superfamily protein [Mycobacterium colombiense CECT 3035]
M. shigaense_orf01550	1116912	1117757	+	281	122	0	0	1	COG0190	NA	H	tetrahydrofolate dehydrogenase/cyclohydrolase NAD(P)-binding domain-containing protein [Mycobacterium intracellulare MOTT-02] gi|387877562|ref|YP_006307866.1| bifunctional 5,10-methylene-tetrahydrofolate dehydrogenase/ 5,10-methylene-tetrahydrofolate ...
M. shigaense_orf01551	1117754	1118038	+	94	95	0	0	0	NA	NOG70220	NA	conserved hypothetical protein [Mycobacterium parascrofulaceum ATCC BAA-614] gi|295896495|gb|EFG76144.1| conserved hypothetical protein [Mycobacterium parascrofulaceum ATCC BAA-614]
M. shigaense_orf01553	1118628	1118035	-	197	84	0	0	0	NA	NOG12914	NA	hypothetical protein OCO_41860 [Mycobacterium intracellulare MOTT-02] gi|378806414|gb|AFC50549.1| hypothetical protein OCO_41860 [Mycobacterium intracellulare MOTT-02]
M. shigaense_orf01554	1118889	1120373	+	494	73	0	0	0	COG0277	NA	C	oxidoreductase [Mycobacterium colombiense CECT 3035] gi|400330944|gb|EJO88441.1| oxidoreductase [Mycobacterium colombiense CECT 3035]
M. shigaense_orf01555	1121752	1120379	-	457	65	0	0	0	COG5651	NA	N	PPE family protein [Mycobacterium xenopi RIVM700367] gi|383331684|gb|EID10180.1| PPE family protein [Mycobacterium xenopi RIVM700367]
M. shigaense_orf01556	1123207	1121816	-	463	47	0	0	0	COG5651	NA	N	PPE family protein [Mycobacterium parascrofulaceum ATCC BAA-614] gi|295899645|gb|EFG79096.1| PPE family protein [Mycobacterium parascrofulaceum ATCC BAA-614]
M. shigaense_orf01558	1124987	1123218	-	589	45	0	0	0	COG1226	NA	P	TrkA domain-containing protein [Mycobacterium xenopi RIVM700367] gi|383332852|gb|EID11323.1| TrkA domain-containing protein [Mycobacterium xenopi RIVM700367]
M. shigaense_orf01560	1125569	1127434	+	621	58	0	1	0	COG0531	NA	E	OB-fold nucleic acid binding domain-containing protein [Mycobacterium xenopi RIVM700367] gi|383333038|gb|EID11496.1| OB-fold nucleic acid binding domain-containing protein [Mycobacterium xenopi RIVM700367]
M. shigaense_orf01561	1127449	1129440	+	663	51	0	0	0	COG0531	NA	E	OB-fold nucleic acid binding domain-containing protein [Mycobacterium xenopi RIVM700367] gi|383333038|gb|EID11496.1| OB-fold nucleic acid binding domain-containing protein [Mycobacterium xenopi RIVM700367]
M. shigaense_orf01562	1129444	1129629	+	61	62	0	0	0	NA	NA	NA	hypothetical protein MCOL_V215234 [Mycobacterium colombiense CECT 3035] gi|400330796|gb|EJO88293.1| hypothetical protein MCOL_V215234 [Mycobacterium colombiense CECT 3035]
M. shigaense_orf01563	1130378	1129653	-	241	68	1	0	0	NA	NA	NA	ubiquinone/menaquinone biosynthesis methyltransferase ubiE [Marinobacter sp. BSs20148] gi|399161831|gb|AFP32394.1| Ubiquinone/menaquinone biosynthesis methyltransferase ubiE [Marinobacter sp. BSs20148]
M. shigaense_orf01564	1131206	1130463	-	247	123	0	0	0	COG0500	NA	Q,R	probable methyltransferase [Mycobacterium parascrofulaceum ATCC BAA-614] gi|295896457|gb|EFG76107.1| probable methyltransferase [Mycobacterium parascrofulaceum ATCC BAA-614]
M. shigaense_orf01565	1132345	1131194	-	383	108	0	0	1	COG2021	NA	E	Homoserine O-acetyltransferase [Mycobacterium canettii CIPT 140070017] gi|432168039|emb|CCK65561.1| Homoserine O-acetyltransferase [Mycobacterium canettii CIPT 140070017]
M. shigaense_orf01568	1133725	1132367	-	452	105	0	0	0	COG2873	NA	E	O-acetylhomoserine aminocarboxypropyltransferase [Mycobacterium colombiense CECT 3035] gi|400330939|gb|EJO88436.1| O-acetylhomoserine aminocarboxypropyltransferase [Mycobacterium colombiense CECT 3035]
M. shigaense_orf01570	1134010	1136247	+	745	118	0	0	1	COG2838	NA	C	isocitrate dehydrogenase [Mycobacterium colombiense CECT 3035] gi|400330938|gb|EJO88435.1| isocitrate dehydrogenase [Mycobacterium colombiense CECT 3035]
M. shigaense_orf01572	1136249	1137475	+	408	78	0	0	0	COG0538	NA	C	isocitrate dehydrogenase [Mycobacterium parascrofulaceum ATCC BAA-614] gi|295896462|gb|EFG76112.1| isocitrate dehydrogenase [Mycobacterium parascrofulaceum ATCC BAA-614]
M. shigaense_orf01573	1138301	1137492	-	269	141	0	0	0	COG0596	NA	R	hypothetical protein MCAN_33651 [Mycobacterium canettii CIPT 140010059] gi|433628482|ref|YP_007262111.1| Conserved protein of unknown function [Mycobacterium canettii CIPT 140060008] gi|433632442|ref|YP_007266070.1| Conserved protein of unknown funct ...
M. shigaense_orf01574	1138548	1139468	+	306	72	0	0	1	COG0180	NA	J	tryptophanyl-tRNA synthetase [Mycobacterium intracellulare ATCC 13950] gi|379763740|ref|YP_005350137.1| tryptophanyl-tRNA synthetase [Mycobacterium intracellulare MOTT-64] gi|406032433|ref|YP_006731325.1| tryptophanyl-tRNA synthetase [Mycobacterium i ...
M. shigaense_orf01576	1139495	1140523	+	342	56	0	1	0	COG1295	NA	S	hypothetical protein MCOL_V215924 [Mycobacterium colombiense CECT 3035] gi|400330934|gb|EJO88431.1| hypothetical protein MCOL_V215924 [Mycobacterium colombiense CECT 3035]
M. shigaense_orf01578	1141674	1140520	-	384	62	0	0	0	COG1820	NA	G	N-acetylglucosamine-6-phosphate deacetylase [Mycobacterium parascrofulaceum ATCC BAA-614] gi|295896466|gb|EFG76116.1| N-acetylglucosamine-6-phosphate deacetylase [Mycobacterium parascrofulaceum ATCC BAA-614]
M. shigaense_orf01580	1142996	1141665	-	443	103	0	0	0	COG0477	NA	P,R,E,G	sugar-transport integral membrane protein SugI [Mycobacterium ulcerans Agy99] gi|118569225|gb|ABL03976.1| sugar-transport integral membrane protein SugI [Mycobacterium ulcerans Agy99]
M. shigaense_orf01583	1147242	1144369	-	957	58	0	0	0	COG2409	NA	R	Conserved membrane protein of unknown function, MmpL2, possible transport protein [Mycobacterium canettii CIPT 140070010] gi|432161187|emb|CCK58522.1| Conserved membrane protein of unknown function, MmpL2, possible transport protein [Mycobacterium ca ...
M. shigaense_orf01584	1147676	1147239	-	145	109	0	0	0	NA	NOG127055	NA	MmpS-family membrane protein [Mycobacterium marinum M] gi|443489266|ref|YP_007367413.1| conserved membrane protein MmpS-family [Mycobacterium liflandii 128FXT] gi|183174190|gb|ACC39300.1| conserved membrane protein MmpS-family [Mycobacterium marinum ...
M. shigaense_orf01586	1148984	1147800	-	394	75	0	0	0	COG1686	NA	M	hypothetical protein MAP3448 [Mycobacterium avium subsp. paratuberculosis K-10] gi|417748809|ref|ZP_12397223.1| D-alanyl-D-alanine carboxypeptidase [Mycobacterium avium subsp. paratuberculosis S397] gi|440778930|ref|ZP_20957674.1| D-alanyl-D-alanine ...
M. shigaense_orf01587	1149168	1149443	+	91	141	0	0	0	NA	NA	NA	hypothetical protein W7S_20815 [Mycobacterium sp. MOTT36Y] gi|443307315|ref|ZP_21037102.1| hypothetical protein W7U_16730 [Mycobacterium sp. H4Y] gi|386790993|gb|AFJ37112.1| hypothetical protein W7S_20815 [Mycobacterium sp. MOTT36Y] gi|442764683|gb|E ...
M. shigaense_orf01588	1150444	1149440	-	334	63	0	0	0	COG3386	NA	G	strictosidine synthase [Mycobacterium colombiense CECT 3035] gi|400330928|gb|EJO88425.1| strictosidine synthase [Mycobacterium colombiense CECT 3035]
M. shigaense_orf01590	1151785	1150454	-	443	56	0	0	0	COG0161	NA	H	hypothetical protein OCU_41610 [Mycobacterium intracellulare ATCC 13950] gi|379756182|ref|YP_005344854.1| hypothetical protein OCO_41700 [Mycobacterium intracellulare MOTT-02] gi|378801244|gb|AFC45380.1| hypothetical protein OCU_41610 [Mycobacterium ...
M. shigaense_orf01591	1151821	1152729	+	302	67	0	0	0	COG1595	NA	K	RNA polymerase sigma factor SigJ [Mycobacterium colombiense CECT 3035] gi|400330926|gb|EJO88423.1| RNA polymerase sigma factor SigJ [Mycobacterium colombiense CECT 3035]
M. shigaense_orf01593	1153318	1152701	-	205	54	0	0	0	COG2128	NA	S	transposase [Mycobacterium colombiense CECT 3035] gi|400330925|gb|EJO88422.1| transposase [Mycobacterium colombiense CECT 3035]
M. shigaense_orf01594	1153406	1153843	+	145	45	0	0	0	NA	NA	NA	hypothetical protein MMAR_1198 [Mycobacterium marinum M] gi|183174546|gb|ACC39656.1| conserved hypothetical protein [Mycobacterium marinum M]
M. shigaense_orf01595	1153918	1156455	+	845	60	0	0	0	NA	NA	NA	possible non-specific serine/threonine protein kinase [Mycobacterium parascrofulaceum ATCC BAA-614] gi|295896474|gb|EFG76124.1| possible non-specific serine/threonine protein kinase [Mycobacterium parascrofulaceum ATCC BAA-614]
M. shigaense_orf01596	1157243	1156452	-	263	65	0	0	1	COG0479	NA	C	succinate dehydrogenase iron-sulfur subunit [Mycobacterium intracellulare ATCC 13950] gi|379756178|ref|YP_005344850.1| succinate dehydrogenase iron-sulfur subunit [Mycobacterium intracellulare MOTT-02] gi|443307310|ref|ZP_21037097.1| succinate dehydr ...
M. shigaense_orf01597	1159015	1157243	-	590	57	0	0	1	COG1053	NA	C	Probable succinate dehydrogenase (flavoprotein subunit) SdhA (succinic dehydrogenase) (fumarate reductase) (fumarate dehydrogenase) (fumaric hydrogenase) [Mycobacterium tuberculosis H37Rv] gi|15842910|ref|NP_337947.1| succinate dehydrogenase flavopro ...
M. shigaense_orf01599	1159502	1159035	-	155	75	0	0	1	COG2142	NA	C	succinate dehydrogenase cytochrome b small subunit [Mycobacterium parascrofulaceum ATCC BAA-614] gi|295896477|gb|EFG76127.1| succinate dehydrogenase cytochrome b small subunit [Mycobacterium parascrofulaceum ATCC BAA-614]
M. shigaense_orf01600	1159837	1159499	-	112	77	0	0	1	COG2009	NA	C	hypothetical protein W7U_16690 [Mycobacterium sp. H4Y] gi|442764675|gb|ELR82673.1| hypothetical protein W7U_16690 [Mycobacterium sp. H4Y]
M. shigaense_orf01601	1160087	1160467	+	126	81	0	0	0	COG0295	NA	F	cytidine deaminase [Mycobacterium colombiense CECT 3035] gi|400330920|gb|EJO88417.1| cytidine deaminase [Mycobacterium colombiense CECT 3035]
M. shigaense_orf01603	1160464	1161777	+	437	108	0	0	0	COG0213	NA	F	Probable thymidine phosphorylase DeoA (tdrpase) (pyrimidine phosphorylase) [Mycobacterium tuberculosis H37Rv] gi|15842906|ref|NP_337943.1| thymidine phosphorylase [Mycobacterium tuberculosis CDC1551] gi|148663178|ref|YP_001284701.1| thymidine phospho ...
M. shigaense_orf01606	1161774	1162862	+	362	54	0	0	0	COG1816	NA	F	adenosine deaminase [Mycobacterium intracellulare ATCC 13950] gi|379748870|ref|YP_005339691.1| adenosine deaminase [Mycobacterium intracellulare ATCC 13950] gi|379756172|ref|YP_005344844.1| adenosine deaminase [Mycobacterium intracellulare MOTT-02] g ...
M. shigaense_orf01608	1162915	1163280	+	121	44	1	0	0	NA	NA	NA	hypothetical protein MintA_17622 [Mycobacterium intracellulare ATCC 13950] gi|379748182|ref|YP_005339003.1| hypothetical protein OCU_34630 [Mycobacterium intracellulare ATCC 13950] gi|379755470|ref|YP_005344142.1| hypothetical protein OCO_34580 [Myco ...
M. shigaense_orf01609	1163460	1163750	+	96	55	0	0	0	NA	NA	NA	conserved hypothetical protein [Mycobacterium parascrofulaceum ATCC BAA-614] gi|295898112|gb|EFG77687.1| conserved hypothetical protein [Mycobacterium parascrofulaceum ATCC BAA-614]
M. shigaense_orf01611	1164393	1163938	-	151	58	0	0	0	NA	NA	NA	hypothetical protein Mycsm_00895 [Mycobacterium smegmatis JS623] gi|433295505|gb|AGB21325.1| hypothetical protein Mycsm_00895 [Mycobacterium smegmatis JS623]
M. shigaense_orf01612	1164542	1164907	+	121	70	1	0	0	NA	NA	NA	NA
M. shigaense_orf01614	1165820	1165137	-	227	75	0	0	0	COG1802	NA	K	GntR family transcriptional regulator [Mycobacterium colombiense CECT 3035] gi|400330916|gb|EJO88413.1| GntR family transcriptional regulator [Mycobacterium colombiense CECT 3035]
M. shigaense_orf01615	1165949	1166959	+	336	182	0	0	0	NA	NA	NA	conserved hypothetical protein [Mycobacterium parascrofulaceum ATCC BAA-614] gi|295896484|gb|EFG76134.1| conserved hypothetical protein [Mycobacterium parascrofulaceum ATCC BAA-614]
M. shigaense_orf01616	1167001	1168020	+	339	154	0	1	0	COG2304	NA	R	hypothetical protein MintA_09911 [Mycobacterium intracellulare ATCC 13950] gi|379748866|ref|YP_005339687.1| hypothetical protein OCU_41470 [Mycobacterium intracellulare ATCC 13950] gi|379756168|ref|YP_005344840.1| hypothetical protein OCO_41560 [Myco ...
M. shigaense_orf01617	1169034	1168051	-	327	103	0	1	0	COG2304	NA	R	hypothetical protein MCOL_V215819 [Mycobacterium colombiense CECT 3035] gi|400330913|gb|EJO88410.1| hypothetical protein MCOL_V215819 [Mycobacterium colombiense CECT 3035]
M. shigaense_orf01619	1170372	1169077	-	431	100	0	0	0	NA	NOG05186	S	conserved hypothetical protein [Mycobacterium parascrofulaceum ATCC BAA-614] gi|295896487|gb|EFG76137.1| conserved hypothetical protein [Mycobacterium parascrofulaceum ATCC BAA-614]
M. shigaense_orf01621	1171265	1170417	-	282	95	0	0	0	NA	NOG11964	R	hypothetical protein MCOL_V215809 [Mycobacterium colombiense CECT 3035] gi|400330911|gb|EJO88408.1| hypothetical protein MCOL_V215809 [Mycobacterium colombiense CECT 3035]
M. shigaense_orf01623	1173632	1172037	-	531	55	0	0	0	COG1109	NA	G	phospho manno mutase [Mycobacterium indicus pranii MTCC 9506] gi|405130956|gb|AFS16211.1| putative phospho manno mutase [Mycobacterium indicus pranii MTCC 9506]
M. shigaense_orf01625	1174443	1173637	-	268	63	0	0	1	COG0005	NA	F	purine nucleoside phosphorylase [Mycobacterium intracellulare MOTT-64] gi|406032408|ref|YP_006731300.1| Purine nucleoside phosphorylase [Mycobacterium indicus pranii MTCC 9506] gi|378811656|gb|AFC55790.1| purine nucleoside phosphorylase [Mycobacteriu ...
M. shigaense_orf01626	1174485	1175147	+	220	97	0	1	0	NA	NA	NA	cutinase family serine esterase [Mycobacterium parascrofulaceum ATCC BAA-614] gi|295896443|gb|EFG76094.1| cutinase family serine esterase [Mycobacterium parascrofulaceum ATCC BAA-614]
M. shigaense_orf01628	1175197	1176381	+	394	95	0	0	0	COG1473	NA	R	ama/HipO/HyuC family hydrolase [Mycobacterium parascrofulaceum ATCC BAA-614] gi|295896444|gb|EFG76095.1| ama/HipO/HyuC family hydrolase [Mycobacterium parascrofulaceum ATCC BAA-614]
M. shigaense_orf01630	1176378	1177556	+	392	83	0	0	0	COG1473	NA	R	putative N-acyl-L-amino acid amidohydrolase AMIA1 (N-acyl-L-amino acid aminohydrolase) [Mycobacterium canettii CIPT 140010059] gi|433628447|ref|YP_007262076.1| Putative N-acyl-L-amino acid amidohydrolase AmiA1 (N-acyl-L-amino acid aminohydrolase) [My ...
M. shigaense_orf01631	1178032	1177553	-	159	127	0	0	0	NA	NOG87076	S	hypothetical protein MintA_09856 [Mycobacterium intracellulare ATCC 13950] gi|379748856|ref|YP_005339677.1| hypothetical protein OCU_41370 [Mycobacterium intracellulare ATCC 13950] gi|379756158|ref|YP_005344830.1| hypothetical protein OCO_41460 [Myco ...
M. shigaense_orf01634	1178108	1179514	+	468	65	0	0	0	COG1249	NA	C	flavoprotein disulfide reductase [Mycobacterium marinum M] gi|183174572|gb|ACC39682.1| dihydrolipoamide dehydrogenase LpdA [Mycobacterium marinum M]
M. shigaense_orf01636	1179525	1181249	+	574	119	0	0	1	COG0578	NA	C	glycerol-3-phosphate dehydrogenase GlpD2 [Mycobacterium ulcerans Agy99] gi|118570237|gb|ABL04988.1| glycerol-3-phosphate dehydrogenase GlpD2 [Mycobacterium ulcerans Agy99]
M. shigaense_orf01639	1184398	1181948	-	816	65	0	0	0	COG2217	NA	P	cadmium-transporting ATPase [Mycobacterium parascrofulaceum ATCC BAA-614] gi|295896435|gb|EFG76087.1| cadmium-transporting ATPase [Mycobacterium parascrofulaceum ATCC BAA-614]
M. shigaense_orf01641	1184540	1184965	+	141	145	0	0	0	COG0517	NA	R	signal-transduction protein [Mycobacterium parascrofulaceum ATCC BAA-614] gi|295896436|gb|EFG76088.1| signal-transduction protein [Mycobacterium parascrofulaceum ATCC BAA-614]
M. shigaense_orf01643	1184977	1186518	+	513	68	0	0	0	COG0069	NA	E	glutamate synthase, GltB_1 [Mycobacterium liflandii 128FXT] gi|442582209|gb|AGC61352.1| glutamate synthase, GltB_1 [Mycobacterium liflandii 128FXT]
M. shigaense_orf01645	1187100	1186477	-	207	70	0	0	0	NA	NOG39311	NA	conserved hypothetical protein [Mycobacterium parascrofulaceum ATCC BAA-614] gi|295896438|gb|EFG76090.1| conserved hypothetical protein [Mycobacterium parascrofulaceum ATCC BAA-614]
M. shigaense_orf01646	1187267	1187932	+	221	90	0	0	0	COG0704	NA	P	Probable phosphate-transport system transcriptional regulatory protein PhoU homolog 1 PhoY1 [Mycobacterium tuberculosis H37Rv] gi|15842892|ref|NP_337929.1| phosphate transport system regulator PhoU-like protein [Mycobacterium tuberculosis CDC1551] gi ...
M. shigaense_orf01650	1187957	1190584	+	875	66	0	0	0	COG0474	NA	P	magnesium-translocating P-type ATPase [Mycobacterium chubuense NBB4] gi|390615869|gb|AFM17019.1| magnesium-translocating P-type ATPase [Mycobacterium chubuense NBB4]
M. shigaense_orf01651	1190967	1190575	-	130	213	0	0	0	NA	NA	NA	hypothetical protein MXEN_02279 [Mycobacterium xenopi RIVM700367] gi|383338605|gb|EID16968.1| hypothetical protein MXEN_02279 [Mycobacterium xenopi RIVM700367]
M. shigaense_orf01653	1191170	1192093	+	307	69	0	0	0	COG3509	NA	Q	lpqC [Mycobacterium sp. MOTT36Y] gi|443307279|ref|ZP_21037066.1| lpqC [Mycobacterium sp. H4Y] gi|386790957|gb|AFJ37076.1| lpqC [Mycobacterium sp. MOTT36Y] gi|442764647|gb|ELR82645.1| lpqC [Mycobacterium sp. H4Y]
M. shigaense_orf01654	1192864	1192097	-	255	53	0	0	0	COG0266	NA	L	hypothetical protein MaviaA2_18836 [Mycobacterium avium subsp. avium ATCC 25291]
M. shigaense_orf01660	1197443	1192875	-	1522	85	0	0	0	COG1201	NA	R	DEAD/DEAH box helicase [Mycobacterium parascrofulaceum ATCC BAA-614] gi|295896376|gb|EFG76029.1| DEAD/DEAH box helicase [Mycobacterium parascrofulaceum ATCC BAA-614]
M. shigaense_orf01661	1198020	1197493	-	175	209	0	0	0	COG1309	NA	K	hypothetical protein MCOL_V215694 [Mycobacterium colombiense CECT 3035] gi|400330888|gb|EJO88385.1| hypothetical protein MCOL_V215694 [Mycobacterium colombiense CECT 3035]
M. shigaense_orf01662	1198488	1198871	+	127	99	0	0	0	NA	NOG40310	NA	hypothetical protein MAP3409c [Mycobacterium avium subsp. paratuberculosis K-10] gi|254776696|ref|ZP_05218212.1| hypothetical protein MaviaA2_18796 [Mycobacterium avium subsp. avium ATCC 25291] gi|417748851|ref|ZP_12397265.1| hypothetical protein MAP ...
M. shigaense_orf01663	1199189	1199302	+	37	61	1	0	0	NA	NA	NA	NA
M. shigaense_orf01664	1199331	1199768	+	145	136	0	0	0	COG2172	NA	T	RsbW protein [Mycobacterium colombiense CECT 3035] gi|400330881|gb|EJO88378.1| RsbW protein [Mycobacterium colombiense CECT 3035]
M. shigaense_orf01666	1199765	1200559	+	264	231	0	0	0	COG1191	NA	K	RNA polymerase sigma factor SigF [Mycobacterium avium subsp. paratuberculosis K-10] gi|254776692|ref|ZP_05218208.1| RNA polymerase sigma factor SigF [Mycobacterium avium subsp. avium ATCC 25291] gi|440778884|ref|ZP_20957629.1| RNA polymerase sigma fa ...
M. shigaense_orf01667	1200949	1200539	-	136	902	0	0	0	NA	NA	NA	hypothetical protein W7S_20570 [Mycobacterium sp. MOTT36Y] gi|443307266|ref|ZP_21037053.1| hypothetical protein W7U_16485 [Mycobacterium sp. H4Y] gi|386790944|gb|AFJ37063.1| hypothetical protein W7S_20570 [Mycobacterium sp. MOTT36Y] gi|442764634|gb|E ...
M. shigaense_orf01670	1202941	1201142	-	599	179	0	0	1	COG4770	NA	I	accA3 [Mycobacterium colombiense CECT 3035] gi|400330878|gb|EJO88375.1| accA3 [Mycobacterium colombiense CECT 3035]
M. shigaense_orf01672	1203487	1203065	-	140	117	0	0	0	COG2166	NA	R	SufE protein [Mycobacterium parascrofulaceum ATCC BAA-614] gi|295896385|gb|EFG76038.1| SufE protein [Mycobacterium parascrofulaceum ATCC BAA-614]
M. shigaense_orf01673	1204388	1203498	-	296	228	0	0	1	COG2897	NA	P	thiosulfate sulfurtransferase [Mycobacterium colombiense CECT 3035] gi|400330876|gb|EJO88373.1| thiosulfate sulfurtransferase [Mycobacterium colombiense CECT 3035]
M. shigaense_orf01674	1205051	1204407	-	214	92	0	0	0	COG0424	NA	D	Maf-like protein [Mycobacterium marinum M] gi|226696301|sp|B2HEK5.1|Y1254_MYCMM RecName: Full=Maf-like protein MMAR_1254 gi|183174602|gb|ACC39712.1| nucleotide-binding protein [Mycobacterium marinum M]
M. shigaense_orf01675	1205287	1205048	-	79	203	0	0	0	NA	NOG14431;NOG221321	S	hypothetical protein MintA_06319 [Mycobacterium intracellulare ATCC 13950]
M. shigaense_orf01677	1207024	1208559	+	511	66	0	0	0	COG1053	NA	C	3-ketosteroid-delta-1-dehydrogenase [Mycobacterium parascrofulaceum ATCC BAA-614] gi|295896390|gb|EFG76043.1| 3-ketosteroid-delta-1-dehydrogenase [Mycobacterium parascrofulaceum ATCC BAA-614]
M. shigaense_orf01678	1206951	1205311	-	546	170	0	0	1	COG4799	NA	I	AccD5 [Mycobacterium avium subsp. paratuberculosis K-10] gi|118463411|ref|YP_883391.1| propionyl-CoA carboxylase beta chain [Mycobacterium avium 104] gi|417748862|ref|ZP_12397276.1| acetyl-CoA carboxylase, carboxyltransferase component (subunits alph ...
M. shigaense_orf01680	1208556	1209377	+	273	58	0	0	0	COG0340	NA	H	biotin-[acetyl-CoA-carboxylase] ligase [Mycobacterium intracellulare ATCC 13950] gi|379756124|ref|YP_005344796.1| biotin-[acetyl-CoA-carboxylase] ligase [Mycobacterium intracellulare MOTT-02] gi|378801186|gb|AFC45322.1| biotin-[acetyl-CoA-carboxylase ...
M. shigaense_orf01681	1209388	1209906	+	172	110	0	0	1	NA	NOG10537	S	hypothetical protein MCOL_V215604 [Mycobacterium colombiense CECT 3035] gi|400330870|gb|EJO88367.1| hypothetical protein MCOL_V215604 [Mycobacterium colombiense CECT 3035]
M. shigaense_orf01682	1210541	1209861	-	226	160	0	0	0	COG2246	NA	S	Probable conserved transmembrane protein [Mycobacterium tuberculosis H37Rv] gi|148663140|ref|YP_001284663.1| transmembrane protein [Mycobacterium tuberculosis H37Ra] gi|148824478|ref|YP_001289233.1| transmembrane protein [Mycobacterium tuberculosis F ...
M. shigaense_orf01683	1210681	1211892	+	403	81	0	0	1	COG0026	NA	F	phosphoribosylaminoimidazole carboxylase ATPase subunit [Mycobacterium intracellulare ATCC 13950] gi|378801183|gb|AFC45319.1| phosphoribosylaminoimidazole carboxylase ATPase subunit [Mycobacterium intracellulare ATCC 13950]
M. shigaense_orf01684	1211922	1212413	+	163	104	0	0	1	COG0041	NA	F	phosphoribosylaminoimidazole carboxylase catalytic subunit PurE [Mycobacterium parascrofulaceum ATCC BAA-614] gi|295896395|gb|EFG76048.1| phosphoribosylaminoimidazole carboxylase catalytic subunit PurE [Mycobacterium parascrofulaceum ATCC BAA-614]
M. shigaense_orf01685	1212438	1213607	+	389	213	0	0	1	COG1960	NA	I	Butyryl-CoA dehydrogenase [Mycobacterium rhodesiae JS60] gi|353193066|gb|EHB58570.1| Butyryl-CoA dehydrogenase [Mycobacterium rhodesiae JS60]
M. shigaense_orf01687	1213697	1214905	+	402	103	0	0	0	COG0784	NA	T	magnesium or manganese-dependent protein phosphatase [Mycobacterium parascrofulaceum ATCC BAA-614] gi|295896397|gb|EFG76050.1| magnesium or manganese-dependent protein phosphatase [Mycobacterium parascrofulaceum ATCC BAA-614]
M. shigaense_orf01689	1214905	1216500	+	531	67	0	0	0	COG0642	NA	T	two-component sensor protein [Mycobacterium colombiense CECT 3035] gi|400330864|gb|EJO88361.1| two-component sensor protein [Mycobacterium colombiense CECT 3035]
M. shigaense_orf01690	1216500	1216940	+	146	46	0	0	0	COG0784	NA	T	two-component system response regulator [Mycobacterium colombiense CECT 3035] gi|400330863|gb|EJO88360.1| two-component system response regulator [Mycobacterium colombiense CECT 3035]
M. shigaense_orf01692	1218136	1216946	-	396	63	0	0	0	COG1804	NA	C	hypothetical protein MCOL_V215534 [Mycobacterium colombiense CECT 3035] gi|400330856|gb|EJO88353.1| hypothetical protein MCOL_V215534 [Mycobacterium colombiense CECT 3035]
M. shigaense_orf01694	1219076	1218150	-	308	87	0	0	0	COG3315	NA	Q	methyltransferase [Mycobacterium parascrofulaceum ATCC BAA-614] gi|295896401|gb|EFG76054.1| methyltransferase [Mycobacterium parascrofulaceum ATCC BAA-614]
M. shigaense_orf01695	1219202	1220821	+	539	127	0	0	0	NA	NA	NA	acyl-CoA synthetase (AMP-forming)/AMP-acid ligase II [Saccharomonospora marina XMU15] gi|374655408|gb|EHR50241.1| acyl-CoA synthetase (AMP-forming)/AMP-acid ligase II [Saccharomonospora marina XMU15]
M. shigaense_orf01697	1220823	1221599	+	258	67	0	0	0	COG0300	NA	R	short-chain dehydrogenase [Mycobacterium rhodesiae NBB3] gi|359819130|gb|AEV71943.1| short-chain dehydrogenase of unknown substrate specificity [Mycobacterium rhodesiae NBB3]
M. shigaense_orf01698	1223729	1221606	-	707	86	0	0	0	COG2217	NA	P	ctpC [Mycobacterium intracellulare MOTT-02] gi|379763656|ref|YP_005350053.1| ctpC [Mycobacterium intracellulare MOTT-64] gi|387877459|ref|YP_006307763.1| metal cation-transporting P-type ATPase C CtpC [Mycobacterium sp. MOTT36Y] gi|406032348|ref|YP_0 ...
M. shigaense_orf01699	1224060	1223779	-	93	399	0	0	0	NA	NOG13284	NA	hypothetical protein MAV_4234 [Mycobacterium avium 104] gi|254776669|ref|ZP_05218185.1| hypothetical protein MaviaA2_18651 [Mycobacterium avium subsp. avium ATCC 25291] gi|118164760|gb|ABK65657.1| conserved hypothetical protein [Mycobacterium avium 1 ...
M. shigaense_orf01701	1224204	1225640	+	478	67	0	0	0	NA	NOG15166	NA	13e12 repeat-containing protein [Mycobacterium marinum M] gi|183178482|gb|ACC43592.1| conserved hypothetical 13E12 repeat family protein [Mycobacterium marinum M]
M. shigaense_orf01703	1226502	1225783	-	239	153	0	0	0	NA	NOG08644	NA	conserved hypothetical protein [Mycobacterium parascrofulaceum ATCC BAA-614] gi|295896405|gb|EFG76058.1| conserved hypothetical protein [Mycobacterium parascrofulaceum ATCC BAA-614]
M. shigaense_orf01704	1227947	1226508	-	479	116	0	0	0	COG1316	NA	K	cell envelope-related function transcriptional attenuator [Mycobacterium avium 104] gi|254776667|ref|ZP_05218183.1| hypothetical protein MaviaA2_18641 [Mycobacterium avium subsp. avium ATCC 25291] gi|440778861|ref|ZP_20957606.1| hypothetical protein ...
M. shigaense_orf01705	1228032	1228994	+	320	100	0	0	0	COG1091	NA	M	RmlD [Mycobacterium avium subsp. paratuberculosis K-10] gi|417748881|ref|ZP_12397295.1| dTDP-4-dehydrorhamnose reductase [Mycobacterium avium subsp. paratuberculosis S397] gi|41398309|gb|AAS05930.1| RmlD [Mycobacterium avium subsp. paratuberculosis K ...
M. shigaense_orf01707	1228987	1229877	+	296	114	0	0	0	COG1216	NA	R	dTDP-rha:A-D-GlcNAc-diphosphoryl polyprenol A-3- L-rhamnosyl transferase, WbbL1 [Mycobacterium marinum M] gi|183174624|gb|ACC39734.1| dTDP-rha:A-D-Glcnac-diphosphoryl polyprenol A-3- L-rhamnosyl transferase, WbbL1 [Mycobacterium marinum M]
M. shigaense_orf01708	1229900	1230955	+	351	112	0	0	0	COG1208	NA	J,M	RmlA2 [Mycobacterium avium subsp. paratuberculosis K-10] gi|417748883|ref|ZP_12397297.1| Nucleoside-diphosphate-sugar pyrophosphorylase family protein [Mycobacterium avium subsp. paratuberculosis S397] gi|440778858|ref|ZP_20957603.1| RmlA2 [Mycobacte ...
M. shigaense_orf01710	1231488	1230937	-	183	77	0	0	0	COG0494	NOG79966	R,L	hydrolase, nudix family protein, putative [Mycobacterium colombiense CECT 3035] gi|400330846|gb|EJO88343.1| hydrolase, nudix family protein, putative [Mycobacterium colombiense CECT 3035]
M. shigaense_orf01711	1233080	1231485	-	531	62	0	0	0	COG0827	NA	L	DNA methylase [Mycobacterium leprae TN] gi|221229800|ref|YP_002503216.1| DNA methylase [Mycobacterium leprae Br4923] gi|13092871|emb|CAC30265.1| probable DNA methylase [Mycobacterium leprae] gi|219932907|emb|CAR70850.1| probable DNA methylase [Mycoba ...
M. shigaense_orf01714	1234434	1233091	-	447	82	0	0	1	COG0778;COG1478	NA	C,S	F420-0--gamma-glutamyl ligase [Mycobacterium sp. H4Y] gi|442764599|gb|ELR82597.1| F420-0--gamma-glutamyl ligase [Mycobacterium sp. H4Y]
M. shigaense_orf01715	1235210	1234431	-	259	52	0	0	1	COG0391	NA	S	LPPG:FO 2-phospho-L-lactate transferase [Mycobacterium parascrofulaceum ATCC BAA-614] gi|295896413|gb|EFG76066.1| LPPG:FO 2-phospho-L-lactate transferase [Mycobacterium parascrofulaceum ATCC BAA-614]
M. shigaense_orf01716	1235855	1236127	+	90	1136	0	0	1	NA	NOG06564	K	WhiB2 [Mycobacterium avium subsp. paratuberculosis K-10] gi|417748888|ref|ZP_12397302.1| Transcription factor WhiB [Mycobacterium avium subsp. paratuberculosis S397] gi|41398301|gb|AAS05922.1| WhiB2 [Mycobacterium avium subsp. paratuberculosis K-10] ...
M. shigaense_orf01717	1236626	1236147	-	159	388	0	0	1	NA	NOG06565	S	hypothetical protein MAV_4222 [Mycobacterium avium 104] gi|118167054|gb|ABK67951.1| conserved hypothetical protein [Mycobacterium avium 104]
M. shigaense_orf01718	1236794	1237180	+	128	408	0	0	0	NA	NOG07383	NA	hypothetical protein MCOL_V215454 [Mycobacterium colombiense CECT 3035] gi|400330840|gb|EJO88337.1| hypothetical protein MCOL_V215454 [Mycobacterium colombiense CECT 3035]
M. shigaense_orf01719	1237252	1238649	+	465	227	0	0	1	COG1109	NA	G	phosphomannomutase [Mycobacterium parascrofulaceum ATCC BAA-614] gi|295896417|gb|EFG76070.1| phosphomannomutase [Mycobacterium parascrofulaceum ATCC BAA-614]
M. shigaense_orf01721	1238646	1239734	+	362	123	0	0	0	NA	NOG08042	S	hypothetical protein MIP_06142 [Mycobacterium indicus pranii MTCC 9506] gi|405130880|gb|AFS16135.1| Hypothetical protein MIP_06142 [Mycobacterium indicus pranii MTCC 9506]
M. shigaense_orf01723	1239743	1240969	+	408	99	0	0	0	COG1482	NA	G	mannose-6-phosphate isomerase [Mycobacterium parascrofulaceum ATCC BAA-614] gi|295896419|gb|EFG76072.1| mannose-6-phosphate isomerase [Mycobacterium parascrofulaceum ATCC BAA-614]
M. shigaense_orf01725	1241651	1240947	-	234	128	0	0	0	NA	NA	NA	hypothetical protein MUL_2599 [Mycobacterium ulcerans Agy99] gi|118570179|gb|ABL04930.1| conserved hypothetical protein [Mycobacterium ulcerans Agy99]
M. shigaense_orf01728	1242344	1241730	-	204	58	0	0	0	NA	NA	NA	hypothetical protein OCU_40670 [Mycobacterium intracellulare ATCC 13950] gi|378801150|gb|AFC45286.1| hypothetical protein OCU_40670 [Mycobacterium intracellulare ATCC 13950]
M. shigaense_orf01730	1242449	1243933	+	494	64	0	0	0	COG0531	NA	E	amino acid permease [Mycobacterium parascrofulaceum ATCC BAA-614] gi|295896421|gb|EFG76074.1| amino acid permease [Mycobacterium parascrofulaceum ATCC BAA-614]
M. shigaense_orf01731	1243998	1245206	+	402	238	0	0	0	NA	NOG11338	I	alkane-1 monooxygenase [Mycobacterium parascrofulaceum ATCC BAA-614] gi|295896422|gb|EFG76075.1| alkane-1 monooxygenase [Mycobacterium parascrofulaceum ATCC BAA-614]
M. shigaense_orf01732	1245203	1245376	+	57	189	0	0	0	COG1773	NA	C	rubredoxin [Mycobacterium intracellulare ATCC 13950] gi|379756085|ref|YP_005344757.1| rubredoxin [Mycobacterium intracellulare MOTT-02] gi|379763636|ref|YP_005350033.1| rubredoxin [Mycobacterium intracellulare MOTT-64] gi|387877439|ref|YP_006307743.1 ...
M. shigaense_orf01733	1245373	1245555	+	60	222	0	0	0	COG1773	NA	C	Rubredoxin [Mycobacterium xenopi RIVM700367] gi|383337100|gb|EID15483.1| Rubredoxin [Mycobacterium xenopi RIVM700367]
M. shigaense_orf01734	1245596	1246201	+	201	100	0	0	0	NA	NOG281555	NA	transcriptional regulator [Mycobacterium parascrofulaceum ATCC BAA-614] gi|295896425|gb|EFG76078.1| transcriptional regulator [Mycobacterium parascrofulaceum ATCC BAA-614]
M. shigaense_orf01736	1246298	1247755	+	485	349	0	0	0	COG0499	NA	H	S-adenosyl-L-homocysteine hydrolase [Mycobacterium marinum M] gi|443489774|ref|YP_007367921.1| adenosylhomocysteinase SahH [Mycobacterium liflandii 128FXT] gi|226695340|sp|B2HEP6.1|SAHH_MYCMM RecName: Full=Adenosylhomocysteinase; AltName: Full=S-aden ...
M. shigaense_orf01739	1247794	1248426	+	210	153	0	0	0	COG0125	NA	F	thymidylate kinase [Mycobacterium avium subsp. paratuberculosis K-10] gi|417748901|ref|ZP_12397315.1| thymidylate kinase [Mycobacterium avium subsp. paratuberculosis S397] gi|440778840|ref|ZP_20957585.1| thymidylate kinase [Mycobacterium avium subsp. ...
M. shigaense_orf01740	1248507	1249193	+	228	737	0	0	1	COG0745	NA	K,T	two component system transcriptional regulator mtrA [Mycobacterium tuberculosis SUMu004] gi|308333099|gb|EFP21950.1| two component system transcriptional regulator mtrA [Mycobacterium tuberculosis SUMu004]
M. shigaense_orf01741	1249264	1250898	+	544	199	0	0	1	COG0642	NA	T	sensor histidine kinase MtrB [Mycobacterium parascrofulaceum ATCC BAA-614] gi|295896429|gb|EFG76082.1| sensor histidine kinase MtrB [Mycobacterium parascrofulaceum ATCC BAA-614]
M. shigaense_orf01744	1250898	1252673	+	591	90	0	0	0	NA	NOG05516	S	conserved lipoprotein LpqB [Mycobacterium liflandii 128FXT] gi|442582279|gb|AGC61422.1| conserved lipoprotein LpqB [Mycobacterium liflandii 128FXT]
M. shigaense_orf01746	1252717	1253385	+	222	19	0	0	0	NA	NA	NA	hypothetical protein OCQ_41740 [Mycobacterium intracellulare MOTT-64] gi|406032320|ref|YP_006731212.1| hypothetical protein MIP_06124 [Mycobacterium indicus pranii MTCC 9506] gi|378811552|gb|AFC55686.1| hypothetical protein OCQ_41740 [Mycobacterium i ...
M. shigaense_orf01748	1253718	1254422	+	234	650	0	0	1	COG1544	NA	J	S30AE family protein [Mycobacterium tuberculosis CDC1551] gi|298526717|ref|ZP_07014126.1| S30AE family protein [Mycobacterium tuberculosis 94_M4241A] gi|306777570|ref|ZP_07415907.1| hypothetical protein TMAG_02694 [Mycobacterium tuberculosis SUMu001] ...
M. shigaense_orf01750	1254534	1257344	+	936	231	0	0	1	COG0653	NA	U	preprotein translocase subunit SecA [Mycobacterium intracellulare MOTT-02] gi|443307210|ref|ZP_21036997.1| preprotein translocase subunit SecA [Mycobacterium sp. H4Y] gi|378806290|gb|AFC50425.1| preprotein translocase subunit SecA [Mycobacterium intr ...
M. shigaense_orf01752	1257376	1258818	+	480	78	0	0	0	COG1113	NA	E	gamma-aminobutyrate permease [Rhodococcus opacus B4] gi|226241256|dbj|BAH51604.1| gamma-aminobutyrate permease [Rhodococcus opacus B4]
M. shigaense_orf01753	1258893	1259375	+	160	128	0	0	0	COG0490	NA	P	TrkA domain-containing protein [Mycobacterium xenopi RIVM700367] gi|383335607|gb|EID14037.1| TrkA domain-containing protein [Mycobacterium xenopi RIVM700367]
M. shigaense_orf01755	1259380	1260522	+	380	76	0	0	0	COG0475	NA	P	transmembrane transport protein [Mycobacterium leprae TN] gi|221229820|ref|YP_002503236.1| transmembrane transport protein [Mycobacterium leprae Br4923] gi|13092891|emb|CAC30291.1| putative transmembrane transport protein [Mycobacterium leprae] gi|21 ...
M. shigaense_orf01757	1261105	1260584	-	173	61	0	0	0	NA	NA	NA	hypothetical protein MAV_4197 [Mycobacterium avium 104] gi|118163663|gb|ABK64560.1| conserved hypothetical protein [Mycobacterium avium 104]
M. shigaense_orf01759	1261295	1262704	+	469	94	0	0	0	NA	NOG09285	S	hypothetical protein MAP3347c [Mycobacterium avium subsp. paratuberculosis K-10] gi|118467116|ref|YP_883341.1| acyltransferase, ws/dgat/mgat subfamily protein [Mycobacterium avium 104] gi|417748915|ref|ZP_12397328.1| acyltransferase, WS/DGAT/MGAT [My ...
M. shigaense_orf01760	1262750	1263610	+	286	152	0	0	0	COG2326	NA	S	putative transcriptional regulatory protein [Mycobacterium xenopi RIVM700367] gi|383335603|gb|EID14033.1| putative transcriptional regulatory protein [Mycobacterium xenopi RIVM700367]
M. shigaense_orf01761	1263607	1264125	+	172	258	0	0	0	NA	NOG07384	NA	hypothetical protein KEK_22534 [Mycobacterium thermoresistibile ATCC 19527] gi|356477452|gb|EHI10598.1| hypothetical protein KEK_22534 [Mycobacterium thermoresistibile ATCC 19527]
M. shigaense_orf01762	1264187	1265338	+	383	991	0	0	0	COG1018	NA	C	oxidoreductase [Mycobacterium parascrofulaceum ATCC BAA-614] gi|295896323|gb|EFG75979.1| oxidoreductase [Mycobacterium parascrofulaceum ATCC BAA-614]
M. shigaense_orf01764	1265442	1266725	+	427	1177	0	0	0	COG3239	NA	I	DesA3_1 [Mycobacterium avium subsp. paratuberculosis K-10] gi|118465159|ref|YP_883337.1| Fatty acid desaturase [Mycobacterium avium 104] gi|417748919|ref|ZP_12397332.1| fatty acid desaturase [Mycobacterium avium subsp. paratuberculosis S397] gi|41398 ...
M. shigaense_orf01765	1267582	1266737	-	281	432	0	0	0	NA	NA	NA	short-chain dehydrogenase/reductase SDR [Mycobacterium tusciae JS617] gi|373547797|gb|EHP74512.1| short-chain dehydrogenase/reductase SDR [Mycobacterium tusciae JS617]
M. shigaense_orf01768	1268251	1267646	-	201	348	0	0	0	NA	NA	NA	hypothetical protein MAP0080c [Mycobacterium avium subsp. paratuberculosis K-10] gi|440775427|ref|ZP_20954299.1| hypothetical protein D522_00501 [Mycobacterium avium subsp. paratuberculosis S5] gi|41394526|gb|AAS02397.1| hypothetical protein MAP_0080 ...
M. shigaense_orf01771	1270253	1268307	-	648	121	0	0	0	COG2217	NA	P	cadmium-translocating P-type ATPase [Mycobacterium smegmatis MKD8] gi|440625246|gb|ELQ87098.1| cadmium-translocating P-type ATPase [Mycobacterium smegmatis MKD8]
M. shigaense_orf01772	1270380	1270709	+	109	211	0	0	0	COG0640	NA	K	ArsR family transcriptional regulator [Mycobacterium fortuitum subsp. fortuitum DSM 46621] gi|403655031|gb|EJZ09913.1| ArsR family transcriptional regulator [Mycobacterium fortuitum subsp. fortuitum DSM 46621]
M. shigaense_orf01773	1271345	1270713	-	210	86	0	0	0	NA	NOG13668;NOG140386	P	cation efflux family protein [Rhodococcus sp. JVH1] gi|396929975|gb|EJI97174.1| cation efflux family protein [Rhodococcus sp. JVH1]
M. shigaense_orf01775	1271653	1271345	-	102	100	0	0	0	COG0640	NA	K	putative transcriptional regulator [Mycobacterium smegmatis JS623] gi|433298629|gb|AGB24449.1| putative transcriptional regulator [Mycobacterium smegmatis JS623]
M. shigaense_orf01777	1272509	1271775	-	244	75	0	0	0	COG1814	NA	S	nodulin 21 family protein [Rhodococcus equi ATCC 33707] gi|325552164|gb|EGD21855.1| nodulin 21 family protein [Rhodococcus equi ATCC 33707]
M. shigaense_orf01778	1272630	1273121	+	163	71	0	0	0	NA	NOG135033	NA	hypothetical protein Mycsm_00607 [Mycobacterium smegmatis JS623] gi|433295234|gb|AGB21054.1| hypothetical protein Mycsm_00607 [Mycobacterium smegmatis JS623]
M. shigaense_orf01779	1273174	1273683	+	169	214	0	0	0	NA	NOG121128	NA	hypothetical protein MaviaA2_18129 [Mycobacterium avium subsp. avium ATCC 25291]
M. shigaense_orf01780	1273751	1273984	+	77	271	0	0	0	NA	NA	NA	hypothetical protein MintA_12441 [Mycobacterium intracellulare ATCC 13950] gi|379748522|ref|YP_005339343.1| hypothetical protein OCU_38030 [Mycobacterium intracellulare ATCC 13950] gi|379755807|ref|YP_005344479.1| hypothetical protein OCO_37950 [Myco ...
M. shigaense_orf01781	1274775	1274942	+	55	86	0	0	0	NA	NA	NA	aldo/keto reductase [Streptomyces violaceusniger Tu 4113] gi|344041058|gb|AEM86783.1| aldo/keto reductase [Streptomyces violaceusniger Tu 4113]
M. shigaense_orf01782	1274752	1273955	-	265	114	0	0	0	COG1396	NA	K	helix-turn-helix domain-containing protein [Streptomyces violaceusniger Tu 4113] gi|344041059|gb|AEM86784.1| helix-turn-helix domain protein [Streptomyces violaceusniger Tu 4113]
M. shigaense_orf01783	1275061	1275237	+	58	181	0	0	0	NA	NA	NA	aldo/keto reductase [Streptomyces violaceusniger Tu 4113] gi|344041058|gb|AEM86783.1| aldo/keto reductase [Streptomyces violaceusniger Tu 4113]
M. shigaense_orf01784	1276491	1276249	-	80	1691	1	0	0	NA	NA	NA	NA
M. shigaense_orf01787	1276849	1276526	-	107	2789	0	0	0	NA	NA	NA	hypothetical protein MyctuDRAFT_2531 [Mycobacterium tusciae JS617] gi|373551952|gb|EHP78569.1| hypothetical protein MyctuDRAFT_2531 [Mycobacterium tusciae JS617]
M. shigaense_orf01788	1276969	1277334	+	121	340	0	0	0	COG1937	NA	S	hypothetical protein Psed_1302 [Pseudonocardia dioxanivorans CB1190] gi|326949848|gb|AEA23545.1| protein of unknown function DUF156 [Pseudonocardia dioxanivorans CB1190]
M. shigaense_orf01789	1278536	1277349	-	395	69	0	0	0	COG0183	NA	I	fadA6_4 [Mycobacterium intracellulare ATCC 13950] gi|379756061|ref|YP_005344733.1| fadA6_4 [Mycobacterium intracellulare MOTT-02] gi|378801123|gb|AFC45259.1| fadA6_4 [Mycobacterium intracellulare ATCC 13950] gi|378806277|gb|AFC50412.1| fadA6_4 [Mycob ...
M. shigaense_orf01791	1278636	1279109	+	157	318	0	0	0	COG1733	NA	K	putative transcriptional regulator family protein [Mycobacterium intracellulare ATCC 13950] gi|379748758|ref|YP_005339579.1| putative transcriptional regulator family protein [Mycobacterium intracellulare ATCC 13950] gi|379756060|ref|YP_005344732.1| ...
M. shigaense_orf01792	1280082	1279096	-	328	175	0	0	1	COG1162	NA	R	hypothetical protein MMAR_1319 [Mycobacterium marinum M] gi|443489799|ref|YP_007367946.1| ribosome biogenesis GTPase [Mycobacterium liflandii 128FXT] gi|183174667|gb|ACC39777.1| conserved hypothetical protein [Mycobacterium marinum M] gi|442582296|gb ...
M. shigaense_orf01793	1281434	1280079	-	451	94	0	0	0	COG0128	NA	E	3-phosphoshikimate 1-carboxyvinyltransferase [Mycobacterium avium subsp. paratuberculosis K-10] gi|81831642|sp|Q73UN2.1|AROA_MYCPA RecName: Full=3-phosphoshikimate 1-carboxyvinyltransferase; AltName: Full=5-enolpyruvylshikimate-3-phosphate synthase; ...
M. shigaense_orf01794	1281504	1282289	+	261	82	0	0	0	COG2135	NA	S	hypothetical protein MintA_04454 [Mycobacterium intracellulare ATCC 13950] gi|379748755|ref|YP_005339576.1| hypothetical protein OCU_40360 [Mycobacterium intracellulare ATCC 13950] gi|379756057|ref|YP_005344729.1| hypothetical protein OCO_40450 [Myco ...
M. shigaense_orf01796	1282302	1282673	+	123	153	1	0	0	NA	NA	NA	IstB domain protein ATP-binding protein [Mycobacterium tusciae JS617] gi|373545011|gb|EHP71871.1| IstB domain protein ATP-binding protein [Mycobacterium tusciae JS617]
M. shigaense_orf01797	1282688	1284178	+	496	84	1	0	0	NA	NA	NA	di-tripeptide ABC transporter (permease) [Saccharopolyspora erythraea NRRL 2338]
M. shigaense_orf01798	1284214	1285011	+	265	71	1	0	0	NA	NA	NA	glycine dehydrogenase [Stackebrandtia nassauensis DSM 44728] gi|290569443|gb|ADD42408.1| Glycine dehydrogenase (decarboxylating) [Stackebrandtia nassauensis DSM 44728]
M. shigaense_orf01799	1285034	1285570	+	178	86	1	0	0	NA	NA	NA	glycine dehydrogenase subunit 1 [Brevibacillus brevis NBRC 100599] gi|226098299|dbj|BAH46741.1| putative glycine dehydrogenase [decarboxylating] subunit 1 [Brevibacillus brevis NBRC 100599]
M. shigaense_orf01800	1285567	1285728	+	53	115	1	0	0	NA	NA	NA	NA
M. shigaense_orf01802	1285961	1285725	-	78	130	0	0	0	NA	NA	NA	conserved hypothetical protein [Mycobacterium parascrofulaceum ATCC BAA-614] gi|295896338|gb|EFG75994.1| conserved hypothetical protein [Mycobacterium parascrofulaceum ATCC BAA-614]
M. shigaense_orf01803	1286647	1286015	-	210	111	0	0	0	NA	NOG279989;NOG73216	NA	hypothetical protein OCU_40320 [Mycobacterium intracellulare ATCC 13950] gi|378801115|gb|AFC45251.1| hypothetical protein OCU_40320 [Mycobacterium intracellulare ATCC 13950]
M. shigaense_orf01804	1287314	1286649	-	221	204	0	0	0	COG1028	NA	I,Q,R	hypothetical protein W7U_16095 [Mycobacterium sp. H4Y] gi|442764558|gb|ELR82556.1| hypothetical protein W7U_16095 [Mycobacterium sp. H4Y]
M. shigaense_orf01805	1287392	1288141	+	249	71	0	1	0	COG1028	NA	I,Q,R	oxidoreductase, short chain dehydrogenase/reductase family protein [Mycobacterium avium subsp. avium ATCC 25291]
M. shigaense_orf01806	1289589	1288168	-	473	86	0	0	0	COG1233	NA	Q	dehydrogenase [Mycobacterium marinum M] gi|183174922|gb|ACC40032.1| dehydrogenase [Mycobacterium marinum M]
M. shigaense_orf01807	1291361	1289586	-	591	75	0	0	0	NA	NOG42967	S	transmembrane protein [Rhodococcus sp. JVH1] gi|396927126|gb|EJI94360.1| transmembrane protein [Rhodococcus sp. JVH1]
M. shigaense_orf01808	1291439	1292785	+	448	53	0	0	0	COG2508	NA	Q,T	hypothetical protein MMAR_1323 [Mycobacterium marinum M] gi|183174671|gb|ACC39781.1| conserved hypothetical protein [Mycobacterium marinum M]
M. shigaense_orf01809	1293039	1293533	+	164	283	0	0	0	COG3247	NA	S	hypothetical protein nfa31070 [Nocardia farcinica IFM 10152] gi|54016584|dbj|BAD57954.1| hypothetical protein [Nocardia farcinica IFM 10152]
M. shigaense_orf01810	1293991	1293539	-	150	132	0	0	0	COG2508	NA	Q,T	hypothetical protein RHA1_ro04493 [Rhodococcus jostii RHA1] gi|110820995|gb|ABG96279.1| conserved hypothetical protein [Rhodococcus jostii RHA1]
M. shigaense_orf01811	1293942	1294169	+	75	101	1	0	0	NA	NA	NA	poly(3-hydroxyalkanoic acid) synthase [Rhodococcus jostii RHA1] gi|110820993|gb|ABG96277.1| poly(3-hydroxyalkanoic acid) synthase [Rhodococcus jostii RHA1]
M. shigaense_orf01813	1294203	1294424	+	73	100	1	0	0	NA	NA	NA	poly(3-hydroxyalkanoate) depolymerase [Rhodococcus jostii RHA1] gi|110817305|gb|ABG92589.1| probable poly(3-hydroxyalkanoate) depolymerase [Rhodococcus jostii RHA1]
M. shigaense_orf01814	1294482	1294946	+	154	42	1	0	0	NA	NA	NA	polyhydroxyalkanoate depolymerase [Rhodococcus opacus B4] gi|226241530|dbj|BAH51878.1| polyhydroxyalkanoate depolymerase [Rhodococcus opacus B4]
M. shigaense_orf01816	1295278	1295790	+	170	118	0	0	0	COG2230	NA	M	CmaA1 [Mycobacterium avium subsp. avium ATCC 25291]
M. shigaense_orf01817	1295821	1296132	+	103	112	0	0	0	NA	NA	NA	cmaA1 [Mycobacterium colombiense CECT 3035] gi|400331238|gb|EJO88734.1| cmaA1 [Mycobacterium colombiense CECT 3035]
M. shigaense_orf01819	1296993	1296142	-	283	137	0	0	0	COG1028	NA	I,Q,R	dehydrogenase of unknown specificity, short-chain alcohol dehydrogenase like protein [Mycobacterium avium subsp. paratuberculosis S397] gi|336459507|gb|EGO38444.1| dehydrogenase of unknown specificity, short-chain alcohol dehydrogenase like protein [ ...
M. shigaense_orf01820	1297185	1297949	+	254	432	0	0	0	COG1595	NA	K	RNA polymerase sigma factor RpoE [Mycobacterium intracellulare ATCC 13950] gi|378801105|gb|AFC45241.1| RNA polymerase sigma factor RpoE [Mycobacterium intracellulare ATCC 13950]
M. shigaense_orf01821	1297946	1298248	+	100	384	0	0	0	NA	NOG40615	S	mycothiol system anti-sigma-R factor [Mycobacterium smegmatis JS623] gi|433296012|gb|AGB21832.1| mycothiol system anti-sigma-R factor [Mycobacterium smegmatis JS623]
M. shigaense_orf01823	1298545	1298766	+	73	452	0	0	1	COG0511	NA	I	putative acetyl-CoA carboxylase biotin carboxyl carrier protein subunit [Mycobacterium intracellulare ATCC 13950] gi|379756042|ref|YP_005344714.1| putative acetyl-CoA carboxylase biotin carboxyl carrier protein subunit [Mycobacterium intracellulare M ...
M. shigaense_orf01825	1298784	1300286	+	500	132	0	0	1	COG3920	NA	T	sensor histidine kinase [Mycobacterium parascrofulaceum ATCC BAA-614] gi|295896345|gb|EFG76001.1| sensor histidine kinase [Mycobacterium parascrofulaceum ATCC BAA-614]
M. shigaense_orf01827	1300621	1300367	-	84	2070	0	0	1	NA	NOG06566	K	WhiB1 [Mycobacterium avium subsp. paratuberculosis K-10] gi|118462344|ref|YP_883314.1| transcription factor WhiB [Mycobacterium avium 104] gi|254776606|ref|ZP_05218122.1| transcription factor WhiB [Mycobacterium avium subsp. avium ATCC 25291] gi|2548 ...
M. shigaense_orf01828	1301880	1300912	-	322	74	0	0	0	COG1597	NA	I,R	hypothetical protein MAP3319 [Mycobacterium avium subsp. paratuberculosis K-10] gi|118462768|ref|YP_883313.1| diacylglycerol kinase catalytic subunit [Mycobacterium avium 104] gi|417748945|ref|ZP_12397357.1| sphingosine/diacylglycerol kinase-like enz ...
M. shigaense_orf01831	1301994	1302398	+	134	89	0	0	0	NA	NOG08645;NOG135272	NA	Conserved integral membrane protein of unknown function [Mycobacterium canettii CIPT 140070008] gi|432159955|emb|CCK57270.1| Conserved integral membrane protein of unknown function [Mycobacterium canettii CIPT 140070008]
M. shigaense_orf01833	1302832	1302350	-	160	69	0	0	0	COG0454	NA	K,R	N-acetyltransferase Ats1 [Mycobacterium canettii CIPT 140070017] gi|432167901|emb|CCK65423.1| N-acetyltransferase Ats1 [Mycobacterium canettii CIPT 140070017]
M. shigaense_orf01834	1303929	1302829	-	366	91	0	0	0	COG1169	NA	Q,H	isochorismate synthase [Mycobacterium parascrofulaceum ATCC BAA-614] gi|295896350|gb|EFG76006.1| isochorismate synthase [Mycobacterium parascrofulaceum ATCC BAA-614]
M. shigaense_orf01835	1304537	1303926	-	203	106	0	0	0	COG0406	NA	G	phosphoglycerate mutase Gpm2 [Mycobacterium parascrofulaceum ATCC BAA-614] gi|295896351|gb|EFG76007.1| phosphoglycerate mutase Gpm2 [Mycobacterium parascrofulaceum ATCC BAA-614]
M. shigaense_orf01836	1304618	1305418	+	266	198	0	0	0	COG1192	NA	D	sporulation initiation inhibitor protein Soj [Mycobacterium parascrofulaceum ATCC BAA-614] gi|295896352|gb|EFG76008.1| sporulation initiation inhibitor protein Soj [Mycobacterium parascrofulaceum ATCC BAA-614]
M. shigaense_orf01837	1306646	1305426	-	406	434	0	0	0	NA	NOG05967	NA	hypothetical protein MaviaA2_18291 [Mycobacterium avium subsp. avium ATCC 25291]
M. shigaense_orf01840	1308199	1306661	-	512	726	0	0	1	COG0513	NA	K,J,L	ATP-dependent RNA helicase RhlE [Mycobacterium liflandii 128FXT] gi|442582324|gb|AGC61467.1| ATP-dependent RNA helicase RhlE [Mycobacterium liflandii 128FXT]
M. shigaense_orf01842	1308239	1308412	+	57	439	1	0	0	NA	NA	NA	NA
M. shigaense_orf01843	1308441	1309136	+	231	200	0	0	0	NA	NOG12874	S	conserved hypothetical protein [Mycobacterium parascrofulaceum ATCC BAA-614] gi|295896311|gb|EFG75968.1| conserved hypothetical protein [Mycobacterium parascrofulaceum ATCC BAA-614]
M. shigaense_orf01846	1309991	1309200	-	263	220	0	0	0	NA	NOG12469	NA	putative threonine and proline rich protein [Mycobacterium liflandii 128FXT] gi|442582326|gb|AGC61469.1| putative threonine and proline rich protein [Mycobacterium liflandii 128FXT]
M. shigaense_orf01847	1310137	1310397	+	86	229	0	0	0	NA	NOG08646	S	hypothetical protein MXEN_10009 [Mycobacterium xenopi RIVM700367] gi|383335578|gb|EID14008.1| hypothetical protein MXEN_10009 [Mycobacterium xenopi RIVM700367]
M. shigaense_orf01848	1310998	1310384	-	204	180	0	0	1	COG1309	NA	K	tetR-family protein transcriptional regulator [Mycobacterium colombiense CECT 3035] gi|400330770|gb|EJO88267.1| tetR-family protein transcriptional regulator [Mycobacterium colombiense CECT 3035]
M. shigaense_orf01849	1311290	1312279	+	329	141	0	0	1	NA	NOG05187	S	hypothetical protein MaviaA2_18261 [Mycobacterium avium subsp. avium ATCC 25291]
M. shigaense_orf01850	1312313	1313503	+	396	123	0	0	1	COG0476;COG0607	NA	H,P	molybdopterin biosynthesis-like protein MoeZ [Mycobacterium bovis AF2122/97] gi|31619979|emb|CAD95323.1| PROBABLE MOLYBDENUM COFACTOR BIOSYNTHESIS PROTEIN MOEB1 (MPT-SYNTHASE SULFURYLASE) (MOLYBDOPTERIN SYNTHASE SULPHURYLASE) [Mycobacterium bovis AF2 ...
M. shigaense_orf01851	1313598	1314452	+	284	97	0	0	1	NA	NOG06567	S	conserved hypothetical protein [Mycobacterium parascrofulaceum ATCC BAA-614] gi|295896317|gb|EFG75974.1| conserved hypothetical protein [Mycobacterium parascrofulaceum ATCC BAA-614]
M. shigaense_orf01852	1314771	1314463	-	102	127	0	0	0	COG3695	NA	L	DNA-methyltransferase (modification methylase) [Mycobacterium intracellulare ATCC 13950] gi|379748721|ref|YP_005339542.1| DNA-methyltransferase (modification methylase) [Mycobacterium intracellulare ATCC 13950] gi|379763557|ref|YP_005349954.1| DNA-me ...
M. shigaense_orf01854	1315558	1314773	-	261	66	0	0	0	COG0596	NOG86837	R	LipV [Mycobacterium avium subsp. paratuberculosis K-10] gi|417748961|ref|ZP_12397373.1| lysophospholipase [Mycobacterium avium subsp. paratuberculosis S397] gi|440778776|ref|ZP_20957526.1| hypothetical protein D522_19036 [Mycobacterium avium subsp. p ...
M. shigaense_orf01856	1315635	1318793	+	1052	63	0	0	0	COG2887;COG0210	NA	L	DNA/RNA helicase, superfamily I [Mycobacterium avium subsp. paratuberculosis S397] gi|336459531|gb|EGO38468.1| DNA/RNA helicase, superfamily I [Mycobacterium avium subsp. paratuberculosis S397]
M. shigaense_orf01857	1318790	1322107	+	1105	62	0	0	0	COG2887;COG0210	NA	L	hypothetical protein OCU_39980 [Mycobacterium intracellulare ATCC 13950] gi|378801081|gb|AFC45217.1| hypothetical protein OCU_39980 [Mycobacterium intracellulare ATCC 13950]
M. shigaense_orf01858	1322175	1323245	+	356	75	0	0	0	COG1226	NA	P	ion channel membrane protein [Mycobacterium parascrofulaceum ATCC BAA-614] gi|295896289|gb|EFG75948.1| ion channel membrane protein [Mycobacterium parascrofulaceum ATCC BAA-614]
M. shigaense_orf01859	1323264	1324187	+	307	63	0	0	0	COG2816	NA	L	hypothetical protein MaviaA2_18211 [Mycobacterium avium subsp. avium ATCC 25291]
M. shigaense_orf01861	1324792	1324205	-	195	121	0	0	0	NA	NA	NA	Conserved protein of unknown function, possible lipoprotein LpqQ [Mycobacterium canettii CIPT 140070010] gi|432161513|emb|CCK58857.1| Conserved protein of unknown function, possible lipoprotein LpqQ [Mycobacterium canettii CIPT 140070010]
M. shigaense_orf01862	1325322	1327448	+	708	96	0	0	1	COG0210	NA	L	hypothetical protein OCQ_41130 [Mycobacterium intracellulare MOTT-64] gi|406032257|ref|YP_006731149.1| DNA helicase II -like protein [Mycobacterium indicus pranii MTCC 9506] gi|378811491|gb|AFC55625.1| hypothetical protein OCQ_41130 [Mycobacterium in ...
M. shigaense_orf01864	1327536	1327676	+	46	2659	1	0	0	NA	NA	NA	NA
M. shigaense_orf01865	1327809	1328078	+	89	2169	0	0	1	NA	NOG08131	NA	transcription factor WhiB [Mycobacterium parascrofulaceum ATCC BAA-614] gi|295896295|gb|EFG75954.1| transcription factor WhiB [Mycobacterium parascrofulaceum ATCC BAA-614]
M. shigaense_orf01866	1325147	1324893	-	84	309	0	0	0	COG0695	NA	O	glutaredoxin protein [Mycobacterium colombiense CECT 3035] gi|400330758|gb|EJO88255.1| glutaredoxin protein [Mycobacterium colombiense CECT 3035]
M. shigaense_orf01867	1328184	1329134	+	316	442	0	0	0	COG2801	NA	L	integrase catalytic subunit [Mycobacterium sp. MCS] gi|108800901|ref|YP_641098.1| integrase catalytic subunit [Mycobacterium sp. MCS] gi|119868626|ref|YP_938578.1| integrase catalytic subunit [Mycobacterium sp. KMS] gi|119870041|ref|YP_939993.1| inte ...
M. shigaense_orf01868	1330514	1329174	-	446	315	0	0	0	COG0661	NA	R	hypothetical protein MAP3295 [Mycobacterium avium subsp. paratuberculosis K-10] gi|254776578|ref|ZP_05218094.1| hypothetical protein MaviaA2_18184 [Mycobacterium avium subsp. avium ATCC 25291] gi|417748970|ref|ZP_12397382.1| putative unusual protein ...
M. shigaense_orf01869	1331495	1330566	-	309	61	0	0	0	NA	NOG45063	NA	hypothetical protein MaviaA2_18179 [Mycobacterium avium subsp. avium ATCC 25291]
M. shigaense_orf01870	1331595	1332446	+	283	118	0	0	0	NA	NA	NA	hypothetical protein MMAR_2539 [Mycobacterium marinum M] gi|183175878|gb|ACC40988.1| conserved hypothetical protein [Mycobacterium marinum M]
M. shigaense_orf01871	1333811	1332456	-	451	289	0	0	1	COG5282	NA	S	hypothetical protein W7S_19920 [Mycobacterium sp. MOTT36Y] gi|386790818|gb|AFJ36937.1| hypothetical protein W7S_19920 [Mycobacterium sp. MOTT36Y]
M. shigaense_orf01873	1333908	1334930	+	340	92	0	0	1	COG3480	NA	T	hypothetical protein MAP3292c [Mycobacterium avium subsp. paratuberculosis K-10] gi|254776575|ref|ZP_05218091.1| PDZ domain-containing protein [Mycobacterium avium subsp. avium ATCC 25291] gi|440778761|ref|ZP_20957514.1| hypothetical protein D522_189 ...
M. shigaense_orf01874	1335020	1338001	+	993	102	0	0	1	COG1615	NA	S	hypothetical protein MAV_4137 [Mycobacterium avium 104] gi|148841366|sp|A0QK47.1|Y4137_MYCA1 RecName: Full=UPF0182 protein MAV_4137 gi|118167484|gb|ABK68381.1| conserved hypothetical protein [Mycobacterium avium 104]
M. shigaense_orf01875	1338946	1338005	-	313	52	0	0	0	COG4977	NA	K	AraC family transcriptional regulator [Mycobacterium colombiense CECT 3035] gi|400330750|gb|EJO88247.1| AraC family transcriptional regulator [Mycobacterium colombiense CECT 3035]
M. shigaense_orf01877	1339032	1339694	+	220	45	0	0	0	NA	NOG13746	R	metal-dependent phosphohydrolase [Mycobacterium avium subsp. avium ATCC 25291]
M. shigaense_orf01879	1339711	1340238	+	175	55	0	0	0	NA	NA	NA	cupin domain-containing protein [Mycobacterium sp. H4Y] gi|442764510|gb|ELR82508.1| cupin domain-containing protein [Mycobacterium sp. H4Y]
M. shigaense_orf01880	1340719	1340372	-	115	72	0	0	0	NA	NOG137229	R	predicted protein [Streptomyces sp. AA4] gi|302436556|gb|EFL08372.1| predicted protein [Streptomyces sp. AA4]
M. shigaense_orf01881	1340944	1341465	+	173	567	0	0	0	COG5516	NA	R	hypothetical protein SHJG_1297 [Streptomyces hygroscopicus subsp. jinggangensis 5008] gi|474979666|ref|YP_007690132.1| hypothetical protein SHJGH_1132 [Streptomyces hygroscopicus subsp. jinggangensis TL01] gi|374097689|gb|AEY86573.1| hypothetical pro ...
M. shigaense_orf01882	1342910	1341657	-	417	177	0	0	0	COG2421	NA	C	putative acetamidase [Gordonia sputi NBRC 100414] gi|377528080|dbj|GAB39199.1| putative acetamidase [Gordonia sputi NBRC 100414]
M. shigaense_orf01883	1343185	1343313	+	42	149	1	0	0	NA	NA	NA	NA
M. shigaense_orf01884	1343917	1343471	-	148	106	1	0	0	NA	NA	NA	MarR family transcriptional regulator [Nocardia brasiliensis ATCC 700358] gi|407311113|gb|AFU05014.1| MarR family transcriptional regulator [Nocardia brasiliensis ATCC 700358]
M. shigaense_orf01885	1344055	1345140	+	361	135	1	0	0	NA	NA	NA	putative regulatory protein [Nocardia brasiliensis ATCC 700358] gi|407311114|gb|AFU05015.1| putative regulatory protein [Nocardia brasiliensis ATCC 700358]
M. shigaense_orf01886	1345507	1345235	-	90	64	1	0	0	NA	NA	NA	transporter yycB [Streptomyces cattleya NRRL 8057 = DSM 46488] gi|386359146|ref|YP_006057392.1| cyanate transport system protein [Streptomyces cattleya NRRL 8057 = DSM 46488] gi|337769473|emb|CCB78186.1| Uncharacterized transporter yycB [Streptomyces ...
M. shigaense_orf01887	1346456	1346073	-	127	80	0	0	0	NA	NOG80790	S	hypothetical protein MMAR_2603 [Mycobacterium marinum M] gi|183175939|gb|ACC41049.1| hypothetical protein MMAR_2603 [Mycobacterium marinum M]
M. shigaense_orf01890	1346927	1346460	-	155	88	0	0	0	NA	NOG42327	S	hypothetical protein MUL_3157 [Mycobacterium ulcerans Agy99] gi|183982612|ref|YP_001850903.1| hypothetical protein MMAR_2602 [Mycobacterium marinum M] gi|443490544|ref|YP_007368691.1| hypothetical protein MULP_02333 [Mycobacterium liflandii 128FXT] g ...
M. shigaense_orf01891	1347387	1347046	-	113	93	0	0	0	NA	NA	NA	hypothetical protein MMAR_2601 [Mycobacterium marinum M] gi|183175937|gb|ACC41047.1| conserved protein [Mycobacterium marinum M]
M. shigaense_orf01892	1347912	1347442	-	156	106	0	0	0	NA	NA	NA	HxlR family transcriptional regulator [Mycobacterium xenopi RIVM700367] gi|383332123|gb|EID10607.1| HxlR family transcriptional regulator [Mycobacterium xenopi RIVM700367]
M. shigaense_orf01893	1348066	1348329	+	87	69	0	0	0	NA	NA	NA	hypothetical protein MCOL_V222553 [Mycobacterium colombiense CECT 3035] gi|400329238|gb|EJO86738.1| hypothetical protein MCOL_V222553 [Mycobacterium colombiense CECT 3035]
M. shigaense_orf01894	1348821	1348333	-	162	106	0	0	0	COG0386	NA	O	glutathione peroxidase [Mycobacterium colombiense CECT 3035] gi|400330747|gb|EJO88244.1| glutathione peroxidase [Mycobacterium colombiense CECT 3035]
M. shigaense_orf01895	1349030	1348890	-	46	95	1	0	0	NA	NA	NA	NA
M. shigaense_orf01896	1349401	1348997	-	134	48	0	0	0	NA	NOG80346	NA	putative membrane protein [Mycobacterium smegmatis JS623] gi|433300700|gb|AGB26520.1| putative membrane protein [Mycobacterium smegmatis JS623]
M. shigaense_orf01898	1349671	1350003	+	110	95	0	0	0	NA	NA	NA	hypothetical protein MCOL_V224642 [Mycobacterium colombiense CECT 3035] gi|400328679|gb|EJO86190.1| hypothetical protein MCOL_V224642 [Mycobacterium colombiense CECT 3035]
M. shigaense_orf01900	1350106	1351473	+	455	211	0	0	0	NA	NA	NA	integral membrane transporter [Mycobacterium smegmatis str. MC2 155] gi|118473648|ref|YP_885422.1| integral membrane transporter [Mycobacterium smegmatis str. MC2 155] gi|118173237|gb|ABK74133.1| integral membrane transporter [Mycobacterium smegmatis ...
M. shigaense_orf01901	1351470	1351586	+	38	525	0	0	0	NA	NA	NA	NA
M. shigaense_orf01903	1351634	1352062	+	142	961	0	0	0	NA	NOG43519	NA	pyridoxamine 5'-phosphate oxidase family protein [Mycobacterium intracellulare ATCC 13950] gi|379746370|ref|YP_005337191.1| pyridoxamine 5'-phosphate oxidase family protein [Mycobacterium intracellulare ATCC 13950] gi|379753643|ref|YP_005342315.1| py ...
M. shigaense_orf01905	1352763	1352077	-	228	1578	0	0	0	NA	NOG40010	NA	antar domain protein [Mycobacterium parascrofulaceum ATCC BAA-614] gi|295896228|gb|EFG75890.1| antar domain protein [Mycobacterium parascrofulaceum ATCC BAA-614]
M. shigaense_orf01907	1353506	1353048	-	152	5274	0	0	0	COG0071	NA	O	RecName: Full=18 kDa antigen 1; AltName: Full=18 kDa antigen clone MINTC73 gi|149912|gb|AAA25348.1| gene encodes an 18 kDa protein [Mycobacterium intracellulare] gi|298790|gb|AAB25883.1| 18 kda antigen-like protein {clone C73} [Mycobacterium intracel ...
M. shigaense_orf01908	1353638	1354009	+	123	236	0	0	0	COG0789	NA	K	hypothetical protein MAP3267c [Mycobacterium avium subsp. paratuberculosis K-10] gi|118466427|ref|YP_883254.1| MerR family transcriptional regulator [Mycobacterium avium 104] gi|417749005|ref|ZP_12397414.1| putative transcriptional regulator [Mycobac ...
M. shigaense_orf01910	1354526	1354086	-	146	113	0	0	0	NA	NOG239316	NA	hypothetical protein [Mycobacterium rhodesiae NBB3] gi|359820217|gb|AEV73030.1| hypothetical protein MycrhN_2442 [Mycobacterium rhodesiae NBB3]
M. shigaense_orf01911	1354732	1355346	+	204	175	0	0	0	NA	NOG245123;NOG146464	S	ANTAR domain-containing protein [Mycobacterium colombiense CECT 3035] gi|400330716|gb|EJO88213.1| ANTAR domain-containing protein [Mycobacterium colombiense CECT 3035]
M. shigaense_orf01913	1356513	1355359	-	384	51	0	0	0	NA	NA	NA	NAD(P)H-nitrite reductase [Mycobacterium chubuense NBB4] gi|390614494|gb|AFM15644.1| NAD(P)H-nitrite reductase [Mycobacterium chubuense NBB4]
M. shigaense_orf01916	1356594	1357796	+	400	63	0	0	0	COG1063	NA	R,E	hypothetical protein MAP3263c [Mycobacterium avium subsp. paratuberculosis K-10] gi|254776526|ref|ZP_05218042.1| hypothetical protein MaviaA2_17914 [Mycobacterium avium subsp. avium ATCC 25291] gi|417749009|ref|ZP_12397418.1| theronine dehydrogenase- ...
M. shigaense_orf01917	1357864	1360020	+	718	53	0	0	0	COG1523	NA	G	glycogen debranching enzyme GlgX [Mycobacterium parascrofulaceum ATCC BAA-614] gi|295896235|gb|EFG75897.1| glycogen debranching enzyme GlgX [Mycobacterium parascrofulaceum ATCC BAA-614]
M. shigaense_orf01920	1360209	1361933	+	574	68	1	0	0	NA	NA	NA	possible diguanylate cyclase with PAS/PAC sensor [Mycobacterium parascrofulaceum ATCC BAA-614] gi|295896236|gb|EFG75898.1| possible diguanylate cyclase with PAS/PAC sensor [Mycobacterium parascrofulaceum ATCC BAA-614]
M. shigaense_orf01921	1362059	1362841	+	260	103	0	0	0	COG1028	NA	I,Q,R	hypothetical protein MCOL_V214819 [Mycobacterium colombiense CECT 3035] gi|400330713|gb|EJO88210.1| hypothetical protein MCOL_V214819 [Mycobacterium colombiense CECT 3035]
M. shigaense_orf01922	1363798	1362827	-	323	139	0	0	0	COG0667	NA	C	hypothetical protein MCOL_V214814 [Mycobacterium colombiense CECT 3035] gi|400330712|gb|EJO88209.1| hypothetical protein MCOL_V214814 [Mycobacterium colombiense CECT 3035]
M. shigaense_orf01923	1364624	1364935	+	103	67	1	0	0	NA	NA	NA	NA
M. shigaense_orf01924	1364623	1363820	-	267	58	0	0	0	NA	NOG274989	NA	PknJ protein [Mycobacterium colombiense CECT 3035] gi|400330711|gb|EJO88208.1| PknJ protein [Mycobacterium colombiense CECT 3035]
M. shigaense_orf01925	1365272	1365799	+	175	103	0	0	0	NA	NOG117147	NA	hypothetical protein OCU_39310 [Mycobacterium intracellulare ATCC 13950] gi|379755946|ref|YP_005344618.1| hypothetical protein OCO_39340 [Mycobacterium intracellulare MOTT-02] gi|387877311|ref|YP_006307615.1| hypothetical protein W7S_19675 [Mycobacte ...
M. shigaense_orf01926	1367601	1365808	-	597	44	0	0	0	COG0028	NA	H,E	thiamine pyrophosphate protein [Mycobacterium colombiense CECT 3035] gi|400330707|gb|EJO88204.1| thiamine pyrophosphate protein [Mycobacterium colombiense CECT 3035]
M. shigaense_orf01927	1368022	1368192	+	56	56	0	0	0	NA	NA	NA	hypothetical protein MFORT_13363 [Mycobacterium fortuitum subsp. fortuitum DSM 46621] gi|403659067|gb|EJZ13741.1| hypothetical protein MFORT_13363 [Mycobacterium fortuitum subsp. fortuitum DSM 46621]
M. shigaense_orf01928	1368417	1368650	+	77	78	0	0	0	NA	NOG123864	NA	hypothetical protein MAV_4077 [Mycobacterium avium 104] gi|118166002|gb|ABK66899.1| hypothetical protein MAV_4077 [Mycobacterium avium 104]
M. shigaense_orf01930	1368824	1369132	+	102	59	0	0	0	NA	NA	NA	conserved hypothetical protein [Mycobacterium parascrofulaceum ATCC BAA-614] gi|295896194|gb|EFG75858.1| conserved hypothetical protein [Mycobacterium parascrofulaceum ATCC BAA-614]
M. shigaense_orf01931	1369900	1369136	-	254	62	0	1	0	NA	NOG120345	R	endonuclease/exonuclease/phosphatase [Mycobacterium parascrofulaceum ATCC BAA-614] gi|295896195|gb|EFG75859.1| endonuclease/exonuclease/phosphatase [Mycobacterium parascrofulaceum ATCC BAA-614]
M. shigaense_orf01935	1370534	1369905	-	209	43	0	0	0	NA	NA	NA	Nodulation protein S (NodS) [Mycobacterium chubuense NBB4] gi|390614349|gb|AFM15499.1| Nodulation protein S (NodS) [Mycobacterium chubuense NBB4]
M. shigaense_orf01936	1371304	1370531	-	257	49	0	0	0	NA	NA	NA	LmbE family protein [Mycobacterium parascrofulaceum ATCC BAA-614] gi|295896166|gb|EFG75831.1| LmbE family protein [Mycobacterium parascrofulaceum ATCC BAA-614]
M. shigaense_orf01938	1372256	1371312	-	314	53	0	1	0	NA	NOG79151	S	hypothetical protein OCO_39170 [Mycobacterium intracellulare MOTT-02] gi|378806145|gb|AFC50280.1| hypothetical protein OCO_39170 [Mycobacterium intracellulare MOTT-02]
M. shigaense_orf01939	1372933	1372253	-	226	63	0	0	0	NA	NA	NA	group 2 glycosyl transferase [Mycobacterium parascrofulaceum ATCC BAA-614] gi|295896168|gb|EFG75833.1| group 2 glycosyl transferase [Mycobacterium parascrofulaceum ATCC BAA-614]
M. shigaense_orf01940	1373069	1373644	+	191	76	0	1	0	NA	NOG41895	NA	hypothetical protein MintA_24340 [Mycobacterium intracellulare ATCC 13950] gi|379748632|ref|YP_005339453.1| hypothetical protein OCU_39130 [Mycobacterium intracellulare ATCC 13950] gi|379763471|ref|YP_005349868.1| hypothetical protein OCQ_40350 [Myco ...
M. shigaense_orf01941	1373911	1373645	-	88	123	0	0	0	NA	NOG132566	S	hypothetical protein MintA_24345 [Mycobacterium intracellulare ATCC 13950] gi|379748631|ref|YP_005339452.1| hypothetical protein OCU_39120 [Mycobacterium intracellulare ATCC 13950] gi|379755927|ref|YP_005344599.1| hypothetical protein OCO_39150 [Myco ...
M. shigaense_orf01943	1374102	1374287	+	61	45	0	0	0	NA	NA	NA	NA
M. shigaense_orf01944	1374280	1375035	+	251	51	0	0	0	NA	NOG41993	NA	hypothetical protein OCQ_40310 [Mycobacterium intracellulare MOTT-64] gi|406032178|ref|YP_006731070.1| stas domain-containing protein [Mycobacterium indicus pranii MTCC 9506] gi|378811409|gb|AFC55543.1| hypothetical protein OCQ_40310 [Mycobacterium i ...
M. shigaense_orf01945	1375091	1376935	+	614	70	0	0	0	COG1352	NA	T,N	CheR methyltransferase [Mycobacterium parascrofulaceum ATCC BAA-614] gi|295896173|gb|EFG75838.1| CheR methyltransferase [Mycobacterium parascrofulaceum ATCC BAA-614]
M. shigaense_orf01946	1377856	1376924	-	310	52	0	0	0	NA	NA	NA	hypothetical protein MCOL_V214709 [Mycobacterium colombiense CECT 3035] gi|400330691|gb|EJO88188.1| hypothetical protein MCOL_V214709 [Mycobacterium colombiense CECT 3035]
M. shigaense_orf01948	1378032	1379141	+	369	39	0	0	0	NA	NA	NA	group 1 glycosyl transferase [Mycobacterium parascrofulaceum ATCC BAA-614] gi|295896175|gb|EFG75840.1| group 1 glycosyl transferase [Mycobacterium parascrofulaceum ATCC BAA-614]
M. shigaense_orf01950	1379163	1380257	+	364	49	0	0	0	COG2207	NA	K	AraC family transcriptional regulator [Mycobacterium avium 104] gi|254776486|ref|ZP_05218002.1| transcriptional regulator, AraC family protein [Mycobacterium avium subsp. avium ATCC 25291] gi|118167293|gb|ABK68190.1| transcriptional regulator, AraC f ...
M. shigaense_orf01951	1380452	1380970	+	172	363	0	0	0	NA	NA	NA	stas domain protein [Mycobacterium parascrofulaceum ATCC BAA-614] gi|295896177|gb|EFG75842.1| stas domain protein [Mycobacterium parascrofulaceum ATCC BAA-614]
M. shigaense_orf01953	1381507	1381109	-	132	230	0	0	0	NA	NA	NA	hypothetical protein MintA_21634 [Mycobacterium intracellulare ATCC 13950] gi|443307104|ref|ZP_21036891.1| hypothetical protein W7U_15665 [Mycobacterium sp. H4Y] gi|442764472|gb|ELR82470.1| hypothetical protein W7U_15665 [Mycobacterium sp. H4Y]
M. shigaense_orf01955	1381832	1382266	+	144	92	0	0	0	NA	NOG120821	S	hypothetical protein MXEN_21477 [Mycobacterium xenopi RIVM700367] gi|383330248|gb|EID08779.1| hypothetical protein MXEN_21477 [Mycobacterium xenopi RIVM700367]
M. shigaense_orf01956	1382661	1382293	-	122	69	0	0	0	NA	NA	NA	membrane protein [Nocardia brasiliensis ATCC 700358] gi|407312288|gb|AFU06189.1| membrane protein [Nocardia brasiliensis ATCC 700358]
M. shigaense_orf01957	1382788	1382669	-	39	75	1	0	0	NA	NA	NA	NA
M. shigaense_orf01958	1382787	1383668	+	293	52	0	0	0	NA	NA	NA	DNA binding protein [Mycobacterium abscessus 47J26] gi|420931659|ref|ZP_15394934.1| putative DNA-binding protein [Mycobacterium massiliense 1S-151-0930] gi|420937709|ref|ZP_15400978.1| putative DNA-binding protein [Mycobacterium massiliense 1S-152-09 ...
M. shigaense_orf01959	1385078	1383684	-	464	44	0	0	0	COG1231	NA	E	monoamine oxidase [Mycobacterium colombiense CECT 3035] gi|400330688|gb|EJO88185.1| monoamine oxidase [Mycobacterium colombiense CECT 3035]
M. shigaense_orf01960	1385250	1386206	+	318	88	0	0	0	COG0596	NA	R	alpha/beta hydrolase [Mycobacterium tuberculosis CDC1551] gi|385992421|ref|YP_005910719.1| alpha/beta fold family hydrolase [Mycobacterium tuberculosis CCDC5180] gi|385996051|ref|YP_005914349.1| alpha/beta fold family hydrolase [Mycobacterium tubercu ...
M. shigaense_orf01963	1387544	1386201	-	447	110	0	0	0	COG1231	NA	E	amine oxidase [Mycobacterium parascrofulaceum ATCC BAA-614] gi|295896180|gb|EFG75845.1| amine oxidase [Mycobacterium parascrofulaceum ATCC BAA-614]
M. shigaense_orf01965	1387622	1388926	+	434	72	0	0	0	COG0477	NA	P,R,E,G	hypothetical protein MaviaA2_17689 [Mycobacterium avium subsp. avium ATCC 25291]
M. shigaense_orf01966	1388923	1390281	+	452	82	0	0	0	COG2141	NA	C	monooxygenase, NtaA/DszA family [Mycobacterium smegmatis MKD8] gi|440628648|gb|ELQ90444.1| monooxygenase, NtaA/DszA family [Mycobacterium smegmatis MKD8]
M. shigaense_orf01968	1391393	1390278	-	371	74	0	0	0	NA	NOG12693	S	hypothetical protein MCOL_V214669 [Mycobacterium colombiense CECT 3035] gi|400330683|gb|EJO88180.1| hypothetical protein MCOL_V214669 [Mycobacterium colombiense CECT 3035]
M. shigaense_orf01969	1392514	1391393	-	373	82	0	0	0	COG3173	NA	R	phosphotransferase enzyme family protein [Mycobacterium parascrofulaceum ATCC BAA-614] gi|295896182|gb|EFG75847.1| phosphotransferase enzyme family protein [Mycobacterium parascrofulaceum ATCC BAA-614]
M. shigaense_orf01970	1392586	1393188	+	200	84	0	0	0	COG1309	NA	K	transcriptional regulator, TetR family protein [Mycobacterium avium subsp. avium ATCC 25291]
M. shigaense_orf01972	1393185	1394060	+	291	68	0	0	0	COG1028	NOG121467	I,Q,R	oxidoreductase, short chain dehydrogenase/reductase [Mycobacterium avium subsp. paratuberculosis S5] gi|436720981|gb|ELP45167.1| oxidoreductase, short chain dehydrogenase/reductase [Mycobacterium avium subsp. paratuberculosis S5]
M. shigaense_orf01973	1394117	1394770	+	217	80	1	0	0	NA	NA	NA	putative O-methyltransferase [Rhodococcus sp. AW25M09] gi|443415462|emb|CCQ15374.1| putative O-methyltransferase [Rhodococcus sp. AW25M09]
M. shigaense_orf01974	1394840	1395817	+	325	49	0	0	0	NA	NA	NA	hypothetical protein MIP_05897 [Mycobacterium indicus pranii MTCC 9506] gi|405130715|gb|AFS15970.1| Hypothetical protein MIP_05897 [Mycobacterium indicus pranii MTCC 9506]
M. shigaense_orf01975	1395814	1396296	+	160	51	0	0	0	NA	NOG39320	NA	conserved hypothetical protein [Mycobacterium parascrofulaceum ATCC BAA-614] gi|295896152|gb|EFG75818.1| conserved hypothetical protein [Mycobacterium parascrofulaceum ATCC BAA-614]
M. shigaense_orf01976	1396293	1397282	+	329	55	0	0	0	COG0714	NA	R	moxR3 [Mycobacterium sp. H4Y] gi|442764442|gb|ELR82440.1| moxR3 [Mycobacterium sp. H4Y]
M. shigaense_orf01977	1397290	1398555	+	421	49	0	0	0	COG1721	NA	R	ATPase family protein [Mycobacterium parascrofulaceum ATCC BAA-614] gi|295896154|gb|EFG75820.1| ATPase family protein [Mycobacterium parascrofulaceum ATCC BAA-614]
M. shigaense_orf01978	1398570	1399007	+	145	83	0	0	0	NA	NOG78506	NA	conserved hypothetical protein [Mycobacterium parascrofulaceum ATCC BAA-614] gi|295896155|gb|EFG75821.1| conserved hypothetical protein [Mycobacterium parascrofulaceum ATCC BAA-614]
M. shigaense_orf01980	1400581	1399004	-	525	90	0	0	0	COG1007	NA	C	NADH dehydrogenase subunit N [Mycobacterium avium 104] gi|118168532|gb|ABK69429.1| NADH-quinone oxidoreductase chain n [Mycobacterium avium 104]
M. shigaense_orf01982	1402179	1400578	-	533	96	0	0	0	COG1008	NA	C	NADH:ubiquinone oxidoreductase subunit M [Mycobacterium sp. H4Y] gi|442764438|gb|ELR82436.1| NADH:ubiquinone oxidoreductase subunit M [Mycobacterium sp. H4Y]
M. shigaense_orf01984	1404120	1402231	-	629	108	0	0	0	COG1009	NA	P,C	NADH dehydrogenase I (chain L) nuoL (NADH-ubiquinone oxidoreductase chain L) [Mycobacterium tuberculosis C] gi|124599303|gb|EAY58407.1| NADH dehydrogenase I (chain L) nuoL (NADH-ubiquinone oxidoreductase chain L) [Mycobacterium tuberculosis C]
M. shigaense_orf01985	1405218	1404427	-	263	105	0	0	0	COG0839	NA	C	NADH dehydrogenase subunit J [Mycobacterium intracellulare MOTT-02] gi|406032159|ref|YP_006731051.1| protein NuoJ [Mycobacterium indicus pranii MTCC 9506] gi|378806122|gb|AFC50257.1| NADH dehydrogenase subunit J [Mycobacterium intracellulare MOTT-02] ...
M. shigaense_orf01986	1404430	1404131	-	99	103	0	0	0	COG0713	NA	C	NADH-quinone oxidoreductase subunit K [Mycobacterium parascrofulaceum ATCC BAA-614] gi|295896159|gb|EFG75825.1| NADH-quinone oxidoreductase subunit K [Mycobacterium parascrofulaceum ATCC BAA-614]
M. shigaense_orf01988	1405772	1405215	-	185	175	0	0	0	COG1143	NA	C	NADH dehydrogenase subunit I [Mycobacterium colombiense CECT 3035] gi|400330666|gb|EJO88163.1| NADH dehydrogenase subunit I [Mycobacterium colombiense CECT 3035]
M. shigaense_orf01989	1407048	1405765	-	427	105	0	0	0	COG1005	NA	C	NADH dehydrogenase subunit H [Mycobacterium intracellulare ATCC 13950] gi|379763443|ref|YP_005349840.1| NADH dehydrogenase subunit H [Mycobacterium intracellulare MOTT-64] gi|378800972|gb|AFC45108.1| NADH dehydrogenase subunit H [Mycobacterium intrac ...
M. shigaense_orf01992	1409468	1407045	-	807	104	0	0	0	COG1034	NA	C	NADH dehydrogenase subunit G [Mycobacterium intracellulare ATCC 13950] gi|378800971|gb|AFC45107.1| NADH dehydrogenase subunit G [Mycobacterium intracellulare ATCC 13950]
M. shigaense_orf01994	1410802	1409465	-	445	104	0	0	0	COG1894	NA	C	NADH dehydrogenase I subunit F [Mycobacterium marinum M] gi|443489894|ref|YP_007368041.1| NADH dehydrogenase I [Mycobacterium liflandii 128FXT] gi|183174819|gb|ACC39929.1| NADH dehydrogenase I (chain F) NuoF (NADH- ubiquinone oxidoreductase chain F) ...
M. shigaense_orf01996	1411581	1410799	-	260	107	0	0	0	COG1905	NA	C	NADH-quinone oxidoreductase subunit E [Mycobacterium parascrofulaceum ATCC BAA-614] gi|295896086|gb|EFG75753.1| NADH-quinone oxidoreductase subunit E [Mycobacterium parascrofulaceum ATCC BAA-614]
M. shigaense_orf01997	1412906	1411578	-	442	114	0	0	0	COG0649	NA	C	NADH dehydrogenase subunit D [Mycobacterium avium subsp. paratuberculosis K-10] gi|118466708|ref|YP_883188.1| NADH dehydrogenase subunit D [Mycobacterium avium 104] gi|254776458|ref|ZP_05217974.1| NADH dehydrogenase subunit D [Mycobacterium avium sub ...
M. shigaense_orf01998	1414185	1413631	-	184	207	0	0	0	COG0377	NA	C	NADH dehydrogenase subunit B [Mycobacterium intracellulare ATCC 13950] gi|379748602|ref|YP_005339423.1| NADH dehydrogenase subunit B [Mycobacterium intracellulare ATCC 13950] gi|379755898|ref|YP_005344570.1| NADH dehydrogenase subunit B [Mycobacteriu ...
M. shigaense_orf01999	1413634	1412906	-	242	97	0	0	0	COG0852	NA	C	NADH dehydrogenase subunit C [Mycobacterium marinum M] gi|443489897|ref|YP_007368044.1| NADH dehydrogenase I [Mycobacterium liflandii 128FXT] gi|218534290|sp|B2HGE6.1|NUOC_MYCMM RecName: Full=NADH-quinone oxidoreductase subunit C; AltName: Full=NADH ...
M. shigaense_orf02000	1414571	1414194	-	125	257	0	0	0	COG0838	NA	C	NADH-quinone oxidoreductase subunit A [Mycobacterium parascrofulaceum ATCC BAA-614] gi|295896090|gb|EFG75757.1| NADH-quinone oxidoreductase subunit A [Mycobacterium parascrofulaceum ATCC BAA-614]
M. shigaense_orf02001	1415757	1414780	-	325	44	0	0	0	COG0477	NA	P,R,E,G	Putative conserved integral membrane transport protein [Mycobacterium canettii CIPT 140070010] gi|432161894|emb|CCK59250.1| Putative conserved integral membrane transport protein [Mycobacterium canettii CIPT 140070010]
M. shigaense_orf02002	1416280	1415867	-	137	101	0	0	0	COG0784	NA	T	hypothetical protein MintA_14447 [Mycobacterium intracellulare ATCC 13950] gi|379748599|ref|YP_005339420.1| hypothetical protein OCU_38800 [Mycobacterium intracellulare ATCC 13950] gi|379755895|ref|YP_005344567.1| hypothetical protein OCO_38830 [Myco ...
M. shigaense_orf02003	1416741	1416310	-	143	78	0	0	0	COG2353	NA	S	hypothetical protein OCQ_39980 [Mycobacterium intracellulare MOTT-64] gi|378811376|gb|AFC55510.1| hypothetical protein OCQ_39980 [Mycobacterium intracellulare MOTT-64]
M. shigaense_orf02005	1417099	1416752	-	115	63	0	0	0	NA	NOG287340	NA	hypothetical protein Mmcs_1584 [Mycobacterium sp. MCS] gi|119867653|ref|YP_937605.1| hypothetical protein Mkms_1608 [Mycobacterium sp. KMS] gi|126434152|ref|YP_001069843.1| hypothetical protein Mjls_1554 [Mycobacterium sp. JLS] gi|108768973|gb|ABG076 ...
M. shigaense_orf02006	1418088	1417096	-	330	38	0	0	0	COG3173	NA	R	aminoglycoside phosphotransferase [Mycobacterium sp. H4Y] gi|442764422|gb|ELR82420.1| aminoglycoside phosphotransferase [Mycobacterium sp. H4Y]
M. shigaense_orf02007	1419323	1418085	-	412	53	0	0	0	COG1960	NA	I	FadE12_3 [Mycobacterium colombiense CECT 3035] gi|400330654|gb|EJO88151.1| FadE12_3 [Mycobacterium colombiense CECT 3035]
M. shigaense_orf02009	1420857	1419955	-	300	61	0	0	0	COG0119	NA	E	hypothetical protein W7S_19385 [Mycobacterium sp. MOTT36Y] gi|386790711|gb|AFJ36830.1| hypothetical protein W7S_19385 [Mycobacterium sp. MOTT36Y]
M. shigaense_orf02012	1419955	1419332	-	207	46	0	0	0	COG1309	NOG83213	K	TetR family transcriptional regulator [Mycobacterium avium 104] gi|118163583|gb|ABK64480.1| transcriptional regulator, TetR family protein [Mycobacterium avium 104]
M. shigaense_orf02013	1422111	1420906	-	401	55	0	0	0	COG1804	NA	C	hypothetical protein OCO_38760 [Mycobacterium intracellulare MOTT-02] gi|378806104|gb|AFC50239.1| hypothetical protein OCO_38760 [Mycobacterium intracellulare MOTT-02]
M. shigaense_orf02014	1423295	1422108	-	395	57	0	0	0	NA	NOG40459	S	hypothetical protein W7U_15380 [Mycobacterium sp. H4Y] gi|442764417|gb|ELR82415.1| hypothetical protein W7U_15380 [Mycobacterium sp. H4Y]
M. shigaense_orf02015	1424418	1423315	-	367	69	0	0	0	COG3508	NA	Q	dioxygenase [Mycobacterium indicus pranii MTCC 9506] gi|405130687|gb|AFS15942.1| Putative dioxygenase [Mycobacterium indicus pranii MTCC 9506]
M. shigaense_orf02016	1425477	1424521	-	318	70	0	0	0	COG0604	NA	C,R	oxidoreductase, zinc-binding dehydrogenase family protein [Mycobacterium intracellulare MOTT-02] gi|387877249|ref|YP_006307553.1| oxidoreductase, zinc-binding dehydrogenase family protein [Mycobacterium sp. MOTT36Y] gi|406032139|ref|YP_006731031.1| q ...
M. shigaense_orf02018	1426475	1425513	-	320	62	0	0	0	COG0604	NA	C,R	oxidoreductase [Mycobacterium marinum M] gi|183174840|gb|ACC39950.1| oxidoreductase [Mycobacterium marinum M]
M. shigaense_orf02019	1427784	1426576	-	402	66	0	0	1	COG1960	NA	I	acyl-CoA dehydrogenase FadE23 [Mycobacterium xenopi RIVM700367] gi|383335475|gb|EID13905.1| acyl-CoA dehydrogenase FadE23 [Mycobacterium xenopi RIVM700367]
M. shigaense_orf02020	1429219	1427810	-	469	56	0	0	1	COG1960	NA	I	FadE24 [Mycobacterium intracellulare ATCC 13950] gi|379748585|ref|YP_005339406.1| fadE24 [Mycobacterium intracellulare ATCC 13950] gi|379763421|ref|YP_005349818.1| fadE24 [Mycobacterium intracellulare MOTT-64] gi|406032135|ref|YP_006731027.1| acyl-Co ...
M. shigaense_orf02021	1430079	1429297	-	260	95	0	0	0	COG0483	NA	G	Putative monophosphatase [Mycobacterium canettii CIPT 140070017] gi|432167810|emb|CCK65332.1| Putative monophosphatase [Mycobacterium canettii CIPT 140070017]
M. shigaense_orf02022	1430543	1430115	-	142	176	0	0	0	NA	NOG15064	NA	hypothetical protein MAV_4009 [Mycobacterium avium 104] gi|254776431|ref|ZP_05217947.1| hypothetical protein MaviaA2_17429 [Mycobacterium avium subsp. avium ATCC 25291] gi|440778641|ref|ZP_20957397.1| hypothetical protein D522_18309 [Mycobacterium av ...
M. shigaense_orf02023	1430665	1430994	+	109	167	0	0	0	NA	NOG13179	NA	hypothetical protein MRGA327_19285 [Mycobacterium tuberculosis RGTB327] gi|380722832|gb|AFE17941.1| hypothetical protein MRGA327_19285 [Mycobacterium tuberculosis RGTB327]
M. shigaense_orf02026	1432476	1431112	-	454	98	0	0	0	COG0493	NA	R,E	ferredoxin-NADP reductase [Mycobacterium parascrofulaceum ATCC BAA-614] gi|295896112|gb|EFG75779.1| ferredoxin-NADP reductase [Mycobacterium parascrofulaceum ATCC BAA-614]
M. shigaense_orf02028	1432660	1433766	+	368	108	0	0	1	COG1186	NA	J	peptide chain release factor 2 [Mycobacterium vanbaalenii PYR-1] gi|166225112|sp|A1T6D1.1|RF2_MYCVP RecName: Full=Peptide chain release factor 2; Short=RF-2 gi|119955726|gb|ABM12731.1| bacterial peptide chain release factor 2 (bRF-2) [Mycobacterium v ...
M. shigaense_orf02029	1433774	1434742	+	322	69	0	0	0	COG0668	NA	M	hypothetical protein MintA_10636 [Mycobacterium intracellulare ATCC 13950] gi|379748573|ref|YP_005339394.1| hypothetical protein OCU_38540 [Mycobacterium intracellulare ATCC 13950] gi|379755869|ref|YP_005344541.1| hypothetical protein OCO_38570 [Myco ...
M. shigaense_orf02032	1434739	1435203	+	154	71	0	0	0	NA	NOG47631;NOG234351	S	hypothetical protein MAV_4004 [Mycobacterium avium 104] gi|118166692|gb|ABK67589.1| conserved hypothetical protein [Mycobacterium avium 104]
M. shigaense_orf02033	1435275	1435964	+	229	249	0	0	1	COG2884	NA	D	cell division ATP-binding protein FtsE [Mycobacterium colombiense CECT 3035] gi|400330630|gb|EJO88127.1| cell division ATP-binding protein FtsE [Mycobacterium colombiense CECT 3035]
M. shigaense_orf02035	1435965	1436858	+	297	179	0	0	0	COG2177	NA	D	cell division protein FtsX [Mycobacterium marinum M] gi|443489950|ref|YP_007368097.1| cell division protein FtsX [Mycobacterium liflandii 128FXT] gi|183174872|gb|ACC39982.1| cell division protein FtsX [Mycobacterium marinum M] gi|442582447|gb|AGC6159 ...
M. shigaense_orf02037	1436861	1437370	+	169	200	0	0	1	COG0691	NA	O	SsrA-binding protein [Mycobacterium colombiense CECT 3035] gi|400330628|gb|EJO88125.1| SsrA-binding protein [Mycobacterium colombiense CECT 3035]
M. shigaense_orf02038	1437448	1438212	+	254	100	0	1	0	NA	NOG282890;NOG86465	S	conserved hypothetical protein [Mycobacterium parascrofulaceum ATCC BAA-614] gi|295896119|gb|EFG75786.1| conserved hypothetical protein [Mycobacterium parascrofulaceum ATCC BAA-614]
M. shigaense_orf02039	1438248	1439093	+	281	84	0	0	0	NA	NOG14058	NA	hypothetical protein W7S_19235 [Mycobacterium sp. MOTT36Y] gi|443307022|ref|ZP_21036809.1| hypothetical protein W7U_15245 [Mycobacterium sp. H4Y] gi|386790681|gb|AFJ36800.1| hypothetical protein W7S_19235 [Mycobacterium sp. MOTT36Y] gi|442764390|gb|E ...
M. shigaense_orf02041	1440109	1439981	-	42	121	1	0	0	NA	NA	NA	NA
M. shigaense_orf02042	1443075	1440148	-	975	90	0	1	0	COG2409	NA	R	putative transport protein MmpL4 [Mycobacterium colombiense CECT 3035] gi|400330613|gb|EJO88110.1| putative transport protein MmpL4 [Mycobacterium colombiense CECT 3035]
M. shigaense_orf02043	1443458	1443072	-	128	222	0	1	0	NA	NA	NA	hypothetical protein MCOL_V214314 [Mycobacterium colombiense CECT 3035] gi|400330614|gb|EJO88111.1| hypothetical protein MCOL_V214314 [Mycobacterium colombiense CECT 3035]
M. shigaense_orf02044	1444568	1444227	-	113	441	0	0	0	NA	NA	NA	putative secreted protein [Mycobacterium liflandii 128FXT] gi|442584545|gb|AGC63688.1| putative secreted protein [Mycobacterium liflandii 128FXT]
M. shigaense_orf02045	1445109	1444789	-	106	52	1	0	0	NA	NA	NA	NA
M. shigaense_orf02047	1445444	1445677	+	77	231	0	0	0	NA	NA	NA	ferric uptake regulation protein [Mycobacterium parascrofulaceum ATCC BAA-614] gi|295896900|gb|EFG76528.1| ferric uptake regulation protein [Mycobacterium parascrofulaceum ATCC BAA-614]
M. shigaense_orf02048	1447178	1445772	-	468	74	1	0	0	COG2114	NA	T	family 3 adenylate cyclase [Bradyrhizobium sp. WSM471] gi|374420252|gb|EHQ99784.1| family 3 adenylate cyclase [Bradyrhizobium sp. WSM471]
M. shigaense_orf02049	1447499	1447359	-	46	60	0	0	0	NA	NA	NA	conserved hypothetical protein [Mycobacterium parascrofulaceum ATCC BAA-614] gi|295893865|gb|EFG73638.1| conserved hypothetical protein [Mycobacterium parascrofulaceum ATCC BAA-614]
M. shigaense_orf02050	1449323	1448109	-	404	44	1	0	0	NA	NA	NA	signal transduction histidine kinase [Mycobacterium chubuense NBB4] gi|390615973|gb|AFM17123.1| signal transduction histidine kinase [Mycobacterium chubuense NBB4]
M. shigaense_orf02051	1449709	1449335	-	124	54	1	0	0	NA	NA	NA	response regulator containing a CheY-like receiver domain and an HTH DNA-binding domain [Mycobacterium chubuense NBB4] gi|390615972|gb|AFM17122.1| response regulator containing a CheY-like receiver domain and an HTH DNA-binding domain [Mycobacterium ...
M. shigaense_orf02052	1450498	1449791	-	235	69	1	0	0	NA	NA	NA	response regulator containing a CheY-like receiver domain and an HTH DNA-binding domain [Mycobacterium chubuense NBB4] gi|390615971|gb|AFM17121.1| response regulator containing a CheY-like receiver domain and an HTH DNA-binding domain [Mycobacterium ...
M. shigaense_orf02053	1450714	1450830	+	38	40	1	0	0	NA	NA	NA	NA
M. shigaense_orf02054	1451585	1452982	+	465	34	0	0	0	COG1680	NA	V	penicillin-binding protein, beta-lactamase class C [Mycobacterium smegmatis JS623] gi|433295379|gb|AGB21199.1| penicillin-binding protein, beta-lactamase class C [Mycobacterium smegmatis JS623]
M. shigaense_orf02056	1453091	1454680	+	529	51	1	0	0	COG1032	NA	C	Radical SAM domain protein [Mycobacterium rhodesiae JS60] gi|353193486|gb|EHB58990.1| Radical SAM domain protein [Mycobacterium rhodesiae JS60]
M. shigaense_orf02057	1454677	1455399	+	240	47	0	0	0	NA	NA	NA	N-acetylmuramoyl-L-alanine amidase [Mycobacterium colombiense CECT 3035] gi|400330612|gb|EJO88109.1| N-acetylmuramoyl-L-alanine amidase [Mycobacterium colombiense CECT 3035]
M. shigaense_orf02059	1455540	1455653	+	37	41	1	0	0	NA	NA	NA	NA
M. shigaense_orf02060	1455644	1455781	+	45	48	1	0	0	NA	NA	NA	NA
M. shigaense_orf02061	1455789	1456109	+	106	62	0	0	0	NA	NA	NA	short-chain dehydrogenase/reductase SDR [Amycolatopsis mediterranei U32] gi|384152478|ref|YP_005535294.1| short-chain dehydrogenase/reductase SDR [Amycolatopsis mediterranei S699] gi|399540880|ref|YP_006553542.1| short-chain dehydrogenase/reductase S ...
M. shigaense_orf02062	1456994	1456074	-	306	66	0	0	0	NA	NA	NA	universal stress protein family protein [Mycobacterium parascrofulaceum ATCC BAA-614] gi|295896125|gb|EFG75792.1| universal stress protein family protein [Mycobacterium parascrofulaceum ATCC BAA-614]
M. shigaense_orf02064	1458294	1457152	-	380	75	0	0	0	COG4638	NA	P,R	Rieske (2Fe-2S) iron-sulfur domain protein [Mycobacterium tusciae JS617] gi|373545806|gb|EHP72604.1| Rieske (2Fe-2S) iron-sulfur domain protein [Mycobacterium tusciae JS617]
M. shigaense_orf02065	1458501	1459283	+	260	50	0	0	0	COG1024	NA	I	enoyl-CoA hydratase/carnithine racemase [Mycobacterium smegmatis JS623] gi|433296118|gb|AGB21938.1| enoyl-CoA hydratase/carnithine racemase [Mycobacterium smegmatis JS623]
M. shigaense_orf02066	1459434	1459568	+	44	67	1	0	0	NA	NA	NA	NA
M. shigaense_orf02067	1460284	1459583	-	233	66	0	0	0	COG1787	NA	V	restriction endonuclease [Mycobacterium parascrofulaceum ATCC BAA-614] gi|295894295|gb|EFG74050.1| restriction endonuclease [Mycobacterium parascrofulaceum ATCC BAA-614]
M. shigaense_orf02068	1459424	1459272	-	50	67	0	0	0	NA	NA	NA	AMP-dependent synthetase and ligase [Mycobacterium sp. MCS] gi|119868744|ref|YP_938696.1| AMP-dependent synthetase and ligase [Mycobacterium sp. KMS] gi|108770052|gb|ABG08774.1| AMP-dependent synthetase and ligase [Mycobacterium sp. MCS] gi|119694833 ...
M. shigaense_orf02069	1460719	1460597	-	40	94	1	0	0	NA	NA	NA	NA
M. shigaense_orf02070	1460756	1461007	+	83	60	0	0	0	NA	NA	NA	hypothetical protein MXEN_10179 [Mycobacterium xenopi RIVM700367] gi|383335612|gb|EID14042.1| hypothetical protein MXEN_10179 [Mycobacterium xenopi RIVM700367]
M. shigaense_orf02073	1462838	1461060	-	592	54	0	0	0	COG1226	NA	P	TrkA domain-containing protein [Mycobacterium avium 104] gi|118167289|gb|ABK68186.1| TrkA-N domain family protein [Mycobacterium avium 104]
M. shigaense_orf02074	1463093	1464529	+	478	50	0	0	0	COG0174	NA	E	glutamine synthetase GlnA1 [Mycobacterium marinum M] gi|183176605|gb|ACC41715.1| glutamine synthetase GlnA1 [Mycobacterium marinum M]
M. shigaense_orf02075	1464531	1464689	+	52	69	1	0	0	NA	NA	NA	NA
M. shigaense_orf02076	1465152	1464709	-	147	71	0	0	0	COG0784	NA	T	Response regulator rcp1 [Mycobacterium indicus pranii MTCC 9506] gi|405130906|gb|AFS16161.1| Response regulator rcp1 [Mycobacterium indicus pranii MTCC 9506]
M. shigaense_orf02077	1465551	1465402	-	49	131	0	0	0	NA	NA	NA	NA
M. shigaense_orf02078	1465762	1467798	+	678	54	0	0	0	NA	NOG70532	S	hypothetical protein OCO_03200 [Mycobacterium intracellulare MOTT-02] gi|378802549|gb|AFC46684.1| hypothetical protein OCO_03200 [Mycobacterium intracellulare MOTT-02]
M. shigaense_orf02079	1468443	1467802	-	213	69	0	0	0	NA	NA	NA	hypothetical protein MMAR_1570 [Mycobacterium marinum M] gi|183174912|gb|ACC40022.1| conserved hypothetical secreted protein [Mycobacterium marinum M]
M. shigaense_orf02081	1468537	1468932	+	131	58	0	0	0	NA	NA	NA	hypothetical protein OCU_38220 [Mycobacterium intracellulare ATCC 13950] gi|378800905|gb|AFC45041.1| hypothetical protein OCU_38220 [Mycobacterium intracellulare ATCC 13950]
M. shigaense_orf02082	1470472	1470684	+	70	75	0	0	0	NA	NA	NA	hypothetical protein MXEN_16777 [Mycobacterium xenopi RIVM700367] gi|383332835|gb|EID11310.1| hypothetical protein MXEN_16777 [Mycobacterium xenopi RIVM700367]
M. shigaense_orf02083	1470441	1468942	-	499	57	0	0	0	NA	NA	NA	FAD-dependent pyridine nucleotide-disulfide oxidoreductase [Mycobacterium tusciae JS617] gi|373548121|gb|EHP74824.1| FAD-dependent pyridine nucleotide-disulfide oxidoreductase [Mycobacterium tusciae JS617]
M. shigaense_orf02084	1472150	1470687	-	487	97	0	0	0	COG0397	NA	S	hypothetical protein MAP3154 [Mycobacterium avium subsp. paratuberculosis K-10] gi|440778620|ref|ZP_20957376.1| hypothetical protein D522_18184 [Mycobacterium avium subsp. paratuberculosis S5] gi|81413402|sp|Q73V62.1|Y3154_MYCPA RecName: Full=UPF0061 ...
M. shigaense_orf02085	1472744	1472178	-	188	81	0	0	0	COG5592	NOG117147	S	hemerythrin HHE cation binding domain-containing protein [Mycobacterium intracellulare ATCC 13950] gi|379748538|ref|YP_005339359.1| hemerythrin HHE cation binding domain-containing protein [Mycobacterium intracellulare ATCC 13950] gi|379755823|ref|YP ...
M. shigaense_orf02086	1472923	1473549	+	208	57	0	0	0	COG1670	NA	J	hypothetical protein OCQ_39290 [Mycobacterium intracellulare MOTT-64] gi|387877189|ref|YP_006307493.1| hypothetical protein W7S_19065 [Mycobacterium sp. MOTT36Y] gi|406032074|ref|YP_006730966.1| Lysine N-acyltransferase mbtK [Mycobacterium indicus pr ...
M. shigaense_orf02087	1474759	1473671	-	362	43	0	0	0	COG1993	NA	S	Conserved hypothetical protein [Mycobacterium tuberculosis H37Rv] gi|31794250|ref|NP_856743.1| hypothetical protein Mb3098 [Mycobacterium bovis AF2122/97] gi|121638956|ref|YP_979180.1| hypothetical protein BCG_3096 [Mycobacterium bovis BCG str. Paste ...
M. shigaense_orf02088	1475124	1474756	-	122	45	0	0	0	COG0239	NA	D	CrcB-like protein [Mycobacterium rhodesiae JS60] gi|353193586|gb|EHB59090.1| CrcB-like protein [Mycobacterium rhodesiae JS60]
M. shigaense_orf02089	1475519	1475121	-	132	62	0	0	0	COG0239	NA	D	camphor resistance protein CrcB [Mycobacterium avium subsp. paratuberculosis K-10] gi|417749211|ref|ZP_12397615.1| Integral membrane protein possibly involved in chromosome condensation [Mycobacterium avium subsp. paratuberculosis S397] gi|440778611| ...
M. shigaense_orf02091	1475654	1477282	+	542	61	0	0	0	COG0033	NA	G	phosphoglucomutase [Mycobacterium parascrofulaceum ATCC BAA-614] gi|295896081|gb|EFG75749.1| phosphoglucomutase [Mycobacterium parascrofulaceum ATCC BAA-614]
M. shigaense_orf02092	1477375	1478556	+	393	54	0	1	0	COG0477	NOG246643	P,K,R,E,G	permease of the major facilitator superfamily protein [Mycobacterium colombiense CECT 3035] gi|400330575|gb|EJO88072.1| permease of the major facilitator superfamily protein [Mycobacterium colombiense CECT 3035]
M. shigaense_orf02093	1479121	1478951	-	56	86	1	0	0	NA	NA	NA	NA
M. shigaense_orf02094	1479332	1479445	+	37	76	1	0	0	NA	NA	NA	NA
M. shigaense_orf02095	1479574	1481250	+	558	183	1	0	0	NA	NA	NA	ABC transporter related protein [Ktedonobacter racemifer DSM 44963] gi|297555454|gb|EFH89318.1| ABC transporter related protein [Ktedonobacter racemifer DSM 44963]
M. shigaense_orf02096	1481773	1481928	+	51	73	1	0	0	NA	NA	NA	NA
M. shigaense_orf02097	1481941	1483077	+	378	63	0	0	0	NA	NA	NA	O-demethylpuromycin-O-methyltransferase [Mycobacterium fortuitum subsp. fortuitum DSM 46621] gi|403650860|gb|EJZ06049.1| O-demethylpuromycin-O-methyltransferase [Mycobacterium fortuitum subsp. fortuitum DSM 46621]
M. shigaense_orf02098	1483095	1483250	+	51	51	1	0	0	NA	NA	NA	NA
M. shigaense_orf02101	1483319	1485526	+	735	48	0	0	0	COG2409	NA	R	polyprenyl synthetase [Mycobacterium vanbaalenii PYR-1] gi|119955402|gb|ABM12407.1| Polyprenyl synthetase [Mycobacterium vanbaalenii PYR-1]
M. shigaense_orf02102	1485650	1486741	+	363	54	0	0	0	COG0142	NA	H	geranylgeranyl pyrophosphate synthase [Mycobacterium chubuense NBB4] gi|390614837|gb|AFM15987.1| geranylgeranyl pyrophosphate synthase [Mycobacterium chubuense NBB4]
M. shigaense_orf02103	1486913	1486764	-	49	85	1	0	0	NA	NA	NA	NA
M. shigaense_orf02104	1488869	1488621	-	82	144	0	0	0	NA	NA	NA	transcriptional regulatory protein [Mycobacterium smegmatis str. MC2 155] gi|441213843|ref|ZP_20975975.1| putative transcriptional regulatory protein [Mycobacterium smegmatis MKD8] gi|118172503|gb|ABK73399.1| probable transcriptional regulatory prote ...
M. shigaense_orf02105	1488627	1486885	-	580	54	0	0	0	NA	NOG44540	G	hypothetical protein W7S_05010 [Mycobacterium sp. MOTT36Y] gi|443304340|ref|ZP_21034128.1| hypothetical protein W7U_01620 [Mycobacterium sp. H4Y] gi|386787866|gb|AFJ33985.1| hypothetical protein W7S_05010 [Mycobacterium sp. MOTT36Y] gi|442765904|gb|E ...
M. shigaense_orf02106	1489610	1490695	+	361	70	0	0	0	COG0500	NA	Q,R	O-methyltransferase [Mycobacterium parascrofulaceum ATCC BAA-614] gi|295899680|gb|EFG79131.1| O-methyltransferase [Mycobacterium parascrofulaceum ATCC BAA-614]
M. shigaense_orf02107	1491317	1490703	-	204	59	0	0	0	NA	NOG283664	NA	TetR family transcriptional regulator [Mycobacterium sp. MOTT36Y] gi|443304413|ref|ZP_21034201.1| TetR family transcriptional regulator [Mycobacterium sp. H4Y] gi|386787939|gb|AFJ34058.1| TetR family transcriptional regulator [Mycobacterium sp. MOTT3 ...
M. shigaense_orf02109	1491476	1492693	+	405	58	0	0	0	COG5651	NA	N	PPE family protein [Mycobacterium parascrofulaceum ATCC BAA-614] gi|295896906|gb|EFG76534.1| PPE family protein [Mycobacterium parascrofulaceum ATCC BAA-614]
M. shigaense_orf02110	1492802	1493002	+	66	97	0	0	0	NA	NOG290645	NA	integral membrane protein [Mycobacterium xenopi RIVM700367] gi|383334709|gb|EID13146.1| integral membrane protein [Mycobacterium xenopi RIVM700367]
M. shigaense_orf02113	1494534	1493011	-	507	65	0	0	0	COG2041	NA	R	membrane-bound oxidoreductase [Mycobacterium marinum M] gi|183176366|gb|ACC41476.1| conserved membrane-bound oxidoreductase [Mycobacterium marinum M]
M. shigaense_orf02115	1495408	1494554	-	284	75	0	0	0	NA	NA	NA	Pyridoxamine 5''-phosphate oxidase [Mycobacterium colombiense CECT 3035] gi|400332656|gb|EJO90151.1| Pyridoxamine 5''-phosphate oxidase [Mycobacterium colombiense CECT 3035]
M. shigaense_orf02117	1498268	1495443	-	941	58	0	0	0	COG2409	NA	R	hypothetical protein MCOL_V213909 [Mycobacterium colombiense CECT 3035] gi|400330533|gb|EJO88030.1| hypothetical protein MCOL_V213909 [Mycobacterium colombiense CECT 3035]
M. shigaense_orf02118	1498678	1498265	-	137	96	0	0	0	NA	NA	NA	membrane protein MmpS [Mycobacterium colombiense CECT 3035] gi|400330532|gb|EJO88029.1| membrane protein MmpS [Mycobacterium colombiense CECT 3035]
M. shigaense_orf02119	1499243	1498839	-	134	84	0	0	0	NA	NA	NA	hypothetical protein MCOL_V213899 [Mycobacterium colombiense CECT 3035] gi|400330531|gb|EJO88028.1| hypothetical protein MCOL_V213899 [Mycobacterium colombiense CECT 3035]
M. shigaense_orf02120	1499419	1499793	+	124	53	0	0	0	COG4308	NA	Q	limonene-1,2-epoxide hydrolase [Mycobacterium smegmatis JS623] gi|433299408|gb|AGB25228.1| limonene-1,2-epoxide hydrolase [Mycobacterium smegmatis JS623]
M. shigaense_orf02121	1499864	1499995	+	43	49	1	0	0	NA	NA	NA	hypothetical protein MFORT_26529 [Mycobacterium fortuitum subsp. fortuitum DSM 46621] gi|403652135|gb|EJZ07203.1| hypothetical protein MFORT_26529 [Mycobacterium fortuitum subsp. fortuitum DSM 46621]
M. shigaense_orf02122	1500046	1500180	+	44	58	1	0	0	NA	NA	NA	NA
M. shigaense_orf02123	1500202	1500963	+	253	56	0	0	0	COG1028	NA	I,Q,R	putative acyl-CoA dehydrogenase [Mycobacterium colombiense CECT 3035] gi|400332729|gb|EJO90224.1| putative acyl-CoA dehydrogenase [Mycobacterium colombiense CECT 3035]
M. shigaense_orf02125	1501040	1501393	+	117	85	0	0	0	NA	NOG135579	NA	hypothetical protein GOPIP_091_00130 [Gordonia polyisoprenivorans NBRC 16320] gi|359313134|dbj|GAB26020.1| hypothetical protein GOPIP_091_00130 [Gordonia polyisoprenivorans NBRC 16320]
M. shigaense_orf02126	1501934	1501401	-	177	65	1	0	0	NA	NA	NA	NA
M. shigaense_orf02127	1502126	1502932	+	268	40	0	0	0	NA	NA	NA	2,4-dienoyl-CoA reductase (NADPH) [Mycobacterium parascrofulaceum ATCC BAA-614] gi|295894343|gb|EFG74096.1| 2,4-dienoyl-CoA reductase (NADPH) [Mycobacterium parascrofulaceum ATCC BAA-614]
M. shigaense_orf02128	1503069	1503275	+	68	87	0	0	0	NA	NA	NA	hypothetical protein MAPs_05080 [Mycobacterium avium subsp. paratuberculosis S397] gi|336459206|gb|EGO38151.1| hypothetical protein MAPs_05080 [Mycobacterium avium subsp. paratuberculosis S397]
M. shigaense_orf02130	1505826	1503304	-	840	45	0	0	0	COG0058	NA	G	glycogen phosphorylase [Mycobacterium parascrofulaceum ATCC BAA-614] gi|295894344|gb|EFG74097.1| glycogen phosphorylase [Mycobacterium parascrofulaceum ATCC BAA-614]
M. shigaense_orf02131	1506834	1506124	-	236	39	0	0	0	NA	NOG41799	S	Conserved protein of unknown function [Mycobacterium canettii CIPT 140070010] gi|432161967|emb|CCK59326.1| Conserved protein of unknown function [Mycobacterium canettii CIPT 140070010]
M. shigaense_orf02132	1507353	1507003	-	116	80	0	0	0	COG2076	NA	P	transporter, small multidrug resistance (SMR) family protein [Mycobacterium avium 104] gi|118163651|gb|ABK64548.1| transporter, small multidrug resistance (SMR) family protein [Mycobacterium avium 104]
M. shigaense_orf02133	1507711	1507379	-	110	35	0	0	0	NA	NOG13746	R	hypothetical protein MMAR_1613 [Mycobacterium marinum M] gi|443490040|ref|YP_007368187.1| hypothetical protein MULP_01757 [Mycobacterium liflandii 128FXT] gi|183174954|gb|ACC40064.1| conserved hypothetical protein [Mycobacterium marinum M] gi|4425825 ...
M. shigaense_orf02134	1507730	1508338	+	202	43	1	0	0	NA	NA	NA	phosphotransferase enzyme family protein [Mycobacterium colombiense CECT 3035] gi|400330522|gb|EJO88019.1| phosphotransferase enzyme family protein [Mycobacterium colombiense CECT 3035]
M. shigaense_orf02135	1508608	1508351	-	85	102	0	0	0	NA	NA	NA	conserved hypothetical protein [Mycobacterium parascrofulaceum ATCC BAA-614] gi|295900059|gb|EFG79497.1| conserved hypothetical protein [Mycobacterium parascrofulaceum ATCC BAA-614]
M. shigaense_orf02136	1508786	1509475	+	229	63	0	1	0	NA	NOG117393	NA	conserved hypothetical protein [Mycobacterium parascrofulaceum ATCC BAA-614] gi|295894351|gb|EFG74104.1| conserved hypothetical protein [Mycobacterium parascrofulaceum ATCC BAA-614]
M. shigaense_orf02137	1510350	1509523	-	275	51	0	0	0	COG1028	NA	I,Q,R	short-chain dehydrogenase of unknown substrate specificity [Mycobacterium smegmatis JS623] gi|433296268|gb|AGB22088.1| short-chain dehydrogenase of unknown substrate specificity [Mycobacterium smegmatis JS623]
M. shigaense_orf02139	1511903	1510383	-	506	63	0	0	0	COG0443	NA	O	chaperone HscA [Mycobacterium parascrofulaceum ATCC BAA-614] gi|295894370|gb|EFG74123.1| chaperone HscA [Mycobacterium parascrofulaceum ATCC BAA-614]
M. shigaense_orf02140	1512083	1512478	+	131	66	0	0	0	NA	NA	NA	conserved hypothetical protein [Mycobacterium parascrofulaceum ATCC BAA-614] gi|295894372|gb|EFG74125.1| conserved hypothetical protein [Mycobacterium parascrofulaceum ATCC BAA-614]
M. shigaense_orf02142	1514754	1512496	-	752	61	0	0	0	COG1966	NA	T	carbon starvation protein A [Mycobacterium colombiense CECT 3035] gi|400330511|gb|EJO88008.1| carbon starvation protein A [Mycobacterium colombiense CECT 3035]
M. shigaense_orf02145	1516386	1514803	-	527	75	0	0	0	COG1793	NA	L	ATP-dependent DNA ligase [Mycobacterium colombiense CECT 3035] gi|400330509|gb|EJO88006.1| ATP-dependent DNA ligase [Mycobacterium colombiense CECT 3035]
M. shigaense_orf02146	1516444	1517232	+	262	88	0	0	0	COG1028	NA	I,Q,R	short-chain type dehydrogenase/reductase [Mycobacterium colombiense CECT 3035] gi|400330508|gb|EJO88005.1| short-chain type dehydrogenase/reductase [Mycobacterium colombiense CECT 3035]
M. shigaense_orf02147	1517370	1519547	+	725	141	0	0	0	COG1960	NA	I	putative acyl-CoA dehydrogenase [Mycobacterium colombiense CECT 3035] gi|400330507|gb|EJO88004.1| putative acyl-CoA dehydrogenase [Mycobacterium colombiense CECT 3035]
M. shigaense_orf02149	1519812	1519654	-	52	120	0	0	0	NA	NA	NA	hypothetical protein MULP_01778 [Mycobacterium liflandii 128FXT] gi|442582555|gb|AGC61698.1| hypothetical protein MULP_01778 [Mycobacterium liflandii 128FXT]
M. shigaense_orf02150	1520060	1521259	+	399	105	0	0	0	COG0183	NA	I	hypothetical protein MintA_12621 [Mycobacterium intracellulare ATCC 13950]
M. shigaense_orf02151	1521284	1522735	+	483	43	0	0	0	COG2186	NA	K	GntR family transcriptional regulator [Mycobacterium parascrofulaceum ATCC BAA-614] gi|295894277|gb|EFG74032.1| GntR family transcriptional regulator [Mycobacterium parascrofulaceum ATCC BAA-614]
M. shigaense_orf02152	1522884	1523879	+	331	66	0	0	0	NA	NOG40138	R	regulator of Sig8 [Mycobacterium parascrofulaceum ATCC BAA-614] gi|295894278|gb|EFG74033.1| regulator of Sig8 [Mycobacterium parascrofulaceum ATCC BAA-614]
M. shigaense_orf02154	1524114	1523923	-	63	36	1	0	0	NA	NA	NA	NA
M. shigaense_orf02155	1524591	1525355	+	254	67	1	0	0	NA	NA	NA	prolipoprotein diacylglyceryl transferase [Desulfotomaculum ruminis DSM 2154] gi|334093016|gb|AEG61356.1| prolipoprotein diacylglyceryl transferase [Desulfotomaculum ruminis DSM 2154]
M. shigaense_orf02156	1525663	1525415	-	82	98	1	0	0	NA	NA	NA	NA
M. shigaense_orf02159	1525994	1525842	-	50	66	1	0	0	NA	NA	NA	NA
M. shigaense_orf02160	1526448	1526266	-	60	55	1	0	0	NA	NA	NA	NA
M. shigaense_orf02162	1526922	1527317	+	131	98	0	0	0	NA	NOG26350	NA	hypothetical protein MULP_01783 [Mycobacterium liflandii 128FXT] gi|442582560|gb|AGC61703.1| hypothetical protein MULP_01783 [Mycobacterium liflandii 128FXT]
M. shigaense_orf02163	1528805	1527324	-	493	107	0	0	0	COG2124	NA	Q	cytochrome P450 [Mycobacterium chubuense NBB4] gi|390615414|gb|AFM16564.1| cytochrome P450 [Mycobacterium chubuense NBB4]
M. shigaense_orf02164	1528924	1529574	+	216	75	0	0	0	COG1309	NOG73426;NOG268534	K	TetR family transcriptional regulator [Mycobacterium avium 104] gi|118166400|gb|ABK67297.1| transcriptional regulator, TetR family protein [Mycobacterium avium 104]
M. shigaense_orf02167	1529616	1530521	+	301	103	0	0	0	COG1028	NA	I,Q,R	short chain dehydrogenase [Mycobacterium colombiense CECT 3035] gi|400330159|gb|EJO87658.1| short chain dehydrogenase [Mycobacterium colombiense CECT 3035]
M. shigaense_orf02168	1531517	1530483	-	344	65	0	0	0	COG0389	NA	L	DNA polymerase IV [Mycobacterium rhodesiae JS60] gi|353193830|gb|EHB59334.1| DNA polymerase IV [Mycobacterium rhodesiae JS60]
M. shigaense_orf02169	1532125	1531514	-	203	68	0	0	0	NA	NOG117608	K	TetR family transcriptional regulator [Mycobacterium marinum M] gi|443490067|ref|YP_007368214.1| TetR family transcriptional regulator [Mycobacterium liflandii 128FXT] gi|183174977|gb|ACC40087.1| transcriptional regulatory protein (TetR- family) [Myc ...
M. shigaense_orf02170	1532217	1532774	+	185	191	0	0	0	COG0431	NA	R	hypothetical protein MMAR_1638 [Mycobacterium marinum M] gi|183174978|gb|ACC40088.1| conserved hypothetical protein [Mycobacterium marinum M]
M. shigaense_orf02172	1533279	1533518	+	79	531	0	0	0	COG0695	NA	O	glutaredoxin [Mycobacterium intracellulare ATCC 13950] gi|379748476|ref|YP_005339297.1| glutaredoxin [Mycobacterium intracellulare ATCC 13950] gi|379755760|ref|YP_005344432.1| glutaredoxin [Mycobacterium intracellulare MOTT-02] gi|379763307|ref|YP_00 ...
M. shigaense_orf02173	1533547	1533996	+	149	246	0	0	0	COG1780	NA	F	ribonucleoside-diphosphate reductase 2, operon protein nrdI [Mycobacterium rhodesiae NBB3] gi|359823651|gb|AEV76464.1| ribonucleoside-diphosphate reductase 2, operon protein nrdI [Mycobacterium rhodesiae NBB3]
M. shigaense_orf02174	1533963	1536131	+	722	136	0	0	0	COG0209	NA	F	ribonucleoside-diphosphate reductase class Ib alpha subunit [Mycobacterium smegmatis JS623] gi|433296704|gb|AGB22524.1| ribonucleoside-diphosphate reductase class Ib alpha subunit [Mycobacterium smegmatis JS623]
M. shigaense_orf02175	1536464	1536150	-	104	138	1	0	0	NA	NA	NA	merR family transcriptional regulator [Streptomyces griseoaurantiacus M045] gi|329300348|gb|EGG44245.1| merR family transcriptional regulator [Streptomyces griseoaurantiacus M045]
M. shigaense_orf02176	1536594	1537649	+	351	46	1	0	0	NA	NA	NA	putative dihydroflavonol-4-reductase [Cystobacter fuscus] gi|444720451|gb|ELW61235.1| putative dihydroflavonol-4-reductase [Cystobacter fuscus DSM 2262]
M. shigaense_orf02178	1537763	1538512	+	249	102	0	0	0	COG1309	NA	K	conserved hypothetical protein [Mycobacterium tuberculosis 94_M4241A] gi|308406042|ref|ZP_07494895.2| transcriptional regulator, asnC-family [Mycobacterium tuberculosis SUMu012] gi|422814123|ref|ZP_16862488.1| transcriptional regulator [Mycobacterium ...
M. shigaense_orf02180	1538671	1540236	+	521	222	0	0	0	COG2072	NA	P	flavin-containing monooxygenase FMO [Mycobacterium intracellulare ATCC 13950] gi|379763301|ref|YP_005349698.1| flavin-containing monooxygenase FMO [Mycobacterium intracellulare MOTT-64] gi|387877126|ref|YP_006307430.1| flavin-containing monooxygenase ...
M. shigaense_orf02182	1540266	1540724	+	152	175	0	0	0	COG0589	NA	T	UspA domain-containing protein [Mycobacterium intracellulare ATCC 13950] gi|379748469|ref|YP_005339290.1| UspA domain-containing protein [Mycobacterium intracellulare ATCC 13950] gi|379763300|ref|YP_005349697.1| UspA domain-containing protein [Mycoba ...
M. shigaense_orf02183	1541656	1540727	-	309	87	0	0	0	NA	NA	NA	short-chain dehydrogenase/reductase SDR [Mycobacterium colombiense CECT 3035] gi|400330148|gb|EJO87647.1| short-chain dehydrogenase/reductase SDR [Mycobacterium colombiense CECT 3035]
M. shigaense_orf02184	1541760	1542329	+	189	60	0	0	0	NA	NA	NA	transcriptional regulator [Mycobacterium colombiense CECT 3035] gi|400330147|gb|EJO87646.1| transcriptional regulator [Mycobacterium colombiense CECT 3035]
M. shigaense_orf02185	1542849	1542304	-	181	42	0	0	0	NA	NOG250665	U	hypothetical protein MCOL_V222156 [Mycobacterium colombiense CECT 3035] gi|400330146|gb|EJO87645.1| hypothetical protein MCOL_V222156 [Mycobacterium colombiense CECT 3035]
M. shigaense_orf02186	1543279	1542833	-	148	57	0	1	0	NA	NOG240785;NOG119339	S	hypothetical protein MAV_3914 [Mycobacterium avium 104] gi|417749270|ref|ZP_12397674.1| Polyketide cyclase / dehydrase and lipid transport [Mycobacterium avium subsp. paratuberculosis S397] gi|118168443|gb|ABK69340.1| conserved hypothetical protein [ ...
M. shigaense_orf02187	1544897	1543320	-	525	59	0	0	0	NA	NA	NA	FAD dependent oxidoreductase [Mycobacterium sp. JLS] gi|126237253|gb|ABO00654.1| FAD dependent oxidoreductase [Mycobacterium sp. JLS]
M. shigaense_orf02188	1544990	1545592	+	200	54	0	0	0	NA	NA	NA	TetR family transcriptional regulator [Mycobacterium xenopi RIVM700367] gi|383337585|gb|EID15961.1| TetR family transcriptional regulator [Mycobacterium xenopi RIVM700367]
M. shigaense_orf02190	1545663	1546805	+	380	60	1	0	0	COG1063	NA	R,E	Alcohol dehydrogenase GroES domain protein [bacterium Ellin514] gi|223891320|gb|EEF57815.1| Alcohol dehydrogenase GroES domain protein [bacterium Ellin514]
M. shigaense_orf02192	1546962	1547936	+	324	129	0	0	0	COG0208	NA	F	ribonucleotide-diphosphate reductase subunit beta [Mycobacterium intracellulare ATCC 13950] gi|379748466|ref|YP_005339287.1| ribonucleotide-diphosphate reductase subunit beta [Mycobacterium intracellulare ATCC 13950] gi|379755750|ref|YP_005344422.1| ...
M. shigaense_orf02193	1547975	1548463	+	162	90	0	0	0	NA	NA	NA	NA
M. shigaense_orf02194	1548615	1548908	+	97	213	0	0	0	NA	NA	NA	hypothetical protein MXEN_04468 [Mycobacterium xenopi RIVM700367] gi|383337971|gb|EID16344.1| hypothetical protein MXEN_04468 [Mycobacterium xenopi RIVM700367]
M. shigaense_orf02195	1548955	1550031	+	358	440	0	0	0	COG2801	NA	L	integrase catalytic subunit [Mycobacterium sp. MCS] gi|108769040|gb|ABG07762.1| Integrase, catalytic region [Mycobacterium sp. MCS]
M. shigaense_orf02196	1550438	1550061	-	125	58	0	0	0	NA	NA	NA	Probable phosphate-transport system transcriptional regulatory protein PhoY2 [Mycobacterium tuberculosis H37Rv] gi|15840234|ref|NP_335271.1| phosphate transport system regulatory protein [Mycobacterium tuberculosis CDC1551] gi|31792009|ref|NP_854502. ...
M. shigaense_orf02197	1550444	1550605	+	53	80	1	0	0	NA	NA	NA	NA
M. shigaense_orf02198	1550638	1550946	+	102	129	0	0	0	NA	NA	NA	hypothetical protein MXEN_04468 [Mycobacterium xenopi RIVM700367] gi|383337971|gb|EID16344.1| hypothetical protein MXEN_04468 [Mycobacterium xenopi RIVM700367]
M. shigaense_orf02200	1551057	1551470	+	137	271	0	0	0	NA	NOG38832	NA	hypothetical protein MCOL_V222136 [Mycobacterium colombiense CECT 3035] gi|400330142|gb|EJO87641.1| hypothetical protein MCOL_V222136 [Mycobacterium colombiense CECT 3035]
M. shigaense_orf02201	1552499	1551459	-	346	216	0	0	0	COG1064	NA	R	NADP-dependent alcohol dehydrogenase [Mycobacterium parascrofulaceum ATCC BAA-614] gi|295894297|gb|EFG74052.1| NADP-dependent alcohol dehydrogenase [Mycobacterium parascrofulaceum ATCC BAA-614]
M. shigaense_orf02203	1553764	1552628	-	378	90	0	0	0	COG0614	NA	P	ABC-type Fe3+-hydroxamate transport system, periplasmic component [Mycobacterium avium subsp. paratuberculosis S397] gi|336459263|gb|EGO38208.1| ABC-type Fe3+-hydroxamate transport system, periplasmic component [Mycobacterium avium subsp. paratubercu ...
M. shigaense_orf02204	1553967	1555691	+	574	176	0	0	0	COG0843	NA	C	cytochrome c oxidase, subunit I [Mycobacterium parascrofulaceum ATCC BAA-614] gi|295894299|gb|EFG74054.1| cytochrome c oxidase, subunit I [Mycobacterium parascrofulaceum ATCC BAA-614]
M. shigaense_orf02207	1555717	1556952	+	411	76	0	0	0	COG3830;COG0560	NA	E,T	phosphoserine phosphatase serB2 [Mycobacterium tuberculosis SUMu002] gi|308377207|ref|ZP_07441494.2| phosphoserine phosphatase serB2 [Mycobacterium tuberculosis SUMu008] gi|308325896|gb|EFP14747.1| phosphoserine phosphatase serB2 [Mycobacterium tuber ...
M. shigaense_orf02208	1557010	1557864	+	284	53	0	0	0	COG1119	NA	P	molybdenum ABC transporter ATPase [Mycobacterium avium 104] gi|118168268|gb|ABK69165.1| ABC-type molybdenum transport system, ATPase component [Mycobacterium avium 104]
M. shigaense_orf02210	1557861	1558688	+	275	65	0	0	0	COG0494	NA	R,L	hypothetical protein MCOL_V222106 [Mycobacterium colombiense CECT 3035] gi|400330136|gb|EJO87635.1| hypothetical protein MCOL_V222106 [Mycobacterium colombiense CECT 3035]
M. shigaense_orf02211	1558685	1559362	+	225	54	0	0	0	COG1024	NA	I	enoyl-CoA hydratase [Mycobacterium sp. MOTT36Y] gi|443306913|ref|ZP_21036700.1| enoyl-CoA hydratase [Mycobacterium sp. H4Y] gi|386790572|gb|AFJ36691.1| enoyl-CoA hydratase [Mycobacterium sp. MOTT36Y] gi|442764281|gb|ELR82279.1| enoyl-CoA hydratase [M ...
M. shigaense_orf02212	1559642	1560244	+	200	81	0	0	0	NA	NA	NA	Conserved protein of unknown function (part2) [Mycobacterium canettii CIPT 140070010] gi|432162721|emb|CCK60104.1| Conserved protein of unknown function (part2) [Mycobacterium canettii CIPT 140070010]
M. shigaense_orf02214	1560697	1560491	-	68	47	1	0	0	NA	NA	NA	NA
M. shigaense_orf02216	1560998	1560705	-	97	57	1	0	0	NA	NA	NA	conserved hypothetical protein [Mycobacterium parascrofulaceum ATCC BAA-614] gi|295894630|gb|EFG74364.1| conserved hypothetical protein [Mycobacterium parascrofulaceum ATCC BAA-614]
M. shigaense_orf02219	1561071	1562033	+	320	79	0	0	0	COG0500	NA	Q,R	methyltransferase, UbiE/COQ5 family protein [Mycobacterium indicus pranii MTCC 9506] gi|405130543|gb|AFS15798.1| Methyltransferase, UbiE/COQ5 family protein [Mycobacterium indicus pranii MTCC 9506]
M. shigaense_orf02220	1562189	1563220	+	343	57	0	0	0	COG0500	NA	Q,R	hypothetical protein MAP3085c [Mycobacterium avium subsp. paratuberculosis K-10] gi|41398003|gb|AAS05633.1| hypothetical protein MAP_3085c [Mycobacterium avium subsp. paratuberculosis K-10]
M. shigaense_orf02221	1563291	1563977	+	228	97	0	0	0	NA	NOG284539;NOG70104	S	hypothetical protein W7S_18665 [Mycobacterium sp. MOTT36Y] gi|443306910|ref|ZP_21036697.1| hypothetical protein W7U_14685 [Mycobacterium sp. H4Y] gi|386790569|gb|AFJ36688.1| hypothetical protein W7S_18665 [Mycobacterium sp. MOTT36Y] gi|442764278|gb|E ...
M. shigaense_orf02222	1565312	1563990	-	440	81	0	0	0	COG1520	NA	S	Pyrrolo-quinoline quinone [Mycobacterium parascrofulaceum ATCC BAA-614] gi|295894308|gb|EFG74063.1| Pyrrolo-quinoline quinone [Mycobacterium parascrofulaceum ATCC BAA-614]
M. shigaense_orf02224	1565427	1566155	+	242	75	0	0	0	COG0110	NA	R	hypothetical protein MAP3082c [Mycobacterium avium subsp. paratuberculosis K-10] gi|41398000|gb|AAS05630.1| hypothetical protein MAP_3082c [Mycobacterium avium subsp. paratuberculosis K-10]
M. shigaense_orf02225	1566224	1566517	+	97	64	1	0	0	NA	NA	NA	hypothetical protein Mvan_2995 [Mycobacterium vanbaalenii PYR-1] gi|119956795|gb|ABM13800.1| hypothetical protein Mvan_2995 [Mycobacterium vanbaalenii PYR-1]
M. shigaense_orf02228	1568588	1568100	-	162	96	0	0	0	COG3476	NA	T	tryptophan-rich sensory protein [Mycobacterium parascrofulaceum ATCC BAA-614] gi|295894312|gb|EFG74067.1| tryptophan-rich sensory protein [Mycobacterium parascrofulaceum ATCC BAA-614]
M. shigaense_orf02229	1568100	1566772	-	442	68	0	0	0	COG0415	NA	L	deoxyribodipyrimidine photo-lyase [Mycobacterium colombiense CECT 3035] gi|400330128|gb|EJO87627.1| deoxyribodipyrimidine photo-lyase [Mycobacterium colombiense CECT 3035]
M. shigaense_orf02231	1570663	1568585	-	692	130	0	0	0	COG2409	NA	R	hypothetical protein MCOL_V222056 [Mycobacterium colombiense CECT 3035] gi|400330126|gb|EJO87625.1| hypothetical protein MCOL_V222056 [Mycobacterium colombiense CECT 3035]
M. shigaense_orf02232	1570760	1571266	+	168	191	0	0	0	COG1846	NOG264589	K	regulatory protein MarR [Mycobacterium rhodesiae JS60] gi|353190294|gb|EHB55804.1| regulatory protein MarR [Mycobacterium rhodesiae JS60]
M. shigaense_orf02233	1571341	1571517	+	58	142	0	0	0	NA	NA	NA	tryptophan-rich sensory protein [Mycobacterium smegmatis JS623] gi|433297995|gb|AGB23815.1| tryptophan-rich sensory protein [Mycobacterium smegmatis JS623]
M. shigaense_orf02234	1571514	1572557	+	347	148	0	0	0	COG1304	NA	C	isopentenyl-diphosphate delta-isomerase [Mycobacterium indicus pranii MTCC 9506] gi|405130533|gb|AFS15788.1| Isopentenyl-diphosphate delta-isomerase [Mycobacterium indicus pranii MTCC 9506]
M. shigaense_orf02236	1572567	1573853	+	428	77	0	0	0	COG1819	NA	C,G	putative glycosyltransferase [Mycobacterium intracellulare ATCC 13950] gi|379748445|ref|YP_005339266.1| putative glycosyltransferase [Mycobacterium intracellulare ATCC 13950] gi|379755730|ref|YP_005344402.1| putative glycosyltransferase [Mycobacteriu ...
M. shigaense_orf02239	1575627	1574611	-	338	146	0	0	0	NA	NOG75018	C	methylesterase [Mycobacterium parascrofulaceum ATCC BAA-614] gi|295894199|gb|EFG73956.1| methylesterase [Mycobacterium parascrofulaceum ATCC BAA-614]
M. shigaense_orf02241	1577147	1575624	-	507	125	0	0	0	COG3349	NA	S	hypothetical protein MAP3075 [Mycobacterium avium subsp. paratuberculosis K-10] gi|41397993|gb|AAS05623.1| hypothetical protein MAP_3075 [Mycobacterium avium subsp. paratuberculosis K-10]
M. shigaense_orf02242	1577869	1577144	-	241	110	0	0	0	COG2226	NOG282618;NOG71304	H,R	UbiE/COQ5 family methyltransferase [Mycobacterium intracellulare ATCC 13950] gi|379755723|ref|YP_005344395.1| UbiE/COQ5 family methyltransferase [Mycobacterium intracellulare MOTT-02] gi|378800802|gb|AFC44938.1| methyltransferase, UbiE/COQ5 family pr ...
M. shigaense_orf02245	1578167	1577856	-	103	116	0	0	0	NA	NOG113385	S	lycopene cyclase [Mycobacterium sp. MOTT36Y] gi|443306891|ref|ZP_21036678.1| lycopene cyclase [Mycobacterium sp. H4Y] gi|386790550|gb|AFJ36669.1| lycopene cyclase [Mycobacterium sp. MOTT36Y] gi|442764259|gb|ELR82257.1| lycopene cyclase [Mycobacterium ...
M. shigaense_orf02246	1578487	1578164	-	107	172	0	0	0	NA	NOG272032;NOG76963	S	lycopene cyclase, CrtYc [Mycobacterium marinum M] gi|1928933|gb|AAB71429.1| unknown [Mycobacterium marinum] gi|183178102|gb|ACC43212.1| lycopene cyclase, CrtYc [Mycobacterium marinum M]
M. shigaense_orf02247	1579434	1578484	-	316	156	0	0	0	COG1562	NA	I	phytoene synthase [Mycobacterium parascrofulaceum ATCC BAA-614] gi|295894204|gb|EFG73961.1| phytoene synthase [Mycobacterium parascrofulaceum ATCC BAA-614]
M. shigaense_orf02248	1580975	1579431	-	514	157	0	0	0	COG1233	NA	Q	phytoene dehydrogenase [Mycobacterium indicus pranii MTCC 9506] gi|405130519|gb|AFS15774.1| Phytoene dehydrogenase [Mycobacterium indicus pranii MTCC 9506]
M. shigaense_orf02249	1582015	1580954	-	353	292	0	0	0	COG0142	NA	H	idsA2_2 [Mycobacterium colombiense CECT 3035] gi|400330112|gb|EJO87611.1| idsA2_2 [Mycobacterium colombiense CECT 3035]
M. shigaense_orf02250	1583761	1582337	-	474	130	0	0	0	COG1090;COG4276	NA	S,R	nucleoside-diphosphate sugar epimerase [Mycobacterium parascrofulaceum ATCC BAA-614] gi|295894212|gb|EFG73969.1| nucleoside-diphosphate sugar epimerase [Mycobacterium parascrofulaceum ATCC BAA-614]
M. shigaense_orf02251	1583760	1583999	+	79	192	1	0	0	NA	NA	NA	dehydrogenase/reductase [Mycobacterium marinum M] gi|183175020|gb|ACC40130.1| dehydrogenase/reductase [Mycobacterium marinum M]
M. shigaense_orf02252	1585265	1584033	-	410	82	0	0	0	COG0438	NA	M	Alpha (1->4) glucosyltransferase [Mycobacterium canettii CIPT 140070017] gi|432167694|emb|CCK65216.1| Alpha (1->4) glucosyltransferase [Mycobacterium canettii CIPT 140070017]
M. shigaense_orf02254	1586824	1585274	-	516	53	0	0	1	COG1543	NA	S	glycosyl hydrolase family protein [Mycobacterium colombiense CECT 3035] gi|400330105|gb|EJO87604.1| glycosyl hydrolase family protein [Mycobacterium colombiense CECT 3035]
M. shigaense_orf02256	1587603	1586851	-	250	65	0	0	1	COG0500	NA	Q,R	conserved hypothetical protein [Mycobacterium parascrofulaceum ATCC BAA-614] gi|295894215|gb|EFG73972.1| conserved hypothetical protein [Mycobacterium parascrofulaceum ATCC BAA-614]
M. shigaense_orf02257	1587911	1588711	+	266	237	0	0	1	COG2086	NA	C	electron transfer flavoprotein subunit beta [Mycobacterium sp. MOTT36Y] gi|386790537|gb|AFJ36656.1| electron transfer flavoprotein beta-subunit [Mycobacterium sp. MOTT36Y]
M. shigaense_orf02259	1588753	1589709	+	318	206	0	0	1	COG2025	NA	C	electron transfer flavoprotein subunit alpha [Mycobacterium colombiense CECT 3035] gi|400330102|gb|EJO87601.1| electron transfer flavoprotein subunit alpha [Mycobacterium colombiense CECT 3035]
M. shigaense_orf02260	1589759	1589887	+	42	83	1	0	0	NA	NA	NA	NA
M. shigaense_orf02261	1590004	1590849	+	281	56	0	0	0	COG3176	NA	R	hypothetical protein MAV_3874 [Mycobacterium avium 104] gi|118167560|gb|ABK68457.1| conserved hypothetical protein [Mycobacterium avium 104]
M. shigaense_orf02262	1590846	1591697	+	283	50	0	0	0	COG0204	NA	I	Conserved protein of unknown function [Mycobacterium canettii CIPT 140070010] gi|432163707|emb|CCK61129.1| Conserved protein of unknown function [Mycobacterium canettii CIPT 140070010]
M. shigaense_orf02264	1591815	1593008	+	397	192	0	0	1	COG1104	NA	E	cysteine desulfurase [Mycobacterium tuberculosis str. Beijing/NITR203] gi|478742980|gb|AGJ69140.1| cysteine desulfurase [Mycobacterium tuberculosis str. Beijing/NITR203]
M. shigaense_orf02265	1593005	1594081	+	358	136	0	0	1	COG0482	NA	J	tRNA-specific 2-thiouridylase MnmA [Mycobacterium sp. H4Y] gi|442764241|gb|ELR82239.1| tRNA-specific 2-thiouridylase MnmA [Mycobacterium sp. H4Y]
M. shigaense_orf02268	1594208	1594492	+	94	117	0	0	0	NA	NA	NA	hypothetical protein Mycsm_00448 [Mycobacterium smegmatis JS623] gi|433295080|gb|AGB20900.1| hypothetical protein Mycsm_00448 [Mycobacterium smegmatis JS623]
M. shigaense_orf02270	1595142	1594498	-	214	84	0	1	0	NA	NOG39588	NA	LpqA family protein [Mycobacterium parascrofulaceum ATCC BAA-614] gi|295894225|gb|EFG73982.1| LpqA family protein [Mycobacterium parascrofulaceum ATCC BAA-614]
M. shigaense_orf02271	1595241	1596254	+	337	63	0	0	0	NA	NOG05970	S	hypothetical protein MMAR_1692 [Mycobacterium marinum M] gi|183175032|gb|ACC40142.1| conserved hypothetical protein [Mycobacterium marinum M]
M. shigaense_orf02274	1596289	1598364	+	691	87	0	0	0	COG0272	NA	L	NAD-dependent DNA ligase LigA [Mycobacterium xenopi RIVM700367] gi|383332772|gb|EID11247.1| NAD-dependent DNA ligase LigA [Mycobacterium xenopi RIVM700367]
M. shigaense_orf02276	1598372	1599484	+	370	73	0	0	0	COG0626	NA	E	cystathionine gamma-lyase [Mycobacterium sp. H4Y] gi|442764235|gb|ELR82233.1| cystathionine gamma-lyase [Mycobacterium sp. H4Y]
M. shigaense_orf02279	1599509	1600114	+	201	132	0	0	0	COG1309	NOG231263	K,S	hypothetical protein MAP3052c [Mycobacterium avium subsp. paratuberculosis K-10] gi|254776287|ref|ZP_05217803.1| hypothetical protein MaviaA2_16677 [Mycobacterium avium subsp. avium ATCC 25291] gi|417749320|ref|ZP_12397722.1| transcriptional regulato ...
M. shigaense_orf02280	1600902	1601591	+	229	35	0	0	0	NA	NOG46679;NOG42964	S	hypothetical protein MAV_4376 [Mycobacterium avium 104] gi|118165735|gb|ABK66632.1| conserved hypothetical protein [Mycobacterium avium 104]
M. shigaense_orf02281	1601887	1602291	+	134	44	0	0	0	NA	NA	NA	hypothetical protein MintA_10976 [Mycobacterium intracellulare ATCC 13950] gi|379748410|ref|YP_005339231.1| hypothetical protein OCU_36910 [Mycobacterium intracellulare ATCC 13950] gi|379755695|ref|YP_005344367.1| hypothetical protein OCO_36830 [Myco ...
M. shigaense_orf02283	1602299	1605205	+	968	56	0	0	0	COG2409	NA	R	putative transmembrane transport protein [Mycobacterium colombiense CECT 3035] gi|400330089|gb|EJO87588.1| putative transmembrane transport protein [Mycobacterium colombiense CECT 3035]
M. shigaense_orf02285	1605858	1605202	-	218	129	0	0	1	NA	NOG06574	NA	ACT domain-containing protein [Mycobacterium colombiense CECT 3035] gi|400330088|gb|EJO87587.1| ACT domain-containing protein [Mycobacterium colombiense CECT 3035]
M. shigaense_orf02286	1605932	1606240	+	102	150	0	0	1	COG0721	NA	J	Putative glutamyl-tRNA(Gln) amidotransferase (subunit C) GatC (Glu-ADT subunit C) [Mycobacterium canettii CIPT 140070008] gi|432159751|emb|CCK57062.1| Putative glutamyl-tRNA(Gln) amidotransferase (subunit C) GatC (Glu-ADT subunit C) [Mycobacterium ca ...
M. shigaense_orf02287	1606237	1607721	+	494	51	0	0	1	COG0154	NA	J	Putative glutamyl-tRNA(Gln) amidotransferase (subunit A) GatA (Glu-ADT subunit A) [Mycobacterium canettii CIPT 140070010] gi|432163697|emb|CCK61119.1| Putative glutamyl-tRNA(Gln) amidotransferase (subunit A) GatA (Glu-ADT subunit A) [Mycobacterium ca ...
M. shigaense_orf02288	1607841	1608122	+	93	129	0	0	0	NA	NA	NA	hypothetical protein [Mycobacterium rhodesiae NBB3] gi|359820773|gb|AEV73586.1| hypothetical protein MycrhN_3046 [Mycobacterium rhodesiae NBB3]
M. shigaense_orf02290	1608554	1608285	-	89	98	1	0	0	NA	NA	NA	hypothetical protein MyctuDRAFT_3123 [Mycobacterium tusciae JS617] gi|373550687|gb|EHP77323.1| hypothetical protein MyctuDRAFT_3123 [Mycobacterium tusciae JS617]
M. shigaense_orf02291	1608791	1609822	+	343	117	0	0	0	COG0205	NA	G	6-phosphofructokinase [Mycobacterium avium subsp. paratuberculosis K-10] gi|118467293|ref|YP_883021.1| 6-phosphofructokinase [Mycobacterium avium 104] gi|254776279|ref|ZP_05217795.1| 6-phosphofructokinase [Mycobacterium avium subsp. avium ATCC 25291] ...
M. shigaense_orf02293	1610378	1611892	+	504	206	0	0	1	COG0064	NA	J	glutamyl-tRNA(Gln) amidotransferase subunit B [Mycobacterium parascrofulaceum ATCC BAA-614] gi|295894237|gb|EFG73994.1| glutamyl-tRNA(Gln) amidotransferase subunit B [Mycobacterium parascrofulaceum ATCC BAA-614]
M. shigaense_orf02295	1613060	1611939	-	373	143	0	0	1	COG2133	NA	G	LppZ family protein [Mycobacterium parascrofulaceum ATCC BAA-614] gi|295894238|gb|EFG73995.1| LppZ family protein [Mycobacterium parascrofulaceum ATCC BAA-614]
M. shigaense_orf02296	1613375	1614133	+	252	277	0	0	0	COG2259	NA	S	DoxX family protein [Mycobacterium parascrofulaceum ATCC BAA-614] gi|295894239|gb|EFG73996.1| DoxX family protein [Mycobacterium parascrofulaceum ATCC BAA-614]
M. shigaense_orf02297	1614497	1614138	-	119	144	0	0	0	NA	NOG17687	NA	low molecular weight protein antigen 6 cfp6 [Mycobacterium intracellulare ATCC 13950] gi|379748395|ref|YP_005339216.1| low molecular weight protein antigen 6 cfp6 [Mycobacterium intracellulare ATCC 13950] gi|379755684|ref|YP_005344356.1| low molecula ...
M. shigaense_orf02299	1614933	1614799	-	44	162	1	0	0	NA	NA	NA	NA
M. shigaense_orf02301	1614952	1616679	+	575	141	0	0	1	COG0028	NA	H,E	acetolactate synthase 1 catalytic subunit [Mycobacterium colombiense CECT 3035] gi|400330079|gb|EJO87578.1| acetolactate synthase 1 catalytic subunit [Mycobacterium colombiense CECT 3035]
M. shigaense_orf02304	1616732	1617244	+	170	120	0	0	1	COG0440	NA	E	acetolactate synthase 3 regulatory subunit [Mycobacterium avium subsp. paratuberculosis K-10] gi|118465974|ref|YP_883015.1| acetolactate synthase 3 regulatory subunit [Mycobacterium avium 104] gi|254776272|ref|ZP_05217788.1| acetolactate synthase 3 r ...
M. shigaense_orf02305	1617273	1618286	+	337	219	0	0	1	COG0059	NA	H,E	ketol-acid reductoisomerase [Mycobacterium sp. MOTT36Y] gi|443306848|ref|ZP_21036635.1| ketol-acid reductoisomerase [Mycobacterium sp. H4Y] gi|386790507|gb|AFJ36626.1| ketol-acid reductoisomerase [Mycobacterium sp. MOTT36Y] gi|442764216|gb|ELR82214.1 ...
M. shigaense_orf02307	1618965	1618366	-	199	86	0	0	0	COG0655	NA	R	NAD(P)H:quinone oxidoreductase, type IV [Mycobacterium sp. MOTT36Y] gi|443306847|ref|ZP_21036634.1| NAD(P)H:quinone oxidoreductase, type IV [Mycobacterium sp. H4Y] gi|386790506|gb|AFJ36625.1| NAD(P)H:quinone oxidoreductase, type IV [Mycobacterium sp. ...
M. shigaense_orf02309	1620416	1618962	-	484	53	0	0	0	COG1233	NA	Q	hypothetical protein MAP3034 [Mycobacterium avium subsp. paratuberculosis K-10] gi|417749340|ref|ZP_12397741.1| phytoene dehydrogenase-like oxidoreductase [Mycobacterium avium subsp. paratuberculosis S397] gi|440778495|ref|ZP_20957253.1| hypothetical ...
M. shigaense_orf02311	1620461	1622032	+	523	141	0	0	1	COG0111	NA	H,E	D-3-phosphoglycerate dehydrogenase [Mycobacterium colombiense CECT 3035] gi|400330074|gb|EJO87573.1| D-3-phosphoglycerate dehydrogenase [Mycobacterium colombiense CECT 3035]
M. shigaense_orf02313	1622061	1623071	+	336	144	0	0	1	COG0473	NA	C,E	3-isopropylmalate dehydrogenase [Mycobacterium avium subsp. paratuberculosis K-10] gi|417749342|ref|ZP_12397743.1| isocitrate/isopropylmalate dehydrogenase [Mycobacterium avium subsp. paratuberculosis S397] gi|81571105|sp|Q73VI1.1|LEU3_MYCPA RecName: ...
M. shigaense_orf02315	1623287	1623955	+	222	64	1	0	0	NA	NA	NA	NA
M. shigaense_orf02317	1624091	1624342	+	83	55	1	0	0	NA	NA	NA	NA
M. shigaense_orf02319	1624389	1625189	+	266	74	0	0	1	COG0179	NA	Q	2-hydroxyhepta-2,4-diene-1,7-dioate isomerase [Mycobacterium marinum M] gi|183175057|gb|ACC40167.1| 2-hydroxyhepta-2,4-diene-1,7-dioate isomerase [Mycobacterium marinum M]
M. shigaense_orf02320	1625264	1626664	+	466	67	0	0	1	COG0008	NA	J	glutamyl-tRNA synthetase [Mycobacterium intracellulare ATCC 13950] gi|379748384|ref|YP_005339205.1| glutamyl-tRNA synthetase [Mycobacterium intracellulare ATCC 13950] gi|379755673|ref|YP_005344345.1| glutamyl-tRNA synthetase [Mycobacterium intracellu ...
M. shigaense_orf02322	1627604	1627014	-	196	102	0	0	0	NA	NOG46670	R	pyridoxamine 5'-phosphate oxidase family protein [Mycobacterium parascrofulaceum ATCC BAA-614] gi|295894250|gb|EFG74007.1| pyridoxamine 5'-phosphate oxidase family protein [Mycobacterium parascrofulaceum ATCC BAA-614]
M. shigaense_orf02323	1628421	1627720	-	233	167	0	0	0	COG1414	NA	K	hypothetical protein MAP3027 [Mycobacterium avium subsp. paratuberculosis K-10] gi|254776262|ref|ZP_05217778.1| hypothetical protein MaviaA2_16548 [Mycobacterium avium subsp. avium ATCC 25291] gi|417749347|ref|ZP_12397748.1| transcriptional regulator ...
M. shigaense_orf02325	1628507	1629922	+	471	241	0	0	1	COG0065	NA	E	isopropylmalate isomerase large subunit [Mycobacterium avium subsp. paratuberculosis K-10] gi|417749348|ref|ZP_12397749.1| 3-isopropylmalate dehydratase, large subunit [Mycobacterium avium subsp. paratuberculosis S397] gi|440778487|ref|ZP_20957245.1| ...
M. shigaense_orf02326	1629943	1630539	+	198	191	0	0	1	COG0066	NA	E	isopropylmalate isomerase small subunit [Mycobacterium intracellulare ATCC 13950] gi|379763213|ref|YP_005349610.1| isopropylmalate isomerase small subunit [Mycobacterium intracellulare MOTT-64] gi|406031921|ref|YP_006730813.1| 3-isopropylmalate dehyd ...
M. shigaense_orf02327	1630753	1631400	+	215	790	0	0	0	COG0776	NA	L	nucleoid DNA-binding protein [Mycobacterium xenopi RIVM700367] gi|383332726|gb|EID11201.1| nucleoid DNA-binding protein [Mycobacterium xenopi RIVM700367]
M. shigaense_orf02328	1632384	1631467	-	305	83	0	0	0	COG0494;COG0406	NA	R,L,G	MutT1 [Mycobacterium colombiense CECT 3035] gi|400330064|gb|EJO87563.1| MutT1 [Mycobacterium colombiense CECT 3035]
M. shigaense_orf02330	1634680	1632458	-	740	92	0	0	1	COG0855	NA	P	polyphosphate kinase [Mycobacterium parascrofulaceum ATCC BAA-614] gi|295894256|gb|EFG74013.1| polyphosphate kinase [Mycobacterium parascrofulaceum ATCC BAA-614]
M. shigaense_orf02331	1635417	1634755	-	220	48	0	0	0	COG1920	NA	S	hypothetical protein MCOL_V221736 [Mycobacterium colombiense CECT 3035] gi|400330062|gb|EJO87561.1| hypothetical protein MCOL_V221736 [Mycobacterium colombiense CECT 3035]
M. shigaense_orf02332	1635495	1636526	+	343	58	0	0	1	COG0240	NA	C	NAD(P)H-dependent glycerol-3-phosphate dehydrogenase [Mycobacterium sp. H4Y] gi|442764199|gb|ELR82197.1| NAD(P)H-dependent glycerol-3-phosphate dehydrogenase [Mycobacterium sp. H4Y]
M. shigaense_orf02333	1636547	1637668	+	373	128	0	0	1	COG1181	NA	M	D-alanyl-alanine synthetase A [Mycobacterium sp. MOTT36Y] gi|386790489|gb|AFJ36608.1| D-alanyl-alanine synthetase A [Mycobacterium sp. MOTT36Y]
M. shigaense_orf02334	1638260	1637685	-	191	95	0	0	0	NA	NOG08661;NOG245334	S	hypothetical protein MAV_3831 [Mycobacterium avium 104] gi|118165169|gb|ABK66066.1| conserved hypothetical protein [Mycobacterium avium 104]
M. shigaense_orf02335	1638345	1639322	+	325	123	0	0	0	COG0611	NA	H	Putative thiamine-monophosphate kinase ThiL (thiamine-phosphate kinase) [Mycobacterium canettii CIPT 140070017] gi|432167635|emb|CCK65155.1| Putative thiamine-monophosphate kinase ThiL (thiamine-phosphate kinase) [Mycobacterium canettii CIPT 14007001 ...
M. shigaense_orf02336	1639342	1640025	+	227	318	0	0	1	COG0692	NA	L	uracil-DNA glycosylase [Mycobacterium intracellulare ATCC 13950] gi|379763203|ref|YP_005349600.1| uracil-DNA glycosylase [Mycobacterium intracellulare MOTT-64] gi|406031911|ref|YP_006730803.1| uracil-DNA glycosylase [Mycobacterium indicus pranii MTCC ...
M. shigaense_orf02337	1640202	1640059	-	47	1337	0	0	0	COG0227	NA	J	50S ribosomal protein L28 [Mycobacterium colombiense CECT 3035] gi|400330049|gb|EJO87548.1| 50S ribosomal protein L28 [Mycobacterium colombiense CECT 3035]
M. shigaense_orf02340	1640462	1642138	+	558	196	0	0	0	COG1461	NA	R	hypothetical protein MCOL_V221661 [Mycobacterium colombiense CECT 3035] gi|400330047|gb|EJO87546.1| hypothetical protein MCOL_V221661 [Mycobacterium colombiense CECT 3035]
M. shigaense_orf02343	1642144	1644360	+	738	87	0	0	0	COG1200	NA	K,L	ATP-dependent DNA helicase RecG [Mycobacterium marinum M] gi|183175081|gb|ACC40191.1| ATP-dependent DNA helicase RecG [Mycobacterium marinum M]
M. shigaense_orf02345	1644357	1645067	+	236	69	0	0	0	NA	NOG06575	S	Conserved protein of unknown function possibly membrane or secreted [Mycobacterium canettii CIPT 140070010] gi|432163657|emb|CCK61079.1| Conserved protein of unknown function possibly membrane or secreted [Mycobacterium canettii CIPT 140070010]
M. shigaense_orf02347	1645416	1645258	-	52	203	1	0	0	NA	NA	NA	NA
M. shigaense_orf02349	1645773	1645994	+	73	161	1	0	0	NA	NA	NA	NA
M. shigaense_orf02350	1645999	1647252	+	417	127	0	0	0	COG5651	NA	N	Conserved protein of unknown function, PPE family protein [Mycobacterium canettii CIPT 140070010] gi|432162501|emb|CCK59877.1| Conserved protein of unknown function, PPE family protein [Mycobacterium canettii CIPT 140070010]
M. shigaense_orf02351	1647361	1648650	+	429	93	0	0	0	COG5651	NA	N	Conserved protein of unknown function, PPE family protein PPE33 [Mycobacterium canettii CIPT 140070008] gi|432158490|emb|CCK55784.1| Conserved protein of unknown function, PPE family protein PPE33 [Mycobacterium canettii CIPT 140070008]
M. shigaense_orf02352	1648815	1648970	+	51	72	0	0	0	NA	NA	NA	hypothetical protein MAV_2904 [Mycobacterium avium 104] gi|118166795|gb|ABK67692.1| conserved hypothetical protein [Mycobacterium avium 104]
M. shigaense_orf02353	1648784	1648665	-	39	76	1	0	0	NA	NA	NA	NA
M. shigaense_orf02354	1649175	1650884	+	569	53	0	0	0	COG1574	NA	R	Amidohydrolase 3 [Mycobacterium rhodesiae JS60] gi|353188157|gb|EHB53678.1| Amidohydrolase 3 [Mycobacterium rhodesiae JS60]
M. shigaense_orf02356	1650897	1652552	+	551	57	1	0	0	NA	NA	NA	hypothetical protein IMCC3088_852 [gamma proteobacterium IMCC3088] gi|328922917|gb|EGG30246.1| hypothetical protein IMCC3088_852 [gamma proteobacterium IMCC3088]
M. shigaense_orf02358	1652994	1653725	+	243	149	1	0	0	NA	NA	NA	Protein of unknown function (DUF2910) [Mycobacterium chubuense NBB4] gi|390614089|gb|AFM15239.1| Protein of unknown function (DUF2910) [Mycobacterium chubuense NBB4]
M. shigaense_orf02359	1654614	1653769	-	281	256	0	0	0	COG0656	NA	R	aldo/keto reductase, diketogulonate reductase [Mycobacterium avium subsp. paratuberculosis S397] gi|254803984|sp|A0QJ99.2|Y3816_MYCA1 RecName: Full=Uncharacterized oxidoreductase MAV_3816 gi|336459137|gb|EGO38085.1| aldo/keto reductase, diketogulonat ...
M. shigaense_orf02362	1655249	1654620	-	209	201	0	0	0	NA	NA	NA	2,5-didehydrogluconate reductase [Mycobacterium phlei RIVM601174] gi|383334053|gb|EID12496.1| 2,5-didehydrogluconate reductase [Mycobacterium phlei RIVM601174]
M. shigaense_orf02363	1655299	1656369	+	356	115	0	0	0	COG0657	NA	I	lipase 2 [Mycobacterium indicus pranii MTCC 9506] gi|405130444|gb|AFS15699.1| Lipase 2 [Mycobacterium indicus pranii MTCC 9506]
M. shigaense_orf02364	1656404	1657171	+	255	310	0	0	0	COG1651	NA	O	hypothetical protein MAP3005c [Mycobacterium avium subsp. paratuberculosis K-10] gi|118465290|ref|YP_882984.1| hypothetical protein MAV_3813 [Mycobacterium avium 104] gi|254776237|ref|ZP_05217753.1| hypothetical protein MaviaA2_16413 [Mycobacterium a ...
M. shigaense_orf02365	1657168	1657764	+	198	158	0	0	1	COG4243	NA	S	integral membrane protein [Mycobacterium parascrofulaceum ATCC BAA-614] gi|295894191|gb|EFG73949.1| integral membrane protein [Mycobacterium parascrofulaceum ATCC BAA-614]
M. shigaense_orf02367	1657775	1661170	+	1131	96	0	0	0	COG1038	NA	C	pyruvate carboxylase [Mycobacterium marinum M] gi|183175088|gb|ACC40198.1| pyruvate carboxylase Pca [Mycobacterium marinum M]
[truncated: 3,456 more rows]
