# Supplementary material
Source: publisher figshare collection journal article supplement (https://tandf.figshare.com/articles/dataset/_/7936865)
Supplement: Supplementary file 1 [file 1 › temi_a_12040023_sm0012.xlsx]

## Sheet: Sheet1
Supplementary Table S5. Informations of M. shigaense rRNAs and tRNAs
Id	Start	End	Strand	Type
tRNA_1	10842	10915	+	Ile_GAT
tRNA_2	11052	11127	+	Ala_TGC
tRNA_3	27857	27942	+	Leu_CAG
tRNA_4	149200	149295	+	SeC_TCA
tRNA_5	818125	818210	+	Tyr_GTA
tRNA_6	848079	848151	+	Thr_GGT
tRNA_7	848186	848262	+	Met_CAT
tRNA_8	850101	850173	+	Trp_CCA
tRNA_9	1340301	1340377	+	Met_CAT
tRNA_10	1478597	1478669	+	Ala_GGC
tRNA_11	1626779	1626853	+	Gln_CTG
tRNA_12	1626935	1627010	+	Glu_CTC
tRNA_13	1961054	1961128	+	Val_CAC
tRNA_14	2536414	2536490	+	Pro_GGG
tRNA_15	3164755	3164840	+	Leu_GAG
tRNA_16	3438705	3438775	+	Cys_GCA
tRNA_17	3658171	3658241	+	Gly_TCC
tRNA_18	3689424	3689500	+	Arg_TCT
tRNA_19	3733025	3733100	+	His_GTG
tRNA_20	3735465	3735540	+	Lys_CTT
tRNA_21	3913929	3914004	+	Arg_CCG
tRNA_22	4249756	4249827	+	Gln_TTG
tRNA_23	4388462	4388534	+	Arg_CCT
tRNA_24	4595443	4595518	+	Lys_TTT
tRNA_25	4678966	4679037	+	Thr_TGT
tRNA_26	4902348	4902424	+	Pro_CGG
tRNA_27	4960989	4961074	+	Ser_GGA
tRNA_28	5045785	5045696	-	Ser_TGA
tRNA_29	5039643	5039555	-	Ser_GCT
tRNA_30	5039518	5039446	-	Arg_ACG
tRNA_31	5012097	5012008	-	Ser_CGA
tRNA_32	4859291	4859216	-	Thr_CGT
tRNA_33	4595332	4595260	-	Glu_TTC
tRNA_34	4595222	4595146	-	Asp_GTC
tRNA_35	4595119	4595043	-	Phe_GAA
tRNA_36	4314452	4314380	-	Ala_CGC
tRNA_37	4222021	4221945	-	Leu_TAA
tRNA_38	3849509	3849427	-	Leu_TAG
tRNA_39	3658014	3657938	-	Pro_TGG
tRNA_40	3512551	3512476	-	Asn_GTT
tRNA_41	3456813	3456740	-	Met_CAT
tRNA_42	3322395	3322321	-	Val_TAC
tRNA_43	2408869	2408793	-	Leu_CAA
tRNA_44	1960874	1960799	-	Gly_GCC
tRNA_45	1960773	1960700	-	Cys_GCA
tRNA_46	1960686	1960612	-	Val_GAC
tRNA_47	548054	547981	-	Gly_CCC
rRNA_1	3884801	3884912	+	5s_rRNA
rRNA_2	3885015	3888099	+	23s_rRNA
rRNA_3	3888379	3889885	+	16s_rRNA
