# Supplementary material
Source: publisher figshare collection journal article supplement (https://tandf.figshare.com/articles/dataset/_/7936865)
Supplement: Supplementary file 1 [file 1 › temi_a_12040023_sm0013.xlsx]

## Sheet: Sheet1
Supplementary Table S6. Summary of 13 Mycobacterium genomes
	M. shigaense	M. tuberculosis	M. leprae	M. marinum	M. ulcerans	M. avium	M. abscessus	M. smegmatis	M. KMS	M. gilvum	M. vanbaalenii	M. simiae	M. triplex
Size(Mb)	5.21	4.41	3.27	6.64	5.63	4.83	5.07	6.99	5.74	5.55	6.49	5.94	6.38
GC%	67.2	65.6	57.8	65.7	65.5	69.3	64.1	67.4	68.4	67.9	67.8	66.3	66.6
gene	5098	4008	2770	5503	4981	4457	4970	6938	5484	5241	6103	5531	5952
Gene/Genome	91.2	91.4	76.7	90.3	72.4	91.5	93.1	91.2	92.4	94.7	91.5	82.1	91.9
rRNA	3	3	3	3	3	3	3	6	6	6	6	3	3
tRNA	47	45	45	46	45	46	47	47	48	47	49	47	49
Pseudogenes	48	30	1115	54	771	118	NA	167	33	109	82	152	131
