# Supplementary material
Source: publisher figshare collection journal article supplement (https://tandf.figshare.com/articles/dataset/_/7936865)
Supplement: Supplementary file 1 [file 1 › temi_a_12040023_sm0014.xlsx]

## Sheet: Sheet1
Supplementary Table S7. Additional genome elements of M. shigaense
Id	Start	End	Type
IslandViewer1	70523	77440	genomic island
IslandViewer2	82749	88819	genomic island
IslandViewer3	283260	303581	genomic island
IslandViewer4	880190	886581	genomic island
IslandViewer5	912590	942907	genomic island
IslandViewer6	1447359	1452982	genomic island
IslandViewer7	1757399	1767159	genomic island
IslandViewer8	1957328	1967565	genomic island
IslandViewer9	2114298	2118410	genomic island
IslandViewer10	2261854	2276205	genomic island
IslandViewer11	2898779	2909982	genomic island
IslandViewer12	2920100	2935682	genomic island
IslandViewer13	2948608	2953361	genomic island
IslandViewer14	2960981	2967754	genomic island
IslandViewer15	3032605	3041250	genomic island
IslandViewer16	3096556	3105893	genomic island
IslandViewer17	3164988	3171799	genomic island
IslandViewer18	3295248	3299764	genomic island
IslandViewer19	3313702	3321356	genomic island
IslandViewer20	3690833	3697762	genomic island
IslandViewer21	3981912	3986748	genomic island
IslandViewer22	4389242	4394728	genomic island
IslandViewer23	4449706	4456904	genomic island
IslandViewer24	4679014	4686629	genomic island
IslandViewer25	4963013	4967590	genomic island
ISFinder1	86319	86897	insertion sequences
ISFinder2	86984	87274	insertion sequences
ISFinder3	88105	88281	insertion sequences
ISFinder4	103637	104713	insertion sequences
ISFinder5	267405	268481	insertion sequences
ISFinder6	775745	774669	insertion sequences
ISFinder7	822114	821164	insertion sequences
ISFinder8	940287	939700	insertion sequences
ISFinder9	940823	940656	insertion sequences
ISFinder10	940892	940785	insertion sequences
ISFinder11	1328184	1329134	insertion sequences
ISFinder12	1548955	1550031	insertion sequences
ISFinder13	1769248	1770144	insertion sequences
ISFinder14	1837817	1838665	insertion sequences
ISFinder15	1846052	1847128	insertion sequences
ISFinder16	1863651	1864751	insertion sequences
ISFinder17	2523617	2524558	insertion sequences
ISFinder18	2909640	2909353	insertion sequences
ISFinder19	2971692	2972000	insertion sequences
ISFinder20	2971997	2972857	insertion sequences
ISFinder21	3032208	3031348	insertion sequences
ISFinder22	3032513	3032205	insertion sequences
ISFinder23	3321048	3321356	insertion sequences
ISFinder24	3321353	3322213	insertion sequences
ISFinder25	3441037	3439961	insertion sequences
ISFinder26	3587070	3585994	insertion sequences
ISFinder27	3689626	3690000	insertion sequences
ISFinder28	3690025	3690666	insertion sequences
ISFinder29	3701882	3702958	insertion sequences
ISFinder30	3914412	3915341	insertion sequences
ISFinder31	4164681	4165757	insertion sequences
ISFinder32	4313486	4314388	insertion sequences
ISFinder33	4679760	4680068	insertion sequences
ISFinder34	4680065	4680925	insertion sequences
ISFinder35	4682540	4682827	insertion sequences
ISFinder36	4682860	4683051	insertion sequences
ISFinder37	4683083	4683679	insertion sequences
ISFinder38	4707772	4706762	insertion sequences
ISFinder39	4956376	4957326	insertion sequences
CRISPRFinder1	363129	363205	Clustered Regularly Interspaced Short Palindromic Repeats
CRISPRFinder2	563509	563583	Clustered Regularly Interspaced Short Palindromic Repeats
CRISPRFinder3	842349	842424	Clustered Regularly Interspaced Short Palindromic Repeats
CRISPRFinder4	1939260	1939346	Clustered Regularly Interspaced Short Palindromic Repeats
Phast1	548204	548851	prophage sequences
Phast2	548893	549465	prophage sequences
Phast3	549583	551454	prophage sequences
Phast4	551655	553067	prophage sequences
Phast5	553165	554490	prophage sequences
Phast6	554516	555271	prophage sequences
Phast7	555325	555687	prophage sequences
Phast8	555705	556571	prophage sequences
Phast9	1054263	1055147	prophage sequences
Phast10	1055311	1056759	prophage sequences
Phast11	1056962	1057582	prophage sequences
Phast12	1057579	1058049	prophage sequences
Phast13	1058046	1059086	prophage sequences
Phast14	1059327	1059629	prophage sequences
Phast15	1059714	1061336	prophage sequences
Phast16	1527324	1528805	prophage sequences
Phast17	1528924	1529574	prophage sequences
Phast18	1529616	1530521	prophage sequences
Phast19	1530483	1531517	prophage sequences
Phast20	1531514	1532134	prophage sequences
Phast21	1532217	1532774	prophage sequences
Phast22	1533279	1533518	prophage sequences
Phast23	1533547	1533996	prophage sequences
Phast24	1533963	1536131	prophage sequences
Phast25	2705921	2707105	prophage sequences
Phast26	2707102	2708934	prophage sequences
Phast27	2709615	2710832	prophage sequences
Phast28	2710853	2712064	prophage sequences
Phast29	2712082	2712417	prophage sequences
Phast30	2713069	2713254	prophage sequences
Phast31	2713542	2714795	prophage sequences
Phast32	2714872	2716272	prophage sequences
Phast33	2716314	2716637	prophage sequences
Phast34	2716710	2717072	prophage sequences
Phast35	2717191	2717901	prophage sequences
Phast36	2717911	2718243	prophage sequences
Phast37	2718245	2718361	prophage sequences
Phast38	2718465	2719397	prophage sequences
Phast39	2719502	2720188	prophage sequences
Phast40	4015801	4016973	prophage sequences
Phast41	4017019	4017192	prophage sequences
Phast42	4017238	4018407	prophage sequences
Phast43	4018498	4018902	prophage sequences
Phast44	4018903	4020429	prophage sequences
Phast45	4020503	4020886	prophage sequences
Phast46	4020991	4021752	prophage sequences
Phast47	4021937	4022623	prophage sequences
Phast48	4022733	4023371	prophage sequences
Phast49	4023361	4024290	prophage sequences
Phast50	4220128	4221363	prophage sequences
Phast51	4221526	4221861	prophage sequences
Phast52	4221945	4222021	prophage sequences
Phast53	4222383	4223234	prophage sequences
Phast54	4223302	4224444	prophage sequences
Phast55	4224586	4224882	prophage sequences
Phast56	4224933	4225217	prophage sequences
Phast57	4225284	4226633	prophage sequences
Phast58	4226612	4226962	prophage sequences
Phast59	4227338	4228099	prophage sequences
Phast60	4662835	4662851	prophage sequences
Phast61	4671816	4672943	prophage sequences
Phast62	4673004	4675013	prophage sequences
Phast63	4675033	4675449	prophage sequences
Phast64	4675481	4675885	prophage sequences
Phast65	4675882	4677276	prophage sequences
Phast66	4677344	4678063	prophage sequences
Phast67	4678215	4678937	prophage sequences
Phast68	4678966	4679037	prophage sequences
Phast69	4679014	4679466	prophage sequences
Phast70	4679760	4680068	prophage sequences
Phast71	4680065	4680925	prophage sequences
Phast72	4681125	4682222	prophage sequences
Phast73	4682540	4682827	prophage sequences
Phast74	4683083	4683679	prophage sequences
Phast75	4693595	4693611	prophage sequences
Phast76	4833004	4834665	prophage sequences
Phast77	4834753	4835229	prophage sequences
Phast78	4835229	4835744	prophage sequences
Phast79	4835744	4836142	prophage sequences
Phast80	4836135	4836962	prophage sequences
Phast81	4836974	4837582	prophage sequences
Phast82	4837598	4839979	prophage sequences
Phast83	4840141	4840509	prophage sequences
Phast84	4840722	4841636	prophage sequences
Phast85	4841633	4842808	prophage sequences
Phast86	4842808	4843818	prophage sequences
Phast87	4852160	4853236	prophage sequences
Phast88	4853363	4854661	prophage sequences
Phast89	4854675	4855376	prophage sequences
Phast90	4855373	4855708	prophage sequences
Phast91	4855711	4856655	prophage sequences
Phast92	4856687	4858429	prophage sequences
Phast93	4858426	4859214	prophage sequences
Phast94	4859216	4859291	prophage sequences
Phast95	4859347	4860525	prophage sequences
Phast96	5176844	5178211	prophage sequences
Phast97	5178353	5180203	prophage sequences
Phast98	5180200	5181738	prophage sequences
Phast99	5181735	5182733	prophage sequences
Phast100	5182738	5183406	prophage sequences
Phast101	5183403	5184884	prophage sequences
Phast102	5184884	5185789	prophage sequences
Phast103	5189795	5190529	prophage sequences
Phast104	5190559	5192943	prophage sequences
Phast105	5192940	5196563	prophage sequences
Phast106	5196626	5197207	prophage sequences
Phast107	5197264	5197998	prophage sequences
Phast108	5198101	5199114	prophage sequences
Phast109	5199195	5199464	prophage sequences
Phast110	5199656	5200816	prophage sequences
Phast111	5200813	5201562	prophage sequences
Phast112	5201846	5202826	prophage sequences
Phast113	5202850	5203788	prophage sequences
Pseudo1	638974	640293	Pseudogenes
Pseudo2	661308	662447	Pseudogenes
Pseudo3	811670	812695	Pseudogenes
Pseudo4	1242449	1243933	Pseudogenes
Pseudo5	1517370	1519547	Pseudogenes
Pseudo6	1730762	1731100	Pseudogenes
Pseudo7	1877902	1878729	Pseudogenes
Pseudo8	2355028	2357193	Pseudogenes
Pseudo9	3340058	3341005	Pseudogenes
Pseudo10	3580594	3582669	Pseudogenes
Pseudo11	3860441	3863080	Pseudogenes
Pseudo12	4248994	4249608	Pseudogenes
Pseudo13	4470360	4471538	Pseudogenes
Pseudo14	5028921	5030372	Pseudogenes
Pseudo15	176529	176882	Pseudogenes
Pseudo16	424707	426209	Pseudogenes
Pseudo17	454677	454850	Pseudogenes
Pseudo18	527779	528165	Pseudogenes
Pseudo19	722190	722348	Pseudogenes
Pseudo20	1245203	1245376	Pseudogenes
Pseudo21	1308239	1308412	Pseudogenes
Pseudo22	1819575	1820156	Pseudogenes
Pseudo23	2614546	2615454	Pseudogenes
Pseudo24	2701039	2701323	Pseudogenes
Pseudo25	3199596	3199742	Pseudogenes
Pseudo26	3277128	3277307	Pseudogenes
Pseudo27	3438788	3439933	Pseudogenes
Pseudo28	3499938	3500786	Pseudogenes
Pseudo29	3721506	3721979	Pseudogenes
Pseudo30	3783076	3784575	Pseudogenes
Pseudo31	4105629	4105775	Pseudogenes
Pseudo32	4131947	4132486	Pseudogenes
Pseudo33	4209471	4209899	Pseudogenes
Pseudo34	4325711	4325884	Pseudogenes
Pseudo35	4894309	4894470	Pseudogenes
Pseudo36	32479	33311	Pseudogenes
Pseudo37	1143155	1144352	Pseudogenes
Pseudo38	1171412	1172036	Pseudogenes
Pseudo39	1181252	1181946	Pseudogenes
Pseudo40	3225096	3225998	Pseudogenes
Pseudo41	3275637	3275975	Pseudogenes
Pseudo42	3907122	3907380	Pseudogenes
Pseudo43	4809940	4810515	Pseudogenes
