# Supplementary material
Source: publisher figshare collection journal article supplement (https://tandf.figshare.com/articles/dataset/_/7936865)
Supplement: Supplementary file 1 [file 1 › temi_a_12040023_sm0015.xlsx]

## Sheet: Sheet1
Supplementary Table S8. 682 single- copy orthologue genes of the 13 mycobacterium
M.abscessus	M.avium	M.gilvum	M.KMS	M.leprae	M.marinum	M.shigaense	M.simiae	M.smegmatis	M.triplex	M.tuberculosis	M.ulcerans	M.vanbaalenii
CAM60104.1	AAS02318.1	ADT96741.1	ABL89228.1	CAC29509.1	ACC38472.1	SCY_orf00001_1	AMP26146.1	ABK76223.1	CDO86065.1	CCP42723.1	ABL02781.1	ABM10852.1
CAM60105.1	AAS02319.1	ADT96742.1	ABL89229.1	CAC29510.1	ACC38473.1	SCY_orf00002_1	AMP23705.1	ABK70300.1	CDO86066.1	CCP42724.1	ABL02782.1	ABM10853.1
CAM60107.1	AAS02320.1	ADT96744.1	ABL89231.1	CAC29511.1	ACC38474.1	SCY_orf00003_1	AMP23706.1	ABK70100.1	CDO86067.1	CCP42725.1	ABL02783.1	ABM10855.1
CAM60108.1	AAS02321.1	ADT96745.1	ABL89232.1	CAC29512.1	ACC38475.1	SCY_orf00005_1	AMP23707.1	ABK73076.1	CDO86068.1	CCP42726.1	ABL02784.1	ABM10856.1
CAM60122.1	AAS02323.1	ADT96747.1	ABL89234.1	CAC29514.1	ACC38477.1	SCY_orf00008_1	AMP23708.1	ABK69994.1	CDO86070.1	CCP42728.1	ABL02786.1	ABM10858.1
CAM60127.1	AAS02328.1	ADT96753.1	ABL89237.1	CAC29519.1	ACC38482.1	SCY_orf00017_1	AMP26148.1	ABK70605.1	CDO86075.1	CCP42731.1	ABL02791.1	ABM10868.1
CAM60131.1	AAS02330.1	ADT96755.1	ABL89239.1	CAC29521.1	ACC38484.1	SCY_orf00019_1	AMP23713.1	ABK73698.1	CDO86077.1	CCP42733.1	ABL02793.1	ABM10870.1
CAM60134.1	AAS02332.1	ADT96757.1	ABL89241.1	CAC29523.1	ACC38486.1	SCY_orf00022_1	AMP23715.1	ABK69759.1	CDO86079.1	CCP42735.1	ABL02795.1	ABM10873.1
CAM60136.1	AAS02335.1	ADT96759.1	ABL89243.1	CAC29525.1	ACC38488.1	SCY_orf00026_1	AMP23717.1	ABK75101.1	CDO86081.1	CCP42737.1	ABL02797.1	ABM10875.1
CAM60137.1	AAS02336.1	ADT96760.1	ABL89244.1	CAC29526.1	ACC38489.1	SCY_orf00027_1	AMP23718.1	ABK71213.1	CDO86082.1	CCP42738.1	ABL02798.1	ABM10876.1
CAM60138.1	AAS02337.1	ADT96761.1	ABL89245.1	CAC29527.1	ACC38490.1	SCY_orf00028_1	AMP23719.1	ABK71056.1	CDO86083.1	CCP42739.1	ABL02799.1	ABM10877.1
CAM60139.1	AAS02338.1	ADT96762.1	ABL89246.1	CAC29528.1	ACC38491.1	SCY_orf00029_1	AMP23720.1	ABK72306.1	CDO86084.1	CCP42740.1	ABL02800.1	ABM10878.1
CAM60140.1	AAS02339.1	ADT96763.1	ABL89247.1	CAC29529.1	ACC38492.1	SCY_orf00031_1	AMP23721.1	ABK74891.1	CDO86085.1	CCP42741.1	ABL02801.1	ABM10879.1
CAM64996.1	AAS02362.1	ADU01849.1	ABL94666.1	CAC29536.1	ACC38524.1	SCY_orf00066_1	AMP23750.1	ABK74759.1	CDO86111.1	CCP42760.1	ABL02827.1	ABM16809.1
CAM64991.1	AAS02365.1	ADU01846.1	ABL94663.1	CAC29540.1	ACC38528.1	SCY_orf00071_1	AMP26154.1	ABK71384.1	CDO86115.1	CCP42763.1	ABL02831.1	ABM16806.1
CAM64974.1	AAS02378.1	ADU01831.1	ABL94649.1	CAC32223.1	ACC38537.1	SCY_orf00084_1	AMP23764.1	ABK73510.1	CDO86128.1	CCP42769.1	ABL02838.1	ABM16792.1
CAM64970.1	AAS02380.1	ADU01829.1	ABL94647.1	CAC32221.1	ACC38539.1	SCY_orf00085_1	AMP23766.1	ABK70467.1	CDO86130.1	CCP42771.1	ABL02840.1	ABM16790.1
CAM64969.1	AAS02381.1	ADU01828.1	ABL94646.1	CAC32220.1	ACC38540.1	SCY_orf00087_1	AMP23767.1	ABK70639.1	CDO86131.1	CCP42772.1	ABL02841.1	ABM16789.1
CAM64967.1	AAS02384.1	ADU01825.1	ABL94644.1	CAC32217.1	ACC38543.1	SCY_orf00099_1	AMP23776.1	ABK72345.1	CDO86134.1	CCP42775.1	ABL02844.1	ABM16787.1
CAM64966.1	AAS02385.1	ADU01824.1	ABL94643.1	CAC32216.1	ACC38544.1	SCY_orf00100_1	AMP23777.1	ABK71618.1	CDO86135.1	CCP42776.1	ABL02845.1	ABM16786.1
CAM64965.1	AAS02386.1	ADU01823.1	ABL94642.1	CAC32215.1	ACC38545.1	SCY_orf00103_1	AMP23778.1	ABK72284.1	CDO86136.1	CCP42777.1	ABL02846.1	ABM16785.1
CAM64964.1	AAS02387.1	ADU01822.1	ABL94641.1	CAC32214.1	ACC38546.1	SCY_orf00105_1	AMP23779.1	ABK76149.1	CDO86137.1	CCP42778.1	ABL02847.1	ABM16784.1
CAM64619.1	AAS06173.1	ADT96962.1	ABL89369.1	CAC32136.1	ACC38895.1	SCY_orf00526_1	AMP24009.1	ABK73105.1	CDO86464.1	CCP42910.1	ABL03670.1	ABM11003.1
CAM64614.1	AAS06181.1	ADT96991.1	ABL89373.1	CAC32140.1	ACC38899.1	SCY_orf00535_1	AMP24013.1	ABK73424.1	CDO86469.1	CCP42916.1	ABL03673.1	ABM11024.1
CAM64611.1	AAS06182.1	ADT96993.1	ABL89375.1	CAC32141.1	ACC38900.1	SCY_orf00538_1	AMP24014.1	ABK69823.1	CDO86470.1	CCP42917.1	ABL03674.1	ABM11026.1
CAM64571.1	AAS06196.1	ADT97018.1	ABL89403.1	CAC32156.1	ACC38918.1	SCY_orf00568_1	AMP24034.1	ABK74449.1	CDO86488.1	CCP42939.1	ABL03690.1	ABM11051.1
CAM64513.1	AAS06242.1	ADT97056.1	ABL89467.1	CAC32096.1	ACC38967.1	SCY_orf00642_1	AMP24068.1	ABK73905.1	CDO86535.1	CCP42971.1	ABL03745.1	ABM11108.1
CAM64512.1	AAS06243.1	ADT97057.1	ABL89468.1	CAC32095.1	ACC38968.1	SCY_orf00643_1	AMP26218.1	ABK70351.1	CDO86536.1	CCP42972.1	ABL03746.1	ABM11109.1
CAM64507.1	AAS06244.1	ADT97059.1	ABL89469.1	CAC32094.1	ACC38969.1	SCY_orf00646_1	AMP24069.1	ABK75628.1	CDO86537.1	CCP42973.1	ABL03747.1	ABM11114.1
CAM64500.1	AAS06246.1	ADT97069.1	ABL89477.1	CAC32092.1	ACC38970.1	SCY_orf00649_1	AMP24070.1	ABK75020.1	CDO86539.1	CCP42974.1	ABL03748.1	ABM11128.1
CAM64465.1	AAS06258.1	ADT97090.1	ABL89494.1	CAC32081.1	ACC38987.1	SCY_orf00674_1	AMP24086.1	ABK75339.1	CDO86556.1	CCP42992.1	ABL03762.1	ABM11152.1
CAM64370.1	AAS06370.1	ADT97193.1	ABL89656.1	CAC32024.1	ACC39062.1	SCY_orf00779_1	AMP24136.1	ABK71968.1	CDO86632.1	CCP43051.1	ABL03246.1	ABM11428.1
CAM64186.1	AAS06378.1	ADT97199.1	ABL89662.1	CAC32020.1	ACC39068.1	SCY_orf00790_1	AMP24140.1	ABK72771.1	CDO86641.1	CCP43064.1	ABL03250.1	ABM11442.1
CAM64367.1	AAS06380.1	ADT97205.1	ABL89667.1	CAC32019.1	ACC39072.1	SCY_orf00793_1	AMP24141.1	ABK73567.1	CDO86643.1	CCP43067.1	ABL03255.1	ABM11457.1
CAM64346.1	AAS06390.1	ADT97225.1	ABL89689.1	CAC32013.1	ACC39098.1	SCY_orf00823_1	AMP24150.1	ABK74606.1	CDO86660.1	CCP43080.1	ABL03270.1	ABM11473.1
CAM64344.1	AAS06392.1	ADT97227.1	ABL89691.1	CAC32011.1	ACC39100.1	SCY_orf00827_1	AMP24152.1	ABK72531.1	CDO86662.1	CCP43082.1	ABL03272.1	ABM11475.1
CAM64343.1	AAS06393.1	ADT97228.1	ABL89692.1	CAC32010.1	ACC39101.1	SCY_orf00828_1	AMP24153.1	ABK70298.1	CDO86663.1	CCP43083.1	ABL03273.1	ABM11476.1
CAM64338.1	AAS06403.1	ADT97239.1	ABL89705.1	CAC32007.1	ACC39106.1	SCY_orf00835_1	AMP24156.1	ABK72222.1	CDO86667.1	CCP43114.1	ABL02886.1	ABM11497.1
CAM64337.1	AAS06405.1	ADT97240.1	ABL89706.1	CAC32006.1	ACC39108.1	SCY_orf00840_1	AMP24158.1	ABK72891.1	CDO86670.1	CCP43113.1	ABL02884.1	ABM11498.1
CAM64331.1	AAS06409.1	ADT97243.1	ABL89709.1	CAC32002.1	ACC39112.1	SCY_orf00844_1	AMP24160.1	ABK70836.1	CDO86673.1	CCP43110.1	ABL02880.1	ABM11501.1
CAM64325.1	AAS06414.1	ADT97253.1	ABL89732.1	CAC29792.1	ACC39133.1	SCY_orf00854_1	AMP24173.1	ABK74818.1	CDO86689.1	CCP43090.1	ABL05128.1	ABM11510.1
CAM64322.1	AAS06419.1	ADT97257.1	ABL89742.1	CAC29788.1	ACC39141.1	SCY_orf00860_1	AMP24177.1	ABK74908.1	CDO86693.1	CCP43087.1	ABL05120.1	ABM11515.1
CAM64303.1	AAS06434.1	ADT97275.1	ABL89760.1	CAC29777.1	ACC39168.1	SCY_orf00887_1	AMP24194.1	ABK75077.1	CDO86718.1	CCP43138.1	ABL05108.1	ABM11536.1
CAM64297.1	AAS06443.1	ADT97284.1	ABL89768.1	CAC29812.1	ACC39172.1	SCY_orf00896_1	AMP24197.1	ABK71095.1	CDO86722.1	CCP43141.1	ABL05105.1	ABM11541.1
CAM64296.1	AAS06444.1	ADT97285.1	ABL89769.1	CAC29811.1	ACC39173.1	SCY_orf00898_1	AMP24198.1	ABK71181.1	CDO86723.1	CCP43142.1	ABL05104.1	ABM11542.1
CAM64292.1	AAS06447.1	ADT97288.1	ABL89772.1	CAC29808.1	ACC39176.1	SCY_orf00903_1	AMP24201.1	ABK70128.1	CDO86726.1	CCP43145.1	ABL05101.1	ABM11545.1
CAM64289.1	AAS06450.1	ADT97291.1	ABL89775.1	CAC29805.1	ACC39179.1	SCY_orf00908_1	AMP24204.1	ABK71483.1	CDO86729.1	CCP43148.1	ABL05098.1	ABM11548.1
CAM64270.1	AAS06462.1	ADT97304.1	ABL89792.1	CAC29803.1	ACC39194.1	SCY_orf00923_1	AMP24215.1	ABK72376.1	CDO86746.1	CCP43153.1	ABL05739.1	ABM11562.1
CAM64260.1	AAS06468.1	ADT97310.1	ABL89797.1	CAC30884.1	ACC39204.1	SCY_orf00931_1	AMP24219.1	ABK72853.1	CDO86752.1	CCP43160.1	ABL03921.1	ABM11570.1
CAM64259.1	AAS06469.1	ADT97311.1	ABL89798.1	CAC30882.1	ACC39205.1	SCY_orf00932_1	AMP24220.1	ABK71784.1	CDO86753.1	CCP43161.1	ABL03922.1	ABM11571.1
CAM60748.1	AAS06486.1	ADT97345.1	ABL89836.1	CAC29825.1	ACC39219.1	SCY_orf00954_1	AMP24236.1	ABK71693.1	CDO86779.1	CCP43171.1	ABL03936.1	ABM11602.1
CAM64200.1	AAS06506.1	ADT97373.1	ABL89860.1	CAC31903.1	ACC39245.1	SCY_orf00992_1	AMP24254.1	ABK74779.1	CDO86808.1	CCP43195.1	ABL04609.1	ABM11632.1
CAM64167.1	AAS06512.1	ADT97381.1	ABL89866.1	CAC31978.1	ACC39253.1	SCY_orf01001_1	AMP24260.1	ABK71785.1	CDO86814.1	CCP43201.1	ABL06493.1	ABM11640.1
CAM64159.1	AAS06515.1	ADT97383.1	ABL89869.1	CAC31974.1	ACC39257.1	SCY_orf01005_1	AMP24263.1	ABK75180.1	CDO86817.1	CCP43206.1	ABL06496.1	ABM11643.1
CAM64151.1	AAS06521.1	ADT97389.1	ABL89875.1	CAC31968.1	ACC39263.1	SCY_orf01014_1	AMP24267.1	ABK73425.1	CDO86823.1	CCP43212.1	ABL06502.1	ABM11649.1
CAM64131.1	AAS06529.1	ADT97400.1	ABL89886.1	CAC31960.1	ACC39272.1	SCY_orf01026_1	AMP24272.1	ABK76112.1	CDO86831.1	CCP43220.1	ABL06510.1	ABM11665.1
CAM64130.1	AAS06530.1	ADT97401.1	ABL89887.1	CAC31959.1	ACC39273.1	SCY_orf01027_1	AMP24273.1	ABK73438.1	CDO86832.1	CCP43221.1	ABL06511.1	ABM11666.1
CAM64123.1	AAS06531.1	ADT97402.1	ABL89888.1	CAC31958.1	ACC39274.1	SCY_orf01029_1	AMP24274.1	ABK73234.1	CDO86833.1	CCP43223.1	ABL06512.1	ABM11667.1
CAM64122.1	AAS06532.1	ADT97403.1	ABL89889.1	CAC31957.1	ACC39275.1	SCY_orf01031_1	AMP26252.1	ABK74063.1	CDO86834.1	CCP43224.1	ABL06513.1	ABM11668.1
CAM64121.1	AAS06533.1	ADT97404.1	ABL89890.1	CAC31956.1	ACC39276.1	SCY_orf01032_1	AMP24275.1	ABK72892.1	CDO86835.1	CCP43225.1	ABL06514.1	ABM11669.1
CAM64088.1	AAS06536.1	ADT97406.1	ABL89892.1	CAC31952.1	ACC39281.1	SCY_orf01039_1	AMP24280.1	ABK75000.1	CDO86838.1	CCP43230.1	ABL06518.1	ABM11670.1
CAM64087.1	AAS06537.1	ADT97407.1	ABL89893.1	CAC31951.1	ACC39282.1	SCY_orf01042_1	AMP24281.1	ABK70196.1	CDO86839.1	CCP43231.1	ABL06519.1	ABM11671.1
CAM64085.1	AAS06539.1	ADT97409.1	ABL89895.1	CAC31949.1	ACC39284.1	SCY_orf01046_1	AMP24283.1	ABK72565.1	CDO86841.1	CCP43233.1	ABL06521.1	ABM11673.1
CAM64078.1	AAS06542.1	ADT97412.1	ABL89898.1	CAC31946.1	ACC39287.1	SCY_orf01050_1	AMP24286.1	ABK71487.1	CDO86844.1	CCP43236.1	ABL06524.1	ABM11676.1
CAM64077.1	AAS06543.1	ADT97414.1	ABL89900.1	CAC31944.1	ACC39289.1	SCY_orf01051_1	AMP24287.1	ABK69550.1	CDO86845.1	CCP43238.1	ABL06526.1	ABM11678.1
CAM64069.1	AAS06547.1	ADT97417.1	ABL89903.1	CAC31940.1	ACC39293.1	SCY_orf01055_1	AMP26253.1	ABK74733.1	CDO86849.1	CCP43242.1	ABL06530.1	ABM11681.1
CAM64067.1	AAS06552.1	ADT97420.1	ABL89905.1	CAC31938.1	ACC39303.1	SCY_orf01065_1	AMP24296.1	ABK71005.1	CDO86854.1	CCP43246.1	ABL06547.1	ABM11682.1
CAM64066.1	AAS06553.1	ADT97421.1	ABL89906.1	CAC31937.1	ACC39304.1	SCY_orf01067_1	AMP26254.1	ABK74205.1	CDO86855.1	CCP43247.1	ABL06548.1	ABM11683.1
CAM64065.1	AAS06554.1	ADT97422.1	ABL89907.1	CAC31936.1	ACC39305.1	SCY_orf01068_1	AMP24297.1	ABK75236.1	CDO86856.1	CCP43248.1	ABL06549.1	ABM11684.1
CAM64064.1	AAS06555.1	ADT97423.1	ABL89908.1	CAC31935.1	ACC39306.1	SCY_orf01070_1	AMP26255.1	ABK69868.1	CDO86857.1	CCP43249.1	ABL06550.1	ABM11685.1
CAM64052.1	AAS06570.1	ADT97434.1	ABL89919.1	CAC31930.1	ACC39327.1	SCY_orf01091_1	AMP24306.1	ABK75419.1	CDO86870.1	CCP43261.1	ABL03289.1	ABM11702.1
CAM64049.1	AAS06573.1	ADT97437.1	ABL89922.1	CAC31927.1	ACC39330.1	SCY_orf01096_1	AMP24308.1	ABK73972.1	CDO86873.1	CCP43264.1	ABL03292.1	ABM11705.1
CAM64048.1	AAS06574.1	ADT97438.1	ABL89923.1	CAC31926.1	ACC39331.1	SCY_orf01097_1	AMP26259.1	ABK69958.1	CDO86874.1	CCP43265.1	ABL03293.1	ABM11706.1
CAM64047.1	AAS06575.1	ADT97439.1	ABL89924.1	CAC31925.1	ACC39332.1	SCY_orf01098_1	AMP24309.1	ABK70988.1	CDO86875.1	CCP43266.1	ABL03294.1	ABM11707.1
CAM64032.1	AAS06579.1	ADT97450.1	ABL89932.1	CAC31922.1	ACC39337.1	SCY_orf01106_1	AMP24313.1	ABK72917.1	CDO86880.1	CCP43272.1	ABL03298.1	ABM11718.1
CAM64022.1	AAS06592.1	ADT97462.1	ABL89961.1	CAC31217.1	ACC39349.1	SCY_orf01129_1	AMP24325.1	ABK71928.1	CDO86896.1	CCP43284.1	ABL03309.1	ABM11780.1
CAM64019.1	AAS06594.1	ADT97465.1	ABL89965.1	CAC31219.1	ACC39352.1	SCY_orf01132_1	AMP24327.1	ABK74961.1	CDO86898.1	CCP43286.1	ABL03312.1	ABM11785.1
CAM64009.1	AAS06600.1	ADT97494.1	ABL89974.1	CAC31784.1	ACC39356.1	SCY_orf01141_1	AMP24333.1	ABK74303.1	CDO86907.1	CCP43291.1	ABL03316.1	ABM11809.1
CAM64007.1	AAS06602.1	ADT97499.1	ABL89981.1	CAC31786.1	ACC39358.1	SCY_orf01144_1	AMP24335.1	ABK73707.1	CDO86911.1	CCP43293.1	ABL03318.1	ABM11813.1
CAM64006.1	AAS06603.1	ADT97500.1	ABL89982.1	CAC31787.1	ACC39359.1	SCY_orf01145_1	AMP24336.1	ABK74778.1	CDO86912.1	CCP43294.1	ABL03319.1	ABM11814.1
CAM64004.1	AAS06605.1	ADT97504.1	ABL89993.1	CAC31789.1	ACC39364.1	SCY_orf01149_1	AMP26261.1	ABK73034.1	CDO86915.1	CCP43296.1	ABL03324.1	ABM11821.1
CAM64003.1	AAS06607.1	ADT97508.1	ABL90000.1	CAC31792.1	ACC39367.1	SCY_orf01152_1	AMP26262.1	ABK72592.1	CDO86918.1	CCP43299.1	ABL03327.1	ABM11829.1
CAM64002.1	AAS06608.1	ADT97509.1	ABL90001.1	CAC31793.1	ACC39368.1	SCY_orf01153_1	AMP24340.1	ABK72053.1	CDO86919.1	CCP43300.1	ABL03328.1	ABM11830.1
CAM64001.1	AAS06609.1	ADT97510.1	ABL90002.1	CAC31794.1	ACC39369.1	SCY_orf01154_1	AMP24341.1	ABK73166.1	CDO86920.1	CCP43301.1	ABL03329.1	ABM11831.1
CAM63973.1	AAS06656.1	ADU01094.1	ABL90148.1	CAC30865.1	ACC39423.1	SCY_orf01204_1	AMP24359.1	ABK73465.1	CDO86955.1	CCP43377.1	ABL03370.1	ABM12064.1
CAM63971.1	AAS06658.1	ADU01092.1	ABL90150.1	CAC30863.1	ACC39425.1	SCY_orf01207_1	AMP24361.1	ABK74163.1	CDO86957.1	CCP43379.1	ABL03372.1	ABM12066.1
CAM63968.1	AAS06661.1	ADU01089.1	ABL90153.1	CAC30860.1	ACC39428.1	SCY_orf01212_1	AMP24364.1	ABK69725.1	CDO86960.1	CCP43382.1	ABL03375.1	ABM12069.1
CAM63967.1	AAS06662.1	ADU01088.1	ABL90154.1	CAC30859.1	ACC39429.1	SCY_orf01213_1	AMP24365.1	ABK76087.1	CDO86961.1	CCP43383.1	ABL03376.1	ABM12070.1
CAM63966.1	AAS06663.1	ADU01087.1	ABL90155.1	CAC30858.1	ACC39430.1	SCY_orf01214_1	AMP26268.1	ABK75379.1	CDO86962.1	CCP43384.1	ABL03377.1	ABM12071.1
CAM63953.1	AAS06669.1	ADU01083.1	ABL90186.1	CAC30852.1	ACC39438.1	SCY_orf01225_1	AMP24373.1	ABK73982.1	CDO86971.1	CCP43390.1	ABL03382.1	ABM12076.1
CAM63951.1	AAS06675.1	ADU01073.1	ABL90198.1	CAC30850.1	ACC39446.1	SCY_orf01234_1	AMP26271.1	ABK75311.1	CDO86978.1	CCP43394.1	ABL03388.1	ABM12087.1
CAM63950.1	AAS06676.1	ADU01072.1	ABL90199.1	CAC30849.1	ACC39447.1	SCY_orf01235_1	AMP24377.1	ABK70799.1	CDO86979.1	CCP43395.1	ABL03389.1	ABM12088.1
CAM63945.1	AAS06679.1	ADU01071.1	ABL90200.1	CAC30846.1	ACC39450.1	SCY_orf01240_1	AMP24380.1	ABK72533.1	CDO86982.1	CCP43398.1	ABL03392.1	ABM12089.1
CAM63943.1	AAS06680.1	ADU01069.1	ABL90201.1	CAC30845.1	ACC39451.1	SCY_orf01242_1	AMP24381.1	ABK70312.1	CDO86983.1	CCP43410.1	ABL03393.1	ABM12092.1
CAM63942.1	AAS06681.1	ADU01068.1	ABL90202.1	CAC30844.1	ACC39452.1	SCY_orf01243_1	AMP24382.1	ABK71951.1	CDO86984.1	CCP43411.1	ABL03394.1	ABM12093.1
CAM63925.1	AAS06690.1	ADU01051.1	ABL90216.1	CAC30834.1	ACC39468.1	SCY_orf01262_1	AMP24390.1	ABK73485.1	CDO86994.1	CCP43425.1	ABL03408.1	ABM12113.1
CAM63924.1	AAS06691.1	ADU01050.1	ABL90217.1	CAC30833.1	ACC39469.1	SCY_orf01263_1	AMP24391.1	ABK74236.1	CDO86995.1	CCP43426.1	ABL03409.1	ABM12114.1
CAM63922.1	AAS06693.1	ADU01048.1	ABL90219.1	CAC30831.1	ACC39471.1	SCY_orf01266_1	AMP24393.1	ABK73271.1	CDO86997.1	CCP43428.1	ABL03411.1	ABM12116.1
CAM63896.1	AAS06710.1	ADU01024.1	ABL90243.1	CAC30818.1	ACC39488.1	SCY_orf01302_1	AMP24407.1	ABK75640.1	CDO87017.1	CCP43444.1	ABL03431.1	ABM12138.1
CAM63895.1	AAS06711.1	ADU01023.1	ABL90244.1	CAC30817.1	ACC39489.1	SCY_orf01304_1	AMP24408.1	ABK75373.1	CDO87018.1	CCP43445.1	ABL03432.1	ABM12139.1
CAM63894.1	AAS06712.1	ADU01022.1	ABL90245.1	CAC30816.1	ACC39490.1	SCY_orf01306_1	AMP24409.1	ABK72271.1	CDO87019.1	CCP43446.1	ABL03433.1	ABM12140.1
CAM63893.1	AAS06713.1	ADU01021.1	ABL90246.1	CAC30815.1	ACC39491.1	SCY_orf01308_1	AMP24410.1	ABK70487.1	CDO87020.1	CCP43447.1	ABL03434.1	ABM12141.1
CAM63892.1	AAS06714.1	ADU01020.1	ABL90247.1	CAC30814.1	ACC39492.1	SCY_orf01309_1	AMP24411.1	ABK74446.1	CDO87021.1	CCP43448.1	ABL03435.1	ABM12142.1
CAM63891.1	AAS06715.1	ADU01019.1	ABL90248.1	CAC30813.1	ACC39493.1	SCY_orf01310_1	AMP24412.1	ABK73644.1	CDO87022.1	CCP43449.1	ABL03436.1	ABM12143.1
CAM63890.1	AAS06716.1	ADU01018.1	ABL90249.1	CAC30812.1	ACC39494.1	SCY_orf01312_1	AMP24413.1	ABK71298.1	CDO87023.1	CCP43450.1	ABL03437.1	ABM12144.1
CAM63889.1	AAS06717.1	ADU01017.1	ABL90250.1	CAC30811.1	ACC39495.1	SCY_orf01313_1	AMP24414.1	ABK75343.1	CDO87024.1	CCP43451.1	ABL03438.1	ABM12145.1
CAM63888.1	AAS06718.1	ADU01016.1	ABL90251.1	CAC30810.1	ACC39496.1	SCY_orf01315_1	AMP24415.1	ABK74245.1	CDO87025.1	CCP43452.1	ABL03439.1	ABM12146.1
CAM63887.1	AAS06719.1	ADU01015.1	ABL90252.1	CAC30809.1	ACC39497.1	SCY_orf01316_1	AMP24416.1	ABK73490.1	CDO87026.1	CCP43453.1	ABL03440.1	ABM12147.1
CAM63886.1	AAS06720.1	ADU01014.1	ABL90253.1	CAC30808.1	ACC39498.1	SCY_orf01317_1	AMP24417.1	ABK72361.1	CDO87027.1	CCP43454.1	ABL03441.1	ABM12148.1
CAM63882.1	AAS06727.1	ADU01011.1	ABL90256.1	CAC30803.1	ACC39503.1	SCY_orf01331_1	AMP24419.1	ABK72408.1	CDO87037.1	CCP43458.1	ABL03444.1	ABM12166.1
CAM63881.1	AAS06728.1	ADU01010.1	ABL90257.1	CAC30802.1	ACC39504.1	SCY_orf01333_1	AMP24420.1	ABK73139.1	CDO87038.1	CCP43459.1	ABL03445.1	ABM12167.1
CAM63880.1	AAS06729.1	ADU01009.1	ABL90258.1	CAC30801.1	ACC39505.1	SCY_orf01335_1	AMP24421.1	ABK75083.1	CDO87039.1	CCP43460.1	ABL03446.1	ABM12168.1
CAM63879.1	AAS06730.1	ADU01008.1	ABL90259.1	CAC30800.1	ACC39506.1	SCY_orf01336_1	AMP24422.1	ABK70541.1	CDO87040.1	CCP43461.1	ABL03447.1	ABM12169.1
CAM63873.1	AAS06731.1	ADU01007.1	ABL90260.1	CAC30799.1	ACC39507.1	SCY_orf01337_1	AMP24423.1	ABK75423.1	CDO87041.1	CCP43462.1	ABL03448.1	ABM12170.1
CAM63872.1	AAS06732.1	ADU01006.1	ABL90261.1	CAC30798.1	ACC39508.1	SCY_orf01338_1	AMP24424.1	ABK73224.1	CDO87042.1	CCP43463.1	ABL03449.1	ABM12171.1
CAM63871.1	AAS06733.1	ADU01005.1	ABL90262.1	CAC30797.1	ACC39509.1	SCY_orf01339_1	AMP26281.1	ABK74050.1	CDO87043.1	CCP43464.1	ABL03450.1	ABM12172.1
CAM63870.1	AAS06734.1	ADU01004.1	ABL90263.1	CAC30796.1	ACC39510.1	SCY_orf01340_1	AMP24425.1	ABK71824.1	CDO87044.1	CCP43465.1	ABL03451.1	ABM12173.1
CAM63869.1	AAS06735.1	ADU01003.1	ABL90264.1	CAC30795.1	ACC39511.1	SCY_orf01341_1	AMP24426.1	ABK75416.1	CDO87045.1	CCP43466.1	ABL03452.1	ABM12174.1
CAM63868.1	AAS06736.1	ADU01002.1	ABL90265.1	CAC30794.1	ACC39512.1	SCY_orf01342_1	AMP24427.1	ABK72911.1	CDO87046.1	CCP43467.1	ABL03453.1	ABM12175.1
CAM63859.1	AAS06748.1	ADU00996.1	ABL90276.1	CAC30787.1	ACC39526.1	SCY_orf01369_1	AMP24444.1	ABK75688.1	CDO87066.1	CCP43477.1	ABL03466.1	ABM12181.1
CAM63858.1	AAS06749.1	ADU00995.1	ABL90277.1	CAC30786.1	ACC39527.1	SCY_orf01371_1	AMP24445.1	ABK75327.1	CDO87067.1	CCP43478.1	ABL03467.1	ABM12182.1
CAM63857.1	AAS06750.1	ADU00994.1	ABL90278.1	CAC30785.1	ACC39528.1	SCY_orf01372_1	AMP24446.1	ABK74459.1	CDO87068.1	CCP43479.1	ABL03468.1	ABM12183.1
CAM63854.1	AAS06775.1	ADU00981.1	ABL90296.1	CAC30919.1	ACC39538.1	SCY_orf01400_1	AMP24464.1	ABK70086.1	CDO87090.1	CCP46286.1	ABL03478.1	ABM12199.1
CAM63849.1	AAS06778.1	ADU00948.1	ABL90338.1	CAC30917.1	ACC39541.1	SCY_orf01409_1	AMP24469.1	ABK74732.1	CDO87095.1	CCP46284.1	ABL03481.1	ABM12265.1
CAM63847.1	AAS06780.1	ADU00946.1	ABL90340.1	CAC30915.1	ACC39543.1	SCY_orf01411_1	AMP24471.1	ABK76170.1	CDO87096.1	CCP46282.1	ABL03483.1	ABM12267.1
CAM63846.1	AAS06781.1	ADU00945.1	ABL90341.1	CAC30914.1	ACC39544.1	SCY_orf01413_1	AMP24472.1	ABK69610.1	CDO87097.1	CCP46281.1	ABL03484.1	ABM12268.1
CAM63845.1	AAS06782.1	ADU00944.1	ABL90342.1	CAC30913.1	ACC39545.1	SCY_orf01414_1	AMP24473.1	ABK70484.1	CDO87098.1	CCP46280.1	ABL03485.1	ABM12269.1
CAM63844.1	AAS06783.1	ADU00943.1	ABL90343.1	CAC30912.1	ACC39546.1	SCY_orf01415_1	AMP24474.1	ABK71739.1	CDO87099.1	CCP46279.1	ABL03486.1	ABM12270.1
CAM63843.1	AAS06784.1	ADU00942.1	ABL90344.1	CAC30911.1	ACC39547.1	SCY_orf01416_1	AMP24475.1	ABK73583.1	CDO87100.1	CCP46278.1	ABL03487.1	ABM12271.1
CAM63842.1	AAS06785.1	ADU00941.1	ABL90345.1	CAC30910.1	ACC39548.1	SCY_orf01417_1	AMP24476.1	ABK75374.1	CDO87101.1	CCP46277.1	ABL03488.1	ABM12272.1
CAM63826.1	AAS06795.1	ADU00924.1	ABL90360.1	CAC29872.1	ACC39562.1	SCY_orf01431_1	AMP24486.1	ABK73633.1	CDO87113.1	CCP46265.1	ABL03500.1	ABM12301.1
CAM63825.1	AAS06796.1	ADU00923.1	ABL90361.1	CAC29873.1	ACC39563.1	SCY_orf01432_1	AMP26288.1	ABK70660.1	CDO87114.1	CCP46264.1	ABL03501.1	ABM12302.1
CAM63824.1	AAS06797.1	ADU00921.1	ABL90364.1	CAC29874.1	ACC39564.1	SCY_orf01433_1	AMP24487.1	ABK70035.1	CDO87115.1	CCP46263.1	ABL03502.1	ABM12304.1
CAM63817.1	AAS06803.1	ADU00913.1	ABL90369.1	CAC29879.1	ACC39570.1	SCY_orf01440_1	AMP24494.1	ABK71697.1	CDO87120.1	CCP46258.1	ABL03506.1	ABM12312.1
CAM63815.1	AAS06806.1	ADU00910.1	ABL90374.1	CAC29881.1	ACC39573.1	SCY_orf01451_1	AMP26290.1	ABK71240.1	CDO87125.1	CCP46255.1	ABL03509.1	ABM12314.1
CAM63811.1	AAS06810.1	ADU00906.1	ABL90378.1	CAC29885.1	ACC39577.1	SCY_orf01458_1	AMP24501.1	ABK76013.1	CDO87129.1	CCP46244.1	ABL03513.1	ABM12318.1
CAM63808.1	AAS06813.1	ADU00903.1	ABL90381.1	CAC29887.1	ACC39580.1	SCY_orf01467_1	AMP24503.1	ABK75193.1	CDO87132.1	CCP46241.1	ABL03516.1	ABM12321.1
CAM63806.1	AAS06814.1	ADU00899.1	ABL90383.1	CAC29888.1	ACC39581.1	SCY_orf01468_1	AMP26292.1	ABK72614.1	CDO87133.1	CCP46240.1	ABL03517.1	ABM12326.1
CAM63805.1	AAS06815.1	ADU00898.1	ABL90384.1	CAC29889.1	ACC39582.1	SCY_orf01470_1	AMP24504.1	ABK71399.1	CDO87134.1	CCP46239.1	ABL03518.1	ABM12327.1
CAM63800.1	AAS06823.1	ADU00888.1	ABL90391.1	CAC29890.1	ACC39589.1	SCY_orf01488_1	AMP24510.1	ABK73466.1	CDO87189.1	CCP46238.1	ABL03524.1	ABM12338.1
CAM63796.1	AAS06827.1	ADU00884.1	ABL90395.1	CAC29894.1	ACC39593.1	SCY_orf01493_1	AMP24514.1	ABK72334.1	CDO87193.1	CCP46234.1	ABL03528.1	ABM12342.1
CAM63795.1	AAS06828.1	ADU00883.1	ABL90396.1	CAC29895.1	ACC39594.1	SCY_orf01494_1	AMP24515.1	ABK69632.1	CDO87194.1	CCP46233.1	ABL03529.1	ABM12343.1
CAM63794.1	AAS06829.1	ADU00882.1	ABL90397.1	CAC29896.1	ACC39595.1	SCY_orf01495_1	AMP26295.1	ABK75325.1	CDO87195.1	CCP46232.1	ABL03530.1	ABM12344.1
CAM63793.1	AAS06830.1	ADU00880.1	ABL90399.1	CAC29897.1	ACC39597.1	SCY_orf01496_1	AMP24516.1	ABK75676.1	CDO87196.1	CCP46231.1	ABL03532.1	ABM12346.1
CAM63792.1	AAS06039.1	ADU00877.1	ABL90402.1	CAC29903.1	ACC39606.1	SCY_orf01507_1	AMP24524.1	ABK72990.1	CDO87207.1	CCP46218.1	ABL03542.1	ABM12348.1
CAM63776.1	AAS06024.1	ADU00866.1	ABL90415.1	CAC29927.1	ACC39621.1	SCY_orf01528_1	AMP24538.1	ABK71064.1	CDO87222.1	CCP46187.1	ABL05138.1	ABM12364.1
CAM63766.1	AAS06013.1	ADU00853.1	ABL90433.1	CAC30183.1	ACC39634.1	SCY_orf01550_1	AMP24545.1	ABK69727.1	CDO87233.1	CCP46177.1	ABL03962.1	ABM12380.1
CAM63762.1	AAS06008.1	ADU00850.1	ABL90436.1	CAC30191.1	ACC39642.1	SCY_orf01565_1	AMP24550.1	ABK71400.1	CDO87240.1	CCP46162.1	ABL03970.1	ABM12383.1
CAM63760.1	AAS06006.1	ADT99420.1	ABL90438.1	CAC32204.1	ACC38628.1	SCY_orf01570_1	AMP24551.1	ABK69615.1	CDO87242.1	CCP42789.1	ABL06825.1	ABM14013.1
CAM63757.1	AAS06003.1	ADU00845.1	ABL90441.1	CAC30195.1	ACC39646.1	SCY_orf01574_1	AMP24552.1	ABK73939.1	CDO87245.1	CCP46157.1	ABL03973.1	ABM12390.1
CAM63750.1	AAS05994.1	ADU00818.1	ABL90456.1	CAC30205.1	ACC39658.1	SCY_orf01596_1	AMP24564.1	ABK72004.1	CDO87265.1	CCP46139.1	ABL03916.1	ABM12415.1
CAM63749.1	AAS05993.1	ADU00817.1	ABL90457.1	CAC30206.1	ACC39659.1	SCY_orf01597_1	AMP24565.1	ABK70261.1	CDO87266.1	CCP46138.1	ABL03915.1	ABM12416.1
CAM63748.1	AAS05992.1	ADU00816.1	ABL90458.1	CAC30207.1	ACC39660.1	SCY_orf01599_1	AMP24566.1	ABK75821.1	CDO87267.1	CCP46137.1	ABL03914.1	ABM12417.1
CAM63747.1	AAS05991.1	ADU00815.1	ABL90459.1	CAC30208.1	ACC39661.1	SCY_orf01600_1	AMP24567.1	ABK73751.1	CDO87268.1	CCP46136.1	ABL03913.1	ABM12418.1
CAM63734.1	AAS05979.1	ADU00799.1	ABL90473.1	CAC30216.1	ACC39677.1	SCY_orf01625_1	AMP24577.1	ABK72550.1	CDO87284.1	CCP46126.1	ABL04994.1	ABM12439.1
CAM63729.1	AAS05973.1	ADU00792.1	ABL90479.1	CAC30222.1	ACC39683.1	SCY_orf01636_1	AMP24579.1	ABK70819.1	CDO87290.1	CCP46121.1	ABL04988.1	ABM12449.1
CAM63717.1	AAS05954.1	ADU00754.1	ABL90518.1	CAC30235.1	ACC39709.1	SCY_orf01670_1	AMP24592.1	ABK71291.1	CDO87307.1	CCP46104.1	ABL04965.1	ABM12493.1
CAM63715.1	AAS05952.1	ADU00750.1	ABL90520.1	CAC30237.1	ACC39711.1	SCY_orf01673_1	AMP24594.1	ABK74640.1	CDO87309.1	CCP46102.1	ABL04963.1	ABM12498.1
CAM63705.1	AAS05949.1	ADU00744.1	ABL90523.1	CAC30240.1	ACC39714.1	SCY_orf01678_1	AMP24597.1	ABK74100.1	CDO87315.1	CCP46099.1	ABL04960.1	ABM12506.1
CAM63699.1	AAS05946.1	ADU00671.1	ABL90525.1	CAC30242.1	ACC39716.1	SCY_orf01681_1	AMP24600.1	ABK73498.1	CDO87318.1	CCP46097.1	ABL04958.1	ABM12531.1
CAM63694.1	AAS05944.1	ADU00666.1	ABL90527.1	CAC30244.1	ACC39718.1	SCY_orf01683_1	AMP24602.1	ABK72441.1	CDO87320.1	CCP46095.1	ABL04956.1	ABM12537.1
CAM63693.1	AAS05943.1	ADU00665.1	ABL90528.1	CAC30245.1	ACC39719.1	SCY_orf01684_1	AMP24603.1	ABK69591.1	CDO87321.1	CCP46094.1	ABL04955.1	ABM12538.1
CAM63692.1	AAS05942.1	ADU00663.1	ABL90529.1	CAC30246.1	ACC39720.1	SCY_orf01685_1	AMP24604.1	ABK73231.1	CDO87322.1	CCP46093.1	ABL04954.1	ABM12542.1
CAM63683.1	AAS05925.1	ADU00652.1	ABL90552.1	CAC30267.1	ACC39738.1	SCY_orf01714_1	AMP24639.1	ABK69662.1	CDO87339.1	CCP46081.1	ABL04938.1	ABM12555.1
CAM63682.1	AAS05924.1	ADU00651.1	ABL90553.1	CAC30268.1	ACC39739.1	SCY_orf01715_1	AMP26309.1	ABK71517.1	CDO87340.1	CCP46080.1	ABL04937.1	ABM12556.1
CAM63681.1	AAS05922.1	ADU00650.1	ABL90554.1	CAC30269.1	ACC39740.1	SCY_orf01716_1	AMP26310.1	ABK74322.1	CDO87341.1	CCP46079.1	ABL04936.1	ABM12557.1
CAM63680.1	AAS05921.1	ADU00649.1	ABL90555.1	CAC30270.1	ACC39741.1	SCY_orf01717_1	AMP26311.1	ABK75622.1	CDO87342.1	CCP46078.1	ABL04935.1	ABM12558.1
CAM63678.1	AAS05919.1	ADU00647.1	ABL90557.1	CAC30272.1	ACC39743.1	SCY_orf01719_1	AMP24641.1	ABK74904.1	CDO87344.1	CCP46076.1	ABL04933.1	ABM12560.1
CAM63666.1	AAS05910.1	ADU00632.1	ABL90577.1	CAC30282.1	ACC39757.1	SCY_orf01740_1	AMP24650.1	ABK69775.1	CDO87355.1	CCP46065.1	ABL04920.1	ABM12575.1
CAM63665.1	AAS05909.1	ADU00631.1	ABL90578.1	CAC30283.1	ACC39758.1	SCY_orf01741_1	AMP24651.1	ABK75150.1	CDO87356.1	CCP46064.1	ABL04919.1	ABM12576.1
CAM63658.1	AAS05905.1	ADU00626.1	ABL90582.1	CAC30287.1	ACC39762.1	SCY_orf01748_1	AMP26316.1	ABK75329.1	CDO87370.1	CCP46060.1	ABL04915.1	ABM12583.1
CAM63655.1	AAS05904.1	ADU00625.1	ABL90583.1	CAC30288.1	ACC39763.1	SCY_orf01750_1	AMP24655.1	ABK74020.1	CDO87371.1	CCP46059.1	ABL04914.1	ABM12584.1
CAM63623.1	AAS05885.1	ADU00617.1	ABL90591.1	CAC30300.1	ACC39777.1	SCY_orf01792_1	AMP24666.1	ABK71190.1	CDO87395.1	CCP46047.1	ABL04903.1	ABM12592.1
CAM63617.1	AAS05872.1	ADU00607.1	ABL90611.1	CAC30312.1	ACC39795.1	SCY_orf01823_1	AMP26321.1	ABK75917.1	CDO87413.1	CCP46037.1	ABL04886.1	ABM12602.1
CAM63616.1	AAS05871.1	ADU00606.1	ABL90612.1	CAC30313.1	ACC39796.1	SCY_orf01825_1	AMP24679.1	ABK70703.1	CDO87414.1	CCP46036.1	ABL04885.1	ABM12603.1
CAM63615.1	AAS05870.1	ADU00605.1	ABL90613.1	CAC30314.1	ACC39797.1	SCY_orf01827_1	AMP24680.1	ABK73587.1	CDO87415.1	CCP46035.1	ABL04884.1	ABM12604.1
CAM63607.1	AAS05862.1	ADU00596.1	ABL90623.1	CAC30321.1	ACC39805.1	SCY_orf01840_1	AMP24688.1	ABK71608.1	CDO87423.1	CCP46027.1	ABL04876.1	ABM12613.1
CAM63603.1	AAS05858.1	ADU00592.1	ABL90627.1	CAC30325.1	ACC39809.1	SCY_orf01848_1	AMP24691.1	ABK72683.1	CDO87427.1	CCP46023.1	ABL04872.1	ABM12617.1
CAM63602.1	AAS05857.1	ADU00591.1	ABL90628.1	CAC30326.1	ACC39810.1	SCY_orf01849_1	AMP24692.1	ABK71732.1	CDO87428.1	CCP46022.1	ABL04871.1	ABM12618.1
CAM63601.1	AAS05856.1	ADU00590.1	ABL90629.1	CAC30327.1	ACC39811.1	SCY_orf01850_1	AMP24693.1	ABK69677.1	CDO87429.1	CCP46021.1	ABL04870.1	ABM12619.1
CAM63600.1	AAS05855.1	ADU00589.1	ABL90630.1	CAC30328.1	ACC39812.1	SCY_orf01851_1	AMP24694.1	ABK73961.1	CDO87430.1	CCP46020.1	ABL04869.1	ABM12620.1
CAM63587.1	AAS05847.1	ADU00580.1	ABL90639.1	CAC30146.1	ACC39823.1	SCY_orf01862_1	AMP24700.1	ABK71856.1	CDO87439.1	CCP46012.1	ABL04855.1	ABM12629.1
CAM63584.1	AAS05846.1	ADU00578.1	ABL90640.1	CAC30148.1	ACC39824.1	SCY_orf01865_1	AMP24701.1	ABK72788.1	CDO87441.1	CCP46011.1	ABL04854.1	ABM12631.1
CAM63577.1	AAS05843.1	ADU00575.1	ABL90643.1	CAC30151.1	ACC39828.1	SCY_orf01871_1	AMP24703.1	ABK70869.1	CDO87445.1	CCP46007.1	ABL04850.1	ABM12634.1
CAM63575.1	AAS05842.1	ADU00574.1	ABL90644.1	CAC30152.1	ACC39829.1	SCY_orf01873_1	AMP24704.1	ABK74188.1	CDO87446.1	CCP46006.1	ABL04849.1	ABM12635.1
CAM63574.1	AAS05841.1	ADU00573.1	ABL90645.1	CAC30153.1	ACC39830.1	SCY_orf01874_1	AMP24705.1	ABK69686.1	CDO87447.1	CCP46005.1	ABL04848.1	ABM12636.1
CAM63563.1	AAS05737.1	ADU00449.1	ABL90834.1	CAC30169.1	ACC39960.1	SCY_orf02019_1	AMP24799.1	ABK72916.1	CDO87543.1	CCP45951.1	ABL04784.1	ABM12726.1
CAM63562.1	AAS05736.1	ADU00448.1	ABL90835.1	CAC30170.1	ACC39961.1	SCY_orf02020_1	AMP24800.1	ABK74880.1	CDO87544.1	CCP45950.1	ABL04783.1	ABM12727.1
CAM63554.1	AAS05723.1	ADU00444.1	ABL90840.1	CAC30176.1	ACC39978.1	SCY_orf02028_1	AMP24805.1	ABK75341.1	CDO87557.1	CCP45915.1	ABL04765.1	ABM12731.1
CAM63551.1	AAS05720.1	ADU00441.1	ABL90843.1	CAC30178.1	ACC39981.1	SCY_orf02033_1	AMP26343.1	ABK75994.1	CDO87560.1	CCP45912.1	ABL04762.1	ABM12734.1
CAM63549.1	AAS05718.1	ADU00439.1	ABL90845.1	CAC30180.1	ACC39983.1	SCY_orf02037_1	AMP26344.1	ABK75588.1	CDO87562.1	CCP45910.1	ABL04760.1	ABM12736.1
CAM63441.1	AAS05611.1	ADU00216.1	ABL91113.1	CAC30667.1	ACC40132.1	SCY_orf02254_1	AMP26382.1	ABK71455.1	CDO87750.1	CCP45839.1	ABL04377.1	ABM12912.1
CAM63440.1	AAS05610.1	ADU00215.1	ABL91114.1	CAC30666.1	ACC40133.1	SCY_orf02256_1	AMP24936.1	ABK72111.1	CDO87751.1	CCP45838.1	ABL04378.1	ABM12913.1
CAM63439.1	AAS05609.1	ADU00214.1	ABL91115.1	CAC30665.1	ACC40134.1	SCY_orf02257_1	AMP24937.1	ABK71437.1	CDO87752.1	CCP45837.1	ABL04379.1	ABM12914.1
CAM63438.1	AAS05608.1	ADU00213.1	ABL91116.1	CAC30664.1	ACC40135.1	SCY_orf02259_1	AMP24938.1	ABK73592.1	CDO87753.1	CCP45836.1	ABL04380.1	ABM12915.1
CAM63433.1	AAS05606.1	ADU00210.1	ABL91120.1	CAC30661.1	ACC40139.1	SCY_orf02264_1	AMP24940.1	ABK74642.1	CDO87759.1	CCP45833.1	ABL04383.1	ABM12920.1
CAM63432.1	AAS05605.1	ADU00209.1	ABL91121.1	CAC30660.1	ACC40140.1	SCY_orf02265_1	AMP26384.1	ABK75776.1	CDO87760.1	CCP45832.1	ABL04384.1	ABM12921.1
CAM63419.1	AAS05595.1	ADU00202.1	ABL91134.1	CAC30657.1	ACC40149.1	SCY_orf02285_1	AMP24946.1	ABK73781.1	CDO87768.1	CCP45819.1	ABL04391.1	ABM12928.1
CAM63418.1	AAS05594.1	ADU00201.1	ABL91135.1	CAC30656.1	ACC40150.1	SCY_orf02286_1	AMP24947.1	ABK75542.1	CDO87769.1	CCP45818.1	ABL04392.1	ABM12929.1
CAM63417.1	AAS05593.1	ADU00200.1	ABL91136.1	CAC30655.1	ACC40151.1	SCY_orf02287_1	AMP24948.1	ABK74646.1	CDO87770.1	CCP45817.1	ABL04393.1	ABM12930.1
CAM63410.1	AAS05590.1	ADU00198.1	ABL91139.1	CAC30653.1	ACC40153.1	SCY_orf02293_1	AMP24950.1	ABK74332.1	CDO87777.1	CCP45815.1	ABL04395.1	ABM12932.1
CAM63409.1	AAS05589.1	ADU00196.1	ABL91148.1	CAC30652.1	ACC40155.1	SCY_orf02295_1	AMP26387.1	ABK70476.1	CDO87778.1	CCP45812.1	ABL04396.1	ABM12934.1
CAM63399.1	AAS05586.1	ADU00193.1	ABL91151.1	CAC30649.1	ACC40159.1	SCY_orf02301_1	AMP24953.1	ABK75104.1	CDO87781.1	CCP45809.1	ABL04400.1	ABM12937.1
CAM63398.1	AAS05585.1	ADU00192.1	ABL91152.1	CAC30648.1	ACC40160.1	SCY_orf02304_1	AMP24954.1	ABK72789.1	CDO87782.1	CCP45808.1	ABL04401.1	ABM12938.1
CAM63397.1	AAS05584.1	ADU00191.1	ABL91153.1	CAC30647.1	ACC40161.1	SCY_orf02305_1	AMP26388.1	ABK74365.1	CDO87783.1	CCP45807.1	ABL04402.1	ABM12939.1
CAM63380.1	AAS05581.1	ADU00188.1	ABL91155.1	CAC30645.1	ACC40164.1	SCY_orf02311_1	AMP24957.1	ABK73422.1	CDO87785.1	CCP45801.1	ABL04404.1	ABM12943.1
CAM63379.1	AAS05580.1	ADU00187.1	ABL91156.1	CAC30644.1	ACC40165.1	SCY_orf02313_1	AMP24958.1	ABK71356.1	CDO87786.1	CCP45800.1	ABL04405.1	ABM12944.1
CAM63375.1	AAS05578.1	ADU00184.1	ABL91163.1	CAC30642.1	ACC40167.1	SCY_orf02319_1	AMP24960.1	ABK74401.1	CDO87787.1	CCP45798.1	ABL04406.1	ABM12947.1
CAM63374.1	AAS05577.1	ADU00183.1	ABL91164.1	CAC30641.1	ACC40168.1	SCY_orf02320_1	AMP24961.1	ABK74186.1	CDO87788.1	CCP45797.1	ABL04407.1	ABM12948.1
CAM63370.1	AAS05574.1	ADU00181.1	ABL91166.1	CAC30638.1	ACC40175.1	SCY_orf02325_1	AMP24964.1	ABK71381.1	CDO87791.1	CCP45793.1	ABL04415.1	ABM12950.1
CAM63369.1	AAS05573.1	ADU00180.1	ABL91167.1	CAC30637.1	ACC40176.1	SCY_orf02326_1	AMP24965.1	ABK72705.1	CDO87792.1	CCP45792.1	ABL04416.1	ABM12951.1
CAM63366.1	AAS05570.1	ADU00177.1	ABL91170.1	CAC30634.1	ACC40179.1	SCY_orf02330_1	AMP24967.1	ABK72018.1	CDO87795.1	CCP45789.1	ABL04419.1	ABM12954.1
CAM63364.1	AAS05568.1	ADU00175.1	ABL91172.1	CAC30632.1	ACC40181.1	SCY_orf02332_1	AMP24970.1	ABK72209.1	CDO87797.1	CCP45787.1	ABL04421.1	ABM12956.1
CAM63362.1	AAS05567.1	ADU00173.1	ABL91174.1	CAC30631.1	ACC40182.1	SCY_orf02333_1	AMP24971.1	ABK70518.1	CDO87798.1	CCP45786.1	ABL04422.1	ABM12958.1
CAM63359.1	AAS05564.1	ADU00169.1	ABL91178.1	CAC30628.1	ACC40186.1	SCY_orf02336_1	AMP24973.1	ABK71961.1	CDO87801.1	CCP45781.1	ABL04426.1	ABM12967.1
CAM63344.1	AAS05552.1	ADU00155.1	ABL91187.1	CAC30619.1	ACC40197.1	SCY_orf02365_1	AMP24983.1	ABK74399.1	CDO87816.1	CCP45772.1	ABL04434.1	ABM12979.1
CAM63335.1	AAS05550.1	ADU00150.1	ABL91190.1	CAC30616.1	ACC40200.1	SCY_orf02369_1	AMP24986.1	ABK74741.1	CDO87819.1	CCP45769.1	ABL04436.1	ABM12982.1
CAM63334.1	AAS05314.1	ADU00148.1	ABL91192.1	CAC30614.1	ACC40229.1	SCY_orf02413_1	AMP25001.1	ABK69728.1	CDO87839.1	CCP45730.1	ABL04465.1	ABM12984.1
CAM63332.1	AAS05312.1	ADU00146.1	ABL91194.1	CAC30612.1	ACC40231.1	SCY_orf02415_1	AMP25002.1	ABK72959.1	CDO87841.1	CCP45728.1	ABL04467.1	ABM12986.1
CAM63331.1	AAS05311.1	ADU00145.1	ABL91195.1	CAC30611.1	ACC40232.1	SCY_orf02416_1	AMP25003.1	ABK72450.1	CDO87842.1	CCP45727.1	ABL04468.1	ABM12987.1
CAM63322.1	AAS05307.1	ADU00142.1	ABL91198.1	CAC30580.1	ACC40234.1	SCY_orf02425_1	AMP25008.1	ABK74599.1	CDO87848.1	CCP45724.1	ABL04470.1	ABM12990.1
CAM63317.1	AAS05306.1	ADU00140.1	ABL91200.1	CAC30579.1	ACC40235.1	SCY_orf02431_1	AMP25009.1	ABK75549.1	CDO87849.1	CCP45723.1	ABL04471.1	ABM12992.1
CAM60743.1	AAS05302.1	ADT97341.1	ABL89831.1	CAC30575.1	ACC40239.1	SCY_orf02437_1	AMP25012.1	ABK70987.1	CDO87854.1	CCP45719.1	ABL04473.1	ABM11597.1
CAM63313.1	AAS05300.1	ADU00136.1	ABL91204.1	CAC30573.1	ACC40241.1	SCY_orf02441_1	AMP25014.1	ABK70550.1	CDO87856.1	CCP45718.1	ABL04475.1	ABM12996.1
CAM63305.1	AAS05294.1	ADU00129.1	ABL91210.1	CAC30569.1	ACC40248.1	SCY_orf02454_1	AMP25023.1	ABK69801.1	CDO87865.1	CCP45711.1	ABL04482.1	ABM13002.1
CAM63304.1	AAS05293.1	ADU00128.1	ABL91211.1	CAC30568.1	ACC40249.1	SCY_orf02455_1	AMP25024.1	ABK70570.1	CDO87866.1	CCP45710.1	ABL04483.1	ABM13003.1
CAM63303.1	AAS05292.1	ADU00127.1	ABL91212.1	CAC30567.1	ACC40250.1	SCY_orf02456_1	AMP25025.1	ABK71256.1	CDO87867.1	CCP45709.1	ABL04484.1	ABM13004.1
CAM63302.1	AAS05291.1	ADU00126.1	ABL91213.1	CAC30566.1	ACC40251.1	SCY_orf02458_1	AMP25026.1	ABK73206.1	CDO87868.1	CCP45708.1	ABL04485.1	ABM13005.1
CAM63300.1	AAS05289.1	ADU00124.1	ABL91215.1	CAC30564.1	ACC40253.1	SCY_orf02461_1	AMP25028.1	ABK69938.1	CDO87870.1	CCP45706.1	ABL04487.1	ABM13007.1
CAM63298.1	AAS05287.1	ADU00122.1	ABL91217.1	CAC30562.1	ACC40255.1	SCY_orf02463_1	AMP25030.1	ABK73838.1	CDO87872.1	CCP45704.1	ABL04489.1	ABM13009.1
CAM63297.1	AAS05286.1	ADU00121.1	ABL91218.1	CAC30561.1	ACC40256.1	SCY_orf02464_1	AMP25031.1	ABK73959.1	CDO87873.1	CCP45703.1	ABL04490.1	ABM13010.1
CAM63280.1	AAS05275.1	ADU00090.1	ABL91235.1	CAC30551.1	ACC40266.1	SCY_orf02483_1	AMP25067.1	ABK75383.1	CDO87888.1	CCP45696.1	ABL04497.1	ABM13021.1
CAM63273.1	AAS05273.1	ADU00088.1	ABL91238.1	CAC30549.1	ACC40268.1	SCY_orf02486_1	AMP25069.1	ABK72098.1	CDO87890.1	CCP45692.1	ABL04498.1	ABM13023.1
CAM63272.1	AAS05272.1	ADU00087.1	ABL91239.1	CAC30548.1	ACC40269.1	SCY_orf02488_1	AMP25070.1	ABK70376.1	CDO87891.1	CCP45691.1	ABL04499.1	ABM13024.1
CAM63265.1	AAS05263.1	ADU00079.1	ABL91248.1	CAC30542.1	ACC40275.1	SCY_orf02503_1	AMP25078.1	ABK70978.1	CDO87899.1	CCP45685.1	ABL04505.1	ABM13034.1
CAM63264.1	AAS05262.1	ADU00078.1	ABL91249.1	CAC30541.1	ACC40276.1	SCY_orf02504_1	AMP25079.1	ABK74812.1	CDO87900.1	CCP45684.1	ABL04506.1	ABM13035.1
CAM63248.1	AAS05257.1	ADU00038.1	ABL91286.1	CAC30534.1	ACC40285.1	SCY_orf02514_1	AMP25084.1	ABK73985.1	CDO87906.1	CCP45672.1	ABL04514.1	ABM13074.1
CAM63241.1	AAS05251.1	ADU00027.1	ABL91294.1	CAC30527.1	ACC40291.1	SCY_orf02525_1	AMP25090.1	ABK71276.1	CDO87912.1	CCP45662.1	ABL04520.1	ABM13086.1
CAM63212.1	AAS05226.1	ADT99997.1	ABL91324.1	CAC30509.1	ACC40341.1	SCY_orf02557_1	AMP25124.1	ABK73051.1	CDO87939.1	CCP45642.1	ABL04541.1	ABM13126.1
CAM63208.1	AAS05224.1	ADT99995.1	ABL91326.1	CAC30507.1	ACC40343.1	SCY_orf02560_1	AMP25125.1	ABK71301.1	CDO87940.1	CCP45640.1	ABL04543.1	ABM13128.1
CAM63207.1	AAS05223.1	ADT99994.1	ABL91327.1	CAC30506.1	ACC40344.1	SCY_orf02562_1	AMP25126.1	ABK74547.1	CDO87941.1	CCP45639.1	ABL04544.1	ABM13129.1
CAM63195.1	AAS05217.1	ADT99985.1	ABL91337.1	CAC30499.1	ACC40364.1	SCY_orf02572_1	AMP26415.1	ABK69750.1	CDO87955.1	CCP45594.1	ABL04556.1	ABM13141.1
CAM63193.1	AAS05215.1	ADT99983.1	ABL91339.1	CAC30497.1	ACC40366.1	SCY_orf02574_1	AMP25149.1	ABK74244.1	CDO87957.1	CCP45592.1	ABL04558.1	ABM13143.1
CAM63186.1	AAS05210.1	ADT99980.1	ABL91342.1	CAC31233.1	ACC40370.1	SCY_orf02581_1	AMP25153.1	ABK69774.1	CDO87961.1	CCP45585.1	ABL04562.1	ABM13162.1
CAM63185.1	AAS05209.1	ADT99979.1	ABL91343.1	CAC31234.1	ACC40371.1	SCY_orf02583_1	AMP25156.1	ABK73765.1	CDO87962.1	CCP45584.1	ABL04563.1	ABM13163.1
CAM63183.1	AAS05208.1	ADT99978.1	ABL91344.1	CAC31235.1	ACC40374.1	SCY_orf02584_1	AMP25157.1	ABK73464.1	CDO87963.1	CCP45582.1	ABL04566.1	ABM13164.1
CAM63177.1	AAS05205.1	ADT99972.1	ABL91348.1	CAC30483.1	ACC40377.1	SCY_orf02591_1	AMP25158.1	ABK70995.1	CDO87967.1	CCP45579.1	ABL04569.1	ABM13169.1
CAM63168.1	AAS05186.1	ADT99962.1	ABL91356.1	CAC30470.1	ACC40406.1	SCY_orf02623_1	AMP25197.1	ABK70129.1	CDO87993.1	CCP45563.1	ABL04586.1	ABM13194.1
CAM63163.1	AAS05182.1	ADT99957.1	ABL91359.1	CAC30465.1	ACC40411.1	SCY_orf02632_1	AMP25201.1	ABK75331.1	CDO88000.1	CCP45553.1	ABL04589.1	ABM13200.1
CAM63162.1	AAS05181.1	ADT99956.1	ABL91360.1	CAC30464.1	ACC40412.1	SCY_orf02634_1	AMP25202.1	ABK72186.1	CDO88001.1	CCP45552.1	ABL04590.1	ABM13201.1
CAM63152.1	AAS05176.1	ADT99950.1	ABL91365.1	CAC31358.1	ACC40417.1	SCY_orf02645_1	AMP26430.1	ABK76147.1	CDO88009.1	CCP45547.1	ABL05568.1	ABM13207.1
CAM63150.1	AAS05175.1	ADT99946.1	ABL91366.1	CAC31359.1	ACC40418.1	SCY_orf02647_1	AMP25206.1	ABK72081.1	CDO88010.1	CCP45546.1	ABL05567.1	ABM13208.1
CAM63140.1	AAS05168.1	ADT99940.1	ABL91373.1	CAC31366.1	ACC40424.1	SCY_orf02654_1	AMP25212.1	ABK70943.1	CDO88016.1	CCP45538.1	ABL05561.1	ABM13215.1
CAM63139.1	AAS05167.1	ADT99939.1	ABL91374.1	CAC31367.1	ACC40425.1	SCY_orf02655_1	AMP25213.1	ABK71520.1	CDO88017.1	CCP45537.1	ABL05560.1	ABM13216.1
CAM63138.1	AAS05165.1	ADT99931.1	ABL91391.1	CAC31368.1	ACC40427.1	SCY_orf02659_1	AMP25215.1	ABK74334.1	CDO88019.1	CCP45535.1	ABL05558.1	ABM13233.1
CAM63122.1	AAS05158.1	ADT99918.1	ABL91406.1	CAC31376.1	ACC40436.1	SCY_orf02673_1	AMP26431.1	ABK71690.1	CDO88026.1	CCP45525.1	ABL05550.1	ABM13247.1
CAM63120.1	AAS05156.1	ADT99916.1	ABL91408.1	CAC31378.1	ACC40438.1	SCY_orf02677_1	AMP25223.1	ABK75983.1	CDO88028.1	CCP45523.1	ABL05548.1	ABM13249.1
CAM63116.1	AAS05153.1	ADT99912.1	ABL91412.1	CAC31384.1	ACC40442.1	SCY_orf02681_1	AMP25226.1	ABK70187.1	CDO88031.1	CCP45518.1	ABL05545.1	ABM13254.1
CAM63114.1	AAS05151.1	ADT99910.1	ABL91414.1	CAC31386.1	ACC40444.1	SCY_orf02683_1	AMP25228.1	ABK70907.1	CDO88033.1	CCP45516.1	ABL05543.1	ABM13256.1
CAM63111.1	AAS05148.1	ADT99907.1	ABL91417.1	CAC31390.1	ACC40448.1	SCY_orf02690_1	AMP25232.1	ABK73799.1	CDO88037.1	CCP45512.1	ABL05539.1	ABM13259.1
CAM63106.1	AAS05143.1	ADT99904.1	ABL91421.1	CAC31395.1	ACC40453.1	SCY_orf02695_1	AMP25236.1	ABK74955.1	CDO88042.1	CCP45508.1	ABL05534.1	ABM13264.1
CAM63105.1	AAS05142.1	ADT99903.1	ABL91422.1	CAC31396.1	ACC40454.1	SCY_orf02697_1	AMP25237.1	ABK70495.1	CDO88043.1	CCP45507.1	ABL05533.1	ABM13265.1
CAM63104.1	AAS05141.1	ADT99902.1	ABL91423.1	CAC31397.1	ACC40455.1	SCY_orf02698_1	AMP25238.1	ABK72160.1	CDO88044.1	CCP45506.1	ABL05532.1	ABM13266.1
CAM63087.1	AAS05137.1	ADT99895.1	ABL91429.1	CAC31403.1	ACC40461.1	SCY_orf02703_1	AMP26436.1	ABK71305.1	CDO88049.1	CCP45501.1	ABL05527.1	ABM13274.1
CAM63086.1	AAS05136.1	ADT99894.1	ABL91430.1	CAC31404.1	ACC40462.1	SCY_orf02706_1	AMP25257.1	ABK73518.1	CDO88050.1	CCP45500.1	ABL05526.1	ABM13275.1
CAM63083.1	AAS05133.1	ADT99891.1	ABL91433.1	CAC31407.1	ACC40465.1	SCY_orf02710_1	AMP25260.1	ABK72219.1	CDO88053.1	CCP45497.1	ABL05523.1	ABM13278.1
CAM63081.1	AAS05131.1	ADT99889.1	ABL91435.1	CAC31409.1	ACC40467.1	SCY_orf02713_1	AMP25262.1	ABK69761.1	CDO88055.1	CCP45495.1	ABL05521.1	ABM13280.1
CAM63068.1	AAS05120.1	ADT99879.1	ABL91452.1	CAC31419.1	ACC40482.1	SCY_orf02729_1	AMP25270.1	ABK71660.1	CDO88065.1	CCP45480.1	ABL05509.1	ABM13290.1
CAM63065.1	AAS05118.1	ADT99876.1	ABL91455.1	CAC31422.1	ACC40485.1	SCY_orf02736_1	AMP25271.1	ABK75712.1	CDO88067.1	CCP45478.1	ABL05505.1	ABM13293.1
CAM63064.1	AAS05116.1	ADT99875.1	ABL91456.1	CAC31424.1	ACC40487.1	SCY_orf02738_1	AMP25273.1	ABK69905.1	CDO88069.1	CCP45476.1	ABL05503.1	ABM13294.1
CAM63062.1	AAS05114.1	ADT99873.1	ABL91458.1	CAC31426.1	ACC40489.1	SCY_orf02740_1	AMP25275.1	ABK71061.1	CDO88071.1	CCP45474.1	ABL05501.1	ABM13296.1
CAM62977.1	AAS05033.1	ADT99797.1	ABL91487.1	CAC29964.1	ACC40538.1	SCY_orf02827_1	AMP25315.1	ABK73551.1	CDO88149.1	CCP45411.1	ABL05463.1	ABM13368.1
CAM62976.1	AAS05032.1	ADT99796.1	ABL91488.1	CAC29963.1	ACC40539.1	SCY_orf02829_1	AMP25316.1	ABK75969.1	CDO88150.1	CCP45410.1	ABL05462.1	ABM13369.1
CAM62973.1	AAS05029.1	ADT99793.1	ABL91491.1	CAC29960.1	ACC40542.1	SCY_orf02833_1	AMP25319.1	ABK72422.1	CDO88153.1	CCP45407.1	ABL05459.1	ABM13372.1
CAM62971.1	AAS05027.1	ADT99791.1	ABL91493.1	CAC29958.1	ACC40544.1	SCY_orf02838_1	AMP25321.1	ABK71063.1	CDO88157.1	CCP45403.1	ABL05457.1	ABM13374.1
CAM62969.1	AAS05025.1	ADT99789.1	ABL91495.1	CAC29982.1	ACC40546.1	SCY_orf02841_1	AMP25323.1	ABK74770.1	CDO88159.1	CCP45401.1	ABL05455.1	ABM13376.1
CAM62967.1	AAS03347.1	ADT99787.1	ABL91496.1	CAC29983.1	ACC40548.1	SCY_orf02844_1	AMP25326.1	ABK69978.1	CDO88160.1	CCP45400.1	ABL05453.1	ABM13379.1
CAM62963.1	AAS03353.1	ADT99784.1	ABL91510.1	CAC29989.1	ACC40559.1	SCY_orf02851_1	AMP25330.1	ABK76031.1	CDO88165.1	CCP45390.1	ABL04200.1	ABM13382.1
CAM62962.1	AAS03354.1	ADT99783.1	ABL91511.1	CAC29990.1	ACC40560.1	SCY_orf02852_1	AMP25331.1	ABK69898.1	CDO88166.1	CCP45389.1	ABL04201.1	ABM13383.1
CAM62961.1	AAS03355.1	ADT99782.1	ABL91512.1	CAC29991.1	ACC40561.1	SCY_orf02853_1	AMP25332.1	ABK75910.1	CDO88167.1	CCP45388.1	ABL04202.1	ABM13384.1
CAM62960.1	AAS03359.1	ADT99775.1	ABL91520.1	CAC29994.1	ACC40569.1	SCY_orf02862_1	AMP25337.1	ABK73742.1	CDO88172.1	CCP45384.1	ABL04209.1	ABM13390.1
CAM62955.1	AAS03364.1	ADT99770.1	ABL91525.1	CAC29999.1	ACC40574.1	SCY_orf02872_1	AMP26451.1	ABK73954.1	CDO88177.1	CCP45379.1	ABL04214.1	ABM13395.1
CAM62951.1	AAS03369.1	ADT99767.1	ABL91530.1	CAC30002.1	ACC40577.1	SCY_orf02883_1	AMP25343.1	ABK75361.1	CDO88181.1	CCP45376.1	ABL04217.1	ABM13398.1
CAM62944.1	AAS03380.1	ADT99743.1	ABL91553.1	CAC30009.1	ACC40607.1	SCY_orf02900_1	AMP25350.1	ABK74097.1	CDO88195.1	CCP45368.1	ABL04225.1	ABM13423.1
CAM62932.1	AAS03389.1	ADT99724.1	ABL91570.1	CAC30018.1	ACC40616.1	SCY_orf02925_1	AMP26455.1	ABK75706.1	CDO88205.1	CCP45355.1	ABL04232.1	ABM13443.1
CAM62930.1	AAS03394.1	ADT99721.1	ABL91591.1	CAC30020.1	ACC40619.1	SCY_orf02930_1	AMP25361.1	ABK71787.1	CDO88208.1	CCP45351.1	ABL04235.1	ABM13448.1
CAM62922.1	AAS03408.1	ADT99716.1	ABL91597.1	CAC30024.1	ACC40624.1	SCY_orf02939_1	AMP26457.1	ABK72490.1	CDO88213.1	CCP45335.1	ABL04239.1	ABM13453.1
CAM62921.1	AAS03409.1	ADT99715.1	ABL91598.1	CAC30025.1	ACC40625.1	SCY_orf02940_1	AMP25365.1	ABK73244.1	CDO88214.1	CCP45334.1	ABL04240.1	ABM13454.1
CAM62920.1	AAS03410.1	ADT99714.1	ABL91599.1	CAC30026.1	ACC40626.1	SCY_orf02941_1	AMP25366.1	ABK72086.1	CDO88215.1	CCP45333.1	ABL04241.1	ABM13455.1
CAM62916.1	AAS03414.1	ADT99710.1	ABL91603.1	CAC30030.1	ACC40630.1	SCY_orf02949_1	AMP25369.1	ABK75349.1	CDO88220.1	CCP45329.1	ABL04245.1	ABM13459.1
CAM62915.1	AAS03415.1	ADT99709.1	ABL91604.1	CAC30031.1	ACC40631.1	SCY_orf02950_1	AMP25370.1	ABK72859.1	CDO88221.1	CCP45328.1	ABL04246.1	ABM13460.1
CAM62910.1	AAS03432.1	ADT99705.1	ABL91608.1	CAC30040.1	ACC40644.1	SCY_orf03024_1	AMP25387.1	ABK74784.1	CDO88249.1	CCP44139.1	ABL04257.1	ABM13467.1
CAM62909.1	AAS03433.1	ADT99704.1	ABL91609.1	CAC30041.1	ACC40645.1	SCY_orf03026_1	AMP25388.1	ABK75784.1	CDO88250.1	CCP44140.1	ABL04258.1	ABM13468.1
CAM62907.1	AAS03435.1	ADT99702.1	ABL91611.1	CAC30043.1	ACC40647.1	SCY_orf03030_1	AMP26465.1	ABK75681.1	CDO88252.1	CCP44142.1	ABL04260.1	ABM13470.1
CAM62906.1	AAS03436.1	ADT99701.1	ABL91612.1	CAC30044.1	ACC40648.1	SCY_orf03032_1	AMP25390.1	ABK71711.1	CDO88253.1	CCP44143.1	ABL04261.1	ABM13471.1
CAM62905.1	AAS03437.1	ADT99700.1	ABL91613.1	CAC30045.1	ACC40649.1	SCY_orf03034_1	AMP25391.1	ABK73017.1	CDO88254.1	CCP44144.1	ABL04262.1	ABM13472.1
CAM62903.1	AAS03439.1	ADT99699.1	ABL91614.1	CAC30048.1	ACC40650.1	SCY_orf03035_1	AMP25392.1	ABK76141.1	CDO88255.1	CCP44147.1	ABL04263.1	ABM13473.1
CAM62902.1	AAS03440.1	ADT99698.1	ABL91615.1	CAC30049.1	ACC40651.1	SCY_orf03036_1	AMP25393.1	ABK70923.1	CDO88256.1	CCP44148.1	ABL04264.1	ABM13474.1
CAM62901.1	AAS03441.1	ADT99697.1	ABL91616.1	CAC30050.1	ACC40652.1	SCY_orf03037_1	AMP25394.1	ABK69545.1	CDO88257.1	CCP44149.1	ABL04265.1	ABM13475.1
CAM62900.1	AAS03442.1	ADT99696.1	ABL91617.1	CAC30051.1	ACC40653.1	SCY_orf03038_1	AMP25395.1	ABK75458.1	CDO88258.1	CCP44150.1	ABL04266.1	ABM13476.1
CAM62899.1	AAS03443.1	ADT99695.1	ABL91618.1	CAC30052.1	ACC40654.1	SCY_orf03039_1	AMP25396.1	ABK70190.1	CDO88259.1	CCP44151.1	ABL04267.1	ABM13477.1
CAM62890.1	AAS03450.1	ADT99688.1	ABL91628.1	CAC30060.1	ACC40664.1	SCY_orf03054_1	AMP25414.1	ABK70808.1	CDO88269.1	CCP44165.1	ABL04278.1	ABM13494.1
CAM62888.1	AAS03452.1	ADT99686.1	ABL91630.1	CAC30062.1	ACC40666.1	SCY_orf03056_1	AMP25416.1	ABK70845.1	CDO88271.1	CCP44167.1	ABL04280.1	ABM13496.1
CAM62887.1	AAS03453.1	ADT99685.1	ABL91631.1	CAC30063.1	ACC40667.1	SCY_orf03057_1	AMP25417.1	ABK75722.1	CDO88272.1	CCP44168.1	ABL04281.1	ABM13497.1
CAM62876.1	AAS03456.1	ADT99680.1	ABL91634.1	CAC30066.1	ACC40670.1	SCY_orf03062_1	AMP25420.1	ABK69562.1	CDO88275.1	CCP44171.1	ABL04284.1	ABM13500.1
CAM62875.1	AAS03457.1	ADT99678.1	ABL91635.1	CAC30067.1	ACC40671.1	SCY_orf03068_1	AMP25423.1	ABK73119.1	CDO88278.1	CCP44174.1	ABL04285.1	ABM13501.1
CAM62874.1	AAS03458.1	ADT99677.1	ABL91636.1	CAC30068.1	ACC40672.1	SCY_orf03069_1	AMP25424.1	ABK72598.1	CDO88279.1	CCP44175.1	ABL04286.1	ABM13502.1
CAM62862.1	AAS03464.1	ADT99673.1	ABL91641.1	CAC30071.1	ACC40677.1	SCY_orf03076_1	AMP25428.1	ABK72905.1	CDO88284.1	CCP44180.1	ABL04291.1	ABM13505.1
CAM62861.1	AAS03465.1	ADT99672.1	ABL91642.1	CAC30072.1	ACC40678.1	SCY_orf03079_1	AMP25429.1	ABK72851.1	CDO88285.1	CCP44181.1	ABL04292.1	ABM13506.1
CAM62860.1	AAS03466.1	ADT99671.1	ABL91643.1	CAC30073.1	ACC40679.1	SCY_orf03080_1	AMP26467.1	ABK71877.1	CDO88286.1	CCP44182.1	ABL04293.1	ABM13507.1
CAM62857.1	AAS03482.1	ADT99668.1	ABL91648.1	CAC30079.1	ACC40689.1	SCY_orf03098_1	AMP25432.1	ABK71882.1	CDO88294.1	CCP44196.1	ABL04302.1	ABM13511.1
CAM62856.1	AAS03483.1	ADT99667.1	ABL91649.1	CAC30080.1	ACC40690.1	SCY_orf03099_1	AMP25433.1	ABK73882.1	CDO88295.1	CCP44197.1	ABL04303.1	ABM13512.1
CAM62853.1	AAS03484.1	ADT99666.1	ABL91650.1	CAC30085.1	ACC40695.1	SCY_orf03100_1	AMP25434.1	ABK75717.1	CDO88296.1	CCP44199.1	ABL04306.1	ABM13513.1
CAM62841.1	AAS03492.1	ADT99655.1	ABL91654.1	CAC30088.1	ACC40700.1	SCY_orf03112_1	AMP25439.1	ABK70490.1	CDO88301.1	CCP44205.1	ABL04312.1	ABM13524.1
CAM62838.1	AAS03495.1	ADT99652.1	ABL91657.1	CAC30091.1	ACC40703.1	SCY_orf03117_1	AMP25442.1	ABK75285.1	CDO88304.1	CCP44208.1	ABL04315.1	ABM13527.1
CAM62837.1	AAS03496.1	ADT99651.1	ABL91658.1	CAC30092.1	ACC40704.1	SCY_orf03118_1	AMP25443.1	ABK73711.1	CDO88305.1	CCP44210.1	ABL04316.1	ABM13528.1
CAM62833.1	AAS03499.1	ADT99647.1	ABL91671.1	CAC30095.1	ACC40710.1	SCY_orf03121_1	AMP25445.1	ABK72041.1	CDO88310.1	CCP44215.1	ABL04323.1	ABM13533.1
CAM62831.1	AAS03501.1	ADT99643.1	ABL91675.1	CAC30098.1	ACC40712.1	SCY_orf03126_1	AMP26470.1	ABK75719.1	CDO88312.1	CCP44217.1	ABL04325.1	ABM13537.1
CAM62832.1	AAS03500.1	ADT99644.1	ABL91674.1	CAC30097.1	ACC40711.1	SCY_orf03128_1	AMP25446.1	ABK70509.1	CDO88311.1	CCP44216.1	ABL04324.1	ABM13536.1
CAM62830.1	AAS03502.1	ADT99642.1	ABL91676.1	CAC30099.1	ACC40713.1	SCY_orf03129_1	AMP25447.1	ABK73947.1	CDO88313.1	CCP44218.1	ABL04326.1	ABM13538.1
CAM62829.1	AAS03503.1	ADT99641.1	ABL91677.1	CAC30100.1	ACC40714.1	SCY_orf03130_1	AMP25448.1	ABK72979.1	CDO88314.1	CCP44219.1	ABL04327.1	ABM13539.1
CAM62828.1	AAS03504.1	ADT99640.1	ABL91678.1	CAC30101.1	ACC40715.1	SCY_orf03131_1	AMP25449.1	ABK74687.1	CDO88315.1	CCP44220.1	ABL04328.1	ABM13540.1
CAM62827.1	AAS03505.1	ADT99639.1	ABL91679.1	CAC30102.1	ACC40716.1	SCY_orf03133_1	AMP25450.1	ABK70157.1	CDO88316.1	CCP44221.1	ABL04329.1	ABM13541.1
CAM62826.1	AAS03506.1	ADT99638.1	ABL91680.1	CAC30103.1	ACC40717.1	SCY_orf03135_1	AMP25451.1	ABK71715.1	CDO88317.1	CCP44222.1	ABL04330.1	ABM13542.1
CAM62825.1	AAS03507.1	ADT99637.1	ABL91681.1	CAC30104.1	ACC40718.1	SCY_orf03136_1	AMP25452.1	ABK74166.1	CDO88318.1	CCP44223.1	ABL04331.1	ABM13543.1
CAM62824.1	AAS03508.1	ADT99636.1	ABL91682.1	CAC30105.1	ACC40719.1	SCY_orf03137_1	AMP25453.1	ABK73018.1	CDO88319.1	CCP44224.1	ABL04332.1	ABM13544.1
CAM62823.1	AAS03509.1	ADT99635.1	ABL91683.1	CAC30106.1	ACC40720.1	SCY_orf03138_1	AMP25454.1	ABK72929.1	CDO88320.1	CCP44225.1	ABL04333.1	ABM13545.1
CAM62815.1	AAS03515.1	ADT99632.1	ABL91688.1	CAC30769.1	ACC40728.1	SCY_orf03146_1	AMP25459.1	ABK71010.1	CDO88325.1	CCP44232.1	ABL04003.1	ABM13549.1
CAM62809.1	AAS03518.1	ADT99629.1	ABL91691.1	CAC30767.1	ACC40731.1	SCY_orf03151_1	AMP26471.1	ABK73859.1	CDO88328.1	CCP44235.1	ABL04006.1	ABM13552.1
CAM62805.1	AAS03522.1	ADT99625.1	ABL91695.1	CAC30763.1	ACC40735.1	SCY_orf03158_1	AMP25465.1	ABK72180.1	CDO88332.1	CCP44239.1	ABL04010.1	ABM13556.1
CAM62804.1	AAS03523.1	ADT99624.1	ABL91696.1	CAC30762.1	ACC40736.1	SCY_orf03159_1	AMP25466.1	ABK72529.1	CDO88333.1	CCP44240.1	ABL04011.1	ABM13557.1
CAM62803.1	AAS03524.1	ADT99623.1	ABL91697.1	CAC30761.1	ACC40737.1	SCY_orf03161_1	AMP25467.1	ABK70345.1	CDO88334.1	CCP44241.1	ABL04012.1	ABM13558.1
CAM62802.1	AAS03526.1	ADT99622.1	ABL91698.1	CAC30760.1	ACC40738.1	SCY_orf03165_1	AMP25470.1	ABK71816.1	CDO88336.1	CCP44243.1	ABL04013.1	ABM13559.1
CAM62801.1	AAS03527.1	ADT99621.1	ABL91699.1	CAC30759.1	ACC40739.1	SCY_orf03166_1	AMP25471.1	ABK73247.1	CDO88337.1	CCP44244.1	ABL04014.1	ABM13560.1
CAM62790.1	AAS03543.1	ADT99612.1	ABL92377.1	CAC30752.1	ACC40752.1	SCY_orf03177_1	AMP25479.1	ABK74995.1	CDO88347.1	CCP44254.1	ABL04027.1	ABM13570.1
CAM62789.1	AAS03544.1	ADT99611.1	ABL92376.1	CAC30751.1	ACC40753.1	SCY_orf03180_1	AMP25480.1	ABK73773.1	CDO88348.1	CCP44257.1	ABL04028.1	ABM13571.1
CAM62784.1	AAS03563.1	ADT99606.1	ABL92354.1	CAC31576.1	ACC40805.1	SCY_orf03241_1	AMP26479.1	ABK75178.1	CDO88389.1	CCP44300.1	ABL04045.1	ABM13576.1
CAM62780.1	AAS03567.1	ADT99602.1	ABL92347.1	CAC31580.1	ACC40810.1	SCY_orf03246_1	AMP26480.1	ABK75519.1	CDO88398.1	CCP44303.1	ABL04049.1	ABM13580.1
CAM62779.1	AAS03568.1	ADT99601.1	ABL92346.1	CAC31581.1	ACC40811.1	SCY_orf03247_1	AMP25511.1	ABK73618.1	CDO88399.1	CCP44304.1	ABL04050.1	ABM13581.1
CAM62776.1	AAS03574.1	ADT99598.1	ABL92341.1	CAC31588.1	ACC40818.1	SCY_orf03262_1	AMP26482.1	ABK72022.1	CDO88402.1	CCP44311.1	ABL04056.1	ABM13584.1
CAM62771.1	AAS03581.1	ADT99596.1	ABL92337.1	CAC31590.1	ACC40823.1	SCY_orf03271_1	AMP25519.1	ABK70104.1	CDO88408.1	CCP44323.1	ABL04061.1	ABM13590.1
CAM62768.1	AAS03591.1	ADT99591.1	ABL92332.1	CAC31597.1	ACC40832.1	SCY_orf03288_1	AMP25528.1	ABK74192.1	CDO88419.1	CCP44332.1	ABL04070.1	ABM13595.1
CAM62767.1	AAS03592.1	ADT99590.1	ABL92331.1	CAC31598.1	ACC40833.1	SCY_orf03290_1	AMP25529.1	ABK73253.1	CDO88420.1	CCP44333.1	ABL04071.1	ABM13596.1
CAM62764.1	AAS03600.1	ADT99586.1	ABL92327.1	CAC31601.1	ACC40836.1	SCY_orf03303_1	AMP26488.1	ABK73579.1	CDO88427.1	CCP44353.1	ABL04074.1	ABM13600.1
CAM62763.1	AAS03601.1	ADT99585.1	ABL92326.1	CAC31602.1	ACC40837.1	SCY_orf03304_1	AMP25536.1	ABK73019.1	CDO88428.1	CCP44354.1	ABL04075.1	ABM13601.1
CAM62755.1	AAS03605.1	ADT99582.1	ABL92323.1	CAC31605.1	ACC40840.1	SCY_orf03309_1	AMP25538.1	ABK73712.1	CDO88431.1	CCP44357.1	ABL04078.1	ABM13604.1
CAM62754.1	AAS03606.1	ADT99581.1	ABL92322.1	CAC31606.1	ACC40841.1	SCY_orf03310_1	AMP25539.1	ABK69796.1	CDO88432.1	CCP44358.1	ABL04079.1	ABM13605.1
CAM62752.1	AAS03608.1	ADT99579.1	ABL92320.1	CAC31608.1	ACC40843.1	SCY_orf03313_1	AMP25541.1	ABK71340.1	CDO88434.1	CCP44360.1	ABL04081.1	ABM13607.1
CAM62750.1	AAS03610.1	ADT99575.1	ABL92316.1	CAC31638.1	ACC40845.1	SCY_orf03318_1	AMP25543.1	ABK73994.1	CDO88437.1	CCP44363.1	ABL04083.1	ABM13611.1
CAM62749.1	AAS03611.1	ADT99574.1	ABL92315.1	CAC31639.1	ACC40846.1	SCY_orf03319_1	AMP25544.1	ABK73040.1	CDO88438.1	CCP44364.1	ABL04084.1	ABM13612.1
CAM62748.1	AAS03612.1	ADT99573.1	ABL92314.1	CAC31640.1	ACC40847.1	SCY_orf03320_1	AMP25545.1	ABK75479.1	CDO88439.1	CCP44365.1	ABL04085.1	ABM13613.1
CAM62747.1	AAS03613.1	ADT99572.1	ABL92313.1	CAC31641.1	ACC40848.1	SCY_orf03321_1	AMP25546.1	ABK71508.1	CDO88440.1	CCP44366.1	ABL04086.1	ABM13614.1
CAM62746.1	AAS03614.1	ADT99571.1	ABL92312.1	CAC31642.1	ACC40849.1	SCY_orf03323_1	AMP25547.1	ABK72214.1	CDO88441.1	CCP44367.1	ABL04087.1	ABM13615.1
CAM62744.1	AAS03616.1	ADT99569.1	ABL92310.1	CAC31644.1	ACC40851.1	SCY_orf03327_1	AMP25549.1	ABK70435.1	CDO88443.1	CCP44369.1	ABL04089.1	ABM13617.1
CAM62743.1	AAS03617.1	ADT99568.1	ABL92309.1	CAC31645.1	ACC40852.1	SCY_orf03328_1	AMP25550.1	ABK75081.1	CDO88444.1	CCP44370.1	ABL04090.1	ABM13618.1
CAM62725.1	AAS03622.1	ADT99563.1	ABL92304.1	CAC31652.1	ACC40863.1	SCY_orf03337_1	AMP25552.1	ABK74351.1	CDO88449.1	CCP44375.1	ABL04097.1	ABM13623.1
CAM62724.1	AAS03623.1	ADT99562.1	ABL92303.1	CAC31653.1	ACC40864.1	SCY_orf03338_1	AMP25553.1	ABK76057.1	CDO88450.1	CCP44376.1	ABL04098.1	ABM13624.1
CAM62723.1	AAS03624.1	ADT99561.1	ABL92302.1	CAC31654.1	ACC40865.1	SCY_orf03339_1	AMP25554.1	ABK71171.1	CDO88451.1	CCP44377.1	ABL04099.1	ABM13625.1
CAM62719.1	AAS03627.1	ADT99554.1	ABL92295.1	CAC31658.1	ACC40870.1	SCY_orf03344_1	AMP25556.1	ABK73039.1	CDO88455.1	CCP44381.1	ABL04103.1	ABM13631.1
CAM62707.1	AAS03636.1	ADT99538.1	ABL92261.1	CAC31667.1	ACC40879.1	SCY_orf03355_1	AMP25565.1	ABK71999.1	CDO88465.1	CCP44390.1	ABL04110.1	ABM13647.1
CAM62696.1	AAS03639.1	ADT99527.1	ABL92251.1	CAC31762.1	ACC40882.1	SCY_orf03361_1	AMP25568.1	ABK71724.1	CDO88468.1	CCP44393.1	ABL04112.1	ABM14158.1
CAM62377.1	AAS03642.1	ADT99525.1	ABL92245.1	CAC31763.1	ACC40883.1	SCY_orf03364_1	AMP25570.1	ABK74996.1	CDO88469.1	CCP44394.1	ABL04113.1	ABM14153.1
CAM62389.1	AAS03652.1	ADT99520.1	ABL92241.1	CAC31768.1	ACC40887.1	SCY_orf03377_1	AMP25578.1	ABK74777.1	CDO88477.1	CCP44397.1	ABL04117.1	ABM14147.1
CAM62393.1	AAS03656.1	ADT99515.1	ABL92230.1	CAC31771.1	ACC40890.1	SCY_orf03380_1	AMP25580.1	ABK75086.1	CDO88481.1	CCP44400.1	ABL04120.1	ABM14139.1
CAM62396.1	AAS03658.1	ADT99512.1	ABL92226.1	CAC31773.1	ACC40893.1	SCY_orf03384_1	AMP25582.1	ABK73411.1	CDO88484.1	CCP44402.1	ABL04123.1	ABM14136.1
CAM62402.1	AAS03669.1	ADT99506.1	ABL92219.1	CAC31775.1	ACC40898.1	SCY_orf03393_1	AMP25588.1	ABK71354.1	CDO88496.1	CCP44406.1	ABL04127.1	ABM14125.1
CAM62403.1	AAS03670.1	ADT99505.1	ABL92218.1	CAC31776.1	ACC40899.1	SCY_orf03394_1	AMP25589.1	ABK75420.1	CDO88497.1	CCP44407.1	ABL04128.1	ABM14124.1
CAM62404.1	AAS03671.1	ADT99504.1	ABL92217.1	CAC31777.1	ACC40900.1	SCY_orf03396_1	AMP25590.1	ABK72978.1	CDO88498.1	CCP44408.1	ABL04129.1	ABM14123.1
CAM62415.1	AAS03676.1	ADT99497.1	ABL92212.1	CAC30352.1	ACC40906.1	SCY_orf03406_1	AMP25594.1	ABK74870.1	CDO88503.1	CCP44414.1	ABL04135.1	ABM14115.1
CAM62417.1	AAS03678.1	ADT99494.1	ABL92210.1	CAC30357.1	ACC40912.1	SCY_orf03411_1	AMP25596.1	ABK73560.1	CDO88506.1	CCP44417.1	ABL04142.1	ABM14112.1
CAM62418.1	AAS03679.1	ADT99493.1	ABL92209.1	CAC30358.1	ACC40913.1	SCY_orf03412_1	AMP26502.1	ABK70668.1	CDO88507.1	CCP44418.1	ABL04143.1	ABM14111.1
CAM62419.1	AAS03680.1	ADT99492.1	ABL92208.1	CAC30359.1	ACC40914.1	SCY_orf03414_1	AMP25597.1	ABK73548.1	CDO88508.1	CCP44419.1	ABL04144.1	ABM14110.1
CAM62420.1	AAS03681.1	ADT99491.1	ABL92207.1	CAC30360.1	ACC40915.1	SCY_orf03417_1	AMP26503.1	ABK75110.1	CDO88509.1	CCP44420.1	ABL04145.1	ABM14109.1
CAM62421.1	AAS03682.1	ADT99490.1	ABL92206.1	CAC30361.1	ACC40916.1	SCY_orf03418_1	AMP25598.1	ABK75220.1	CDO88510.1	CCP44421.1	ABL04146.1	ABM14108.1
CAM62422.1	AAS03683.1	ADT99489.1	ABL92205.1	CAC30362.1	ACC40917.1	SCY_orf03421_1	AMP25599.1	ABK69544.1	CDO88511.1	CCP44422.1	ABL04147.1	ABM14107.1
CAM62423.1	AAS03684.1	ADT99488.1	ABL92204.1	CAC30363.1	ACC40918.1	SCY_orf03424_1	AMP25600.1	ABK71007.1	CDO88512.1	CCP44423.1	ABL04148.1	ABM14106.1
CAM62424.1	AAS03685.1	ADT99487.1	ABL92203.1	CAC30364.1	ACC40919.1	SCY_orf03426_1	AMP25601.1	ABK73307.1	CDO88513.1	CCP44424.1	ABL04149.1	ABM14105.1
CAM62435.1	AAS03713.1	ADT99478.1	ABL92193.1	CAC31733.1	ACC40938.1	SCY_orf03468_1	AMP21492.1	ABK71492.1	CDO88528.1	CCP44454.1	ABL04161.1	ABM14092.1
CAM62440.1	AAS03718.1	ADT99474.1	ABL92189.1	CAC31739.1	ACC40950.1	SCY_orf03477_1	AMP21496.1	ABK71205.1	CDO88533.1	CCP44459.1	ABL04172.1	ABM14088.1
CAM62441.1	AAS03719.1	ADT99473.1	ABL92188.1	CAC31740.1	ACC40951.1	SCY_orf03480_1	AMP21497.1	ABK73639.1	CDO88534.1	CCP44460.1	ABL04173.1	ABM14087.1
CAM62443.1	AAS03721.1	ADT99469.1	ABL92184.1	CAC31742.1	ACC40953.1	SCY_orf03483_1	AMP21499.1	ABK70659.1	CDO88536.1	CCP44462.1	ABL04175.1	ABM14083.1
CAM62445.1	AAS03723.1	ADT99467.1	ABL92182.1	CAC31744.1	ACC40955.1	SCY_orf03486_1	AMP21501.1	ABK76177.1	CDO88538.1	CCP44464.1	ABL04177.1	ABM14081.1
CAM62447.1	AAS03725.1	ADT99465.1	ABL92180.1	CAC31746.1	ACC40957.1	SCY_orf03488_1	AMP21503.1	ABK69588.1	CDO88540.1	CCP44466.1	ABL04179.1	ABM14079.1
CAM62448.1	AAS03727.1	ADT99463.1	ABL92170.1	CAC31748.1	ACC40974.1	SCY_orf03491_1	AMP21504.1	ABK72285.1	CDO88542.1	CCP44474.1	ABL05446.1	ABM14077.1
CAM62449.1	AAS03728.1	ADT99462.1	ABL92169.1	CAC31749.1	ACC40975.1	SCY_orf03492_1	AMP21505.1	ABK69593.1	CDO88543.1	CCP44475.1	ABL05445.1	ABM14076.1
CAM62450.1	AAS03729.1	ADT99461.1	ABL92168.1	CAC31750.1	ACC40976.1	SCY_orf03493_1	AMP25744.1	ABK73607.1	CDO88544.1	CCP44476.1	ABL05444.1	ABM14075.1
CAM62451.1	AAS03730.1	ADT99460.1	ABL92167.1	CAC31751.1	ACC40977.1	SCY_orf03495_1	AMP21506.1	ABK73036.1	CDO88545.1	CCP44477.1	ABL05443.1	ABM14074.1
CAM62452.1	AAS03731.1	ADT99459.1	ABL92166.1	CAC31752.1	ACC40978.1	SCY_orf03496_1	AMP21507.1	ABK70875.1	CDO88546.1	CCP44478.1	ABL05442.1	ABM14073.1
CAM62453.1	AAS03732.1	ADT99458.1	ABL92165.1	CAC31753.1	ACC40979.1	SCY_orf03497_1	AMP21508.1	ABK70233.1	CDO88547.1	CCP44479.1	ABL05441.1	ABM14072.1
CAM62478.1	AAS03851.1	ADT99370.1	ABL92088.1	CAC31037.1	ACC41141.1	SCY_orf03796_1	AMP21648.1	ABK70947.1	CDO88770.1	CCP44587.1	ABL05290.1	ABM13964.1
CAM62484.1	AAS03857.1	ADT99364.1	ABL92082.1	CAC31031.1	ACC41147.1	SCY_orf03804_1	AMP21653.1	ABK73997.1	CDO88776.1	CCP44593.1	ABL05296.1	ABM13937.1
CAM62485.1	AAS03858.1	ADT99363.1	ABL92081.1	CAC31030.1	ACC41148.1	SCY_orf03805_1	AMP21654.1	ABK73188.1	CDO88777.1	CCP44594.1	ABL05297.1	ABM13936.1
CAM62486.1	AAS03859.1	ADT99362.1	ABL92080.1	CAC31029.1	ACC41149.1	SCY_orf03806_1	AMP21655.1	ABK70991.1	CDO88778.1	CCP44595.1	ABL05298.1	ABM13935.1
CAM62487.1	AAS03860.1	ADT99361.1	ABL92079.1	CAC31028.1	ACC41150.1	SCY_orf03807_1	AMP21656.1	ABK74795.1	CDO88779.1	CCP44596.1	ABL05299.1	ABM13934.1
CAM62488.1	AAS03862.1	ADT99360.1	ABL92078.1	CAC31027.1	ACC41151.1	SCY_orf03808_1	AMP21657.1	ABK72470.1	CDO88780.1	CCP44598.1	ABL05300.1	ABM13933.1
CAM62490.1	AAS03866.1	ADT99329.1	ABL92055.1	CAC31024.1	ACC41156.1	SCY_orf03826_1	AMP21659.1	ABK71908.1	CDO88789.1	CCP44603.1	ABL05304.1	ABM13899.1
CAM62493.1	AAS03873.1	ADT99322.1	ABL92051.1	CAC31021.1	ACC41159.1	SCY_orf03831_1	AMP21662.1	ABK74721.1	CDO88792.1	CCP44609.1	ABL05288.1	ABM13892.1
CAM62494.1	AAS03874.1	ADT99321.1	ABL92050.1	CAC31020.1	ACC41160.1	SCY_orf03832_1	AMP21663.1	ABK74443.1	CDO88793.1	CCP44610.1	ABL05287.1	ABM13891.1
CAM62495.1	AAS03875.1	ADT99320.1	ABL92049.1	CAC31019.1	ACC41161.1	SCY_orf03833_1	AMP21664.1	ABK72473.1	CDO88794.1	CCP44611.1	ABL05286.1	ABM13890.1
CAM62496.1	AAS03876.1	ADT99319.1	ABL92048.1	CAC31018.1	ACC41162.1	SCY_orf03834_1	AMP21665.1	ABK71078.1	CDO88795.1	CCP44612.1	ABL05285.1	ABM13889.1
CAM62510.1	AAS03878.1	ADT99310.1	ABL92039.1	CAC31016.1	ACC41170.1	SCY_orf03849_1	AMP21678.1	ABK71587.1	CDO88803.1	CCP44620.1	ABL05277.1	ABM13880.1
CAM62289.1	AAS04115.1	ADT99078.1	ABL91746.1	CAC30389.1	ACC41464.1	SCY_orf04316_1	AMP21929.1	ABK74095.1	CDO89150.1	CCP44823.1	ABL04648.1	ABM14213.1
CAM62288.1	AAS04116.1	ADT99077.1	ABL91745.1	CAC30390.1	ACC41465.1	SCY_orf04317_1	AMP21930.1	ABK72511.1	CDO89151.1	CCP44824.1	ABL04649.1	ABM14214.1
CAM62270.1	AAS04145.1	ADT99053.1	ABL91718.1	CAC31714.1	ACC41513.1	SCY_orf04363_1	AMP25849.1	ABK73134.1	CDO89190.1	CCP44867.1	ABL04695.1	ABM14235.1
CAM62269.1	AAS04146.1	ADT99052.1	ABL91717.1	CAC31713.1	ACC41514.1	SCY_orf04365_1	AMP25850.1	ABK73367.1	CDO89191.1	CCP44868.1	ABL04696.1	ABM14236.1
CAM62264.1	AAS04150.1	ADT99047.1	ABL91709.1	CAC31709.1	ACC41518.1	SCY_orf04371_1	AMP21959.1	ABK72318.1	CDO89195.1	CCP44872.1	ABL04700.1	ABM14240.1
CAM62254.1	AAS04151.1	ADT99035.1	ABL92384.1	CAC31704.1	ACC41519.1	SCY_orf04373_1	AMP21960.1	ABK70795.1	CDO89196.1	CCP44884.1	ABL04701.1	ABM14243.1
CAM62253.1	AAS04152.1	ADT99034.1	ABL92385.1	CAC31703.1	ACC41520.1	SCY_orf04376_1	AMP21961.1	ABK70234.1	CDO89197.1	CCP44885.1	ABL04702.1	ABM14244.1
CAM62252.1	AAS04153.1	ADT99033.1	ABL92386.1	CAC31702.1	ACC41521.1	SCY_orf04378_1	AMP21962.1	ABK74855.1	CDO89198.1	CCP44886.1	ABL04703.1	ABM14245.1
CAM62251.1	AAS04154.1	ADT99032.1	ABL92387.1	CAC31701.1	ACC41522.1	SCY_orf04379_1	AMP21963.1	ABK71414.1	CDO89199.1	CCP44887.1	ABL04704.1	ABM14246.1
CAM62240.1	AAS04159.1	ADT99022.1	ABL92392.1	CAC31694.1	ACC41529.1	SCY_orf04389_1	AMP25853.1	ABK76023.1	CDO89205.1	CCP44893.1	ABL04711.1	ABM14257.1
CAM62236.1	AAS04160.1	ADT99021.1	ABL92393.1	CAC31693.1	ACC41530.1	SCY_orf04390_1	AMP21966.1	ABK71214.1	CDO89206.1	CCP44894.1	ABL04712.1	ABM14258.1
CAM62213.1	AAS04163.1	ADT99015.1	ABL92401.1	CAC31691.1	ACC41538.1	SCY_orf04395_1	AMP21969.1	ABK70846.1	CDO89209.1	CCP44896.1	ABL04718.1	ABM14265.1
CAM62212.1	AAS04164.1	ADT99014.1	ABL92402.1	CAC31690.1	ACC41539.1	SCY_orf04396_1	AMP21970.1	ABK75392.1	CDO89210.1	CCP44897.1	ABL04719.1	ABM14266.1
CAM62209.1	AAS04177.1	ADT99010.1	ABL92406.1	CAC31687.1	ACC41542.1	SCY_orf04417_1	AMP25855.1	ABK70362.1	CDO89224.1	CCP44900.1	ABL04721.1	ABM14270.1
CAM62197.1	AAS04193.1	ADT99007.1	ABL92409.1	CAC31683.1	ACC41545.1	SCY_orf04427_1	AMP21987.1	ABK74756.1	CDO89226.1	CCP44905.1	ABL04724.1	ABM14273.1
CAM62191.1	AAS04196.1	ADT99004.1	ABL92412.1	CAC31680.1	ACC41549.1	SCY_orf04430_1	AMP21989.1	ABK74288.1	CDO89229.1	CCP44909.1	ABL04728.1	ABM14276.1
CAM62190.1	AAS04197.1	ADT99003.1	ABL92413.1	CAC31679.1	ACC41550.1	SCY_orf04431_1	AMP21990.1	ABK75639.1	CDO89230.1	CCP44910.1	ABL04729.1	ABM14277.1
CAM62185.1	AAS04200.1	ADT98998.1	ABL92418.1	CAC31674.1	ACC41555.1	SCY_orf04435_1	AMP21995.1	ABK69985.1	CDO89235.1	CCP44914.1	ABL04734.1	ABM14282.1
CAM62184.1	AAS04202.1	ADT98997.1	ABL92419.1	CAC31670.1	ACC41557.1	SCY_orf04443_1	AMP21998.1	ABK72009.1	CDO89237.1	CCP44915.1	ABL04736.1	ABM14283.1
CAM62183.1	AAS04203.1	ADT98996.1	ABL92420.1	CAC31669.1	ACC41558.1	SCY_orf04445_1	AMP21999.1	ABK73785.1	CDO89238.1	CCP44916.1	ABL04737.1	ABM14284.1
CAM62099.1	AAS04206.1	ADT98974.1	ABL92504.1	CAC31303.1	ACC41611.1	SCY_orf04460_1	AMP22029.1	ABK72820.1	CDO89246.1	CCP44921.1	ABL05648.1	ABM14310.1
CAM62098.1	AAS04207.1	ADT98973.1	ABL92505.1	CAC31302.1	ACC41612.1	SCY_orf04461_1	AMP22030.1	ABK76142.1	CDO89247.1	CCP44922.1	ABL05649.1	ABM14311.1
CAM62094.1	AAS04208.1	ADT98972.1	ABL92506.1	CAC31301.1	ACC41613.1	SCY_orf04463_1	AMP22031.1	ABK71309.1	CDO89248.1	CCP44923.1	ABL05650.1	ABM14312.1
CAM62091.1	AAS04211.1	ADT98969.1	ABL92509.1	CAC31298.1	ACC41616.1	SCY_orf04467_1	AMP25860.1	ABK69814.1	CDO89251.1	CCP44926.1	ABL05653.1	ABM14315.1
CAM62089.1	AAS04213.1	ADT98967.1	ABL92511.1	CAC31296.1	ACC41618.1	SCY_orf04468_1	AMP22035.1	ABK71244.1	CDO89253.1	CCP44928.1	ABL05655.1	ABM14317.1
CAM62088.1	AAS04214.1	ADT98966.1	ABL92512.1	CAC31295.1	ACC41619.1	SCY_orf04471_1	AMP22036.1	ABK70265.1	CDO89254.1	CCP44929.1	ABL05656.1	ABM14318.1
CAM62085.1	AAS04217.1	ADT98963.1	ABL92515.1	CAC31292.1	ACC41622.1	SCY_orf04475_1	AMP22039.1	ABK73185.1	CDO89257.1	CCP44932.1	ABL05659.1	ABM14321.1
CAM62084.1	AAS04218.1	ADT98962.1	ABL92516.1	CAC31291.1	ACC41623.1	SCY_orf04476_1	AMP22040.1	ABK75277.1	CDO89258.1	CCP44933.1	ABL05660.1	ABM14322.1
CAM62082.1	AAS04220.1	ADT98960.1	ABL92518.1	CAC31289.1	ACC41626.1	SCY_orf04487_1	AMP22043.1	ABK71440.1	CDO89260.1	CCP44940.1	ABL05663.1	ABM14324.1
CAM62080.1	AAS04222.1	ADT98958.1	ABL92520.1	CAC31287.1	ACC41628.1	SCY_orf04491_1	AMP25863.1	ABK70680.1	CDO89262.1	CCP44942.1	ABL05665.1	ABM14326.1
CAM62079.1	AAS04223.1	ADT98957.1	ABL92521.1	CAC31286.1	ACC41629.1	SCY_orf04492_1	AMP22045.1	ABK71397.1	CDO89263.1	CCP44943.1	ABL05666.1	ABM14327.1
CAM64691.1	AAS04227.1	ADU01654.1	ABL94473.1	CAC31282.1	ACC41633.1	SCY_orf04498_1	AMP22048.1	ABK74965.1	CDO89267.1	CCP44949.1	ABL05670.1	ABM16535.1
CAM62068.1	AAS04234.1	ADT98948.1	ABL92530.1	CAC31276.1	ACC41649.1	SCY_orf04510_1	AMP22055.1	ABK74248.1	CDO89278.1	CCP44956.1	ABL05683.1	ABM14336.1
CAM62066.1	AAS04237.1	ADT98945.1	ABL92533.1	CAC31273.1	ACC41652.1	SCY_orf04514_1	AMP22056.1	ABK70364.1	CDO89281.1	CCP44959.1	ABL05686.1	ABM14339.1
CAM62063.1	AAS04240.1	ADT98942.1	ABL92536.1	CAC31270.1	ACC41655.1	SCY_orf04518_1	AMP22057.1	ABK76083.1	CDO89284.1	CCP44962.1	ABL05689.1	ABM14342.1
CAM62061.1	AAS04241.1	ADT98941.1	ABL92537.1	CAC31269.1	ACC41656.1	SCY_orf04520_1	AMP22058.1	ABK70363.1	CDO89285.1	CCP44963.1	ABL05690.1	ABM14343.1
CAM62058.1	AAS04243.1	ADT98939.1	ABL92541.1	CAC31267.1	ACC41658.1	SCY_orf04523_1	AMP25870.1	ABK74170.1	CDO89287.1	CCP44965.1	ABL05692.1	ABM14345.1
CAM62051.1	AAS04249.1	ADT98933.1	ABL92547.1	CAC31263.1	ACC41664.1	SCY_orf04529_1	AMP22062.1	ABK69740.1	CDO89294.1	CCP44970.1	ABL05696.1	ABM14351.1
CAM62050.1	AAS04250.1	ADT98932.1	ABL92548.1	CAC31262.1	ACC41665.1	SCY_orf04530_1	AMP22063.1	ABK75074.1	CDO89295.1	CCP44971.1	ABL05697.1	ABM14352.1
CAM62049.1	AAS04251.1	ADT98931.1	ABL92549.1	CAC31261.1	ACC41666.1	SCY_orf04531_1	AMP22064.1	ABK75942.1	CDO89296.1	CCP44972.1	ABL05698.1	ABM14353.1
CAM62044.1	AAS04256.1	ADT98927.1	ABL92553.1	CAC31257.1	ACC41670.1	SCY_orf04538_1	AMP22068.1	ABK69679.1	CDO89302.1	CCP44976.1	ABL05702.1	ABM14357.1
CAM62043.1	AAS04257.1	ADT98926.1	ABL92554.1	CAC31256.1	ACC41671.1	SCY_orf04540_1	AMP25874.1	ABK74914.1	CDO89303.1	CCP44977.1	ABL05703.1	ABM14358.1
CAM62042.1	AAS04258.1	ADT98925.1	ABL92555.1	CAC31255.1	ACC41672.1	SCY_orf04542_1	AMP22069.1	ABK71258.1	CDO89304.1	CCP44978.1	ABL05704.1	ABM14359.1
CAM62041.1	AAS04259.1	ADT98924.1	ABL92556.1	CAC31254.1	ACC41673.1	SCY_orf04543_1	AMP25875.1	ABK72836.1	CDO89305.1	CCP44979.1	ABL05705.1	ABM14360.1
CAM62039.1	AAS04261.1	ADT98922.1	ABL92558.1	CAC31252.1	ACC41675.1	SCY_orf04545_1	AMP22071.1	ABK69803.1	CDO89307.1	CCP44981.1	ABL05707.1	ABM14362.1
CAM62035.1	AAS04265.1	ADT98919.1	ABL92561.1	CAC31249.1	ACC41679.1	SCY_orf04550_1	AMP22073.1	ABK72290.1	CDO89311.1	CCP44984.1	ABL05711.1	ABM14365.1
CAM62032.1	AAS04267.1	ADT98917.1	ABL92564.1	CAC31247.1	ACC41682.1	SCY_orf04553_1	AMP22075.1	ABK74679.1	CDO89313.1	CCP44987.1	ABL05716.1	ABM14367.1
CAM62031.1	AAS04268.1	ADT98916.1	ABL92565.1	CAC31246.1	ACC41683.1	SCY_orf04554_1	AMP22076.1	ABK75389.1	CDO89314.1	CCP44988.1	ABL05717.1	ABM14368.1
CAM62030.1	AAS04270.1	ADT98915.1	ABL92566.1	CAC31245.1	ACC41685.1	SCY_orf04556_1	AMP22078.1	ABK69564.1	CDO89316.1	CCP44990.1	ABL05718.1	ABM14369.1
CAM62027.1	AAS04273.1	ADT98912.1	ABL92569.1	CAC31242.1	ACC41687.1	SCY_orf04562_1	AMP22083.1	ABK73238.1	CDO89318.1	CCP44992.1	ABL05720.1	ABM14373.1
CAM62025.1	AAS04275.1	ADT98910.1	ABL92571.1	CAC31240.1	ACC41711.1	SCY_orf04567_1	AMP22085.1	ABK70306.1	CDO89322.1	CCP44994.1	ABL03897.1	ABM14375.1
CAM62023.1	AAS04277.1	ADT98908.1	ABL92573.1	CAC31238.1	ACC41713.1	SCY_orf04570_1	AMP22087.1	ABK73069.1	CDO89324.1	CCP44996.1	ABL03895.1	ABM14377.1
CAM62004.1	AAS04282.1	ADT98900.1	ABL92583.1	CAC30581.1	ACC41719.1	SCY_orf04588_1	AMP25878.1	ABK72782.1	CDO89331.1	CCP44999.1	ABL03890.1	ABM14389.1
CAM62003.1	AAS04283.1	ADT98899.1	ABL92584.1	CAC30582.1	ACC41720.1	SCY_orf04589_1	AMP22099.1	ABK76204.1	CDO89332.1	CCP45000.1	ABL03889.1	ABM14390.1
CAM61999.1	AAS04287.1	ADT98893.1	ABL92588.1	CAC30586.1	ACC41725.1	SCY_orf04596_1	AMP25879.1	ABK69960.1	CDO89337.1	CCP45003.1	ABL03885.1	ABM14394.1
CAM61988.1	AAS04297.1	ADT98884.1	ABL92598.1	CAC30588.1	ACC41730.1	SCY_orf04605_1	AMP22106.1	ABK69912.1	CDO89344.1	CCP45006.1	ABL03882.1	ABM14409.1
CAM61969.1	AAS04309.1	ADT98873.1	ABL92616.1	CAC30600.1	ACC41758.1	SCY_orf04657_1	AMP22118.1	ABK73676.1	CDO89364.1	CCP45019.1	ABL03870.1	ABM14532.1
CAM61967.1	AAS04311.1	ADT98871.1	ABL92618.1	CAC30602.1	ACC41760.1	SCY_orf04661_1	AMP22119.1	ABK72760.1	CDO89366.1	CCP45021.1	ABL03868.1	ABM14534.1
CAM61963.1	AAS04312.1	ADT98870.1	ABL92619.1	CAC30603.1	ACC41761.1	SCY_orf04662_1	AMP22120.1	ABK70382.1	CDO89367.1	CCP45022.1	ABL03867.1	ABM14535.1
CAM61962.1	AAS04313.1	ADT98869.1	ABL92620.1	CAC30604.1	ACC41762.1	SCY_orf04663_1	AMP22121.1	ABK74111.1	CDO89368.1	CCP45023.1	ABL03866.1	ABM14536.1
CAM61961.1	AAS04314.1	ADT98868.1	ABL92621.1	CAC30605.1	ACC41763.1	SCY_orf04664_1	AMP22122.1	ABK73710.1	CDO89369.1	CCP45024.1	ABL03865.1	ABM14537.1
CAM61959.1	AAS04317.1	ADT98865.1	ABL92624.1	CAC30608.1	ACC41766.1	SCY_orf04668_1	AMP22125.1	ABK75426.1	CDO89372.1	CCP45027.1	ABL03862.1	ABM14540.1
CAM61793.1	AAS04447.1	ADT98813.1	ABL92699.1	CAC30343.1	ACC42066.1	SCY_orf04919_1	AMP22257.1	ABK71657.1	CDO89587.1	CCP45131.1	ABL03985.1	ABM14595.1
CAM61792.1	AAS04449.1	ADT98812.1	ABL92700.1	CAC30341.1	ACC42067.1	SCY_orf04923_1	AMP22258.1	ABK72246.1	CDO89589.1	CCP45132.1	ABL03984.1	ABM14596.1
CAM61787.1	AAS04454.1	ADT98810.1	ABL92702.1	CAC30336.1	ACC42083.1	SCY_orf04930_1	AMP22263.1	ABK70352.1	CDO89597.1	CCP45145.1	ABL05746.1	ABM14599.1
CAM61764.1	AAS04455.1	ADT98809.1	ABL92703.1	CAC30335.1	ACC42084.1	SCY_orf04932_1	AMP22264.1	ABK70589.1	CDO89598.1	CCP45146.1	ABL05747.1	ABM14600.1
CAM61763.1	AAS04456.1	ADT98808.1	ABL92704.1	CAC30334.1	ACC42085.1	SCY_orf04933_1	AMP22265.1	ABK72894.1	CDO89599.1	CCP45147.1	ABL05748.1	ABM14601.1
CAM61760.1	AAS04459.1	ADT98804.1	ABL92707.1	CAC30141.1	ACC42088.1	SCY_orf04938_1	AMP25920.1	ABK69764.1	CDO89602.1	CCP45150.1	ABL05751.1	ABM14604.1
CAM61757.1	AAS04462.1	ADT98801.1	ABL92709.1	CAC30139.1	ACC42090.1	SCY_orf04945_1	AMP22272.1	ABK76178.1	CDO89605.1	CCP45152.1	ABL05753.1	ABM14609.1
CAM61754.1	AAS04476.1	ADT98798.1	ABL92712.1	CAC30136.1	ACC42093.1	SCY_orf04947_1	AMP22276.1	ABK69739.1	CDO89609.1	CCP45155.1	ABL05755.1	ABM14612.1
CAM61753.1	AAS04477.1	ADT98797.1	ABL92713.1	CAC30135.1	ACC42094.1	SCY_orf04950_1	AMP22277.1	ABK70741.1	CDO89610.1	CCP45156.1	ABL05756.1	ABM14613.1
CAM61751.1	AAS04479.1	ADT98793.1	ABL92716.1	CAC30133.1	ACC42099.1	SCY_orf04954_1	AMP22278.1	ABK73378.1	CDO89612.1	CCP45161.1	ABL05760.1	ABM14617.1
CAM61750.1	AAS04480.1	ADT98792.1	ABL92717.1	CAC30132.1	ACC42100.1	SCY_orf04958_1	AMP22279.1	ABK74546.1	CDO89613.1	CCP45162.1	ABL05761.1	ABM14618.1
CAM61737.1	AAS04530.1	ADT98769.1	ABL92739.1	CAC30123.1	ACC42134.1	SCY_orf04997_1	AMP25927.1	ABK71033.1	CDO89657.1	CCP45190.1	ABL05790.1	ABM14656.1
CAM61725.1	AAS04534.1	ADT98764.1	ABL92750.1	CAC30119.1	ACC42140.1	SCY_orf05003_1	AMP22308.1	ABK71117.1	CDO89661.1	CCP45195.1	ABL05796.1	ABM14662.1
CAM61722.1	AAS04538.1	ADT98759.1	ABL92773.1	CAC30115.1	ACC42146.1	SCY_orf05009_1	AMP22312.1	ABK75852.1	CDO89672.1	CCP45200.1	ABL05802.1	ABM14686.1
CAM61721.1	AAS04539.1	ADT98758.1	ABL92774.1	CAC30114.1	ACC42147.1	SCY_orf05010_1	AMP22313.1	ABK75734.1	CDO89673.1	CCP45201.1	ABL05803.1	ABM14687.1
CAM61720.1	AAS04540.1	ADT98757.1	ABL92775.1	CAC30113.1	ACC42148.1	SCY_orf05011_1	AMP22314.1	ABK69622.1	CDO89674.1	CCP45202.1	ABL05804.1	ABM14688.1
CAM61719.1	AAS04541.1	ADT98756.1	ABL92776.1	CAC30112.1	ACC42149.1	SCY_orf05013_1	AMP25928.1	ABK69738.1	CDO89675.1	CCP45203.1	ABL05805.1	ABM14689.1
CAM61718.1	AAS04542.1	ADT98755.1	ABL92777.1	CAC30111.1	ACC42150.1	SCY_orf05014_1	AMP22315.1	ABK72472.1	CDO89676.1	CCP45204.1	ABL05806.1	ABM14690.1
CAM61708.1	AAS04559.1	ADT98744.1	ABL92795.1	CAC30402.1	ACC42163.1	SCY_orf05033_1	AMP22328.1	ABK71654.1	CDO89691.1	CCP45210.1	ABL05819.1	ABM14701.1
CAM61706.1	AAS04561.1	ADT98742.1	ABL92797.1	CAC30404.1	ACC42165.1	SCY_orf05034_1	AMP22330.1	ABK71019.1	CDO89693.1	CCP45212.1	ABL05820.1	ABM14703.1
CAM61703.1	AAS04564.1	ADT98733.1	ABL92805.1	CAC30408.1	ACC42169.1	SCY_orf05039_1	AMP22333.1	ABK73874.1	CDO89698.1	CCP45218.1	ABL05823.1	ABM14711.1
CAM61698.1	AAS04580.1	ADT98727.1	ABL92814.1	CAC30414.1	ACC42180.1	SCY_orf05068_1	AMP25930.1	ABK71775.1	CDO89721.1	CCP45232.1	ABL05833.1	ABM14720.1
CAM61697.1	AAS04581.1	ADT98726.1	ABL92815.1	CAC30415.1	ACC42181.1	SCY_orf05069_1	AMP22349.1	ABK73963.1	CDO89722.1	CCP45233.1	ABL05834.1	ABM14721.1
CAM61696.1	AAS04582.1	ADT98725.1	ABL92816.1	CAC30416.1	ACC42182.1	SCY_orf05071_1	AMP22350.1	ABK73657.1	CDO89723.1	CCP45234.1	ABL05835.1	ABM14722.1
CAM61695.1	AAS04583.1	ADT98724.1	ABL92817.1	CAC30417.1	ACC42183.1	SCY_orf05072_1	AMP22351.1	ABK75887.1	CDO89724.1	CCP45235.1	ABL05836.1	ABM14723.1
CAM61691.1	AAS04585.1	ADT98722.1	ABL92819.1	CAC30419.1	ACC42185.1	SCY_orf05075_1	AMP22353.1	ABK70634.1	CDO89727.1	CCP45238.1	ABL05838.1	ABM14725.1
CAM61688.1	AAS04588.1	ADT98719.1	ABL92825.1	CAC30422.1	ACC42188.1	SCY_orf05079_1	AMP22356.1	ABK74879.1	CDO89730.1	CCP45241.1	ABL05841.1	ABM14728.1
CAM61668.1	AAS04595.1	ADT98680.1	ABL92843.1	CAC30427.1	ACC42215.1	SCY_orf05089_1	AMP22361.1	ABK71712.1	CDO89738.1	CCP45250.1	ABL05850.1	ABM14813.1
CAM61667.1	AAS04597.1	ADT98677.1	ABL92844.1	CAC30429.1	ACC42217.1	SCY_orf05090_1	AMP22362.1	ABK75861.1	CDO89740.1	CCP45253.1	ABL05852.1	ABM14816.1
CAM61666.1	AAS04598.1	ADT98676.1	ABL92845.1	CAC30430.1	ACC42218.1	SCY_orf05091_1	AMP22363.1	ABK73665.1	CDO89741.1	CCP45254.1	ABL05853.1	ABM14817.1
CAM61659.1	AAS04602.1	ADT98670.1	ABL92866.1	CAC30434.1	ACC42223.1	SCY_orf05098_1	AMP25932.1	ABK71161.1	CDO89745.1	CCP45258.1	ABL05858.1	ABM14830.1
CAM61656.1	AAS04604.1	ADT98665.1	ABL92872.1	CAC30436.1	ACC42227.1	SCY_orf05101_1	AMP22368.1	ABK69575.1	CDO89747.1	CCP45260.1	ABL05860.1	ABM14834.1
CAM61652.1	AAS04607.1	ADT98661.1	ABL92876.1	CAC31635.1	ACC42230.1	SCY_orf05106_1	AMP22371.1	ABK72856.1	CDO89750.1	CCP45263.1	ABL05863.1	ABM14840.1
CAM61651.1	AAS04608.1	ADT98660.1	ABL92877.1	CAC31634.1	ACC42231.1	SCY_orf05107_1	AMP22372.1	ABK72717.1	CDO89751.1	CCP45264.1	ABL05864.1	ABM14843.1
CAM61645.1	AAS04612.1	ADT98656.1	ABL92882.1	CAC31629.1	ACC42240.1	SCY_orf05118_1	AMP22378.1	ABK70014.1	CDO89757.1	CCP45271.1	ABL05870.1	ABM14847.1
CAM61622.1	AAS04635.1	ADT98633.1	ABL92905.1	CAC29937.1	ACC42267.1	SCY_orf05172_1	AMP25934.1	ABK71182.1	CDO89786.1	CCP45303.1	ABL05892.1	ABM14875.1
CAM61618.1	AAS04637.1	ADT98631.1	ABL92907.1	CAC29935.1	ACC42270.1	SCY_orf05174_1	AMP22400.1	ABK75417.1	CDO89788.1	CCP45305.1	ABL05893.1	ABM14877.1
CAM61601.1	AAS04646.1	ADT98623.1	ABL92911.1	CAC29932.1	ACC42364.1	SCY_orf05188_1	AMP25936.1	ABK74299.1	CDO89797.1	CCP45315.1	ABL05909.1	ABM14897.1
CAM61599.1	AAS04648.1	ADT98621.1	ABL92914.1	CAC31573.1	ACC42369.1	SCY_orf05208_1	AMP22423.1	ABK75003.1	CDO89800.1	CCP45317.1	ABL05912.1	ABM14901.1
CAM61598.1	AAS04649.1	ADT98620.1	ABL92915.1	CAC31572.1	ACC42370.1	SCY_orf05211_1	AMP25937.1	ABK70103.1	CDO89801.1	CCP45318.1	ABL05913.1	ABM14902.1
CAM61570.1	AAS04739.1	ADT98453.1	ABL93110.1	CAC31555.1	ACC42449.1	SCY_orf05339_1	AMP22508.1	ABK70048.1	CDO89899.1	CCP44098.1	ABL05979.1	ABM15064.1
CAM61569.1	AAS04740.1	ADT98452.1	ABL93111.1	CAC31554.1	ACC42450.1	SCY_orf05341_1	AMP22509.1	ABK72005.1	CDO89900.1	CCP44097.1	ABL05980.1	ABM15065.1
CAM61568.1	AAS04741.1	ADT98451.1	ABL93112.1	CAC31553.1	ACC42465.1	SCY_orf05343_1	AMP22510.1	ABK72762.1	CDO89901.1	CCP44096.1	ABL05995.1	ABM15066.1
CAM61561.1	AAS04746.1	ADT98444.1	ABL93119.1	CAC31546.1	ACC42474.1	SCY_orf05348_1	AMP22515.1	ABK74771.1	CDO89908.1	CCP44089.1	ABL06000.1	ABM15073.1
CAM61549.1	AAS04753.1	ADT98435.1	ABL93130.1	CAC31539.1	ACC42482.1	SCY_orf05356_1	AMP22522.1	ABK71664.1	CDO89915.1	CCP44081.1	ABL06007.1	ABM15082.1
CAM61548.1	AAS04754.1	ADT98434.1	ABL93131.1	CAC31538.1	ACC42483.1	SCY_orf05357_1	AMP22523.1	ABK73156.1	CDO89916.1	CCP44080.1	ABL06008.1	ABM15083.1
CAM61546.1	AAS04756.1	ADT98432.1	ABL93133.1	CAC31536.1	ACC42484.1	SCY_orf05359_1	AMP22524.1	ABK73844.1	CDO89917.1	CCP44078.1	ABL06009.1	ABM15085.1
CAM61543.1	AAS04764.1	ADT98419.1	ABL93138.1	CAC31531.1	ACC42490.1	SCY_orf05375_1	AMP22528.1	ABK72461.1	CDO89926.1	CCP44072.1	ABL06015.1	ABM15101.1
CAM61542.1	AAS04765.1	ADT98418.1	ABL93139.1	CAC31530.1	ACC42491.1	SCY_orf05376_1	AMP25948.1	ABK69847.1	CDO89927.1	CCP44071.1	ABL06016.1	ABM15102.1
CAM61540.1	AAS04767.1	ADT98416.1	ABL93141.1	CAC31527.1	ACC42493.1	SCY_orf05378_1	AMP22529.1	ABK70189.1	CDO89929.1	CCP44068.1	ABL06018.1	ABM15104.1
CAM61539.1	AAS04768.1	ADT98415.1	ABL93142.1	CAC31526.1	ACC42494.1	SCY_orf05379_1	AMP22530.1	ABK74032.1	CDO89930.1	CCP44067.1	ABL06019.1	ABM15105.1
CAM61538.1	AAS04769.1	ADT98414.1	ABL93143.1	CAC31525.1	ACC42495.1	SCY_orf05381_1	AMP22531.1	ABK75438.1	CDO89931.1	CCP44066.1	ABL06020.1	ABM15106.1
CAM61537.1	AAS04770.1	ADT98413.1	ABL93144.1	CAC31524.1	ACC42496.1	SCY_orf05384_1	AMP22532.1	ABK72810.1	CDO89932.1	CCP44065.1	ABL06021.1	ABM15107.1
CAM61534.1	AAS04773.1	ADT98410.1	ABL93147.1	CAC31521.1	ACC42499.1	SCY_orf05388_1	AMP22535.1	ABK70018.1	CDO89935.1	CCP44062.1	ABL06024.1	ABM15110.1
CAM61533.1	AAS04774.1	ADT98409.1	ABL93148.1	CAC31520.1	ACC42500.1	SCY_orf05389_1	AMP22536.1	ABK72074.1	CDO89936.1	CCP44061.1	ABL06025.1	ABM15111.1
CAM61531.1	AAS04776.1	ADT98407.1	ABL93150.1	CAC31518.1	ACC42502.1	SCY_orf05391_1	AMP25950.1	ABK71461.1	CDO89938.1	CCP44059.1	ABL06027.1	ABM15113.1
CAM61530.1	AAS04777.1	ADT98406.1	ABL93151.1	CAC31517.1	ACC42503.1	SCY_orf05393_1	AMP22538.1	ABK69723.1	CDO89939.1	CCP44058.1	ABL06028.1	ABM15114.1
CAM61528.1	AAS04779.1	ADT98404.1	ABL93153.1	CAC31515.1	ACC42505.1	SCY_orf05396_1	AMP22540.1	ABK71750.1	CDO89941.1	CCP44056.1	ABL06030.1	ABM15116.1
CAM61527.1	AAS04780.1	ADT98403.1	ABL93154.1	CAC31514.1	ACC42506.1	SCY_orf05398_1	AMP25951.1	ABK71247.1	CDO89942.1	CCP44055.1	ABL06031.1	ABM15117.1
CAM61522.1	AAS04784.1	ADT98396.1	ABL93161.1	CAC31511.1	ACC42509.1	SCY_orf05402_1	AMP22543.1	ABK71073.1	CDO89945.1	CCP44052.1	ABL06034.1	ABM15124.1
CAM61521.1	AAS04785.1	ADT98395.1	ABL93162.1	CAC31510.1	ACC42510.1	SCY_orf05403_1	AMP22544.1	ABK75362.1	CDO89946.1	CCP44051.1	ABL06035.1	ABM15125.1
CAM61520.1	AAS04786.1	ADT98394.1	ABL93163.1	CAC31509.1	ACC42511.1	SCY_orf05405_1	AMP22545.1	ABK70119.1	CDO89947.1	CCP44050.1	ABL06036.1	ABM15126.1
CAM61519.1	AAS04787.1	ADT98393.1	ABL93164.1	CAC31508.1	ACC42512.1	SCY_orf05407_1	AMP22546.1	ABK70921.1	CDO89948.1	CCP44049.1	ABL06037.1	ABM15127.1
CAM61506.1	AAS04811.1	ADT98354.1	ABL93201.1	CAC31500.1	ACC42550.1	SCY_orf05463_1	AMP22576.1	ABK75618.1	CDO89995.1	CCP44033.1	ABL06067.1	ABM15212.1
CAM61500.1	AAS04817.1	ADT98349.1	ABL93207.1	CAC31494.1	ACC42555.1	SCY_orf05477_1	AMP22580.1	ABK73102.1	CDO90001.1	CCP44028.1	ABL06072.1	ABM15217.1
CAM61493.1	AAS04834.1	ADT98329.1	ABL93227.1	CAC31484.1	ACC42590.1	SCY_orf05497_1	AMP25962.1	ABK74357.1	CDO90022.1	CCP44013.1	ABL06455.1	ABM15239.1
CAM61479.1	AAS04853.1	ADT98317.1	ABL93239.1	CAC31476.1	ACC42602.1	SCY_orf05527_1	AMP22605.1	ABK74238.1	CDO90031.1	CCP44004.1	ABL06466.1	ABM15252.1
CAM61452.1	AAS04870.1	ADT98304.1	ABL93256.1	CAC31461.1	ACC42620.1	SCY_orf05551_1	AMP25966.1	ABK73693.1	CDO90048.1	CCP43985.1	ABL06478.1	ABM15267.1
CAM61451.1	AAS04871.1	ADT98303.1	ABL93257.1	CAC31460.1	ACC42621.1	SCY_orf05552_1	AMP22620.1	ABK74185.1	CDO90049.1	CCP43980.1	ABL06479.1	ABM15268.1
CAM61450.1	AAS04872.1	ADT98302.1	ABL93258.1	CAC31459.1	ACC42622.1	SCY_orf05554_1	AMP22621.1	ABK71828.1	CDO90050.1	CCP43979.1	ABL06480.1	ABM15269.1
CAM61449.1	AAS04873.1	ADT98301.1	ABL93259.1	CAC31458.1	ACC42623.1	SCY_orf05555_1	AMP25967.1	ABK72380.1	CDO90051.1	CCP43978.1	ABL06481.1	ABM15270.1
CAM61448.1	AAS04874.1	ADT98300.1	ABL93260.1	CAC31457.1	ACC42624.1	SCY_orf05556_1	AMP22622.1	ABK70433.1	CDO90052.1	CCP43977.1	ABL06482.1	ABM15271.1
CAM61447.1	AAS04875.1	ADT98299.1	ABL93261.1	CAC31456.1	ACC42625.1	SCY_orf05557_1	AMP22623.1	ABK70516.1	CDO90053.1	CCP43976.1	ABL06483.1	ABM15272.1
CAM61440.1	AAS04881.1	ADT98292.1	ABL93266.1	CAC31450.1	ACC42633.1	SCY_orf05565_1	AMP22628.1	ABK75991.1	CDO90059.1	CCP43969.1	ABL06486.1	ABM15278.1
CAM61437.1	AAS04884.1	ADT98288.1	ABL93269.1	CAC31447.1	ACC42636.1	SCY_orf05571_1	AMP22630.1	ABK74511.1	CDO90062.1	CCP43966.1	ABL03583.1	ABM15281.1
CAM61434.1	AAS04886.1	ADT98286.1	ABL93271.1	CAC31445.1	ACC42638.1	SCY_orf05572_1	AMP22632.1	ABK73566.1	CDO90064.1	CCP43964.1	ABL03581.1	ABM15283.1
CAM61433.1	AAS04887.1	ADT98285.1	ABL93272.1	CAC31444.1	ACC42639.1	SCY_orf05574_1	AMP22633.1	ABK74555.1	CDO90065.1	CCP43963.1	ABL03580.1	ABM15284.1
CAM61429.1	AAS04889.1	ADT98283.1	ABL93274.1	CAC31442.1	ACC42641.1	SCY_orf05577_1	AMP22635.1	ABK70767.1	CDO90067.1	CCP43961.1	ABL03578.1	ABM15286.1
CAM61424.1	AAS04891.1	ADT98279.1	ABL93278.1	CAC31440.1	ACC42643.1	SCY_orf05584_1	AMP22637.1	ABK70853.1	CDO90069.1	CCP43958.1	ABL03576.1	ABM15290.1
CAM61423.1	AAS04895.1	ADT98278.1	ABL93279.1	CAC31439.1	ACC42644.1	SCY_orf05585_1	AMP22638.1	ABK71765.1	CDO90071.1	CCP43957.1	ABL03575.1	ABM15294.1
CAM61420.1	AAS04897.1	ADT98274.1	ABL93287.1	CAC31432.1	ACC42651.1	SCY_orf05588_1	AMP25969.1	ABK70979.1	CDO90073.1	CCP43949.1	ABL03566.1	ABM15297.1
CAM61416.1	AAS04923.1	ADT98270.1	ABL93296.1	CAC30438.1	ACC42682.1	SCY_orf05652_1	AMP22652.1	ABK72850.1	CDO90099.1	CCP43934.1	ABL03634.1	ABM15303.1
CAM61415.1	AAS04924.1	ADT98269.1	ABL93297.1	CAC30439.1	ACC42683.1	SCY_orf05653_1	AMP22653.1	ABK71726.1	CDO90100.1	CCP43933.1	ABL03633.1	ABM15304.1
CAM61407.1	AAS04928.1	ADT98267.1	ABL93299.1	CAC30442.1	ACC42688.1	SCY_orf05657_1	AMP25975.1	ABK71669.1	CDO90104.1	CCP43929.1	ABL03628.1	ABM15308.1
CAM61398.1	AAS04933.1	ADT98262.1	ABL93307.1	CAC30448.1	ACC42695.1	SCY_orf05668_1	AMP22657.1	ABK75487.1	CDO90110.1	CCP43921.1	ABL03621.1	ABM15315.1
CAM61354.1	AAS04999.1	ADT98176.1	ABL93370.1	CAC30891.1	ACC42760.1	SCY_orf05781_1	AMP22715.1	ABK75062.1	CDO90464.1	CCP43865.1	ABL02920.1	ABM15400.1
CAM61345.1	AAS05001.1	ADT98174.1	ABL93373.1	CAC30893.1	ACC42762.1	SCY_orf05786_1	AMP22717.1	ABK75503.1	CDO90467.1	CCP43863.1	ABL02922.1	ABM15406.1
CAM61343.1	AAS05003.1	ADT98172.1	ABL93375.1	CAC30895.1	ACC42764.1	SCY_orf05788_1	AMP22719.1	ABK74093.1	CDO90469.1	CCP43861.1	ABL02924.1	ABM15408.1
CAM61342.1	AAS05004.1	ADT98171.1	ABL93376.1	CAC30896.1	ACC42765.1	SCY_orf05789_1	AMP22720.1	ABK72505.1	CDO90470.1	CCP43860.1	ABL02925.1	ABM15409.1
CAM61339.1	AAS05009.1	ADT98162.1	ABL93388.1	CAC30901.1	ACC42774.1	SCY_orf05796_1	AMP25990.1	ABK73748.1	CDO90476.1	CCP43852.1	ABL02933.1	ABM15423.1
CAM61338.1	AAS05010.1	ADT98161.1	ABL93389.1	CAC30902.1	ACC42775.1	SCY_orf05798_1	AMP22724.1	ABK75151.1	CDO90477.1	CCP43851.1	ABL02934.1	ABM15424.1
CAM61322.1	AAS05017.1	ADT98154.1	ABL93400.1	CAC30909.1	ACC42783.1	SCY_orf05808_1	AMP22729.1	ABK71855.1	CDO90484.1	CCP43845.1	ABL02940.1	ABM15433.1
CAM61297.1	AAS05020.1	ADT98151.1	ABL93404.1	CAC31984.1	ACC42787.1	SCY_orf05811_1	AMP22735.1	ABK70340.1	CDO90489.1	CCP43837.1	ABL02944.1	ABM15437.1
CAM61291.1	AAS03346.1	ADT98147.1	ABL93409.1	CAC31907.1	ACC42792.1	SCY_orf05820_1	AMP22739.1	ABK75043.1	CDO90493.1	CCP43833.1	ABL02949.1	ABM15442.1
CAM61289.1	AAS03344.1	ADT98145.1	ABL93411.1	CAC31909.1	ACC42794.1	SCY_orf05823_1	AMP22740.1	ABK71387.1	CDO90495.1	CCP43831.1	ABL02951.1	ABM15443.1
CAM61285.1	AAS03343.1	ADT98143.1	ABL93413.1	CAC31910.1	ACC42795.1	SCY_orf05824_1	AMP22741.1	ABK69767.1	CDO90496.1	CCP43830.1	ABL02952.1	ABM15445.1
CAM61283.1	AAS03341.1	ADT98140.1	ABL93416.1	CAC31912.1	ACC42797.1	SCY_orf05826_1	AMP22742.1	ABK75142.1	CDO90498.1	CCP43828.1	ABL02954.1	ABM15449.1
CAM61275.1	AAS03335.1	ADT98134.1	ABL93422.1	CAC31917.1	ACC42802.1	SCY_orf05835_1	AMP22747.1	ABK72254.1	CDO90503.1	CCP43822.1	ABL02959.1	ABM15455.1
CAM61273.1	AAS03334.1	ADT98133.1	ABL93423.1	CAC31918.1	ACC42803.1	SCY_orf05836_1	AMP22748.1	ABK69885.1	CDO90504.1	CCP43821.1	ABL02960.1	ABM15456.1
CAM61256.1	AAS03310.1	ADT98038.1	ABL93514.1	CAC29766.1	ACC42866.1	SCY_orf05884_1	AMP22764.1	ABK72775.1	CDO90537.1	CCP43776.1	ABL06571.1	ABM15541.1
CAM61255.1	AAS03309.1	ADT98037.1	ABL93515.1	CAC29765.1	ACC42867.1	SCY_orf05885_1	AMP22765.1	ABK72913.1	CDO90538.1	CCP43775.1	ABL06572.1	ABM15542.1
CAM61253.1	AAS03307.1	ADT98035.1	ABL93517.1	CAC29763.1	ACC42869.1	SCY_orf05888_1	AMP22767.1	ABK73932.1	CDO90540.1	CCP43773.1	ABL06574.1	ABM15544.1
CAM61245.1	AAS03304.1	ADT98030.1	ABL93522.1	CAC29760.1	ACC42872.1	SCY_orf05892_1	AMP22768.1	ABK73840.1	CDO90543.1	CCP43770.1	ABL06577.1	ABM15550.1
CAM61236.1	AAS03301.1	ADT98026.1	ABL93525.1	CAC29757.1	ACC42874.1	SCY_orf05898_1	AMP22770.1	ABK75163.1	CDO90547.1	CCP43768.1	ABL06579.1	ABM15555.1
CAM61235.1	AAS03300.1	ADT98025.1	ABL93526.1	CAC29756.1	ACC42875.1	SCY_orf05901_1	AMP22771.1	ABK72893.1	CDO90548.1	CCP43767.1	ABL06580.1	ABM15556.1
CAM61231.1	AAS03296.1	ADT98021.1	ABL93530.1	CAC29753.1	ACC42878.1	SCY_orf05907_1	AMP22782.1	ABK75240.1	CDO90551.1	CCP43765.1	ABL06584.1	ABM15560.1
CAM61230.1	AAS03295.1	ADT98020.1	ABL93531.1	CAC29752.1	ACC42879.1	SCY_orf05908_1	AMP22783.1	ABK75581.1	CDO90552.1	CCP43764.1	ABL06585.1	ABM15561.1
CAM61227.1	AAS03293.1	ADT98016.1	ABL93539.1	CAC29750.1	ACC42883.1	SCY_orf05914_1	AMP22784.1	ABK71884.1	CDO90554.1	CCP43761.1	ABL06588.1	ABM15572.1
CAM61219.1	AAS03292.1	ADT98015.1	ABL93540.1	CAC29749.1	ACC42884.1	SCY_orf05916_1	AMP22785.1	ABK76055.1	CDO90559.1	CCP43760.1	ABL06589.1	ABM15573.1
CAM61217.1	AAS03290.1	ADT98013.1	ABL93542.1	CAC29747.1	ACC42886.1	SCY_orf05919_1	AMP22787.1	ABK72961.1	CDO90561.1	CCP43758.1	ABL06591.1	ABM15575.1
CAM61216.1	AAS03289.1	ADT98012.1	ABL93543.1	CAC29746.1	ACC42887.1	SCY_orf05920_1	AMP22788.1	ABK71311.1	CDO90562.1	CCP43757.1	ABL06592.1	ABM15576.1
CAM61178.1	AAS03243.1	ADT97980.1	ABL93565.1	CAC29692.1	ACC42925.1	SCY_orf05998_1	AMP22914.1	ABK71280.1	CDO90605.1	CCP43745.1	ABL06623.1	ABM15604.1
CAM61177.1	AAS03242.1	ADT97979.1	ABL93566.1	CAC29691.1	ACC42926.1	SCY_orf06001_1	AMP22915.1	ABK74708.1	CDO90606.1	CCP43744.1	ABL06624.1	ABM15605.1
CAM61176.1	AAS03241.1	ADT97978.1	ABL93567.1	CAC29690.1	ACC42927.1	SCY_orf06002_1	AMP22916.1	ABK73209.1	CDO90607.1	CCP43743.1	ABL06625.1	ABM15606.1
CAM61169.1	AAS03236.1	ADT97969.1	ABL93575.1	CAC29685.1	ACC42932.1	SCY_orf06010_1	AMP22921.1	ABK69973.1	CDO90612.1	CCP43734.1	ABL06630.1	ABM15614.1
CAM61167.1	AAS03234.1	ADT97967.1	ABL93577.1	CAC29683.1	ACC42934.1	SCY_orf06013_1	AMP22923.1	ABK75510.1	CDO90614.1	CCP43732.1	ABL06632.1	ABM15616.1
CAM61166.1	AAS03233.1	ADT97966.1	ABL93578.1	CAC29682.1	ACC42935.1	SCY_orf06015_1	AMP26021.1	ABK75202.1	CDO90615.1	CCP43731.1	ABL06633.1	ABM15617.1
CAM61165.1	AAS03232.1	ADT97965.1	ABL93579.1	CAC29681.1	ACC42936.1	SCY_orf06016_1	AMP22924.1	ABK71255.1	CDO90616.1	CCP43729.1	ABL06634.1	ABM15618.1
CAM61154.1	AAS03220.1	ADT97954.1	ABL93596.1	CAC29669.1	ACC42948.1	SCY_orf06041_1	AMP22934.1	ABK73472.1	CDO90628.1	CCP43705.1	ABL06644.1	ABM15629.1
CAM61153.1	AAS03219.1	ADT97953.1	ABL93597.1	CAC29668.1	ACC42949.1	SCY_orf06043_1	AMP22935.1	ABK70354.1	CDO90629.1	CCP43704.1	ABL06645.1	ABM15630.1
CAM61147.1	AAS03214.1	ADT97946.1	ABL93603.1	CAC29664.1	ACC42955.1	SCY_orf06050_1	AMP22939.1	ABK72035.1	CDO90634.1	CCP43700.1	ABL06649.1	ABM15642.1
CAM61146.1	AAS03213.1	ADT97945.1	ABL93604.1	CAC29663.1	ACC42956.1	SCY_orf06053_1	AMP22940.1	ABK71969.1	CDO90635.1	CCP43699.1	ABL06650.1	ABM15643.1
CAM61144.1	AAS03210.1	ADT97942.1	ABL93607.1	CAC29661.1	ACC42959.1	SCY_orf06058_1	AMP22941.1	ABK73537.1	CDO90638.1	CCP43697.1	ABL06653.1	ABM15646.1
CAM61143.1	AAS03209.1	ADT97941.1	ABL93608.1	CAC29659.1	ACC42961.1	SCY_orf06060_1	AMP22942.1	ABK71866.1	CDO90639.1	CCP43696.1	ABL06404.1	ABM15647.1
CAM61141.1	AAS03208.1	ADT97938.1	ABL93611.1	CAC29658.1	ACC42963.1	SCY_orf06062_1	AMP22943.1	ABK73757.1	CDO90640.1	CCP43694.1	ABL06406.1	ABM15650.1
CAM61051.1	AAS03157.1	ADT97822.1	ABL93709.1	CAC31073.1	ACC43028.1	SCY_orf06141_1	AMP23023.1	ABK73808.1	CDO90700.1	CCP43653.1	ABL02980.1	ABM15764.1
CAM61048.1	AAS03151.1	ADT97811.1	ABL93726.1	CAC31078.1	ACC43036.1	SCY_orf06145_1	AMP23026.1	ABK70696.1	CDO90705.1	CCP43651.1	ABL02987.1	ABM15781.1
CAM61036.1	AAS03146.1	ADT97798.1	ABL93734.1	CAC31085.1	ACC43043.1	SCY_orf06157_1	AMP23030.1	ABK72674.1	CDO90710.1	CCP43644.1	ABL02993.1	ABM15794.1
CAM61025.1	AAS03145.1	ADT97796.1	ABL93736.1	CAC31086.1	ACC43045.1	SCY_orf06164_1	AMP23031.1	ABK69700.1	CDO90711.1	CCP45404.1	ABL02995.1	ABM15796.1
CAM61020.1	AAS03140.1	ADT97787.1	ABL93742.1	CAC31091.1	ACC43051.1	SCY_orf06173_1	AMP26045.1	ABK69629.1	CDO90716.1	CCP43632.1	ABL03001.1	ABM15805.1
CAM60969.1	AAS03132.1	ADT97780.1	ABL93750.1	CAC31098.1	ACC43059.1	SCY_orf06184_1	AMP26046.1	ABK73539.1	CDO90724.1	CCP43624.1	ABL03009.1	ABM15812.1
CAM60966.1	AAS03127.1	ADT97777.1	ABL93753.1	CAC31102.1	ACC43064.1	SCY_orf06190_1	AMP23044.1	ABK70368.1	CDO90728.1	CCP43619.1	ABL03014.1	ABM15817.1
CAM60954.1	AAS03116.1	ADT97767.1	ABL93763.1	CAC31112.1	ACC43074.1	SCY_orf06204_1	AMP23052.1	ABK70222.1	CDO90738.1	CCP43609.1	ABL03024.1	ABM15827.1
CAM60849.1	AAS02974.1	ADT97733.1	ABL93790.1	CAC31141.1	ACC43261.1	SCY_orf06410_1	AMP23206.1	ABK76164.1	CDO90898.1	CCP43571.1	ABL03151.1	ABM15857.1
CAM60847.1	AAS02972.1	ADT97731.1	ABL93792.1	CAC31143.1	ACC43263.1	SCY_orf06413_1	AMP23208.1	ABK71681.1	CDO90900.1	CCP43569.1	ABL03150.1	ABM15859.1
CAM60828.1	AAS02960.1	ADT97718.1	ABL93811.1	CAC31155.1	ACC43275.1	SCY_orf06429_1	AMP23219.1	ABK69964.1	CDO90911.1	CCP43561.1	ABL03139.1	ABM15876.1
CAM60824.1	AAS02956.1	ADT97712.1	ABL93816.1	CAC31160.1	ACC43284.1	SCY_orf06439_1	AMP23225.1	ABK69780.1	CDO90917.1	CCP43557.1	ABL03132.1	ABM15882.1
CAM60809.1	AAS02955.1	ADT97710.1	ABL93819.1	CAC31161.1	ACC43285.1	SCY_orf06440_1	AMP23226.1	ABK71241.1	CDO90918.1	CCP43556.1	ABL03131.1	ABM15885.1
CAM60807.1	AAS02954.1	ADT97709.1	ABL93820.1	CAC31162.1	ACC43286.1	SCY_orf06441_1	AMP23227.1	ABK69918.1	CDO90919.1	CCP43555.1	ABL03130.1	ABM15886.1
CAM60803.1	AAS02952.1	ADT97705.1	ABL93824.1	CAC31166.1	ACC43292.1	SCY_orf06449_1	AMP26069.1	ABK75771.1	CDO90922.1	CCP43551.1	ABL03125.1	ABM15890.1
CAM60795.1	AAS02943.1	ADT97700.1	ABL93831.1	CAC31174.1	ACC43301.1	SCY_orf06477_1	AMP23247.1	ABK74696.1	CDO90948.1	CCP43536.1	ABL03118.1	ABM15899.1
CAM60794.1	AAS02942.1	ADT97699.1	ABL93832.1	CAC31175.1	ACC43302.1	SCY_orf06480_1	AMP23248.1	ABK75985.1	CDO90949.1	CCP43535.1	ABL03117.1	ABM15900.1
CAM60786.1	AAS02931.1	ADT97691.1	ABL93839.1	CAC31183.1	ACC43313.1	SCY_orf06488_1	AMP23257.1	ABK73534.1	CDO90959.1	CCP43527.1	ABL03199.1	ABM15909.1
CAM60784.1	AAS02928.1	ADT97688.1	ABL93845.1	CAC31186.1	ACC43320.1	SCY_orf06491_1	AMP23260.1	ABK73202.1	CDO90963.1	CCP43524.1	ABL03192.1	ABM15916.1
CAM60779.1	AAS02923.1	ADT97683.1	ABL93850.1	CAC31191.1	ACC43328.1	SCY_orf06498_1	AMP23265.1	ABK75935.1	CDO90968.1	CCP43519.1	ABL03183.1	ABM15921.1
CAM60773.1	AAS02910.1	ADT97657.1	ABL93867.1	CAC31193.1	ACC43344.1	SCY_orf06521_1	AMP23289.1	ABK71100.1	CDO90984.1	CCP43506.1	ABL03169.1	ABM15944.1
CAM64218.1	AAS02890.1	ADT97640.1	ABL93888.1	CAC31210.1	ACC43382.1	SCY_orf06575_1	AMP23318.1	ABK71484.1	CDO91010.1	CCP46312.1	ABL06105.1	ABM15963.1
CAM60670.1	AAS02796.1	ADU01264.1	ABL94012.1	CAC29832.1	ACC43483.1	SCY_orf06709_1	AMP23396.1	ABK75506.1	CDO91106.1	CCP46402.1	ABL06195.1	ABM16108.1
CAM60669.1	AAS02795.1	ADU01265.1	ABL94013.1	CAC29831.1	ACC43484.1	SCY_orf06711_1	AMP23397.1	ABK74736.1	CDO91107.1	CCP46403.1	ABL06196.1	ABM16109.1
CAM60668.1	AAS02794.1	ADU01266.1	ABL94014.1	CAC29830.1	ACC43485.1	SCY_orf06712_1	AMP26096.1	ABK73227.1	CDO91108.1	CCP46404.1	ABL06197.1	ABM16110.1
CAM60666.1	AAS02792.1	ADU01267.1	ABL94016.1	CAC29828.1	ACC43487.1	SCY_orf06715_1	AMP23399.1	ABK72642.1	CDO91110.1	CCP46406.1	ABL06199.1	ABM16111.1
CAM60656.1	AAS02786.1	ADU01273.1	ABL94022.1	CAC30875.1	ACC43493.1	SCY_orf06723_1	AMP23405.1	ABK72600.1	CDO91116.1	CCP46412.1	ABL06204.1	ABM16117.1
CAM60645.1	AAS02778.1	ADU01283.1	ABL94032.1	CAC29743.1	ACC43504.1	SCY_orf06737_1	AMP23412.1	ABK74692.1	CDO91124.1	CCP46419.1	ABL06213.1	ABM16129.1
CAM60644.1	AAS02777.1	ADU01284.1	ABL94033.1	CAC29742.1	ACC43505.1	SCY_orf06739_1	AMP23413.1	ABK76208.1	CDO91125.1	CCP46420.1	ABL06215.1	ABM16130.1
CAM60643.1	AAS02776.1	ADU01285.1	ABL94034.1	CAC29741.1	ACC43506.1	SCY_orf06740_1	AMP23414.1	ABK73779.1	CDO91126.1	CCP46421.1	ABL06216.1	ABM16131.1
CAM60642.1	AAS02775.1	ADU01287.1	ABL94036.1	CAC29740.1	ACC43507.1	SCY_orf06742_1	AMP23415.1	ABK73269.1	CDO91127.1	CCP46423.1	ABL06217.1	ABM16133.1
CAM60640.1	AAS02773.1	ADU01289.1	ABL94038.1	CAC29738.1	ACC43509.1	SCY_orf06744_1	AMP26098.1	ABK70073.1	CDO91129.1	CCP46425.1	ABL06219.1	ABM16135.1
CAM60635.1	AAS02768.1	ADU01294.1	ABL94043.1	CAC29733.1	ACC43514.1	SCY_orf06753_1	AMP23419.1	ABK71049.1	CDO91134.1	CCP46430.1	ABL06224.1	ABM16140.1
CAM60633.1	AAS02766.1	ADU01296.1	ABL94045.1	CAC29731.1	ACC43516.1	SCY_orf06756_1	AMP23420.1	ABK75591.1	CDO91136.1	CCP46432.1	ABL06226.1	ABM16142.1
CAM60632.1	AAS02765.1	ADU01297.1	ABL94046.1	CAC29730.1	ACC43517.1	SCY_orf06759_1	AMP23421.1	ABK75289.1	CDO91137.1	CCP46433.1	ABL06227.1	ABM16143.1
CAM60622.1	AAS02756.1	ADU01301.1	ABL94051.1	CAC29722.1	ACC43528.1	SCY_orf06772_1	AMP23433.1	ABK72863.1	CDO91147.1	CCP46447.1	ABL06234.1	ABM16148.1
CAM60617.1	AAS02752.1	ADU01305.1	ABL94055.1	CAC29718.1	ACC43532.1	SCY_orf06781_1	AMP23436.1	ABK74943.1	CDO91151.1	CCP46451.1	ABL06238.1	ABM16152.1
CAM60590.1	AAS02744.1	ADU01317.1	ABL94070.1	CAC29710.1	ACC43540.1	SCY_orf06795_1	AMP26107.1	ABK72015.1	CDO91161.1	CCP46467.1	ABL06251.1	ABM16165.1
CAM60589.1	AAS02743.1	ADU01318.1	ABL94071.1	CAC29709.1	ACC43541.1	SCY_orf06796_1	AMP23441.1	ABK72645.1	CDO91162.1	CCP46468.1	ABL06252.1	ABM16166.1
CAM60588.1	AAS02742.1	ADU01319.1	ABL94072.1	CAC29708.1	ACC43542.1	SCY_orf06798_1	AMP23442.1	ABK69586.1	CDO91163.1	CCP46469.1	ABL06253.1	ABM16167.1
CAM60587.1	AAS02741.1	ADU01320.1	ABL94073.1	CAC29707.1	ACC43543.1	SCY_orf06799_1	AMP23443.1	ABK73063.1	CDO91164.1	CCP46470.1	ABL06254.1	ABM16168.1
CAM60586.1	AAS02740.1	ADU01321.1	ABL94074.1	CAC29706.1	ACC43544.1	SCY_orf06800_1	AMP23444.1	ABK75888.1	CDO91165.1	CCP46471.1	ABL06255.1	ABM16169.1
CAM60521.1	AAS02721.1	ADU01337.1	ABL94088.1	CAC31813.1	ACC43564.1	SCY_orf06829_1	AMP23459.1	ABK73054.1	CDO85684.1	CCP46493.1	ABL06273.1	ABM16199.1
CAM60517.1	AAS02717.1	ADU01341.1	ABL94092.1	CAC31817.1	ACC43568.1	SCY_orf06835_1	AMP23463.1	ABK69680.1	CDO85688.1	CCP46497.1	ABL06276.1	ABM16203.1
CAM60515.1	AAS02715.1	ADU01343.1	ABL94094.1	CAC31818.1	ACC43570.1	SCY_orf06838_1	AMP23465.1	ABK71206.1	CDO85690.1	CCP46499.1	ABL06278.1	ABM16205.1
CAM60513.1	AAS02714.1	ADU01347.1	ABL94095.1	CAC31819.1	ACC43571.1	SCY_orf06840_1	AMP23468.1	ABK75967.1	CDO85691.1	CCP46500.1	ABL06279.1	ABM16206.1
CAM60512.1	AAS02713.1	ADU01348.1	ABL94096.1	CAC31820.1	ACC43572.1	SCY_orf06842_1	AMP23469.1	ABK71352.1	CDO85692.1	CCP46501.1	ABL06280.1	ABM16207.1
CAM60510.1	AAS02712.1	ADU01350.1	ABL94098.1	CAC31821.1	ACC43574.1	SCY_orf06844_1	AMP23470.1	ABK72669.1	CDO85694.1	CCP46503.1	ABL06282.1	ABM16209.1
CAM60509.1	AAS02711.1	ADU01351.1	ABL94099.1	CAC31822.1	ACC43575.1	SCY_orf06846_1	AMP23471.1	ABK71139.1	CDO85695.1	CCP46504.1	ABL06283.1	ABM16210.1
CAM60508.1	AAS02710.1	ADU01352.1	ABL94100.1	CAC31823.1	ACC43576.1	SCY_orf06848_1	AMP23472.1	ABK69810.1	CDO85696.1	CCP46505.1	ABL06284.1	ABM16211.1
CAM60507.1	AAS02709.1	ADU01353.1	ABL94101.1	CAC31824.1	ACC43577.1	SCY_orf06849_1	AMP23473.1	ABK70790.1	CDO85697.1	CCP46506.1	ABL06285.1	ABM16212.1
CAM60506.1	AAS02708.1	ADU01354.1	ABL94102.1	CAC31825.1	ACC43578.1	SCY_orf06851_1	AMP23474.1	ABK73661.1	CDO85698.1	CCP46507.1	ABL06286.1	ABM16213.1
CAM60443.1	AAS02627.1	ADU01412.1	ABL94166.1	CAC31838.1	ACC43626.1	SCY_orf06908_1	AMP23512.1	ABK75210.1	CDO85754.1	CCP46534.1	ABL06312.1	ABM16269.1
CAM60442.1	AAS02628.1	ADU01413.1	ABL94167.1	CAC31839.1	ACC43627.1	SCY_orf06910_1	AMP23513.1	ABK73626.1	CDO85755.1	CCP46535.1	ABL06313.1	ABM16270.1
CAM60436.1	AAS02629.1	ADU01424.1	ABL94176.1	CAC31840.1	ACC43630.1	SCY_orf06913_1	AMP26122.1	ABK73014.1	CDO85756.1	CCP46536.1	ABL06315.1	ABM16281.1
CAM60422.1	AAS02632.1	ADU01427.1	ABL94180.1	CAC31843.1	ACC43635.1	SCY_orf06920_1	AMP23516.1	ABK71221.1	CDO85759.1	CCP46539.1	ABL06320.1	ABM16287.1
CAM60419.1	AAS02633.1	ADU01430.1	ABL94181.1	CAC31845.1	ACC43636.1	SCY_orf06923_1	AMP23517.1	ABK76091.1	CDO85761.1	CCP46541.1	ABL06321.1	ABM16293.1
CAM60418.1	AAS02634.1	ADU01431.1	ABL94182.1	CAC31846.1	ACC43637.1	SCY_orf06926_1	AMP23518.1	ABK70938.1	CDO85762.1	CCP46542.1	ABL06322.1	ABM16294.1
CAM60416.1	AAS02636.1	ADU01433.1	ABL94184.1	CAC31848.1	ACC43639.1	SCY_orf06928_1	AMP26125.1	ABK73280.1	CDO85766.1	CCP46544.1	ABL06324.1	ABM16296.1
CAM60410.1	AAS02637.1	ADU01434.1	ABL94185.1	CAC31849.1	ACC43640.1	SCY_orf06929_1	AMP23521.1	ABK74030.1	CDO85767.1	CCP46545.1	ABL06325.1	ABM16297.1
CAM60404.1	AAS02640.1	ADU01438.1	ABL94188.1	CAC31852.1	ACC43646.1	SCY_orf06933_1	AMP23523.1	ABK71113.1	CDO85770.1	CCP46548.1	ABL06330.1	ABM16301.1
CAM60368.1	AAS02596.1	ADU01502.1	ABL94237.1	CAC31991.1	ACC43699.1	SCY_orf07019_1	AMP23573.1	ABK70506.1	CDO85875.1	CCP46579.1	ABL06371.1	ABM16359.1
CAM60367.1	AAS02595.1	ADU01503.1	ABL94238.1	CAC31990.1	ACC43700.1	SCY_orf07021_1	AMP23574.1	ABK70497.1	CDO85876.1	CCP46580.1	ABL06372.1	ABM16360.1
CAM60164.1	AAS02565.1	ADU01648.1	ABL94461.1	CAC29627.1	ACC43734.1	SCY_orf07072_1	AMP23609.1	ABK72305.1	CDO85917.1	CCP46604.1	ABL06402.1	ABM16522.1
CAM60306.1	AAS02561.1	ADU01527.1	ABL94266.1	CAC29625.1	ACC43737.1	SCY_orf07078_1	AMP23613.1	ABK69778.1	CDO85920.1	CCP46607.1	ABL02862.1	ABM16381.1
CAM60304.1	AAS02559.1	ADU01528.1	ABL94267.1	CAC29623.1	ACC43739.1	SCY_orf07080_1	AMP26133.1	ABK74607.1	CDO85922.1	CCP46609.1	ABL02860.1	ABM16382.1
CAM60303.1	AAS02558.1	ADU01529.1	ABL94268.1	CAC29622.1	ACC43740.1	SCY_orf07081_1	AMP23615.1	ABK71692.1	CDO85923.1	CCP46610.1	ABL02859.1	ABM16383.1
CAM60302.1	AAS02557.1	ADU01530.1	ABL94269.1	CAC29621.1	ACC43741.1	SCY_orf07082_1	AMP23616.1	ABK69689.1	CDO85924.1	CCP46611.1	ABL02858.1	ABM16384.1
CAM60301.1	AAS02556.1	ADU01531.1	ABL94270.1	CAC29620.1	ACC43742.1	SCY_orf07084_1	AMP23617.1	ABK76192.1	CDO85925.1	CCP46612.1	ABL02857.1	ABM16385.1
CAM60292.1	AAS02552.1	ADU01539.1	ABL94277.1	CAC29617.1	ACC43756.1	SCY_orf07096_1	AMP23621.1	ABK72795.1	CDO85931.1	CCP46619.1	ABL06851.1	ABM16392.1
CAM60291.1	AAS02551.1	ADU01540.1	ABL94278.1	CAC29616.1	ACC43757.1	SCY_orf07097_1	AMP23622.1	ABK72059.1	CDO85932.1	CCP46620.1	ABL06852.1	ABM16393.1
CAM60281.1	AAS02538.1	ADU01547.1	ABL94286.1	CAC29610.1	ACC43767.1	SCY_orf07124_1	AMP23632.1	ABK73286.1	CDO85947.1	CCP46628.1	ABL06860.1	ABM16404.1
CAM60280.1	AAS02537.1	ADU01548.1	ABL94287.1	CAC29609.1	ACC43768.1	SCY_orf07127_1	AMP23633.1	ABK71774.1	CDO85948.1	CCP46629.1	ABL06861.1	ABM16405.1
CAM60273.1	AAS02531.1	ADU01555.1	ABL94294.1	CAC29603.1	ACC43774.1	SCY_orf07139_1	AMP26137.1	ABK74962.1	CDO85954.1	CCP46635.1	ABL06867.1	ABM16412.1
CAM60272.1	AAS02530.1	ADU01556.1	ABL94295.1	CAC29602.1	ACC43775.1	SCY_orf07141_1	AMP23638.1	ABK71187.1	CDO85955.1	CCP46636.1	ABL06868.1	ABM16413.1
CAM60271.1	AAS02529.1	ADU01557.1	ABL94296.1	CAC29601.1	ACC43776.1	SCY_orf07142_1	AMP23639.1	ABK72427.1	CDO85956.1	CCP46637.1	ABL06869.1	ABM16414.1
CAM60270.1	AAS02528.1	ADU01558.1	ABL94297.1	CAC29600.1	ACC43777.1	SCY_orf07144_1	AMP23640.1	ABK73148.1	CDO85957.1	CCP46638.1	ABL06870.1	ABM16415.1
CAM60267.1	AAS02525.1	ADU01562.1	ABL94300.1	CAC29597.1	ACC43780.1	SCY_orf07148_1	AMP23646.1	ABK70002.1	CDO85964.1	CCP46642.1	ABL06873.1	ABM16419.1
CAM60265.1	AAS02522.1	ADU01564.1	ABL94302.1	CAC29595.1	ACC43783.1	SCY_orf07151_1	AMP23649.1	ABK75275.1	CDO85967.1	CCP46645.1	ABL06876.1	ABM16421.1
CAM60253.1	AAS02514.1	ADU01567.1	ABL94306.1	CAC29590.1	ACC43790.1	SCY_orf07162_1	AMP23655.1	ABK71764.1	CDO85974.1	CCP46663.1	ABL06882.1	ABM16424.1
CAM60223.1	AAS02507.1	ADU01577.1	ABL94317.1	CAC29582.1	ACC43798.1	SCY_orf07171_1	AMP23663.1	ABK74211.1	CDO85983.1	CCP46671.1	ABL06890.1	ABM16432.1
CAM60217.1	AAS02503.1	ADU01583.1	ABL94322.1	CAC29579.1	ACC43802.1	SCY_orf07177_1	AMP23666.1	ABK71650.1	CDO85987.1	CCP46676.1	ABL06894.1	ABM16437.1
CAM60215.1	AAS02502.1	ADU01584.1	ABL94324.1	CAC29577.1	ACC43804.1	SCY_orf07179_1	AMP23667.1	ABK76128.1	CDO85989.1	CCP46678.1	ABL06896.1	ABM16438.1
CAM60207.1	AAS02498.1	ADU01593.1	ABL94333.1	CAC29574.1	ACC43808.1	SCY_orf07186_1	AMP23672.1	ABK71829.1	CDO85994.1	CCP46682.1	ABL06900.1	ABM16447.1
CAM60192.1	AAS02490.1	ADU01601.1	ABL94342.1	CAC29570.1	ACC43819.1	SCY_orf07204_1	AMP23680.1	ABK75608.1	CDO86002.1	CCP46687.1	ABL06910.1	ABM16462.1
CAM60191.1	AAS02489.1	ADU01602.1	ABL94343.1	CAC29569.1	ACC43820.1	SCY_orf07206_1	AMP23681.1	ABK70243.1	CDO86003.1	CCP46688.1	ABL06911.1	ABM16463.1
CAM65002.1	AAS06882.1	ADU01854.1	ABL94671.1	CAC32229.1	ACC43877.1	SCY_orf07275_1	AMP23693.1	ABK73691.1	CDO86049.1	CCP46736.1	ABL06923.1	ABM16813.1
CAM65003.1	AAS06884.1	ADU01855.1	ABL94672.1	CAC32230.1	ACC43878.1	SCY_orf07276_1	AMP23694.1	ABK75817.1	CDO86050.1	CCP46737.1	ABL06924.1	ABM16814.1
CAM65008.1	AAS06889.1	ADU01860.1	ABL94676.1	CAC32235.1	ACC43883.1	SCY_orf07285_1	AMP23697.1	ABK76153.1	CDO86055.1	CCP46742.1	ABL06929.1	ABM16819.1
CAM65010.1	AAS06891.1	ADU01862.1	ABL94678.1	CAC32236.1	ACC43885.1	SCY_orf07287_1	AMP23699.1	ABK72323.1	CDO86057.1	CCP46744.1	ABL06931.1	ABM16821.1
CAM65017.1	AAS06893.1	ADU01864.1	ABL89220.1	CAC32238.1	ACC43887.1	SCY_orf07289_1	AMP23701.1	ABK73674.1	CDO86059.1	CCP46746.1	ABL06933.1	ABM16823.1
CAM65018.1	AAS06894.1	ADU01865.1	ABL89221.1	CAC32239.1	ACC43888.1	SCY_orf07290_1	AMP26143.1	ABK74964.1	CDO86060.1	CCP46747.1	ABL06934.1	ABM16824.1
CAM65020.1	AAS06896.1	ADU01867.1	ABL89223.1	CAC32241.1	ACC43890.1	SCY_orf07292_1	AMP26144.1	ABK73535.1	CDO86062.1	CCP46749.1	ABL06936.1	ABM16826.1
CAM65021.1	AAS06897.1	ADU01868.1	ABL89224.1	CAC32242.1	ACC43891.1	SCY_orf07293_1	AMP23703.1	ABK74344.1	CDO86063.1	CCP46750.1	ABL06937.1	ABM16827.1
