# Supplementary material
Source: publisher figshare collection journal article supplement (https://tandf.figshare.com/articles/dataset/_/7936865)
Supplement: Supplementary file 1 [file 1 › temi_a_12040023_sm0016.xlsx]

## Sheet: Sheet1
Supplementary Table S9. Aligning with virulence genes of VFDB
Id	VFDB gene id	Identity	Coverage	VFDB gene gi	description
M. shigaense_orf00395_1	VFG2546	47.6	91.3	gi:53720396	wcbT - acyl-CoA transferase [Burkholderia pseudomallei K96243]
M. shigaense_orf04172_1	VFG1824	44.2	91.8	gi:15610269	devR - hypothetical protein Rv3133c [Mycobacterium tuberculosis H37Rv]
M. shigaense_orf06151_1	VFG1388	44.2	97.3	gi:15608039	ompA - ompA [Mycobacterium tuberculosis H37Rv]
M. shigaense_orf06152_1	VFG1388	42.5	89.1	gi:15608039	ompA - ompA [Mycobacterium tuberculosis H37Rv]
M. shigaense_orf01796_1	VFG1460	42.2	35.8	gi:24527992	y1094 - ORF B protein [Escherichia coli 536]
M. shigaense_orf01398_1	VFG1418	42.1	98.7	gi:15610899	lpqH - lpqH [Mycobacterium tuberculosis H37Rv]
M. shigaense_orf05423_1	VFG1824	41.9	28.6	gi:15610269	devR - hypothetical protein Rv3133c [Mycobacterium tuberculosis H37Rv]
M. shigaense_orf00012_1	VFG0169	39.6	98.4	gi:15599425	pchC - pyochelin biosynthetic protein PchC [Pseudomonas aeruginosa PAO1]
M. shigaense_orf03537_1	VFG1381	39.5	27.1	gi:15607608	icl/aceA - aceA [Mycobacterium tuberculosis H37Rv]
M. shigaense_orf03249_1	VFG0167	35.4	33.3	gi:15599423	pchR - transcriptional regulator PchR [Pseudomonas aeruginosa PAO1]
M. shigaense_orf03534_1	VFG1411	34.2	91.4	gi:15610124	leuD - leuD [Mycobacterium tuberculosis H37Rv]
M. shigaense_orf05363_1	VFG1813	33.3	92.8	gi:15610075	drrC - drrC [Mycobacterium tuberculosis H37Rv]
M. shigaense_orf03007_1	VFG1381	32.4	53.5	gi:15607608	icl/aceA - aceA [Mycobacterium tuberculosis H37Rv]
M. shigaense_orf03498_1	VFG2550	31.4	41.6	gi:53720400	wcbP - capsular polysaccharide biosynthesis dehydrogenase/reductase [Burkholderia pseudomallei K96243]
M. shigaense_orf04275_1	VFG2393	31.1	75.8	gi:57116988	PPE41 - PPE FAMILY PROTEIN [Mycobacterium tuberculosis H37Rv]
M. shigaense_orf02051_1	VFG1889	31.1	83.9	gi:52842852	letA - response regulator GacA [Legionella pneumophila Philadelphia 1]
M. shigaense_orf00396_1	VFG1407	30.7	86.3	gi:15610067	fadD26 - fadD26 [Mycobacterium tuberculosis H37Rv]
M. shigaense_orf04200_1	VFG1671	30.2	80.8	gi:28316251	orf48 - putative lysin/cadaverin transporter [Escherichia coli 536]
M. shigaense_orf03199_1	VFG2371	29.6	32.8	gi:123443289	wbcD - putative 6-deoxy-D-Gul transferase [Yersinia enterocolitica 8081]
M. shigaense_orf02050_1	VFG1825	29	43.6	gi:15610268	devS - hypothetical protein Rv3132c [Mycobacterium tuberculosis H37Rv]
M. shigaense_orf02734_1	VFG2387	28.9	26.5	gi:15610752	espA - CONSERVED HYPOTHETICAL ALANINE AND GLYCINE RICH PROTEIN [Mycobacterium tuberculosis H37Rv]
M. shigaense_orf02176_1	VFG1374	28.8	39	gi:15900287	cps4J - capsular polysaccharide biosynthesis protein Cps4J [Streptococcus pneumoniae TIGR4]
M. shigaense_orf06209_1	VFG0934	28.6	98	gi:26246575	entA - 2,3-dihydro-2,3-dihydroxybenzoate dehydrogenase [Escherichia coli CFT073]
M. shigaense_orf00093_1	VFG0168	28.5	93.1	gi:15599424	pchD - pyochelin biosynthesis protein PchD [Pseudomonas aeruginosa PAO1]
M. shigaense_orf04830_1	VFG1601	28.3	78.6	gi:23954284	orf67 - hypothetical protein [Escherichia coli 536]
M. shigaense_orf02095_1	VFG0344	27.6	56.1	gi:16272073	hitC - iron
M. shigaense_orf03205_1	VFG2375	27.6	87.4	gi:123443293	wbcA - putative epimerase [Yersinia enterocolitica 8081]
M. shigaense_orf02052_1	VFG1824	27.3	93.1	gi:15610269	devR - hypothetical protein Rv3133c [Mycobacterium tuberculosis H37Rv]
M. shigaense_orf00172_1	VFG1670	26.7	73.4	gi:28316250	orf47 - putative cadaverin decarboxylase [Escherichia coli 536]
M. shigaense_orf07201_1	VFG1721	26.5	85.5	gi:26249435	c3600 - Hypothetical protein [Escherichia coli CFT073]
M. shigaense_orf02475_1	VFG0930	26.4	89.5	gi:26246565	entF - Enterobactin synthetase component F [Escherichia coli CFT073]
M. shigaense_orf05061_1	VFG1654	26.4	41.2	gi:28316234	iroB - IroB protein [Escherichia coli 536]
M. shigaense_orf05989_1	VFG0584	26.2	51	gi:16767514	yjcC - putative diguanylate cyclase/phosphodiesterase [Salmonella enterica
M. shigaense_orf04270_1	VFG0155	25.8	91.3	gi:15598674	rhlB - rhamnosyltransferase chain B [Pseudomonas aeruginosa PAO1]
M. shigaense_orf03003_1	VFG0933	25.1	94.8	gi:26246574	entB - Isochorismatase [Escherichia coli CFT073]
M. shigaense_orf03198_1	VFG2374	23.3	93.2	gi:123443292	prt - paratose synthase [Yersinia enterocolitica 8081]
M. shigaense_orf00140_1	VFG1922	22.6	98.4	gi:15792655	ptmA - putative oxidoreductase
M. shigaense_orf01797_1	VFG1857	21.8	88.3	gi:52840983	iraAB - IraAB [Legionella pneumophila Philadelphia 1]
