# Supplementary material
Source: publisher figshare collection journal article supplement (https://tandf.figshare.com/articles/dataset/_/7936865)
Supplement: Supplementary file 1 [file 1 › temi_a_12040023_sm0017.xlsx]

## Sheet: Sheet1
Supplementary Table S10. Transcript informations of M. shigaense
Id	RPKM	Similarity	Query coverage	Alignment length	Query length	Genome start	Genome end	Genome strand	Number of hit
M. shigaense_denovo_2490	99	100.000|100.000|100.000|91.624|95.862|98.855|98.855|98.092|95.385|90.909|90.909	1.0|1.0|1.0|1.00688468158|0.499139414802|0.450946643718|0.450946643718|0.450946643718|0.111876075731|0.113597246127|0.113597246127	581|581|581|585|290|262|262|262|65|66|66	581|581|581|581|581|581|581|581|581|581|581	917285|932660|935894|1759492|923948|920793|928458|1763012|923702|920519|928184	917865|933240|936474|1760072|924237|921054|928719|1763273|923766|920583|928248	+|+|+|+|+|+|+|+|+|+|+	11
M. shigaense_denovo_1399	262	100.000|99.736|99.561|99.823|99.911|99.911|99.823|99.822|99.734|100.000|96.970	0.883752549286|0.773623385452|0.774983004759|0.768184908226|0.766145479266|0.766145479266|0.767505098572|0.764785859959|0.766145479266|0.134602311353|0.0224337185588	1300|1138|1140|1130|1127|1127|1129|1125|1127|198|33	1471|1471|1471|1471|1471|1471|1471|1471|1471|1471|1471	774667|3701829|267348|1548902|3439961|4164631|3585992|103584|1846002|775771|3702934	775966|3702966|268487|1550031|3441087|4165757|3587120|104708|1847128|775968|3702966	-|+|+|+|-|+|-|+|+|+|-	11
M. shigaense_denovo_571	90	99.358|86.878|99.341|99.284|97.140|98.440|98.440|94.962|94.545|94.545|94.545	0.864539990754|1.00416088766|0.490984743412|0.452149791956|0.452612112806|0.355524734166|0.355524734166|0.302820157189|0.0508552935737|0.0508552935737|0.0508552935737	1870|2172|1062|978|979|769|769|655|110|110|110	2163|2163|2163|2163|2163|2163|2163|2163|2163|2163|2163	936185|1762691|920472|928137|923655|917576|932951|1759814|917241|932616|935850	938054|1764853|921533|929114|924632|918344|933719|1760468|917349|932724|935958	-|-|-|-|-|-|-|-|-|-|-	11
M. shigaense_denovo_1617	191	99.912|99.910|99.556|99.910|99.910|99.910|99.820|99.820|99.730	1.0|0.980650835532|0.98944591029|0.977132805629|0.977132805629|0.977132805629|0.977132805629|0.977132805629|0.977132805629	1137|1115|1125|1111|1111|1111|1111|1111|1111	1137|1137|1137|1137|1137|1137|1137|1137|1137	103562|774684|1548893|3439976|3701833|4164632|267356|3586009|1846003	104698|775798|1550016|3441086|3702943|4165742|268466|3587119|1847113	-|+|-|+|-|-|-|+|-	9
M. shigaense_denovo_2488	117	100.000|100.000|100.000|100.000|100.000|100.000|90.843|91.579	1.0|1.0|1.0|1.0|0.906698564593|0.906698564593|0.992822966507|0.909090909091	418|418|418|418|379|379|415|380	418|418|418|418|418|418|418|418	917882|921071|933257|936491|924254|928736|1763290|1760089	918299|921488|933674|936908|924632|929114|1763701|1760468	+|+|+|+|+|+|+|+	8
M. shigaense_denovo_2489	133	100.000|99.947|98.885|82.275|99.437|100.000|96.542	1.0|0.997899159664|0.989495798319|0.909663865546|0.372899159664|0.334033613445|0.364495798319	1904|1900|1884|1732|710|636|694	1904|1904|1904|1904|1904|1904|1904	933847|921661|918472|1760685|931810|916506|927328	935750|923560|920352|1762393|932518|917141|928017	+|+|+|+|+|+|+	7
M. shigaense_denovo_1669	52	100.000|100.000|85.915|83.491|83.491|85.405|85.405	1.0|0.995348837209|0.990697674419|0.986046511628|0.986046511628|0.860465116279|0.860465116279	215|214|213|212|212|185|185	215|215|215|215|215|215|215	2304942|2286418|2295407|1047128|1051577|2290929|2309459	2305156|2286631|2295618|1047338|1051787|2291113|2309643	+|+|+|-|-|+|+	7
M. shigaense_denovo_3671	94	100.000|89.035|71.528|72.123|70.020|70.020|100.000	1.0|0.258503401361|0.489795918367|0.443310657596|0.563492063492|0.563492063492|0.031746031746	882|228|432|391|497|497|28	882|882|882|882|882|882|882	2293955|2312791|3711918|3708778|919882|927547|1048746	2294836|2313017|3712338|3709155|920366|928031|1048773	+|+|-|-|+|+|-	7
M. shigaense_denovo_1417	45	100.000|95.283|83.596|81.761|81.761|83.408|83.408	1.0|0.996865203762|0.993730407524|0.996865203762|0.996865203762|0.699059561129|0.699059561129	319|318|317|318|318|223|223	319|319|319|319|319|319|319	2304933|2286409|2295397|2290918|2309448|1047128|1051577	2305251|2286726|2295712|2291235|2309765|1047349|1051798	-|-|-|-|-|+|+	7
M. shigaense_denovo_3347	122	100.000|100.000|97.835|99.569|100.000|96.542	1.0|1.0|0.997942386831|0.716049382716|0.635802469136|0.713991769547	972|972|970|696|618|694	972|972|972|972|972|972	922575|934761|919386|931810|916506|927328	923546|935732|920352|932504|917123|928017	-|-|-|-|-|-	6
M. shigaense_denovo_1415	154	100.000|100.000|77.263|76.939|75.537|100.000	1.0|1.0|0.999491611591|1.00965937977|1.01830198271|0.140315200813	1967|1967|1966|1986|2003|276	1967|1967|1967|1967|1967|1967	2291954|2310484|2287455|2305976|2296439|2312481	2293920|2312450|2289406|2307936|2298407|2312756	-|-|-|-|-|-	6
M. shigaense_denovo_4975	74	100.000|71.528|72.123|70.020|70.020	1.0|0.742268041237|0.671821305842|0.853951890034|0.853951890034	582|432|391|497|497	582|582|582|582|582	2294240|3711918|3708778|919882|927547	2294821|3712338|3709155|920366|928031	-|+|+|-|-	5
M. shigaense_denovo_1672	88	99.569|95.635|73.481|73.892	1.00043084877|1.00689358035|0.737613097803|0.0874623007324	2322|2337|1712|203	2321|2321|2321|2321	2288664|2307185|2297750|2295248	2290984|2309514|2299440|2295447	+|+|+|+	4
M. shigaense_denovo_1670	164	100.000|100.000|79.149|77.890	1.0|1.0|1.01118760757|1.01979345955	1162|1162|1175|1185	1162|1162|1162|1162	2291621|2310151|2287109|2305630	2292782|2311312|2288275|2306801	+|+|+|+	4
M. shigaense_denovo_3670	158	100.000|100.000|100.000|74.715	1.0|1.0|0.262857142857|1.0019047619	1050|1050|276|1052	1050|1050|1050|1050	2292871|2311401|2312481|2297377	2293920|2312450|2312756|2298407	+|+|+|+	4
M. shigaense_denovo_2830	58	99.967|99.917|99.917|99.833	1.0|0.395264715554|0.394935876356|0.394935876356	3041|1202|1201|1201	3041|3041|3041|3041	3319138|2971621|4679690|3031383	3322178|2972822|4680890|3032583	+|+|+|-	4
M. shigaense_denovo_576	157	99.961|91.798|91.489|91.489	1.0|0.222957198444|0.00609597924773|0.00609597924773	7710|1719|47|47	7710|7710|7710|7710	942324|2499010|3605141|3605198	950030|2500721|3605187|3605244	+|+|-|-	4
M. shigaense_denovo_2281	43	100.000|99.012|83.033|82.824	1.0|0.132007822686|0.126792698827|0.0853976531943	3068|405|389|262	3068|3068|3068|3068	3679718|3361782|1559848|225042	3682785|3362186|1560233|225302	+|-|+|+	4
M. shigaense_denovo_1665	89	100.000|74.650|73.288|77.487	1.0|0.561408614668|0.59924330617|0.0555878928987	3436|1929|2059|191	3436|3436|3436|3436	2279672|3691996|687761|2917553	2283107|3693910|689780|2917738	+|-|+|-	4
M. shigaense_denovo_1628	93	100.000|74.650|73.288|77.487	1.0|0.562062937063|0.599941724942|0.0556526806527	3432|1929|2059|191	3432|3432|3432|3432	2279673|3691996|687761|2917553	2283104|3693910|689780|2917738	-|+|-|+	4
M. shigaense_denovo_3041	78	99.940|99.917|99.917|99.833	1.0|0.721055788842|0.720455908818|0.720455908818	1667|1202|1201|1201	1667|1667|1667|1667	2971156|3320977|4679690|3031383	2972822|3322178|4680890|3032583	-|-|-|+	4
M. shigaense_denovo_4399	141	100.000|100.000|78.328|77.658	1.0|1.0|1.01791713326|0.62150055991	893|893|909|555	893|893|893|893	2291038|2309568|2305058|2559677	2291930|2310460|2305951|2560221	-|-|-|-	4
M. shigaense_denovo_4146	50	100.000|100.000|100.000|86.590	1.0|1.0|1.0|1.00772200772	259|259|259|261	259|259|259|259	917349|932724|935958|1759556	917607|932982|936216|1759813	-|-|-|-	4
M. shigaense_denovo_1380	113	99.633|100.000|94.479|98.305	0.982699602183|0.12961421038|0.0603201036174|0.00545841428439	10622|1401|652|59	10809|10809|10809|10809	2698460|2695198|4224573|2698370	2709080|2696598|4225219|2698428	-|-|-|-	4
M. shigaense_denovo_573	132	100.000|100.000|100.000|85.950	1.0|1.0|1.0|1.0119474313	837|837|837|847	837|837|837|837	918408|921597|933783|1760621	919244|922433|934619|1761458	-|-|-|-	4
M. shigaense_denovo_4028	78	100.000|77.887|100.000	1.0|0.172677131947|0.00410125866214	7071|1221|29	7071|7071|7071	3443935|3808154|3381859	3451005|3809351|3381887	+|+|+	3
M. shigaense_denovo_4460	52	100.000|98.780|98.524	1.0|0.254263565891|0.21007751938	1290|328|271	1290|1290|1290	1668986|1668632|1668335	1670275|1668959|1668605	+|+|+	3
M. shigaense_denovo_1614	51	99.936|96.641|99.278	1.0|0.741379310345|0.176883780332	1566|1161|277	1566|1566|1566	2694980|2698460|2698152	2696545|2699619|2698428	+|+|+	3
M. shigaense_denovo_729	64	100.000|93.056|90.000	1.0|0.137142857143|0.133333333333	525|72|70	525|525|525	4393763|3689532|3690891	4394287|3689603|3690960	+|+|+	3
M. shigaense_denovo_6943	38	100.000|91.960|89.500	1.0|0.970731707317|0.975609756098	205|199|200	205|205|205	2422582|1114169|1111653	2422786|1114366|1111850	+|+|+	3
M. shigaense_denovo_3346	138	100.000|100.000|77.658	1.0|1.0|0.934343434343	594|594|555	594|594|594	2291036|2309566|2559677	2291629|2310159|2560221	+|+|+	3
M. shigaense_denovo_1987	70	98.554|93.612|76.714	0.962088016765|0.60240045723|0.202895789674	5050|3162|1065	5249|5249|5249	2464830|2473297|2471210	2469873|2476446|2472256	+|+|+	3
M. shigaense_denovo_5025	63	100.000|100.000|80.902	0.524697259401|0.448852772467|0.395474824729	3293|2817|2482	6276|6276|6276	508082|505075|2492498	511374|507891|2494941	+|+|+	3
M. shigaense_denovo_4825	100	100.000|72.938|81.720	1.0|0.254092992796|0.0609037328094	1527|388|93	1527|1527|1527	135719|623373|763673	137245|623740|763765	+|+|+	3
M. shigaense_denovo_1196	153	100.000|76.145|76.900	1.0|0.465630487091|0.17539181895	15377|7160|2697	15377|15377|15377	352431|2999381|3006492	367807|3006401|3009171	+|+|+	3
M. shigaense_denovo_647	244	100.000|99.908|99.908	1.0|0.203978232314|0.203790579846	5329|1087|1086	5329|5329|5329	1325363|4956266|821138	1330691|4957352|822223	+|+|-	3
M. shigaense_denovo_1208	102	100.000|75.122|76.201	1.0|0.117299256151|0.0873545679954	5243|615|458	5243|5243|5243	2223926|1167040|1168429	2229168|1167645|1168868	+|+|-	3
M. shigaense_denovo_6412	41	100.000|77.627|78.571	1.0|0.945512820513|0.224358974359	624|590|140	624|624|624	3066849|2470983|1703331	3067472|2471564|1703468	+|-|+	3
M. shigaense_denovo_4183	72	100.000|69.838|82.812	1.0|0.358302411874|0.0296846011132	4312|1545|128	4312|4312|4312	1439582|3602676|3310638	1443893|3604190|3310765	+|-|+	3
M. shigaense_denovo_368	499	100.000|80.258|77.059	1.0|0.191297208539|0.139573070608	3654|699|510	3654|3654|3654	4824953|592658|593820	4828606|593353|594326	+|-|-	3
M. shigaense_denovo_702	295	100.000|80.258|77.059	1.0|0.0789117182208|0.05757507338	8858|699|510	8858|8858|8858	4821060|592658|593820	4829917|593353|594326	-|+|+	3
M. shigaense_denovo_5044	66	100.000|99.588|84.749	1.0|0.695278969957|0.656652360515	699|486|459	699|699|699	3362579|3678840|1847654	3363277|3679325|1848111	-|+|+	3
M. shigaense_denovo_2730	166	99.956|91.489|91.489	1.0|0.00684432794525|0.00684432794525	6867|47|47	6867|6867|6867	941317|3605141|3605198	948180|3605187|3605244	-|+|+	3
M. shigaense_denovo_5356	75	99.851|99.557|82.237	0.994091580502|1.0|0.898079763663	673|677|608	677|677|677	3678840|3362392|1847654	3679512|3363068|1848257	-|+|-	3
M. shigaense_denovo_3186	59	100.000|70.073|82.812	1.0|0.587142857143|0.0609523809524	2100|1233|128	2100|2100|2100	1439578|3602982|3310638	1441677|3604190|3310765	-|+|-	3
M. shigaense_denovo_661	404	100.000|99.908|99.908	1.0|0.355577363428|0.355250245339	3057|1087|1086	3057|3057|3057	1327491|4956266|821138	1330547|4957352|822223	-|-|+	3
M. shigaense_denovo_517	30	100.000|95.890|90.196	1.0|0.386243386243|0.269841269841	189|73|51	189|189|189	445452|3954371|1282291	445640|3954443|1282340	-|-|+	3
M. shigaense_denovo_1233	148	100.000|76.145|76.900	1.0|0.439398588524|0.165510892912	16295|7160|2697	16295|16295|16295	350955|2999381|3006492	367249|3006401|3009171	-|-|-	3
M. shigaense_denovo_5142	54	100.000|83.162|78.000	1.0|0.813021702838|1.00166944908	599|487|600	599|599|599	1113416|1111011|2421827	1114014|1111490|2422419	-|-|-	3
M. shigaense_denovo_4190	108	100.000|98.152|73.913	1.0|1.00272479564|0.125340599455	1835|1840|230	1835|1835|1835	2289161|2307691|2295248	2290995|2309525|2295473	-|-|-	3
M. shigaense_denovo_3623	116	100.000|77.887|100.000	1.0|0.750460971112|0.0178242163491	1627|1221|29	1627|1627|1627	3444995|3808154|3381859	3446621|3809351|3381887	-|-|-	3
M. shigaense_denovo_3726	89	100.000|88.406|77.358	1.0|0.0508849557522|0.0781710914454	1356|69|106	1356|1356|1356	968628|969957|967998	969983|970025|968100	-|-|-	3
M. shigaense_denovo_4660	45	100.000|100.000|100.000	1.0|1.0|0.748898678414	227|227|170	227|227|227	1668632|1668986|1668335	1668858|1669212|1668504	-|-|-	3
M. shigaense_denovo_758	64	100.000|93.421|90.541	1.0|0.110465116279|0.107558139535	688|76|74	688|688|688	4393759|3689528|3690887	4394446|3689603|3690960	-|-|-	3
M. shigaense_denovo_3801	91	100.000|85.414	1.0|0.284941040015	5173|1474	5173|5173	3253707|1463065	3258879|1464529	+|+	2
M. shigaense_denovo_4290	54	99.968|100.000	0.9843550447|0.014687100894	3083|46	3132|3132	563615|566723	566697|566768	+|+	2
M. shigaense_denovo_6880	59	100.000|84.146	1.0|0.136666666667	600|82	600|600	1488347|4290140	1488946|4290221	+|+	2
M. shigaense_denovo_2973	61	100.000|99.908	1.0|0.768033946252	1414|1086	1414|1414	1796782|2546926	1798195|2548011	+|+	2
M. shigaense_denovo_2569	61	100.000|80.995	1.0|0.161372763782	2739|442	2739|2739	1710100|1707833	1712838|1708270	+|+	2
M. shigaense_denovo_4491	137	100.000|73.154	1.0|0.92669924478	2251|2086	2251|2251	2313025|4078701	2315275|4080755	+|+	2
M. shigaense_denovo_8530	47	100.000|98.512	1.0|0.694603903559	871|605	871|871	3710534|3707647	3711404|3708251	+|+	2
M. shigaense_denovo_5908	39	99.623|99.623	0.981481481481|0.981481481481	265|265	270|270	926980|931462	927244|931726	+|+	2
M. shigaense_denovo_5907	80	99.821|99.821	1.0|1.0	2234|2234	2234|2234	924711|929193	926944|931426	+|+	2
M. shigaense_denovo_3831	30	100.000|91.667	1.0|1.0	72|72	72|72	1128767|1126815	1128838|1126886	+|+	2
M. shigaense_denovo_2424	144	100.000|79.661	1.0|0.289837273565	3257|944	3257|3257	4598443|2538423	4601699|2539355	+|+	2
M. shigaense_denovo_6489	53	100.000|98.000	1.0|0.0273074822501	1831|50	1831|1831	1428737|3745365	1430567|3745414	+|+	2
M. shigaense_denovo_2273	76	100.000|85.746	1.0|0.597986577181	1490|891	1490|1490	1554758|4189972	1556247|4190855	+|+	2
M. shigaense_denovo_601	36	100.000|74.946	1.0|0.976793248945	474|463	474|474	728909|2189668	729382|2190122	+|+	2
M. shigaense_denovo_4895	59	100.000|100.000	1.0|0.273364485981	1284|351	1284|1284	2029031|3047914	2030314|3048264	+|+	2
M. shigaense_denovo_5553	78	100.000|72.991	1.0|0.263039568345	2224|585	2224|2224	4108124|2861307	4110347|2861881	+|+	2
M. shigaense_denovo_5578	40	99.969|100.000	0.988833746898|0.0201612903226	3188|65	3224|3224	3946473|3949667	3949660|3949731	+|+	2
M. shigaense_denovo_1668	58	100.000|83.908	1.0|0.925531914894	282|261	282|282	2304514|2286013	2304795|2286271	+|+	2
M. shigaense_denovo_7304	56	100.000|97.143	1.0|0.0181441161223	1929|35	1929|1929	1764116|4650095	1766044|4650129	+|+	2
M. shigaense_denovo_6410	48	100.000|74.240	1.0|0.349008759797	2169|757	2169|2169	3069416|3063284	3071584|3064025	+|+	2
M. shigaense_denovo_5809	88	100.000|94.872	1.0|0.0438202247191	890|39	890|890	2902330|2905475	2903219|2905512	+|+	2
M. shigaense_denovo_7406	30	100.000|80.000	1.0|0.886363636364	220|195	220|220	1154715|1153986	1154934|1154178	+|+	2
M. shigaense_denovo_5312	79	99.977|100.000	0.934921310081|0.0493407060825	4396|232	4702|4702	4846083|4850574	4850477|4850805	+|+	2
M. shigaense_denovo_4852	66	100.000|84.300	1.0|0.120328542094	2435|293	2435|2435	2810160|4761386	2812594|4761676	+|+	2
M. shigaense_denovo_2869	103	100.000|100.000	1.0|0.00774568339519	6197|48	6197|6197	3995977|4002180	4002173|4002227	+|+	2
M. shigaense_denovo_1108	150	100.000|100.000	0.867052023121|0.132947976879	1500|230	1730|1730	1|5207654	1500|5207883	+|+	2
M. shigaense_denovo_555	280	100.000|73.658	1.0|0.553941908714	1446|801	1446|1446	2807449|268673	2808894|269447	+|+	2
M. shigaense_denovo_5416	31	100.000|100.000	1.0|1.0	107|107	107|107	1047040|1051489	1047146|1051595	+|+	2
M. shigaense_denovo_2283	80	100.000|74.940	1.0|0.0773387998509	5366|415	5366|5366	3683981|2175285	3689346|2175691	+|+	2
M. shigaense_denovo_1505	105	100.000|73.160	1.0|0.177996177996	3663|652	3663|3663	245022|3399332	248684|3399967	+|+	2
M. shigaense_denovo_2570	52	100.000|81.718	1.0|0.633748055988	1286|815	1286|1286	1708438|1713003	1709723|1713814	+|+	2
M. shigaense_denovo_1042	346	91.828|87.334	0.977183600713|0.591087344029	2741|1658	2805|2805	1058555|676195	1061286|677828	+|+	2
M. shigaense_denovo_1584	55	100.000|79.630	1.0|0.192	1125|216	1125|1125	1115162|2423722	1116286|2423937	+|+	2
M. shigaense_denovo_1615	137	100.000|94.479	1.0|0.0635663449352	10257|652	10257|10257	2699723|4224573	2709979|4225219	+|+	2
M. shigaense_denovo_1636	52	100.000|80.781	1.0|0.314596126594	2117|666	2117|2117	4616939|3259198	4619055|3259850	+|+	2
M. shigaense_denovo_1563	101	100.000|99.605	0.684499314129|0.277640603567	2495|1012	3645|3645	5114603|5113421	5117097|5114432	+|+	2
M. shigaense_denovo_580	90	100.000|90.783	1.0|0.110940695297	1956|217	1956|1956	443468|3954126	445423|3954342	+|+	2
M. shigaense_denovo_632	37	100.000|100.000	0.934379457917|0.0513552068474	655|36	701|701	1315991|1316674	1316645|1316709	+|+	2
M. shigaense_denovo_1185	289	100.000|100.000	1.0|0.021164021164	4725|100	4725|4725	4017210|4016991	4021934|4017090	+|+	2
M. shigaense_denovo_1889	220	100.000|73.290	1.0|0.0595885093168	5152|307	5152|5152	4465053|4773436	4470204|4773733	+|+	2
M. shigaense_denovo_5770	35	100.000|100.000	0.556939501779|0.480427046263	313|270	562|562	5175485|5175817	5175797|5176086	+|+	2
M. shigaense_denovo_1671	34	100.000|95.902	1.0|0.884057971014	138|122	138|138	2306956|2288435	2307093|2288556	+|+	2
M. shigaense_denovo_4325	32	100.000|92.308	1.0|0.614173228346	127|78	127|127	2305712|2287191	2305838|2287268	+|+	2
M. shigaense_denovo_875	203	100.000|81.757	1.0|0.0269286754003	5496|148	5496|5496	1303616|3990494	1309111|3990639	+|+	2
M. shigaense_denovo_1700	91	100.000|74.640	1.0|0.265900383142	1305|347	1305|1305	978246|1218423	979550|1218762	+|+	2
M. shigaense_denovo_992	46	100.000|85.806	1.0|0.235026535254	1319|310	1319|1319	2692988|2697169	2694306|2697478	+|+	2
M. shigaense_denovo_1667	180	99.958|95.541	1.0|0.959339263024	2361|2265	2361|2361	2283512|2302092	2285872|2304350	+|+	2
M. shigaense_denovo_6684	39	100.000|100.000	1.0|0.995614035088	228|227	228|228	2028480|3047363	2028707|3047589	+|+	2
M. shigaense_denovo_7430	53	100.000|75.638	1.0|1.01161103048	3445|3485	3445|3445	501397|2488838	504841|2492261	+|+	2
M. shigaense_denovo_6006	61	100.000|99.399	1.0|0.671370967742	992|666	992|992	1761619|1758699	1762610|1759364	+|+	2
M. shigaense_denovo_717	137	100.000|79.720	1.0|0.0229829636773	6222|143	6222|6222	3113162|3119383	3119383|3119524	+|+	2
M. shigaense_denovo_5423	42	100.000|100.000	1.0|0.0623885918004	561|35	561|561	3293103|688453	3293663|688487	+|+	2
M. shigaense_denovo_283	61	100.000|100.000	1.0|0.0119952019192	2501|30	2501|2501	2329931|1181503	2332431|1181532	+|+	2
M. shigaense_denovo_2722	145	100.000|100.000	1.0|0.0101892285298	2748|28	2748|2748	2479797|2622435	2482544|2622462	+|+	2
M. shigaense_denovo_4764	35	100.000|97.872	1.0|0.242268041237	194|47	194|194	1295151|5080157	1295344|5080203	+|+	2
M. shigaense_denovo_6727	51	100.000|100.000	1.0|1.0	882|882	882|882	1047373|1051822	1048254|1052703	+|+	2
M. shigaense_denovo_3122	99	100.000|75.244	1.0|0.224081484176	5498|1232	5498|5498	2242330|2256888	2247827|2258115	+|-	2
M. shigaense_denovo_893	203	100.000|76.978	1.0|0.286326530612	4900|1403	4900|4900	152455|809958	157354|811346	+|-	2
M. shigaense_denovo_931	93	99.959|94.940	1.0|0.169595422967	2447|415	2447|2447	3331955|1089320	3334401|1089734	+|-	2
M. shigaense_denovo_3417	95	100.000|75.538	1.0|0.0317785750897	11706|372	11706|11706	312730|968463	324435|968832	+|-	2
M. shigaense_denovo_2789	86	100.000|80.144	1.0|0.405169275573	2747|1113	2747|2747	4745073|822247	4747819|823345	+|-	2
M. shigaense_denovo_4078	85	100.000|75.586	1.0|0.0506228989519	10114|512	10114|10114	2269440|3603687	2279553|3604191	+|-	2
M. shigaense_denovo_2957	80	100.000|76.613	1.0|0.679452054795	365|248	365|365	1778016|1368402	1778380|1368638	+|-	2
M. shigaense_denovo_5554	63	100.000|78.992	1.0|0.153945666235	3865|595	3865|3865	4110401|1484913	4114265|1485483	+|-	2
M. shigaense_denovo_7119	46	100.000|72.961	1.0|0.208781362007	1116|233	1116|1116	3921176|2572836	3922291|2573061	+|-	2
M. shigaense_denovo_5869	74	100.000|100.000	1.0|0.011909650924	2435|29	2435|2435	604054|4737663	606488|4737691	+|-	2
M. shigaense_denovo_3855	156	100.000|81.402	1.0|0.574363188168	1217|699	1217|1217	3330597|1089878	3331813|1090571	+|-	2
M. shigaense_denovo_7387	44	100.000|100.000	1.0|1.0	252|252	252|252	3361956|3679697	3362207|3679948	+|-	2
M. shigaense_denovo_4750	56	100.000|84.158	1.0|0.13277826468	2282|303	2282|2282	4503216|4981304	4505497|4981605	+|-	2
M. shigaense_denovo_1206	179	100.000|97.368	1.0|0.00534684114254	7107|38	7107|7107	2216429|3677401	2223535|3677438	+|-	2
M. shigaense_denovo_7246	34	100.000|72.340	1.0|1.00304878049	328|329	328|328	1146871|1602363	1147198|1602686	+|-	2
M. shigaense_denovo_2208	59	100.000|73.618	1.0|0.132843791722	2996|398	2996|2996	858125|1295279	861120|1295667	+|-	2
M. shigaense_denovo_6342	61	100.000|99.065	1.0|0.117517847337	1821|214	1821|1821	2882420|3356268	2884240|3356481	+|-	2
M. shigaense_denovo_613	89	100.000|74.194	1.0|0.0486198243413	6376|310	6376|6376	737359|1295391	743734|1295692	+|-	2
M. shigaense_denovo_1655	41	100.000|72.381	1.0|0.23178807947	906|210	906|906	2556589|3718097	2557494|3718305	+|-	2
M. shigaense_denovo_2639	151	100.000|74.912	1.0|0.163503929461	5217|853	5217|5217	706804|1295284	712020|1296117	+|-	2
M. shigaense_denovo_833	86	100.000|74.615	1.0|0.0510003923107	2549|130	2549|2549	4202140|4773391	4204688|4773517	+|-	2
M. shigaense_denovo_3695	102	100.000|81.090	1.0|0.144084437899	4074|587	4074|4074	81499|1604576	85572|1605159	+|-	2
M. shigaense_denovo_6252	77	100.000|100.000	1.0|0.0113904163394	2546|29	2546|2546	1478958|3452542	1481503|3452570	+|-	2
M. shigaense_denovo_7864	51	100.000|75.725	1.0|0.296774193548	930|276	930|930	4144487|2649602	4145416|2649876	+|-	2
M. shigaense_denovo_877	152	99.813|76.651	1.00140699747|0.122127380171	10676|1302	10661|10661	882529|1150479	893204|1151764	+|-	2
M. shigaense_denovo_1971	36	100.000|100.000	1.0|0.0607966457023	477|29	477|477	173374|4530570	173850|4530598	+|-	2
M. shigaense_denovo_5582	69	100.000|71.878	1.0|0.148510514019	6848|1017	6848|6848	4073032|1687913	4079879|1688893	+|-	2
M. shigaense_denovo_1912	188	100.000|87.607	1.0|0.276988636364	4224|1170	4224|4224	4789327|818572	4793550|819735	+|-	2
M. shigaense_denovo_910	94	100.000|75.538	1.0|0.0311766677841	11932|372	11932|11932	312567|968463	324498|968832	-|+	2
M. shigaense_denovo_1212	171	100.000|97.368	1.0|0.00537482319661	7070|38	7070|7070	2216420|3677401	2223489|3677438	-|+	2
M. shigaense_denovo_1210	110	100.000|74.930	1.0|0.0694444444444	5112|355	5112|5112	2223920|1168526	2229031|1168868	-|+	2
M. shigaense_denovo_249	63	100.000|78.992	1.0|0.152057245081	3913|595	3913|3913	4110405|1484913	4114317|1485483	-|+	2
M. shigaense_denovo_790	313	100.000|74.615	1.0|0.036775106082	3535|130	3535|3535	4202149|4773391	4205683|4773517	-|+	2
M. shigaense_denovo_2956	54	100.000|76.613	1.0|0.708571428571	350|248	350|350	1778017|1368402	1778366|1368638	-|+	2
M. shigaense_denovo_2044	83	100.000|73.618	1.0|0.508301404853	783|398	783|783	858127|1295279	858909|1295667	-|+	2
M. shigaense_denovo_2069	62	100.000|99.065	1.0|0.260024301337	823|214	823|823	2882241|3356268	2883063|3356481	-|+	2
M. shigaense_denovo_387	494	100.000|81.046	1.0|0.0734165067179	2084|153	2084|2084	1977480|1977733	1979563|1977884	-|+	2
M. shigaense_denovo_1490	42	100.000|72.381	1.0|0.2416570771	869|210	869|869	2556587|3718097	2557455|3718305	-|+	2
M. shigaense_denovo_5393	30	100.000|94.624	1.0|0.830357142857	112|93	112|112	2563294|92360	2563405|92452	-|+	2
M. shigaense_denovo_826	158	99.802|76.651	1.00149090548|0.129410595368	10076|1302	10061|10061	882521|1150479	892596|1151764	-|+	2
M. shigaense_denovo_3728	86	100.000|75.586	1.0|0.0667971298108	7665|512	7665|7665	2269414|3603687	2277078|3604191	-|+	2
M. shigaense_denovo_3976	92	100.000|80.144	1.0|0.479948253558	2319|1113	2319|2319	4745043|822247	4747361|823345	-|+	2
M. shigaense_denovo_869	97	100.000|77.890	1.0|0.0743926361853	6627|493	6627|6627	710381|1295284	717007|1295772	-|+	2
M. shigaense_denovo_438	113	100.000|87.607	1.0|0.118445029358	9878|1170	9878|9878	4789231|818572	4799108|819735	-|+	2
M. shigaense_denovo_6693	56	100.000|83.117	1.0|0.11213592233	2060|231	2060|2060	4503305|4981304	4505364|4981533	-|+	2
M. shigaense_denovo_1344	62	100.000|77.315	1.0|0.341501976285	1265|432	1265|1265	2127588|106247	2128852|106676	-|+	2
M. shigaense_denovo_1103	241	100.000|76.978	1.0|0.37303908535	3761|1403	3761|3761	153634|809958	157394|811346	-|+	2
M. shigaense_denovo_1739	57	100.000|100.000	1.0|0.00658791458428	4402|29	4402|4402	602116|4737663	606517|4737691	-|+	2
M. shigaense_denovo_570	263	100.000|94.444	1.0|0.0119086999669	3023|36	3023|3023	938059|940326	941081|940360	-|+	2
M. shigaense_denovo_5169	30	100.000|88.060	1.0|0.943661971831	71|67	71|71	3928928|1461689	3928998|1461755	-|+	2
M. shigaense_denovo_1829	190	100.000|81.346	1.0|0.176703841388	4035|713	4035|4035	3327791|1089864	3331825|1090571	-|+	2
M. shigaense_denovo_4264	40	100.000|79.012	1.0|0.708454810496	343|243	343|343	1461476|3928869	1461818|3929109	-|+	2
M. shigaense_denovo_3155	76	100.000|100.000	1.0|0.0104806649801	2767|29	2767|2767	1478754|3452542	1481520|3452570	-|+	2
M. shigaense_denovo_7719	33	100.000|80.508	1.0|0.751592356688	157|118	157|157	81953|1604870	82109|1604986	-|+	2
M. shigaense_denovo_6469	79	100.000|81.799	1.0|0.359668924003	1329|478	1329|1329	4191817|4507737	4193145|4508213	-|+	2
M. shigaense_denovo_5993	44	100.000|86.667	1.0|0.208333333333	360|75	360|360	2229163|1168312	2229522|1168386	-|+	2
M. shigaense_denovo_7591	36	100.000|71.989	1.0|0.934554973822	382|357	382|382	3922031|2572714	3922412|2573061	-|+	2
M. shigaense_denovo_2340	97	100.000|97.674	1.0|0.0152861713473	2813|43	2813|2813	1610410|784317	1613222|784359	-|+	2
M. shigaense_denovo_4324	102	99.956|95.522	1.0|0.20706401766	2265|469	2265|2265	3331901|1089320	3334165|1089788	-|+	2
M. shigaense_denovo_692	92	100.000|74.194	1.0|0.0805404001039	3849|310	3849|3849	738950|1295391	742798|1295692	-|+	2
M. shigaense_denovo_850	37	100.000|75.397	1.0|0.734693877551	343|252	343|343	1056469|4649605	1056811|4649855	-|+	2
M. shigaense_denovo_6910	46	100.000|71.930	1.0|0.449830890643	887|399	887|887	1146837|1602330	1147723|1602722	-|+	2
M. shigaense_denovo_3201	88	100.000|75.244	1.0|0.175049730037	7038|1232	7038|7038	2241485|2256888	2248522|2258115	-|+	2
M. shigaense_denovo_3494	81	100.000|71.878	1.0|0.491067117335	2071|1017	2071|2071	4077819|1687913	4079889|1688893	-|+	2
M. shigaense_denovo_319	85	99.975|100.000	0.914764788076|0.0680018630647	3928|292	4294|4294	4846551|4850574	4850477|4850865	-|-	2
M. shigaense_denovo_8290	38	100.000|99.275	1.0|1.0	276|276	276|276	3047392|2028509	3047667|2028784	-|-	2
M. shigaense_denovo_6295	62	100.000|77.879	1.0|0.896744412051	8232|7382	8232|8232	499653|2487669	507884|2494941	-|-	2
M. shigaense_denovo_1557	94	100.000|90.476	1.0|0.0237556561086	3536|84	3536|3536	2395742|2395649	2399277|2395732	-|-	2
M. shigaense_denovo_1788	206	100.000|73.290	1.0|0.0522464261402	5876|307	5876|5876	4464328|4773436	4470203|4773733	-|-	2
M. shigaense_denovo_5903	48	100.000|74.325	1.0|0.652519235542	4029|2629	4029|4029	511420|2495553	515448|2498131	-|-	2
M. shigaense_denovo_7744	46	100.000|98.454	1.0|0.492385786802	1182|582	1182|1182	3710200|3707647	3711381|3708228	-|-	2
M. shigaense_denovo_7742	31	100.000|100.000	1.0|0.960396039604	101|97	101|101	3711567|3708415	3711667|3708511	-|-	2
M. shigaense_denovo_5929	63	100.000|81.015	1.0|0.163008276358	2779|453	2779|2779	1710068|1707833	1712846|1708281	-|-	2
M. shigaense_denovo_5928	35	100.000|85.398	1.0|1.00444444444	225|226	225|225	1708430|1712995	1708654|1713219	-|-	2
M. shigaense_denovo_5927	51	100.000|73.226	1.0|0.551601423488	1124|620	1124|1124	1713411|1709367	1714534|1709963	-|-	2
M. shigaense_denovo_6620	53	100.000|74.198	1.0|0.202479338843	3388|686	3388|3388	998900|1002146	1002287|1002820	-|-	2
M. shigaense_denovo_6370	81	100.000|94.872	1.0|0.0347593582888	1122|39	1122|1122	2902252|2905475	2903373|2905512	-|-	2
M. shigaense_denovo_4099	100	100.000|85.414	1.0|0.307595993322	4792|1474	4792|4792	3253719|1463065	3258510|1464529	-|-	2
M. shigaense_denovo_2649	161	100.000|79.661	1.0|0.317097749412	2977|944	2977|2977	4598705|2538423	4601681|2539355	-|-	2
M. shigaense_denovo_7729	60	100.000|100.000	1.0|1.0	914|914	914|914	1047319|1051768	1048232|1052681	-|-	2
M. shigaense_denovo_120	272	100.000|97.297	1.0|0.00937420825944	3947|37	3947|3947	4611130|1661197	4615076|1661233	-|-	2
M. shigaense_denovo_5140	59	100.000|79.630	1.0|0.219959266802	982|216	982|982	1115123|2423722	1116104|2423937	-|-	2
M. shigaense_denovo_6920	42	99.920|100.000	0.97213622291|0.0503095975232	1256|65	1292|1292	3948405|3949667	3949660|3949731	-|-	2
M. shigaense_denovo_1418	63	100.000|80.282	1.0|0.959459459459	222|213	222|222	2286002|2304537	2286223|2304747	-|-	2
M. shigaense_denovo_1414	156	100.000|100.000	1.0|0.0780141843972	1551|121	1551|1551	2312897|2294061	2314447|2294181	-|-	2
M. shigaense_denovo_5331	46	100.000|82.609	1.0|0.257188498403	1252|322	1252|1252	495327|498191	496578|498512	-|-	2
M. shigaense_denovo_1499	57	100.000|99.928	0.844512195122|0.707317073171	1662|1392	1968|1968	1796454|2546926	1798115|2548317	-|-	2
M. shigaense_denovo_849	231	94.993|87.334	0.985896870868|0.36535918907	4474|1658	4538|4538	1056822|676195	1061286|677828	-|-	2
M. shigaense_denovo_2124	53	100.000|85.903	1.0|0.696319018405	326|227	326|326	3567443|3568990	3567768|3569216	-|-	2
M. shigaense_denovo_1776	82	99.864|100.000	0.53196099675|0.443120260022	2946|2454	5538|5538	5111487|5114603	5114432|5117056	-|-	2
M. shigaense_denovo_1169	48	100.000|84.828	1.0|0.496575342466	584|290	584|584	2693703|2697169	2694286|2697458	-|-	2
M. shigaense_denovo_4191	78	100.000|81.546	1.0|1.02295918367	392|401	392|392	2288467|2306988	2288858|2307388	-|-	2
M. shigaense_denovo_1908	183	99.957|95.543	0.99957337884|0.966723549488	2343|2266	2344|2344	2283487|2302092	2285829|2304351	-|-	2
M. shigaense_denovo_3602	120	100.000|93.750	1.0|0.016393442623	2928|48	2928|2928	527589|530565	530516|530612	-|-	2
M. shigaense_denovo_1381	36	99.659|99.659	1.0|1.0	293|293	293|293	2694900|2698072	2695192|2698364	-|-	2
M. shigaense_denovo_1382	34	99.363|99.363	1.0|1.0	157|157	157|157	2694564|2697736	2694720|2697892	-|-	2
M. shigaense_denovo_572	57	100.000|99.399	1.0|0.642237222758	1037|666	1037|1037	1761574|1758699	1762610|1759364	-|-	2
M. shigaense_denovo_6056	46	100.000|85.806	1.0|0.303326810176	1022|310	1022|1022	5052459|1962108	5053480|1962415	-|-	2
M. shigaense_denovo_4758	78	100.000|72.938	1.0|0.157467532468	2464|388	2464|2464	135922|623373	138385|623740	-|-	2
M. shigaense_denovo_6536	76	100.000|100.000	1.0|1.0	2215|2215	2215|2215	924717|929199	926931|931413	-|-	2
M. shigaense_denovo_6535	33	100.000|100.000	1.0|1.0	203|203	203|203	927014|931496	927216|931698	-|-	2
M. shigaense_denovo_4919	73	100.000|98.000	1.0|0.055617352614	899|50	899|899	1429729|3745365	1430627|3745414	-|-	2
M. shigaense_denovo_1694	267	100.000|73.658	1.0|0.570512820513	1404|801	1404|1404	2807491|268673	2808894|269447	-|-	2
M. shigaense_denovo_5206	44	100.000|100.000	1.0|0.20870602266	1677|350	1677|1677	3047915|2029032	3049591|2029381	-|-	2
M. shigaense_denovo_2183	74	100.000|85.333	1.0|0.9977827051	902|900	902|902	4189822|1554609	4190723|1555504	-|-	2
M. shigaense_denovo_1068	110	100.000|100.000	0.855435351597|0.144564648403	9805|1657	11462|11462	5198079|1	5207883|1657	-|-	2
M. shigaense_denovo_250	79	100.000|72.991	1.0|0.239557739558	2442|585	2442|2442	4107930|2861307	4110371|2861881	-|-	2
M. shigaense_denovo_3899	68	100.000|100.000	0.713282247765|0.27809706258	4468|1742	6264|6264	2181593|2186147	2186060|2187888	-|-	2
M. shigaense_denovo_1025	305	100.000|100.000	1.0|0.0150642445724	4514|68	4514|4514	4017242|4017023	4021755|4017090	-|-	2
M. shigaense_denovo_6322	35	100.000|100.000	1.0|0.138248847926	217|30	217|217	4536121|1856236	4536337|1856265	-|-	2
M. shigaense_denovo_400	46	100.000|72.330	1.0|0.286908077994	1436|412	1436|1436	2471860|2465480	2473295|2465879	-|-	2
M. shigaense_denovo_398	72	100.000|92.217	1.0|0.753318584071	2712|2043	2712|2712	2468298|2474672	2471009|2476699	-|-	2
M. shigaense_denovo_399	46	100.000|80.246	1.0|1.00993377483	1208|1220	1208|1208	2473460|2467092	2474667|2468293	-|-	2
M. shigaense_denovo_5326	83	100.000|100.000	1.0|0.0259067357513	1158|30	1158|1158	2330619|1181503	2331776|1181532	-|-	2
M. shigaense_denovo_718	142	100.000|79.720	1.0|0.0140045049456	10211|143	10211|10211	3109179|3119383	3119389|3119524	-|-	2
M. shigaense_denovo_5670	32	100.000|100.000	1.0|1.0	141|141	141|141	1047015|1051464	1047155|1051604	-|-	2
M. shigaense_denovo_5141	42	100.000|79.874	1.0|0.681428571429	700|477	700|700	1114289|2422702	1114988|2423169	-|-	2
M. shigaense_denovo_953	216	100.000|72.844	1.0|0.212641435817	7689|1635	7689|7689	2087622|3345402	2095310|3347004	-|-	2
M. shigaense_denovo_753	236	100.000|81.757	1.0|0.032765109586	4517|148	4517|4517	1304595|3990494	1309111|3990639	-|-	2
M. shigaense_denovo_2727	51	100.000|87.407	1.0|1.0	270|270	270|270	2500435|949723	2500704|949992	-|-	2
M. shigaense_denovo_2728	56	100.000|99.210	1.0|1.00158227848	632|633	632|632	949021|2499733	949652|2500364	-|-	2
M. shigaense_denovo_2729	54	100.000|84.593	1.0|0.932249322493	369|344	369|369	948307|2499019	948675|2499362	-|-	2
M. shigaense_denovo_6632	38	100	1	253	253	3812541	3812793	+	1
M. shigaense_denovo_6633	34	100	1	277	277	3812802	3813078	+	1
M. shigaense_denovo_3800	37	100	1	430	430	2841632	2842061	+	1
M. shigaense_denovo_3804	41	100	1	353	353	1218812	1219164	+	1
M. shigaense_denovo_3805	56	100	1	2812	2812	1219212	1222023	+	1
M. shigaense_denovo_3806	79	100	1	1866	1866	1222225	1224090	+	1
M. shigaense_denovo_3807	44	100	1	1074	1074	1224145	1225218	+	1
M. shigaense_denovo_5408	33	100	1	189	189	1038208	1038396	+	1
M. shigaense_denovo_5409	35	100	1	342	342	1039038	1039379	+	1
M. shigaense_denovo_5404	43	100	1	771	771	99707	100477	+	1
M. shigaense_denovo_8063	31	100	1	197	197	847067	847263	+	1
M. shigaense_denovo_8062	49	100	1	1964	1964	845094	847057	+	1
M. shigaense_denovo_8061	38	100	1	773	773	844120	844892	+	1
M. shigaense_denovo_8060	39	100	1	259	259	843765	844023	+	1
M. shigaense_denovo_1279	34	100	1	286	286	1067987	1068272	+	1
M. shigaense_denovo_1278	41	100	1	821	821	1066867	1067687	+	1
M. shigaense_denovo_1277	37	100	1	704	704	1066032	1066735	+	1
M. shigaense_denovo_7004	51	100	1	793	793	432782	433574	+	1
M. shigaense_denovo_7005	56	100	1	933	933	433577	434509	+	1
M. shigaense_denovo_7006	31	100	1	60	60	434817	434876	+	1
M. shigaense_denovo_7007	29	100	1	62	62	435029	435090	+	1
M. shigaense_denovo_7000	39	100	1	581	581	259162	259742	+	1
M. shigaense_denovo_7001	38	100	1	528	528	259841	260368	+	1
M. shigaense_denovo_7002	47	100	1	606	606	261091	261696	+	1
M. shigaense_denovo_7003	32	100	1	307	307	432468	432774	+	1
M. shigaense_denovo_7008	31	100	1	263	263	435139	435401	+	1
M. shigaense_denovo_7009	51	100	1	402	402	435795	436196	+	1
M. shigaense_denovo_8607	62	100	1	821	821	104845	105665	+	1
M. shigaense_denovo_8609	41	100	1	1703	1703	3185570	3187272	+	1
M. shigaense_denovo_8608	46	100	1	1081	1081	622176	623256	+	1
M. shigaense_denovo_6069	29	100	1	145	145	2364202	2364346	+	1
M. shigaense_denovo_6068	63	100	1	923	923	2363273	2364195	+	1
M. shigaense_denovo_6067	69	100	1	652	652	2362552	2363203	+	1
M. shigaense_denovo_3127	41	100	1	512	512	2253241	2253752	+	1
M. shigaense_denovo_3126	42	100	1	528	528	2252629	2253156	+	1
M. shigaense_denovo_3125	42	100	1	822	822	2251361	2252182	+	1
M. shigaense_denovo_3124	63	100	1	2430	2430	2248867	2251296	+	1
M. shigaense_denovo_3123	42	100	1	859	859	2247948	2248806	+	1
M. shigaense_denovo_3653	31	100	1	241	241	633290	633530	+	1
M. shigaense_denovo_3659	55	100	1	2252	2252	641707	643958	+	1
M. shigaense_denovo_3658	69	100	1	1220	1220	640388	641607	+	1
M. shigaense_denovo_3129	123	100	1	2285	2285	2254637	2256921	+	1
M. shigaense_denovo_3128	66	100	1	746	746	2253844	2254589	+	1
M. shigaense_denovo_1879	46	100	1	520	520	33300	33819	+	1
M. shigaense_denovo_1878	29	100	1	109	109	33066	33174	+	1
M. shigaense_denovo_1877	36	100	1	588	588	32311	32898	+	1
M. shigaense_denovo_1876	30	100	1	64	64	32241	32304	+	1
M. shigaense_denovo_1875	31	100	1	246	246	31911	32156	+	1
M. shigaense_denovo_1874	32	100	1	188	188	31708	31895	+	1
M. shigaense_denovo_1873	47	100	1	2450	2450	29132	31581	+	1
M. shigaense_denovo_1872	72	100	1	1034	1034	27925	28958	+	1
M. shigaense_denovo_1871	56	100	1	852	852	3163811	3164662	+	1
M. shigaense_denovo_1870	48	100	1	1244	1244	3162367	3163610	+	1
M. shigaense_denovo_2296	36	100	1	807	807	2730227	2731033	+	1
M. shigaense_denovo_2297	35	100	1	247	247	2731042	2731288	+	1
M. shigaense_denovo_2294	29	100	1	115	115	2729812	2729926	+	1
M. shigaense_denovo_2295	29	100	1	111	111	2729929	2730039	+	1
M. shigaense_denovo_2292	39	100	1	781	781	2727418	2728198	+	1
M. shigaense_denovo_2293	52	100	1	1473	1473	2728307	2729779	+	1
M. shigaense_denovo_2290	32	100	1	195	195	2726497	2726691	+	1
M. shigaense_denovo_2291	32	100	1	440	440	2726753	2727192	+	1
M. shigaense_denovo_2838	30	100	1	78	78	271755	271832	+	1
M. shigaense_denovo_2839	46	100	1	895	895	271903	272797	+	1
M. shigaense_denovo_2298	37	100	1	243	243	2731301	2731543	+	1
M. shigaense_denovo_2299	32	100	1	54	54	2731618	2731671	+	1
M. shigaense_denovo_4291	33	100	1	674	674	566824	567497	+	1
M. shigaense_denovo_4292	32	100	1	232	232	567705	567936	+	1
M. shigaense_denovo_4293	30	100	1	152	152	568121	568272	+	1
M. shigaense_denovo_4294	43	100	1	710	710	568619	569328	+	1
M. shigaense_denovo_4295	34	100	1	523	523	569697	570219	+	1
M. shigaense_denovo_4296	45	100	1	310	310	570263	570572	+	1
M. shigaense_denovo_4297	50	100	1	452	452	3087761	3088212	+	1
M. shigaense_denovo_4298	38	100	1	592	592	3088217	3088808	+	1
M. shigaense_denovo_4299	35	100	1	328	328	3088836	3089163	+	1
M. shigaense_denovo_7929	31	100	1	109	109	3550495	3550603	+	1
M. shigaense_denovo_7928	34	100	1	200	200	3550182	3550381	+	1
M. shigaense_denovo_4219	39	100	1	828	828	2835024	2835851	+	1
M. shigaense_denovo_7923	38	100	1	309	309	3548570	3548878	+	1
M. shigaense_denovo_7922	31	100	1	518	518	3547795	3548312	+	1
M. shigaense_denovo_7921	31	100	1	360	360	3547426	3547785	+	1
M. shigaense_denovo_7920	31	100	1	187	187	3546868	3547054	+	1
M. shigaense_denovo_7927	33	100	1	499	499	3549613	3550111	+	1
M. shigaense_denovo_7926	31	100	1	162	162	3549413	3549574	+	1
M. shigaense_denovo_7925	29	100	1	190	190	3549221	3549410	+	1
M. shigaense_denovo_7924	33	100	1	171	171	3549017	3549187	+	1
M. shigaense_denovo_5219	73	100	1	1412	1412	2976384	2977795	+	1
M. shigaense_denovo_5218	39	100	1	238	238	2975326	2975563	+	1
M. shigaense_denovo_5217	32	100	1	461	461	2974799	2975259	+	1
M. shigaense_denovo_5216	32	100	1	226	226	2974360	2974585	+	1
M. shigaense_denovo_5215	50	100	1	782	782	2973426	2974207	+	1
M. shigaense_denovo_5214	78	100	1	4361	4361	4675106	4679466	+	1
M. shigaense_denovo_5213	31	100	1	231	231	4674802	4675032	+	1
M. shigaense_denovo_5212	29	100	1	60	60	4674137	4674196	+	1
M. shigaense_denovo_5211	29	100	1	72	72	4673591	4673662	+	1
M. shigaense_denovo_5210	31	100	1	202	202	4673342	4673543	+	1
M. shigaense_denovo_1518	49	100	1	547	547	2823084	2823630	+	1
M. shigaense_denovo_1519	29	100	1	95	95	2823722	2823816	+	1
M. shigaense_denovo_1514	30	100	1	52	52	2820174	2820225	+	1
M. shigaense_denovo_1515	31	100	1	182	182	2820273	2820454	+	1
M. shigaense_denovo_1516	64	100	1	1503	1503	2821051	2822553	+	1
M. shigaense_denovo_1517	30	100	1	114	114	2822936	2823049	+	1
M. shigaense_denovo_1511	58	100	1	302	302	2016636	2016937	+	1
M. shigaense_denovo_1512	29	100	1	110	110	2016957	2017066	+	1
M. shigaense_denovo_1513	68	100	1	791	791	2017080	2017870	+	1
M. shigaense_denovo_8298	33	100	1	754	754	1049889	1050642	+	1
M. shigaense_denovo_8299	36	100	1	455	455	3824264	3824718	+	1
M. shigaense_denovo_8295	28	100	1	66	66	1049237	1049302	+	1
M. shigaense_denovo_8296	32	100	1	89	89	1049372	1049460	+	1
M. shigaense_denovo_8297	30	100	1	267	267	1049471	1049737	+	1
M. shigaense_denovo_2827	126	100	1	1822	1822	3313788	3315609	+	1
M. shigaense_denovo_8292	48	100	1	309	309	856700	857008	+	1
M. shigaense_denovo_6528	68	100	1	555	555	758775	759329	+	1
M. shigaense_denovo_2826	45	100	1	238	238	3313458	3313695	+	1
M. shigaense_denovo_6520	42	98.454	1.01464	970	956	683529	684498	+	1
M. shigaense_denovo_6522	34	100	1	350	350	685181	685530	+	1
M. shigaense_denovo_6523	31	100	1	140	140	685534	685673	+	1
M. shigaense_denovo_6524	35	100	1	235	235	685771	686005	+	1
M. shigaense_denovo_6525	33	100	1	625	625	686164	686788	+	1
M. shigaense_denovo_6526	45	100	1	231	231	687202	687432	+	1
M. shigaense_denovo_8214	41	100	1	410	410	4731060	4731469	+	1
M. shigaense_denovo_4225	28	100	1	60	60	4756824	4756883	+	1
M. shigaense_denovo_2829	48	100	1	1061	1061	3318047	3319107	+	1
M. shigaense_denovo_2828	77	100	1	2403	2403	3315639	3318041	+	1
M. shigaense_denovo_6298	37	100	1	281	281	4485918	4486198	+	1
M. shigaense_denovo_4224	46	100	1	721	721	1281516	1282236	+	1
M. shigaense_denovo_8218	32	100	1	188	188	4733467	4733654	+	1
M. shigaense_denovo_8219	51	100	1	2782	2782	4733908	4736689	+	1
M. shigaense_denovo_2	297207	100	0.97861	366	374	1439183	1439548	+	1
M. shigaense_denovo_3829	31	100	1	274	274	1127496	1127769	+	1
M. shigaense_denovo_3355	121	100	0.949904	6428	6767	1815993	1822420	+	1
M. shigaense_denovo_3357	35	100	1	368	368	1823056	1823423	+	1
M. shigaense_denovo_5179	64	100	1	697	697	3399573	3400269	+	1
M. shigaense_denovo_5402	38	100	1	404	404	98883	99286	+	1
M. shigaense_denovo_5403	39	100	1	256	256	99385	99640	+	1
M. shigaense_denovo_5400	71	100	1	1406	1406	96721	98126	+	1
M. shigaense_denovo_233	29	100	1	165	165	1357544	1357708	+	1
M. shigaense_denovo_5401	41	100	1	419	419	98223	98641	+	1
M. shigaense_denovo_5406	37	100	1	364	364	100764	101127	+	1
M. shigaense_denovo_231	32	100	1	124	124	1356418	1356541	+	1
M. shigaense_denovo_5407	35	100	1	378	378	101633	102010	+	1
M. shigaense_denovo_230	42	100	1	259	259	1355567	1355825	+	1
M. shigaense_denovo_5405	32	100	1	272	272	100489	100760	+	1
M. shigaense_denovo_892	31	100	1	219	219	151927	152145	+	1
M. shigaense_denovo_891	44	100	1	354	354	150880	151233	+	1
M. shigaense_denovo_890	46	100	1	676	676	2666782	2667457	+	1
M. shigaense_denovo_1075	57	100	1	1119	1119	3667867	3668985	+	1
M. shigaense_denovo_1074	64	100	1	631	631	3667220	3667850	+	1
M. shigaense_denovo_1073	86	100	1	2473	2473	3664615	3667087	+	1
M. shigaense_denovo_1072	30	100	1	87	87	791163	791249	+	1
M. shigaense_denovo_1071	187	100	1	4586	4586	786527	791112	+	1
M. shigaense_denovo_1070	49	100	1	1026	1026	785493	786518	+	1
M. shigaense_denovo_8041	54	100	1	2700	2700	4041088	4043787	+	1
M. shigaense_denovo_8040	56	100	1	1282	1282	4039709	4040990	+	1
M. shigaense_denovo_8042	58	100	1	977	977	3291146	3292122	+	1
M. shigaense_denovo_8045	35	100	1	359	359	1853679	1854037	+	1
M. shigaense_denovo_1217	81	100	1	615	615	3646880	3647494	+	1
M. shigaense_denovo_1216	46	100	1	293	293	3646525	3646817	+	1
M. shigaense_denovo_1219	35	100	1	364	364	3652555	3652918	+	1
M. shigaense_denovo_1218	128	100	1	4260	4260	3648163	3652422	+	1
M. shigaense_denovo_8629	49	100	1	528	528	2915629	2916156	+	1
M. shigaense_denovo_8628	45	100	1	683	683	2914900	2915582	+	1
M. shigaense_denovo_8625	34	100	1	417	417	2174824	2175240	+	1
M. shigaense_denovo_8624	37	100	1	403	403	2174413	2174815	+	1
M. shigaense_denovo_8627	29	100	1	65	65	2914807	2914871	+	1
M. shigaense_denovo_8626	32	100	1	220	220	2913839	2914058	+	1
M. shigaense_denovo_8623	58	100	1	692	692	2173522	2174213	+	1
M. shigaense_denovo_8622	41	100	1	699	699	2172800	2173498	+	1
M. shigaense_denovo_934	31	100	1	79	79	3335153	3335231	+	1
M. shigaense_denovo_935	69	100	1	3145	3145	3335269	3338413	+	1
M. shigaense_denovo_936	137	100	1	4487	4487	3338453	3342939	+	1
M. shigaense_denovo_937	29	100	1	126	126	3342984	3343109	+	1
M. shigaense_denovo_930	196	100	1	2794	2794	3327797	3330590	+	1
M. shigaense_denovo_932	40	100	1	573	573	3334430	3335002	+	1
M. shigaense_denovo_933	29	100	1	53	53	3335096	3335148	+	1
M. shigaense_denovo_938	34	100	1	254	254	3343220	3343473	+	1
M. shigaense_denovo_939	49	100	1	1598	1598	3343600	3345197	+	1
M. shigaense_denovo_7028	29	100	1	52	52	1098606	1098657	+	1
M. shigaense_denovo_7029	29	100	1	214	214	1099654	1099867	+	1
M. shigaense_denovo_7027	65	100	1	798	798	4729849	4730646	+	1
M. shigaense_denovo_6889	67	100	1	998	998	717230	718227	+	1
M. shigaense_denovo_6888	40	100	1	1343	1343	1185745	1187087	+	1
M. shigaense_denovo_6887	30	100	1	129	129	1185441	1185569	+	1
M. shigaense_denovo_6886	56	100	1	790	790	1184476	1185265	+	1
M. shigaense_denovo_6885	43	100	1	979	979	1183396	1184374	+	1
M. shigaense_denovo_6884	38	100	1	261	261	1491425	1491685	+	1
M. shigaense_denovo_6883	32	100	1	675	675	1490238	1490912	+	1
M. shigaense_denovo_6882	40	100	1	649	649	1489588	1490236	+	1
M. shigaense_denovo_6881	31	100	1	156	156	1489081	1489236	+	1
M. shigaense_denovo_795	36	100	1	369	369	2602593	2602961	+	1
M. shigaense_denovo_796	30	100	1	62	62	2603024	2603085	+	1
M. shigaense_denovo_797	33	100	1	276	276	2603376	2603651	+	1
M. shigaense_denovo_798	31	100	1	87	87	2603699	2603785	+	1
M. shigaense_denovo_799	31	100	1	190	190	2603821	2604010	+	1
M. shigaense_denovo_3101	200	100	1	1836	1836	543920	545755	+	1
M. shigaense_denovo_3100	34	100	1	116	116	543710	543825	+	1
M. shigaense_denovo_3103	28	100	1	59	59	546017	546075	+	1
M. shigaense_denovo_3102	29	100	1	63	63	545835	545897	+	1
M. shigaense_denovo_3105	28	100	1	52	52	546637	546688	+	1
M. shigaense_denovo_3104	38	100	1	282	282	546081	546362	+	1
M. shigaense_denovo_3107	96	100	1	747	747	542364	543110	+	1
M. shigaense_denovo_3106	43	100	1	380	380	541905	542284	+	1
M. shigaense_denovo_1859	31	100	1	224	224	3150016	3150239	+	1
M. shigaense_denovo_1858	33	100	1	349	349	3149517	3149865	+	1
M. shigaense_denovo_1851	44	100	1	479	479	3144723	3145201	+	1
M. shigaense_denovo_1850	63	100	1	1631	1631	1953425	1955055	+	1
M. shigaense_denovo_1853	78	100	1	1501	1501	3146022	3147522	+	1
M. shigaense_denovo_1852	54	100	1	763	763	3145245	3146007	+	1
M. shigaense_denovo_1855	39	100	1	647	647	3148079	3148725	+	1
M. shigaense_denovo_1854	48	100	1	427	427	3147639	3148065	+	1
M. shigaense_denovo_1857	37	100	1	307	307	3149132	3149438	+	1
M. shigaense_denovo_1856	28	100	1	116	116	3148884	3148999	+	1
M. shigaense_denovo_2508	96	100	1	1981	1981	3232720	3234700	+	1
M. shigaense_denovo_2509	169	100	1	5340	5340	3234801	3240140	+	1
M. shigaense_denovo_2506	44	100	1	297	297	3225777	3226073	+	1
M. shigaense_denovo_2507	78	100	1	6509	6509	3226152	3232660	+	1
M. shigaense_denovo_2505	34	100	1	189	189	3224998	3225186	+	1
M. shigaense_denovo_4900	54	100	1	504	504	2032740	2033243	+	1
M. shigaense_denovo_4901	32	100	1	205	205	2033754	2033958	+	1
M. shigaense_denovo_4902	29	100	1	57	57	2034100	2034156	+	1
M. shigaense_denovo_4903	30	100	1	222	222	2034362	2034583	+	1
M. shigaense_denovo_4904	33	100	1	510	510	2034590	2035099	+	1
M. shigaense_denovo_4905	31	100	1	300	300	2035286	2035585	+	1
M. shigaense_denovo_4906	35	100	1	141	141	2035674	2035814	+	1
M. shigaense_denovo_4907	30	100	1	140	140	2036479	2036618	+	1
M. shigaense_denovo_7901	45	100	1	447	447	4162731	4163177	+	1
M. shigaense_denovo_7900	37	100	1	413	413	4162252	4162664	+	1
M. shigaense_denovo_8450	30	100	1	186	186	1505556	1505741	+	1
M. shigaense_denovo_8451	30	100	1	201	201	1505894	1506094	+	1
M. shigaense_denovo_8456	29	100	1	99	99	1507880	1507978	+	1
M. shigaense_denovo_8457	45	100	1	521	521	1508167	1508687	+	1
M. shigaense_denovo_8454	29	100	1	98	98	1507603	1507700	+	1
M. shigaense_denovo_8455	28	100	1	58	58	1507702	1507759	+	1
M. shigaense_denovo_5230	36	100	1	201	201	3978674	3978874	+	1
M. shigaense_denovo_1536	94	100	1	1810	1810	3205361	3207170	+	1
M. shigaense_denovo_1537	34	100	1	321	321	3207216	3207536	+	1
M. shigaense_denovo_1534	46	100	1	1139	1139	3203716	3204854	+	1
M. shigaense_denovo_1535	35	100	1	425	425	3204932	3205356	+	1
M. shigaense_denovo_1532	28	100	1	66	66	3201085	3201150	+	1
M. shigaense_denovo_1533	54	100	1	2261	2261	3201360	3203620	+	1
M. shigaense_denovo_1530	101	100	1	5088	5088	3195128	3200215	+	1
M. shigaense_denovo_4011	42	100	1	612	612	1446826	1447437	+	1
M. shigaense_denovo_1538	32	100	1	203	203	3207987	3208189	+	1
M. shigaense_denovo_1539	31	100	1	272	272	3208573	3208844	+	1
M. shigaense_denovo_6500	47	100	1	403	403	4768051	4768453	+	1
M. shigaense_denovo_6501	43	99.949	1	1957	1957	4768465	4770421	+	1
M. shigaense_denovo_8461	41	100	1	691	691	1511147	1511837	+	1
M. shigaense_denovo_8460	36	100	1	749	749	1510287	1511035	+	1
M. shigaense_denovo_8465	35	100	1	264	264	1514080	1514343	+	1
M. shigaense_denovo_8464	37	100	1	355	355	1513652	1514006	+	1
M. shigaense_denovo_148	43	100	1	799	799	372443	373241	+	1
M. shigaense_denovo_146	29	100	1	132	132	371579	371710	+	1
M. shigaense_denovo_4029	49	100	1	1217	1217	3451022	3452238	+	1
M. shigaense_denovo_4025	35	100	1	275	275	3442646	3442920	+	1
M. shigaense_denovo_4023	30	100	1	257	257	3441359	3441615	+	1
M. shigaense_denovo_4404	46	100	1	2082	2082	4655173	4657254	+	1
M. shigaense_denovo_3416	40	100	1	1562	1562	311163	312724	+	1
M. shigaense_denovo_3947	54	100	1	1525	1525	4705159	4706683	+	1
M. shigaense_denovo_3946	33	100	1	243	243	4704822	4705064	+	1
M. shigaense_denovo_3941	43	100	1	457	457	2533406	2533862	+	1
M. shigaense_denovo_3598	30	100	1	50	50	3511156	3511205	+	1
M. shigaense_denovo_3599	33	100	1	308	308	3511247	3511554	+	1
M. shigaense_denovo_3411	29	100	1	55	55	1537078	1537132	+	1
M. shigaense_denovo_3592	29	100	1	54	54	3509097	3509150	+	1
M. shigaense_denovo_3593	29	100	1	137	137	3509193	3509329	+	1
M. shigaense_denovo_3590	100	100	1	6500	6500	3501968	3508467	+	1
M. shigaense_denovo_3942	58	100	1	3499	3499	2533915	2537413	+	1
M. shigaense_denovo_3596	31	100	1	164	164	3510365	3510528	+	1
M. shigaense_denovo_3597	32	100	1	163	163	3510903	3511065	+	1
M. shigaense_denovo_3594	30	100	1	51	51	3510025	3510075	+	1
M. shigaense_denovo_3595	34	100	1	160	160	3510088	3510247	+	1
M. shigaense_denovo_2977	38	100	1	819	819	938140	938958	+	1
M. shigaense_denovo_2976	46	100	1	783	783	937118	937900	+	1
M. shigaense_denovo_2975	28	100	1	96	96	1798929	1799024	+	1
M. shigaense_denovo_2974	30	100	1	116	116	1798808	1798923	+	1
M. shigaense_denovo_2972	31	100	1	157	157	1796444	1796600	+	1
M. shigaense_denovo_2971	66	100	1	1629	1629	1794498	1796126	+	1
M. shigaense_denovo_2970	83	100	1	2385	2385	1792050	1794434	+	1
M. shigaense_denovo_2979	32	100	1	127	127	2121864	2121990	+	1
M. shigaense_denovo_2978	100	100	1	1004	1004	939329	940332	+	1
M. shigaense_denovo_4201	32	100	1	458	458	5004569	5005026	+	1
M. shigaense_denovo_1051	44	100	1	994	994	579083	580076	+	1
M. shigaense_denovo_1050	29	100	1	77	77	578989	579065	+	1
M. shigaense_denovo_1053	30	100	1	135	135	586981	587115	+	1
M. shigaense_denovo_1052	213	100	1	6732	6732	580239	586970	+	1
M. shigaense_denovo_1055	30	100	1	337	337	588652	588988	+	1
M. shigaense_denovo_1054	34	100	1	466	466	587271	587736	+	1
M. shigaense_denovo_1057	30	100	1	74	74	589222	589295	+	1
M. shigaense_denovo_1056	31	100	1	203	203	589014	589216	+	1
M. shigaense_denovo_1059	37	100	1	618	618	590120	590737	+	1
M. shigaense_denovo_1058	40	100	1	573	573	589511	590083	+	1
M. shigaense_denovo_8029	30	100	1	82	82	1970909	1970990	+	1
M. shigaense_denovo_8028	28	100	1	92	92	1970480	1970571	+	1
M. shigaense_denovo_8023	29	100	1	77	77	4558810	4558886	+	1
M. shigaense_denovo_8022	32	100	1	234	234	4558568	4558801	+	1
M. shigaense_denovo_8021	32	100	1	219	219	4558323	4558541	+	1
M. shigaense_denovo_8020	32	100	1	104	104	4557619	4557722	+	1
M. shigaense_denovo_8027	33	100	1	372	372	1970004	1970375	+	1
M. shigaense_denovo_8026	30	100	1	72	72	1969900	1969971	+	1
M. shigaense_denovo_8025	29	100	1	102	102	1969472	1969573	+	1
M. shigaense_denovo_8024	33	100	1	251	251	4558974	4559224	+	1
M. shigaense_denovo_4469	37	100	1	442	442	4632071	4632512	+	1
M. shigaense_denovo_4468	29	100	1	140	140	4631742	4631881	+	1
M. shigaense_denovo_4467	60	100	1	5082	5082	4626629	4631710	+	1
M. shigaense_denovo_4466	32	100	1	567	567	4625907	4626473	+	1
M. shigaense_denovo_4465	41	100	1	560	560	4625266	4625825	+	1
M. shigaense_denovo_4464	45	100	1	535	535	1674436	1674970	+	1
M. shigaense_denovo_4463	44	100	1	1088	1088	1673097	1674184	+	1
M. shigaense_denovo_4462	45	100	1	1429	1429	1671038	1672466	+	1
M. shigaense_denovo_4461	41	100	1	357	357	1670588	1670944	+	1
M. shigaense_denovo_4135	31	100	1	303	303	4928158	4928460	+	1
M. shigaense_denovo_6317	38	100	1	372	372	2960652	2961023	+	1
M. shigaense_denovo_6316	30	100	1	52	52	2960598	2960649	+	1
M. shigaense_denovo_6315	33	100	1	284	284	2960073	2960356	+	1
M. shigaense_denovo_6314	35	100	1	233	233	2959746	2959978	+	1
M. shigaense_denovo_6313	31	100	1	513	513	2958806	2959318	+	1
M. shigaense_denovo_6312	29	100	1	73	73	2958447	2958519	+	1
M. shigaense_denovo_6311	29	100	1	51	51	2958305	2958355	+	1
M. shigaense_denovo_6310	33	100	1	520	520	2957587	2958106	+	1
M. shigaense_denovo_6319	54	100	1	2532	2532	2962328	2964859	+	1
M. shigaense_denovo_6318	43	100	1	603	603	2961655	2962257	+	1
M. shigaense_denovo_3789	28	100	1	93	93	1081968	1082060	+	1
M. shigaense_denovo_3788	35	100	1	179	179	1081763	1081941	+	1
M. shigaense_denovo_3787	34	100	1	347	347	1081307	1081653	+	1
M. shigaense_denovo_3786	42	100	1	1572	1572	1079704	1081275	+	1
M. shigaense_denovo_3785	38	100	1	793	793	533583	534375	+	1
M. shigaense_denovo_3784	29	100	1	136	136	533386	533521	+	1
M. shigaense_denovo_3783	32	100	1	59	59	532906	532964	+	1
M. shigaense_denovo_3782	29	100	1	51	51	532779	532829	+	1
M. shigaense_denovo_3781	31	100	1	202	202	532538	532739	+	1
M. shigaense_denovo_3780	41	100	1	752	752	531735	532486	+	1
M. shigaense_denovo_2560	32	100	1	257	257	3645536	3645792	+	1
M. shigaense_denovo_2561	48	100	1	609	609	3645814	3646422	+	1
M. shigaense_denovo_2562	35	100	1	405	405	1434095	1434499	+	1
M. shigaense_denovo_2563	43	100	1	552	552	1434504	1435055	+	1
M. shigaense_denovo_2564	81	100	1	3965	3965	1435148	1439112	+	1
M. shigaense_denovo_2565	193	100	1	6768	6768	1006272	1013039	+	1
M. shigaense_denovo_2566	44	100	1	613	613	1013046	1013658	+	1
M. shigaense_denovo_2567	29	100	1	147	147	1013663	1013809	+	1
M. shigaense_denovo_5781	35	100	1	199	199	2229323	2229521	+	1
M. shigaense_denovo_5780	36	100	1	296	296	5180134	5180429	+	1
M. shigaense_denovo_5783	33	100	1	59	59	2230284	2230342	+	1
M. shigaense_denovo_5782	37	100	1	275	275	2229896	2230170	+	1
M. shigaense_denovo_5785	58	100	1	2211	2211	2234221	2236431	+	1
M. shigaense_denovo_5784	68	100	1	3745	3745	2230385	2234129	+	1
M. shigaense_denovo_4254	33	100	1	212	212	3846615	3846826	+	1
M. shigaense_denovo_4250	97	100	1	4576	4576	3839348	3843923	+	1
M. shigaense_denovo_4251	48	100	1	571	571	3844203	3844773	+	1
M. shigaense_denovo_4252	35	100	1	1729	1729	3844776	3846504	+	1
M. shigaense_denovo_4253	30	100	1	76	76	3846516	3846591	+	1
M. shigaense_denovo_5253	35	100	1	188	188	2921604	2921791	+	1
M. shigaense_denovo_5257	39	100	1	713	713	2923686	2924398	+	1
M. shigaense_denovo_5256	29	100	1	146	146	2923062	2923207	+	1
M. shigaense_denovo_5255	31	100	1	67	67	2922532	2922598	+	1
M. shigaense_denovo_5254	33	100	1	294	294	2921943	2922236	+	1
M. shigaense_denovo_5259	29	100	1	108	108	2924770	2924877	+	1
M. shigaense_denovo_5258	29	100	1	101	101	2924619	2924719	+	1
M. shigaense_denovo_4071	31	100	1	76	76	3923520	3923595	+	1
M. shigaense_denovo_4072	28	100	1	51	51	3923601	3923651	+	1
M. shigaense_denovo_4073	45	100	1	1320	1320	2259237	2260556	+	1
M. shigaense_denovo_4074	30	100	1	68	68	2260642	2260709	+	1
M. shigaense_denovo_4076	73	100	1	7455	7455	2260982	2268436	+	1
M. shigaense_denovo_4079	37	100	1	220	220	910509	910728	+	1
M. shigaense_denovo_2660	32	100	1	113	113	1340767	1340879	+	1
M. shigaense_denovo_1257	32	100	1	207	207	3124917	3125123	+	1
M. shigaense_denovo_7783	34	100	1	233	233	4994911	4995143	+	1
M. shigaense_denovo_7787	29	100	1	105	105	4996678	4996782	+	1
M. shigaense_denovo_7786	29	100	1	96	96	4996348	4996443	+	1
M. shigaense_denovo_7785	29	100	1	97	97	4996231	4996327	+	1
M. shigaense_denovo_5810	30	100	1	96	96	2903603	2903698	+	1
M. shigaense_denovo_7789	31	100	1	319	319	4997729	4998047	+	1
M. shigaense_denovo_1256	283	100	1	4255	4255	3120535	3124789	+	1
M. shigaense_denovo_7259	66	100	1	1827	1827	4426840	4428666	+	1
M. shigaense_denovo_7258	32	100	1	179	179	4426561	4426739	+	1
M. shigaense_denovo_7529	57	100	1	619	619	3350590	3351208	+	1
M. shigaense_denovo_7528	44	100	1	415	415	3350084	3350498	+	1
M. shigaense_denovo_7255	28	100	1	107	107	4425393	4425499	+	1
M. shigaense_denovo_7254	37	100	1	280	280	4424924	4425203	+	1
M. shigaense_denovo_7257	32	100	1	612	612	4425733	4426344	+	1
M. shigaense_denovo_7256	30	100	1	82	82	4425649	4425730	+	1
M. shigaense_denovo_7251	31	100	1	171	171	1150231	1150401	+	1
M. shigaense_denovo_7250	30	100	1	114	114	1150101	1150214	+	1
M. shigaense_denovo_7253	31	100	1	164	164	4424622	4424785	+	1
M. shigaense_denovo_7252	44	100	1	910	910	4423529	4424438	+	1
M. shigaense_denovo_1254	29	100	1	50	50	3119614	3119663	+	1
M. shigaense_denovo_1255	47	100	1	506	506	3119676	3120181	+	1
M. shigaense_denovo_6788	29	100	1	112	112	1120844	1120955	+	1
M. shigaense_denovo_6789	55	100	1	516	516	1121245	1121760	+	1
M. shigaense_denovo_6784	41	100	1	1026	1026	1118859	1119884	+	1
M. shigaense_denovo_6785	31	100	1	309	309	1120029	1120337	+	1
M. shigaense_denovo_6786	31	100	1	123	123	1120383	1120505	+	1
M. shigaense_denovo_6787	31	100	1	175	175	1120664	1120838	+	1
M. shigaense_denovo_4493	138	100	1	438	438	3587134	3587571	+	1
M. shigaense_denovo_4497	36	100	1	658	658	3589649	3590306	+	1
M. shigaense_denovo_4494	33	100	1	162	162	3587653	3587814	+	1
M. shigaense_denovo_4495	30	100	1	222	222	3588174	3588395	+	1
M. shigaense_denovo_457	37	100	1	239	239	4855069	4855307	+	1
M. shigaense_denovo_456	49	100	1	387	387	4854647	4855033	+	1
M. shigaense_denovo_455	40	100	1	832	832	4853810	4854641	+	1
M. shigaense_denovo_454	40	100	1	301	301	4853383	4853683	+	1
M. shigaense_denovo_453	28	100	1	94	94	1985645	1985738	+	1
M. shigaense_denovo_452	34	100	1	216	216	1985312	1985527	+	1
M. shigaense_denovo_451	38	100	1	657	657	1984519	1985175	+	1
M. shigaense_denovo_450	29	100	1	67	67	1984180	1984246	+	1
M. shigaense_denovo_459	35	100	1	283	283	4857149	4857431	+	1
M. shigaense_denovo_458	46	100	1	1437	1437	4855423	4856859	+	1
M. shigaense_denovo_3579	31	100	1	68	68	3495589	3495656	+	1
M. shigaense_denovo_2951	41	100	1	403	403	1594749	1595151	+	1
M. shigaense_denovo_2950	82	100	1	2948	2948	1591769	1594716	+	1
M. shigaense_denovo_2953	47	100	1	2868	2868	1596026	1598893	+	1
M. shigaense_denovo_2952	40	100	1	708	708	1595248	1595955	+	1
M. shigaense_denovo_2955	54	100	1	601	601	1600357	1600957	+	1
M. shigaense_denovo_2954	59	100	1	917	917	1599240	1600156	+	1
M. shigaense_denovo_2959	30	100	1	82	82	1779164	1779245	+	1
M. shigaense_denovo_2958	38	100	1	552	552	1778562	1779113	+	1
M. shigaense_denovo_301	37	100	1	658	658	2349681	2350338	+	1
M. shigaense_denovo_3316	40	100	1	466	466	3864019	3864484	+	1
M. shigaense_denovo_3317	33	100	1	292	292	3864490	3864781	+	1
M. shigaense_denovo_3318	39	100	1	667	667	3864963	3865629	+	1
M. shigaense_denovo_3319	29	100	1	68	68	3865897	3865964	+	1
M. shigaense_denovo_3655	31	100	1	230	230	634802	635031	+	1
M. shigaense_denovo_3654	43	100	1	983	983	633556	634538	+	1
M. shigaense_denovo_3657	84	100	1	3381	3381	636950	640330	+	1
M. shigaense_denovo_3656	35	100	1	1034	1034	635708	636741	+	1
M. shigaense_denovo_3121	39	100	1	1157	1157	2241150	2242306	+	1
M. shigaense_denovo_3120	32	100	1	164	164	2240773	2240936	+	1
M. shigaense_denovo_2049	69	100	1	5648	5648	5094653	5100300	+	1
M. shigaense_denovo_2048	229	100	1	2245	2245	5092385	5094629	+	1
M. shigaense_denovo_2047	78	100	1	11583	11583	5080756	5092338	+	1
M. shigaense_denovo_2046	39	100	1	349	349	5080354	5080702	+	1
M. shigaense_denovo_8005	36	100	1	565	565	4549187	4549751	+	1
M. shigaense_denovo_8004	32	100	1	212	212	4548918	4549129	+	1
M. shigaense_denovo_8007	36	100	1	394	394	4551925	4552318	+	1
M. shigaense_denovo_8006	38	100	1	574	574	4550997	4551570	+	1
M. shigaense_denovo_8001	51	100	1	1985	1985	4545889	4547873	+	1
M. shigaense_denovo_8000	31	100	1	144	144	4545667	4545810	+	1
M. shigaense_denovo_8003	30	100	1	238	238	4548345	4548582	+	1
M. shigaense_denovo_8002	29	100	1	122	122	4548162	4548283	+	1
M. shigaense_denovo_8009	31	100	1	57	57	4552707	4552763	+	1
M. shigaense_denovo_8008	31	100	1	243	243	4552461	4552703	+	1
M. shigaense_denovo_8559	34	100	1	523	523	1695161	1695683	+	1
M. shigaense_denovo_8558	44	100	1	3252	3252	1691853	1695104	+	1
M. shigaense_denovo_8557	44	100	1	335	335	1691412	1691746	+	1
M. shigaense_denovo_8556	35	100	1	356	356	1691049	1691404	+	1
M. shigaense_denovo_4449	33	100	1	388	388	3807875	3808262	+	1
M. shigaense_denovo_4448	34	100	1	437	437	3807306	3807742	+	1
M. shigaense_denovo_4441	38	100	1	985	985	3803747	3804731	+	1
M. shigaense_denovo_4440	35	100	1	640	640	3803067	3803706	+	1
M. shigaense_denovo_4443	60	100	1	641	641	3804923	3805563	+	1
M. shigaense_denovo_4442	29	100	1	90	90	3804734	3804823	+	1
M. shigaense_denovo_4445	42	100	1	320	320	3805732	3806051	+	1
M. shigaense_denovo_4444	29	100	1	110	110	3805620	3805729	+	1
M. shigaense_denovo_4447	37	100	1	398	398	3806889	3807286	+	1
M. shigaense_denovo_4446	49	100	1	540	540	3806082	3806621	+	1
M. shigaense_denovo_7062	32	100	1	154	154	1946956	1947109	+	1
M. shigaense_denovo_7060	34	100	1	318	318	1945658	1945975	+	1
M. shigaense_denovo_7061	44	100	1	760	760	1946048	1946807	+	1
M. shigaense_denovo_7066	34	100	1	262	262	4147994	4148255	+	1
M. shigaense_denovo_7067	32	100	1	508	508	4148399	4148906	+	1
M. shigaense_denovo_7065	30	100	1	283	283	4147532	4147814	+	1
M. shigaense_denovo_7068	30	100	1	52	52	4149634	4149685	+	1
M. shigaense_denovo_7069	39	100	1	434	434	4149689	4150122	+	1
M. shigaense_denovo_6335	30	100	1	183	183	4215418	4215600	+	1
M. shigaense_denovo_6334	31	100	1	113	113	4215290	4215402	+	1
M. shigaense_denovo_6337	44	100	1	391	391	4217263	4217653	+	1
M. shigaense_denovo_6336	57	100	1	1472	1472	4215619	4217090	+	1
M. shigaense_denovo_1819	72	100	1	1044	1044	5146911	5147954	+	1
M. shigaense_denovo_1818	190	100	1	1481	1481	5145265	5146745	+	1
M. shigaense_denovo_1815	44	100	1	1070	1070	5143080	5144149	+	1
M. shigaense_denovo_1817	36	100	1	365	365	5144898	5145262	+	1
M. shigaense_denovo_1816	32	100	1	342	342	5144482	5144823	+	1
M. shigaense_denovo_2541	114	100	1	1610	1610	811069	812678	+	1
M. shigaense_denovo_2238	176	100	1	9790	9790	2748500	2758289	+	1
M. shigaense_denovo_2239	103	100	1	8313	8313	2758362	2766674	+	1
M. shigaense_denovo_5011	36	100	1	358	358	2952584	2952941	+	1
M. shigaense_denovo_5010	33	100	1	194	194	2952279	2952472	+	1
M. shigaense_denovo_5013	39	100	1	300	300	2953484	2953783	+	1
M. shigaense_denovo_5012	29	100	1	50	50	2953420	2953469	+	1
M. shigaense_denovo_5015	38	100	1	231	231	2954269	2954499	+	1
M. shigaense_denovo_5014	38	100	1	388	388	2953809	2954196	+	1
M. shigaense_denovo_5019	30	100	1	163	163	865199	865361	+	1
M. shigaense_denovo_5018	33	100	1	195	195	864954	865148	+	1
M. shigaense_denovo_5279	35	100	1	457	457	290294	290750	+	1
M. shigaense_denovo_5278	39	100	1	625	625	289556	290180	+	1
M. shigaense_denovo_1616	33	100	1	447	447	103042	103488	+	1
M. shigaense_denovo_5277	31	100	1	69	69	289332	289400	+	1
M. shigaense_denovo_5276	78	100	1	1553	1553	287710	289262	+	1
M. shigaense_denovo_5271	36	100	1	270	270	2938762	2939031	+	1
M. shigaense_denovo_5270	35	100	1	422	422	2938032	2938453	+	1
M. shigaense_denovo_1404	38	100	1	766	766	779425	780190	+	1
M. shigaense_denovo_4222	99	100	1	1672	1672	1278629	1280300	+	1
M. shigaense_denovo_29	36	100	1	1319	1319	1192403	1193721	+	1
M. shigaense_denovo_28	30	100	1	93	93	4878642	4878734	+	1
M. shigaense_denovo_4278	34	100	1	365	365	908557	908921	+	1
M. shigaense_denovo_4274	31	100	1	55	55	903638	903692	+	1
M. shigaense_denovo_4275	35	100	1	311	311	903789	904099	+	1
M. shigaense_denovo_4272	35	100	1	261	261	698828	699088	+	1
M. shigaense_denovo_4273	103	100	1	1220	1220	699101	700320	+	1
M. shigaense_denovo_4271	44	100	1	1519	1519	697259	698777	+	1
M. shigaense_denovo_7757	35	100	1	442	442	4303678	4304119	+	1
M. shigaense_denovo_5909	65	100	1	986	986	3677479	3678464	+	1
M. shigaense_denovo_4058	29	100	1	159	159	4888281	4888439	+	1
M. shigaense_denovo_4059	32	100	1	78	78	4888450	4888527	+	1
M. shigaense_denovo_1577	37	100	1	589	589	2418311	2418899	+	1
M. shigaense_denovo_7501	31	100	1	69	69	3821075	3821143	+	1
M. shigaense_denovo_7503	64	100	1	1240	1240	3821692	3822931	+	1
M. shigaense_denovo_3835	77	100	1	1413	1413	1136930	1138342	+	1
M. shigaense_denovo_3834	32	100	1	165	165	1136756	1136920	+	1
M. shigaense_denovo_4402	30	100	1	238	238	4654423	4654660	+	1
M. shigaense_denovo_3345	38	100	1	292	292	4695175	4695466	+	1
M. shigaense_denovo_8221	31	100	1	56	56	4736990	4737045	+	1
M. shigaense_denovo_3836	28	100	1	52	52	1138593	1138644	+	1
M. shigaense_denovo_8220	28	100	1	99	99	4736879	4736977	+	1
M. shigaense_denovo_3830	38	100	1	275	275	1127817	1128091	+	1
M. shigaense_denovo_8222	28	100	1	105	105	4737141	4737245	+	1
M. shigaense_denovo_3833	62	100	1	6858	6858	1129871	1136728	+	1
M. shigaense_denovo_3832	35	100	1	545	545	1128910	1129454	+	1
M. shigaense_denovo_6168	42	100	1	694	694	492317	493010	+	1
M. shigaense_denovo_1605	70	100	1	1267	1267	5122148	5123414	+	1
M. shigaense_denovo_6169	47	100	1	1045	1045	493040	494084	+	1
M. shigaense_denovo_1606	35	100	1	209	209	5123504	5123712	+	1
M. shigaense_denovo_1607	115	100	1	18591	18591	5124005	5142595	+	1
M. shigaense_denovo_3080	44	100	1	592	592	2850848	2851439	+	1
M. shigaense_denovo_3081	30	100	1	201	201	2851449	2851649	+	1
M. shigaense_denovo_3082	96	100	1	2514	2514	2851672	2854185	+	1
M. shigaense_denovo_3083	29	100	1	109	109	2854390	2854498	+	1
M. shigaense_denovo_3084	42	100	1	529	529	2854505	2855033	+	1
M. shigaense_denovo_3085	29	100	1	116	116	2855848	2855963	+	1
M. shigaense_denovo_3086	53	100	1	1136	1136	2856025	2857160	+	1
M. shigaense_denovo_3087	33	100	1	264	264	2857520	2857783	+	1
M. shigaense_denovo_3088	31	100	1	139	139	2858061	2858199	+	1
M. shigaense_denovo_3089	37	100	1	926	926	2858507	2859432	+	1
M. shigaense_denovo_1601	47	100	1	1341	1341	598846	600186	+	1
M. shigaense_denovo_3888	54	100	1	713	713	2179683	2180395	+	1
M. shigaense_denovo_3889	31	100	1	135	135	2180398	2180532	+	1
M. shigaense_denovo_3338	135	100	1	1666	1666	4690679	4692344	+	1
M. shigaense_denovo_3339	29	100	1	62	62	4692699	4692760	+	1
M. shigaense_denovo_3883	34	100	1	410	410	2176806	2177215	+	1
M. shigaense_denovo_3884	29	100	1	51	51	2177384	2177434	+	1
M. shigaense_denovo_3885	30	100	1	344	344	2177442	2177785	+	1
M. shigaense_denovo_3887	40	100	1	369	369	2179049	2179417	+	1
M. shigaense_denovo_1603	37	100	1	513	513	601014	601526	+	1
M. shigaense_denovo_5482	30	100	1	114	114	3763246	3763359	+	1
M. shigaense_denovo_5483	31	100	1	399	399	3763398	3763796	+	1
M. shigaense_denovo_5480	32	100	1	442	442	3762452	3762893	+	1
M. shigaense_denovo_5481	34	100	1	196	196	3762976	3763171	+	1
M. shigaense_denovo_5486	29	100	1	100	100	3764445	3764544	+	1
M. shigaense_denovo_5487	39	100	1	382	382	5183285	5183666	+	1
M. shigaense_denovo_5484	41	100	1	256	256	3763972	3764227	+	1
M. shigaense_denovo_5485	30	100	1	55	55	3764379	3764433	+	1
M. shigaense_denovo_5488	30	100	1	56	56	5183689	5183744	+	1
M. shigaense_denovo_5489	31	100	1	139	139	5183750	5183888	+	1
M. shigaense_denovo_2939	29	100	1	52	52	1569773	1569824	+	1
M. shigaense_denovo_2938	46	100	1	3327	3327	1566435	1569761	+	1
M. shigaense_denovo_2689	78	100	1	1974	1974	14822	16795	+	1
M. shigaense_denovo_2688	44	100	1	651	651	14161	14811	+	1
M. shigaense_denovo_2933	47	100	1	2085	2085	1563259	1565343	+	1
M. shigaense_denovo_2932	30	100	1	215	215	1562650	1562864	+	1
M. shigaense_denovo_2931	29	100	1	129	129	1562456	1562584	+	1
M. shigaense_denovo_2930	40	100	1	1379	1379	1561076	1562454	+	1
M. shigaense_denovo_2937	34	100	1	348	348	1565962	1566309	+	1
M. shigaense_denovo_2936	32	100	1	248	248	1565702	1565949	+	1
M. shigaense_denovo_2935	30	100	1	76	76	1565625	1565700	+	1
M. shigaense_denovo_2934	33	100	1	218	218	1565369	1565586	+	1
M. shigaense_denovo_8577	28	100	1	66	66	3026516	3026581	+	1
M. shigaense_denovo_8576	31	100	1	75	75	3026313	3026387	+	1
M. shigaense_denovo_8579	49	100	1	2253	2253	3027506	3029758	+	1
M. shigaense_denovo_8578	29	100	1	57	57	3026834	3026890	+	1
M. shigaense_denovo_6049	39	100	1	531	531	1096595	1097125	+	1
M. shigaense_denovo_4427	29	100	1	126	126	3797215	3797340	+	1
M. shigaense_denovo_4426	67	100	1	4958	4958	3792130	3797087	+	1
M. shigaense_denovo_4425	33	100	1	239	239	3705775	3706013	+	1
M. shigaense_denovo_4424	30	100	1	192	192	3791052	3791243	+	1
M. shigaense_denovo_4429	41	100	1	1492	1492	3797838	3799329	+	1
M. shigaense_denovo_4428	32	100	1	176	176	3797352	3797527	+	1
M. shigaense_denovo_8689	32	100	1	221	221	3383690	3383910	+	1
M. shigaense_denovo_8688	41	100	1	702	702	3382818	3383519	+	1
M. shigaense_denovo_888	32	100	1	265	265	2666099	2666363	+	1
M. shigaense_denovo_889	37	100	1	264	264	2666380	2666643	+	1
M. shigaense_denovo_880	53	100	1	1128	1128	2657275	2658402	+	1
M. shigaense_denovo_881	43	100	1	615	615	2658685	2659299	+	1
M. shigaense_denovo_882	196	100	1	3866	3866	2659365	2663230	+	1
M. shigaense_denovo_883	28	100	1	51	51	2663286	2663336	+	1
M. shigaense_denovo_228	706	100	1	3760	3760	1349789	1353548	+	1
M. shigaense_denovo_229	89	100	1	1779	1779	1353605	1355383	+	1
M. shigaense_denovo_886	31	100	1	133	133	2665004	2665136	+	1
M. shigaense_denovo_887	31	100	1	210	210	2665805	2666014	+	1
M. shigaense_denovo_21	29	100	1	97	97	4873557	4873653	+	1
M. shigaense_denovo_20	34	100	1	312	312	4872446	4872757	+	1
M. shigaense_denovo_3330	86	100	1	351	351	1443939	1444289	+	1
M. shigaense_denovo_8416	38	100	1	214	214	1679988	1680201	+	1
M. shigaense_denovo_23	4109	100	1	3133	3133	4874269	4877401	+	1
M. shigaense_denovo_22	37	100	1	279	279	4873973	4874251	+	1
M. shigaense_denovo_2212	29	100	1	196	196	863895	864090	+	1
M. shigaense_denovo_2213	32	100	1	193	193	864396	864588	+	1
M. shigaense_denovo_2210	36	100	1	700	700	862266	862965	+	1
M. shigaense_denovo_2211	41	100	1	696	696	863160	863855	+	1
M. shigaense_denovo_24	30	100	1	127	127	4877596	4877722	+	1
M. shigaense_denovo_27	29	100	1	65	65	4878545	4878609	+	1
M. shigaense_denovo_26	33	100	1	271	271	4878260	4878530	+	1
M. shigaense_denovo_2440	37	100	1	345	345	1734020	1734364	+	1
M. shigaense_denovo_1442	32	100	1	205	205	4094927	4095131	+	1
M. shigaense_denovo_1443	39	100	1	433	433	4095142	4095574	+	1
M. shigaense_denovo_8071	29	100	1	80	80	2123914	2123993	+	1
M. shigaense_denovo_1440	140	100	1	1590	1590	4088960	4090549	+	1
M. shigaense_denovo_5291	36	100	1	207	207	3516854	3517060	+	1
M. shigaense_denovo_5290	42	100	1	474	474	3516350	3516823	+	1
M. shigaense_denovo_6805	32	100	1	265	265	1958429	1958693	+	1
M. shigaense_denovo_1441	177	100	1	3925	3925	4090797	4094721	+	1
M. shigaense_denovo_6803	34	100	1	277	277	1957545	1957821	+	1
M. shigaense_denovo_6802	33	100	1	210	210	1957314	1957523	+	1
M. shigaense_denovo_6801	36	100	1	464	464	1956806	1957269	+	1
M. shigaense_denovo_1447	46	100	1	1072	1072	4101823	4102894	+	1
M. shigaense_denovo_4218	29	100	1	62	62	2834695	2834756	+	1
M. shigaense_denovo_4210	38	100	1	459	459	5015498	5015956	+	1
M. shigaense_denovo_4211	74	100	1	1555	1555	4268430	4269984	+	1
M. shigaense_denovo_4212	122	100	1	399	399	4270193	4270591	+	1
M. shigaense_denovo_4213	31	100	1	174	174	2831892	2832065	+	1
M. shigaense_denovo_4214	41	100	1	753	753	2832326	2833078	+	1
M. shigaense_denovo_4215	35	100	1	182	182	2833499	2833680	+	1
M. shigaense_denovo_4216	30	100	1	97	97	2834086	2834182	+	1
M. shigaense_denovo_4217	45	100	1	453	453	2834207	2834659	+	1
M. shigaense_denovo_7747	46	100	1	1015	1015	4297153	4298167	+	1
M. shigaense_denovo_7746	45	100	1	460	460	4296310	4296769	+	1
M. shigaense_denovo_7749	47	100	1	1214	1214	4298721	4299934	+	1
M. shigaense_denovo_7748	38	100	1	474	474	4298171	4298644	+	1
M. shigaense_denovo_8216	30	100	1	281	281	4732620	4732900	+	1
M. shigaense_denovo_8217	32	100	1	235	235	4733140	4733374	+	1
M. shigaense_denovo_8212	53	100	1	1050	1050	3860221	3861270	+	1
M. shigaense_denovo_8213	49	100	1	2402	2402	3861346	3863747	+	1
M. shigaense_denovo_4562	44	100	1	1624	1624	158855	160478	+	1
M. shigaense_denovo_4563	31	100	1	162	162	160899	161060	+	1
M. shigaense_denovo_1445	41	100	1	583	583	4098133	4098715	+	1
M. shigaense_denovo_4560	36	100	1	263	263	3884491	3884753	+	1
M. shigaense_denovo_4561	37	100	1	177	177	158660	158836	+	1
M. shigaense_denovo_4566	35	100	1	503	503	161741	162243	+	1
M. shigaense_denovo_4567	69	100	1	1900	1900	162252	164151	+	1
M. shigaense_denovo_4564	34	100	1	217	217	161072	161288	+	1
M. shigaense_denovo_4565	30	100	1	99	99	161327	161425	+	1
M. shigaense_denovo_25	32	100	1	392	392	4877724	4878115	+	1
M. shigaense_denovo_8473	42	100	1	979	979	2942593	2943571	+	1
M. shigaense_denovo_8474	51	100	1	468	468	2943852	2944319	+	1
M. shigaense_denovo_8475	30	100	1	231	231	2944452	2944682	+	1
M. shigaense_denovo_8476	43	100	1	1161	1161	2944690	2945850	+	1
M. shigaense_denovo_8477	31	100	1	97	97	2945858	2945954	+	1
M. shigaense_denovo_2421	35	100	1	292	292	4593933	4594224	+	1
M. shigaense_denovo_2420	45	100	1	504	504	4593374	4593877	+	1
M. shigaense_denovo_2422	38	100	1	701	701	4594243	4594943	+	1
M. shigaense_denovo_1510	31	100	1	255	255	2016348	2016602	+	1
M. shigaense_denovo_3952	70	100	1	4613	4613	4708140	4712752	+	1
M. shigaense_denovo_149	29	100	1	56	56	373265	373320	+	1
M. shigaense_denovo_4032	30	100	1	167	167	3457896	3458062	+	1
M. shigaense_denovo_3953	31	100	1	242	242	4712774	4713015	+	1
M. shigaense_denovo_145	38	100	1	440	440	371037	371476	+	1
M. shigaense_denovo_147	45	100	1	651	651	371760	372410	+	1
M. shigaense_denovo_3407	95	100	1	638	638	1532194	1532831	+	1
M. shigaense_denovo_3531	37	100	1	662	662	4867673	4868334	+	1
M. shigaense_denovo_3532	130	100	1	481	481	4868610	4869090	+	1
M. shigaense_denovo_3533	34	100	1	852	852	4869206	4870057	+	1
M. shigaense_denovo_3534	34	100	1	423	423	4870656	4871078	+	1
M. shigaense_denovo_3402	36	100	1	315	315	1774689	1775003	+	1
M. shigaense_denovo_3955	31	100	1	172	172	4715910	4716081	+	1
M. shigaense_denovo_4869	55	100	1	1337	1337	1282356	1283692	+	1
M. shigaense_denovo_2915	53	100	1	2668	2668	3984055	3986722	+	1
M. shigaense_denovo_2914	29	100	1	73	73	3983498	3983570	+	1
M. shigaense_denovo_2916	206	100	1	3299	3299	3986801	3990099	+	1
M. shigaense_denovo_2911	39	100	1	373	373	3982687	3983059	+	1
M. shigaense_denovo_2910	29	100	1	66	66	3982313	3982378	+	1
M. shigaense_denovo_2913	31	100	1	111	111	3983382	3983492	+	1
M. shigaense_denovo_2912	29	100	1	60	60	3983069	3983128	+	1
M. shigaense_denovo_8515	60	100	1	268	268	296652	296919	+	1
M. shigaense_denovo_4409	29	100	1	88	88	4660503	4660590	+	1
M. shigaense_denovo_4408	51	100	1	1260	1260	4659226	4660485	+	1
M. shigaense_denovo_1439	29	100	1	154	154	4088734	4088887	+	1
M. shigaense_denovo_1438	30	100	1	74	74	4088616	4088689	+	1
M. shigaense_denovo_4405	53	100	1	296	296	4657259	4657554	+	1
M. shigaense_denovo_4407	101	100	1	883	883	4658330	4659212	+	1
M. shigaense_denovo_4406	46	100	1	283	283	4657755	4658037	+	1
M. shigaense_denovo_4401	40	100	1	394	394	4653900	4654293	+	1
M. shigaense_denovo_4400	38	100	1	357	357	4653510	4653866	+	1
M. shigaense_denovo_4403	48	100	1	352	352	4654707	4655058	+	1
M. shigaense_denovo_6375	48	100	1	2132	2132	1385841	1387972	+	1
M. shigaense_denovo_6374	48	100	1	694	694	1385072	1385765	+	1
M. shigaense_denovo_6377	40	100	1	677	677	1388487	1389163	+	1
M. shigaense_denovo_6376	31	100	1	150	150	1388297	1388446	+	1
M. shigaense_denovo_6373	30	100	1	142	142	1384899	1385040	+	1
M. shigaense_denovo_6372	29	100	1	78	78	1384742	1384819	+	1
M. shigaense_denovo_7981	31	100	1	127	127	2968776	2968902	+	1
M. shigaense_denovo_6379	43	100	1	1939	1939	1391187	1393125	+	1
M. shigaense_denovo_1705	166	100	1	5946	5946	982084	988029	+	1
M. shigaense_denovo_6809	43	100	1	642	642	1960547	1961188	+	1
M. shigaense_denovo_6808	42	100	1	1088	1088	1959395	1960482	+	1
M. shigaense_denovo_1704	43	100	1	861	861	981162	982022	+	1
M. shigaense_denovo_8260	43	100	1	267	267	2614104	2614370	+	1
M. shigaense_denovo_1707	44	100	1	1169	1169	988157	989325	+	1
M. shigaense_denovo_2278	30	100	1	125	125	1558529	1558653	+	1
M. shigaense_denovo_2279	37	100	1	551	551	1558657	1559207	+	1
M. shigaense_denovo_6521	34	100	1	480	480	684543	685022	+	1
M. shigaense_denovo_2270	29	100	1	157	157	4188881	4189037	+	1
M. shigaense_denovo_2271	45	100	1	242	242	4189131	4189372	+	1
M. shigaense_denovo_2272	34	100	1	165	165	1554258	1554422	+	1
M. shigaense_denovo_2274	36	100	1	363	363	1556478	1556840	+	1
M. shigaense_denovo_2275	31	100	1	217	217	1556952	1557168	+	1
M. shigaense_denovo_2276	30	100	1	86	86	1557189	1557274	+	1
M. shigaense_denovo_2277	40	100	1	510	510	1557534	1558043	+	1
M. shigaense_denovo_6527	34	100	1	699	699	758028	758726	+	1
M. shigaense_denovo_4834	32	100	1	328	328	4057930	4058257	+	1
M. shigaense_denovo_1147	63	100	1	3186	3186	1620467	1623652	+	1
M. shigaense_denovo_4835	65	100	1	3125	3125	4058545	4061669	+	1
M. shigaense_denovo_608	91	100	1	977	977	733334	734310	+	1
M. shigaense_denovo_4314	32	100	1	337	337	3094243	3094579	+	1
M. shigaense_denovo_606	53	100	1	959	959	731516	732474	+	1
M. shigaense_denovo_607	37	100	1	670	670	732593	733262	+	1
M. shigaense_denovo_604	31	100	1	275	275	730499	730773	+	1
M. shigaense_denovo_605	32	100	1	260	260	731155	731414	+	1
M. shigaense_denovo_602	33	100	1	191	191	729394	729584	+	1
M. shigaense_denovo_4317	32	100	1	126	126	3095183	3095308	+	1
M. shigaense_denovo_600	97	100	1	8778	8778	720084	728861	+	1
M. shigaense_denovo_4316	29	100	1	131	131	3095050	3095180	+	1
M. shigaense_denovo_3279	36	100	1	558	558	3857766	3858323	+	1
M. shigaense_denovo_3278	35	100	1	298	298	3857077	3857374	+	1
M. shigaense_denovo_3277	75	100	1	6692	6692	3850313	3857004	+	1
M. shigaense_denovo_1143	29	100	1	78	78	1619093	1619170	+	1
M. shigaense_denovo_3275	29	100	1	69	69	3848988	3849056	+	1
M. shigaense_denovo_3274	45	100	1	1600	1600	3847346	3848945	+	1
M. shigaense_denovo_3273	29	100	1	60	60	3847261	3847320	+	1
M. shigaense_denovo_3272	46	100	1	658	658	818193	818850	+	1
M. shigaense_denovo_3271	64	100	1	5159	5159	812955	818113	+	1
M. shigaense_denovo_1142	45	100	1	604	604	1618426	1619029	+	1
M. shigaense_denovo_1141	86	100	1	3760	3760	1614642	1618401	+	1
M. shigaense_denovo_5050	43	100	1	715	715	1217923	1218637	+	1
M. shigaense_denovo_609	47	100	1	1009	1009	734383	735391	+	1
M. shigaense_denovo_5729	46	100	1	1542	1542	2131555	2133096	+	1
M. shigaense_denovo_5728	34	100	1	459	459	2130826	2131284	+	1
M. shigaense_denovo_603	34	100	1	597	597	729741	730337	+	1
M. shigaense_denovo_2902	40	100	1	465	465	2050538	2051002	+	1
M. shigaense_denovo_2903	36	100	1	597	597	2051007	2051603	+	1
M. shigaense_denovo_2900	30	100	1	162	162	2050092	2050253	+	1
M. shigaense_denovo_2901	30	100	1	185	185	2050259	2050443	+	1
M. shigaense_denovo_2907	44	100	1	309	309	3979872	3980180	+	1
M. shigaense_denovo_2905	34	100	1	250	250	2054191	2054440	+	1
M. shigaense_denovo_3276	41	100	1	873	873	3849355	3850227	+	1
M. shigaense_denovo_4897	42	100	1	786	786	2031068	2031853	+	1
M. shigaense_denovo_4894	87	100	1	4545	4545	2022252	2026796	+	1
M. shigaense_denovo_3270	138	100	1	1005	1005	3518197	3519201	+	1
M. shigaense_denovo_4898	30	100	1	192	192	2032037	2032228	+	1
M. shigaense_denovo_4899	34	100	1	354	354	2032345	2032698	+	1
M. shigaense_denovo_7761	29	100	1	184	184	5033220	5033403	+	1
M. shigaense_denovo_7760	40	100	1	548	548	5032608	5033155	+	1
M. shigaense_denovo_7763	64	100	1	327	327	1756998	1757324	+	1
M. shigaense_denovo_7762	51	100	1	1105	1105	5033542	5034646	+	1
M. shigaense_denovo_8234	40	100	1	1724	1724	3294922	3296645	+	1
M. shigaense_denovo_8235	39	100	1	867	867	3296848	3297714	+	1
M. shigaense_denovo_8233	36	100	1	984	984	3293898	3294881	+	1
M. shigaense_denovo_5943	35	100	1	801	801	3771191	3771991	+	1
M. shigaense_denovo_5942	38	100	1	574	574	3770554	3771127	+	1
M. shigaense_denovo_5941	30	100	1	97	97	3769778	3769874	+	1
M. shigaense_denovo_5940	61	100	1	2859	2859	3766644	3769502	+	1
M. shigaense_denovo_5947	36	100	1	292	292	3773494	3773785	+	1
M. shigaense_denovo_5946	33	100	1	356	356	3772981	3773336	+	1
M. shigaense_denovo_5945	34	100	1	302	302	3772643	3772944	+	1
M. shigaense_denovo_5944	40	100	1	593	593	3772018	3772610	+	1
M. shigaense_denovo_5949	31	100	1	370	370	3774589	3774958	+	1
M. shigaense_denovo_5948	34	100	1	445	445	3773920	3774364	+	1
M. shigaense_denovo_4097	120	100	1	896	896	1645300	1646195	+	1
M. shigaense_denovo_6297	41	100	1	270	270	4485640	4485909	+	1
M. shigaense_denovo_5653	40	100	1	1251	1251	3375091	3376341	+	1
M. shigaense_denovo_5652	30	100	1	133	133	3374793	3374925	+	1
M. shigaense_denovo_6299	30	100	1	85	85	4486453	4486537	+	1
M. shigaense_denovo_6490	62	100	1	1549	1549	1430582	1432130	+	1
M. shigaense_denovo_6491	45	100	1	346	346	1432193	1432538	+	1
M. shigaense_denovo_6495	64	100	1	2743	2743	4761524	4764266	+	1
M. shigaense_denovo_6496	36	100	1	440	440	4764486	4764925	+	1
M. shigaense_denovo_6497	29	100	1	96	96	4765278	4765373	+	1
M. shigaense_denovo_7549	40	100	1	230	230	1458071	1458300	+	1
M. shigaense_denovo_7819	32	100	1	351	351	1359071	1359421	+	1
M. shigaense_denovo_1367	48	99.964	1	2741	2741	2147353	2150093	+	1
M. shigaense_denovo_1366	62	100	1	2243	2243	2145043	2147285	+	1
M. shigaense_denovo_5727	40	100	1	380	380	2130339	2130718	+	1
M. shigaense_denovo_5726	49	100	1	1363	1363	2128904	2130266	+	1
M. shigaense_denovo_6140	35	100	1	481	481	423062	423542	+	1
M. shigaense_denovo_5725	32	100	1	147	147	2128692	2128838	+	1
M. shigaense_denovo_167	63	100	1	996	996	1872403	1873398	+	1
M. shigaense_denovo_166	64	100	1	5773	5773	1866482	1872254	+	1
M. shigaense_denovo_165	37	100	1	246	246	1866044	1866289	+	1
M. shigaense_denovo_164	34	100	1	182	182	1865793	1865974	+	1
M. shigaense_denovo_163	93	100	1	2377	2377	396279	398655	+	1
M. shigaense_denovo_162	76	100	1	1713	1713	394487	396199	+	1
M. shigaense_denovo_161	34	100	1	349	349	394101	394449	+	1
M. shigaense_denovo_160	54	100	1	2634	2634	391434	394067	+	1
M. shigaense_denovo_169	164	100	1	20225	20225	1876711	1896935	+	1
M. shigaense_denovo_168	119	100	1	3145	3145	1873522	1876666	+	1
M. shigaense_denovo_3046	39	100	1	796	796	825397	826192	+	1
M. shigaense_denovo_3047	31	100	1	156	156	826213	826368	+	1
M. shigaense_denovo_3517	36	100	1	431	431	4009085	4009515	+	1
M. shigaense_denovo_3515	53	100	1	4180	4180	4004243	4008422	+	1
M. shigaense_denovo_3518	35	100	1	297	297	4009517	4009813	+	1
M. shigaense_denovo_3519	29	100	1	91	91	4010158	4010248	+	1
M. shigaense_denovo_994	58	100	1	1733	1733	1646429	1648161	+	1
M. shigaense_denovo_8175	32	100	1	246	246	4281860	4282105	+	1
M. shigaense_denovo_8174	46	100	1	497	497	2021255	2021751	+	1
M. shigaense_denovo_8176	44	100	1	2007	2007	4282113	4284119	+	1
M. shigaense_denovo_2640	93	100	1	4959	4959	712132	717090	+	1
M. shigaense_denovo_2399	29	100	1	93	93	4346727	4346819	+	1
M. shigaense_denovo_2398	33	100	1	221	221	4346427	4346647	+	1
M. shigaense_denovo_7881	32	100	1	139	139	2587990	2588128	+	1
M. shigaense_denovo_8534	35	100	1	393	393	4281000	4281392	+	1
M. shigaense_denovo_8533	31	100	1	190	190	4280492	4280681	+	1
M. shigaense_denovo_8532	41	100	1	962	962	4279106	4280067	+	1
M. shigaense_denovo_5552	75	100	1	2607	2607	4105065	4107671	+	1
M. shigaense_denovo_8399	33	100	1	227	227	4564234	4564460	+	1
M. shigaense_denovo_8398	32	100	1	193	193	4563893	4564085	+	1
M. shigaense_denovo_8391	33	100	1	144	144	3932295	3932438	+	1
M. shigaense_denovo_8390	29	100	1	52	52	3932209	3932260	+	1
M. shigaense_denovo_8393	33	100	1	451	451	3934383	3934833	+	1
M. shigaense_denovo_8392	49	100	1	1415	1415	3932913	3934327	+	1
M. shigaense_denovo_8395	28	100	1	66	66	3935756	3935821	+	1
M. shigaense_denovo_8394	43	100	1	718	718	3934949	3935666	+	1
M. shigaense_denovo_8396	30	100	1	119	119	3936111	3936229	+	1
M. shigaense_denovo_7156	48	100	1	1127	1127	1701016	1702142	+	1
M. shigaense_denovo_7157	57	100	1	938	938	1713416	1714353	+	1
M. shigaense_denovo_7155	64	100	1	1157	1157	1699819	1700975	+	1
M. shigaense_denovo_7152	65	100	1	706	706	1663268	1663973	+	1
M. shigaense_denovo_7153	66	100	1	2315	2315	1680505	1682819	+	1
M. shigaense_denovo_7150	30	100	1	206	206	1662504	1662709	+	1
M. shigaense_denovo_7151	49	100	1	361	361	1662782	1663142	+	1
M. shigaense_denovo_6821	41	100	1	699	699	4681102	4681800	+	1
M. shigaense_denovo_6820	35	100	1	263	263	3381477	3381739	+	1
M. shigaense_denovo_6823	30	100	1	193	193	4682602	4682794	+	1
M. shigaense_denovo_6822	40	100	1	471	471	4681859	4682329	+	1
M. shigaense_denovo_6825	30	100	1	106	106	4684959	4685064	+	1
M. shigaense_denovo_6824	53	100	1	1267	1267	4683518	4684784	+	1
M. shigaense_denovo_6827	34	100	1	284	284	4685255	4685538	+	1
M. shigaense_denovo_6826	28	100	1	54	54	4685192	4685245	+	1
M. shigaense_denovo_6829	47	100	1	808	808	4685844	4686651	+	1
M. shigaense_denovo_6828	28	100	1	50	50	4685662	4685711	+	1
M. shigaense_denovo_2256	80	100	1	2574	2574	324991	327564	+	1
M. shigaense_denovo_2257	37	100	1	358	358	4165850	4166207	+	1
M. shigaense_denovo_2258	28	100	1	95	95	4166217	4166311	+	1
M. shigaense_denovo_2259	28	100	1	68	68	4166409	4166476	+	1
M. shigaense_denovo_598	30	100	1	61	61	718915	718975	+	1
M. shigaense_denovo_599	38	100	1	774	774	719269	720042	+	1
M. shigaense_denovo_597	58	100	1	482	482	718411	718892	+	1
M. shigaense_denovo_629	101	100	1	726	726	1309213	1309938	+	1
M. shigaense_denovo_620	29	100	1	68	68	756334	756401	+	1
M. shigaense_denovo_621	36	100	1	386	386	756663	757048	+	1
M. shigaense_denovo_622	34	100	1	547	547	757050	757596	+	1
M. shigaense_denovo_623	33	100	1	218	218	757624	757841	+	1
M. shigaense_denovo_624	48	100	1	1394	1394	209272	210665	+	1
M. shigaense_denovo_3259	36	100	1	1314	1314	2005855	2007168	+	1
M. shigaense_denovo_3251	29	100	1	177	177	1999466	1999642	+	1
M. shigaense_denovo_3250	30	100	1	109	109	1999313	1999421	+	1
M. shigaense_denovo_3253	45	100	1	612	612	2000200	2000811	+	1
M. shigaense_denovo_3252	31	100	1	229	229	1999891	2000119	+	1
M. shigaense_denovo_3255	124	100	1	1310	1310	2003689	2004998	+	1
M. shigaense_denovo_3254	101	100	1	2678	2678	2000933	2003610	+	1
M. shigaense_denovo_5703	28	100	1	72	72	4879760	4879831	+	1
M. shigaense_denovo_5705	34	100	1	240	240	4880129	4880368	+	1
M. shigaense_denovo_5704	33	100	1	282	282	4879833	4880114	+	1
M. shigaense_denovo_5707	31	100	1	122	122	4881015	4881136	+	1
M. shigaense_denovo_5706	30	100	1	97	97	4880527	4880623	+	1
M. shigaense_denovo_5709	93	100	1	601	601	4881824	4882424	+	1
M. shigaense_denovo_5708	36	100	1	350	350	4881266	4881615	+	1
M. shigaense_denovo_1604	48	100	1	2376	2376	601569	603944	+	1
M. shigaense_denovo_38	57	100	1	743	743	1210539	1211281	+	1
M. shigaense_denovo_19	29	100	1	129	129	4872289	4872417	+	1
M. shigaense_denovo_39	29	100	1	52	52	1211434	1211485	+	1
M. shigaense_denovo_1629	224	100	1	2317	2317	694702	697018	+	1
M. shigaense_denovo_1626	139	100	1	7105	7105	1234869	1241973	+	1
M. shigaense_denovo_1627	35	100	1	185	185	1242154	1242338	+	1
M. shigaense_denovo_1625	38	100	1	303	303	1234486	1234788	+	1
M. shigaense_denovo_8258	39	100	1	406	406	3100226	3100631	+	1
M. shigaense_denovo_8259	42	100	1	826	826	3100777	3101602	+	1
M. shigaense_denovo_8238	31	100	1	109	109	3298964	3299072	+	1
M. shigaense_denovo_8239	33	100	1	413	413	3299263	3299675	+	1
M. shigaense_denovo_4416	36	100	1	784	784	4667636	4668419	+	1
M. shigaense_denovo_4143	63	100	1	2115	2115	4933134	4935248	+	1
M. shigaense_denovo_3356	36	100	1	556	556	1822454	1823009	+	1
M. shigaense_denovo_365	29	100	1	123	123	4820678	4820800	+	1
M. shigaense_denovo_364	33	100	1	455	455	4820177	4820631	+	1
M. shigaense_denovo_367	139	100	1	3521	3521	4821327	4824847	+	1
M. shigaense_denovo_366	35	100	1	461	461	4820838	4821298	+	1
M. shigaense_denovo_363	30	100	1	78	78	4820082	4820159	+	1
M. shigaense_denovo_362	85	100	1	2154	2154	4817737	4819890	+	1
M. shigaense_denovo_4614	53	100	1	801	801	3024295	3025095	+	1
M. shigaense_denovo_4610	29	100	1	101	101	3022158	3022258	+	1
M. shigaense_denovo_4611	29	100	1	81	81	3022260	3022340	+	1
M. shigaense_denovo_4612	38	100	1	379	379	3022438	3022816	+	1
M. shigaense_denovo_4613	35	100	1	857	857	3022909	3023765	+	1
M. shigaense_denovo_6680	28	100	1	100	100	3044178	3044277	+	1
M. shigaense_denovo_6683	40	100	1	831	831	3046201	3047031	+	1
M. shigaense_denovo_7839	37	100	1	732	732	2608247	2608978	+	1
M. shigaense_denovo_6682	39	100	1	1804	1804	3044388	3046191	+	1
M. shigaense_denovo_101	29	100	1	89	89	3271832	3271920	+	1
M. shigaense_denovo_100	32	100	1	252	252	4535392	4535643	+	1
M. shigaense_denovo_103	5693	100	0.999353	3088	3090	3272762	3275849	+	1
M. shigaense_denovo_102	63	100	1	665	665	3272022	3272686	+	1
M. shigaense_denovo_3068	29	100	1	56	56	2842482	2842537	+	1
M. shigaense_denovo_3069	43	100	1	310	310	2842564	2842873	+	1
M. shigaense_denovo_3398	81	100	1	3474	3474	1767161	1770634	+	1
M. shigaense_denovo_3399	160	100	1	3157	3157	1770755	1773911	+	1
M. shigaense_denovo_3397	35	100	1	191	191	1766864	1767054	+	1
M. shigaense_denovo_2629	29	100	1	67	67	4434404	4434470	+	1
M. shigaense_denovo_2628	34	100	1	317	317	4433966	4434282	+	1
M. shigaense_denovo_2622	92	100	1	3548	3548	1935669	1939216	+	1
M. shigaense_denovo_2621	54	100	1	1678	1678	1933987	1935664	+	1
M. shigaense_denovo_2620	71	100	1	3015	3015	1930963	1933977	+	1
M. shigaense_denovo_2627	78	100	1	2446	2446	4431502	4433947	+	1
M. shigaense_denovo_2626	29	100	1	67	67	4431433	4431499	+	1
M. shigaense_denovo_2625	74	100	1	1192	1192	4430132	4431323	+	1
M. shigaense_denovo_3938	29	100	1	62	62	2532100	2532161	+	1
M. shigaense_denovo_3939	34	100	1	212	212	2533002	2533213	+	1
M. shigaense_denovo_3934	29	100	1	64	64	2527646	2527709	+	1
M. shigaense_denovo_3935	61	100	1	968	968	2527738	2528705	+	1
M. shigaense_denovo_3936	46	100	1	2227	2227	2528718	2530944	+	1
M. shigaense_denovo_3937	52	100	1	896	896	2531083	2531978	+	1
M. shigaense_denovo_3930	108	100	1	4273	4273	2517577	2521849	+	1
M. shigaense_denovo_3931	51	100	1	3293	3293	2522023	2525315	+	1
M. shigaense_denovo_3932	61	100	1	633	633	2525408	2526040	+	1
M. shigaense_denovo_3933	60	100	1	1375	1375	2526224	2527598	+	1
M. shigaense_denovo_5398	30	100	1	95	95	94673	94767	+	1
M. shigaense_denovo_5399	51	100	1	1542	1542	94956	96497	+	1
M. shigaense_denovo_5396	33	100	1	168	168	93567	93734	+	1
M. shigaense_denovo_5397	39	100	1	669	669	93773	94441	+	1
M. shigaense_denovo_5394	32	100	1	249	249	93077	93325	+	1
M. shigaense_denovo_5395	30	100	1	80	80	93342	93421	+	1
M. shigaense_denovo_4377	45	100	1	2083	2083	4723381	4725463	+	1
M. shigaense_denovo_4379	47	100	1	414	414	4726144	4726557	+	1
M. shigaense_denovo_4378	30	100	1	133	133	4725776	4725908	+	1
M. shigaense_denovo_5576	42	100	1	506	506	3945786	3946291	+	1
M. shigaense_denovo_5577	29	100	1	66	66	3946305	3946370	+	1
M. shigaense_denovo_5574	33	100	1	476	476	3944975	3945450	+	1
M. shigaense_denovo_5575	29	100	1	183	183	3945461	3945643	+	1
M. shigaense_denovo_5572	34	100	1	170	170	3943946	3944115	+	1
M. shigaense_denovo_5573	37	100	1	419	419	3944136	3944554	+	1
M. shigaense_denovo_5570	43	100	1	1071	1071	3942125	3943195	+	1
M. shigaense_denovo_5571	30	100	1	61	61	3943380	3943440	+	1
M. shigaense_denovo_5579	54	100	1	3060	3060	3949804	3952863	+	1
M. shigaense_denovo_1473	581	100	1	875	875	676042	676916	+	1
M. shigaense_denovo_1472	70	100	1	3367	3367	672555	675921	+	1
M. shigaense_denovo_1471	60	100	1	1260	1260	671207	672466	+	1
M. shigaense_denovo_1470	32	100	1	315	315	670267	670581	+	1
M. shigaense_denovo_1477	78	100	1	3731	3731	1640425	1644155	+	1
M. shigaense_denovo_1476	29	100	1	54	54	1640367	1640420	+	1
M. shigaense_denovo_1475	134	100	1	2486	2486	1637823	1640308	+	1
M. shigaense_denovo_1474	63	100	1	1234	1234	1636558	1637791	+	1
M. shigaense_denovo_1479	32	100	1	230	230	1644849	1645078	+	1
M. shigaense_denovo_1478	38	100	1	644	644	1644169	1644812	+	1
M. shigaense_denovo_827	30	100	1	99	99	4193693	4193791	+	1
M. shigaense_denovo_828	30	100	1	97	97	4193824	4193920	+	1
M. shigaense_denovo_829	35	100	1	601	601	4193983	4194583	+	1
M. shigaense_denovo_1895	49	100	1	2654	2654	4473810	4476463	+	1
M. shigaense_denovo_1894	30	100	1	144	144	4473579	4473722	+	1
M. shigaense_denovo_1897	42	100	1	726	726	4478570	4479295	+	1
M. shigaense_denovo_1896	62	100	1	1920	1920	4476531	4478450	+	1
M. shigaense_denovo_1891	41	100	1	749	749	4471726	4472474	+	1
M. shigaense_denovo_1890	43	100	1	1195	1195	4470513	4471707	+	1
M. shigaense_denovo_1893	29	100	1	102	102	4473377	4473478	+	1
M. shigaense_denovo_1892	30	100	1	167	167	4473102	4473268	+	1
M. shigaense_denovo_1899	38	100	1	640	640	4480033	4480672	+	1
M. shigaense_denovo_1898	30	100	1	139	139	4479739	4479877	+	1
M. shigaense_denovo_6269	29	100	1	52	52	3967091	3967142	+	1
M. shigaense_denovo_6268	39	100	1	640	640	3966394	3967033	+	1
M. shigaense_denovo_6267	30	100	1	149	149	3966243	3966391	+	1
M. shigaense_denovo_6266	30	100	1	145	145	3966096	3966240	+	1
M. shigaense_denovo_6265	30	100	1	264	264	3965760	3966023	+	1
M. shigaense_denovo_6264	44	100	1	1643	1643	3963951	3965593	+	1
M. shigaense_denovo_6263	51	100	1	1846	1846	3961950	3963795	+	1
M. shigaense_denovo_6262	50	100	1	560	560	3961380	3961939	+	1
M. shigaense_denovo_6261	29	100	1	50	50	3961298	3961347	+	1
M. shigaense_denovo_6260	41	100	1	1130	1130	3960113	3961242	+	1
M. shigaense_denovo_6492	56	100	1	1275	1275	1432557	1433831	+	1
M. shigaense_denovo_6498	41	100	1	267	267	4765453	4765719	+	1
M. shigaense_denovo_6499	61	100	1	2254	2254	4765747	4768000	+	1
M. shigaense_denovo_642	36	100	1	266	266	1322538	1322803	+	1
M. shigaense_denovo_643	39	100	1	539	539	1322808	1323346	+	1
M. shigaense_denovo_640	29	100	1	150	150	1321379	1321528	+	1
M. shigaense_denovo_641	42	100	1	772	772	1321710	1322481	+	1
M. shigaense_denovo_646	101	100	1	804	804	1324334	1325137	+	1
M. shigaense_denovo_644	42	100	1	285	285	1323516	1323800	+	1
M. shigaense_denovo_645	38	100	1	442	442	1323832	1324273	+	1
M. shigaense_denovo_648	37	100	1	447	447	1330722	1331168	+	1
M. shigaense_denovo_649	30	100	1	187	187	1331205	1331391	+	1
M. shigaense_denovo_3233	40	100	1	1498	1498	3728753	3730250	+	1
M. shigaense_denovo_3232	104	100	1	984	984	3727611	3728594	+	1
M. shigaense_denovo_3237	35	100	1	302	302	3733063	3733364	+	1
M. shigaense_denovo_3236	31	100	1	342	342	3732713	3733054	+	1
M. shigaense_denovo_3235	29	100	1	176	176	3732429	3732604	+	1
M. shigaense_denovo_3234	48	100	1	2000	2000	3730252	3732251	+	1
M. shigaense_denovo_3239	40	100	1	519	519	3733959	3734477	+	1
M. shigaense_denovo_3238	33	100	1	244	244	3733535	3733778	+	1
M. shigaense_denovo_5769	62	100	1	941	941	5174457	5175397	+	1
M. shigaense_denovo_5768	34	100	1	266	266	5173349	5173614	+	1
M. shigaense_denovo_5763	29	100	1	97	97	5171279	5171375	+	1
M. shigaense_denovo_5762	41	100	1	571	571	5170688	5171258	+	1
M. shigaense_denovo_5761	30	100	1	76	76	5170590	5170665	+	1
M. shigaense_denovo_5760	44	100	1	353	353	5170217	5170569	+	1
M. shigaense_denovo_5767	36	100	1	681	681	5172644	5173324	+	1
M. shigaense_denovo_5766	29	100	1	58	58	5172564	5172621	+	1
M. shigaense_denovo_5765	30	100	1	184	184	5172362	5172545	+	1
M. shigaense_denovo_5764	33	100	1	347	347	5171874	5172220	+	1
M. shigaense_denovo_8591	47	100	1	334	334	2906628	2906961	+	1
M. shigaense_denovo_8590	37	100	1	621	621	2905920	2906540	+	1
M. shigaense_denovo_6814	41	100	1	299	299	2126197	2126495	+	1
M. shigaense_denovo_6815	40	100	1	730	730	2126726	2127455	+	1
M. shigaense_denovo_6816	77	100	1	581	581	2127677	2128257	+	1
M. shigaense_denovo_6817	38	100	1	309	309	3378712	3379020	+	1
M. shigaense_denovo_6810	69	100	1	763	763	1961324	1962086	+	1
M. shigaense_denovo_6811	30	100	1	127	127	2124974	2125100	+	1
M. shigaense_denovo_6812	31	100	1	347	347	2125302	2125648	+	1
M. shigaense_denovo_5183	41	100	1	410	410	3405919	3406328	+	1
M. shigaense_denovo_5182	31	100	1	133	133	3405782	3405914	+	1
M. shigaense_denovo_5181	36	100	1	358	358	3405354	3405711	+	1
M. shigaense_denovo_5180	52	100	1	4540	4540	3400464	3405003	+	1
M. shigaense_denovo_1649	34	100	1	413	413	2548194	2548606	+	1
M. shigaense_denovo_1640	37	100	1	393	393	4624325	4624717	+	1
M. shigaense_denovo_7542	35	100	1	249	249	4190107	4190355	+	1
M. shigaense_denovo_2397	135	100	1	1607	1607	4344771	4346377	+	1
M. shigaense_denovo_5987	28	100	1	149	149	22957	23105	+	1
M. shigaense_denovo_5986	28	100	1	62	62	22781	22842	+	1
M. shigaense_denovo_5985	31	100	1	208	208	22563	22770	+	1
M. shigaense_denovo_5984	49	100	1	824	824	21614	22437	+	1
M. shigaense_denovo_5983	66	100	1	772	772	20840	21611	+	1
M. shigaense_denovo_5982	74	100	1	1812	1812	1516920	1518731	+	1
M. shigaense_denovo_5981	51	100	1	326	326	1516433	1516758	+	1
M. shigaense_denovo_5989	51	100	1	3035	3035	23668	26702	+	1
M. shigaense_denovo_5988	41	100	1	518	518	23148	23665	+	1
M. shigaense_denovo_2396	43	100	1	466	466	4344077	4344542	+	1
M. shigaense_denovo_6634	34	100	1	196	196	3813112	3813307	+	1
M. shigaense_denovo_6635	51	100	1	824	824	3813653	3814476	+	1
M. shigaense_denovo_8441	45	100	1	500	500	1501082	1501581	+	1
M. shigaense_denovo_5656	35	100	1	263	263	3377575	3377837	+	1
M. shigaense_denovo_6630	31	100	1	106	106	3811858	3811963	+	1
M. shigaense_denovo_5655	30	100	1	167	167	3377356	3377522	+	1
M. shigaense_denovo_5654	29	100	1	204	204	3376767	3376970	+	1
M. shigaense_denovo_4588	43	100	1	343	343	3011415	3011757	+	1
M. shigaense_denovo_4589	30	100	1	107	107	3011766	3011872	+	1
M. shigaense_denovo_4586	70	100	1	508	508	2502642	2503149	+	1
M. shigaense_denovo_4587	33	100	1	236	236	2503324	2503559	+	1
M. shigaense_denovo_5651	30	100	1	62	62	3374725	3374786	+	1
M. shigaense_denovo_8449	39	100	1	464	464	1505043	1505506	+	1
M. shigaense_denovo_5650	29	100	1	135	135	3374536	3374670	+	1
M. shigaense_denovo_8448	29	100	1	61	61	1504952	1505012	+	1
M. shigaense_denovo_1529	34	100	1	195	195	3194910	3195104	+	1
M. shigaense_denovo_349	29	100	1	58	58	198703	198760	+	1
M. shigaense_denovo_348	34	100	1	256	256	198007	198262	+	1
M. shigaense_denovo_347	28	100	1	55	55	197826	197880	+	1
M. shigaense_denovo_346	30	100	1	113	113	197697	197809	+	1
M. shigaense_denovo_345	35	100	1	264	264	197132	197395	+	1
M. shigaense_denovo_344	38	100	1	576	576	196519	197094	+	1
M. shigaense_denovo_343	29	100	1	50	50	196393	196442	+	1
M. shigaense_denovo_342	34	100	1	466	466	195921	196386	+	1
M. shigaense_denovo_341	31	100	1	160	160	195650	195809	+	1
M. shigaense_denovo_340	37	100	1	263	263	194993	195255	+	1
M. shigaense_denovo_4636	103	100	1	746	746	1830511	1831256	+	1
M. shigaense_denovo_4637	67	100	1	1003	1003	4924457	4925459	+	1
M. shigaense_denovo_4634	28	100	1	83	83	1829557	1829639	+	1
M. shigaense_denovo_4635	41	100	1	849	849	1829653	1830501	+	1
M. shigaense_denovo_4632	61	100	1	854	854	1828000	1828853	+	1
M. shigaense_denovo_4633	37	100	1	530	530	1828855	1829384	+	1
M. shigaense_denovo_4630	28	100	1	59	59	1823943	1824001	+	1
M. shigaense_denovo_4631	66	100	1	3927	3927	1824019	1827945	+	1
M. shigaense_denovo_4638	33	100	1	268	268	4925850	4926117	+	1
M. shigaense_denovo_4639	45	100	1	1271	1271	3831265	3832535	+	1
M. shigaense_denovo_7581	30	100	1	52	52	1526498	1526549	+	1
M. shigaense_denovo_7583	49	100	1	1147	1147	1528910	1530056	+	1
M. shigaense_denovo_7582	57	100	1	2223	2223	1526611	1528833	+	1
M. shigaense_denovo_7585	30	100	1	87	87	1530762	1530848	+	1
M. shigaense_denovo_7584	51	100	1	662	662	1530067	1530728	+	1
M. shigaense_denovo_7587	36	100	1	682	682	1531401	1532082	+	1
M. shigaense_denovo_1520	35	100	1	309	309	2824208	2824516	+	1
M. shigaense_denovo_7588	31	100	1	156	156	2297942	2298097	+	1
M. shigaense_denovo_6670	32	100	1	437	437	3033451	3033887	+	1
M. shigaense_denovo_6674	66	100	1	527	527	3036967	3037493	+	1
M. shigaense_denovo_6675	54	100	1	572	572	3037528	3038099	+	1
M. shigaense_denovo_6676	34	100	1	391	391	3038153	3038543	+	1
M. shigaense_denovo_3045	130	100	1	1240	1240	823911	825150	+	1
M. shigaense_denovo_1527	34	100	1	191	191	3193158	3193348	+	1
M. shigaense_denovo_3514	60	100	1	1893	1893	4002288	4004180	+	1
M. shigaense_denovo_3746	29	100	1	50	50	665224	665273	+	1
M. shigaense_denovo_6188	34	100	1	265	265	2193833	2194097	+	1
M. shigaense_denovo_6189	40	100	1	384	384	2194104	2194487	+	1
M. shigaense_denovo_6186	39	100	1	1673	1673	2191792	2193464	+	1
M. shigaense_denovo_6187	39	100	1	288	288	2193544	2193831	+	1
M. shigaense_denovo_6184	40	100	1	1266	1266	2190403	2191668	+	1
M. shigaense_denovo_6185	30	100	1	71	71	2191714	2191784	+	1
M. shigaense_denovo_6183	30	100	1	131	131	2190271	2190401	+	1
M. shigaense_denovo_2605	45	100	1	1042	1042	482301	483342	+	1
M. shigaense_denovo_2604	37	100	1	534	534	481660	482193	+	1
M. shigaense_denovo_2607	63	100	1	290	290	484024	484313	+	1
M. shigaense_denovo_2606	49	100	1	608	608	483387	483994	+	1
M. shigaense_denovo_2601	40	100	1	554	554	477589	478142	+	1
M. shigaense_denovo_2600	29	100	1	152	152	477056	477207	+	1
M. shigaense_denovo_2603	29	100	1	53	53	481584	481636	+	1
M. shigaense_denovo_2609	41	100	1	503	503	283166	283668	+	1
M. shigaense_denovo_2608	29	100	1	84	84	283042	283125	+	1
M. shigaense_denovo_2359	30	100	1	66	66	4576979	4577044	+	1
M. shigaense_denovo_2358	28	100	1	57	57	4576658	4576714	+	1
M. shigaense_denovo_98	44	100	1	321	321	4533975	4534295	+	1
M. shigaense_denovo_99	29	100	1	125	125	4535071	4535195	+	1
M. shigaense_denovo_1189	31	100	1	206	206	347770	347975	+	1
M. shigaense_denovo_1188	36	100	1	590	590	347106	347695	+	1
M. shigaense_denovo_5691	34	100	1	366	366	4607134	4607499	+	1
M. shigaense_denovo_4133	32	100	1	301	301	4927050	4927350	+	1
M. shigaense_denovo_4132	39	100	1	398	398	4926644	4927041	+	1
M. shigaense_denovo_7118	31	100	1	245	245	3920927	3921171	+	1
M. shigaense_denovo_7112	28	100	1	50	50	3917551	3917600	+	1
M. shigaense_denovo_7113	31	100	1	152	152	3917655	3917806	+	1
M. shigaense_denovo_7111	48	100	1	636	636	3916841	3917476	+	1
M. shigaense_denovo_7116	38	100	1	525	525	3920084	3920608	+	1
M. shigaense_denovo_7117	38	100	1	262	262	3920651	3920912	+	1
M. shigaense_denovo_7114	58	100	1	1156	1156	3918265	3919420	+	1
M. shigaense_denovo_7115	35	100	1	552	552	3919529	3920080	+	1
M. shigaense_denovo_8131	48	100	1	534	534	1375052	1375585	+	1
M. shigaense_denovo_8130	30	100	1	316	316	1374473	1374788	+	1
M. shigaense_denovo_8133	30	100	1	129	129	1376239	1376367	+	1
M. shigaense_denovo_8132	32	100	1	248	248	1375974	1376221	+	1
M. shigaense_denovo_8135	35	100	1	317	317	1376611	1376927	+	1
M. shigaense_denovo_8134	34	100	1	225	225	1376370	1376594	+	1
M. shigaense_denovo_8137	31	100	1	195	195	1377589	1377783	+	1
M. shigaense_denovo_8136	37	100	1	300	300	1377176	1377475	+	1
M. shigaense_denovo_6865	37	100	1	911	911	4970189	4971099	+	1
M. shigaense_denovo_6867	39	100	1	863	863	4971484	4972346	+	1
M. shigaense_denovo_6866	31	100	1	190	190	4971146	4971335	+	1
M. shigaense_denovo_6869	33	100	1	373	373	4972436	4972808	+	1
M. shigaense_denovo_6868	30	100	1	50	50	4972348	4972397	+	1
M. shigaense_denovo_800	30	100	1	61	61	2604745	2604805	+	1
M. shigaense_denovo_801	28	100	1	74	74	2604818	2604891	+	1
M. shigaense_denovo_802	43	100	1	2649	2649	2605171	2607819	+	1
M. shigaense_denovo_803	30	100	1	143	143	2607833	2607975	+	1
M. shigaense_denovo_3412	30	100	1	117	117	1537201	1537317	+	1
M. shigaense_denovo_6249	63	100	1	1293	1293	109406	110698	+	1
M. shigaense_denovo_6248	45	100	1	907	907	108482	109388	+	1
M. shigaense_denovo_6240	38	100	1	280	280	3398485	3398764	+	1
M. shigaense_denovo_6243	31	100	1	122	122	1108167	1108288	+	1
M. shigaense_denovo_6245	39	100	1	931	931	1110216	1111146	+	1
M. shigaense_denovo_6244	50	100	1	1877	1877	1108318	1110194	+	1
M. shigaense_denovo_6247	50	100	1	1010	1010	107459	108468	+	1
M. shigaense_denovo_6246	45	100	1	648	648	106739	107386	+	1
M. shigaense_denovo_7851	32	100	1	158	158	3744988	3745145	+	1
M. shigaense_denovo_1154	371	100	1	390	390	1630702	1631091	+	1
M. shigaense_denovo_3749	38	100	1	370	370	667659	668028	+	1
M. shigaense_denovo_3748	46	100	1	1021	1021	666272	667292	+	1
M. shigaense_denovo_3219	30	100	1	58	58	4037232	4037289	+	1
M. shigaense_denovo_3218	34	100	1	273	273	4036933	4037205	+	1
M. shigaense_denovo_1155	44	100	1	2043	2043	1631360	1633402	+	1
M. shigaense_denovo_3215	47	100	1	662	662	4033432	4034093	+	1
M. shigaense_denovo_3214	67	100	1	493	493	4032931	4033423	+	1
M. shigaense_denovo_3741	38	100	1	503	503	657275	657777	+	1
M. shigaense_denovo_3740	107	100	1	2129	2129	655086	657214	+	1
M. shigaense_denovo_3747	30	100	1	164	164	665636	665799	+	1
M. shigaense_denovo_1156	34	100	1	194	194	1633418	1633611	+	1
M. shigaense_denovo_3213	64	100	1	1475	1475	4031430	4032904	+	1
M. shigaense_denovo_3744	30	100	1	97	97	664142	664238	+	1
M. shigaense_denovo_1157	53	100	1	1056	1056	1633619	1634674	+	1
M. shigaense_denovo_4306	36	100	1	314	314	3091288	3091601	+	1
M. shigaense_denovo_4307	33	100	1	336	336	3091715	3092050	+	1
M. shigaense_denovo_1152	67	100	1	2391	2391	1626007	1628397	+	1
M. shigaense_denovo_1153	111	100	1	2267	2267	1628430	1630696	+	1
M. shigaense_denovo_5795	29	100	1	52	52	1605192	1605243	+	1
M. shigaense_denovo_5792	30	100	1	128	128	1383593	1383720	+	1
M. shigaense_denovo_2393	60	100	1	5746	5746	4337706	4343451	+	1
M. shigaense_denovo_8308	48	100	1	535	535	3830456	3830990	+	1
M. shigaense_denovo_2392	38	100	1	717	717	4336593	4337309	+	1
M. shigaense_denovo_2391	38	100	1	674	674	4335859	4336532	+	1
M. shigaense_denovo_5793	30	100	1	174	174	1384140	1384313	+	1
M. shigaense_denovo_2390	61	100	1	3695	3695	4332105	4335799	+	1
M. shigaense_denovo_2168	46	100	1	1071	1071	806233	807303	+	1
M. shigaense_denovo_2169	115	100	1	3663	3663	807305	810967	+	1
M. shigaense_denovo_8307	28	100	1	75	75	3830369	3830443	+	1
M. shigaense_denovo_2164	31	100	1	227	227	800624	800850	+	1
M. shigaense_denovo_2165	51	100	1	767	767	800864	801630	+	1
M. shigaense_denovo_2166	35	100	1	197	197	801922	802118	+	1
M. shigaense_denovo_2167	174	100	1	3997	3997	802124	806120	+	1
M. shigaense_denovo_2160	47	100	1	990	990	4647928	4648917	+	1
M. shigaense_denovo_2161	40	100	1	351	351	4648977	4649327	+	1
M. shigaense_denovo_2162	36	100	1	769	769	799012	799780	+	1
M. shigaense_denovo_2163	66	100	1	680	680	799874	800553	+	1
M. shigaense_denovo_2395	29	100	1	76	76	4343912	4343987	+	1
M. shigaense_denovo_2394	35	100	1	344	344	4343504	4343847	+	1
M. shigaense_denovo_1660	36	100	1	305	305	424131	424435	+	1
M. shigaense_denovo_1661	135	100	1	3280	3280	424662	427941	+	1
M. shigaense_denovo_4830	32	100	1	256	256	4055119	4055374	+	1
M. shigaense_denovo_4831	29	100	1	224	224	4055579	4055802	+	1
M. shigaense_denovo_4832	40	100	1	874	874	4055805	4056678	+	1
M. shigaense_denovo_4838	68	100	1	1219	1219	2885635	2886853	+	1
M. shigaense_denovo_4839	62	100	1	1917	1917	2887000	2888916	+	1
M. shigaense_denovo_4650	41	100	1	849	849	4543215	4544063	+	1
M. shigaense_denovo_4651	30	100	1	209	209	4544228	4544436	+	1
M. shigaense_denovo_4652	29	100	1	55	55	4544468	4544522	+	1
M. shigaense_denovo_4653	42	100	1	326	326	4544524	4544849	+	1
M. shigaense_denovo_4654	32	100	1	178	178	4544851	4545028	+	1
M. shigaense_denovo_4655	33	100	1	247	247	521977	522223	+	1
M. shigaense_denovo_4656	31	100	1	198	198	522308	522505	+	1
M. shigaense_denovo_4657	93	100	1	1763	1763	522548	524310	+	1
M. shigaense_denovo_7879	53	100	1	292	292	2587356	2587647	+	1
M. shigaense_denovo_7878	31	100	1	307	307	2586877	2587183	+	1
M. shigaense_denovo_7875	34	100	1	375	375	2586250	2586624	+	1
M. shigaense_denovo_7877	30	100	1	102	102	2586766	2586867	+	1
M. shigaense_denovo_7876	29	100	1	54	54	2586693	2586746	+	1
M. shigaense_denovo_5736	38	100	1	608	608	2136198	2136805	+	1
M. shigaense_denovo_3022	85	100	1	2485	2485	1808339	1810823	+	1
M. shigaense_denovo_3023	31	100	1	155	155	1811077	1811231	+	1
M. shigaense_denovo_3020	30	100	1	184	184	1807897	1808080	+	1
M. shigaense_denovo_3021	32	100	1	130	130	1808152	1808281	+	1
M. shigaense_denovo_3024	32	100	1	97	97	1811468	1811564	+	1
M. shigaense_denovo_5730	36	100	1	1130	1130	2133148	2134277	+	1
M. shigaense_denovo_5731	36	100	1	434	434	2134509	2134942	+	1
M. shigaense_denovo_5732	31	100	1	168	168	2134948	2135115	+	1
M. shigaense_denovo_6804	31	100	1	247	247	1958137	1958383	+	1
M. shigaense_denovo_5733	29	100	1	77	77	2135263	2135339	+	1
M. shigaense_denovo_6476	28	100	1	62	62	2067988	2068049	+	1
M. shigaense_denovo_6477	30	100	1	212	212	2068052	2068263	+	1
M. shigaense_denovo_6474	36	100	1	678	678	2066670	2067347	+	1
M. shigaense_denovo_6475	35	100	1	357	357	2067418	2067774	+	1
M. shigaense_denovo_6472	39	100	1	1379	1379	4308178	4309556	+	1
M. shigaense_denovo_6473	80	100	1	4602	4602	2062006	2066607	+	1
M. shigaense_denovo_980	31	100	1	280	280	2680426	2680705	+	1
M. shigaense_denovo_983	37	100	1	414	414	2682657	2683070	+	1
M. shigaense_denovo_982	56	100	1	1593	1593	2681063	2682655	+	1
M. shigaense_denovo_7309	42	100	1	1132	1132	1667027	1668158	+	1
M. shigaense_denovo_7308	29	100	1	68	68	1666939	1667006	+	1
M. shigaense_denovo_7307	35	100	1	811	811	1665796	1666606	+	1
M. shigaense_denovo_7305	29	100	1	103	103	1664400	1664502	+	1
M. shigaense_denovo_8250	34	100	1	272	272	3303985	3304256	+	1
M. shigaense_denovo_3686	34	100	1	487	487	74785	75271	+	1
M. shigaense_denovo_3687	30	100	1	92	92	75530	75621	+	1
M. shigaense_denovo_3684	31	100	1	268	268	73630	73897	+	1
M. shigaense_denovo_3685	44	100	1	503	503	74166	74668	+	1
M. shigaense_denovo_3682	36	100	1	208	208	72827	73034	+	1
M. shigaense_denovo_3683	34	100	1	354	354	73038	73391	+	1
M. shigaense_denovo_3680	52	100	1	2687	2687	68721	71407	+	1
M. shigaense_denovo_3681	46	100	1	1068	1068	71645	72712	+	1
M. shigaense_denovo_3688	40	100	1	705	705	75655	76359	+	1
M. shigaense_denovo_3689	31	100	1	195	195	76436	76630	+	1
M. shigaense_denovo_2371	38	100	1	814	814	4587036	4587849	+	1
M. shigaense_denovo_2370	34	100	1	282	282	4586614	4586895	+	1
M. shigaense_denovo_2373	35	100	1	271	271	4589339	4589609	+	1
M. shigaense_denovo_2372	37	100	1	311	311	4588074	4588384	+	1
M. shigaense_denovo_2375	31	100	1	156	156	4589948	4590103	+	1
M. shigaense_denovo_2374	32	100	1	294	294	4589648	4589941	+	1
M. shigaense_denovo_2377	43	100	1	1235	1235	4309877	4311111	+	1
M. shigaense_denovo_2376	34	100	1	901	901	4590713	4591613	+	1
M. shigaense_denovo_2379	44	100	1	1014	1014	4311437	4312450	+	1
M. shigaense_denovo_2378	31	100	1	266	266	4311114	4311379	+	1
M. shigaense_denovo_5143	80	100	1	353	353	2628200	2628552	+	1
M. shigaense_denovo_2883	34	100	1	250	250	5045096	5045345	+	1
M. shigaense_denovo_2882	45	100	1	2344	2344	5042320	5044663	+	1
M. shigaense_denovo_2881	29	100	1	52	52	5042266	5042317	+	1
M. shigaense_denovo_2880	42	100	1	280	280	5041897	5042176	+	1
M. shigaense_denovo_2887	30	100	1	167	167	2041754	2041920	+	1
M. shigaense_denovo_2886	54	100	1	267	267	2041321	2041587	+	1
M. shigaense_denovo_2885	44	100	1	641	641	2040369	2041009	+	1
M. shigaense_denovo_2884	108	100	1	2897	2897	2037378	2040274	+	1
M. shigaense_denovo_2889	35	100	1	236	236	2042461	2042696	+	1
M. shigaense_denovo_2888	49	100	1	342	342	2042026	2042367	+	1
M. shigaense_denovo_5358	29	100	1	134	134	3363591	3363724	+	1
M. shigaense_denovo_5359	39	100	1	1019	1019	3363877	3364895	+	1
M. shigaense_denovo_5357	36	100	1	408	408	3363179	3363586	+	1
M. shigaense_denovo_5687	50	100	1	1038	1038	4602157	4603194	+	1
M. shigaense_denovo_5688	60	100	1	3066	3066	4603291	4606356	+	1
M. shigaense_denovo_4896	40	100	1	369	369	2030355	2030723	+	1
M. shigaense_denovo_3722	29	100	1	69	69	241340	241408	+	1
M. shigaense_denovo_5828	45	100	1	726	726	4409191	4409916	+	1
M. shigaense_denovo_5829	30	100	1	53	53	4409980	4410032	+	1
M. shigaense_denovo_5824	34	100	1	177	177	4406385	4406561	+	1
M. shigaense_denovo_5825	29	100	1	145	145	4406724	4406868	+	1
M. shigaense_denovo_5826	29	100	1	203	203	4407065	4407267	+	1
M. shigaense_denovo_5827	46	100	1	1499	1499	4407641	4409139	+	1
M. shigaense_denovo_5820	39	100	1	323	323	4404532	4404854	+	1
M. shigaense_denovo_5821	29	100	1	87	87	4405123	4405209	+	1
M. shigaense_denovo_5822	30	100	1	138	138	4405223	4405360	+	1
M. shigaense_denovo_5823	32	100	1	602	602	4405478	4406079	+	1
M. shigaense_denovo_6223	38	100	1	384	384	3389350	3389733	+	1
M. shigaense_denovo_6222	36	100	1	273	273	3389068	3389340	+	1
M. shigaense_denovo_6221	29	100	1	61	61	3389000	3389060	+	1
M. shigaense_denovo_6220	34	100	1	455	455	3388542	3388996	+	1
M. shigaense_denovo_6227	30	100	1	209	209	3390641	3390849	+	1
M. shigaense_denovo_6226	35	100	1	455	455	3390016	3390470	+	1
M. shigaense_denovo_6225	29	100	1	51	51	3389902	3389952	+	1
M. shigaense_denovo_6224	35	100	1	159	159	3389738	3389896	+	1
M. shigaense_denovo_6229	32	100	1	96	96	3391180	3391275	+	1
M. shigaense_denovo_6228	31	100	1	240	240	3390851	3391090	+	1
M. shigaense_denovo_682	39	100	1	429	429	1277844	1278272	+	1
M. shigaense_denovo_680	91	100	1	1562	1562	1273162	1274723	+	1
M. shigaense_denovo_681	386	100	1	3058	3058	1274757	1277814	+	1
M. shigaense_denovo_3767	30	100	1	179	179	3413937	3414115	+	1
M. shigaense_denovo_3768	38	100	1	300	300	3414140	3414439	+	1
M. shigaense_denovo_7436	31	100	1	144	144	3087403	3087546	+	1
M. shigaense_denovo_6945	43	100	1	450	450	2642024	2642473	+	1
M. shigaense_denovo_2414	32	100	1	262	262	4369393	4369654	+	1
M. shigaense_denovo_2415	32	100	1	238	238	4369954	4370191	+	1
M. shigaense_denovo_2416	32	100	1	130	130	4370722	4370851	+	1
M. shigaense_denovo_2417	41	100	1	442	442	4592221	4592662	+	1
M. shigaense_denovo_2410	148	100	1	1637	1637	4363297	4364933	+	1
M. shigaense_denovo_2411	82	100	1	3441	3441	4364982	4368422	+	1
M. shigaense_denovo_2412	51	100	1	286	286	4368516	4368801	+	1
M. shigaense_denovo_2413	32	100	1	200	200	4369072	4369271	+	1
M. shigaense_denovo_8531	63	100	1	264	264	4278674	4278937	+	1
M. shigaense_denovo_2418	29	100	1	82	82	4592762	4592843	+	1
M. shigaense_denovo_2419	28	100	1	71	71	4593069	4593139	+	1
M. shigaense_denovo_2149	39	100	1	236	236	2510304	2510539	+	1
M. shigaense_denovo_6747	40	100	1	546	546	3287490	3288035	+	1
M. shigaense_denovo_1637	31	100	1	87	87	4619085	4619171	+	1
M. shigaense_denovo_6740	39	100	1	297	297	2295015	2295311	+	1
M. shigaense_denovo_6741	68	100	1	1842	1842	2622507	2624348	+	1
M. shigaense_denovo_6742	36	100	1	1041	1041	2624943	2625983	+	1
M. shigaense_denovo_4818	30	100	1	84	84	132775	132858	+	1
M. shigaense_denovo_4819	53	100	1	685	685	133178	133862	+	1
M. shigaense_denovo_4816	32	100	1	476	476	131901	132376	+	1
M. shigaense_denovo_4817	30	100	1	60	60	132698	132757	+	1
M. shigaense_denovo_4814	39	100	1	590	590	2636800	2637389	+	1
M. shigaense_denovo_4815	34	100	1	145	145	2637529	2637673	+	1
M. shigaense_denovo_4812	56	100	1	932	932	2634912	2635843	+	1
M. shigaense_denovo_4813	44	100	1	530	530	2636051	2636580	+	1
M. shigaense_denovo_4810	29	100	1	66	66	2634600	2634665	+	1
M. shigaense_denovo_4811	31	100	1	131	131	2634710	2634840	+	1
M. shigaense_denovo_8539	29	100	1	69	69	957323	957391	+	1
M. shigaense_denovo_8538	38	100	1	580	580	950306	950885	+	1
M. shigaense_denovo_303	34	100	1	329	329	2351473	2351801	+	1
M. shigaense_denovo_302	33	100	1	261	261	2350893	2351153	+	1
M. shigaense_denovo_300	30	100	1	153	153	2349255	2349407	+	1
M. shigaense_denovo_306	1794	100	1	223	223	4114534	4114756	+	1
M. shigaense_denovo_305	31	100	1	477	477	2352221	2352697	+	1
M. shigaense_denovo_304	33	100	1	295	295	2351911	2352205	+	1
M. shigaense_denovo_4672	81	99.896	1	1915	1915	3221130	3223044	+	1
M. shigaense_denovo_4673	32	100	1	90	90	3223273	3223362	+	1
M. shigaense_denovo_4674	28	100	1	69	69	3223370	3223438	+	1
M. shigaense_denovo_4675	34	100	1	299	299	3223498	3223796	+	1
M. shigaense_denovo_7897	31	100	1	71	71	4161383	4161453	+	1
M. shigaense_denovo_7896	38	100	1	1044	1044	4160284	4161327	+	1
M. shigaense_denovo_7895	42	100	1	1203	1203	4159063	4160265	+	1
M. shigaense_denovo_7894	45	100	1	385	385	4158419	4158803	+	1
M. shigaense_denovo_7893	39	100	1	415	415	4483450	4483864	+	1
M. shigaense_denovo_7892	51	100	1	662	662	4482538	4483199	+	1
M. shigaense_denovo_7890	44	100	1	1169	1169	1094853	1096021	+	1
M. shigaense_denovo_7899	35	100	1	482	482	4161588	4162069	+	1
M. shigaense_denovo_7898	30	100	1	128	128	4161455	4161582	+	1
M. shigaense_denovo_7098	31	100	1	231	231	1368008	1368238	+	1
M. shigaense_denovo_7097	32	100	1	223	223	1366311	1366533	+	1
M. shigaense_denovo_7096	51	100	1	870	870	1365067	1365936	+	1
M. shigaense_denovo_7095	52	100	1	2208	2208	4528212	4530419	+	1
M. shigaense_denovo_7094	44	100	1	936	936	4526273	4527208	+	1
M. shigaense_denovo_7093	42	100	1	358	358	4525603	4525960	+	1
M. shigaense_denovo_7092	29	100	1	73	73	4525307	4525379	+	1
M. shigaense_denovo_7091	33	100	1	399	399	4524895	4525293	+	1
M. shigaense_denovo_7090	39	100	1	715	715	4523939	4524653	+	1
M. shigaense_denovo_6411	39	100	1	1061	1061	3071659	3072719	+	1
M. shigaense_denovo_6413	31	100	1	261	261	3674253	3674513	+	1
M. shigaense_denovo_6414	33	100	1	232	232	3674522	3674753	+	1
M. shigaense_denovo_6415	34	100	1	316	316	3674821	3675136	+	1
M. shigaense_denovo_6416	82	100	1	2059	2059	3675329	3677387	+	1
M. shigaense_denovo_7329	38	100	1	302	302	3785530	3785831	+	1
M. shigaense_denovo_7328	42	100	1	364	364	3785125	3785488	+	1
M. shigaense_denovo_7321	30	100	1	123	123	3781199	3781321	+	1
M. shigaense_denovo_7323	37	100	1	738	738	3781867	3782604	+	1
M. shigaense_denovo_7322	30	100	1	62	62	3781329	3781390	+	1
M. shigaense_denovo_7325	30	100	1	226	226	3783390	3783615	+	1
M. shigaense_denovo_7324	39	100	1	699	699	3782609	3783307	+	1
M. shigaense_denovo_7327	56	100	1	549	549	3784383	3784931	+	1
M. shigaense_denovo_7326	33	100	1	203	203	3784064	3784266	+	1
M. shigaense_denovo_2319	45	100	1	2303	2303	3260674	3262976	+	1
M. shigaense_denovo_2318	45	100	1	677	677	3259807	3260483	+	1
M. shigaense_denovo_2313	31	100	1	223	223	4993458	4993680	+	1
M. shigaense_denovo_2312	37	100	1	612	612	4992731	4993342	+	1
M. shigaense_denovo_2311	33	100	1	239	239	1839852	1840090	+	1
M. shigaense_denovo_2310	184	100	1	8375	8375	1831402	1839776	+	1
M. shigaense_denovo_3958	41	100	1	723	723	4716505	4717227	+	1
M. shigaense_denovo_3959	43	100	1	1949	1949	4717230	4719178	+	1
M. shigaense_denovo_3408	101	100	1	2986	2986	1532921	1535906	+	1
M. shigaense_denovo_3409	78	100	1	624	624	1535915	1536538	+	1
M. shigaense_denovo_3404	36	100	1	351	351	1776207	1776557	+	1
M. shigaense_denovo_3405	37	100	1	283	283	1776576	1776858	+	1
M. shigaense_denovo_3406	33	100	1	196	196	1777622	1777817	+	1
M. shigaense_denovo_3951	28	100	1	96	96	4707923	4708018	+	1
M. shigaense_denovo_3400	29	100	1	142	142	1773976	1774117	+	1
M. shigaense_denovo_3401	44	100	1	551	551	1774127	1774677	+	1
M. shigaense_denovo_3954	46	100	1	2792	2792	4713075	4715866	+	1
M. shigaense_denovo_3403	42	100	1	651	651	1775230	1775880	+	1
M. shigaense_denovo_4315	36	100	1	324	324	3094651	3094974	+	1
M. shigaense_denovo_1146	37	100	1	295	295	1620100	1620394	+	1
M. shigaense_denovo_1145	29	100	1	67	67	1619400	1619466	+	1
M. shigaense_denovo_1144	30	100	1	145	145	1619190	1619334	+	1
M. shigaense_denovo_4311	34	100	1	216	216	3093287	3093502	+	1
M. shigaense_denovo_4310	29	100	1	77	77	3092695	3092771	+	1
M. shigaense_denovo_4313	28	100	1	77	77	3094162	3094238	+	1
M. shigaense_denovo_1140	101	100	1	1377	1377	1613174	1614550	+	1
M. shigaense_denovo_4319	38	100	1	344	344	3097599	3097942	+	1
M. shigaense_denovo_4318	131	100	1	1540	1540	3095680	3097219	+	1
M. shigaense_denovo_1149	29	100	1	64	64	1623996	1624059	+	1
M. shigaense_denovo_1148	32	100	1	330	330	1623662	1623991	+	1
M. shigaense_denovo_5806	29	100	1	90	90	2901278	2901367	+	1
M. shigaense_denovo_5807	33	100	1	152	152	2901495	2901646	+	1
M. shigaense_denovo_5804	34	100	1	448	448	797250	797697	+	1
M. shigaense_denovo_5805	31	100	1	283	283	797701	797983	+	1
M. shigaense_denovo_5802	42	100	1	1874	1874	793982	795855	+	1
M. shigaense_denovo_5803	39	100	1	916	916	796229	797144	+	1
M. shigaense_denovo_5801	90	100	1	2434	2434	791547	793980	+	1
M. shigaense_denovo_5808	43	100	1	275	275	2901779	2902053	+	1
M. shigaense_denovo_1363	30	100	1	106	106	2138152	2138257	+	1
M. shigaense_denovo_1362	30	100	1	52	52	2138065	2138116	+	1
M. shigaense_denovo_1361	29	100	1	77	77	2137839	2137915	+	1
M. shigaense_denovo_1360	40	100	1	520	520	2137176	2137695	+	1
M. shigaense_denovo_1365	30	100	1	258	258	2144362	2144619	+	1
M. shigaense_denovo_1364	184	100	1	5807	5807	2138411	2144217	+	1
M. shigaense_denovo_1369	129	100	1	1606	1606	2150867	2152472	+	1
M. shigaense_denovo_1368	36	100	1	499	499	2150344	2150842	+	1
M. shigaense_denovo_7403	51	100	1	1589	1589	2711275	2712863	+	1
M. shigaense_denovo_7404	45	100	1	283	283	2712902	2713184	+	1
M. shigaense_denovo_7405	32	100	1	99	99	1154330	1154428	+	1
M. shigaense_denovo_7407	36	100	1	300	300	1155288	1155587	+	1
M. shigaense_denovo_7408	33	100	1	192	192	1155806	1155997	+	1
M. shigaense_denovo_7409	43	100	1	1498	1498	1156020	1157517	+	1
M. shigaense_denovo_8177	39	100	1	991	991	4284137	4285127	+	1
M. shigaense_denovo_8171	32	100	1	130	130	2296134	2296263	+	1
M. shigaense_denovo_8170	29	100	1	112	112	4122425	4122536	+	1
M. shigaense_denovo_8173	49	100	1	1894	1894	2019115	2021008	+	1
M. shigaense_denovo_8172	36	100	1	571	571	2018457	2019027	+	1
M. shigaense_denovo_844	44	100	1	699	699	4212632	4213330	+	1
M. shigaense_denovo_845	41	100	1	595	595	4213332	4213926	+	1
M. shigaense_denovo_846	31	100	1	221	221	4214037	4214257	+	1
M. shigaense_denovo_847	38	100	1	299	299	4214392	4214690	+	1
M. shigaense_denovo_840	41	100	1	755	755	4209169	4209923	+	1
M. shigaense_denovo_841	44	100	1	582	582	4209925	4210506	+	1
M. shigaense_denovo_842	63	100	1	1967	1967	4210526	4212492	+	1
M. shigaense_denovo_843	30	100	1	77	77	4212520	4212596	+	1
M. shigaense_denovo_6209	32	100	1	419	419	5193295	5193713	+	1
M. shigaense_denovo_6205	55	100	1	993	993	4951151	4952143	+	1
M. shigaense_denovo_6204	33	100	1	362	362	4950734	4951095	+	1
M. shigaense_denovo_6207	54	100	1	2610	2610	4953568	4956177	+	1
M. shigaense_denovo_6206	86	100	1	1326	1326	4952200	4953525	+	1
M. shigaense_denovo_6201	37	100	1	1535	1535	4948400	4949934	+	1
M. shigaense_denovo_6200	45	100	1	1812	1812	4946466	4948277	+	1
M. shigaense_denovo_6203	33	100	1	199	199	4950531	4950729	+	1
M. shigaense_denovo_6202	32	100	1	231	231	4950110	4950340	+	1
M. shigaense_denovo_518	332	100	1	3720	3720	2650078	2653797	+	1
M. shigaense_denovo_519	296	100	1	6772	6772	2207393	2214164	+	1
M. shigaense_denovo_8553	29	100	1	77	77	1689580	1689656	+	1
M. shigaense_denovo_375	103	100	0.953343	6273	6580	4833798	4840070	+	1
M. shigaense_denovo_370	35	100	1	583	583	4830155	4830737	+	1
M. shigaense_denovo_371	32	100	1	200	200	4830743	4830942	+	1
M. shigaense_denovo_378	46	100	1	2259	2259	4841922	4844180	+	1
M. shigaense_denovo_4600	28	100	1	94	94	3016314	3016407	+	1
M. shigaense_denovo_1969	29	100	1	76	76	172159	172234	+	1
M. shigaense_denovo_1968	40	100	1	419	419	171430	171848	+	1
M. shigaense_denovo_1961	28	100	1	86	86	166140	166225	+	1
M. shigaense_denovo_1960	44	100	1	920	920	165213	166132	+	1
M. shigaense_denovo_1963	54	100	1	405	405	167436	167840	+	1
M. shigaense_denovo_1962	39	100	1	903	903	166503	167405	+	1
M. shigaense_denovo_1965	36	100	1	1048	1048	168893	169940	+	1
M. shigaense_denovo_1964	28	100	1	80	80	168582	168661	+	1
M. shigaense_denovo_1967	43	100	1	519	519	170648	171166	+	1
M. shigaense_denovo_1966	32	100	1	214	214	170209	170422	+	1
M. shigaense_denovo_2599	29	100	1	61	61	476527	476587	+	1
M. shigaense_denovo_2598	29	100	1	130	130	476332	476461	+	1
M. shigaense_denovo_2438	30	100	1	126	126	1733121	1733246	+	1
M. shigaense_denovo_2439	45	100	1	518	518	1733388	1733905	+	1
M. shigaense_denovo_2436	31	100	1	250	250	1731899	1732148	+	1
M. shigaense_denovo_2437	40	100	1	545	545	1732530	1733074	+	1
M. shigaense_denovo_2434	75	100	1	1867	1867	1727410	1729276	+	1
M. shigaense_denovo_2435	65	100	1	2463	2463	1729295	1731757	+	1
M. shigaense_denovo_2432	37	100	1	387	387	1726655	1727041	+	1
M. shigaense_denovo_2433	33	100	1	239	239	1727130	1727368	+	1
M. shigaense_denovo_2431	30	100	1	128	128	1726492	1726619	+	1
M. shigaense_denovo_2520	30	100	1	119	119	413564	413682	+	1
M. shigaense_denovo_93	58	100	1	915	915	4530715	4531629	+	1
M. shigaense_denovo_94	44	100	1	839	839	4531661	4532499	+	1
M. shigaense_denovo_95	40	100	1	271	271	4532743	4533013	+	1
M. shigaense_denovo_96	36	100	1	284	284	4533070	4533353	+	1
M. shigaense_denovo_97	34	100	1	466	466	4533443	4533908	+	1
M. shigaense_denovo_4870	40	100	1	385	385	1283697	1284081	+	1
M. shigaense_denovo_4871	38	100	1	304	304	1284101	1284404	+	1
M. shigaense_denovo_4872	31	100	1	422	422	1284407	1284828	+	1
M. shigaense_denovo_4873	69	100	1	2478	2478	1284836	1287313	+	1
M. shigaense_denovo_4874	31	100	1	116	116	1287401	1287516	+	1
M. shigaense_denovo_8452	30	100	1	63	63	1506554	1506616	+	1
M. shigaense_denovo_8453	30	100	1	395	395	1506681	1507075	+	1
M. shigaense_denovo_5479	93	100	1	11506	11506	3750763	3762268	+	1
M. shigaense_denovo_5478	32	100	1	456	456	3750247	3750702	+	1
M. shigaense_denovo_5477	28	100	1	55	55	3749711	3749765	+	1
M. shigaense_denovo_5476	28	100	1	57	57	3749644	3749700	+	1
M. shigaense_denovo_5475	42	100	1	699	699	3748787	3749485	+	1
M. shigaense_denovo_5474	39	100	1	981	981	3747779	3748759	+	1
M. shigaense_denovo_5645	42	100	1	533	533	3367912	3368444	+	1
M. shigaense_denovo_2448	97	100	1	2928	2928	1748495	1751422	+	1
M. shigaense_denovo_4063	110	100	1	1313	1313	4896313	4897625	+	1
M. shigaense_denovo_8458	31	100	1	279	279	1508793	1509071	+	1
M. shigaense_denovo_8459	33	100	1	499	499	1509333	1509831	+	1
M. shigaense_denovo_2443	33	100	1	237	237	1736066	1736302	+	1
M. shigaense_denovo_2442	34	100	1	226	226	1735654	1735879	+	1
M. shigaense_denovo_981	28	100	1	70	70	2680971	2681040	+	1
M. shigaense_denovo_4696	50	100	1	1253	1253	4760050	4761302	+	1
M. shigaense_denovo_985	29	100	1	215	215	2683676	2683890	+	1
M. shigaense_denovo_984	37	100	1	224	224	2683215	2683438	+	1
M. shigaense_denovo_987	32	100	1	353	353	2684624	2684976	+	1
M. shigaense_denovo_986	32	100	1	518	518	2683947	2684464	+	1
M. shigaense_denovo_989	88	100	1	6205	6205	2685966	2692170	+	1
M. shigaense_denovo_988	36	100	1	408	408	2685086	2685493	+	1
M. shigaense_denovo_4061	33	100	1	186	186	4890483	4890668	+	1
M. shigaense_denovo_4012	58	100	1	448	448	1447525	1447972	+	1
M. shigaense_denovo_2444	89	100	1	7869	7869	1736428	1744296	+	1
M. shigaense_denovo_4010	64	100	1	1205	1205	1445474	1446678	+	1
M. shigaense_denovo_1531	488	100	1	557	557	3200512	3201068	+	1
M. shigaense_denovo_4060	47	100	1	1902	1902	4888534	4890435	+	1
M. shigaense_denovo_4067	35	100	1	346	346	4903722	4904067	+	1
M. shigaense_denovo_4066	29	100	1	76	76	4903305	4903380	+	1
M. shigaense_denovo_6433	30	100	1	182	182	833553	833734	+	1
M. shigaense_denovo_6430	32	100	1	172	172	832227	832398	+	1
M. shigaense_denovo_6431	29	100	1	86	86	833127	833212	+	1
M. shigaense_denovo_6436	30	100	1	209	209	834591	834799	+	1
M. shigaense_denovo_6434	28	100	1	60	60	833754	833813	+	1
M. shigaense_denovo_6435	37	100	1	260	260	833949	834208	+	1
M. shigaense_denovo_4065	30	100	1	113	113	4903105	4903217	+	1
M. shigaense_denovo_7343	56	100	1	366	366	1170946	1171311	+	1
M. shigaense_denovo_7342	47	100	1	834	834	1170070	1170903	+	1
M. shigaense_denovo_7341	55	100	1	1192	1192	1168811	1170002	+	1
M. shigaense_denovo_7347	29	100	1	101	101	1173582	1173682	+	1
M. shigaense_denovo_7346	38	100	1	893	893	1172519	1173411	+	1
M. shigaense_denovo_7345	31	100	1	157	157	1172355	1172511	+	1
M. shigaense_denovo_7344	46	100	1	780	780	1171427	1172206	+	1
M. shigaense_denovo_7349	53	100	1	2349	2349	1173996	1176344	+	1
M. shigaense_denovo_7348	29	100	1	89	89	1173684	1173772	+	1
M. shigaense_denovo_4064	87	100	1	5322	5322	4897774	4903095	+	1
M. shigaense_denovo_181	35	100	1	414	414	1923889	1924302	+	1
M. shigaense_denovo_180	38	100	1	784	784	1922925	1923708	+	1
M. shigaense_denovo_182	34	100	1	377	377	1924412	1924788	+	1
M. shigaense_denovo_4069	36	100	1	431	431	4905190	4905620	+	1
M. shigaense_denovo_728	50	100	1	1759	1759	3912040	3913798	+	1
M. shigaense_denovo_725	49	100	1	3534	3534	3907760	3911293	+	1
M. shigaense_denovo_724	30	100	1	124	124	3907550	3907673	+	1
M. shigaense_denovo_727	32	100	1	235	235	3911730	3911964	+	1
M. shigaense_denovo_726	38	100	1	343	343	3911301	3911643	+	1
M. shigaense_denovo_723	407	100	1	3895	3895	3903652	3907546	+	1
M. shigaense_denovo_2847	31	100	1	171	171	282411	282581	+	1
M. shigaense_denovo_2846	87	100	1	5039	5039	277215	282253	+	1
M. shigaense_denovo_2845	142	100	1	1291	1291	275827	277117	+	1
M. shigaense_denovo_2844	40	100	1	1123	1123	274669	275791	+	1
M. shigaense_denovo_2843	35	100	1	245	245	274386	274630	+	1
M. shigaense_denovo_2842	32	100	1	209	209	274112	274320	+	1
M. shigaense_denovo_2841	39	100	1	286	286	273803	274088	+	1
M. shigaense_denovo_2840	34	100	1	502	502	273225	273726	+	1
M. shigaense_denovo_2591	30	100	1	112	112	472923	473034	+	1
M. shigaense_denovo_2590	32	100	1	211	211	472704	472914	+	1
M. shigaense_denovo_2593	36	100	1	720	720	473919	474638	+	1
M. shigaense_denovo_2592	42	100	1	419	419	473331	473749	+	1
M. shigaense_denovo_2595	30	100	1	105	105	475227	475331	+	1
M. shigaense_denovo_2594	38	100	1	361	361	474728	475088	+	1
M. shigaense_denovo_5313	52	100	1	2201	2201	4850884	4853084	+	1
M. shigaense_denovo_5310	45	100	1	403	403	4845072	4845474	+	1
M. shigaense_denovo_5311	37	100	1	331	331	4845596	4845926	+	1
M. shigaense_denovo_5648	39	100	1	897	897	3373465	3374361	+	1
M. shigaense_denovo_5649	29	100	1	84	84	3374440	3374523	+	1
M. shigaense_denovo_3429	29	100	1	115	115	1014459	1014573	+	1
M. shigaense_denovo_1161	175	99.976	1	4175	4175	1253313	1257487	+	1
M. shigaense_denovo_1160	30	100	1	144	144	1636145	1636288	+	1
M. shigaense_denovo_1162	42	100	1	777	777	1257489	1258265	+	1
M. shigaense_denovo_1164	31	100	1	233	233	1260265	1260497	+	1
M. shigaense_denovo_1167	68	100	1	1031	1031	1261622	1262652	+	1
M. shigaense_denovo_1166	39	100	1	739	739	1260800	1261538	+	1
M. shigaense_denovo_8379	46	100	1	299	299	57938	58236	+	1
M. shigaense_denovo_8378	52	100	1	4438	4438	53377	57814	+	1
M. shigaense_denovo_8373	28	100	1	132	132	2486019	2486150	+	1
M. shigaense_denovo_8372	30	100	1	59	59	2485951	2486009	+	1
M. shigaense_denovo_8371	41	100	1	532	532	2485332	2485863	+	1
M. shigaense_denovo_8370	35	100	1	356	356	2484872	2485227	+	1
M. shigaense_denovo_8377	54	100	1	233	233	52969	53201	+	1
M. shigaense_denovo_8376	52	100	1	757	757	500559	501315	+	1
M. shigaense_denovo_8375	41	100	1	654	654	2486971	2487624	+	1
M. shigaense_denovo_8374	32	100	1	396	396	2486454	2486849	+	1
M. shigaense_denovo_5860	36	100	1	281	281	2993893	2994173	+	1
M. shigaense_denovo_5861	32	100	1	73	73	2994214	2994286	+	1
M. shigaense_denovo_5862	29	100	1	233	233	2994343	2994575	+	1
M. shigaense_denovo_5863	31	100	1	138	138	2994585	2994722	+	1
M. shigaense_denovo_5864	30	100	1	100	100	2994887	2994986	+	1
M. shigaense_denovo_5865	35	100	1	240	240	2995087	2995326	+	1
M. shigaense_denovo_5866	47	100	1	444	444	2995361	2995804	+	1
M. shigaense_denovo_5867	33	100	1	376	376	2995837	2996212	+	1
M. shigaense_denovo_5868	34	100	1	1244	1244	2996296	2997539	+	1
M. shigaense_denovo_4199	31	100	1	239	239	5003688	5003926	+	1
M. shigaense_denovo_4198	37	100	1	330	330	5003308	5003637	+	1
M. shigaense_denovo_1349	43	100	1	1322	1322	2107948	2109269	+	1
M. shigaense_denovo_8039	58	100	1	570	570	1976934	1977503	+	1
M. shigaense_denovo_4193	29	100	1	143	143	5002155	5002297	+	1
M. shigaense_denovo_4192	35	100	1	252	252	5001667	5001918	+	1
M. shigaense_denovo_7648	38	100	1	684	684	5064149	5064832	+	1
M. shigaense_denovo_7649	44	100	1	631	631	5064840	5065470	+	1
M. shigaense_denovo_7646	32	100	1	155	155	5063739	5063893	+	1
M. shigaense_denovo_7647	28	100	1	57	57	5064068	5064124	+	1
M. shigaense_denovo_7644	46	100	1	345	345	5062758	5063102	+	1
M. shigaense_denovo_7645	48	100	1	506	506	5063142	5063647	+	1
M. shigaense_denovo_1600	145	100	1	4369	4369	594225	598593	+	1
M. shigaense_denovo_7643	36	100	1	628	628	5062117	5062744	+	1
M. shigaense_denovo_6599	30	100	1	77	77	3727135	3727211	+	1
M. shigaense_denovo_6598	41	100	1	369	369	3726756	3727124	+	1
M. shigaense_denovo_6595	38	100	1	260	260	3719686	3719945	+	1
M. shigaense_denovo_6594	31	100	1	175	175	3719394	3719568	+	1
M. shigaense_denovo_6597	58	100	1	6451	6451	3720303	3726753	+	1
M. shigaense_denovo_6596	31	100	1	338	338	3719958	3720295	+	1
M. shigaense_denovo_6593	34	100	1	337	337	3718629	3718965	+	1
M. shigaense_denovo_7428	46	100	1	604	604	499741	500344	+	1
M. shigaense_denovo_7429	35	100	1	407	407	2488244	2488650	+	1
M. shigaense_denovo_7422	52	100	1	877	877	231535	232411	+	1
M. shigaense_denovo_7423	40	100	1	1398	1398	232529	233926	+	1
M. shigaense_denovo_7420	41	100	1	815	815	229727	230541	+	1
M. shigaense_denovo_7426	33	100	1	195	195	235091	235285	+	1
M. shigaense_denovo_7427	31	100	1	228	228	499378	499605	+	1
M. shigaense_denovo_7424	32	100	1	208	208	234220	234427	+	1
M. shigaense_denovo_7425	29	100	1	78	78	234471	234548	+	1
M. shigaense_denovo_6771	30	100	1	143	143	147805	147947	+	1
M. shigaense_denovo_6770	33	100	1	358	358	147402	147759	+	1
M. shigaense_denovo_6772	40	100	1	661	661	147960	148620	+	1
M. shigaense_denovo_2661	113	100	1	3021	3021	1340884	1343904	+	1
M. shigaense_denovo_4993	29	100	1	53	53	1143650	1143702	+	1
M. shigaense_denovo_4992	63	100	1	1064	1064	1142535	1143598	+	1
M. shigaense_denovo_1163	50	100	1	1143	1143	1258911	1260053	+	1
M. shigaense_denovo_4995	37	100	1	741	741	1143895	1144635	+	1
M. shigaense_denovo_4994	30	100	1	106	106	1143743	1143848	+	1
M. shigaense_denovo_1903	32	100	1	278	278	3539449	3539726	+	1
M. shigaense_denovo_1902	126	100	1	10695	10695	3528450	3539144	+	1
M. shigaense_denovo_1901	66	100	1	357	357	4481776	4482132	+	1
M. shigaense_denovo_1900	45	100	1	725	725	4480768	4481492	+	1
M. shigaense_denovo_1907	34	100	1	311	311	3541189	3541499	+	1
M. shigaense_denovo_1906	29	100	1	79	79	3540572	3540650	+	1
M. shigaense_denovo_1905	34	100	1	406	406	3539815	3540220	+	1
M. shigaense_denovo_1904	30	100	1	56	56	3539757	3539812	+	1
M. shigaense_denovo_3258	45	100	1	342	342	2005220	2005561	+	1
M. shigaense_denovo_4853	86	100	1	3816	3816	2812609	2816424	+	1
M. shigaense_denovo_4856	48	100	1	1096	1096	2817273	2818368	+	1
M. shigaense_denovo_4857	30	100	1	50	50	2818371	2818420	+	1
M. shigaense_denovo_4854	32	100	1	253	253	2816426	2816678	+	1
M. shigaense_denovo_4855	40	100	1	303	303	2816775	2817077	+	1
M. shigaense_denovo_4858	29	100	1	69	69	2818425	2818493	+	1
M. shigaense_denovo_4859	30	100	1	92	92	2818549	2818640	+	1
M. shigaense_denovo_3257	31	100	1	102	102	2005111	2005212	+	1
M. shigaense_denovo_3256	30	100	1	51	51	2005028	2005078	+	1
M. shigaense_denovo_5458	29	100	1	130	130	4264873	4265002	+	1
M. shigaense_denovo_5450	59	100	1	362	362	52353	52714	+	1
M. shigaense_denovo_5453	64	100	1	2653	2653	4257549	4260201	+	1
M. shigaense_denovo_5455	62	100	1	2378	2378	4261084	4263461	+	1
M. shigaense_denovo_5454	35	100	1	352	352	4260639	4260990	+	1
M. shigaense_denovo_5109	34	100	1	186	186	4957488	4957673	+	1
M. shigaense_denovo_5456	30	100	1	356	356	4263900	4264255	+	1
M. shigaense_denovo_4197	28	100	1	52	52	5002781	5002832	+	1
M. shigaense_denovo_4196	28	100	1	53	53	5002599	5002651	+	1
M. shigaense_denovo_4195	32	100	1	149	149	5002363	5002511	+	1
M. shigaense_denovo_4194	28	100	1	51	51	5002305	5002355	+	1
M. shigaense_denovo_6093	54	100	1	1178	1178	1287769	1288946	+	1
M. shigaense_denovo_6098	43	100	1	314	314	1290328	1290641	+	1
M. shigaense_denovo_4008	32	100	1	95	95	1444981	1445075	+	1
M. shigaense_denovo_6906	43	100	1	718	718	1033526	1034243	+	1
M. shigaense_denovo_6904	33	100	1	244	244	1032697	1032940	+	1
M. shigaense_denovo_6905	29	100	1	53	53	1032974	1033026	+	1
M. shigaense_denovo_6902	43	100	1	1228	1228	1028370	1029597	+	1
M. shigaense_denovo_6903	53	100	1	2555	2555	1029770	1032324	+	1
M. shigaense_denovo_6900	39	100	1	622	622	1027378	1027999	+	1
M. shigaense_denovo_6901	30	100	1	87	87	1028213	1028299	+	1
M. shigaense_denovo_7369	29	100	1	109	109	3616386	3616494	+	1
M. shigaense_denovo_7368	29	100	1	67	67	3616317	3616383	+	1
M. shigaense_denovo_7365	29	100	1	117	117	3613846	3613962	+	1
M. shigaense_denovo_7364	30	100	1	57	57	3613787	3613843	+	1
M. shigaense_denovo_7367	49	100	1	1201	1201	3614377	3615577	+	1
M. shigaense_denovo_7366	31	100	1	138	138	3614020	3614157	+	1
M. shigaense_denovo_7361	29	100	1	80	80	3613263	3613342	+	1
M. shigaense_denovo_7360	30	100	1	94	94	3613125	3613218	+	1
M. shigaense_denovo_7363	29	100	1	56	56	3613703	3613758	+	1
M. shigaense_denovo_7362	34	100	1	342	342	3613344	3613685	+	1
M. shigaense_denovo_707	35	100	1	234	234	3102894	3103127	+	1
M. shigaense_denovo_709	40	100	1	602	602	3104327	3104928	+	1
M. shigaense_denovo_708	44	100	1	317	317	3103386	3103702	+	1
M. shigaense_denovo_2863	46	100	1	668	668	3990849	3991516	+	1
M. shigaense_denovo_2865	31	100	1	246	246	3993324	3993569	+	1
M. shigaense_denovo_2864	43	100	1	1771	1771	3991535	3993305	+	1
M. shigaense_denovo_2867	38	100	1	773	773	3994274	3995046	+	1
M. shigaense_denovo_2866	40	100	1	423	423	3993811	3994233	+	1
M. shigaense_denovo_2868	40	100	1	523	523	3995224	3995746	+	1
M. shigaense_denovo_3441	28	100	1	55	55	3463250	3463304	+	1
M. shigaense_denovo_3442	29	100	1	68	68	3463765	3463832	+	1
M. shigaense_denovo_3443	29	100	1	99	99	3465317	3465415	+	1
M. shigaense_denovo_3444	30	100	1	268	268	3465808	3466075	+	1
M. shigaense_denovo_3445	98	100	1	3095	3095	3466153	3469247	+	1
M. shigaense_denovo_3446	72	100	1	5680	5680	3469290	3474969	+	1
M. shigaense_denovo_3447	50	100	1	1215	1215	3474986	3476200	+	1
M. shigaense_denovo_3448	32	100	1	229	229	3476477	3476705	+	1
M. shigaense_denovo_3449	34	100	1	573	573	3477015	3477587	+	1
M. shigaense_denovo_5590	32	100	1	294	294	632614	632907	+	1
M. shigaense_denovo_1109	59	100	1	1971	1971	1949	3919	+	1
M. shigaense_denovo_1107	107	100	1	10075	10075	5197573	5207647	+	1
M. shigaense_denovo_1106	42	100	1	260	260	5197312	5197571	+	1
M. shigaense_denovo_2719	39	100	1	330	330	2478232	2478561	+	1
M. shigaense_denovo_2718	42	100	1	652	652	2476850	2477501	+	1
M. shigaense_denovo_8354	30	100	1	358	358	4518323	4518680	+	1
M. shigaense_denovo_5848	33	100	1	185	185	2985506	2985690	+	1
M. shigaense_denovo_5849	43	100	1	825	825	2985750	2986574	+	1
M. shigaense_denovo_8351	38	100	1	609	609	4516930	4517538	+	1
M. shigaense_denovo_8353	40	100	1	337	337	4517879	4518215	+	1
M. shigaense_denovo_8352	32	100	1	300	300	4517555	4517854	+	1
M. shigaense_denovo_5843	34	100	1	469	469	2981012	2981480	+	1
M. shigaense_denovo_5846	36	100	1	307	307	2983608	2983914	+	1
M. shigaense_denovo_5847	52	100	1	1295	1295	2983924	2985218	+	1
M. shigaense_denovo_5844	29	100	1	70	70	2981575	2981644	+	1
M. shigaense_denovo_5845	34	100	1	494	494	2982945	2983438	+	1
M. shigaense_denovo_7998	28	100	1	52	52	1845222	1845273	+	1
M. shigaense_denovo_7999	29	100	1	150	150	1845279	1845428	+	1
M. shigaense_denovo_6577	45	100	1	402	402	2896417	2896818	+	1
M. shigaense_denovo_6576	31	100	1	95	95	2895973	2896067	+	1
M. shigaense_denovo_6575	29	100	1	82	82	2895846	2895927	+	1
M. shigaense_denovo_6574	29	100	1	187	187	2895190	2895376	+	1
M. shigaense_denovo_6573	30	100	1	83	83	2894973	2895055	+	1
M. shigaense_denovo_6572	51	100	1	844	844	2893891	2894734	+	1
M. shigaense_denovo_6571	29	100	1	83	83	2893799	2893881	+	1
M. shigaense_denovo_6570	30	100	1	125	125	2893406	2893530	+	1
M. shigaense_denovo_6579	48	100	1	327	327	2898362	2898688	+	1
M. shigaense_denovo_6578	41	100	1	437	437	2897242	2897678	+	1
M. shigaense_denovo_4719	47	100	1	530	530	335127	335656	+	1
M. shigaense_denovo_4718	48	100	1	362	362	334535	334896	+	1
M. shigaense_denovo_4711	40	100	1	410	410	328324	328733	+	1
M. shigaense_denovo_4710	34	100	1	307	307	327995	328301	+	1
M. shigaense_denovo_4713	35	100	1	187	187	329489	329675	+	1
M. shigaense_denovo_4712	36	100	1	271	271	329068	329338	+	1
M. shigaense_denovo_4715	80	100	1	1439	1439	332077	333515	+	1
M. shigaense_denovo_4714	75	100	1	2342	2342	329710	332051	+	1
M. shigaense_denovo_4717	34	100	1	509	509	334021	334529	+	1
M. shigaense_denovo_4716	30	100	1	324	324	333604	333927	+	1
M. shigaense_denovo_552	104	100	1	1252	1252	2802624	2803875	+	1
M. shigaense_denovo_553	44	100	1	1529	1529	2803933	2805461	+	1
M. shigaense_denovo_550	39	100	1	569	569	2801513	2802081	+	1
M. shigaense_denovo_551	32	100	1	273	273	2802311	2802583	+	1
M. shigaense_denovo_554	53	100	1	1569	1569	2805570	2807138	+	1
M. shigaense_denovo_3591	38	100	1	471	471	3508591	3509061	+	1
M. shigaense_denovo_1929	44	100	1	646	646	3579317	3579962	+	1
M. shigaense_denovo_1928	46	100	1	3535	3535	3575706	3579240	+	1
M. shigaense_denovo_1925	59	100	1	731	731	3566650	3567380	+	1
M. shigaense_denovo_1924	46	100	1	1913	1913	3564688	3566600	+	1
M. shigaense_denovo_1927	224	100	1	5940	5940	3569676	3575615	+	1
M. shigaense_denovo_1926	28	100	1	73	73	3567468	3567540	+	1
M. shigaense_denovo_1921	32	100	1	229	229	4804463	4804691	+	1
M. shigaense_denovo_1920	39	100	1	533	533	4803731	4804263	+	1
M. shigaense_denovo_1923	28	100	1	57	57	3564550	3564606	+	1
M. shigaense_denovo_1922	36	100	1	546	546	4805060	4805605	+	1
M. shigaense_denovo_7421	46	100	1	691	691	230813	231503	+	1
M. shigaense_denovo_7975	55	100	1	4650	4650	5163573	5168222	+	1
M. shigaense_denovo_2472	29	100	1	94	94	765857	765950	+	1
M. shigaense_denovo_2473	30	100	1	54	54	766027	766080	+	1
M. shigaense_denovo_2470	29	100	1	52	52	765124	765175	+	1
M. shigaense_denovo_2471	37	100	1	528	528	765248	765775	+	1
M. shigaense_denovo_2476	92	100	1	3009	3009	767414	770422	+	1
M. shigaense_denovo_2477	42	100	1	551	551	770443	770993	+	1
M. shigaense_denovo_2474	39	100	1	438	438	766123	766560	+	1
M. shigaense_denovo_2475	58	100	1	622	622	766621	767242	+	1
M. shigaense_denovo_2478	35	100	1	346	346	771457	771802	+	1
M. shigaense_denovo_2479	38	100	1	615	615	772137	772751	+	1
M. shigaense_denovo_4126	36	100	1	431	431	4937761	4938191	+	1
M. shigaense_denovo_8528	39	100	1	344	344	3709681	3710024	+	1
M. shigaense_denovo_8529	37	100	1	333	333	3710146	3710478	+	1
M. shigaense_denovo_4127	148	100	1	1359	1359	2102079	2103437	+	1
M. shigaense_denovo_4124	49	100	1	1436	1436	3142968	3144403	+	1
M. shigaense_denovo_1402	34	100	1	460	460	778422	778881	+	1
M. shigaense_denovo_1403	34	100	1	318	318	778888	779205	+	1
M. shigaense_denovo_1400	31	100	1	139	139	776025	776163	+	1
M. shigaense_denovo_1401	46	100	1	2211	2211	776182	778392	+	1
M. shigaense_denovo_5121	30	100	1	207	207	4909575	4909781	+	1
M. shigaense_denovo_5120	33	100	1	436	436	4908739	4909174	+	1
M. shigaense_denovo_5123	31	100	1	280	280	4910728	4911007	+	1
M. shigaense_denovo_5122	38	100	1	422	422	4910023	4910444	+	1
M. shigaense_denovo_5125	38	100	1	340	340	4911943	4912282	+	1
M. shigaense_denovo_5124	38	100	1	680	680	4911192	4911871	+	1
M. shigaense_denovo_5435	37	100	1	243	243	41127	41369	+	1
[truncated: 6,686 more rows]
