# Supplementary material
Source: publisher figshare collection journal article supplement (https://tandf.figshare.com/articles/dataset/_/7936865)
Supplement: Supplementary file 1 [file 1 › temi_a_12040023_sm0018.xlsx]

## Sheet: Sheet1
Supplementary Table S11. Mapping between predicted protein-coding genes and transcripts
Id	Gene length	Strand	Start	End	Transcript id	Transcript length	Strand	Start	End
M. shigaense_orf00002	1200	+	2009	3208	M. shigaense_denovo_1109	1971	+	1949	3919
M. shigaense_orf00005	252	+	4688	4939	M. shigaense_denovo_2685	8330	+	4631	12960
M. shigaense_orf00006	2034	+	5206	7239	M. shigaense_denovo_2685	8330	+	4631	12960
M. shigaense_orf00008	2514	+	7281	9794	M. shigaense_denovo_2685	8330	+	4631	12960
M. shigaense_orf00010	861	+	9918	10778	M. shigaense_denovo_2685	8330	+	4631	12960
M. shigaense_orf00011	120	+	10942	11061	M. shigaense_denovo_2685	8330	+	4631	12960
M. shigaense_orf00012	750	+	11593	12342	M. shigaense_denovo_2685	8330	+	4631	12960
M. shigaense_orf00013	546	-	12907	12362	M. shigaense_denovo_1064	7809	-	5132	12940
M. shigaense_orf00016	426	-	14759	14334	M. shigaense_denovo_5959	3534	-	13471	17004
M. shigaense_orf00017	531	+	14884	15414	M. shigaense_denovo_2689	1974	+	14822	16795
M. shigaense_orf00018	366	-	15803	15438	M. shigaense_denovo_5959	3534	-	13471	17004
M. shigaense_orf00019	282	-	16306	16025	M. shigaense_denovo_5959	3534	-	13471	17004
M. shigaense_orf00023	1872	-	19755	17884	M. shigaense_denovo_3803	2831	-	17231	20061
M. shigaense_orf00029	1443	-	25400	23958	M. shigaense_denovo_5030	3245	-	23517	26761
M. shigaense_orf00031	468	-	25933	25466	M. shigaense_denovo_5030	3245	-	23517	26761
M. shigaense_orf00035	258	-	28146	27889	M. shigaense_denovo_4329	1115	-	27786	28900
M. shigaense_orf00036	495	+	28328	28822	M. shigaense_denovo_1872	1034	+	27925	28958
M. shigaense_orf00038	333	-	30888	30556	M. shigaense_denovo_7858	1988	-	29593	31580
M. shigaense_orf00043	417	-	33822	33406	M. shigaense_denovo_7852	424	-	33404	33827
M. shigaense_orf00047	363	+	35627	35989	M. shigaense_denovo_5429	1235	+	35392	36626
M. shigaense_orf00051	318	+	37585	37902	M. shigaense_denovo_5431	892	+	37464	38355
M. shigaense_orf00052	303	+	37899	38201	M. shigaense_denovo_5431	892	+	37464	38355
M. shigaense_orf00060	306	+	46196	46501	M. shigaense_denovo_5442	2194	+	45143	47336
M. shigaense_orf00063	774	-	48498	47725	M. shigaense_denovo_7121	3761	-	46085	49845
M. shigaense_orf00065	1302	-	49809	48508	M. shigaense_denovo_7121	3761	-	46085	49845
M. shigaense_orf00069	357	-	51924	51568	M. shigaense_denovo_6773	641	-	51291	51931
M. shigaense_orf00073	672	-	56955	56284	M. shigaense_denovo_7302	3587	-	54248	57834
M. shigaense_orf00075	507	-	57510	57004	M. shigaense_denovo_7302	3587	-	54248	57834
M. shigaense_orf00083	1101	-	64892	63792	M. shigaense_denovo_2255	1791	-	63762	65552
M. shigaense_orf00084	543	-	65513	64971	M. shigaense_denovo_2255	1791	-	63762	65552
M. shigaense_orf00085	405	+	65849	66253	M. shigaense_denovo_2702	2983	+	65600	68582
M. shigaense_orf00088	1647	+	68846	70492	M. shigaense_denovo_3680	2687	+	68721	71407
M. shigaense_orf00090	399	+	70523	70921	M. shigaense_denovo_3680	2687	+	68721	71407
M. shigaense_orf00099	291	+	77150	77440	M. shigaense_denovo_3690	2389	+	76647	79035
M. shigaense_orf00100	519	+	77512	78030	M. shigaense_denovo_3690	2389	+	76647	79035
M. shigaense_orf00102	120	-	78160	78041	M. shigaense_denovo_3303	2716	-	77084	79799
M. shigaense_orf00103	195	+	78132	78326	M. shigaense_denovo_3690	2389	+	76647	79035
M. shigaense_orf00105	459	+	78357	78815	M. shigaense_denovo_3690	2389	+	76647	79035
M. shigaense_orf00107	132	+	78857	78988	M. shigaense_denovo_3690	2389	+	76647	79035
M. shigaense_orf00114	342	-	83090	82749	M. shigaense_denovo_3299	2245	-	82305	84549
M. shigaense_orf00115	342	-	83391	83050	M. shigaense_denovo_3299	2245	-	82305	84549
M. shigaense_orf00116	360	-	84019	83660	M. shigaense_denovo_3299	2245	-	82305	84549
M. shigaense_orf00117	306	-	84465	84160	M. shigaense_denovo_3299	2245	-	82305	84549
M. shigaense_orf00119	132	+	84800	84931	M. shigaense_denovo_3695	4074	+	81499	85572
M. shigaense_orf00124	135	+	88685	88819	M. shigaense_denovo_5933	817	+	88246	89062
M. shigaense_orf00133	156	+	95827	95982	M. shigaense_denovo_5399	1542	+	94956	96497
M. shigaense_orf00137	660	-	98111	97452	M. shigaense_denovo_5619	1439	-	96679	98117
M. shigaense_orf00142	165	+	99846	100010	M. shigaense_denovo_5404	771	+	99707	100477
M. shigaense_orf00146	834	-	105663	104830	M. shigaense_denovo_7818	893	-	104783	105675
M. shigaense_orf00150	1224	-	108121	106898	M. shigaense_denovo_5724	4024	-	106775	110798
M. shigaense_orf00153	156	-	109288	109133	M. shigaense_denovo_5724	4024	-	106775	110798
M. shigaense_orf00154	1029	+	109597	110625	M. shigaense_denovo_6249	1293	+	109406	110698
M. shigaense_orf00193	888	+	141871	142758	M. shigaense_denovo_6766	3196	+	141812	145007
M. shigaense_orf00195	582	+	142812	143393	M. shigaense_denovo_6766	3196	+	141812	145007
M. shigaense_orf00207	1353	+	152474	153826	M. shigaense_denovo_893	4900	+	152455	157354
M. shigaense_orf00208	1479	+	154201	155679	M. shigaense_denovo_893	4900	+	152455	157354
M. shigaense_orf00210	606	+	155742	156347	M. shigaense_denovo_893	4900	+	152455	157354
M. shigaense_orf00212	282	-	156654	156373	M. shigaense_denovo_1103	3761	-	153634	157394
M. shigaense_orf00220	597	-	163620	163024	M. shigaense_denovo_1097	1810	-	162257	164066
M. shigaense_orf00234	354	+	176529	176882	M. shigaense_denovo_1975	3136	+	176039	179174
M. shigaense_orf00235	1125	+	176931	178055	M. shigaense_denovo_1975	3136	+	176039	179174
M. shigaense_orf00236	387	+	178088	178474	M. shigaense_denovo_1975	3136	+	176039	179174
M. shigaense_orf00238	1653	-	180715	179063	M. shigaense_denovo_83	4727	-	178626	183352
M. shigaense_orf00239	771	-	181549	180779	M. shigaense_denovo_83	4727	-	178626	183352
M. shigaense_orf00240	831	-	182821	181991	M. shigaense_denovo_83	4727	-	178626	183352
M. shigaense_orf00243	726	-	184439	183714	M. shigaense_denovo_81	3711	-	183577	187287
M. shigaense_orf00244	828	-	185324	184497	M. shigaense_denovo_81	3711	-	183577	187287
M. shigaense_orf00245	1383	-	186899	185517	M. shigaense_denovo_81	3711	-	183577	187287
M. shigaense_orf00249	471	+	189470	189940	M. shigaense_denovo_335	4717	+	186209	190925
M. shigaense_orf00251	561	-	190507	189947	M. shigaense_denovo_683	3936	-	187336	191271
M. shigaense_orf00256	618	+	192131	192748	M. shigaense_denovo_337	1187	+	191799	192985
M. shigaense_orf00264	828	-	201438	200611	M. shigaense_denovo_1599	1586	-	200105	201690
M. shigaense_orf00266	162	+	202650	202811	M. shigaense_denovo_353	2537	+	200300	202836
M. shigaense_orf00273	603	-	207755	207153	M. shigaense_denovo_1592	2779	-	206461	209239
M. shigaense_orf00274	165	+	207938	208102	M. shigaense_denovo_3562	2538	+	206627	209164
M. shigaense_orf00275	318	+	208159	208476	M. shigaense_denovo_3562	2538	+	206627	209164
M. shigaense_orf00276	129	+	208466	208594	M. shigaense_denovo_3562	2538	+	206627	209164
M. shigaense_orf00277	570	-	209117	208548	M. shigaense_denovo_1592	2779	-	206461	209239
M. shigaense_orf00280	456	+	210034	210489	M. shigaense_denovo_624	1394	+	209272	210665
M. shigaense_orf00283	741	-	212044	211304	M. shigaense_denovo_1844	2034	-	210865	212898
M. shigaense_orf00284	618	-	212885	212268	M. shigaense_denovo_1844	2034	-	210865	212898
M. shigaense_orf00286	954	+	212968	213921	M. shigaense_denovo_1793	6751	+	210907	217657
M. shigaense_orf00287	120	-	214049	213930	M. shigaense_denovo_1843	4676	-	212938	217613
M. shigaense_orf00288	1092	+	214173	215264	M. shigaense_denovo_1793	6751	+	210907	217657
M. shigaense_orf00290	1398	+	215266	216663	M. shigaense_denovo_1793	6751	+	210907	217657
M. shigaense_orf00291	249	-	216908	216660	M. shigaense_denovo_1843	4676	-	212938	217613
M. shigaense_orf00292	306	-	217213	216908	M. shigaense_denovo_1843	4676	-	212938	217613
M. shigaense_orf00293	165	-	217377	217213	M. shigaense_denovo_1843	4676	-	212938	217613
M. shigaense_orf00294	204	-	217580	217377	M. shigaense_denovo_1843	4676	-	212938	217613
M. shigaense_orf00295	1185	+	217738	218922	M. shigaense_denovo_1794	6227	+	217684	223910
M. shigaense_orf00298	4806	-	223763	218958	M. shigaense_denovo_1842	6211	-	217704	223914
M. shigaense_orf00319	846	+	232576	233421	M. shigaense_denovo_7423	1398	+	232529	233926
M. shigaense_orf00336	216	+	245387	245602	M. shigaense_denovo_1505	3663	+	245022	248684
M. shigaense_orf00337	1707	+	245748	247454	M. shigaense_denovo_1505	3663	+	245022	248684
M. shigaense_orf00338	963	-	248396	247434	M. shigaense_denovo_1466	1980	-	246481	248460
M. shigaense_orf00344	741	-	253583	252843	M. shigaense_denovo_7172	2802	-	251092	253893
M. shigaense_orf00350	162	-	257302	257141	M. shigaense_denovo_7167	1444	-	256583	258026
M. shigaense_orf00360	1353	+	265289	266641	M. shigaense_denovo_8634	2333	+	264895	267227
M. shigaense_orf00373	606	+	275837	276442	M. shigaense_denovo_2845	1291	+	275827	277117
M. shigaense_orf00375	672	-	277124	276453	M. shigaense_denovo_2642	1708	-	275443	277150
M. shigaense_orf00377	1149	+	278293	279441	M. shigaense_denovo_2846	5039	+	277215	282253
M. shigaense_orf00378	381	+	279507	279887	M. shigaense_denovo_2846	5039	+	277215	282253
M. shigaense_orf00380	294	+	279842	280135	M. shigaense_denovo_2846	5039	+	277215	282253
M. shigaense_orf00381	1113	-	281251	280139	M. shigaense_denovo_2641	5407	-	277210	282616
M. shigaense_orf00383	588	-	281835	281248	M. shigaense_denovo_2641	5407	-	277210	282616
M. shigaense_orf00386	339	+	283260	283598	M. shigaense_denovo_2609	503	+	283166	283668
M. shigaense_orf00389	1335	+	284446	285780	M. shigaense_denovo_2611	2356	+	284417	286772
M. shigaense_orf00391	576	-	286619	286044	M. shigaense_denovo_2552	3079	-	284417	287495
M. shigaense_orf00393	258	+	287809	288066	M. shigaense_denovo_5276	1553	+	287710	289262
M. shigaense_orf00397	429	+	294442	294870	M. shigaense_denovo_5283	1214	+	293705	294918
M. shigaense_orf00400	369	+	297967	298335	M. shigaense_denovo_962	10554	+	297618	308171
M. shigaense_orf00402	156	-	298512	298357	M. shigaense_denovo_918	3776	-	297390	301165
M. shigaense_orf00403	144	-	298778	298635	M. shigaense_denovo_918	3776	-	297390	301165
M. shigaense_orf00404	846	-	299845	299000	M. shigaense_denovo_918	3776	-	297390	301165
M. shigaense_orf00406	813	-	300848	300036	M. shigaense_denovo_918	3776	-	297390	301165
M. shigaense_orf00407	123	-	301133	301011	M. shigaense_denovo_918	3776	-	297390	301165
M. shigaense_orf00409	120	-	301492	301373	M. shigaense_denovo_917	7317	-	301177	308493
M. shigaense_orf00411	174	+	302573	302746	M. shigaense_denovo_962	10554	+	297618	308171
M. shigaense_orf00413	648	+	302934	303581	M. shigaense_denovo_962	10554	+	297618	308171
M. shigaense_orf00414	894	+	304051	304944	M. shigaense_denovo_962	10554	+	297618	308171
M. shigaense_orf00415	213	-	305157	304945	M. shigaense_denovo_917	7317	-	301177	308493
M. shigaense_orf00416	624	-	305817	305194	M. shigaense_denovo_917	7317	-	301177	308493
M. shigaense_orf00417	1320	+	305949	307268	M. shigaense_denovo_962	10554	+	297618	308171
M. shigaense_orf00418	528	-	307797	307270	M. shigaense_denovo_917	7317	-	301177	308493
M. shigaense_orf00422	378	+	309483	309860	M. shigaense_denovo_3415	1300	+	309298	310597
M. shigaense_orf00424	456	-	310299	309844	M. shigaense_denovo_913	1424	-	309423	310846
M. shigaense_orf00425	552	+	311312	311863	M. shigaense_denovo_3416	1562	+	311163	312724
M. shigaense_orf00427	1041	+	313382	314422	M. shigaense_denovo_3417	11706	+	312730	324435
M. shigaense_orf00428	549	+	314454	315002	M. shigaense_denovo_3417	11706	+	312730	324435
M. shigaense_orf00430	918	+	315112	316029	M. shigaense_denovo_3417	11706	+	312730	324435
M. shigaense_orf00431	942	+	316056	316997	M. shigaense_denovo_3417	11706	+	312730	324435
M. shigaense_orf00432	1467	+	317174	318640	M. shigaense_denovo_3417	11706	+	312730	324435
M. shigaense_orf00433	1422	+	318793	320214	M. shigaense_denovo_3417	11706	+	312730	324435
M. shigaense_orf00435	855	+	320281	321135	M. shigaense_denovo_3417	11706	+	312730	324435
M. shigaense_orf00436	828	-	321966	321139	M. shigaense_denovo_910	11932	-	312567	324498
M. shigaense_orf00437	1251	-	323209	321959	M. shigaense_denovo_910	11932	-	312567	324498
M. shigaense_orf00438	462	+	323313	323774	M. shigaense_denovo_3417	11706	+	312730	324435
M. shigaense_orf00443	1425	+	325264	326688	M. shigaense_denovo_2256	2574	+	324991	327564
M. shigaense_orf00444	126	-	326871	326746	M. shigaense_denovo_908	2638	-	324695	327332
M. shigaense_orf00449	1344	+	329771	331114	M. shigaense_denovo_4714	2342	+	329710	332051
M. shigaense_orf00451	117	+	331240	331356	M. shigaense_denovo_4714	2342	+	329710	332051
M. shigaense_orf00452	126	-	331603	331478	M. shigaense_denovo_903	3668	-	329786	333453
M. shigaense_orf00456	501	+	332101	332601	M. shigaense_denovo_4715	1439	+	332077	333515
M. shigaense_orf00457	540	-	333163	332624	M. shigaense_denovo_903	3668	-	329786	333453
M. shigaense_orf00485	441	+	352743	353183	M. shigaense_denovo_1196	15377	+	352431	367807
M. shigaense_orf00487	597	-	353776	353180	M. shigaense_denovo_1233	16295	-	350955	367249
M. shigaense_orf00490	1653	+	354026	355678	M. shigaense_denovo_1196	15377	+	352431	367807
M. shigaense_orf00491	813	+	355935	356747	M. shigaense_denovo_1196	15377	+	352431	367807
M. shigaense_orf00492	870	+	356749	357618	M. shigaense_denovo_1196	15377	+	352431	367807
M. shigaense_orf00493	1302	+	357624	358925	M. shigaense_denovo_1196	15377	+	352431	367807
M. shigaense_orf00494	1041	+	358922	359962	M. shigaense_denovo_1196	15377	+	352431	367807
M. shigaense_orf00497	1563	+	359986	361548	M. shigaense_denovo_1196	15377	+	352431	367807
M. shigaense_orf00499	1593	+	361545	363137	M. shigaense_denovo_1196	15377	+	352431	367807
M. shigaense_orf00500	1143	+	363209	364351	M. shigaense_denovo_1196	15377	+	352431	367807
M. shigaense_orf00502	1551	+	364345	365895	M. shigaense_denovo_1196	15377	+	352431	367807
M. shigaense_orf00503	717	+	365865	366581	M. shigaense_denovo_1196	15377	+	352431	367807
M. shigaense_orf00504	132	-	366744	366613	M. shigaense_denovo_1233	16295	-	350955	367249
M. shigaense_orf00505	783	+	366779	367561	M. shigaense_denovo_1196	15377	+	352431	367807
M. shigaense_orf00508	822	+	368079	368900	M. shigaense_denovo_1197	1253	+	367948	369200
M. shigaense_orf00511	1095	-	370741	369647	M. shigaense_denovo_1230	1339	-	369427	370765
M. shigaense_orf00518	951	-	376067	375117	M. shigaense_denovo_6797	2228	-	373958	376185
M. shigaense_orf00519	852	+	376238	377089	M. shigaense_denovo_152	1572	+	376150	377721
M. shigaense_orf00523	168	-	378702	378535	M. shigaense_denovo_6792	517	-	378244	378760
M. shigaense_orf00526	750	+	379760	380509	M. shigaense_denovo_157	6865	+	379024	385888
M. shigaense_orf00527	441	+	380581	381021	M. shigaense_denovo_157	6865	+	379024	385888
M. shigaense_orf00530	2121	+	381014	383134	M. shigaense_denovo_157	6865	+	379024	385888
M. shigaense_orf00532	147	-	383320	383174	M. shigaense_denovo_143	6152	-	379733	385884
M. shigaense_orf00533	732	+	383413	384144	M. shigaense_denovo_157	6865	+	379024	385888
M. shigaense_orf00535	1692	-	385844	384153	M. shigaense_denovo_143	6152	-	379733	385884
M. shigaense_orf00540	1299	+	386289	387587	M. shigaense_denovo_158	5236	+	385925	391160
M. shigaense_orf00541	1035	+	387705	388739	M. shigaense_denovo_158	5236	+	385925	391160
M. shigaense_orf00542	600	+	388817	389416	M. shigaense_denovo_158	5236	+	385925	391160
M. shigaense_orf00550	516	-	395585	395070	M. shigaense_denovo_136	1332	-	394886	396217
M. shigaense_orf00554	495	+	398950	399444	M. shigaense_denovo_2516	1683	+	398930	400612
M. shigaense_orf00559	2808	-	404738	401931	M. shigaense_denovo_134	6251	-	400779	407029
M. shigaense_orf00561	741	-	405564	404824	M. shigaense_denovo_134	6251	-	400779	407029
M. shigaense_orf00563	639	-	406216	405578	M. shigaense_denovo_134	6251	-	400779	407029
M. shigaense_orf00565	1086	+	406555	407640	M. shigaense_denovo_2517	7859	+	400801	408659
M. shigaense_orf00568	1842	+	409353	411194	M. shigaense_denovo_2518	3673	+	408664	412336
M. shigaense_orf00569	300	+	411297	411596	M. shigaense_denovo_2518	3673	+	408664	412336
M. shigaense_orf00573	276	-	414447	414172	M. shigaense_denovo_129	488	-	414111	414598
M. shigaense_orf00589	162	-	424450	424289	M. shigaense_denovo_2493	1206	-	423281	424486
M. shigaense_orf00590	1503	+	424707	426209	M. shigaense_denovo_1661	3280	+	424662	427941
M. shigaense_orf00591	297	+	426206	426502	M. shigaense_denovo_1661	3280	+	424662	427941
M. shigaense_orf00592	657	-	427163	426507	M. shigaense_denovo_2492	4899	-	424667	429565
M. shigaense_orf00593	132	-	427317	427186	M. shigaense_denovo_2492	4899	-	424667	429565
M. shigaense_orf00594	1512	-	429166	427655	M. shigaense_denovo_2492	4899	-	424667	429565
M. shigaense_orf00603	1281	-	434115	432835	M. shigaense_denovo_3492	1409	-	432801	434209
M. shigaense_orf00611	702	+	440413	441114	M. shigaense_denovo_579	3403	+	440054	443456
M. shigaense_orf00613	936	+	441111	442046	M. shigaense_denovo_579	3403	+	440054	443456
M. shigaense_orf00615	1377	-	443427	442051	M. shigaense_denovo_3479	3835	-	439613	443447
M. shigaense_orf00616	1650	+	443510	445159	M. shigaense_denovo_580	1956	+	443468	445423
M. shigaense_orf00617	129	+	445197	445325	M. shigaense_denovo_580	1956	+	443468	445423
M. shigaense_orf00630	174	-	454850	454677	M. shigaense_denovo_628	257	-	454626	454882
M. shigaense_orf00632	207	-	455164	454958	M. shigaense_denovo_627	331	-	454884	455214
M. shigaense_orf00636	597	+	456547	457143	M. shigaense_denovo_1587	1746	+	456375	458120
M. shigaense_orf00641	843	-	459283	458441	M. shigaense_denovo_625	3961	-	455666	459626
M. shigaense_orf00643	1275	+	460894	462168	M. shigaense_denovo_5696	2188	+	460099	462286
M. shigaense_orf00660	576	+	470675	471250	M. shigaense_denovo_2588	2743	+	469181	471923
M. shigaense_orf00668	195	-	477605	477411	M. shigaense_denovo_471	293	-	477370	477662
M. shigaense_orf00671	132	-	479393	479262	M. shigaense_denovo_467	641	-	478836	479476
M. shigaense_orf00674	918	-	480905	479988	M. shigaense_denovo_466	2605	-	479495	482099
M. shigaense_orf00676	657	-	481575	480919	M. shigaense_denovo_466	2605	-	479495	482099
M. shigaense_orf00679	1230	-	484012	482783	M. shigaense_denovo_4161	4529	-	482308	486836
M. shigaense_orf00682	423	-	486183	485761	M. shigaense_denovo_4161	4529	-	482308	486836
M. shigaense_orf00695	660	-	494058	493399	M. shigaense_denovo_5332	2228	-	493098	495325
M. shigaense_orf00697	813	+	494245	495057	M. shigaense_denovo_6170	1206	+	494120	495325
M. shigaense_orf00704	210	-	498056	497847	M. shigaense_denovo_5330	1598	-	496585	498182
M. shigaense_orf00707	1602	+	501997	503598	M. shigaense_denovo_7430	3445	+	501397	504841
M. shigaense_orf00710	168	-	507696	507529	M. shigaense_denovo_6295	8232	-	499653	507884
M. shigaense_orf00734	483	-	521784	521302	M. shigaense_denovo_3605	2103	-	520193	522295
M. shigaense_orf00737	480	-	523708	523229	M. shigaense_denovo_3604	1924	-	522400	524323
M. shigaense_orf00742	1938	+	525749	527686	M. shigaense_denovo_3778	5943	+	524425	530367
M. shigaense_orf00743	387	+	527779	528165	M. shigaense_denovo_3778	5943	+	524425	530367
M. shigaense_orf00744	753	-	528933	528181	M. shigaense_denovo_3602	2928	-	527589	530516
M. shigaense_orf00745	1029	+	528981	530009	M. shigaense_denovo_3778	5943	+	524425	530367
M. shigaense_orf00758	246	+	535353	535598	M. shigaense_denovo_1284	916	+	534946	535861
M. shigaense_orf00767	516	+	539813	540328	M. shigaense_denovo_3507	606	+	539741	540346
M. shigaense_orf00768	807	-	541264	540458	M. shigaense_denovo_5499	875	-	540398	541272
M. shigaense_orf00771	279	-	543022	542744	M. shigaense_denovo_3168	690	-	542423	543112
M. shigaense_orf00773	804	-	544539	543736	M. shigaense_denovo_3167	2124	-	543630	545753
M. shigaense_orf00774	1110	-	545724	544615	M. shigaense_denovo_3167	2124	-	543630	545753
M. shigaense_orf00778	648	+	548204	548851	M. shigaense_denovo_6554	1938	+	548128	550065
M. shigaense_orf00779	573	+	548893	549465	M. shigaense_denovo_6554	1938	+	548128	550065
M. shigaense_orf00789	363	+	555325	555687	M. shigaense_denovo_4284	739	+	555060	555798
M. shigaense_orf00791	1272	-	557793	556522	M. shigaense_denovo_4545	7047	-	555111	562157
M. shigaense_orf00793	1263	-	559087	557825	M. shigaense_denovo_4545	7047	-	555111	562157
M. shigaense_orf00794	2874	-	562018	559145	M. shigaense_denovo_4545	7047	-	555111	562157
M. shigaense_orf00811	471	-	572732	572262	M. shigaense_denovo_7356	1185	-	571745	572929
M. shigaense_orf00815	582	-	573924	573343	M. shigaense_denovo_1765	920	-	573014	573933
M. shigaense_orf00823	1869	+	580350	582218	M. shigaense_denovo_1052	6732	+	580239	586970
M. shigaense_orf00825	630	+	582215	582844	M. shigaense_denovo_1052	6732	+	580239	586970
M. shigaense_orf00827	1182	+	582921	584102	M. shigaense_denovo_1052	6732	+	580239	586970
M. shigaense_orf00828	387	+	584102	584488	M. shigaense_denovo_1052	6732	+	580239	586970
M. shigaense_orf00829	1176	+	584591	585766	M. shigaense_denovo_1052	6732	+	580239	586970
M. shigaense_orf00830	816	+	585763	586578	M. shigaense_denovo_1052	6732	+	580239	586970
M. shigaense_orf00838	816	-	595610	594795	M. shigaense_denovo_1744	5023	-	594214	599236
M. shigaense_orf00840	846	+	595710	596555	M. shigaense_denovo_1600	4369	+	594225	598593
M. shigaense_orf00841	534	+	596602	597135	M. shigaense_denovo_1600	4369	+	594225	598593
M. shigaense_orf00843	900	+	597149	598048	M. shigaense_denovo_1600	4369	+	594225	598593
M. shigaense_orf00850	678	-	604775	604098	M. shigaense_denovo_1739	4402	-	602116	606517
M. shigaense_orf00851	1035	+	604891	605925	M. shigaense_denovo_5869	2435	+	604054	606488
M. shigaense_orf00854	414	+	606932	607345	M. shigaense_denovo_5870	2457	+	606621	609077
M. shigaense_orf00855	840	-	608181	607342	M. shigaense_denovo_1738	1964	-	606539	608502
M. shigaense_orf00860	1299	+	609815	611113	M. shigaense_denovo_5873	1670	+	609779	611448
M. shigaense_orf00864	417	+	613069	613485	M. shigaense_denovo_5875	2073	+	612906	614978
M. shigaense_orf00865	1230	+	613493	614722	M. shigaense_denovo_5875	2073	+	612906	614978
M. shigaense_orf00873	906	+	618505	619410	M. shigaense_denovo_5880	2486	+	618336	620821
M. shigaense_orf00876	372	+	621284	621655	M. shigaense_denovo_5882	644	+	621251	621894
M. shigaense_orf00877	1185	-	621247	620063	M. shigaense_denovo_6530	2410	-	619763	622172
M. shigaense_orf00880	489	+	622612	623100	M. shigaense_denovo_8608	1081	+	622176	623256
M. shigaense_orf00898	972	-	638977	638006	M. shigaense_denovo_3389	4046	-	636285	640330
M. shigaense_orf00899	1320	-	640293	638974	M. shigaense_denovo_3389	4046	-	636285	640330
M. shigaense_orf00902	609	+	640452	641060	M. shigaense_denovo_3658	1220	+	640388	641607
M. shigaense_orf00905	1041	+	641858	642898	M. shigaense_denovo_3659	2252	+	641707	643958
M. shigaense_orf00906	210	+	642895	643104	M. shigaense_denovo_3659	2252	+	641707	643958
M. shigaense_orf00908	756	+	643097	643852	M. shigaense_denovo_3659	2252	+	641707	643958
M. shigaense_orf00910	522	-	645142	644621	M. shigaense_denovo_3384	803	-	644365	645167
M. shigaense_orf00925	1647	-	655856	654210	M. shigaense_denovo_3368	3662	-	653552	657213
M. shigaense_orf00926	279	-	656302	656024	M. shigaense_denovo_3368	3662	-	653552	657213
M. shigaense_orf00927	267	+	656362	656628	M. shigaense_denovo_3740	2129	+	655086	657214
M. shigaense_orf00928	432	-	657094	656663	M. shigaense_denovo_3368	3662	-	653552	657213
M. shigaense_orf00932	309	+	659753	660061	M. shigaense_denovo_3742	4351	+	658942	663292
M. shigaense_orf00934	438	+	660126	660563	M. shigaense_denovo_3742	4351	+	658942	663292
M. shigaense_orf00935	732	+	660596	661327	M. shigaense_denovo_3742	4351	+	658942	663292
M. shigaense_orf00936	1140	+	661308	662447	M. shigaense_denovo_3742	4351	+	658942	663292
M. shigaense_orf00937	645	+	662447	663091	M. shigaense_denovo_3742	4351	+	658942	663292
M. shigaense_orf00946	267	+	672593	672859	M. shigaense_denovo_1472	3367	+	672555	675921
M. shigaense_orf00948	324	+	672868	673191	M. shigaense_denovo_1472	3367	+	672555	675921
M. shigaense_orf00949	492	-	673670	673179	M. shigaense_denovo_1676	2794	-	672555	675348
M. shigaense_orf00950	594	+	673726	674319	M. shigaense_denovo_1472	3367	+	672555	675921
M. shigaense_orf00951	915	-	675314	674400	M. shigaense_denovo_1676	2794	-	672555	675348
M. shigaense_orf00959	828	-	679730	678903	M. shigaense_denovo_6514	2998	-	678499	681496
M. shigaense_orf00980	267	-	695148	694882	M. shigaense_denovo_1664	2439	-	694720	697158
M. shigaense_orf00981	453	-	695719	695267	M. shigaense_denovo_1664	2439	-	694720	697158
M. shigaense_orf00983	312	-	697007	696696	M. shigaense_denovo_1664	2439	-	694720	697158
M. shigaense_orf00984	915	-	696699	695785	M. shigaense_denovo_1664	2439	-	694720	697158
M. shigaense_orf00987	549	+	700666	701214	M. shigaense_denovo_5818	3566	+	700357	703922
M. shigaense_orf00988	279	+	701225	701503	M. shigaense_denovo_5818	3566	+	700357	703922
M. shigaense_orf00990	549	+	701496	702044	M. shigaense_denovo_5818	3566	+	700357	703922
M. shigaense_orf00992	1398	+	702062	703459	M. shigaense_denovo_5818	3566	+	700357	703922
M. shigaense_orf00993	276	+	703463	703738	M. shigaense_denovo_5818	3566	+	700357	703922
M. shigaense_orf00994	576	-	704310	703735	M. shigaense_denovo_2637	5353	-	700367	705719
M. shigaense_orf00997	1341	-	705647	704307	M. shigaense_denovo_2637	5353	-	700367	705719
M. shigaense_orf00999	807	+	705881	706687	M. shigaense_denovo_2638	906	+	705864	706769
M. shigaense_orf01000	1287	+	706960	708246	M. shigaense_denovo_2639	5217	+	706804	712020
M. shigaense_orf01001	816	+	708462	709277	M. shigaense_denovo_2639	5217	+	706804	712020
M. shigaense_orf01002	861	+	709353	710213	M. shigaense_denovo_2639	5217	+	706804	712020
M. shigaense_orf01005	702	-	711988	711287	M. shigaense_denovo_869	6627	-	710381	717007
M. shigaense_orf01008	432	+	713570	714001	M. shigaense_denovo_2640	4959	+	712132	717090
M. shigaense_orf01009	603	+	714302	714904	M. shigaense_denovo_2640	4959	+	712132	717090
M. shigaense_orf01010	276	+	714990	715265	M. shigaense_denovo_2640	4959	+	712132	717090
M. shigaense_orf01012	420	+	715270	715689	M. shigaense_denovo_2640	4959	+	712132	717090
M. shigaense_orf01014	678	+	715689	716366	M. shigaense_denovo_2640	4959	+	712132	717090
M. shigaense_orf01023	159	-	722348	722190	M. shigaense_denovo_4474	4475	-	722129	726603
M. shigaense_orf01024	1314	+	722319	723632	M. shigaense_denovo_600	8778	+	720084	728861
M. shigaense_orf01026	1335	+	723691	725025	M. shigaense_denovo_600	8778	+	720084	728861
M. shigaense_orf01027	507	+	725078	725584	M. shigaense_denovo_600	8778	+	720084	728861
M. shigaense_orf01029	750	+	725682	726431	M. shigaense_denovo_600	8778	+	720084	728861
M. shigaense_orf01031	1230	+	726606	727835	M. shigaense_denovo_600	8778	+	720084	728861
M. shigaense_orf01032	684	+	727885	728568	M. shigaense_denovo_600	8778	+	720084	728861
M. shigaense_orf01050	138	+	737533	737670	M. shigaense_denovo_613	6376	+	737359	743734
M. shigaense_orf01051	1116	+	738025	739140	M. shigaense_denovo_613	6376	+	737359	743734
M. shigaense_orf01052	1068	+	739146	740213	M. shigaense_denovo_613	6376	+	737359	743734
M. shigaense_orf01053	930	-	741222	740293	M. shigaense_denovo_692	3849	-	738950	742798
M. shigaense_orf01054	516	-	741747	741232	M. shigaense_denovo_692	3849	-	738950	742798
M. shigaense_orf01055	921	-	742709	741789	M. shigaense_denovo_692	3849	-	738950	742798
M. shigaense_orf01056	207	-	743036	742830	M. shigaense_denovo_691	924	-	742813	743736
M. shigaense_orf01063	258	+	746648	746905	M. shigaense_denovo_617	7764	+	745664	753427
M. shigaense_orf01065	1401	+	747030	748430	M. shigaense_denovo_617	7764	+	745664	753427
M. shigaense_orf01067	957	+	748435	749391	M. shigaense_denovo_617	7764	+	745664	753427
M. shigaense_orf01068	1629	+	749469	751097	M. shigaense_denovo_617	7764	+	745664	753427
M. shigaense_orf01070	888	+	751216	752103	M. shigaense_denovo_617	7764	+	745664	753427
M. shigaense_orf01071	552	+	752145	752696	M. shigaense_denovo_617	7764	+	745664	753427
M. shigaense_orf01072	270	+	752693	752962	M. shigaense_denovo_617	7764	+	745664	753427
M. shigaense_orf01073	441	-	753383	752943	M. shigaense_denovo_684	6766	-	746659	753424
M. shigaense_orf01075	696	+	755114	755809	M. shigaense_denovo_619	1794	+	754485	756278
M. shigaense_orf01077	117	-	759321	759205	M. shigaense_denovo_6843	329	-	759001	759329
M. shigaense_orf01086	213	+	765269	765481	M. shigaense_denovo_2471	528	+	765248	765775
M. shigaense_orf01091	1215	+	767532	768746	M. shigaense_denovo_2476	3009	+	767414	770422
M. shigaense_orf01093	609	+	768746	769354	M. shigaense_denovo_2476	3009	+	767414	770422
M. shigaense_orf01094	597	+	769357	769953	M. shigaense_denovo_2476	3009	+	767414	770422
M. shigaense_orf01124	1098	-	788426	787329	M. shigaense_denovo_1136	4499	-	786792	791290
M. shigaense_orf01125	339	-	788809	788471	M. shigaense_denovo_1136	4499	-	786792	791290
M. shigaense_orf01127	300	-	789162	788863	M. shigaense_denovo_1136	4499	-	786792	791290
M. shigaense_orf01128	1191	-	790349	789159	M. shigaense_denovo_1136	4499	-	786792	791290
M. shigaense_orf01129	408	-	790875	790468	M. shigaense_denovo_1136	4499	-	786792	791290
M. shigaense_orf01132	903	-	792730	791828	M. shigaense_denovo_6092	2437	-	791544	793980
M. shigaense_orf01134	198	-	792920	792723	M. shigaense_denovo_6092	2437	-	791544	793980
M. shigaense_orf01136	549	+	794023	794571	M. shigaense_denovo_5802	1874	+	793982	795855
M. shigaense_orf01137	939	-	793938	793000	M. shigaense_denovo_6092	2437	-	791544	793980
M. shigaense_orf01149	693	+	804161	804853	M. shigaense_denovo_2167	3997	+	802124	806120
M. shigaense_orf01150	363	-	805223	804861	M. shigaense_denovo_2524	3418	-	803870	807287
M. shigaense_orf01151	675	-	805975	805301	M. shigaense_denovo_2524	3418	-	803870	807287
M. shigaense_orf01152	1215	-	807272	806058	M. shigaense_denovo_2524	3418	-	803870	807287
M. shigaense_orf01153	1008	+	807321	808328	M. shigaense_denovo_2169	3663	+	807305	810967
M. shigaense_orf01154	864	+	808432	809295	M. shigaense_denovo_2169	3663	+	807305	810967
M. shigaense_orf01156	483	+	809382	809864	M. shigaense_denovo_2169	3663	+	807305	810967
M. shigaense_orf01159	1263	+	813055	814317	M. shigaense_denovo_3271	5159	+	812955	818113
M. shigaense_orf01164	510	-	817489	816980	M. shigaense_denovo_2713	2613	-	816198	818810
M. shigaense_orf01165	618	-	816986	816369	M. shigaense_denovo_2713	2613	-	816198	818810
M. shigaense_orf01167	492	-	818055	817564	M. shigaense_denovo_2713	2613	-	816198	818810
M. shigaense_orf01168	138	-	818405	818268	M. shigaense_denovo_2713	2613	-	816198	818810
M. shigaense_orf01174	219	-	824441	824223	M. shigaense_denovo_2787	995	-	824028	825022
M. shigaense_orf01183	120	+	833574	833693	M. shigaense_denovo_6433	182	+	833553	833734
M. shigaense_orf01192	516	+	840547	841062	M. shigaense_denovo_5883	1908	+	840078	841985
M. shigaense_orf01198	201	-	844004	843804	M. shigaense_denovo_2755	556	-	843548	844103
M. shigaense_orf01200	696	-	845938	845243	M. shigaense_denovo_2754	2358	-	844112	846469
M. shigaense_orf01203	201	+	847782	847982	M. shigaense_denovo_2633	7105	+	847747	854851
M. shigaense_orf01204	150	+	848326	848475	M. shigaense_denovo_2633	7105	+	847747	854851
M. shigaense_orf01206	480	+	848533	849012	M. shigaense_denovo_2633	7105	+	847747	854851
M. shigaense_orf01207	456	+	848972	849427	M. shigaense_denovo_2633	7105	+	847747	854851
M. shigaense_orf01208	501	+	849441	849941	M. shigaense_denovo_2633	7105	+	847747	854851
M. shigaense_orf01211	444	+	850317	850760	M. shigaense_denovo_2633	7105	+	847747	854851
M. shigaense_orf01212	762	+	850793	851554	M. shigaense_denovo_2633	7105	+	847747	854851
M. shigaense_orf01213	429	+	851650	852078	M. shigaense_denovo_2633	7105	+	847747	854851
M. shigaense_orf01214	708	+	852156	852863	M. shigaense_denovo_2633	7105	+	847747	854851
M. shigaense_orf01215	1239	-	854105	852867	M. shigaense_denovo_2752	7327	-	847780	855106
M. shigaense_orf01217	699	-	854813	854115	M. shigaense_denovo_2752	7327	-	847780	855106
M. shigaense_orf01234	624	+	867590	868213	M. shigaense_denovo_1387	1379	+	867393	868771
M. shigaense_orf01235	396	+	868264	868659	M. shigaense_denovo_1387	1379	+	867393	868771
M. shigaense_orf01240	1011	+	871162	872172	M. shigaense_denovo_1391	9793	+	870332	880124
M. shigaense_orf01241	156	-	872669	872514	M. shigaense_denovo_1294	9092	-	871033	880124
M. shigaense_orf01242	3363	+	872766	876128	M. shigaense_denovo_1391	9793	+	870332	880124
M. shigaense_orf01243	3951	+	876164	880114	M. shigaense_denovo_1391	9793	+	870332	880124
M. shigaense_orf01262	375	+	893654	894028	M. shigaense_denovo_878	4880	+	893216	898095
M. shigaense_orf01263	471	+	894028	894498	M. shigaense_denovo_878	4880	+	893216	898095
M. shigaense_orf01265	2106	+	894591	896696	M. shigaense_denovo_878	4880	+	893216	898095
M. shigaense_orf01266	1191	+	896879	898069	M. shigaense_denovo_878	4880	+	893216	898095
M. shigaense_orf01272	822	+	899173	899994	M. shigaense_denovo_8093	3099	+	898761	901859
M. shigaense_orf01273	834	+	900068	900901	M. shigaense_denovo_8093	3099	+	898761	901859
M. shigaense_orf01282	312	+	904260	904571	M. shigaense_denovo_4276	3669	+	904139	907807
M. shigaense_orf01283	1206	+	904568	905773	M. shigaense_denovo_4276	3669	+	904139	907807
M. shigaense_orf01284	1191	+	905776	906966	M. shigaense_denovo_4276	3669	+	904139	907807
M. shigaense_orf01290	483	-	913825	913343	M. shigaense_denovo_3698	2537	-	913217	915753
M. shigaense_orf01298	588	-	940287	939700	M. shigaense_denovo_570	3023	-	938059	941081
M. shigaense_orf01299	342	-	940736	940395	M. shigaense_denovo_570	3023	-	938059	941081
M. shigaense_orf01300	132	-	941055	940924	M. shigaense_denovo_570	3023	-	938059	941081
M. shigaense_orf01322	900	+	953332	954231	M. shigaense_denovo_8635	2006	+	952700	954705
M. shigaense_orf01331	369	+	959947	960315	M. shigaense_denovo_3113	7318	+	959798	967115
M. shigaense_orf01333	318	+	960316	960633	M. shigaense_denovo_3113	7318	+	959798	967115
M. shigaense_orf01335	564	+	960635	961198	M. shigaense_denovo_3113	7318	+	959798	967115
M. shigaense_orf01336	186	+	961203	961388	M. shigaense_denovo_3113	7318	+	959798	967115
M. shigaense_orf01337	399	+	961532	961930	M. shigaense_denovo_3113	7318	+	959798	967115
M. shigaense_orf01338	540	+	961954	962493	M. shigaense_denovo_3113	7318	+	959798	967115
M. shigaense_orf01339	270	+	962631	962900	M. shigaense_denovo_3113	7318	+	959798	967115
M. shigaense_orf01340	687	+	962947	963633	M. shigaense_denovo_3113	7318	+	959798	967115
M. shigaense_orf01341	201	+	963630	963830	M. shigaense_denovo_3113	7318	+	959798	967115
M. shigaense_orf01342	441	+	963827	964267	M. shigaense_denovo_3113	7318	+	959798	967115
M. shigaense_orf01343	252	-	964633	964382	M. shigaense_denovo_3440	7273	-	959802	967074
M. shigaense_orf01345	681	-	965313	964633	M. shigaense_denovo_3440	7273	-	959802	967074
M. shigaense_orf01364	615	+	978310	978924	M. shigaense_denovo_1700	1305	+	978246	979550
M. shigaense_orf01369	1326	+	982159	983484	M. shigaense_denovo_1705	5946	+	982084	988029
M. shigaense_orf01371	546	+	983481	984026	M. shigaense_denovo_1705	5946	+	982084	988029
M. shigaense_orf01372	765	+	984065	984829	M. shigaense_denovo_1705	5946	+	982084	988029
M. shigaense_orf01374	546	+	984870	985415	M. shigaense_denovo_1705	5946	+	982084	988029
M. shigaense_orf01375	768	+	985486	986253	M. shigaense_denovo_1705	5946	+	982084	988029
M. shigaense_orf01376	501	+	986497	986997	M. shigaense_denovo_1705	5946	+	982084	988029
M. shigaense_orf01377	423	+	987163	987585	M. shigaense_denovo_1705	5946	+	982084	988029
M. shigaense_orf01381	387	+	988641	989027	M. shigaense_denovo_1707	1169	+	988157	989325
M. shigaense_orf01383	873	-	989979	989107	M. shigaense_denovo_6626	4787	-	988230	993016
M. shigaense_orf01384	1170	-	991174	990005	M. shigaense_denovo_6626	4787	-	988230	993016
M. shigaense_orf01387	1521	-	992699	991179	M. shigaense_denovo_6626	4787	-	988230	993016
M. shigaense_orf01398	474	-	999515	999042	M. shigaense_denovo_6620	3388	-	998900	1002287
M. shigaense_orf01399	624	-	1000150	999527	M. shigaense_denovo_6620	3388	-	998900	1002287
M. shigaense_orf01400	996	-	1001147	1000152	M. shigaense_denovo_6620	3388	-	998900	1002287
M. shigaense_orf01401	867	-	1002041	1001175	M. shigaense_denovo_6620	3388	-	998900	1002287
M. shigaense_orf01409	222	+	1006406	1006627	M. shigaense_denovo_2565	6768	+	1006272	1013039
M. shigaense_orf01410	114	+	1006675	1006788	M. shigaense_denovo_2565	6768	+	1006272	1013039
M. shigaense_orf01411	375	+	1006992	1007366	M. shigaense_denovo_2565	6768	+	1006272	1013039
M. shigaense_orf01413	417	+	1007373	1007789	M. shigaense_denovo_2565	6768	+	1006272	1013039
M. shigaense_orf01414	606	+	1007800	1008405	M. shigaense_denovo_2565	6768	+	1006272	1013039
M. shigaense_orf01415	1044	+	1008536	1009579	M. shigaense_denovo_2565	6768	+	1006272	1013039
M. shigaense_orf01416	549	+	1009637	1010185	M. shigaense_denovo_2565	6768	+	1006272	1013039
M. shigaense_orf01417	711	+	1010325	1011035	M. shigaense_denovo_2565	6768	+	1006272	1013039
M. shigaense_orf01418	645	-	1011681	1011037	M. shigaense_denovo_2568	7978	-	1005197	1013174
M. shigaense_orf01420	879	-	1012671	1011793	M. shigaense_denovo_2568	7978	-	1005197	1013174
M. shigaense_orf01431	444	+	1023295	1023738	M. shigaense_denovo_3752	3876	+	1022442	1026317
M. shigaense_orf01432	498	+	1023735	1024232	M. shigaense_denovo_3752	3876	+	1022442	1026317
M. shigaense_orf01433	1338	+	1024382	1025719	M. shigaense_denovo_3752	3876	+	1022442	1026317
M. shigaense_orf01434	321	+	1025767	1026087	M. shigaense_denovo_3752	3876	+	1022442	1026317
M. shigaense_orf01440	1818	+	1029810	1031627	M. shigaense_denovo_6903	2555	+	1029770	1032324
M. shigaense_orf01448	171	-	1036142	1035972	M. shigaense_denovo_5681	325	-	1035928	1036252
M. shigaense_orf01458	483	+	1044945	1045427	M. shigaense_denovo_5413	1635	+	1044131	1045765
M. shigaense_orf01462	930	-	1055192	1054263	M. shigaense_denovo_851	2413	-	1053846	1056258
M. shigaense_orf01465	621	+	1056962	1057582	M. shigaense_denovo_1041	1426	+	1056880	1058305
M. shigaense_orf01466	471	+	1057579	1058049	M. shigaense_denovo_1041	1426	+	1056880	1058305
M. shigaense_orf01472	186	+	1061768	1061953	M. shigaense_denovo_3171	1397	+	1061383	1062779
M. shigaense_orf01474	801	-	1062756	1061956	M. shigaense_denovo_1275	5006	-	1061401	1066406
M. shigaense_orf01476	1242	+	1062834	1064075	M. shigaense_denovo_3172	2850	+	1062803	1065652
M. shigaense_orf01478	114	+	1064439	1064552	M. shigaense_denovo_3172	2850	+	1062803	1065652
M. shigaense_orf01479	693	-	1065254	1064562	M. shigaense_denovo_1275	5006	-	1061401	1066406
M. shigaense_orf01483	639	-	1067957	1067319	M. shigaense_denovo_1271	909	-	1067073	1067981
M. shigaense_orf01488	309	-	1068862	1068554	M. shigaense_denovo_1268	1400	-	1068310	1069709
M. shigaense_orf01489	807	+	1069219	1070025	M. shigaense_denovo_1280	8880	+	1068634	1077513
M. shigaense_orf01490	501	+	1070184	1070684	M. shigaense_denovo_1280	8880	+	1068634	1077513
M. shigaense_orf01492	795	+	1070671	1071465	M. shigaense_denovo_1280	8880	+	1068634	1077513
M. shigaense_orf01494	1611	+	1072027	1073637	M. shigaense_denovo_1280	8880	+	1068634	1077513
M. shigaense_orf01495	1146	+	1073634	1074779	M. shigaense_denovo_1280	8880	+	1068634	1077513
M. shigaense_orf01496	1740	+	1074832	1076571	M. shigaense_denovo_1280	8880	+	1068634	1077513
M. shigaense_orf01498	903	-	1077480	1076578	M. shigaense_denovo_1266	5509	-	1072005	1077513
M. shigaense_orf01507	1581	+	1085233	1086813	M. shigaense_denovo_3794	3043	+	1084589	1087631
M. shigaense_orf01514	429	-	1092117	1091689	M. shigaense_denovo_6639	3681	-	1091163	1094843
M. shigaense_orf01517	1920	-	1094051	1092132	M. shigaense_denovo_6639	3681	-	1091163	1094843
M. shigaense_orf01518	876	+	1094944	1095819	M. shigaense_denovo_7890	1169	+	1094853	1096021
M. shigaense_orf01520	1137	-	1096952	1095816	M. shigaense_denovo_6638	2227	-	1094846	1097072
M. shigaense_orf01525	336	+	1101853	1102188	M. shigaense_denovo_7034	2621	+	1101546	1104166
M. shigaense_orf01526	417	-	1102623	1102207	M. shigaense_denovo_6289	2049	-	1101454	1103502
M. shigaense_orf01527	645	+	1102647	1103291	M. shigaense_denovo_7034	2621	+	1101546	1104166
M. shigaense_orf01539	405	+	1108450	1108854	M. shigaense_denovo_6244	1877	+	1108318	1110194
M. shigaense_orf01540	330	+	1108906	1109235	M. shigaense_denovo_6244	1877	+	1108318	1110194
M. shigaense_orf01542	573	+	1109216	1109788	M. shigaense_denovo_6244	1877	+	1108318	1110194
M. shigaense_orf01551	285	+	1117754	1118038	M. shigaense_denovo_8588	1659	+	1116927	1118585
M. shigaense_orf01564	744	-	1131206	1130463	M. shigaense_denovo_4258	7083	-	1129811	1136893
M. shigaense_orf01565	1152	-	1132345	1131194	M. shigaense_denovo_4258	7083	-	1129811	1136893
M. shigaense_orf01568	1359	-	1133725	1132367	M. shigaense_denovo_4258	7083	-	1129811	1136893
M. shigaense_orf01570	2238	+	1134010	1136247	M. shigaense_denovo_3833	6858	+	1129871	1136728
M. shigaense_orf01573	810	-	1138301	1137492	M. shigaense_denovo_4257	1363	-	1136980	1138342
M. shigaense_orf01584	438	-	1147676	1147239	M. shigaense_denovo_6910	887	-	1146837	1147723
M. shigaense_orf01587	276	+	1149168	1149443	M. shigaense_denovo_7249	912	+	1149165	1150076
M. shigaense_orf01601	381	+	1160087	1160467	M. shigaense_denovo_7414	1798	+	1160069	1161866
M. shigaense_orf01603	1314	+	1160464	1161777	M. shigaense_denovo_7414	1798	+	1160069	1161866
M. shigaense_orf01615	1011	+	1165949	1166959	M. shigaense_denovo_5137	2031	+	1165507	1167537
M. shigaense_orf01619	1296	-	1170372	1169077	M. shigaense_denovo_7627	2479	-	1168833	1171311
M. shigaense_orf01621	849	-	1171265	1170417	M. shigaense_denovo_7627	2479	-	1168833	1171311
M. shigaense_orf01626	663	+	1174485	1175147	M. shigaense_denovo_7349	2349	+	1173996	1176344
M. shigaense_orf01641	426	+	1184540	1184965	M. shigaense_denovo_6886	790	+	1184476	1185265
M. shigaense_orf01651	393	-	1190967	1190575	M. shigaense_denovo_69	1298	-	1189696	1190993
M. shigaense_orf01661	528	-	1198020	1197493	M. shigaense_denovo_61	2653	-	1196373	1199025
M. shigaense_orf01664	438	+	1199331	1199768	M. shigaense_denovo_35	8121	+	1199308	1207428
M. shigaense_orf01666	795	+	1199765	1200559	M. shigaense_denovo_35	8121	+	1199308	1207428
M. shigaense_orf01667	411	-	1200949	1200539	M. shigaense_denovo_60	8530	-	1199203	1207732
M. shigaense_orf01670	1800	-	1202941	1201142	M. shigaense_denovo_60	8530	-	1199203	1207732
M. shigaense_orf01672	423	-	1203487	1203065	M. shigaense_denovo_60	8530	-	1199203	1207732
M. shigaense_orf01673	891	-	1204388	1203498	M. shigaense_denovo_60	8530	-	1199203	1207732
M. shigaense_orf01674	645	-	1205051	1204407	M. shigaense_denovo_60	8530	-	1199203	1207732
M. shigaense_orf01675	240	-	1205287	1205048	M. shigaense_denovo_60	8530	-	1199203	1207732
M. shigaense_orf01678	1641	-	1206951	1205311	M. shigaense_denovo_60	8530	-	1199203	1207732
M. shigaense_orf01684	492	+	1211922	1212413	M. shigaense_denovo_5045	2824	+	1211896	1214719
M. shigaense_orf01685	1170	+	1212438	1213607	M. shigaense_denovo_5045	2824	+	1211896	1214719
M. shigaense_orf01697	777	+	1220823	1221599	M. shigaense_denovo_3805	2812	+	1219212	1222023
M. shigaense_orf01699	282	-	1224060	1223779	M. shigaense_denovo_3879	815	-	1223281	1224095
M. shigaense_orf01707	891	+	1228987	1229877	M. shigaense_denovo_6547	3361	+	1228083	1231443
M. shigaense_orf01708	1056	+	1229900	1230955	M. shigaense_denovo_6547	3361	+	1228083	1231443
M. shigaense_orf01714	1344	-	1234434	1233091	M. shigaense_denovo_1435	1826	-	1232632	1234457
M. shigaense_orf01716	273	+	1235855	1236127	M. shigaense_denovo_1626	7105	+	1234869	1241973
M. shigaense_orf01717	480	-	1236626	1236147	M. shigaense_denovo_1433	2759	-	1234918	1237676
M. shigaense_orf01718	387	+	1236794	1237180	M. shigaense_denovo_1626	7105	+	1234869	1241973
M. shigaense_orf01719	1398	+	1237252	1238649	M. shigaense_denovo_1626	7105	+	1234869	1241973
M. shigaense_orf01721	1089	+	1238646	1239734	M. shigaense_denovo_1626	7105	+	1234869	1241973
M. shigaense_orf01723	1227	+	1239743	1240969	M. shigaense_denovo_1626	7105	+	1234869	1241973
M. shigaense_orf01725	705	-	1241651	1240947	M. shigaense_denovo_5251	1210	-	1240499	1241708
M. shigaense_orf01731	1209	+	1243998	1245206	M. shigaense_denovo_2485	4618	+	1243741	1248358
M. shigaense_orf01732	174	+	1245203	1245376	M. shigaense_denovo_2485	4618	+	1243741	1248358
M. shigaense_orf01733	183	+	1245373	1245555	M. shigaense_denovo_2485	4618	+	1243741	1248358
M. shigaense_orf01734	606	+	1245596	1246201	M. shigaense_denovo_2485	4618	+	1243741	1248358
M. shigaense_orf01736	1458	+	1246298	1247755	M. shigaense_denovo_2485	4618	+	1243741	1248358
M. shigaense_orf01740	687	+	1248507	1249193	M. shigaense_denovo_2487	4273	+	1248427	1252699
M. shigaense_orf01741	1635	+	1249264	1250898	M. shigaense_denovo_2487	4273	+	1248427	1252699
M. shigaense_orf01744	1776	+	1250898	1252673	M. shigaense_denovo_2487	4273	+	1248427	1252699
M. shigaense_orf01757	522	-	1261105	1260584	M. shigaense_denovo_593	549	-	1260563	1261111
M. shigaense_orf01761	519	+	1263607	1264125	M. shigaense_denovo_677	7530	+	1262770	1270299
M. shigaense_orf01762	1152	+	1264187	1265338	M. shigaense_denovo_677	7530	+	1262770	1270299
M. shigaense_orf01764	1284	+	1265442	1266725	M. shigaense_denovo_677	7530	+	1262770	1270299
M. shigaense_orf01765	846	-	1267582	1266737	M. shigaense_denovo_591	9594	-	1262766	1272359
M. shigaense_orf01768	606	-	1268251	1267646	M. shigaense_denovo_591	9594	-	1262766	1272359
M. shigaense_orf01771	1947	-	1270253	1268307	M. shigaense_denovo_591	9594	-	1262766	1272359
M. shigaense_orf01772	330	+	1270380	1270709	M. shigaense_denovo_678	1746	+	1270368	1272113
M. shigaense_orf01773	633	-	1271345	1270713	M. shigaense_denovo_591	9594	-	1262766	1272359
M. shigaense_orf01775	309	-	1271653	1271345	M. shigaense_denovo_591	9594	-	1262766	1272359
M. shigaense_orf01779	510	+	1273174	1273683	M. shigaense_denovo_680	1562	+	1273162	1274723
M. shigaense_orf01780	234	+	1273751	1273984	M. shigaense_denovo_680	1562	+	1273162	1274723
M. shigaense_orf01781	168	+	1274775	1274942	M. shigaense_denovo_681	3058	+	1274757	1277814
M. shigaense_orf01783	177	+	1275061	1275237	M. shigaense_denovo_681	3058	+	1274757	1277814
M. shigaense_orf01784	243	-	1276491	1276249	M. shigaense_denovo_588	2119	-	1274757	1276875
M. shigaense_orf01787	324	-	1276849	1276526	M. shigaense_denovo_588	2119	-	1274757	1276875
M. shigaense_orf01788	366	+	1276969	1277334	M. shigaense_denovo_681	3058	+	1274757	1277814
M. shigaense_orf01791	474	+	1278636	1279109	M. shigaense_denovo_4222	1672	+	1278629	1280300
M. shigaense_orf01792	987	-	1280082	1279096	M. shigaense_denovo_582	2809	-	1278626	1281434
M. shigaense_orf01793	1356	-	1281434	1280079	M. shigaense_denovo_582	2809	-	1278626	1281434
M. shigaense_orf01799	537	+	1285034	1285570	M. shigaense_denovo_4873	2478	+	1284836	1287313
M. shigaense_orf01800	162	+	1285567	1285728	M. shigaense_denovo_4873	2478	+	1284836	1287313
M. shigaense_orf01802	237	-	1285961	1285725	M. shigaense_denovo_4848	2264	-	1285045	1287308
M. shigaense_orf01803	633	-	1286647	1286015	M. shigaense_denovo_4848	2264	-	1285045	1287308
M. shigaense_orf01809	495	+	1293039	1293533	M. shigaense_denovo_4762	1477	+	1292957	1294433
M. shigaense_orf01810	453	-	1293991	1293539	M. shigaense_denovo_4582	1717	-	1292957	1294673
M. shigaense_orf01811	228	+	1293942	1294169	M. shigaense_denovo_4762	1477	+	1292957	1294433
M. shigaense_orf01813	222	+	1294203	1294424	M. shigaense_denovo_4762	1477	+	1292957	1294433
M. shigaense_orf01820	765	+	1297185	1297949	M. shigaense_denovo_871	3988	+	1297120	1301107
M. shigaense_orf01821	303	+	1297946	1298248	M. shigaense_denovo_871	3988	+	1297120	1301107
M. shigaense_orf01823	222	+	1298545	1298766	M. shigaense_denovo_871	3988	+	1297120	1301107
M. shigaense_orf01825	1503	+	1298784	1300286	M. shigaense_denovo_871	3988	+	1297120	1301107
M. shigaense_orf01827	255	-	1300621	1300367	M. shigaense_denovo_755	3698	-	1297124	1300821
M. shigaense_orf01828	969	-	1301880	1300912	M. shigaense_denovo_754	3673	-	1300871	1304543
M. shigaense_orf01831	405	+	1301994	1302398	M. shigaense_denovo_873	1430	+	1301922	1303351
M. shigaense_orf01833	483	-	1302832	1302350	M. shigaense_denovo_754	3673	-	1300871	1304543
M. shigaense_orf01834	1101	-	1303929	1302829	M. shigaense_denovo_754	3673	-	1300871	1304543
M. shigaense_orf01835	612	-	1304537	1303926	M. shigaense_denovo_754	3673	-	1300871	1304543
M. shigaense_orf01836	801	+	1304618	1305418	M. shigaense_denovo_875	5496	+	1303616	1309111
M. shigaense_orf01837	1221	-	1306646	1305426	M. shigaense_denovo_753	4517	-	1304595	1309111
M. shigaense_orf01840	1539	-	1308199	1306661	M. shigaense_denovo_753	4517	-	1304595	1309111
M. shigaense_orf01842	174	+	1308239	1308412	M. shigaense_denovo_875	5496	+	1303616	1309111
M. shigaense_orf01847	261	+	1310137	1310397	M. shigaense_denovo_630	1169	+	1309944	1311112
M. shigaense_orf01848	615	-	1310998	1310384	M. shigaense_denovo_5558	1126	-	1309983	1311108
M. shigaense_orf01849	990	+	1311290	1312279	M. shigaense_denovo_631	4272	+	1311256	1315527
M. shigaense_orf01850	1191	+	1312313	1313503	M. shigaense_denovo_631	4272	+	1311256	1315527
M. shigaense_orf01851	855	+	1313598	1314452	M. shigaense_denovo_631	4272	+	1311256	1315527
M. shigaense_orf01852	309	-	1314771	1314463	M. shigaense_denovo_5557	3571	-	1311278	1314848
M. shigaense_orf01864	141	+	1327536	1327676	M. shigaense_denovo_647	5329	+	1325363	1330691
M. shigaense_orf01865	270	+	1327809	1328078	M. shigaense_denovo_647	5329	+	1325363	1330691
M. shigaense_orf01867	951	+	1328184	1329134	M. shigaense_denovo_647	5329	+	1325363	1330691
M. shigaense_orf01868	1341	-	1330514	1329174	M. shigaense_denovo_661	3057	-	1327491	1330547
M. shigaense_orf01871	1356	-	1333811	1332456	M. shigaense_denovo_657	1704	-	1332155	1333858
M. shigaense_orf01873	1023	+	1333908	1334930	M. shigaense_denovo_651	4190	+	1333888	1338077
M. shigaense_orf01874	2982	+	1335020	1338001	M. shigaense_denovo_651	4190	+	1333888	1338077
M. shigaense_orf01881	522	+	1340944	1341465	M. shigaense_denovo_2661	3021	+	1340884	1343904
M. shigaense_orf01882	1254	-	1342910	1341657	M. shigaense_denovo_2705	3294	-	1340619	1343912
M. shigaense_orf01883	129	+	1343185	1343313	M. shigaense_denovo_2661	3021	+	1340884	1343904
M. shigaense_orf01886	273	-	1345507	1345235	M. shigaense_denovo_2703	478	-	1345085	1345562
M. shigaense_orf01890	468	-	1346927	1346460	M. shigaense_denovo_226	1503	-	1346309	1347811
M. shigaense_orf01891	342	-	1347387	1347046	M. shigaense_denovo_226	1503	-	1346309	1347811
M. shigaense_orf01893	264	+	1348066	1348329	M. shigaense_denovo_6665	1093	+	1347953	1349045
M. shigaense_orf01895	141	-	1349030	1348890	M. shigaense_denovo_224	700	-	1348441	1349140
M. shigaense_orf01900	1368	+	1350106	1351473	M. shigaense_denovo_228	3760	+	1349789	1353548
M. shigaense_orf01901	117	+	1351470	1351586	M. shigaense_denovo_228	3760	+	1349789	1353548
M. shigaense_orf01903	429	+	1351634	1352062	M. shigaense_denovo_228	3760	+	1349789	1353548
M. shigaense_orf01905	687	-	1352763	1352077	M. shigaense_denovo_222	3940	-	1349614	1353553
M. shigaense_orf01907	459	-	1353506	1353048	M. shigaense_denovo_222	3940	-	1349614	1353553
M. shigaense_orf01908	372	+	1353638	1354009	M. shigaense_denovo_229	1779	+	1353605	1355383
M. shigaense_orf01910	441	-	1354526	1354086	M. shigaense_denovo_221	2344	-	1353555	1355898
M. shigaense_orf01911	615	+	1354732	1355346	M. shigaense_denovo_229	1779	+	1353605	1355383
M. shigaense_orf01921	783	+	1362059	1362841	M. shigaense_denovo_7823	1745	+	1362052	1363796
M. shigaense_orf01922	972	-	1363798	1362827	M. shigaense_denovo_7445	2061	-	1362052	1364112
M. shigaense_orf01925	528	+	1365272	1365799	M. shigaense_denovo_7096	870	+	1365067	1365936
M. shigaense_orf01927	171	+	1368022	1368192	M. shigaense_denovo_7098	231	+	1368008	1368238
M. shigaense_orf01951	519	+	1380452	1380970	M. shigaense_denovo_3226	671	+	1380355	1381025
M. shigaense_orf01953	399	-	1381507	1381109	M. shigaense_denovo_6419	514	-	1381103	1381616
M. shigaense_orf01955	435	+	1381832	1382266	M. shigaense_denovo_5791	1776	+	1381652	1383427
M. shigaense_orf01957	120	-	1382788	1382669	M. shigaense_denovo_6417	911	-	1382335	1383245
M. shigaense_orf01963	1344	-	1387544	1386201	M. shigaense_denovo_6080	1940	-	1385654	1387593
M. shigaense_orf01994	1338	-	1410802	1409465	M. shigaense_denovo_5152	5078	-	1408066	1413143
M. shigaense_orf01996	783	-	1411581	1410799	M. shigaense_denovo_5152	5078	-	1408066	1413143
M. shigaense_orf01997	1329	-	1412906	1411578	M. shigaense_denovo_5152	5078	-	1408066	1413143
M. shigaense_orf01998	555	-	1414185	1413631	M. shigaense_denovo_5151	1414	-	1413239	1414652
M. shigaense_orf02000	378	-	1414571	1414194	M. shigaense_denovo_5151	1414	-	1413239	1414652
M. shigaense_orf02002	414	-	1416280	1415867	M. shigaense_denovo_5149	1344	-	1415470	1416813
M. shigaense_orf02003	432	-	1416741	1416310	M. shigaense_denovo_5149	1344	-	1415470	1416813
M. shigaense_orf02022	429	-	1430543	1430115	M. shigaense_denovo_4919	899	-	1429729	1430627
M. shigaense_orf02023	330	+	1430665	1430994	M. shigaense_denovo_6490	1549	+	1430582	1432130
M. shigaense_orf02026	1365	-	1432476	1431112	M. shigaense_denovo_4918	1886	-	1430646	1432531
M. shigaense_orf02028	1107	+	1432660	1433766	M. shigaense_denovo_6492	1275	+	1432557	1433831
M. shigaense_orf02033	690	+	1435275	1435964	M. shigaense_denovo_2564	3965	+	1435148	1439112
M. shigaense_orf02035	894	+	1435965	1436858	M. shigaense_denovo_2564	3965	+	1435148	1439112
M. shigaense_orf02037	510	+	1436861	1437370	M. shigaense_denovo_2564	3965	+	1435148	1439112
M. shigaense_orf02038	765	+	1437448	1438212	M. shigaense_denovo_2564	3965	+	1435148	1439112
M. shigaense_orf02039	846	+	1438248	1439093	M. shigaense_denovo_2564	3965	+	1435148	1439112
M. shigaense_orf02041	129	-	1440109	1439981	M. shigaense_denovo_3186	2100	-	1439578	1441677
M. shigaense_orf02043	387	-	1443458	1443072	M. shigaense_denovo_3183	2098	-	1442161	1444258
M. shigaense_orf02049	141	-	1447499	1447359	M. shigaense_denovo_4618	859	-	1447172	1448030
M. shigaense_orf02066	135	+	1459434	1459568	M. shigaense_denovo_7551	862	+	1459131	1459992
M. shigaense_orf02069	123	-	1460719	1460597	M. shigaense_denovo_4267	283	-	1460456	1460738
M. shigaense_orf02082	213	+	1470472	1470684	M. shigaense_denovo_8648	1970	+	1470151	1472120
M. shigaense_orf02093	171	-	1479121	1478951	M. shigaense_denovo_3155	2767	-	1478754	1481520
M. shigaense_orf02094	114	+	1479332	1479445	M. shigaense_denovo_6252	2546	+	1478958	1481503
M. shigaense_orf02095	1677	+	1479574	1481250	M. shigaense_denovo_6252	2546	+	1478958	1481503
M. shigaense_orf02104	249	-	1488869	1488621	M. shigaense_denovo_5964	687	-	1488543	1489229
M. shigaense_orf02118	414	-	1498678	1498265	M. shigaense_denovo_8511	634	-	1498219	1498852
M. shigaense_orf02128	207	+	1503069	1503275	M. shigaense_denovo_8445	486	+	1503017	1503502
M. shigaense_orf02135	258	-	1508608	1508351	M. shigaense_denovo_866	1054	-	1508270	1509323
M. shigaense_orf02149	159	-	1519812	1519654	M. shigaense_denovo_8081	1160	-	1518865	1520024
M. shigaense_orf02150	1200	+	1520060	1521259	M. shigaense_denovo_4454	1375	+	1520038	1521412
M. shigaense_orf02156	249	-	1525663	1525415	M. shigaense_denovo_3643	323	-	1525346	1525668
M. shigaense_orf02160	183	-	1526448	1526266	M. shigaense_denovo_3640	2604	-	1526238	1528841
M. shigaense_orf02162	396	+	1526922	1527317	M. shigaense_denovo_7582	2223	+	1526611	1528833
M. shigaense_orf02163	1482	-	1528805	1527324	M. shigaense_denovo_3640	2604	-	1526238	1528841
M. shigaense_orf02164	651	+	1528924	1529574	M. shigaense_denovo_7583	1147	+	1528910	1530056
M. shigaense_orf02170	558	+	1532217	1532774	M. shigaense_denovo_3407	638	+	1532194	1532831
M. shigaense_orf02172	240	+	1533279	1533518	M. shigaense_denovo_3408	2986	+	1532921	1535906
M. shigaense_orf02173	450	+	1533547	1533996	M. shigaense_denovo_3408	2986	+	1532921	1535906
M. shigaense_orf02175	315	-	1536464	1536150	M. shigaense_denovo_3633	1618	-	1534904	1536521
M. shigaense_orf02178	750	+	1537763	1538512	M. shigaense_denovo_4510	4472	+	1537647	1542118
M. shigaense_orf02180	1566	+	1538671	1540236	M. shigaense_denovo_4510	4472	+	1537647	1542118
M. shigaense_orf02182	459	+	1540266	1540724	M. shigaense_denovo_4510	4472	+	1537647	1542118
M. shigaense_orf02183	930	-	1541656	1540727	M. shigaense_denovo_5195	4148	-	1537577	1541724
M. shigaense_orf02192	975	+	1546962	1547936	M. shigaense_denovo_4521	1988	+	1546868	1548855
M. shigaense_orf02193	489	+	1547975	1548463	M. shigaense_denovo_4521	1988	+	1546868	1548855
M. shigaense_orf02197	162	+	1550444	1550605	M. shigaense_denovo_4790	3989	+	1550188	1554176
M. shigaense_orf02198	309	+	1550638	1550946	M. shigaense_denovo_4790	3989	+	1550188	1554176
M. shigaense_orf02200	414	+	1551057	1551470	M. shigaense_denovo_4790	3989	+	1550188	1554176
M. shigaense_orf02201	1041	-	1552499	1551459	M. shigaense_denovo_4328	2301	-	1550552	1552852
M. shigaense_orf02221	687	+	1563291	1563977	M. shigaense_denovo_2933	2085	+	1563259	1565343
M. shigaense_orf02228	489	-	1568588	1568100	M. shigaense_denovo_3989	1783	-	1567975	1569757
M. shigaense_orf02232	507	+	1570760	1571266	M. shigaense_denovo_2940	3273	+	1569846	1573118
M. shigaense_orf02233	177	+	1571341	1571517	M. shigaense_denovo_2940	3273	+	1569846	1573118
M. shigaense_orf02234	1044	+	1571514	1572557	M. shigaense_denovo_2940	3273	+	1569846	1573118
M. shigaense_orf02239	1017	-	1575627	1574611	M. shigaense_denovo_3099	8414	-	1573790	1582203
M. shigaense_orf02241	1524	-	1577147	1575624	M. shigaense_denovo_3099	8414	-	1573790	1582203
M. shigaense_orf02242	726	-	1577869	1577144	M. shigaense_denovo_3099	8414	-	1573790	1582203
M. shigaense_orf02245	312	-	1578167	1577856	M. shigaense_denovo_3099	8414	-	1573790	1582203
M. shigaense_orf02246	324	-	1578487	1578164	M. shigaense_denovo_3099	8414	-	1573790	1582203
M. shigaense_orf02247	951	-	1579434	1578484	M. shigaense_denovo_3099	8414	-	1573790	1582203
M. shigaense_orf02248	1545	-	1580975	1579431	M. shigaense_denovo_3099	8414	-	1573790	1582203
M. shigaense_orf02249	1062	-	1582015	1580954	M. shigaense_denovo_3099	8414	-	1573790	1582203
M. shigaense_orf02251	240	+	1583760	1583999	M. shigaense_denovo_2943	2616	+	1582298	1584913
M. shigaense_orf02252	1233	-	1585265	1584033	M. shigaense_denovo_3097	1591	-	1583742	1585332
M. shigaense_orf02257	801	+	1587911	1588711	M. shigaense_denovo_2946	3999	+	1586554	1590552
M. shigaense_orf02259	957	+	1588753	1589709	M. shigaense_denovo_2946	3999	+	1586554	1590552
M. shigaense_orf02260	129	+	1589759	1589887	M. shigaense_denovo_2946	3999	+	1586554	1590552
M. shigaense_orf02264	1194	+	1591815	1593008	M. shigaense_denovo_2950	2948	+	1591769	1594716
M. shigaense_orf02265	1077	+	1593005	1594081	M. shigaense_denovo_2950	2948	+	1591769	1594716
M. shigaense_orf02268	285	+	1594208	1594492	M. shigaense_denovo_2950	2948	+	1591769	1594716
M. shigaense_orf02274	2076	+	1596289	1598364	M. shigaense_denovo_2953	2868	+	1596026	1598893
M. shigaense_orf02279	606	+	1599509	1600114	M. shigaense_denovo_2954	917	+	1599240	1600156
M. shigaense_orf02286	309	+	1605932	1606240	M. shigaense_denovo_5797	1069	+	1605427	1606495
M. shigaense_orf02288	282	+	1607841	1608122	M. shigaense_denovo_7389	675	+	1607825	1608499
M. shigaense_orf02295	1122	-	1613060	1611939	M. shigaense_denovo_2340	2813	-	1610410	1613222
M. shigaense_orf02296	759	+	1613375	1614133	M. shigaense_denovo_1140	1377	+	1613174	1614550
M. shigaense_orf02299	135	-	1614933	1614799	M. shigaense_denovo_2338	4047	-	1614649	1618695
M. shigaense_orf02301	1728	+	1614952	1616679	M. shigaense_denovo_1141	3760	+	1614642	1618401
M. shigaense_orf02304	513	+	1616732	1617244	M. shigaense_denovo_1141	3760	+	1614642	1618401
M. shigaense_orf02305	1014	+	1617273	1618286	M. shigaense_denovo_1141	3760	+	1614642	1618401
M. shigaense_orf02313	1011	+	1622061	1623071	M. shigaense_denovo_1147	3186	+	1620467	1623652
M. shigaense_orf02322	591	-	1627604	1627014	M. shigaense_denovo_2329	2311	-	1626109	1628419
M. shigaense_orf02325	1416	+	1628507	1629922	M. shigaense_denovo_1153	2267	+	1628430	1630696
M. shigaense_orf02326	597	+	1629943	1630539	M. shigaense_denovo_1153	2267	+	1628430	1630696
M. shigaense_orf02335	978	+	1638345	1639322	M. shigaense_denovo_1475	2486	+	1637823	1640308
M. shigaense_orf02336	684	+	1639342	1640025	M. shigaense_denovo_1475	2486	+	1637823	1640308
M. shigaense_orf02337	144	-	1640202	1640059	M. shigaense_denovo_503	2426	-	1637881	1640306
M. shigaense_orf02340	1677	+	1640462	1642138	M. shigaense_denovo_1477	3731	+	1640425	1644155
M. shigaense_orf02349	222	+	1645773	1645994	M. shigaense_denovo_4097	896	+	1645300	1646195
M. shigaense_orf02353	120	-	1648784	1648665	M. shigaense_denovo_8506	3048	-	1646400	1649447
M. shigaense_orf02359	846	-	1654614	1653769	M. shigaense_denovo_4184	8192	-	1652775	1660966
M. shigaense_orf02362	630	-	1655249	1654620	M. shigaense_denovo_4184	8192	-	1652775	1660966
M. shigaense_orf02364	768	+	1656404	1657171	M. shigaense_denovo_1006	5003	+	1656092	1661094
M. shigaense_orf02365	597	+	1657168	1657764	M. shigaense_denovo_1006	5003	+	1656092	1661094
M. shigaense_orf02369	441	+	1661858	1662298	M. shigaense_denovo_7149	528	+	1661830	1662357
M. shigaense_orf02381	1740	+	1680687	1682426	M. shigaense_denovo_7153	2315	+	1680505	1682819
M. shigaense_orf02393	831	-	1692331	1691501	M. shigaense_denovo_7907	1358	-	1691413	1692770
M. shigaense_orf02412	714	-	1716559	1715846	M. shigaense_denovo_2226	3960	-	1715788	1719747
M. shigaense_orf02413	738	+	1716773	1717510	M. shigaense_denovo_2573	3758	+	1716051	1719808
M. shigaense_orf02414	612	+	1717579	1718190	M. shigaense_denovo_2573	3758	+	1716051	1719808
M. shigaense_orf02415	714	+	1718187	1718900	M. shigaense_denovo_2573	3758	+	1716051	1719808
M. shigaense_orf02416	861	+	1718901	1719761	M. shigaense_denovo_2573	3758	+	1716051	1719808
M. shigaense_orf02419	285	+	1719857	1720141	M. shigaense_denovo_2574	4435	+	1719837	1724271
M. shigaense_orf02420	1914	+	1720138	1722051	M. shigaense_denovo_2574	4435	+	1719837	1724271
M. shigaense_orf02421	552	+	1722048	1722599	M. shigaense_denovo_2574	4435	+	1719837	1724271
M. shigaense_orf02422	426	+	1722633	1723058	M. shigaense_denovo_2574	4435	+	1719837	1724271
M. shigaense_orf02423	294	+	1723045	1723338	M. shigaense_denovo_2574	4435	+	1719837	1724271
M. shigaense_orf02428	138	+	1727708	1727845	M. shigaense_denovo_2434	1867	+	1727410	1729276
M. shigaense_orf02430	117	-	1727665	1727549	M. shigaense_denovo_5658	1619	-	1727089	1728707
M. shigaense_orf02431	1278	+	1727921	1729198	M. shigaense_denovo_2434	1867	+	1727410	1729276
M. shigaense_orf02432	1380	+	1729386	1730765	M. shigaense_denovo_2435	2463	+	1729295	1731757
M. shigaense_orf02433	339	+	1730762	1731100	M. shigaense_denovo_2435	2463	+	1729295	1731757
M. shigaense_orf02443	1092	+	1738003	1739094	M. shigaense_denovo_2444	7869	+	1736428	1744296
M. shigaense_orf02444	1719	+	1739148	1740866	M. shigaense_denovo_2444	7869	+	1736428	1744296
M. shigaense_orf02446	1788	+	1740941	1742728	M. shigaense_denovo_2444	7869	+	1736428	1744296
M. shigaense_orf02448	603	+	1742730	1743332	M. shigaense_denovo_2444	7869	+	1736428	1744296
M. shigaense_orf02449	882	-	1744210	1743329	M. shigaense_denovo_2137	5690	-	1738995	1744684
M. shigaense_orf02450	150	-	1744371	1744222	M. shigaense_denovo_2137	5690	-	1738995	1744684
M. shigaense_orf02454	489	+	1745402	1745890	M. shigaense_denovo_2446	1854	+	1744918	1746771
M. shigaense_orf02455	243	+	1745899	1746141	M. shigaense_denovo_2446	1854	+	1744918	1746771
M. shigaense_orf02456	528	+	1746154	1746681	M. shigaense_denovo_2446	1854	+	1744918	1746771
M. shigaense_orf02461	342	+	1748696	1749037	M. shigaense_denovo_2448	2928	+	1748495	1751422
M. shigaense_orf02462	885	+	1749116	1750000	M. shigaense_denovo_2448	2928	+	1748495	1751422
M. shigaense_orf02463	732	+	1750014	1750745	M. shigaense_denovo_2448	2928	+	1748495	1751422
M. shigaense_orf02464	306	+	1750823	1751128	M. shigaense_denovo_2448	2928	+	1748495	1751422
M. shigaense_orf02465	822	-	1751952	1751131	M. shigaense_denovo_3827	5411	-	1748161	1753571
M. shigaense_orf02467	822	+	1752146	1752967	M. shigaense_denovo_2449	2946	+	1751561	1754506
M. shigaense_orf02469	174	+	1752976	1753149	M. shigaense_denovo_2449	2946	+	1751561	1754506
M. shigaense_orf02470	396	+	1753291	1753686	M. shigaense_denovo_2449	2946	+	1751561	1754506
M. shigaense_orf02480	792	+	1767230	1768021	M. shigaense_denovo_3398	3474	+	1767161	1770634
M. shigaense_orf02481	1161	+	1768055	1769215	M. shigaense_denovo_3398	3474	+	1767161	1770634
M. shigaense_orf02483	897	+	1769248	1770144	M. shigaense_denovo_3398	3474	+	1767161	1770634
M. shigaense_orf02484	507	-	1770647	1770141	M. shigaense_denovo_1038	5360	-	1769198	1774557
M. shigaense_orf02486	846	+	1770939	1771784	M. shigaense_denovo_3399	3157	+	1770755	1773911
M. shigaense_orf02488	840	+	1771786	1772625	M. shigaense_denovo_3399	3157	+	1770755	1773911
M. shigaense_orf02493	375	-	1774484	1774110	M. shigaense_denovo_1038	5360	-	1769198	1774557
M. shigaense_orf02501	240	-	1778260	1778021	M. shigaense_denovo_2956	350	-	1778017	1778366
M. shigaense_orf02504	558	+	1779474	1780031	M. shigaense_denovo_2960	1142	+	1779251	1780392
M. shigaense_orf02508	1104	+	1780998	1782101	M. shigaense_denovo_2962	3365	+	1780637	1784001
M. shigaense_orf02510	504	+	1782160	1782663	M. shigaense_denovo_2962	3365	+	1780637	1784001
M. shigaense_orf02511	867	+	1782660	1783526	M. shigaense_denovo_2962	3365	+	1780637	1784001
M. shigaense_orf02512	255	-	1783803	1783549	M. shigaense_denovo_1502	3263	-	1780608	1783870
M. shigaense_orf02515	1221	+	1786029	1787249	M. shigaense_denovo_2966	3480	+	1785917	1789396
M. shigaense_orf02518	1161	+	1787287	1788447	M. shigaense_denovo_2966	3480	+	1785917	1789396
M. shigaense_orf02520	813	+	1788545	1789357	M. shigaense_denovo_2966	3480	+	1785917	1789396
M. shigaense_orf02524	597	+	1791384	1791980	M. shigaense_denovo_2969	1637	+	1790407	1792043
M. shigaense_orf02525	858	+	1792069	1792926	M. shigaense_denovo_2970	2385	+	1792050	1794434
M. shigaense_orf02531	756	+	1795061	1795816	M. shigaense_denovo_2971	1629	+	1794498	1796126
M. shigaense_orf02542	450	+	1802767	1803216	M. shigaense_denovo_3014	1907	+	1801949	1803855
M. shigaense_orf02545	615	+	1805071	1805685	M. shigaense_denovo_3016	1087	+	1804830	1805916
M. shigaense_orf02572	978	+	1824584	1825561	M. shigaense_denovo_4631	3927	+	1824019	1827945
M. shigaense_orf02573	678	+	1825558	1826235	M. shigaense_denovo_4631	3927	+	1824019	1827945
M. shigaense_orf02574	906	+	1826232	1827137	M. shigaense_denovo_4631	3927	+	1824019	1827945
M. shigaense_orf02583	270	+	1832507	1832776	M. shigaense_denovo_2310	8375	+	1831402	1839776
M. shigaense_orf02584	2256	+	1833150	1835405	M. shigaense_denovo_2310	8375	+	1831402	1839776
M. shigaense_orf02586	1305	+	1835449	1836753	M. shigaense_denovo_2310	8375	+	1831402	1839776
M. shigaense_orf02588	1029	+	1836758	1837786	M. shigaense_denovo_2310	8375	+	1831402	1839776
M. shigaense_orf02589	849	+	1837817	1838665	M. shigaense_denovo_2310	8375	+	1831402	1839776
M. shigaense_orf02602	732	+	1844347	1845078	M. shigaense_denovo_7997	830	+	1844319	1845148
M. shigaense_orf02614	324	-	1854908	1854585	M. shigaense_denovo_6471	1251	-	1854571	1855821
M. shigaense_orf02624	498	+	1861091	1861588	M. shigaense_denovo_6393	2912	+	1860361	1863272
M. shigaense_orf02625	687	+	1861689	1862375	M. shigaense_denovo_6393	2912	+	1860361	1863272
M. shigaense_orf02628	195	+	1864862	1865056	M. shigaense_denovo_6396	752	+	1864306	1865057
M. shigaense_orf02634	930	+	1867051	1867980	M. shigaense_denovo_166	5773	+	1866482	1872254
M. shigaense_orf02636	1686	+	1867997	1869682	M. shigaense_denovo_166	5773	+	1866482	1872254
M. shigaense_orf02637	348	-	1870082	1869735	M. shigaense_denovo_216	3158	-	1867087	1870244
M. shigaense_orf02640	1350	+	1870344	1871693	M. shigaense_denovo_166	5773	+	1866482	1872254
M. shigaense_orf02641	315	+	1871741	1872055	M. shigaense_denovo_166	5773	+	1866482	1872254
M. shigaense_orf02644	315	-	1873344	1873030	M. shigaense_denovo_212	17276	-	1872759	1890034
M. shigaense_orf02645	2223	+	1873798	1876020	M. shigaense_denovo_168	3145	+	1873522	1876666
M. shigaense_orf02646	219	-	1873776	1873558	M. shigaense_denovo_212	17276	-	1872759	1890034
M. shigaense_orf02647	498	-	1876614	1876117	M. shigaense_denovo_212	17276	-	1872759	1890034
M. shigaense_orf02649	339	+	1877391	1877729	M. shigaense_denovo_169	20225	+	1876711	1896935
M. shigaense_orf02650	828	+	1877902	1878729	M. shigaense_denovo_169	20225	+	1876711	1896935
M. shigaense_orf02652	819	+	1878748	1879566	M. shigaense_denovo_169	20225	+	1876711	1896935
M. shigaense_orf02653	432	-	1880029	1879598	M. shigaense_denovo_212	17276	-	1872759	1890034
M. shigaense_orf02654	1167	+	1880082	1881248	M. shigaense_denovo_169	20225	+	1876711	1896935
M. shigaense_orf02655	195	+	1881270	1881464	M. shigaense_denovo_169	20225	+	1876711	1896935
M. shigaense_orf02658	681	-	1882170	1881490	M. shigaense_denovo_212	17276	-	1872759	1890034
M. shigaense_orf02659	1053	+	1882504	1883556	M. shigaense_denovo_169	20225	+	1876711	1896935
M. shigaense_orf02661	522	+	1883522	1884043	M. shigaense_denovo_169	20225	+	1876711	1896935
M. shigaense_orf02662	1497	+	1884127	1885623	M. shigaense_denovo_169	20225	+	1876711	1896935
M. shigaense_orf02665	618	+	1885620	1886237	M. shigaense_denovo_169	20225	+	1876711	1896935
M. shigaense_orf02667	1221	-	1887454	1886234	M. shigaense_denovo_212	17276	-	1872759	1890034
M. shigaense_orf02668	123	+	1887940	1888062	M. shigaense_denovo_169	20225	+	1876711	1896935
M. shigaense_orf02670	963	+	1888546	1889508	M. shigaense_denovo_169	20225	+	1876711	1896935
M. shigaense_orf02671	690	+	1889539	1890228	M. shigaense_denovo_169	20225	+	1876711	1896935
M. shigaense_orf02673	960	+	1890225	1891184	M. shigaense_denovo_169	20225	+	1876711	1896935
M. shigaense_orf02675	870	+	1891189	1892058	M. shigaense_denovo_169	20225	+	1876711	1896935
M. shigaense_orf02677	1449	+	1892108	1893556	M. shigaense_denovo_169	20225	+	1876711	1896935
M. shigaense_orf02678	1161	+	1893658	1894818	M. shigaense_denovo_169	20225	+	1876711	1896935
M. shigaense_orf02681	696	-	1898280	1897585	M. shigaense_denovo_210	5939	-	1897094	1903032
M. shigaense_orf02682	501	+	1898572	1899072	M. shigaense_denovo_170	16466	+	1897143	1913608
M. shigaense_orf02683	465	+	1899230	1899694	M. shigaense_denovo_170	16466	+	1897143	1913608
M. shigaense_orf02684	486	+	1899722	1900207	M. shigaense_denovo_170	16466	+	1897143	1913608
M. shigaense_orf02686	675	-	1900887	1900213	M. shigaense_denovo_210	5939	-	1897094	1903032
M. shigaense_orf02688	1032	-	1901964	1900933	M. shigaense_denovo_210	5939	-	1897094	1903032
M. shigaense_orf02690	975	-	1902974	1902000	M. shigaense_denovo_210	5939	-	1897094	1903032
M. shigaense_orf02691	819	+	1903180	1903998	M. shigaense_denovo_170	16466	+	1897143	1913608
M. shigaense_orf02692	1437	-	1905447	1904011	M. shigaense_denovo_209	5845	-	1903188	1909032
M. shigaense_orf02693	1056	+	1905531	1906586	M. shigaense_denovo_170	16466	+	1897143	1913608
M. shigaense_orf02694	696	-	1907287	1906592	M. shigaense_denovo_209	5845	-	1903188	1909032
M. shigaense_orf02695	960	-	1908394	1907435	M. shigaense_denovo_209	5845	-	1903188	1909032
M. shigaense_orf02697	408	-	1908952	1908545	M. shigaense_denovo_209	5845	-	1903188	1909032
M. shigaense_orf02698	240	+	1909029	1909268	M. shigaense_denovo_170	16466	+	1897143	1913608
M. shigaense_orf02699	1008	-	1910276	1909269	M. shigaense_denovo_208	4571	-	1909039	1913609
M. shigaense_orf02700	186	-	1910528	1910343	M. shigaense_denovo_208	4571	-	1909039	1913609
M. shigaense_orf02701	360	+	1910693	1911052	M. shigaense_denovo_170	16466	+	1897143	1913608
M. shigaense_orf02702	378	-	1911408	1911031	M. shigaense_denovo_208	4571	-	1909039	1913609
M. shigaense_orf02703	1461	-	1913046	1911586	M. shigaense_denovo_208	4571	-	1909039	1913609
M. shigaense_orf02710	303	+	1915924	1916226	M. shigaense_denovo_176	6207	+	1915100	1921306
M. shigaense_orf02712	447	-	1916674	1916228	M. shigaense_denovo_205	5469	-	1915917	1921385
M. shigaense_orf02713	387	+	1916820	1917206	M. shigaense_denovo_176	6207	+	1915100	1921306
M. shigaense_orf02714	741	+	1917281	1918021	M. shigaense_denovo_176	6207	+	1915100	1921306
M. shigaense_orf02715	711	-	1918744	1918034	M. shigaense_denovo_205	5469	-	1915917	1921385
M. shigaense_orf02717	369	+	1918876	1919244	M. shigaense_denovo_176	6207	+	1915100	1921306
M. shigaense_orf02718	684	+	1919241	1919924	M. shigaense_denovo_176	6207	+	1915100	1921306
M. shigaense_orf02719	675	-	1920595	1919921	M. shigaense_denovo_205	5469	-	1915917	1921385
M. shigaense_orf02721	684	-	1921310	1920627	M. shigaense_denovo_205	5469	-	1915917	1921385
M. shigaense_orf02729	1914	+	1926346	1928259	M. shigaense_denovo_2617	3376	+	1926277	1929652
M. shigaense_orf02731	348	+	1928415	1928762	M. shigaense_denovo_2617	3376	+	1926277	1929652
M. shigaense_orf02732	318	-	1929698	1929381	M. shigaense_denovo_195	4539	-	1925396	1929934
M. shigaense_orf02733	528	-	1929345	1928818	M. shigaense_denovo_195	4539	-	1925396	1929934
M. shigaense_orf02736	582	-	1932965	1932384	M. shigaense_denovo_191	2065	-	1931927	1933991
M. shigaense_orf02738	1050	+	1934012	1935061	M. shigaense_denovo_2621	1678	+	1933987	1935664
M. shigaense_orf02740	696	+	1936440	1937135	M. shigaense_denovo_2622	3548	+	1935669	1939216
M. shigaense_orf02742	207	-	1937531	1937325	M. shigaense_denovo_189	1966	-	1935584	1937549
M. shigaense_orf02744	588	-	1938242	1937655	M. shigaense_denovo_188	1644	-	1937574	1939217
M. shigaense_orf02745	492	+	1938296	1938787	M. shigaense_denovo_2622	3548	+	1935669	1939216
M. shigaense_orf02755	534	-	1945228	1944695	M. shigaense_denovo_5078	674	-	1944576	1945249
M. shigaense_orf02763	306	+	1949257	1949562	M. shigaense_denovo_1847	1634	+	1949122	1950755
M. shigaense_orf02765	1008	-	1951868	1950861	M. shigaense_denovo_2061	1735	-	1950668	1952402
M. shigaense_orf02767	339	-	1952365	1952027	M. shigaense_denovo_2061	1735	-	1950668	1952402
M. shigaense_orf02769	114	+	1952748	1952861	M. shigaense_denovo_1849	1875	+	1951085	1952959
M. shigaense_orf02774	114	+	1954174	1954287	M. shigaense_denovo_1850	1631	+	1953425	1955055
M. shigaense_orf02778	387	+	1956811	1957197	M. shigaense_denovo_6801	464	+	1956806	1957269
M. shigaense_orf02779	135	+	1957328	1957462	M. shigaense_denovo_6802	210	+	1957314	1957523
M. shigaense_orf02781	537	+	1959547	1960083	M. shigaense_denovo_6808	1088	+	1959395	1960482
M. shigaense_orf02782	276	+	1960153	1960428	M. shigaense_denovo_6808	1088	+	1959395	1960482
M. shigaense_orf02784	165	-	1962000	1961836	M. shigaense_denovo_6178	777	-	1961342	1962118
M. shigaense_orf02787	120	-	1964779	1964660	M. shigaense_denovo_7717	892	-	1964002	1964893
M. shigaense_orf02796	270	-	1971599	1971330	M. shigaense_denovo_395	358	-	1971306	1971663
M. shigaense_orf02797	291	+	1972330	1972620	M. shigaense_denovo_8033	425	+	1972197	1972621
M. shigaense_orf02800	1569	-	1975220	1973652	M. shigaense_denovo_391	2653	-	1973258	1975910
M. shigaense_orf02802	564	-	1975874	1975311	M. shigaense_denovo_391	2653	-	1973258	1975910
M. shigaense_orf02807	1092	-	1979003	1977912	M. shigaense_denovo_387	2084	-	1977480	1979563
M. shigaense_orf02809	435	-	1979488	1979054	M. shigaense_denovo_387	2084	-	1977480	1979563
M. shigaense_orf02810	594	+	1979643	1980236	M. shigaense_denovo_443	1616	+	1979604	1981219
M. shigaense_orf02816	819	-	1985472	1984654	M. shigaense_denovo_379	941	-	1984581	1985521
M. shigaense_orf02818	618	+	1987257	1987874	M. shigaense_denovo_2461	1012	+	1987182	1988193
M. shigaense_orf02824	867	+	1990197	1991063	M. shigaense_denovo_2465	4163	+	1990187	1994349
M. shigaense_orf02825	624	+	1991088	1991711	M. shigaense_denovo_2465	4163	+	1990187	1994349
M. shigaense_orf02827	1935	+	1991993	1993927	M. shigaense_denovo_2465	4163	+	1990187	1994349
M. shigaense_orf02828	195	-	1991902	1991708	M. shigaense_denovo_2427	2996	-	1990204	1993199
M. shigaense_orf02831	951	+	1995344	1996294	M. shigaense_denovo_3245	1807	+	1994862	1996668
M. shigaense_orf02838	909	+	2001152	2002060	M. shigaense_denovo_3254	2678	+	2000933	2003610
M. shigaense_orf02840	837	+	2002070	2002906	M. shigaense_denovo_3254	2678	+	2000933	2003610
M. shigaense_orf02841	597	+	2002903	2003499	M. shigaense_denovo_3254	2678	+	2000933	2003610
M. shigaense_orf02844	756	+	2003713	2004468	M. shigaense_denovo_3255	1310	+	2003689	2004998
M. shigaense_orf02847	456	-	2006522	2006067	M. shigaense_denovo_3547	900	-	2005821	2006720
M. shigaense_orf02851	564	+	2008332	2008895	M. shigaense_denovo_3261	787	+	2008230	2009016
M. shigaense_orf02854	387	+	2010635	2011021	M. shigaense_denovo_3263	1393	+	2010311	2011703
M. shigaense_orf02861	1350	-	2016911	2015562	M. shigaense_denovo_1464	4325	-	2012603	2016927
M. shigaense_orf02862	327	+	2017165	2017491	M. shigaense_denovo_1513	791	+	2017080	2017870
M. shigaense_orf02866	1320	+	2019466	2020785	M. shigaense_denovo_8173	1894	+	2019115	2021008
M. shigaense_orf02870	558	+	2022479	2023036	M. shigaense_denovo_4894	4545	+	2022252	2026796
M. shigaense_orf02872	2373	+	2023132	2025504	M. shigaense_denovo_4894	4545	+	2022252	2026796
M. shigaense_orf02884	225	-	2032637	2032413	M. shigaense_denovo_8336	1294	-	2031950	2033243
M. shigaense_orf02886	426	-	2033222	2032797	M. shigaense_denovo_8336	1294	-	2031950	2033243
M. shigaense_orf02893	387	+	2038434	2038820	M. shigaense_denovo_2884	2897	+	2037378	2040274
M. shigaense_orf02895	879	-	2039729	2038851	M. shigaense_denovo_3109	2027	-	2038335	2040361
M. shigaense_orf02897	123	-	2039861	2039739	M. shigaense_denovo_3109	2027	-	2038335	2040361
M. shigaense_orf02901	435	+	2043803	2044237	M. shigaense_denovo_2892	2633	+	2043547	2046179
M. shigaense_orf02904	1074	+	2044285	2045358	M. shigaense_denovo_2892	2633	+	2043547	2046179
M. shigaense_orf02905	390	-	2045744	2045355	M. shigaense_denovo_3160	3058	-	2042949	2046006
M. shigaense_orf02927	624	-	2061792	2061169	M. shigaense_denovo_5699	2097	-	2059761	2061857
M. shigaense_orf02930	2715	+	2062546	2065260	M. shigaense_denovo_6473	4602	+	2062006	2066607
M. shigaense_orf02932	531	+	2065261	2065791	M. shigaense_denovo_6473	4602	+	2062006	2066607
M. shigaense_orf02939	1146	+	2069687	2070832	M. shigaense_denovo_3674	3971	+	2069632	2073602
M. shigaense_orf02940	552	+	2070829	2071380	M. shigaense_denovo_3674	3971	+	2069632	2073602
M. shigaense_orf02941	1086	+	2071377	2072462	M. shigaense_denovo_3674	3971	+	2069632	2073602
M. shigaense_orf02943	432	+	2072462	2072893	M. shigaense_denovo_3674	3971	+	2069632	2073602
M. shigaense_orf02946	1077	+	2073673	2074749	M. shigaense_denovo_3675	1476	+	2073665	2075140
M. shigaense_orf02948	318	+	2074813	2075130	M. shigaense_denovo_3675	1476	+	2073665	2075140
M. shigaense_orf02949	564	+	2075288	2075851	M. shigaense_denovo_3676	4019	+	2075206	2079224
M. shigaense_orf02950	519	+	2075848	2076366	M. shigaense_denovo_3676	4019	+	2075206	2079224
M. shigaense_orf02951	354	+	2076363	2076716	M. shigaense_denovo_3676	4019	+	2075206	2079224
M. shigaense_orf02955	615	+	2079783	2080397	M. shigaense_denovo_3677	3527	+	2079577	2083103
M. shigaense_orf02957	372	+	2080659	2081030	M. shigaense_denovo_3677	3527	+	2079577	2083103
M. shigaense_orf02958	534	+	2081050	2081583	M. shigaense_denovo_3677	3527	+	2079577	2083103
M. shigaense_orf02959	945	+	2081580	2082524	M. shigaense_denovo_3677	3527	+	2079577	2083103
M. shigaense_orf02967	120	+	2087901	2088020	M. shigaense_denovo_1486	6973	+	2087781	2094753
M. shigaense_orf02968	1332	+	2088081	2089412	M. shigaense_denovo_1486	6973	+	2087781	2094753
M. shigaense_orf02969	735	+	2089605	2090339	M. shigaense_denovo_1486	6973	+	2087781	2094753
M. shigaense_orf02970	681	+	2090327	2091007	M. shigaense_denovo_1486	6973	+	2087781	2094753
M. shigaense_orf02972	1338	+	2091016	2092353	M. shigaense_denovo_1486	6973	+	2087781	2094753
M. shigaense_orf02973	1188	+	2092353	2093540	M. shigaense_denovo_1486	6973	+	2087781	2094753
M. shigaense_orf02974	1086	+	2093600	2094685	M. shigaense_denovo_1486	6973	+	2087781	2094753
M. shigaense_orf02978	1071	-	2096621	2095551	M. shigaense_denovo_952	3381	-	2095430	2098810
M. shigaense_orf02979	744	-	2097408	2096665	M. shigaense_denovo_952	3381	-	2095430	2098810
M. shigaense_orf02981	1200	-	2098674	2097475	M. shigaense_denovo_952	3381	-	2095430	2098810
M. shigaense_orf02984	1170	-	2100669	2099500	M. shigaense_denovo_951	2933	-	2098983	2101915
M. shigaense_orf02988	192	-	2102918	2102727	M. shigaense_denovo_3764	1322	-	2102079	2103400
M. shigaense_orf02989	390	-	2103304	2102915	M. shigaense_denovo_3764	1322	-	2102079	2103400
M. shigaense_orf02990	1179	+	2103518	2104696	M. shigaense_denovo_4128	3152	+	2103446	2106597
M. shigaense_orf02991	648	+	2104696	2105343	M. shigaense_denovo_4128	3152	+	2103446	2106597
M. shigaense_orf02992	1119	+	2105340	2106458	M. shigaense_denovo_4128	3152	+	2103446	2106597
M. shigaense_orf03001	1167	+	2112857	2114023	M. shigaense_denovo_1353	6869	+	2111322	2118190
M. shigaense_orf03002	231	+	2114298	2114528	M. shigaense_denovo_1353	6869	+	2111322	2118190
M. shigaense_orf03003	585	-	2115092	2114508	M. shigaense_denovo_1228	5152	-	2113048	2118199
M. shigaense_orf03004	117	+	2115272	2115388	M. shigaense_denovo_1353	6869	+	2111322	2118190
M. shigaense_orf03006	1407	-	2117169	2115763	M. shigaense_denovo_1228	5152	-	2113048	2118199
M. shigaense_orf03007	867	-	2118032	2117166	M. shigaense_denovo_1228	5152	-	2113048	2118199
M. shigaense_orf03010	231	+	2119229	2119459	M. shigaense_denovo_1355	667	+	2118821	2119487
M. shigaense_orf03021	630	-	2128778	2128149	M. shigaense_denovo_1344	1265	-	2127588	2128852
M. shigaense_orf03023	576	+	2129276	2129851	M. shigaense_denovo_5726	1363	+	2128904	2130266
M. shigaense_orf03029	498	+	2132199	2132696	M. shigaense_denovo_5729	1542	+	2131555	2133096
M. shigaense_orf03035	318	+	2138476	2138793	M. shigaense_denovo_1364	5807	+	2138411	2144217
M. shigaense_orf03036	555	+	2138926	2139480	M. shigaense_denovo_1364	5807	+	2138411	2144217
M. shigaense_orf03037	333	+	2139554	2139886	M. shigaense_denovo_1364	5807	+	2138411	2144217
M. shigaense_orf03038	1251	+	2139956	2141206	M. shigaense_denovo_1364	5807	+	2138411	2144217
M. shigaense_orf03039	1212	+	2141336	2142547	M. shigaense_denovo_1364	5807	+	2138411	2144217
M. shigaense_orf03040	582	-	2143201	2142620	M. shigaense_denovo_1331	5817	-	2138408	2144224
M. shigaense_orf03044	858	+	2145115	2145972	M. shigaense_denovo_1366	2243	+	2145043	2147285
M. shigaense_orf03045	966	-	2146995	2146030	M. shigaense_denovo_1328	1649	-	2145637	2147285
M. shigaense_orf03052	483	+	2150967	2151449	M. shigaense_denovo_1369	1606	+	2150867	2152472
M. shigaense_orf03053	825	-	2152318	2151494	M. shigaense_denovo_1325	2418	-	2150883	2153300
M. shigaense_orf03056	678	+	2154871	2155548	M. shigaense_denovo_1372	5244	+	2154662	2159905
M. shigaense_orf03057	1023	+	2155545	2156567	M. shigaense_denovo_1372	5244	+	2154662	2159905
M. shigaense_orf03059	1566	-	2158138	2156573	M. shigaense_denovo_1322	5812	-	2154686	2160497
M. shigaense_orf03061	705	-	2158842	2158138	M. shigaense_denovo_1322	5812	-	2154686	2160497
M. shigaense_orf03062	603	+	2158973	2159575	M. shigaense_denovo_1372	5244	+	2154662	2159905
M. shigaense_orf03068	1269	+	2160949	2162217	M. shigaense_denovo_1375	2717	+	2160806	2163522
M. shigaense_orf03069	480	+	2162267	2162746	M. shigaense_denovo_1375	2717	+	2160806	2163522
M. shigaense_orf03070	468	+	2162743	2163210	M. shigaense_denovo_1375	2717	+	2160806	2163522
M. shigaense_orf03073	357	+	2163997	2164353	M. shigaense_denovo_1377	1597	+	2163904	2165500
M. shigaense_orf03076	909	+	2166218	2167126	M. shigaense_denovo_1378	3755	+	2165559	2169313
M. shigaense_orf03079	1077	+	2167123	2168199	M. shigaense_denovo_1378	3755	+	2165559	2169313
M. shigaense_orf03080	984	+	2168190	2169173	M. shigaense_denovo_1378	3755	+	2165559	2169313
M. shigaense_orf03088	360	+	2172863	2173222	M. shigaense_denovo_8622	699	+	2172800	2173498
M. shigaense_orf03097	1032	+	2181621	2182652	M. shigaense_denovo_3891	4467	+	2181593	2186059
M. shigaense_orf03098	1248	+	2182655	2183902	M. shigaense_denovo_3891	4467	+	2181593	2186059
M. shigaense_orf03099	786	+	2183899	2184684	M. shigaense_denovo_3891	4467	+	2181593	2186059
M. shigaense_orf03100	234	+	2184738	2184971	M. shigaense_denovo_3891	4467	+	2181593	2186059
M. shigaense_orf03105	1290	+	2186566	2187855	M. shigaense_denovo_3894	1654	+	2186340	2187993
M. shigaense_orf03107	402	-	2189159	2188758	M. shigaense_denovo_3897	797	-	2188401	2189197
M. shigaense_orf03111	750	-	2192671	2191922	M. shigaense_denovo_494	2241	-	2191866	2194106
M. shigaense_orf03112	912	-	2193579	2192668	M. shigaense_denovo_494	2241	-	2191866	2194106
M. shigaense_orf03115	1119	-	2196288	2195170	M. shigaense_denovo_492	6108	-	2194771	2200878
M. shigaense_orf03117	2091	-	2198393	2196303	M. shigaense_denovo_492	6108	-	2194771	2200878
M. shigaense_orf03118	870	+	2198706	2199575	M. shigaense_denovo_6190	6012	+	2194544	2200555
M. shigaense_orf03119	978	-	2200575	2199598	M. shigaense_denovo_492	6108	-	2194771	2200878
M. shigaense_orf03121	984	-	2202220	2201237	M. shigaense_denovo_491	1924	-	2200992	2202915
M. shigaense_orf03123	519	-	2202842	2202324	M. shigaense_denovo_491	1924	-	2200992	2202915
M. shigaense_orf03125	795	+	2202993	2203787	M. shigaense_denovo_6193	1277	+	2202980	2204256
M. shigaense_orf03126	912	-	2205490	2204579	M. shigaense_denovo_488	1979	-	2204439	2206417
M. shigaense_orf03131	1446	+	2208171	2209616	M. shigaense_denovo_519	6772	+	2207393	2214164
M. shigaense_orf03133	1185	+	2209616	2210800	M. shigaense_denovo_519	6772	+	2207393	2214164
M. shigaense_orf03135	774	+	2210800	2211573	M. shigaense_denovo_519	6772	+	2207393	2214164
M. shigaense_orf03136	1266	+	2211573	2212838	M. shigaense_denovo_519	6772	+	2207393	2214164
M. shigaense_orf03137	489	+	2212842	2213330	M. shigaense_denovo_519	6772	+	2207393	2214164
M. shigaense_orf03138	348	+	2213327	2213674	M. shigaense_denovo_519	6772	+	2207393	2214164
M. shigaense_orf03140	480	-	2214161	2213682	M. shigaense_denovo_486	7768	-	2206910	2214677
M. shigaense_orf03145	810	+	2216830	2217639	M. shigaense_denovo_1206	7107	+	2216429	2223535
M. shigaense_orf03146	1629	+	2217672	2219300	M. shigaense_denovo_1206	7107	+	2216429	2223535
M. shigaense_orf03147	192	+	2219385	2219576	M. shigaense_denovo_1206	7107	+	2216429	2223535
M. shigaense_orf03148	597	-	2220169	2219573	M. shigaense_denovo_1212	7070	-	2216420	2223489
M. shigaense_orf03151	2829	-	2223017	2220189	M. shigaense_denovo_1212	7070	-	2216420	2223489
M. shigaense_orf03153	1431	+	2223994	2225424	M. shigaense_denovo_1208	5243	+	2223926	2229168
M. shigaense_orf03155	759	+	2225431	2226189	M. shigaense_denovo_1208	5243	+	2223926	2229168
M. shigaense_orf03158	1029	+	2226469	2227497	M. shigaense_denovo_1208	5243	+	2223926	2229168
M. shigaense_orf03159	960	+	2227494	2228453	M. shigaense_denovo_1208	5243	+	2223926	2229168
M. shigaense_orf03165	756	+	2230594	2231349	M. shigaense_denovo_5784	3745	+	2230385	2234129
M. shigaense_orf03166	810	+	2231364	2232173	M. shigaense_denovo_5784	3745	+	2230385	2234129
M. shigaense_orf03167	1020	+	2232190	2233209	M. shigaense_denovo_5784	3745	+	2230385	2234129
M. shigaense_orf03171	1146	+	2234685	2235830	M. shigaense_denovo_5785	2211	+	2234221	2236431
M. shigaense_orf03172	357	+	2235850	2236206	M. shigaense_denovo_5785	2211	+	2234221	2236431
M. shigaense_orf03173	300	-	2236509	2236210	M. shigaense_denovo_3208	2620	-	2234221	2236840
M. shigaense_orf03180	978	+	2242913	2243890	M. shigaense_denovo_3122	5498	+	2242330	2247827
M. shigaense_orf03181	1218	+	2244023	2245240	M. shigaense_denovo_3122	5498	+	2242330	2247827
M. shigaense_orf03182	171	+	2245342	2245512	M. shigaense_denovo_3122	5498	+	2242330	2247827
M. shigaense_orf03183	1227	+	2245580	2246806	M. shigaense_denovo_3122	5498	+	2242330	2247827
M. shigaense_orf03186	1269	+	2249408	2250676	M. shigaense_denovo_3124	2430	+	2248867	2251296
M. shigaense_orf03191	834	+	2254702	2255535	M. shigaense_denovo_3129	2285	+	2254637	2256921
M. shigaense_orf03193	1101	+	2255718	2256818	M. shigaense_denovo_3129	2285	+	2254637	2256921
M. shigaense_orf03199	1215	+	2263209	2264423	M. shigaense_denovo_4076	7455	+	2260982	2268436
M. shigaense_orf03200	837	+	2264504	2265340	M. shigaense_denovo_4076	7455	+	2260982	2268436
M. shigaense_orf03201	123	+	2265519	2265641	M. shigaense_denovo_4076	7455	+	2260982	2268436
M. shigaense_orf03202	1056	-	2266780	2265725	M. shigaense_denovo_3731	2139	-	2265273	2267411
M. shigaense_orf03204	120	+	2268517	2268636	M. shigaense_denovo_4077	866	+	2268495	2269360
M. shigaense_orf03205	336	-	2268504	2268169	M. shigaense_denovo_3730	1364	-	2267472	2268835
M. shigaense_orf03206	237	+	2268945	2269181	M. shigaense_denovo_4077	866	+	2268495	2269360
M. shigaense_orf03207	459	-	2270251	2269793	M. shigaense_denovo_3728	7665	-	2269414	2277078
M. shigaense_orf03208	183	+	2270432	2270614	M. shigaense_denovo_4078	10114	+	2269440	2279553
M. shigaense_orf03209	336	-	2272119	2271784	M. shigaense_denovo_3728	7665	-	2269414	2277078
M. shigaense_orf03210	912	-	2273628	2272717	M. shigaense_denovo_3728	7665	-	2269414	2277078
M. shigaense_orf03211	789	-	2274511	2273723	M. shigaense_denovo_3728	7665	-	2269414	2277078
M. shigaense_orf03212	741	-	2275255	2274515	M. shigaense_denovo_3728	7665	-	2269414	2277078
M. shigaense_orf03213	954	-	2276205	2275252	M. shigaense_denovo_3728	7665	-	2269414	2277078
M. shigaense_orf03217	459	-	2282793	2282335	M. shigaense_denovo_1628	3432	-	2279673	2283104
M. shigaense_orf03233	1710	+	2319829	2321538	M. shigaense_denovo_272	4431	+	2319818	2324248
M. shigaense_orf03235	579	+	2321614	2322192	M. shigaense_denovo_272	4431	+	2319818	2324248
M. shigaense_orf03238	1119	+	2322269	2323387	M. shigaense_denovo_272	4431	+	2319818	2324248
M. shigaense_orf03239	240	+	2323970	2324209	M. shigaense_denovo_272	4431	+	2319818	2324248
M. shigaense_orf03240	138	-	2324568	2324431	M. shigaense_denovo_1409	1213	-	2324300	2325512
M. shigaense_orf03246	456	+	2330828	2331283	M. shigaense_denovo_283	2501	+	2329931	2332431
M. shigaense_orf03247	885	+	2331325	2332209	M. shigaense_denovo_283	2501	+	2329931	2332431
M. shigaense_orf03250	489	+	2334331	2334819	M. shigaense_denovo_288	2185	+	2334047	2336231
M. shigaense_orf03251	570	+	2334812	2335381	M. shigaense_denovo_288	2185	+	2334047	2336231
M. shigaense_orf03252	630	-	2336028	2335399	M. shigaense_denovo_2857	2470	-	2334030	2336499
M. shigaense_orf03255	1017	+	2336768	2337784	M. shigaense_denovo_290	1887	+	2336630	2338516
M. shigaense_orf03263	177	+	2342750	2342926	M. shigaense_denovo_292	4008	+	2339240	2343247
M. shigaense_orf03269	447	+	2345858	2346304	M. shigaense_denovo_298	2714	+	2345656	2348369
M. shigaense_orf03271	1293	+	2346348	2347640	M. shigaense_denovo_298	2714	+	2345656	2348369
M. shigaense_orf03272	654	-	2348324	2347671	M. shigaense_denovo_2852	2863	-	2345497	2348359
M. shigaense_orf03281	126	+	2357168	2357293	M. shigaense_denovo_5756	3425	+	2355022	2358446
M. shigaense_orf03283	2181	-	2359482	2357302	M. shigaense_denovo_5374	3809	-	2356707	2360515
M. shigaense_orf03285	783	-	2360424	2359642	M. shigaense_denovo_5374	3809	-	2356707	2360515
M. shigaense_orf03298	285	-	2366917	2366633	M. shigaense_denovo_531	2221	-	2366482	2368702
M. shigaense_orf03299	1575	-	2368457	2366883	M. shigaense_denovo_531	2221	-	2366482	2368702
M. shigaense_orf03301	144	-	2368603	2368460	M. shigaense_denovo_531	2221	-	2366482	2368702
M. shigaense_orf03302	183	-	2368999	2368817	M. shigaense_denovo_530	352	-	2368711	2369062
M. shigaense_orf03303	1050	+	2369130	2370179	M. shigaense_denovo_4524	2016	+	2368758	2370773
M. shigaense_orf03304	228	+	2370198	2370425	M. shigaense_denovo_4524	2016	+	2368758	2370773
M. shigaense_orf03308	1341	-	2372449	2371109	M. shigaense_denovo_529	3534	-	2369070	2372603
M. shigaense_orf03310	1050	+	2373400	2374449	M. shigaense_denovo_4525	4510	+	2370783	2375292
M. shigaense_orf03313	888	+	2376005	2376892	M. shigaense_denovo_4526	1580	+	2375438	2377017
M. shigaense_orf03318	1317	+	2378553	2379869	M. shigaense_denovo_4528	6324	+	2377667	2383990
M. shigaense_orf03319	1128	+	2379866	2380993	M. shigaense_denovo_4528	6324	+	2377667	2383990
M. shigaense_orf03320	612	+	2380990	2381601	M. shigaense_denovo_4528	6324	+	2377667	2383990
M. shigaense_orf03321	597	+	2381622	2382218	M. shigaense_denovo_4528	6324	+	2377667	2383990
M. shigaense_orf03323	735	+	2382219	2382953	M. shigaense_denovo_4528	6324	+	2377667	2383990
M. shigaense_orf03325	801	+	2382961	2383761	M. shigaense_denovo_4528	6324	+	2377667	2383990
M. shigaense_orf03328	354	+	2384545	2384898	M. shigaense_denovo_4529	2653	+	2384035	2386687
M. shigaense_orf03329	1077	-	2385980	2384904	M. shigaense_denovo_2583	8070	-	2378544	2386613
M. shigaense_orf03336	681	+	2390833	2391513	M. shigaense_denovo_4533	2510	+	2390816	2393325
M. shigaense_orf03337	819	+	2391616	2392434	M. shigaense_denovo_4533	2510	+	2390816	2393325
M. shigaense_orf03339	807	+	2393759	2394565	M. shigaense_denovo_4534	2160	+	2393413	2395572
M. shigaense_orf03342	192	+	2396302	2396493	M. shigaense_denovo_1565	3375	+	2395793	2399167
M. shigaense_orf03343	471	+	2396456	2396926	M. shigaense_denovo_1565	3375	+	2395793	2399167
M. shigaense_orf03344	1335	+	2397110	2398444	M. shigaense_denovo_1565	3375	+	2395793	2399167
M. shigaense_orf03347	1701	-	2402081	2400381	M. shigaense_denovo_1556	8983	-	2399351	2408333
M. shigaense_orf03349	1596	-	2403663	2402068	M. shigaense_denovo_1556	8983	-	2399351	2408333
M. shigaense_orf03350	1041	-	2404778	2403738	M. shigaense_denovo_1556	8983	-	2399351	2408333
M. shigaense_orf03352	1455	-	2406271	2404817	M. shigaense_denovo_1556	8983	-	2399351	2408333
M. shigaense_orf03353	576	-	2406894	2406319	M. shigaense_denovo_1556	8983	-	2399351	2408333
M. shigaense_orf03359	1203	-	2410960	2409758	M. shigaense_denovo_1554	2462	-	2408932	2411393
M. shigaense_orf03364	1443	+	2414979	2416421	M. shigaense_denovo_1576	3904	+	2414398	2418301
M. shigaense_orf03366	1215	+	2416428	2417642	M. shigaense_denovo_1576	3904	+	2414398	2418301
M. shigaense_orf03368	423	-	2418061	2417639	M. shigaense_denovo_1552	4053	-	2414532	2418584
M. shigaense_orf03377	2109	+	2426476	2428584	M. shigaense_denovo_330	4910	+	2426444	2431353
M. shigaense_orf03378	1443	+	2428581	2430023	M. shigaense_denovo_330	4910	+	2426444	2431353
M. shigaense_orf03380	444	+	2431970	2432413	M. shigaense_denovo_333	7797	+	2431918	2439714
M. shigaense_orf03381	123	-	2432582	2432460	M. shigaense_denovo_416	7882	-	2431828	2439709
M. shigaense_orf03382	378	-	2433052	2432675	M. shigaense_denovo_416	7882	-	2431828	2439709
M. shigaense_orf03383	678	-	2433726	2433049	M. shigaense_denovo_416	7882	-	2431828	2439709
M. shigaense_orf03384	2916	+	2433906	2436821	M. shigaense_denovo_333	7797	+	2431918	2439714
M. shigaense_orf03385	165	-	2437247	2437083	M. shigaense_denovo_416	7882	-	2431828	2439709
M. shigaense_orf03386	885	-	2438320	2437436	M. shigaense_denovo_416	7882	-	2431828	2439709
M. shigaense_orf03387	189	-	2438642	2438454	M. shigaense_denovo_416	7882	-	2431828	2439709
M. shigaense_orf03393	705	+	2445303	2446007	M. shigaense_denovo_1983	2697	+	2445155	2447851
M. shigaense_orf03394	195	+	2446033	2446227	M. shigaense_denovo_1983	2697	+	2445155	2447851
M. shigaense_orf03396	381	+	2446311	2446691	M. shigaense_denovo_1983	2697	+	2445155	2447851
M. shigaense_orf03398	798	+	2446704	2447501	M. shigaense_denovo_1983	2697	+	2445155	2447851
M. shigaense_orf03403	738	+	2448931	2449668	M. shigaense_denovo_1985	14765	+	2448778	2463542
M. shigaense_orf03404	735	+	2449810	2450544	M. shigaense_denovo_1985	14765	+	2448778	2463542
M. shigaense_orf03405	126	+	2450595	2450720	M. shigaense_denovo_1985	14765	+	2448778	2463542
M. shigaense_orf03406	1044	+	2450681	2451724	M. shigaense_denovo_1985	14765	+	2448778	2463542
M. shigaense_orf03408	2505	+	2451724	2454228	M. shigaense_denovo_1985	14765	+	2448778	2463542
M. shigaense_orf03411	1026	+	2454317	2455342	M. shigaense_denovo_1985	14765	+	2448778	2463542
M. shigaense_orf03412	1215	+	2455339	2456553	M. shigaense_denovo_1985	14765	+	2448778	2463542
M. shigaense_orf03414	942	+	2456550	2457491	M. shigaense_denovo_1985	14765	+	2448778	2463542
M. shigaense_orf03417	1173	+	2457558	2458730	M. shigaense_denovo_1985	14765	+	2448778	2463542
M. shigaense_orf03418	924	+	2458727	2459650	M. shigaense_denovo_1985	14765	+	2448778	2463542
M. shigaense_orf03421	501	+	2459650	2460150	M. shigaense_denovo_1985	14765	+	2448778	2463542
M. shigaense_orf03424	1206	+	2460182	2461387	M. shigaense_denovo_1985	14765	+	2448778	2463542
M. shigaense_orf03426	1410	+	2461452	2462861	M. shigaense_denovo_1985	14765	+	2448778	2463542
M. shigaense_orf03437	1071	+	2480123	2481193	M. shigaense_denovo_2722	2748	+	2479797	2482544
M. shigaense_orf03438	210	-	2481420	2481211	M. shigaense_denovo_1644	1362	-	2480737	2482098
M. shigaense_orf03441	309	+	2484886	2485194	M. shigaense_denovo_8370	356	+	2484872	2485227
M. shigaense_orf03445	291	+	2487155	2487445	M. shigaense_denovo_8375	654	+	2486971	2487624
M. shigaense_orf03459	135	+	2502908	2503042	M. shigaense_denovo_4586	508	+	2502642	2503149
M. shigaense_orf03483	1119	+	2519038	2520156	M. shigaense_denovo_3930	4273	+	2517577	2521849
M. shigaense_orf03485	945	+	2520178	2521122	M. shigaense_denovo_3930	4273	+	2517577	2521849
M. shigaense_orf03487	624	+	2522997	2523620	M. shigaense_denovo_3931	3293	+	2522023	2525315
M. shigaense_orf03488	942	+	2523617	2524558	M. shigaense_denovo_3931	3293	+	2522023	2525315
M. shigaense_orf03489	753	-	2525335	2524583	M. shigaense_denovo_4000	1081	-	2524260	2525340
M. shigaense_orf03491	864	+	2526653	2527516	M. shigaense_denovo_3933	1375	+	2526224	2527598
M. shigaense_orf03495	747	+	2529056	2529802	M. shigaense_denovo_3936	2227	+	2528718	2530944
M. shigaense_orf03496	684	+	2529802	2530485	M. shigaense_denovo_3936	2227	+	2528718	2530944
M. shigaense_orf03501	765	+	2533942	2534706	M. shigaense_denovo_3942	3499	+	2533915	2537413
M. shigaense_orf03503	831	+	2534723	2535553	M. shigaense_denovo_3942	3499	+	2533915	2537413
M. shigaense_orf03504	777	+	2535550	2536326	M. shigaense_denovo_3942	3499	+	2533915	2537413
M. shigaense_orf03505	738	-	2537388	2536651	M. shigaense_denovo_4961	3095	-	2534300	2537394
M. shigaense_orf03508	354	-	2538099	2537746	M. shigaense_denovo_4960	514	-	2537654	2538167
M. shigaense_orf03512	324	+	2539556	2539879	M. shigaense_denovo_8095	1254	+	2539098	2540351
M. shigaense_orf03518	276	+	2543472	2543747	M. shigaense_denovo_8102	2865	+	2543250	2546114
M. shigaense_orf03519	1104	+	2543744	2544847	M. shigaense_denovo_8102	2865	+	2543250	2546114
M. shigaense_orf03521	1080	+	2544840	2545919	M. shigaense_denovo_8102	2865	+	2543250	2546114
M. shigaense_orf03522	333	-	2546248	2545916	M. shigaense_denovo_7561	1715	-	2544611	2546325
M. shigaense_orf03529	477	+	2549439	2549915	M. shigaense_denovo_1651	4604	+	2549244	2553847
M. shigaense_orf03530	312	+	2549948	2550259	M. shigaense_denovo_1651	4604	+	2549244	2553847
M. shigaense_orf03531	387	+	2550277	2550663	M. shigaense_denovo_1651	4604	+	2549244	2553847
M. shigaense_orf03534	645	-	2551505	2550861	M. shigaense_denovo_1496	4880	-	2548970	2553849
M. shigaense_orf03535	1404	-	2552938	2551535	M. shigaense_denovo_1496	4880	-	2548970	2553849
M. shigaense_orf03537	912	-	2553849	2552938	M. shigaense_denovo_1496	4880	-	2548970	2553849
M. shigaense_orf03538	468	+	2553947	2554414	M. shigaense_denovo_1652	1117	+	2553897	2555013
M. shigaense_orf03539	258	+	2554398	2554655	M. shigaense_denovo_1652	1117	+	2553897	2555013
M. shigaense_orf03544	210	+	2556821	2557030	M. shigaense_denovo_1655	906	+	2556589	2557494
M. shigaense_orf03604	816	+	2599425	2600240	M. shigaense_denovo_7487	1507	+	2599393	2600899
M. shigaense_orf03613	375	-	2606154	2605780	M. shigaense_denovo_8495	926	-	2605372	2606297
M. shigaense_orf03614	702	+	2606310	2607011	M. shigaense_denovo_802	2649	+	2605171	2607819
M. shigaense_orf03615	249	+	2607132	2607380	M. shigaense_denovo_802	2649	+	2605171	2607819
M. shigaense_orf03617	318	+	2607464	2607781	M. shigaense_denovo_802	2649	+	2605171	2607819
M. shigaense_orf03620	282	+	2610710	2610991	M. shigaense_denovo_7843	3074	+	2610401	2613474
M. shigaense_orf03623	243	+	2611100	2611342	M. shigaense_denovo_7843	3074	+	2610401	2613474
M. shigaense_orf03626	783	-	2612119	2611337	M. shigaense_denovo_7548	2694	-	2610287	2612980
M. shigaense_orf03627	792	-	2612907	2612116	M. shigaense_denovo_7548	2694	-	2610287	2612980
M. shigaense_orf03633	873	-	2617562	2616690	M. shigaense_denovo_7544	2089	-	2615497	2617585
M. shigaense_orf03637	183	-	2618796	2618614	M. shigaense_denovo_1648	2016	-	2618423	2620438
M. shigaense_orf03644	510	+	2622947	2623456	M. shigaense_denovo_6741	1842	+	2622507	2624348
M. shigaense_orf03647	846	-	2624311	2623466	M. shigaense_denovo_6347	1789	-	2622546	2624334
M. shigaense_orf03667	723	+	2635046	2635768	M. shigaense_denovo_4812	932	+	2634912	2635843
M. shigaense_orf03681	402	+	2646079	2646480	M. shigaense_denovo_6954	1023	+	2645741	2646763
M. shigaense_orf03685	477	-	2647674	2647198	M. shigaense_denovo_7696	908	-	2646803	2647710
M. shigaense_orf03692	123	-	2650964	2650842	M. shigaense_denovo_541	3408	-	2650396	2653803
M. shigaense_orf03693	159	+	2650932	2651090	M. shigaense_denovo_518	3720	+	2650078	2653797
M. shigaense_orf03694	189	-	2651773	2651585	M. shigaense_denovo_541	3408	-	2650396	2653803
M. shigaense_orf03695	153	+	2651809	2651961	M. shigaense_denovo_518	3720	+	2650078	2653797
M. shigaense_orf03697	696	-	2652659	2651964	M. shigaense_denovo_541	3408	-	2650396	2653803
M. shigaense_orf03698	828	-	2653526	2652699	M. shigaense_denovo_541	3408	-	2650396	2653803
M. shigaense_orf03708	702	-	2661042	2660341	M. shigaense_denovo_1124	4521	-	2659013	2663533
M. shigaense_orf03709	546	+	2661078	2661623	M. shigaense_denovo_882	3866	+	2659365	2663230
M. shigaense_orf03710	1398	-	2663025	2661628	M. shigaense_denovo_1124	4521	-	2659013	2663533
M. shigaense_orf03727	291	+	2676251	2676541	M. shigaense_denovo_976	2766	+	2674663	2677428
M. shigaense_orf03732	558	+	2681656	2682213	M. shigaense_denovo_982	1593	+	2681063	2682655
M. shigaense_orf03739	1416	+	2686270	2687685	M. shigaense_denovo_989	6205	+	2685966	2692170
M. shigaense_orf03741	4167	+	2687682	2691848	M. shigaense_denovo_989	6205	+	2685966	2692170
M. shigaense_orf03743	165	+	2693369	2693533	M. shigaense_denovo_992	1319	+	2692988	2694306
M. shigaense_orf03753	300	+	2700118	2700417	M. shigaense_denovo_1615	10257	+	2699723	2709979
M. shigaense_orf03754	297	+	2700693	2700989	M. shigaense_denovo_1615	10257	+	2699723	2709979
M. shigaense_orf03755	285	+	2701039	2701323	M. shigaense_denovo_1615	10257	+	2699723	2709979
M. shigaense_orf03756	927	+	2701387	2702313	M. shigaense_denovo_1615	10257	+	2699723	2709979
M. shigaense_orf03758	132	+	2702463	2702594	M. shigaense_denovo_1615	10257	+	2699723	2709979
M. shigaense_orf03759	1437	+	2702666	2704102	M. shigaense_denovo_1615	10257	+	2699723	2709979
M. shigaense_orf03761	1785	+	2704110	2705894	M. shigaense_denovo_1615	10257	+	2699723	2709979
M. shigaense_orf03763	1185	+	2705921	2707105	M. shigaense_denovo_1615	10257	+	2699723	2709979
M. shigaense_orf03764	1833	+	2707102	2708934	M. shigaense_denovo_1615	10257	+	2699723	2709979
M. shigaense_orf03769	336	+	2712082	2712417	M. shigaense_denovo_7403	1589	+	2711275	2712863
M. shigaense_orf03770	186	-	2713254	2713069	M. shigaense_denovo_498	663	-	2712643	2713305
M. shigaense_orf03776	324	+	2716314	2716637	M. shigaense_denovo_2285	2253	+	2714874	2717126
M. shigaense_orf03778	363	+	2716710	2717072	M. shigaense_denovo_2285	2253	+	2714874	2717126
M. shigaense_orf03779	702	+	2717200	2717901	M. shigaense_denovo_2286	5619	+	2717168	2722786
M. shigaense_orf03780	333	-	2718243	2717911	M. shigaense_denovo_2315	5588	-	2717163	2722750
M. shigaense_orf03781	117	-	2718361	2718245	M. shigaense_denovo_2315	5588	-	2717163	2722750
M. shigaense_orf03783	933	+	2718465	2719397	M. shigaense_denovo_2286	5619	+	2717168	2722786
M. shigaense_orf03784	687	+	2719502	2720188	M. shigaense_denovo_2286	5619	+	2717168	2722786
M. shigaense_orf03786	447	-	2720641	2720195	M. shigaense_denovo_2315	5588	-	2717163	2722750
M. shigaense_orf03787	684	+	2720754	2721437	M. shigaense_denovo_2286	5619	+	2717168	2722786
M. shigaense_orf03789	504	+	2721576	2722079	M. shigaense_denovo_2286	5619	+	2717168	2722786
M. shigaense_orf03804	465	+	2733250	2733714	M. shigaense_denovo_2302	1444	+	2732998	2734441
M. shigaense_orf03806	495	+	2734582	2735076	M. shigaense_denovo_2303	6547	+	2734496	2741042
M. shigaense_orf03807	537	+	2735456	2735992	M. shigaense_denovo_2303	6547	+	2734496	2741042
M. shigaense_orf03808	2838	+	2736288	2739125	M. shigaense_denovo_2303	6547	+	2734496	2741042
M. shigaense_orf03810	519	-	2739669	2739151	M. shigaense_denovo_1951	8442	-	2732089	2740530
M. shigaense_orf03811	492	-	2740238	2739747	M. shigaense_denovo_1951	8442	-	2732089	2740530
M. shigaense_orf03822	660	+	2745857	2746516	M. shigaense_denovo_4667	3196	+	2745200	2748395
M. shigaense_orf03826	2211	-	2750913	2748703	M. shigaense_denovo_569	9804	-	2748470	2758273
M. shigaense_orf03827	1041	-	2752215	2751175	M. shigaense_denovo_569	9804	-	2748470	2758273
M. shigaense_orf03829	1371	-	2753582	2752212	M. shigaense_denovo_569	9804	-	2748470	2758273
M. shigaense_orf03831	1437	-	2755192	2753756	M. shigaense_denovo_569	9804	-	2748470	2758273
M. shigaense_orf03832	1470	-	2756684	2755215	M. shigaense_denovo_569	9804	-	2748470	2758273
M. shigaense_orf03833	951	-	2757738	2756788	M. shigaense_denovo_569	9804	-	2748470	2758273
M. shigaense_orf03834	417	-	2758169	2757753	M. shigaense_denovo_569	9804	-	2748470	2758273
M. shigaense_orf03837	414	+	2758504	2758917	M. shigaense_denovo_2239	8313	+	2758362	2766674
M. shigaense_orf03839	297	+	2758977	2759273	M. shigaense_denovo_2239	8313	+	2758362	2766674
M. shigaense_orf03840	312	+	2759270	2759581	M. shigaense_denovo_2239	8313	+	2758362	2766674
M. shigaense_orf03842	1734	+	2759581	2761314	M. shigaense_denovo_2239	8313	+	2758362	2766674
M. shigaense_orf03844	636	+	2761320	2761955	M. shigaense_denovo_2239	8313	+	2758362	2766674
M. shigaense_orf03846	126	+	2761959	2762084	M. shigaense_denovo_2239	8313	+	2758362	2766674
M. shigaense_orf03847	672	+	2762095	2762766	M. shigaense_denovo_2239	8313	+	2758362	2766674
M. shigaense_orf03848	645	+	2762766	2763410	M. shigaense_denovo_2239	8313	+	2758362	2766674
M. shigaense_orf03849	1389	-	2764795	2763407	M. shigaense_denovo_568	8928	-	2758385	2767312
M. shigaense_orf03852	918	-	2765888	2764971	M. shigaense_denovo_568	8928	-	2758385	2767312
M. shigaense_orf03853	672	-	2766621	2765950	M. shigaense_denovo_568	8928	-	2758385	2767312
M. shigaense_orf03855	330	-	2767939	2767610	M. shigaense_denovo_567	703	-	2767352	2768054
M. shigaense_orf03857	129	-	2768476	2768348	M. shigaense_denovo_566	884	-	2768057	2768940
M. shigaense_orf03859	1122	+	2769378	2770499	M. shigaense_denovo_2246	1312	+	2769258	2770569
M. shigaense_orf03865	300	+	2771788	2772087	M. shigaense_denovo_2222	8086	+	2770939	2779024
M. shigaense_orf03866	279	+	2772228	2772506	M. shigaense_denovo_2222	8086	+	2770939	2779024
M. shigaense_orf03868	903	+	2772641	2773543	M. shigaense_denovo_2222	8086	+	2770939	2779024
M. shigaense_orf03880	2115	+	2780685	2782799	M. shigaense_denovo_543	6059	+	2780668	2786726
M. shigaense_orf03883	306	-	2783897	2783592	M. shigaense_denovo_559	13687	-	2783201	2796887
M. shigaense_orf03884	324	-	2783577	2783254	M. shigaense_denovo_559	13687	-	2783201	2796887
M. shigaense_orf03885	333	-	2784272	2783940	M. shigaense_denovo_559	13687	-	2783201	2796887
M. shigaense_orf03887	2319	-	2786677	2784359	M. shigaense_denovo_559	13687	-	2783201	2796887
M. shigaense_orf03888	825	-	2787572	2786748	M. shigaense_denovo_559	13687	-	2783201	2796887
M. shigaense_orf03889	774	+	2787665	2788438	M. shigaense_denovo_544	2068	+	2786898	2788965
M. shigaense_orf03890	552	-	2788978	2788427	M. shigaense_denovo_559	13687	-	2783201	2796887
M. shigaense_orf03891	213	+	2789138	2789350	M. shigaense_denovo_545	7766	+	2789037	2796802
M. shigaense_orf03892	1239	-	2790585	2789347	M. shigaense_denovo_559	13687	-	2783201	2796887
M. shigaense_orf03893	435	+	2790604	2791038	M. shigaense_denovo_545	7766	+	2789037	2796802
M. shigaense_orf03894	1215	-	2792249	2791035	M. shigaense_denovo_559	13687	-	2783201	2796887
M. shigaense_orf03895	537	-	2792895	2792359	M. shigaense_denovo_559	13687	-	2783201	2796887
M. shigaense_orf03896	588	-	2793508	2792921	M. shigaense_denovo_559	13687	-	2783201	2796887
M. shigaense_orf03898	963	+	2793612	2794574	M. shigaense_denovo_545	7766	+	2789037	2796802
M. shigaense_orf03899	702	+	2794584	2795285	M. shigaense_denovo_545	7766	+	2789037	2796802
M. shigaense_orf03900	444	+	2795296	2795739	M. shigaense_denovo_545	7766	+	2789037	2796802
M. shigaense_orf03901	759	+	2795756	2796514	M. shigaense_denovo_545	7766	+	2789037	2796802
M. shigaense_orf03902	192	-	2796737	2796546	M. shigaense_denovo_559	13687	-	2783201	2796887
M. shigaense_orf03903	489	+	2796990	2797478	M. shigaense_denovo_546	1459	+	2796884	2798342
M. shigaense_orf03907	495	+	2799604	2800098	M. shigaense_denovo_548	1690	+	2799223	2800912
M. shigaense_orf03912	132	+	2802755	2802886	M. shigaense_denovo_552	1252	+	2802624	2803875
M. shigaense_orf03913	459	-	2803376	2802918	M. shigaense_denovo_1697	3222	-	2802327	2805548
M. shigaense_orf03915	1299	-	2804823	2803525	M. shigaense_denovo_1697	3222	-	2802327	2805548
M. shigaense_orf03916	411	-	2805320	2804910	M. shigaense_denovo_1697	3222	-	2802327	2805548
M. shigaense_orf03918	249	-	2806454	2806206	M. shigaense_denovo_1696	1494	-	2805645	2807138
M. shigaense_orf03921	978	-	2808857	2807880	M. shigaense_denovo_1694	1404	-	2807491	2808894
M. shigaense_orf03925	552	-	2811223	2810672	M. shigaense_denovo_6177	2078	-	2810138	2812215
M. shigaense_orf03926	969	-	2812188	2811220	M. shigaense_denovo_6177	2078	-	2810138	2812215
M. shigaense_orf03929	399	+	2813820	2814218	M. shigaense_denovo_4853	3816	+	2812609	2816424
M. shigaense_orf03930	147	+	2814227	2814373	M. shigaense_denovo_4853	3816	+	2812609	2816424
M. shigaense_orf03932	228	+	2814428	2814655	M. shigaense_denovo_4853	3816	+	2812609	2816424
M. shigaense_orf03933	1131	-	2815792	2814662	M. shigaense_denovo_4373	2374	-	2813764	2816137
M. shigaense_orf03942	798	-	2821602	2820805	M. shigaense_denovo_5661	1805	-	2820749	2822553
M. shigaense_orf03945	912	-	2822526	2821615	M. shigaense_denovo_5661	1805	-	2820749	2822553
M. shigaense_orf03951	198	+	2826613	2826810	M. shigaense_denovo_1522	2505	+	2826434	2828938
M. shigaense_orf03952	402	+	2826915	2827316	M. shigaense_denovo_1522	2505	+	2826434	2828938
M. shigaense_orf03954	138	-	2827528	2827391	M. shigaense_denovo_1422	2127	-	2826767	2828893
M. shigaense_orf03955	294	+	2827773	2828066	M. shigaense_denovo_1522	2505	+	2826434	2828938
M. shigaense_orf03956	231	-	2828293	2828063	M. shigaense_denovo_1422	2127	-	2826767	2828893
M. shigaense_orf03957	231	-	2828556	2828326	M. shigaense_denovo_1422	2127	-	2826767	2828893
M. shigaense_orf03967	393	-	2833071	2832679	M. shigaense_denovo_8208	752	-	2832326	2833077
M. shigaense_orf03972	189	-	2835450	2835262	M. shigaense_denovo_4974	670	-	2835000	2835669
M. shigaense_orf03974	723	+	2836309	2837031	M. shigaense_denovo_4221	1774	+	2836259	2838032
M. shigaense_orf03977	225	+	2840014	2840238	M. shigaense_denovo_3797	644	+	2839974	2840617
M. shigaense_orf03985	132	+	2842721	2842852	M. shigaense_denovo_3069	310	+	2842564	2842873
M. shigaense_orf03991	672	+	2846605	2847276	M. shigaense_denovo_3074	3025	+	2844727	2847751
M. shigaense_orf03996	495	+	2849733	2850227	M. shigaense_denovo_3079	1559	+	2849220	2850778
M. shigaense_orf03997	312	+	2850423	2850734	M. shigaense_denovo_3079	1559	+	2849220	2850778
M. shigaense_orf04003	1185	+	2852198	2853382	M. shigaense_denovo_3082	2514	+	2851672	2854185
M. shigaense_orf04004	696	-	2854087	2853392	M. shigaense_denovo_2772	2022	-	2852116	2854137
M. shigaense_orf04008	903	+	2856127	2857029	M. shigaense_denovo_3086	1136	+	2856025	2857160
M. shigaense_orf04021	813	-	2866183	2865371	M. shigaense_denovo_820	1224	-	2865004	2866227
M. shigaense_orf04022	258	+	2866803	2867060	M. shigaense_denovo_769	1951	+	2866251	2868201
M. shigaense_orf04024	573	-	2867764	2867192	M. shigaense_denovo_819	2445	-	2866230	2868674
M. shigaense_orf04025	273	-	2868193	2867921	M. shigaense_denovo_819	2445	-	2866230	2868674
M. shigaense_orf04028	681	-	2870241	2869561	M. shigaense_denovo_817	1195	-	2869050	2870244
M. shigaense_orf04035	882	-	2876118	2875237	M. shigaense_denovo_810	4796	-	2874459	2879254
M. shigaense_orf04038	2259	-	2878565	2876307	M. shigaense_denovo_810	4796	-	2874459	2879254
M. shigaense_orf04039	375	-	2878900	2878526	M. shigaense_denovo_810	4796	-	2874459	2879254
M. shigaense_orf04047	585	-	2882930	2882346	M. shigaense_denovo_2069	823	-	2882241	2883063
M. shigaense_orf04048	123	+	2883312	2883434	M. shigaense_denovo_6342	1821	+	2882420	2884240
M. shigaense_orf04049	531	-	2883925	2883395	M. shigaense_denovo_2068	1146	-	2883102	2884247
M. shigaense_orf04053	597	-	2886814	2886218	M. shigaense_denovo_5072	881	-	2885994	2886874
M. shigaense_orf04054	819	+	2887061	2887879	M. shigaense_denovo_4839	1917	+	2887000	2888916
M. shigaense_orf04055	147	+	2887915	2888061	M. shigaense_denovo_4839	1917	+	2887000	2888916
M. shigaense_orf04061	915	-	2892651	2891737	M. shigaense_denovo_5979	1399	-	2891292	2892690
M. shigaense_orf04066	351	-	2894367	2894017	M. shigaense_denovo_5975	811	-	2893958	2894768
M. shigaense_orf04067	201	+	2894396	2894596	M. shigaense_denovo_6572	844	+	2893891	2894734
M. shigaense_orf04075	279	+	2900019	2900297	M. shigaense_denovo_6581	994	+	2899539	2900532
M. shigaense_orf04078	240	+	2902360	2902599	M. shigaense_denovo_5809	890	+	2902330	2903219
M. shigaense_orf04079	117	-	2902712	2902596	M. shigaense_denovo_6370	1122	-	2902252	2903373
M. shigaense_orf04081	246	+	2904838	2905083	M. shigaense_denovo_5811	642	+	2904493	2905134
M. shigaense_orf04102	609	+	2914952	2915560	M. shigaense_denovo_8628	683	+	2914900	2915582
M. shigaense_orf04116	888	-	2926623	2925736	M. shigaense_denovo_4909	2336	-	2925267	2927602
M. shigaense_orf04117	915	-	2927596	2926682	M. shigaense_denovo_4909	2336	-	2925267	2927602
M. shigaense_orf04118	813	+	2927855	2928667	M. shigaense_denovo_5263	2286	+	2927751	2930036
M. shigaense_orf04121	294	+	2930856	2931149	M. shigaense_denovo_5265	3861	+	2930846	2934706
M. shigaense_orf04123	657	-	2933600	2932944	M. shigaense_denovo_6615	1744	-	2932191	2933934
M. shigaense_orf04127	171	-	2937937	2937767	M. shigaense_denovo_6608	1776	-	2936192	2937967
M. shigaense_orf04136	126	-	2944537	2944412	M. shigaense_denovo_5611	1205	-	2943862	2945066
M. shigaense_orf04144	279	+	2948608	2948886	M. shigaense_denovo_5005	847	+	2948113	2948959
M. shigaense_orf04147	342	+	2950189	2950530	M. shigaense_denovo_5007	1565	+	2949786	2951350
M. shigaense_orf04164	267	+	2960713	2960979	M. shigaense_denovo_6317	372	+	2960652	2961023
M. shigaense_orf04169	1182	-	2963922	2962741	M. shigaense_denovo_8223	2398	-	2962435	2964832
M. shigaense_orf04184	456	-	2977339	2976884	M. shigaense_denovo_4792	2191	-	2976468	2978658
M. shigaense_orf04186	804	-	2978289	2977486	M. shigaense_denovo_4792	2191	-	2976468	2978658
M. shigaense_orf04187	267	-	2978567	2978301	M. shigaense_denovo_4792	2191	-	2976468	2978658
M. shigaense_orf04199	171	-	2985104	2984934	M. shigaense_denovo_8111	1113	-	2984170	2985282
M. shigaense_orf04203	981	+	2988115	2989095	M. shigaense_denovo_5851	1516	+	2988065	2989580
M. shigaense_orf04204	219	+	2989127	2989345	M. shigaense_denovo_5851	1516	+	2988065	2989580
M. shigaense_orf04208	117	-	2990406	2990290	M. shigaense_denovo_7216	686	-	2990191	2990876
M. shigaense_orf04213	360	-	2991514	2991155	M. shigaense_denovo_7214	842	-	2990967	2991808
M. shigaense_orf04235	486	+	3009419	3009904	M. shigaense_denovo_4977	1265	+	3009382	3010646
M. shigaense_orf04269	576	-	3029702	3029127	M. shigaense_denovo_7870	1139	-	3028643	3029781
M. shigaense_orf04275	990	-	3035395	3034406	M. shigaense_denovo_7277	1975	-	3034005	3035979
M. shigaense_orf04280	1011	-	3040069	3039059	M. shigaense_denovo_7274	2737	-	3038554	3041290
M. shigaense_orf04281	1185	-	3041250	3040066	M. shigaense_denovo_7274	2737	-	3038554	3041290
M. shigaense_orf04295	801	-	3049040	3048240	M. shigaense_denovo_5206	1677	-	3047915	3049591
M. shigaense_orf04299	492	-	3051054	3050563	M. shigaense_denovo_5205	2015	-	3049650	3051664
M. shigaense_orf04313	132	+	3073966	3074097	M. shigaense_denovo_2682	7919	+	3073651	3081569
M. shigaense_orf04314	117	-	3074237	3074121	M. shigaense_denovo_2624	977	-	3073689	3074665
M. shigaense_orf04315	303	-	3074630	3074328	M. shigaense_denovo_2624	977	-	3073689	3074665
M. shigaense_orf04316	297	+	3074872	3075168	M. shigaense_denovo_2682	7919	+	3073651	3081569
M. shigaense_orf04317	795	-	3075975	3075181	M. shigaense_denovo_2623	5485	-	3074703	3080187
M. shigaense_orf04318	2007	-	3077978	3075972	M. shigaense_denovo_2623	5485	-	3074703	3080187
M. shigaense_orf04319	1599	-	3079641	3078043	M. shigaense_denovo_2623	5485	-	3074703	3080187
M. shigaense_orf04323	699	+	3080279	3080977	M. shigaense_denovo_2682	7919	+	3073651	3081569
M. shigaense_orf04325	381	-	3082220	3081840	M. shigaense_denovo_7319	916	-	3081337	3082252
M. shigaense_orf04327	288	-	3086237	3085950	M. shigaense_denovo_7313	1560	-	3085343	3086902
M. shigaense_orf04329	336	-	3086801	3086466	M. shigaense_denovo_7313	1560	-	3085343	3086902
M. shigaense_orf04335	132	+	3091809	3091940	M. shigaense_denovo_4307	336	+	3091715	3092050
M. shigaense_orf04343	414	+	3096135	3096548	M. shigaense_denovo_4318	1540	+	3095680	3097219
M. shigaense_orf04344	228	-	3096783	3096556	M. shigaense_denovo_3860	1575	-	3095743	3097317
M. shigaense_orf04349	120	+	3100942	3101061	M. shigaense_denovo_8259	826	+	3100777	3101602
M. shigaense_orf04357	306	+	3105588	3105893	M. shigaense_denovo_711	625	+	3105509	3106133
M. shigaense_orf04361	774	-	3108871	3108098	M. shigaense_denovo_719	1929	-	3107190	3109118
M. shigaense_orf04365	969	-	3112676	3111708	M. shigaense_denovo_718	10211	-	3109179	3119389
M. shigaense_orf04366	267	-	3112987	3112721	M. shigaense_denovo_718	10211	-	3109179	3119389
M. shigaense_orf04367	963	-	3114021	3113059	M. shigaense_denovo_718	10211	-	3109179	3119389
M. shigaense_orf04369	1008	-	3115078	3114071	M. shigaense_denovo_718	10211	-	3109179	3119389
M. shigaense_orf04371	1344	-	3116509	3115166	M. shigaense_denovo_718	10211	-	3109179	3119389
M. shigaense_orf04373	789	-	3117493	3116705	M. shigaense_denovo_718	10211	-	3109179	3119389
M. shigaense_orf04376	900	-	3118389	3117490	M. shigaense_denovo_718	10211	-	3109179	3119389
M. shigaense_orf04378	195	-	3118580	3118386	M. shigaense_denovo_718	10211	-	3109179	3119389
M. shigaense_orf04383	606	+	3121607	3122212	M. shigaense_denovo_1256	4255	+	3120535	3124789
M. shigaense_orf04384	1899	-	3124153	3122255	M. shigaense_denovo_1201	4085	-	3121075	3125159
M. shigaense_orf04385	150	+	3124240	3124389	M. shigaense_denovo_1256	4255	+	3120535	3124789
M. shigaense_orf04396	318	-	3130284	3129967	M. shigaense_denovo_4092	1664	-	3129344	3131007
M. shigaense_orf04398	603	-	3130917	3130315	M. shigaense_denovo_4092	1664	-	3129344	3131007
M. shigaense_orf04411	696	+	3140269	3140964	M. shigaense_denovo_4120	1392	+	3140048	3141439
M. shigaense_orf04421	129	+	3150348	3150476	M. shigaense_denovo_1860	1617	+	3150315	3151931
M. shigaense_orf04422	132	+	3150431	3150562	M. shigaense_denovo_1860	1617	+	3150315	3151931
M. shigaense_orf04427	1212	-	3154145	3152934	M. shigaense_denovo_4476	2577	-	3152822	3155398
M. shigaense_orf04428	813	-	3155109	3154297	M. shigaense_denovo_4476	2577	-	3152822	3155398
M. shigaense_orf04430	588	-	3156536	3155949	M. shigaense_denovo_1768	2888	-	3155549	3158436
M. shigaense_orf04431	780	-	3157392	3156613	M. shigaense_denovo_1768	2888	-	3155549	3158436
M. shigaense_orf04432	303	-	3157731	3157429	M. shigaense_denovo_1768	2888	-	3155549	3158436
M. shigaense_orf04434	258	+	3158919	3159176	M. shigaense_denovo_1863	1125	+	3158777	3159901
M. shigaense_orf04441	138	-	3162469	3162332	M. shigaense_denovo_7141	2344	-	3162321	3164664
M. shigaense_orf04443	531	-	3163018	3162488	M. shigaense_denovo_7141	2344	-	3162321	3164664
M. shigaense_orf04444	150	+	3164372	3164521	M. shigaense_denovo_1871	852	+	3163811	3164662
M. shigaense_orf04445	1347	-	3164401	3163055	M. shigaense_denovo_7141	2344	-	3162321	3164664
M. shigaense_orf04448	234	-	3166880	3166647	M. shigaense_denovo_3151	994	-	3166505	3167498
M. shigaense_orf04449	177	+	3166941	3167117	M. shigaense_denovo_3460	1206	+	3166519	3167724
M. shigaense_orf04455	606	+	3170848	3171453	M. shigaense_denovo_3466	12504	+	3170156	3182659
M. shigaense_orf04457	330	-	3171799	3171470	M. shigaense_denovo_3147	3774	-	3170474	3174247
M. shigaense_orf04460	762	-	3172655	3171894	M. shigaense_denovo_3147	3774	-	3170474	3174247
M. shigaense_orf04461	288	-	3173222	3172935	M. shigaense_denovo_3147	3774	-	3170474	3174247
M. shigaense_orf04463	657	-	3174036	3173380	M. shigaense_denovo_3147	3774	-	3170474	3174247
M. shigaense_orf04465	708	-	3175611	3174904	M. shigaense_denovo_3146	3298	-	3174277	3177574
M. shigaense_orf04467	1167	-	3176815	3175649	M. shigaense_denovo_3146	3298	-	3174277	3177574
M. shigaense_orf04468	1500	-	3179466	3177967	M. shigaense_denovo_3143	4795	-	3177836	3182630
M. shigaense_orf04471	1191	-	3180653	3179463	M. shigaense_denovo_3143	4795	-	3177836	3182630
M. shigaense_orf04473	1719	-	3182416	3180698	M. shigaense_denovo_3143	4795	-	3177836	3182630
M. shigaense_orf04479	615	-	3188778	3188164	M. shigaense_denovo_8603	1043	-	3187768	3188810
M. shigaense_orf04483	621	-	3190754	3190134	M. shigaense_denovo_8601	1795	-	3189246	3191040
M. shigaense_orf04487	1809	-	3197068	3195260	M. shigaense_denovo_1458	5638	-	3194565	3200202
M. shigaense_orf04489	909	-	3198231	3197323	M. shigaense_denovo_1458	5638	-	3194565	3200202
M. shigaense_orf04490	147	+	3199596	3199742	M. shigaense_denovo_1530	5088	+	3195128	3200215
M. shigaense_orf04491	1041	-	3199577	3198537	M. shigaense_denovo_1458	5638	-	3194565	3200202
M. shigaense_orf04492	432	-	3200166	3199735	M. shigaense_denovo_1458	5638	-	3194565	3200202
M. shigaense_orf04493	402	-	3200936	3200535	M. shigaense_denovo_1457	697	-	3200391	3201087
M. shigaense_orf04495	648	+	3202027	3202674	M. shigaense_denovo_1533	2261	+	3201360	3203620
M. shigaense_orf04498	897	-	3203567	3202671	M. shigaense_denovo_1456	2526	-	3201099	3203624
M. shigaense_orf04509	1386	-	3210966	3209581	M. shigaense_denovo_3774	2387	-	3209018	3211404
M. shigaense_orf04511	888	-	3212447	3211560	M. shigaense_denovo_3773	3244	-	3211410	3214653
M. shigaense_orf04512	1281	+	3212581	3213861	M. shigaense_denovo_1542	2916	+	3212391	3215306
M. shigaense_orf04514	747	-	3214604	3213858	M. shigaense_denovo_3773	3244	-	3211410	3214653
M. shigaense_orf04518	438	-	3216795	3216358	M. shigaense_denovo_3770	1649	-	3215622	3217270
M. shigaense_orf04521	1800	+	3217461	3219260	M. shigaense_denovo_1544	2560	+	3217368	3219927
M. shigaense_orf04529	522	+	3226285	3226806	M. shigaense_denovo_2507	6509	+	3226152	3232660
M. shigaense_orf04530	870	+	3226849	3227718	M. shigaense_denovo_2507	6509	+	3226152	3232660
M. shigaense_orf04531	1197	+	3227715	3228911	M. shigaense_denovo_2507	6509	+	3226152	3232660
M. shigaense_orf04534	1668	+	3228908	3230575	M. shigaense_denovo_2507	6509	+	3226152	3232660
M. shigaense_orf04535	465	-	3231036	3230572	M. shigaense_denovo_2533	8549	-	3226152	3234700
M. shigaense_orf04536	642	-	3232011	3231370	M. shigaense_denovo_2533	8549	-	3226152	3234700
M. shigaense_orf04537	915	-	3232925	3232011	M. shigaense_denovo_2533	8549	-	3226152	3234700
M. shigaense_orf04538	420	-	3233575	3233156	M. shigaense_denovo_2533	8549	-	3226152	3234700
M. shigaense_orf04540	1101	-	3234685	3233585	M. shigaense_denovo_2533	8549	-	3226152	3234700
M. shigaense_orf04542	1947	+	3234841	3236787	M. shigaense_denovo_2509	5340	+	3234801	3240140
M. shigaense_orf04543	975	-	3237785	3236811	M. shigaense_denovo_2532	4381	-	3234748	3239128
M. shigaense_orf04544	576	+	3238010	3238585	M. shigaense_denovo_2509	5340	+	3234801	3240140
M. shigaense_orf04545	357	-	3238971	3238615	M. shigaense_denovo_2532	4381	-	3234748	3239128
M. shigaense_orf04549	537	+	3241022	3241558	M. shigaense_denovo_4186	4138	+	3240334	3244471
M. shigaense_orf04550	1059	+	3241558	3242616	M. shigaense_denovo_4186	4138	+	3240334	3244471
M. shigaense_orf04552	753	+	3242613	3243365	M. shigaense_denovo_4186	4138	+	3240334	3244471
M. shigaense_orf04557	477	-	3248266	3247790	M. shigaense_denovo_2526	1543	-	3246776	3248318
M. shigaense_orf04562	1812	+	3250753	3252564	M. shigaense_denovo_5349	2470	+	3250723	3253192
M. shigaense_orf04567	699	+	3253962	3254660	M. shigaense_denovo_3801	5173	+	3253707	3258879
M. shigaense_orf04568	918	+	3254684	3255601	M. shigaense_denovo_3801	5173	+	3253707	3258879
M. shigaense_orf04570	756	+	3255626	3256381	M. shigaense_denovo_3801	5173	+	3253707	3258879
M. shigaense_orf04572	420	-	3256817	3256398	M. shigaense_denovo_4099	4792	-	3253719	3258510
M. shigaense_orf04573	1437	+	3257040	3258476	M. shigaense_denovo_3801	5173	+	3253707	3258879
M. shigaense_orf04580	198	-	3261702	3261505	M. shigaense_denovo_113	1551	-	3260956	3262506
M. shigaense_orf04581	228	-	3262013	3261786	M. shigaense_denovo_113	1551	-	3260956	3262506
M. shigaense_orf04589	1341	-	3267933	3266593	M. shigaense_denovo_110	2845	-	3265986	3268830
M. shigaense_orf04602	180	+	3277128	3277307	M. shigaense_denovo_8664	591	+	3277094	3277684
M. shigaense_orf04614	678	+	3282979	3283656	M. shigaense_denovo_8673	1410	+	3282877	3284286
M. shigaense_orf04616	492	+	3283649	3284140	M. shigaense_denovo_8673	1410	+	3282877	3284286
M. shigaense_orf04625	171	+	3291184	3291354	M. shigaense_denovo_8042	977	+	3291146	3292122
M. shigaense_orf04647	366	-	3314067	3313702	M. shigaense_denovo_3040	2054	-	3313384	3315437
M. shigaense_orf04649	702	-	3315388	3314687	M. shigaense_denovo_3040	2054	-	3313384	3315437
M. shigaense_orf04657	423	-	3323336	3322914	M. shigaense_denovo_7557	1215	-	3322776	3323990
M. shigaense_orf04658	528	-	3323943	3323416	M. shigaense_denovo_7557	1215	-	3322776	3323990
M. shigaense_orf04663	909	+	3328511	3329419	M. shigaense_denovo_930	2794	+	3327797	3330590
M. shigaense_orf04664	345	+	3329496	3329840	M. shigaense_denovo_930	2794	+	3327797	3330590
M. shigaense_orf04672	666	-	3336228	3335563	M. shigaense_denovo_4322	3900	-	3334510	3338409
M. shigaense_orf04674	1533	-	3337855	3336323	M. shigaense_denovo_4322	3900	-	3334510	3338409
M. shigaense_orf04677	948	+	3340058	3341005	M. shigaense_denovo_936	4487	+	3338453	3342939
M. shigaense_orf04680	507	+	3341074	3341580	M. shigaense_denovo_936	4487	+	3338453	3342939
M. shigaense_orf04681	732	+	3341606	3342337	M. shigaense_denovo_936	4487	+	3338453	3342939
M. shigaense_orf04682	513	-	3342856	3342344	M. shigaense_denovo_1747	4487	-	3338453	3342939
M. shigaense_orf04685	300	-	3344120	3343821	M. shigaense_denovo_1746	2115	-	3343055	3345169
M. shigaense_orf04701	369	+	3354118	3354486	M. shigaense_denovo_7537	619	+	3354082	3354700
M. shigaense_orf04732	480	-	3371510	3371031	M. shigaense_denovo_5300	3540	-	3370551	3374090
M. shigaense_orf04733	327	-	3371901	3371575	M. shigaense_denovo_5300	3540	-	3370551	3374090
M. shigaense_orf04734	300	+	3371900	3372199	M. shigaense_denovo_5647	3902	+	3369557	3373458
M. shigaense_orf04745	144	+	3378869	3379012	M. shigaense_denovo_6817	309	+	3378712	3379020
M. shigaense_orf04746	357	-	3378864	3378508	M. shigaense_denovo_5292	420	-	3378477	3378896
M. shigaense_orf04747	837	+	3379069	3379905	M. shigaense_denovo_6818	1556	+	3379030	3380585
M. shigaense_orf04748	855	-	3380768	3379914	M. shigaense_denovo_8178	2577	-	3379075	3381651
M. shigaense_orf04766	540	+	3393171	3393710	M. shigaense_denovo_6234	2126	+	3392903	3395028
M. shigaense_orf04767	1176	-	3394902	3393727	M. shigaense_denovo_6148	2876	-	3392706	3395581
M. shigaense_orf04776	195	-	3401155	3400961	M. shigaense_denovo_6543	3807	-	3400892	3404698
M. shigaense_orf04777	318	+	3401217	3401534	M. shigaense_denovo_5180	4540	+	3400464	3405003
M. shigaense_orf04779	279	-	3401883	3401605	M. shigaense_denovo_6543	3807	-	3400892	3404698
M. shigaense_orf04780	216	-	3402343	3402128	M. shigaense_denovo_6543	3807	-	3400892	3404698
M. shigaense_orf04782	1926	-	3404340	3402415	M. shigaense_denovo_6543	3807	-	3400892	3404698
M. shigaense_orf04809	396	-	3427858	3427463	M. shigaense_denovo_6916	1462	-	3426756	3428217
M. shigaense_orf04816	1410	+	3432362	3433771	M. shigaense_denovo_7145	2333	+	3432348	3434680
M. shigaense_orf04821	990	-	3438534	3437545	M. shigaense_denovo_5531	2162	-	3436489	3438650
M. shigaense_orf04827	504	-	3443891	3443388	M. shigaense_denovo_3625	1046	-	3443346	3444391
M. shigaense_orf04828	1185	+	3444087	3445271	M. shigaense_denovo_4028	7071	+	3443935	3451005
M. shigaense_orf04829	1251	-	3446558	3445308	M. shigaense_denovo_3623	1627	-	3444995	3446621
M. shigaense_orf04830	627	+	3446658	3447284	M. shigaense_denovo_4028	7071	+	3443935	3451005
M. shigaense_orf04831	927	+	3447507	3448433	M. shigaense_denovo_4028	7071	+	3443935	3451005
M. shigaense_orf04833	951	+	3449671	3450621	M. shigaense_denovo_4028	7071	+	3443935	3451005
M. shigaense_orf04834	1314	-	3451943	3450630	M. shigaense_denovo_3619	2633	-	3449617	3452249
M. shigaense_orf04835	129	-	3452133	3452005	M. shigaense_denovo_3619	2633	-	3449617	3452249
M. shigaense_orf04838	249	+	3454314	3454562	M. shigaense_denovo_7440	467	+	3454216	3454682
M. shigaense_orf04839	174	+	3455671	3455844	M. shigaense_denovo_7441	1955	+	3454756	3456710
M. shigaense_orf04844	291	-	3457824	3457534	M. shigaense_denovo_3617	450	-	3457518	3457967
M. shigaense_orf04846	438	+	3458254	3458691	M. shigaense_denovo_4033	913	+	3458133	3459045
M. shigaense_orf04856	1233	-	3468344	3467112	M. shigaense_denovo_3350	3052	-	3466171	3469222
M. shigaense_orf04858	798	-	3469138	3468341	M. shigaense_denovo_3350	3052	-	3466171	3469222
M. shigaense_orf04860	447	+	3469349	3469795	M. shigaense_denovo_3446	5680	+	3469290	3474969
M. shigaense_orf04863	453	-	3472051	3471599	M. shigaense_denovo_3348	4436	-	3470571	3475006
M. shigaense_orf04865	855	-	3472943	3472089	M. shigaense_denovo_3348	4436	-	3470571	3475006
M. shigaense_orf04866	2043	-	3474982	3472940	M. shigaense_denovo_3348	4436	-	3470571	3475006
M. shigaense_orf04867	489	+	3475101	3475589	M. shigaense_denovo_3447	1215	+	3474986	3476200
M. shigaense_orf04903	147	-	3501932	3501786	M. shigaense_denovo_3846	234	-	3501723	3501956
M. shigaense_orf04905	1875	-	3504073	3502199	M. shigaense_denovo_3845	6216	-	3502153	3508368
M. shigaense_orf04907	924	-	3505031	3504108	M. shigaense_denovo_3845	6216	-	3502153	3508368
M. shigaense_orf04908	1266	+	3505395	3506660	M. shigaense_denovo_3590	6500	+	3501968	3508467
M. shigaense_orf04909	933	+	3506647	3507579	M. shigaense_denovo_3590	6500	+	3501968	3508467
M. shigaense_orf04910	687	+	3507582	3508268	M. shigaense_denovo_3590	6500	+	3501968	3508467
M. shigaense_orf04912	690	-	3509504	3508815	M. shigaense_denovo_3844	1025	-	3508578	3509602
M. shigaense_orf04917	447	+	3511925	3512371	M. shigaense_denovo_3601	1578	+	3511786	3513363
M. shigaense_orf04918	267	+	3512712	3512978	M. shigaense_denovo_3601	1578	+	3511786	3513363
M. shigaense_orf04922	600	-	3515527	3514928	M. shigaense_denovo_4999	2659	-	3513613	3516271
M. shigaense_orf04927	162	-	3519041	3518880	M. shigaense_denovo_1733	1109	-	3518093	3519201
M. shigaense_orf04929	1176	-	3520896	3519721	M. shigaense_denovo_1732	1363	-	3519627	3520989
M. shigaense_orf04945	978	-	3530102	3529125	M. shigaense_denovo_1718	10615	-	3528945	3539559
M. shigaense_orf04946	1305	-	3531393	3530089	M. shigaense_denovo_1718	10615	-	3528945	3539559
M. shigaense_orf04947	534	-	3531923	3531390	M. shigaense_denovo_1718	10615	-	3528945	3539559
M. shigaense_orf04950	1059	-	3533000	3531942	M. shigaense_denovo_1718	10615	-	3528945	3539559
M. shigaense_orf04952	807	-	3533863	3533057	M. shigaense_denovo_1718	10615	-	3528945	3539559
M. shigaense_orf04954	1155	-	3535027	3533873	M. shigaense_denovo_1718	10615	-	3528945	3539559
M. shigaense_orf04955	342	+	3536291	3536632	M. shigaense_denovo_1902	10695	+	3528450	3539144
M. shigaense_orf04956	174	+	3536694	3536867	M. shigaense_denovo_1902	10695	+	3528450	3539144
M. shigaense_orf04957	240	+	3536864	3537103	M. shigaense_denovo_1902	10695	+	3528450	3539144
M. shigaense_orf04958	1059	-	3536164	3535106	M. shigaense_denovo_1718	10615	-	3528945	3539559
M. shigaense_orf04959	534	-	3537633	3537100	M. shigaense_denovo_1718	10615	-	3528945	3539559
M. shigaense_orf04960	525	-	3538199	3537675	M. shigaense_denovo_1718	10615	-	3528945	3539559
M. shigaense_orf04961	228	-	3538574	3538347	M. shigaense_denovo_1718	10615	-	3528945	3539559
M. shigaense_orf04974	1299	-	3555104	3553806	M. shigaense_denovo_6645	1581	-	3553586	3555166
M. shigaense_orf04985	1350	-	3566609	3565260	M. shigaense_denovo_2126	1700	-	3564936	3566635
M. shigaense_orf04986	150	-	3567201	3567052	M. shigaense_denovo_2125	739	-	3566642	3567380
M. shigaense_orf04990	1668	+	3571776	3573443	M. shigaense_denovo_1927	5940	+	3569676	3575615
M. shigaense_orf04991	741	+	3573440	3574180	M. shigaense_denovo_1927	5940	+	3569676	3575615
M. shigaense_orf04992	735	+	3574159	3574893	M. shigaense_denovo_1927	5940	+	3569676	3575615
M. shigaense_orf04993	1062	-	3575956	3574895	M. shigaense_denovo_2121	4955	-	3571521	3576475
M. shigaense_orf04998	204	-	3579255	3579052	M. shigaense_denovo_2115	1248	-	3578456	3579703
M. shigaense_orf05003	1740	-	3585157	3583418	M. shigaense_denovo_2107	2079	-	3583226	3585304
M. shigaense_orf05009	840	-	3589462	3588623	M. shigaense_denovo_3067	1281	-	3588348	3589628
M. shigaense_orf05013	261	+	3592296	3592556	M. shigaense_denovo_3173	1730	+	3591785	3593514
M. shigaense_orf05021	1161	+	3596134	3597294	M. shigaense_denovo_3177	3432	+	3595967	3599398
M. shigaense_orf05022	1107	+	3597302	3598408	M. shigaense_denovo_3177	3432	+	3595967	3599398
M. shigaense_orf05025	387	+	3600958	3601344	M. shigaense_denovo_3180	1169	+	3600279	3601447
M. shigaense_orf05031	399	-	3607012	3606614	M. shigaense_denovo_6363	1118	-	3606183	3607300
M. shigaense_orf05037	876	-	3610101	3609226	M. shigaense_denovo_6357	2557	-	3608832	3611388
M. shigaense_orf05039	1167	-	3611305	3610139	M. shigaense_denovo_6357	2557	-	3608832	3611388
M. shigaense_orf05068	1104	-	3634780	3633677	M. shigaense_denovo_2452	12091	-	3633050	3645140
M. shigaense_orf05069	1443	-	3636219	3634777	M. shigaense_denovo_2452	12091	-	3633050	3645140
M. shigaense_orf05071	267	-	3636529	3636263	M. shigaense_denovo_2452	12091	-	3633050	3645140
M. shigaense_orf05072	312	-	3636854	3636543	M. shigaense_denovo_2452	12091	-	3633050	3645140
M. shigaense_orf05073	135	+	3639722	3639856	M. shigaense_denovo_2559	12459	+	3633045	3645503
M. shigaense_orf05074	2622	-	3639715	3637094	M. shigaense_denovo_2452	12091	-	3633050	3645140
M. shigaense_orf05075	411	-	3640614	3640204	M. shigaense_denovo_2452	12091	-	3633050	3645140
M. shigaense_orf05077	327	-	3640971	3640645	M. shigaense_denovo_2452	12091	-	3633050	3645140
M. shigaense_orf05078	1440	-	3642473	3641034	M. shigaense_denovo_2452	12091	-	3633050	3645140
M. shigaense_orf05079	2658	-	3645127	3642470	M. shigaense_denovo_2452	12091	-	3633050	3645140
M. shigaense_orf05084	1095	-	3649886	3648792	M. shigaense_denovo_1081	4497	-	3648387	3652883
M. shigaense_orf05086	1968	-	3651902	3649935	M. shigaense_denovo_1081	4497	-	3648387	3652883
M. shigaense_orf05089	1281	-	3654702	3653422	M. shigaense_denovo_1080	9291	-	3652984	3662274
M. shigaense_orf05090	636	-	3655748	3655113	M. shigaense_denovo_1080	9291	-	3652984	3662274
M. shigaense_orf05091	600	-	3656344	3655745	M. shigaense_denovo_1080	9291	-	3652984	3662274
M. shigaense_orf05093	1413	-	3657874	3656462	M. shigaense_denovo_1080	9291	-	3652984	3662274
M. shigaense_orf05094	132	+	3657889	3658020	M. shigaense_denovo_1220	5159	+	3653009	3658167
M. shigaense_orf05095	1191	+	3658272	3659462	M. shigaense_denovo_1221	1569	+	3658210	3659778
M. shigaense_orf05096	276	-	3660154	3659879	M. shigaense_denovo_1080	9291	-	3652984	3662274
M. shigaense_orf05097	831	-	3661074	3660244	M. shigaense_denovo_1080	9291	-	3652984	3662274
M. shigaense_orf05098	480	-	3661561	3661082	M. shigaense_denovo_1080	9291	-	3652984	3662274
M. shigaense_orf05100	624	-	3662233	3661610	M. shigaense_denovo_1080	9291	-	3652984	3662274
M. shigaense_orf05104	468	-	3666093	3665626	M. shigaense_denovo_1077	1688	-	3665354	3667041
M. shigaense_orf05105	234	-	3666313	3666080	M. shigaense_denovo_1077	1688	-	3665354	3667041
M. shigaense_orf05106	501	-	3666872	3666372	M. shigaense_denovo_1077	1688	-	3665354	3667041
M. shigaense_orf05110	984	+	3669302	3670285	M. shigaense_denovo_6032	1240	+	3669274	3670513
M. shigaense_orf05113	678	-	3671008	3670331	M. shigaense_denovo_6030	1359	-	3669802	3671160
M. shigaense_orf05125	1752	-	3686373	3684622	M. shigaense_denovo_2170	4103	-	3684275	3688377
M. shigaense_orf05126	1476	-	3687845	3686370	M. shigaense_denovo_2170	4103	-	3684275	3688377
M. shigaense_orf05149	276	-	3705256	3704981	M. shigaense_denovo_4054	590	-	3704699	3705288
M. shigaense_orf05158	813	-	3721506	3720694	M. shigaense_denovo_3056	1728	-	3720574	3722301
M. shigaense_orf05159	474	-	3721979	3721506	M. shigaense_denovo_3056	1728	-	3720574	3722301
M. shigaense_orf05162	1992	-	3725130	3723139	M. shigaense_denovo_3054	4517	-	3722711	3727227
M. shigaense_orf05164	1587	-	3726722	3725136	M. shigaense_denovo_3054	4517	-	3722711	3727227
M. shigaense_orf05173	1569	-	3732225	3730657	M. shigaense_denovo_3051	3099	-	3729162	3732260
M. shigaense_orf05175	234	-	3733368	3733135	M. shigaense_denovo_3050	959	-	3732761	3733719
M. shigaense_orf05187	228	-	3741261	3741034	M. shigaense_denovo_8065	339	-	3740957	3741295
M. shigaense_orf05189	450	+	3741827	3742276	M. shigaense_denovo_7847	554	+	3741770	3742323
M. shigaense_orf05201	798	-	3746928	3746131	M. shigaense_denovo_5473	2072	-	3745531	3747602
M. shigaense_orf05202	657	-	3747581	3746925	M. shigaense_denovo_5473	2072	-	3745531	3747602
M. shigaense_orf05207	1326	-	3752452	3751127	M. shigaense_denovo_5468	11816	-	3750631	3762446
M. shigaense_orf05208	399	-	3752874	3752476	M. shigaense_denovo_5468	11816	-	3750631	3762446
M. shigaense_orf05211	9252	-	3762154	3752903	M. shigaense_denovo_5468	11816	-	3750631	3762446
M. shigaense_orf05220	426	-	3769028	3768603	M. shigaense_denovo_6125	1236	-	3768233	3769468
M. shigaense_orf05227	186	-	3773807	3773622	M. shigaense_denovo_6118	455	-	3773437	3773891
M. shigaense_orf05230	753	+	3776388	3777140	M. shigaense_denovo_5953	1803	+	3776293	3778095
M. shigaense_orf05231	708	+	3777168	3777875	M. shigaense_denovo_5953	1803	+	3776293	3778095
M. shigaense_orf05244	147	+	3789317	3789463	M. shigaense_denovo_7337	307	+	3789236	3789542
M. shigaense_orf05251	1959	+	3792732	3794690	M. shigaense_denovo_4426	4958	+	3792130	3797087
M. shigaense_orf05254	1236	-	3795947	3794712	M. shigaense_denovo_4050	4462	-	3792649	3797110
M. shigaense_orf05255	1143	-	3797101	3795959	M. shigaense_denovo_4050	4462	-	3792649	3797110
M. shigaense_orf05260	360	-	3800867	3800508	M. shigaense_denovo_4945	638	-	3800433	3801070
M. shigaense_orf05283	222	+	3816436	3816657	M. shigaense_denovo_7492	766	+	3815985	3816750
M. shigaense_orf05291	414	+	3821787	3822200	M. shigaense_denovo_7503	1240	+	3821692	3822931
M. shigaense_orf05292	285	-	3822472	3822188	M. shigaense_denovo_7845	1196	-	3821736	3822931
M. shigaense_orf05295	270	-	3822921	3822652	M. shigaense_denovo_7845	1196	-	3821736	3822931
M. shigaense_orf05302	843	-	3829835	3828993	M. shigaense_denovo_5523	1843	-	3828480	3830322
M. shigaense_orf05303	273	-	3830292	3830020	M. shigaense_denovo_5523	1843	-	3828480	3830322
M. shigaense_orf05308	792	+	3832707	3833498	M. shigaense_denovo_4640	1643	+	3832588	3834230
M. shigaense_orf05310	354	-	3834141	3833788	M. shigaense_denovo_5517	1631	-	3832599	3834229
M. shigaense_orf05322	741	-	3839270	3838530	M. shigaense_denovo_4156	1949	-	3837362	3839310
M. shigaense_orf05323	1194	+	3839376	3840569	M. shigaense_denovo_4250	4576	+	3839348	3843923
M. shigaense_orf05324	750	+	3840641	3841390	M. shigaense_denovo_4250	4576	+	3839348	3843923
M. shigaense_orf05325	1863	+	3841535	3843397	M. shigaense_denovo_4250	4576	+	3839348	3843923
M. shigaense_orf05335	339	+	3850464	3850802	M. shigaense_denovo_3277	6692	+	3850313	3857004
M. shigaense_orf05336	345	+	3850799	3851143	M. shigaense_denovo_3277	6692	+	3850313	3857004
M. shigaense_orf05339	780	-	3852599	3851820	M. shigaense_denovo_3524	3268	-	3851760	3855027
M. shigaense_orf05341	741	-	3853397	3852657	M. shigaense_denovo_3524	3268	-	3851760	3855027
M. shigaense_orf05342	648	-	3854968	3854321	M. shigaense_denovo_3524	3268	-	3851760	3855027
M. shigaense_orf05343	816	-	3854324	3853509	M. shigaense_denovo_3524	3268	-	3851760	3855027
M. shigaense_orf05345	1035	-	3856104	3855070	M. shigaense_denovo_3523	1976	-	3855029	3857004
M. shigaense_orf05346	582	-	3856685	3856104	M. shigaense_denovo_3523	1976	-	3855029	3857004
M. shigaense_orf05355	921	-	3868555	3867635	M. shigaense_denovo_3361	3326	-	3866637	3869962
M. shigaense_orf05356	1182	-	3869916	3868735	M. shigaense_denovo_3361	3326	-	3866637	3869962
M. shigaense_orf05357	456	+	3869998	3870453	M. shigaense_denovo_3322	5135	+	3866774	3871908
M. shigaense_orf05358	297	-	3870760	3870464	M. shigaense_denovo_3360	2241	-	3870008	3872248
M. shigaense_orf05359	663	-	3871446	3870784	M. shigaense_denovo_3360	2241	-	3870008	3872248
M. shigaense_orf05368	933	+	3879724	3880656	M. shigaense_denovo_4554	1702	+	3879722	3881423
M. shigaense_orf05375	1239	-	3891512	3890274	M. shigaense_denovo_44	3051	-	3888471	3891521
M. shigaense_orf05376	576	+	3891598	3892173	M. shigaense_denovo_47	10814	+	3889912	3900725
M. shigaense_orf05377	432	-	3892623	3892192	M. shigaense_denovo_42	9320	-	3891958	3901277
M. shigaense_orf05378	366	-	3893007	3892642	M. shigaense_denovo_42	9320	-	3891958	3901277
M. shigaense_orf05379	1446	-	3894483	3893038	M. shigaense_denovo_42	9320	-	3891958	3901277
M. shigaense_orf05381	912	-	3895415	3894504	M. shigaense_denovo_42	9320	-	3891958	3901277
M. shigaense_orf05384	1653	-	3897071	3895419	M. shigaense_denovo_42	9320	-	3891958	3901277
M. shigaense_orf05385	1341	-	3898471	3897131	M. shigaense_denovo_42	9320	-	3891958	3901277
M. shigaense_orf05387	513	-	3898990	3898478	M. shigaense_denovo_42	9320	-	3891958	3901277
M. shigaense_orf05388	252	-	3899248	3898997	M. shigaense_denovo_42	9320	-	3891958	3901277
M. shigaense_orf05389	759	-	3900085	3899327	M. shigaense_denovo_42	9320	-	3891958	3901277
M. shigaense_orf05390	465	-	3900542	3900078	M. shigaense_denovo_42	9320	-	3891958	3901277
M. shigaense_orf05393	654	-	3902694	3902041	M. shigaense_denovo_41	2197	-	3901337	3903533
M. shigaense_orf05398	237	-	3905013	3904777	M. shigaense_denovo_762	6337	-	3903688	3910024
M. shigaense_orf05400	1845	-	3907105	3905261	M. shigaense_denovo_762	6337	-	3903688	3910024
M. shigaense_orf05401	945	-	3908335	3907391	M. shigaense_denovo_762	6337	-	3903688	3910024
M. shigaense_orf05402	1083	-	3909420	3908338	M. shigaense_denovo_762	6337	-	3903688	3910024
M. shigaense_orf05416	501	-	3917639	3917139	M. shigaense_denovo_7596	915	-	3916850	3917764
M. shigaense_orf05418	144	+	3918414	3918557	M. shigaense_denovo_7114	1156	+	3918265	3919420
M. shigaense_orf05419	789	-	3919405	3918617	M. shigaense_denovo_7594	1169	-	3918250	3919418
M. shigaense_orf05430	498	-	3927213	3926716	M. shigaense_denovo_5173	859	-	3926405	3927263
M. shigaense_orf05435	414	+	3930528	3930941	M. shigaense_denovo_8389	1904	+	3930213	3932116
M. shigaense_orf05436	489	-	3931481	3930993	M. shigaense_denovo_5167	1532	-	3930177	3931708
M. shigaense_orf05439	117	-	3934534	3934418	M. shigaense_denovo_5161	533	-	3934373	3934905
M. shigaense_orf05445	663	-	3938199	3937537	M. shigaense_denovo_6942	1119	-	3937449	3938567
M. shigaense_orf05450	345	-	3941973	3941629	M. shigaense_denovo_6938	451	-	3941551	3942001
M. shigaense_orf05463	1152	-	3952757	3951606	M. shigaense_denovo_6919	3277	-	3949761	3953037
M. shigaense_orf05465	222	+	3953086	3953307	M. shigaense_denovo_5580	1168	+	3953066	3954233
M. shigaense_orf05466	414	+	3953422	3953835	M. shigaense_denovo_5580	1168	+	3953066	3954233
M. shigaense_orf05471	543	-	3955543	3955001	M. shigaense_denovo_4571	1549	-	3954569	3956117
M. shigaense_orf05472	552	-	3956091	3955540	M. shigaense_denovo_4571	1549	-	3954569	3956117
M. shigaense_orf05489	1032	-	3972697	3971666	M. shigaense_denovo_6777	2589	-	3970491	3973079
M. shigaense_orf05495	600	-	3976645	3976046	M. shigaense_denovo_6464	794	-	3975856	3976649
M. shigaense_orf05497	1368	+	3976704	3978071	M. shigaense_denovo_5229	1520	+	3976686	3978205
M. shigaense_orf05506	123	+	3985498	3985620	M. shigaense_denovo_2915	2668	+	3984055	3986722
M. shigaense_orf05508	915	+	3985617	3986531	M. shigaense_denovo_2915	2668	+	3984055	3986722
M. shigaense_orf05509	129	-	3986748	3986620	M. shigaense_denovo_3025	3709	-	3986367	3990075
M. shigaense_orf05510	1242	+	3986858	3988099	M. shigaense_denovo_2916	3299	+	3986801	3990099
M. shigaense_orf05511	591	+	3988096	3988686	M. shigaense_denovo_2916	3299	+	3986801	3990099
M. shigaense_orf05513	1140	-	3989806	3988667	M. shigaense_denovo_3025	3709	-	3986367	3990075
M. shigaense_orf05517	573	+	3991606	3992178	M. shigaense_denovo_2864	1771	+	3991535	3993305
M. shigaense_orf05523	675	+	3997582	3998256	M. shigaense_denovo_2869	6197	+	3995977	4002173
M. shigaense_orf05527	3702	+	3998440	4002141	M. shigaense_denovo_2869	6197	+	3995977	4002173
M. shigaense_orf05529	825	+	4002330	4003154	M. shigaense_denovo_3514	1893	+	4002288	4004180
M. shigaense_orf05530	876	-	4004033	4003158	M. shigaense_denovo_3315	4027	-	4002251	4006277
M. shigaense_orf05532	1194	-	4005246	4004053	M. shigaense_denovo_3315	4027	-	4002251	4006277
M. shigaense_orf05533	990	-	4006260	4005271	M. shigaense_denovo_3315	4027	-	4002251	4006277
M. shigaense_orf05534	1095	+	4006420	4007514	M. shigaense_denovo_3515	4180	+	4004243	4008422
M. shigaense_orf05544	528	-	4013132	4012605	M. shigaense_denovo_1028	1906	-	4011371	4013276
M. shigaense_orf05545	441	+	4013244	4013684	M. shigaense_denovo_3521	3077	+	4011344	4014420
M. shigaense_orf05547	543	+	4015036	4015578	M. shigaense_denovo_3522	2394	+	4014460	4016853
M. shigaense_orf05551	1167	+	4017241	4018407	M. shigaense_denovo_1185	4725	+	4017210	4021934
M. shigaense_orf05552	375	-	4018872	4018498	M. shigaense_denovo_1025	4514	-	4017242	4021755
M. shigaense_orf05554	1527	-	4020429	4018903	M. shigaense_denovo_1025	4514	-	4017242	4021755
M. shigaense_orf05555	387	-	4020889	4020503	M. shigaense_denovo_1025	4514	-	4017242	4021755
M. shigaense_orf05556	741	-	4021731	4020991	M. shigaense_denovo_1025	4514	-	4017242	4021755
M. shigaense_orf05560	930	+	4023361	4024290	M. shigaense_denovo_1187	4693	+	4022742	4027434
M. shigaense_orf05561	1557	+	4024374	4025930	M. shigaense_denovo_1187	4693	+	4022742	4027434
M. shigaense_orf05562	675	+	4025936	4026610	M. shigaense_denovo_1187	4693	+	4022742	4027434
M. shigaense_orf05565	1197	-	4029525	4028329	M. shigaense_denovo_1018	2026	-	4028032	4030057
M. shigaense_orf05567	168	-	4031087	4030920	M. shigaense_denovo_1016	1059	-	4030408	4031466
M. shigaense_orf05568	123	+	4031038	4031160	M. shigaense_denovo_3212	1677	+	4029731	4031407
M. shigaense_orf05570	354	-	4032195	4031842	M. shigaense_denovo_1015	2446	-	4031477	4033922
M. shigaense_orf05572	1005	-	4033247	4032243	M. shigaense_denovo_1015	2446	-	4031477	4033922
M. shigaense_orf05577	519	-	4036823	4036305	M. shigaense_denovo_1013	2454	-	4034492	4036945
M. shigaense_orf05606	609	+	4057142	4057750	M. shigaense_denovo_4833	964	+	4056900	4057863
M. shigaense_orf05609	972	-	4060021	4059050	M. shigaense_denovo_4687	3141	-	4058499	4061639
M. shigaense_orf05612	1590	+	4061750	4063339	M. shigaense_denovo_4836	2935	+	4061721	4064655
M. shigaense_orf05613	813	-	4064165	4063353	M. shigaense_denovo_4686	3097	-	4061745	4064841
M. shigaense_orf05615	318	-	4064612	4064295	M. shigaense_denovo_4686	3097	-	4061745	4064841
M. shigaense_orf05632	1077	+	4073042	4074118	M. shigaense_denovo_5582	6848	+	4073032	4079879
M. shigaense_orf05637	2997	-	4077120	4074124	M. shigaense_denovo_7233	4953	-	4072667	4077619
M. shigaense_orf05647	1278	-	4086490	4085213	M. shigaense_denovo_269	4324	-	4083077	4087400
M. shigaense_orf05652	1101	-	4090087	4088987	M. shigaense_denovo_264	1573	-	4088955	4090527
M. shigaense_orf05653	327	-	4090455	4090129	M. shigaense_denovo_264	1573	-	4088955	4090527
M. shigaense_orf05654	114	-	4090962	4090849	M. shigaense_denovo_263	4073	-	4090784	4094856
M. shigaense_orf05655	243	+	4090961	4091203	M. shigaense_denovo_1441	3925	+	4090797	4094721
M. shigaense_orf05657	2583	-	4093989	4091407	M. shigaense_denovo_263	4073	-	4090784	4094856
M. shigaense_orf05660	462	-	4094592	4094131	M. shigaense_denovo_263	4073	-	4090784	4094856
M. shigaense_orf05669	393	-	4100590	4100198	M. shigaense_denovo_256	1333	-	4099819	4101151
M. shigaense_orf05673	279	+	4101991	4102269	M. shigaense_denovo_1447	1072	+	4101823	4102894
M. shigaense_orf05676	672	+	4103694	4104365	M. shigaense_denovo_1449	1165	+	4103676	4104840
M. shigaense_orf05679	147	-	4105775	4105629	M. shigaense_denovo_251	2667	-	4105002	4107668
M. shigaense_orf05681	588	-	4106390	4105803	M. shigaense_denovo_251	2667	-	4105002	4107668
M. shigaense_orf05682	534	+	4106468	4107001	M. shigaense_denovo_5552	2607	+	4105065	4107671
M. shigaense_orf05683	192	-	4107218	4107027	M. shigaense_denovo_251	2667	-	4105002	4107668
M. shigaense_orf05686	831	+	4108276	4109106	M. shigaense_denovo_5553	2224	+	4108124	4110347
M. shigaense_orf05687	837	+	4109138	4109974	M. shigaense_denovo_5553	2224	+	4108124	4110347
M. shigaense_orf05688	366	-	4110347	4109982	M. shigaense_denovo_250	2442	-	4107930	4110371
M. shigaense_orf05690	654	-	4111768	4111115	M. shigaense_denovo_249	3913	-	4110405	4114317
M. shigaense_orf05692	2358	-	4114236	4111879	M. shigaense_denovo_249	3913	-	4110405	4114317
M. shigaense_orf05694	753	-	4115546	4114794	M. shigaense_denovo_247	1201	-	4114780	4115980
M. shigaense_orf05700	723	-	4119401	4118679	M. shigaense_denovo_241	1872	-	4118564	4120435
M. shigaense_orf05708	1149	-	4124456	4123308	M. shigaense_denovo_238	1961	-	4122541	4124501
M. shigaense_orf05709	1485	-	4126160	4124676	M. shigaense_denovo_237	1736	-	4124512	4126247
M. shigaense_orf05714	843	+	4130429	4131271	M. shigaense_denovo_4772	4999	+	4130349	4135347
M. shigaense_orf05716	642	+	4131349	4131990	M. shigaense_denovo_4772	4999	+	4130349	4135347
M. shigaense_orf05719	2289	+	4132475	4134763	M. shigaense_denovo_4772	4999	+	4130349	4135347
M. shigaense_orf05722	201	+	4136712	4136912	M. shigaense_denovo_6537	3730	+	4136698	4140427
M. shigaense_orf05723	1119	-	4138042	4136924	M. shigaense_denovo_4877	6147	-	4136689	4142835
M. shigaense_orf05726	912	-	4138934	4138023	M. shigaense_denovo_4877	6147	-	4136689	4142835
M. shigaense_orf05727	1500	-	4140430	4138931	M. shigaense_denovo_4877	6147	-	4136689	4142835
M. shigaense_orf05747	231	+	4154200	4154430	M. shigaense_denovo_7079	1492	+	4154077	4155568
M. shigaense_orf05748	288	-	4154833	4154546	M. shigaense_denovo_8146	1692	-	4153204	4154895
M. shigaense_orf05749	432	-	4155356	4154925	M. shigaense_denovo_8145	486	-	4154897	4155382
M. shigaense_orf05750	141	+	4155374	4155514	M. shigaense_denovo_7079	1492	+	4154077	4155568
M. shigaense_orf05761	843	+	4160353	4161195	M. shigaense_denovo_7896	1044	+	4160284	4161327
M. shigaense_orf05762	189	-	4161356	4161168	M. shigaense_denovo_3571	845	-	4160797	4161641
M. shigaense_orf05764	390	+	4161617	4162006	M. shigaense_denovo_7899	482	+	4161588	4162069
M. shigaense_orf05767	324	-	4163018	4162695	M. shigaense_denovo_3566	583	-	4162671	4163253
M. shigaense_orf05778	381	+	4167563	4167943	M. shigaense_denovo_2261	825	+	4167479	4168303
M. shigaense_orf05779	405	-	4168394	4167990	M. shigaense_denovo_2196	926	-	4167510	4168435
M. shigaense_orf05780	495	+	4168542	4169036	M. shigaense_denovo_2262	660	+	4168501	4169160
M. shigaense_orf05784	1131	+	4170288	4171418	M. shigaense_denovo_2265	7035	+	4170231	4177265
M. shigaense_orf05786	1035	-	4172449	4171415	M. shigaense_denovo_2193	9788	-	4169492	4179279
M. shigaense_orf05787	594	+	4172512	4173105	M. shigaense_denovo_2265	7035	+	4170231	4177265
M. shigaense_orf05788	1263	+	4173102	4174364	M. shigaense_denovo_2265	7035	+	4170231	4177265
M. shigaense_orf05789	249	+	4174354	4174602	M. shigaense_denovo_2265	7035	+	4170231	4177265
M. shigaense_orf05791	1095	+	4174664	4175758	M. shigaense_denovo_2265	7035	+	4170231	4177265
M. shigaense_orf05793	798	-	4176552	4175755	M. shigaense_denovo_2193	9788	-	4169492	4179279
M. shigaense_orf05794	672	-	4177249	4176578	M. shigaense_denovo_2193	9788	-	4169492	4179279
M. shigaense_orf05802	876	-	4183245	4182370	M. shigaense_denovo_2187	7059	-	4181816	4188874
M. shigaense_orf05804	1302	-	4184629	4183328	M. shigaense_denovo_2187	7059	-	4181816	4188874
M. shigaense_orf05806	828	-	4185684	4184857	M. shigaense_denovo_2187	7059	-	4181816	4188874
M. shigaense_orf05807	1470	-	4187268	4185799	M. shigaense_denovo_2187	7059	-	4181816	4188874
M. shigaense_orf05808	873	+	4187474	4188346	M. shigaense_denovo_2269	7140	+	4181735	4188874
M. shigaense_orf05809	417	-	4188835	4188419	M. shigaense_denovo_2187	7059	-	4181816	4188874
M. shigaense_orf05821	342	+	4196357	4196698	M. shigaense_denovo_832	5832	+	4196302	4202133
M. shigaense_orf05823	495	+	4196912	4197406	M. shigaense_denovo_832	5832	+	4196302	4202133
M. shigaense_orf05824	1167	-	4198643	4197477	M. shigaense_denovo_791	5842	-	4196288	4202129
M. shigaense_orf05825	675	-	4199363	4198689	M. shigaense_denovo_791	5842	-	4196288	4202129
M. shigaense_orf05826	1407	-	4200860	4199454	M. shigaense_denovo_791	5842	-	4196288	4202129
M. shigaense_orf05828	1068	-	4202023	4200956	M. shigaense_denovo_791	5842	-	4196288	4202129
M. shigaense_orf05829	978	+	4202253	4203230	M. shigaense_denovo_833	2549	+	4202140	4204688
M. shigaense_orf05831	1218	+	4203323	4204540	M. shigaense_denovo_833	2549	+	4202140	4204688
M. shigaense_orf05833	849	-	4205576	4204728	M. shigaense_denovo_790	3535	-	4202149	4205683
M. shigaense_orf05836	783	+	4206924	4207706	M. shigaense_denovo_838	1985	+	4206735	4208719
M. shigaense_orf05840	429	-	4209899	4209471	M. shigaense_denovo_786	5048	-	4209260	4214307
M. shigaense_orf05841	585	-	4210483	4209899	M. shigaense_denovo_786	5048	-	4209260	4214307
M. shigaense_orf05842	420	+	4210636	4211055	M. shigaense_denovo_842	1967	+	4210526	4212492
M. shigaense_orf05843	1044	+	4211147	4212190	M. shigaense_denovo_842	1967	+	4210526	4212492
M. shigaense_orf05844	870	-	4213060	4212191	M. shigaense_denovo_786	5048	-	4209260	4214307
M. shigaense_orf05845	882	-	4213943	4213062	M. shigaense_denovo_786	5048	-	4209260	4214307
M. shigaense_orf05853	273	-	4218388	4218116	M. shigaense_denovo_4576	2481	-	4217904	4220384
M. shigaense_orf05855	756	-	4219153	4218398	M. shigaense_denovo_4576	2481	-	4217904	4220384
M. shigaense_orf05856	783	-	4220040	4219258	M. shigaense_denovo_4576	2481	-	4217904	4220384
M. shigaense_orf05858	336	+	4221526	4221861	M. shigaense_denovo_4624	1364	+	4221345	4222708
M. shigaense_orf05868	762	+	4227338	4228099	M. shigaense_denovo_1130	10276	+	4227253	4237528
M. shigaense_orf05870	1521	+	4228096	4229616	M. shigaense_denovo_1130	10276	+	4227253	4237528
M. shigaense_orf05872	123	+	4229877	4229999	M. shigaense_denovo_1130	10276	+	4227253	4237528
M. shigaense_orf05874	1671	+	4230085	4231755	M. shigaense_denovo_1130	10276	+	4227253	4237528
M. shigaense_orf05876	2154	+	4231755	4233908	M. shigaense_denovo_1130	10276	+	4227253	4237528
M. shigaense_orf05878	924	+	4233910	4234833	M. shigaense_denovo_1130	10276	+	4227253	4237528
M. shigaense_orf05880	2544	+	4234858	4237401	M. shigaense_denovo_1130	10276	+	4227253	4237528
M. shigaense_orf05886	567	-	4240159	4239593	M. shigaense_denovo_2248	3123	-	4239370	4242492
M. shigaense_orf05888	1290	-	4241552	4240263	M. shigaense_denovo_2248	3123	-	4239370	4242492
M. shigaense_orf05890	777	-	4242406	4241630	M. shigaense_denovo_2248	3123	-	4239370	4242492
M. shigaense_orf05895	1341	+	4247552	4248892	M. shigaense_denovo_1134	4009	+	4247437	4251445
M. shigaense_orf05897	615	-	4249608	4248994	M. shigaense_denovo_3512	3936	-	4247513	4251448
M. shigaense_orf05898	1488	+	4249929	4251416	M. shigaense_denovo_1134	4009	+	4247437	4251445
M. shigaense_orf05901	981	+	4251526	4252506	M. shigaense_denovo_1135	2070	+	4251486	4253555
M. shigaense_orf05902	357	+	4252507	4252863	M. shigaense_denovo_1135	2070	+	4251486	4253555
M. shigaense_orf05903	645	+	4252860	4253504	M. shigaense_denovo_1135	2070	+	4251486	4253555
M. shigaense_orf05907	657	+	4254890	4255546	M. shigaense_denovo_7355	2679	+	4254576	4257254
M. shigaense_orf05908	576	+	4255559	4256134	M. shigaense_denovo_7355	2679	+	4254576	4257254
M. shigaense_orf05909	828	-	4256926	4256099	M. shigaense_denovo_5799	2167	-	4254798	4256964
M. shigaense_orf05912	1635	-	4259889	4258255	M. shigaense_denovo_4358	2800	-	4257569	4260368
M. shigaense_orf05916	954	-	4262149	4261196	M. shigaense_denovo_4356	2818	-	4261075	4263892
M. shigaense_orf05917	1059	-	4263171	4262113	M. shigaense_denovo_4356	2818	-	4261075	4263892
M. shigaense_orf05922	405	+	4265894	4266298	M. shigaense_denovo_5461	834	+	4265856	4266689
M. shigaense_orf05924	711	-	4269084	4268374	M. shigaense_denovo_4349	2860	-	4267125	4269984
M. shigaense_orf05925	678	-	4269858	4269181	M. shigaense_denovo_4349	2860	-	4267125	4269984
M. shigaense_orf05955	1464	-	4288496	4287033	M. shigaense_denovo_6848	2495	-	4286977	4289471
M. shigaense_orf05986	723	-	4309088	4308366	M. shigaense_denovo_5887	1042	-	4308196	4309237
M. shigaense_orf05992	117	-	4313169	4313053	M. shigaense_denovo_2096	378	-	4312880	4313257
M. shigaense_orf05995	1029	-	4315525	4314497	M. shigaense_denovo_2095	5064	-	4313563	4318626
M. shigaense_orf05998	654	-	4316368	4315715	M. shigaense_denovo_2095	5064	-	4313563	4318626
M. shigaense_orf06001	1293	-	4317682	4316390	M. shigaense_denovo_2095	5064	-	4313563	4318626
M. shigaense_orf06006	339	+	4319381	4319719	M. shigaense_denovo_2385	9091	+	4318727	4327817
M. shigaense_orf06007	681	+	4319785	4320465	M. shigaense_denovo_2385	9091	+	4318727	4327817
M. shigaense_orf06008	450	+	4320531	4320980	M. shigaense_denovo_2385	9091	+	4318727	4327817
M. shigaense_orf06010	486	-	4321478	4320993	M. shigaense_denovo_2094	12680	-	4318666	4331345
M. shigaense_orf06012	1143	-	4322704	4321562	M. shigaense_denovo_2094	12680	-	4318666	4331345
M. shigaense_orf06013	1530	-	4324652	4323123	M. shigaense_denovo_2094	12680	-	4318666	4331345
M. shigaense_orf06015	687	-	4325338	4324652	M. shigaense_denovo_2094	12680	-	4318666	4331345
M. shigaense_orf06016	174	-	4325678	4325505	M. shigaense_denovo_2094	12680	-	4318666	4331345
M. shigaense_orf06018	174	+	4325711	4325884	M. shigaense_denovo_2385	9091	+	4318727	4327817
M. shigaense_orf06019	1713	+	4325905	4327617	M. shigaense_denovo_2385	9091	+	4318727	4327817
M. shigaense_orf06024	1167	+	4332420	4333586	M. shigaense_denovo_2390	3695	+	4332105	4335799
M. shigaense_orf06028	828	+	4333597	4334424	M. shigaense_denovo_2390	3695	+	4332105	4335799
M. shigaense_orf06030	606	+	4334507	4335112	M. shigaense_denovo_2390	3695	+	4332105	4335799
M. shigaense_orf06031	327	+	4335213	4335539	M. shigaense_denovo_2390	3695	+	4332105	4335799
M. shigaense_orf06035	330	-	4338202	4337873	M. shigaense_denovo_2088	6022	-	4337476	4343497
M. shigaense_orf06037	1917	-	4340133	4338217	M. shigaense_denovo_2088	6022	-	4337476	4343497
M. shigaense_orf06038	1395	-	4341598	4340204	M. shigaense_denovo_2088	6022	-	4337476	4343497
M. shigaense_orf06041	1581	-	4343220	4341640	M. shigaense_denovo_2088	6022	-	4337476	4343497
M. shigaense_orf06046	948	-	4346326	4345379	M. shigaense_denovo_2084	1859	-	4344697	4346555
M. shigaense_orf06050	903	-	4349949	4349047	M. shigaense_denovo_2079	1401	-	4349035	4350435
M. shigaense_orf06057	570	+	4352515	4353084	M. shigaense_denovo_2406	3249	+	4352196	4355444
M. shigaense_orf06060	273	+	4355847	4356119	M. shigaense_denovo_2407	4336	+	4355546	4359881
M. shigaense_orf06062	1665	+	4356315	4357979	M. shigaense_denovo_2407	4336	+	4355546	4359881
M. shigaense_orf06064	582	-	4358562	4357981	M. shigaense_denovo_2073	2243	-	4357630	4359872
M. shigaense_orf06068	750	-	4361462	4360713	M. shigaense_denovo_2820	7638	-	4360118	4367755
M. shigaense_orf06069	864	-	4362431	4361568	M. shigaense_denovo_2820	7638	-	4360118	4367755
M. shigaense_orf06070	741	-	4363193	4362453	M. shigaense_denovo_2820	7638	-	4360118	4367755
M. shigaense_orf06071	906	+	4363318	4364223	M. shigaense_denovo_2410	1637	+	4363297	4364933
M. shigaense_orf06074	765	+	4365854	4366618	M. shigaense_denovo_2411	3441	+	4364982	4368422
M. shigaense_orf06075	867	+	4366715	4367581	M. shigaense_denovo_2411	3441	+	4364982	4368422
M. shigaense_orf06105	186	-	4389427	4389242	M. shigaense_denovo_5540	799	-	4388649	4389447
M. shigaense_orf06111	132	+	4391864	4391995	M. shigaense_denovo_5566	2014	+	4391685	4393698
M. shigaense_orf06112	246	-	4392287	4392042	M. shigaense_denovo_5534	1958	-	4391258	4393215
M. shigaense_orf06113	180	-	4392666	4392487	M. shigaense_denovo_5534	1958	-	4391258	4393215
M. shigaense_orf06114	135	-	4392800	4392666	M. shigaense_denovo_5534	1958	-	4391258	4393215
M. shigaense_orf06115	222	-	4393081	4392860	M. shigaense_denovo_5534	1958	-	4391258	4393215
M. shigaense_orf06116	186	+	4393300	4393485	M. shigaense_denovo_5566	2014	+	4391685	4393698
M. shigaense_orf06117	432	-	4394366	4393935	M. shigaense_denovo_758	688	-	4393759	4394446
M. shigaense_orf06118	186	-	4394728	4394543	M. shigaense_denovo_757	572	-	4394494	4395065
M. shigaense_orf06130	480	+	4401508	4401987	M. shigaense_denovo_738	711	+	4401442	4402152
M. shigaense_orf06133	189	-	4403149	4402961	M. shigaense_denovo_7806	436	-	4402862	4403297
M. shigaense_orf06144	624	+	4411766	4412389	M. shigaense_denovo_5831	2430	+	4411746	4414175
M. shigaense_orf06145	702	+	4412562	4413263	M. shigaense_denovo_5831	2430	+	4411746	4414175
M. shigaense_orf06151	228	-	4415762	4415535	M. shigaense_denovo_5241	313	-	4415508	4415820
M. shigaense_orf06157	1296	-	4419006	4417711	M. shigaense_denovo_5238	1692	-	4417534	4419225
M. shigaense_orf06162	114	+	4425969	4426082	M. shigaense_denovo_7257	612	+	4425733	4426344
M. shigaense_orf06163	231	-	4425970	4425740	M. shigaense_denovo_7778	404	-	4425676	4426079
M. shigaense_orf06166	450	+	4428073	4428522	M. shigaense_denovo_7259	1827	+	4426840	4428666
M. shigaense_orf06175	795	+	4432786	4433580	M. shigaense_denovo_2627	2446	+	4431502	4433947
M. shigaense_orf06183	456	+	4435534	4435989	M. shigaense_denovo_2631	737	+	4435266	4436002
M. shigaense_orf06184	1659	+	4437063	4438721	M. shigaense_denovo_2510	1891	+	4437055	4438945
M. shigaense_orf06190	408	-	4440739	4440332	M. shigaense_denovo_2671	1078	-	4439725	4440802
M. shigaense_orf06194	771	+	4443084	4443854	M. shigaense_denovo_2515	2734	+	4442766	4445499
M. shigaense_orf06195	426	-	4444306	4443881	M. shigaense_denovo_2669	2944	-	4442557	4445500
M. shigaense_orf06196	495	-	4444797	4444303	M. shigaense_denovo_2669	2944	-	4442557	4445500
M. shigaense_orf06198	426	-	4445210	4444785	M. shigaense_denovo_2669	2944	-	4442557	4445500
M. shigaense_orf06204	1650	+	4447961	4449610	M. shigaense_denovo_2695	1918	+	4447730	4449647
M. shigaense_orf06205	681	+	4449706	4450386	M. shigaense_denovo_2696	1432	+	4449689	4451120
M. shigaense_orf06207	207	+	4451288	4451494	M. shigaense_denovo_2697	1664	+	4451158	4452821
M. shigaense_orf06208	756	+	4452975	4453730	M. shigaense_denovo_2698	1068	+	4452924	4453991
M. shigaense_orf06210	675	+	4454578	4455252	M. shigaense_denovo_2699	1332	+	4454137	4455468
M. shigaense_orf06218	294	+	4461500	4461793	M. shigaense_denovo_1881	923	+	4461175	4462097
M. shigaense_orf06222	141	+	4464653	4464793	M. shigaense_denovo_1887	299	+	4464632	4464930
M. shigaense_orf06224	267	-	4465823	4465557	M. shigaense_denovo_1788	5876	-	4464328	4470203
M. shigaense_orf06225	405	-	4466224	4465820	M. shigaense_denovo_1788	5876	-	4464328	4470203
M. shigaense_orf06226	429	-	4466710	4466282	M. shigaense_denovo_1788	5876	-	4464328	4470203
M. shigaense_orf06228	2145	-	4468957	4466813	M. shigaense_denovo_1788	5876	-	4464328	4470203
M. shigaense_orf06229	1212	-	4470173	4468962	M. shigaense_denovo_1788	5876	-	4464328	4470203
M. shigaense_orf06232	405	-	4471923	4471519	M. shigaense_denovo_1785	667	-	4471302	4471968
M. shigaense_orf06236	1701	+	4474184	4475884	M. shigaense_denovo_1895	2654	+	4473810	4476463
M. shigaense_orf06238	642	-	4477367	4476726	M. shigaense_denovo_6114	2754	-	4476564	4479317
M. shigaense_orf06240	873	-	4478236	4477364	M. shigaense_denovo_6114	2754	-	4476564	4479317
M. shigaense_orf06250	702	-	4483663	4482962	M. shigaense_denovo_6107	1531	-	4482469	4483999
M. shigaense_orf06255	549	-	4485995	4485447	M. shigaense_denovo_6105	983	-	4485177	4486159
M. shigaense_orf06260	771	+	4489208	4489978	M. shigaense_denovo_6302	2569	+	4489066	4491634
M. shigaense_orf06261	597	+	4489975	4490571	M. shigaense_denovo_6302	2569	+	4489066	4491634
M. shigaense_orf06262	507	+	4490674	4491180	M. shigaense_denovo_6302	2569	+	4489066	4491634
M. shigaense_orf06266	1083	-	4496927	4495845	M. shigaense_denovo_6697	2597	-	4495838	4498434
M. shigaense_orf06267	1023	-	4497942	4496920	M. shigaense_denovo_6697	2597	-	4495838	4498434
M. shigaense_orf06271	1182	-	4502393	4501212	M. shigaense_denovo_6694	2847	-	4500454	4503300
M. shigaense_orf06272	129	-	4502542	4502414	M. shigaense_denovo_6694	2847	-	4500454	4503300
M. shigaense_orf06274	201	+	4503593	4503793	M. shigaense_denovo_4750	2282	+	4503216	4505497
M. shigaense_orf06277	1362	+	4503808	4505169	M. shigaense_denovo_4750	2282	+	4503216	4505497
M. shigaense_orf06293	1146	+	4513699	4514844	M. shigaense_denovo_8348	1688	+	4513297	4514984
M. shigaense_orf06307	294	-	4524417	4524124	M. shigaense_denovo_8584	1117	-	4523638	4524754
M. shigaense_orf06308	201	-	4524648	4524448	M. shigaense_denovo_8584	1117	-	4523638	4524754
M. shigaense_orf06313	417	-	4528931	4528515	M. shigaense_denovo_8230	2499	-	4527962	4530460
M. shigaense_orf06314	1182	-	4530118	4528937	M. shigaense_denovo_8230	2499	-	4527962	4530460
M. shigaense_orf06319	510	+	4531926	4532435	M. shigaense_denovo_94	839	+	4531661	4532499
M. shigaense_orf06332	651	+	4540492	4541142	M. shigaense_denovo_4647	1186	+	4540009	4541194
M. shigaense_orf06333	840	+	4541431	4542270	M. shigaense_denovo_4649	1851	+	4541362	4543212
M. shigaense_orf06334	417	-	4542690	4542274	M. shigaense_denovo_4706	2777	-	4540417	4543193
M. shigaense_orf06367	621	+	4568837	4569457	M. shigaense_denovo_8405	1623	+	4568812	4570434
M. shigaense_orf06368	918	-	4570367	4569450	M. shigaense_denovo_7830	1117	-	4569292	4570408
M. shigaense_orf06370	894	+	4571631	4572524	M. shigaense_denovo_8406	1943	+	4570620	4572562
M. shigaense_orf06372	243	+	4572625	4572867	M. shigaense_denovo_8407	278	+	4572592	4572869
M. shigaense_orf06378	312	+	4577293	4577604	M. shigaense_denovo_2360	3197	+	4577277	4580473
M. shigaense_orf06379	309	+	4577624	4577932	M. shigaense_denovo_2360	3197	+	4577277	4580473
M. shigaense_orf06380	1038	-	4578981	4577944	M. shigaense_denovo_2354	3207	-	4577558	4580764
M. shigaense_orf06381	957	-	4579934	4578978	M. shigaense_denovo_2354	3207	-	4577558	4580764
M. shigaense_orf06383	441	-	4580359	4579919	M. shigaense_denovo_2354	3207	-	4577558	4580764
M. shigaense_orf06387	150	-	4582085	4581936	M. shigaense_denovo_2351	3161	-	4581487	4584647
M. shigaense_orf06388	1521	+	4582196	4583716	M. shigaense_denovo_2364	2955	+	4581702	4584656
M. shigaense_orf06390	810	-	4584527	4583718	M. shigaense_denovo_2351	3161	-	4581487	4584647
M. shigaense_orf06403	792	+	4595607	4596398	M. shigaense_denovo_2423	3239	+	4595114	4598352
M. shigaense_orf06404	408	+	4596559	4596966	M. shigaense_denovo_2423	3239	+	4595114	4598352
M. shigaense_orf06405	279	-	4597203	4596925	M. shigaense_denovo_2650	2448	-	4595965	4598412
M. shigaense_orf06406	1059	-	4598299	4597241	M. shigaense_denovo_2650	2448	-	4595965	4598412
M. shigaense_orf06408	1023	+	4599071	4600093	M. shigaense_denovo_2424	3257	+	4598443	4601699
M. shigaense_orf06410	1134	+	4600101	4601234	M. shigaense_denovo_2424	3257	+	4598443	4601699
M. shigaense_orf06413	669	+	4603638	4604306	M. shigaense_denovo_5688	3066	+	4603291	4606356
M. shigaense_orf06414	777	-	4605096	4604320	M. shigaense_denovo_6349	2625	-	4603654	4606278
M. shigaense_orf06415	915	-	4606024	4605110	M. shigaense_denovo_6349	2625	-	4603654	4606278
M. shigaense_orf06419	219	+	4608024	4608242	M. shigaense_denovo_5692	1012	+	4607636	4608647
M. shigaense_orf06421	765	-	4610100	4609336	M. shigaense_denovo_123	1800	-	4608869	4610668
M. shigaense_orf06422	132	-	4610303	4610172	M. shigaense_denovo_123	1800	-	4608869	4610668
M. shigaense_orf06426	465	+	4611839	4612303	M. shigaense_denovo_1007	4151	+	4611269	4615419
M. shigaense_orf06427	834	+	4612338	4613171	M. shigaense_denovo_1007	4151	+	4611269	4615419
M. shigaense_orf06428	303	+	4613173	4613475	M. shigaense_denovo_1007	4151	+	4611269	4615419
M. shigaense_orf06429	609	+	4613693	4614301	M. shigaense_denovo_1007	4151	+	4611269	4615419
M. shigaense_orf06433	1551	+	4616958	4618508	M. shigaense_denovo_1636	2117	+	4616939	4619055
M. shigaense_orf06436	1098	+	4619678	4620775	M. shigaense_denovo_1638	4753	+	4619317	4624069
M. shigaense_orf06438	189	+	4620922	4621110	M. shigaense_denovo_1638	4753	+	4619317	4624069
M. shigaense_orf06439	1095	-	4622274	4621180	M. shigaense_denovo_2032	4682	-	4619333	4624014
M. shigaense_orf06440	1545	-	4623871	4622327	M. shigaense_denovo_2032	4682	-	4619333	4624014
M. shigaense_orf06447	480	+	4626638	4627117	M. shigaense_denovo_4467	5082	+	4626629	4631710
M. shigaense_orf06448	150	-	4629617	4629468	M. shigaense_denovo_2024	1505	-	4628925	4630429
M. shigaense_orf06450	144	-	4629812	4629669	M. shigaense_denovo_2024	1505	-	4628925	4630429
M. shigaense_orf06451	162	-	4630112	4629951	M. shigaense_denovo_2024	1505	-	4628925	4630429
M. shigaense_orf06452	303	-	4630418	4630116	M. shigaense_denovo_2024	1505	-	4628925	4630429
M. shigaense_orf06453	618	+	4630444	4631061	M. shigaense_denovo_4467	5082	+	4626629	4631710
M. shigaense_orf06454	336	-	4631390	4631055	M. shigaense_denovo_2023	946	-	4630445	4631390
M. shigaense_orf06457	996	+	4632792	4633787	M. shigaense_denovo_4470	2563	+	4632538	4635100
M. shigaense_orf06458	801	+	4633784	4634584	M. shigaense_denovo_4470	2563	+	4632538	4635100
M. shigaense_orf06471	471	+	4641907	4642377	M. shigaense_denovo_2158	3969	+	4641650	4645618
M. shigaense_orf06472	399	-	4642769	4642371	M. shigaense_denovo_2103	1697	-	4641569	4643265
M. shigaense_orf06474	369	+	4643461	4643829	M. shigaense_denovo_2158	3969	+	4641650	4645618
M. shigaense_orf06476	444	+	4644019	4644462	M. shigaense_denovo_2158	3969	+	4641650	4645618
M. shigaense_orf06477	675	-	4645214	4644540	M. shigaense_denovo_2102	2490	-	4643336	4645825
M. shigaense_orf06480	240	-	4645450	4645211	M. shigaense_denovo_2102	2490	-	4643336	4645825
M. shigaense_orf06482	639	+	4646226	4646864	M. shigaense_denovo_2159	2031	+	4645834	4647864
M. shigaense_orf06495	618	-	4659144	4658527	M. shigaense_denovo_5639	779	-	4658384	4659162
M. shigaense_orf06513	186	+	4670917	4671102	M. shigaense_denovo_5630	630	+	4670685	4671314
M. shigaense_orf06516	1128	+	4671816	4672943	M. shigaense_denovo_5632	1327	+	4671737	4673063
M. shigaense_orf06521	405	+	4675481	4675885	M. shigaense_denovo_5214	4361	+	4675106	4679466
M. shigaense_orf06522	1395	-	4677276	4675882	M. shigaense_denovo_5351	3039	-	4675115	4678153
M. shigaense_orf06524	720	-	4678063	4677344	M. shigaense_denovo_5351	3039	-	4675115	4678153
M. shigaense_orf06525	564	+	4678374	4678937	M. shigaense_denovo_5214	4361	+	4675106	4679466
M. shigaense_orf06533	396	-	4684103	4683708	M. shigaense_denovo_7464	1297	-	4683388	4684684
M. shigaense_orf06535	315	-	4684477	4684163	M. shigaense_denovo_7464	1297	-	4683388	4684684
M. shigaense_orf06542	1263	-	4692136	4690874	M. shigaense_denovo_3196	2292	-	4690034	4692325
M. shigaense_orf06554	561	-	4698140	4697580	M. shigaense_denovo_7110	936	-	4697244	4698179
M. shigaense_orf06561	375	+	4701086	4701460	M. shigaense_denovo_3943	978	+	4701000	4701977
M. shigaense_orf06565	1479	+	4702455	4703933	M. shigaense_denovo_3945	2490	+	4702304	4704793
M. shigaense_orf06573	120	+	4708393	4708512	M. shigaense_denovo_3952	4613	+	4708140	4712752
M. shigaense_orf06575	1482	+	4708513	4709994	M. shigaense_denovo_3952	4613	+	4708140	4712752
M. shigaense_orf06576	579	+	4710064	4710642	M. shigaense_denovo_3952	4613	+	4708140	4712752
M. shigaense_orf06577	492	-	4711140	4710649	M. shigaense_denovo_4238	4154	-	4709570	4713723
M. shigaense_orf06578	690	-	4711829	4711140	M. shigaense_denovo_4238	4154	-	4709570	4713723
M. shigaense_orf06579	1731	-	4713559	4711829	M. shigaense_denovo_4238	4154	-	4709570	4713723
M. shigaense_orf06587	843	-	4720320	4719478	M. shigaense_denovo_4229	1296	-	4719201	4720496
M. shigaense_orf06589	870	-	4722210	4721341	M. shigaense_denovo_4227	2095	-	4720911	4723005
M. shigaense_orf06590	144	-	4722434	4722291	M. shigaense_denovo_4227	2095	-	4720911	4723005
M. shigaense_orf06592	1098	+	4723881	4724978	M. shigaense_denovo_4377	2083	+	4723381	4725463
M. shigaense_orf06608	813	+	4735872	4736684	M. shigaense_denovo_8219	2782	+	4733908	4736689
M. shigaense_orf06622	1188	+	4745085	4746272	M. shigaense_denovo_2789	2747	+	4745073	4747819
M. shigaense_orf06624	447	+	4746275	4746721	M. shigaense_denovo_2789	2747	+	4745073	4747819
M. shigaense_orf06627	1128	-	4749781	4748654	M. shigaense_denovo_3973	4149	-	4748396	4752544
M. shigaense_orf06628	216	+	4749798	4750013	M. shigaense_denovo_2793	3143	+	4749476	4752618
M. shigaense_orf06630	1062	-	4751277	4750216	M. shigaense_denovo_3973	4149	-	4748396	4752544
M. shigaense_orf06631	822	-	4752095	4751274	M. shigaense_denovo_3973	4149	-	4748396	4752544
M. shigaense_orf06633	1692	+	4753095	4754786	M. shigaense_denovo_2794	2583	+	4752659	4755241
M. shigaense_orf06638	402	-	4758236	4757835	M. shigaense_denovo_3964	1929	-	4757428	4759356
M. shigaense_orf06639	963	-	4759195	4758233	M. shigaense_denovo_3964	1929	-	4757428	4759356
M. shigaense_orf06643	1065	+	4762842	4763906	M. shigaense_denovo_6495	2743	+	4761524	4764266
M. shigaense_orf06648	906	-	4767203	4766298	M. shigaense_denovo_6686	2574	-	4765426	4767999
M. shigaense_orf06649	735	-	4767952	4767218	M. shigaense_denovo_6686	2574	-	4765426	4767999
M. shigaense_orf06659	594	-	4775114	4774521	M. shigaense_denovo_8537	1643	-	4773634	4775276
M. shigaense_orf06667	936	+	4779955	4780890	M. shigaense_denovo_3609	4784	+	4779585	4784368
M. shigaense_orf06668	960	+	4780937	4781896	M. shigaense_denovo_3609	4784	+	4779585	4784368
M. shigaense_orf06670	1170	+	4781893	4783062	M. shigaense_denovo_3609	4784	+	4779585	4784368
M. shigaense_orf06675	492	-	4785473	4784982	M. shigaense_denovo_3645	2678	-	4783881	4786558
M. shigaense_orf06676	243	-	4785937	4785695	M. shigaense_denovo_3645	2678	-	4783881	4786558
M. shigaense_orf06677	138	-	4785677	4785540	M. shigaense_denovo_3645	2678	-	4783881	4786558
M. shigaense_orf06681	414	+	4789538	4789951	M. shigaense_denovo_1912	4224	+	4789327	4793550
M. shigaense_orf06682	567	-	4790542	4789976	M. shigaense_denovo_438	9878	-	4789231	4799108
M. shigaense_orf06683	888	-	4792343	4791456	M. shigaense_denovo_438	9878	-	4789231	4799108
M. shigaense_orf06684	903	-	4791459	4790557	M. shigaense_denovo_438	9878	-	4789231	4799108
M. shigaense_orf06686	1185	-	4793531	4792347	M. shigaense_denovo_438	9878	-	4789231	4799108
M. shigaense_orf06690	534	+	4794823	4795356	M. shigaense_denovo_1914	1303	+	4794407	4795709
M. shigaense_orf06692	261	-	4795600	4795340	M. shigaense_denovo_438	9878	-	4789231	4799108
M. shigaense_orf06693	2154	-	4797837	4795684	M. shigaense_denovo_438	9878	-	4789231	4799108
M. shigaense_orf06694	660	+	4798049	4798708	M. shigaense_denovo_1916	1380	+	4797926	4799305
M. shigaense_orf06697	132	-	4799970	4799839	M. shigaense_denovo_434	2213	-	4799543	4801755
M. shigaense_orf06698	930	+	4799927	4800856	M. shigaense_denovo_1917	2138	+	4799308	4801445
M. shigaense_orf06700	861	+	4801667	4802527	M. shigaense_denovo_1918	2032	+	4801449	4803480
M. shigaense_orf06702	759	+	4802544	4803302	M. shigaense_denovo_1918	2032	+	4801449	4803480
M. shigaense_orf06707	1392	+	4808306	4809697	M. shigaense_denovo_361	8983	+	4808273	4817255
M. shigaense_orf06709	930	-	4811536	4810607	M. shigaense_denovo_424	7126	-	4809504	4816629
M. shigaense_orf06711	1410	-	4812945	4811536	M. shigaense_denovo_424	7126	-	4809504	4816629
M. shigaense_orf06712	480	-	4813474	4812995	M. shigaense_denovo_424	7126	-	4809504	4816629
M. shigaense_orf06713	669	-	4814139	4813471	M. shigaense_denovo_424	7126	-	4809504	4816629
M. shigaense_orf06715	489	-	4814650	4814162	M. shigaense_denovo_424	7126	-	4809504	4816629
M. shigaense_orf06717	555	+	4814977	4815531	M. shigaense_denovo_361	8983	+	4808273	4817255
M. shigaense_orf06718	1416	+	4815585	4817000	M. shigaense_denovo_361	8983	+	4808273	4817255
M. shigaense_orf06721	825	-	4818912	4818088	M. shigaense_denovo_421	2069	-	4817521	4819589
M. shigaense_orf06725	309	+	4821340	4821648	M. shigaense_denovo_367	3521	+	4821327	4824847
M. shigaense_orf06728	1290	+	4821692	4822981	M. shigaense_denovo_367	3521	+	4821327	4824847
M. shigaense_orf06730	552	-	4823536	4822985	M. shigaense_denovo_702	8858	-	4821060	4829917
M. shigaense_orf06731	792	-	4824324	4823533	M. shigaense_denovo_702	8858	-	4821060	4829917
M. shigaense_orf06732	222	-	4824556	4824335	M. shigaense_denovo_702	8858	-	4821060	4829917
M. shigaense_orf06735	156	-	4824839	4824684	M. shigaense_denovo_702	8858	-	4821060	4829917
M. shigaense_orf06737	2532	-	4827560	4825029	M. shigaense_denovo_702	8858	-	4821060	4829917
M. shigaense_orf06738	120	+	4827645	4827764	M. shigaense_denovo_368	3654	+	4824953	4828606
M. shigaense_orf06739	339	-	4828227	4827889	M. shigaense_denovo_702	8858	-	4821060	4829917
M. shigaense_orf06740	1509	-	4829857	4828349	M. shigaense_denovo_702	8858	-	4821060	4829917
M. shigaense_orf06745	912	-	4832992	4832081	M. shigaense_denovo_698	962	-	4832079	4833040
M. shigaense_orf06753	399	-	4836142	4835744	M. shigaense_denovo_695	5138	-	4835408	4840545
M. shigaense_orf06754	819	-	4836953	4836135	M. shigaense_denovo_695	5138	-	4835408	4840545
M. shigaense_orf06756	609	-	4837582	4836974	M. shigaense_denovo_695	5138	-	4835408	4840545
M. shigaense_orf06759	2382	-	4839979	4837598	M. shigaense_denovo_695	5138	-	4835408	4840545
M. shigaense_orf06764	1011	+	4842808	4843818	M. shigaense_denovo_378	2259	+	4841922	4844180
M. shigaense_orf06781	489	+	4850928	4851416	M. shigaense_denovo_5313	2201	+	4850884	4853084
M. shigaense_orf06783	681	+	4851476	4852156	M. shigaense_denovo_5313	2201	+	4850884	4853084
M. shigaense_orf06793	789	-	4859214	4858426	M. shigaense_denovo_308	8250	-	4858295	4866544
M. shigaense_orf06795	1239	-	4860585	4859347	M. shigaense_denovo_308	8250	-	4858295	4866544
M. shigaense_orf06796	1722	+	4860628	4862349	M. shigaense_denovo_464	7254	+	4859296	4866549
M. shigaense_orf06798	2784	-	4865145	4862362	M. shigaense_denovo_308	8250	-	4858295	4866544
M. shigaense_orf06799	615	-	4866022	4865408	M. shigaense_denovo_308	8250	-	4858295	4866544
M. shigaense_orf06800	204	-	4866376	4866173	M. shigaense_denovo_308	8250	-	4858295	4866544
M. shigaense_orf06812	267	+	4874780	4875046	M. shigaense_denovo_23	3133	+	4874269	4877401
M. shigaense_orf06813	846	+	4875212	4876057	M. shigaense_denovo_23	3133	+	4874269	4877401
M. shigaense_orf06823	348	-	4883610	4883263	M. shigaense_denovo_3	1155	-	4883099	4884253
M. shigaense_orf06826	684	-	4886609	4885926	M. shigaense_denovo_4345	2180	-	4885317	4887496
M. shigaense_orf06835	798	-	4891797	4891000	M. shigaense_denovo_4341	5137	-	4890766	4895902
M. shigaense_orf06837	345	+	4891908	4892252	M. shigaense_denovo_4062	5394	+	4890797	4896190
M. shigaense_orf06838	675	+	4892350	4893024	M. shigaense_denovo_4062	5394	+	4890797	4896190
M. shigaense_orf06840	792	-	4893835	4893044	M. shigaense_denovo_4341	5137	-	4890766	4895902
M. shigaense_orf06842	456	-	4894296	4893841	M. shigaense_denovo_4341	5137	-	4890766	4895902
M. shigaense_orf06843	162	-	4894470	4894309	M. shigaense_denovo_4341	5137	-	4890766	4895902
M. shigaense_orf06844	1020	+	4894527	4895546	M. shigaense_denovo_4062	5394	+	4890797	4896190
M. shigaense_orf06848	285	-	4897305	4897021	M. shigaense_denovo_4340	1294	-	4896258	4897551
M. shigaense_orf06851	960	+	4900225	4901184	M. shigaense_denovo_4064	5322	+	4897774	4903095
M. shigaense_orf06852	1107	+	4901181	4902287	M. shigaense_denovo_4064	5322	+	4897774	4903095
M. shigaense_orf06860	504	-	4906858	4906355	M. shigaense_denovo_5067	1197	-	4906172	4907368
M. shigaense_orf06861	339	-	4907240	4906902	M. shigaense_denovo_5067	1197	-	4906172	4907368
M. shigaense_orf06869	210	-	4913264	4913055	M. shigaense_denovo_5053	567	-	4912995	4913561
M. shigaense_orf06879	978	+	4919330	4920307	M. shigaense_denovo_6983	1135	+	4919298	4920432
M. shigaense_orf06886	390	-	4923986	4923597	M. shigaense_denovo_4980	883	-	4923424	4924306
M. shigaense_orf06895	1311	-	4932237	4930927	M. shigaense_denovo_4174	6040	-	4930847	4936886
M. shigaense_orf06896	1290	-	4933523	4932234	M. shigaense_denovo_4174	6040	-	4930847	4936886
M. shigaense_orf06898	648	-	4934343	4933696	M. shigaense_denovo_4174	6040	-	4930847	4936886
M. shigaense_orf06899	432	-	4934795	4934364	M. shigaense_denovo_4174	6040	-	4930847	4936886
M. shigaense_orf06900	1452	-	4936293	4934842	M. shigaense_denovo_4174	6040	-	4930847	4936886
M. shigaense_orf06903	411	-	4936867	4936457	M. shigaense_denovo_4174	6040	-	4930847	4936886
M. shigaense_orf06908	1002	-	4940554	4939553	M. shigaense_denovo_6567	2518	-	4939412	4941929
M. shigaense_orf06918	1161	+	4948465	4949625	M. shigaense_denovo_6201	1535	+	4948400	4949934
M. shigaense_orf06923	612	-	4951729	4951118	M. shigaense_denovo_6175	1285	-	4950847	4952131
M. shigaense_orf06926	333	-	4952071	4951739	M. shigaense_denovo_6175	1285	-	4950847	4952131
M. shigaense_orf06927	762	+	4952200	4952961	M. shigaense_denovo_6206	1326	+	4952200	4953525
M. shigaense_orf06928	438	-	4953479	4953042	M. shigaense_denovo_6174	1321	-	4952205	4953525
M. shigaense_orf06929	1347	+	4953608	4954954	M. shigaense_denovo_6207	2610	+	4953568	4956177
M. shigaense_orf06933	1296	-	4960754	4959459	M. shigaense_denovo_5101	5823	-	4959293	4965115
M. shigaense_orf06936	828	+	4961178	4962005	M. shigaense_denovo_5112	6290	+	4958511	4964800
M. shigaense_orf06937	741	-	4962769	4962029	M. shigaense_denovo_5101	5823	-	4959293	4965115
M. shigaense_orf06939	744	-	4963756	4963013	M. shigaense_denovo_5101	5823	-	4959293	4965115
M. shigaense_orf06943	483	+	4966484	4966966	M. shigaense_denovo_5114	3326	+	4965624	4968949
M. shigaense_orf06945	486	+	4967105	4967590	M. shigaense_denovo_5114	3326	+	4965624	4968949
M. shigaense_orf06957	171	-	4976045	4975875	M. shigaense_denovo_7679	1017	-	4975673	4976689
M. shigaense_orf06958	174	+	4976154	4976327	M. shigaense_denovo_6877	586	+	4976141	4976726
M. shigaense_orf06970	822	+	4982792	4983613	M. shigaense_denovo_4950	2031	+	4982764	4984794
M. shigaense_orf06972	717	-	4984440	4983724	M. shigaense_denovo_4745	1100	-	4983679	4984778
M. shigaense_orf06979	828	+	4987776	4988603	M. shigaense_denovo_4954	2544	+	4987498	4990041
M. shigaense_orf06980	1260	-	4989859	4988600	M. shigaense_denovo_4738	2564	-	4987359	4989922
M. shigaense_orf06998	441	+	4999811	5000251	M. shigaense_denovo_7792	1433	+	4998885	5000317
M. shigaense_orf07010	387	-	5007816	5007430	M. shigaense_denovo_4034	5056	-	5006704	5011759
M. shigaense_orf07011	516	+	5007911	5008426	M. shigaense_denovo_4204	3330	+	5007667	5010996
[truncated: 88 more rows]
