# Supplementary material
Source: publisher figshare collection journal article supplement (https://tandf.figshare.com/articles/dataset/_/7936865)
Supplement: Supplementary file 1 [file 1 › temi_a_12040023_sm0019.xlsx]

## Sheet: Sheet1
Supplementary Table S12. Transcript informations of of M. triplex
Gene name	GeneBank id	Single_copy	M. shigaense_M. triplex_specific	RPKM	Description
BN973_01125	CDO86778.1	0	0	130	TetR family transcriptional regulator
BN973_01124	CDO86777.1	0	0	144	dehydrogenase/reductase
BN973_01127	CDO86780.1	0	0	155	pyridoxamine 5'-phosphate oxidase
BN973_01126	CDO86779.1	1	0	993	molecular chaperone GroEL
BN973_01121	CDO86774.1	0	0	110	transcriptional regulator
BN973_01120	CDO86773.1	0	0	177	putative hydrolase, CocE/NonD family
BN973_01123	CDO86776.1	0	1	207	aminopeptidase
BN973_01122	CDO86775.1	0	0	158	cupin domain-containing protein
BN973_01129	CDO86782.1	0	0	103	short-chain dehydrogenase/reductase SDR
BN973_01128	CDO86781.1	0	0	133	hypothetical protein
BN973_01439	CDO87088.1	0	0	158	acyltransferase
BN973_01438	CDO87087.1	0	0	186	acyltransferase
BN973_00528	CDO86187.1	0	0	163	hypothetical protein
BN973_00529	CDO86188.1	0	0	209	oxidoreductase, SDR family
BN973_00522	CDO86181.1	0	0	189	Patatin-like phospholipase
BN973_00523	CDO86182.1	0	0	164	hypothetical protein
BN973_00520	CDO86179.1	0	0	191	DNA internalization-related competence protein ComEC/Rec2
BN973_00521	CDO86180.1	0	0	137	peptidase S8/S53 subtilisin kexin sedolisin
BN973_00526	CDO86185.1	0	0	126	hydrolase
BN973_00527	CDO86186.1	0	0	138	transglutaminase
BN973_00524	CDO86183.1	0	0	180	putative calcium/sodium:proton antiporter
BN973_00525	CDO86184.1	0	0	133	endoglucanase A
BN973_04069	CDO89689.1	0	0	100	DegV family protein
BN973_04068	CDO89688.1	0	0	180	mmpL4 protein
BN973_04063	CDO89683.1	0	0	126	mmpL10 protein
BN973_04062	CDO89682.1	0	0	157	condensation domain-containing protein
BN973_04061	CDO89681.1	0	0	120	beta-ketoacyl synthase
BN973_04060	CDO89680.1	0	0	142	pimeloyl-CoA dehydrogenase
BN973_04067	CDO89687.1	0	0	128	membrane protein MmpS5
BN973_04066	CDO89686.1	0	0	130	hypothetical protein
BN973_04065	CDO89685.1	0	0	135	acyl-CoA synthetase
BN973_04064	CDO89684.1	0	0	166	PE-PPE domain-containing protein
BN973_02968	CDO88599.1	0	0	87	hypothetical protein
BN973_02969	CDO88600.1	0	0	91	heme oxygenase
BN973_02964	CDO88595.1	0	0	184	hypothetical proline rich protein
BN973_02965	CDO88596.1	0	0	144	biotin carboxylase-like protein
BN973_02966	CDO88597.1	0	0	142	hydrolase
BN973_02967	CDO88598.1	0	0	152	hypothetical protein
BN973_02960	CDO88591.1	0	0	189	hypothetical protein
BN973_02961	CDO88592.1	0	0	196	hypothetical protein
BN973_02962	CDO88593.1	0	0	171	hypothetical protein
BN973_02963	CDO88594.1	0	0	110	P450 heme-thiolate protein
BN973_03383	CDO89012.1	0	0	222	hypothetical protein
BN973_03382	CDO89011.1	0	0	147	hypothetical protein
BN973_03381	CDO89010.1	0	0	122	glucose-methanol-choline oxidoreductase
BN973_03380	CDO89009.1	0	0	122	reductase
BN973_03387	CDO89016.1	0	0	154	LysR family transcriptional regulator
BN973_03386	CDO89015.1	0	0	101	carboxymuconolactone decarboxylase
BN973_03385	CDO89014.1	0	0	118	cobalamin synthesis protein, P47K
BN973_03384	CDO89013.1	0	0	211	hypothetical protein
BN973_03389	CDO89018.1	0	0	144	cupin 2 domain-containing protein
BN973_03388	CDO89017.1	0	0	118	ECF subfamily RNA polymerase sigma-24 factor
BN973_02388	CDO88029.1	0	0	171	long-chain specific acyl-CoA dehydrogenase
BN973_02389	CDO88030.1	0	0	188	putative transmembrane alanine and glycine rich protein
BN973_02380	CDO88021.1	0	0	156	(dimethylallyl)adenosine tRNA methylthiotransferase
BN973_02381	CDO88022.1	0	0	137	transmembrane protein
BN973_02382	CDO88023.1	0	0	148	hypothetical alanine and arginine rich protein
BN973_02383	CDO88024.1	0	0	222	dehydrogenase
BN973_02384	CDO88025.1	0	0	119	hypothetical alanine rich protein
BN973_02385	CDO88026.1	1	0	110	tRNA delta(2)-isopentenylpyrophosphate transferase
BN973_02386	CDO88027.1	0	0	109	diaminopimelate epimerase
BN973_02387	CDO88028.1	1	0	173	GTPase
BN973_02032	CDO87676.1	0	1	155	MspA protein
BN973_02033	CDO87677.1	0	0	140	cell entry (mce) related family protein
BN973_02030	CDO87674.1	0	0	137	phosphotransferase enzyme family protein
BN973_02031	CDO87675.1	0	0	212	hypothetical protein
BN973_02036	CDO87680.1	0	0	73	enoyl-CoA hydratase/isomerase
BN973_02037	CDO87681.1	0	0	103	beta-ketoadipyl CoA thiolase
BN973_02034	CDO87678.1	0	0	111	acyl-CoA dehydrogenase domain-containing protein
BN973_02035	CDO87679.1	0	0	109	alpha-methylacyl-CoA racemase
BN973_02038	CDO87682.1	0	0	147	AraC family transcriptional regulator
BN973_02039	CDO87683.1	0	0	83	pigment production hydroxylase
BN973_02432	CDO88073.1	0	0	137	hypothetical protein
BN973_02433	CDO88074.1	0	0	171	methionine-R-sulfoxide reductase
BN973_01608	CDO87256.1	0	0	118	hypothetical protein
BN973_01609	CDO87257.1	0	0	148	aminotransferase
BN973_01604	CDO87252.1	0	0	108	hypothetical protein
BN973_01605	CDO87253.1	0	0	119	hypothetical protein
BN973_01606	CDO87254.1	0	0	141	transporter
BN973_01607	CDO87255.1	0	0	156	D-alanyl-D-alanine carboxypeptidase
BN973_01600	CDO87248.1	0	0	200	sugar-transport integral membrane protein SugI
BN973_01601	CDO87249.1	0	0	138	putative integral membrane protein
BN973_01602	CDO87250.1	0	0	179	transporter
BN973_01603	CDO87251.1	0	0	181	MmpS-family membrane protein
BN973_04562	CDO90169.1	0	0	207	TetR family transcriptional regulator
BN973_04563	CDO90170.1	0	0	89	putative HTH-type transcriptional regulator MarR
BN973_03064	CDO88695.1	0	0	102	TetR family transcriptional regulator
BN973_03065	CDO88696.1	0	0	164	hypothetical protein
BN973_03062	CDO88693.1	0	0	145	short chain dehydrogenase
BN973_03063	CDO88694.1	0	0	100	cytochrome P450-SU2
BN973_03060	CDO88691.1	0	0	180	amidohydrolase 2
BN973_03061	CDO88692.1	0	0	123	fatty-acid-CoA ligase FadD
BN973_05561	CDO91155.1	0	0	184	putative integral membrane protein
BN973_05560	CDO91154.1	0	0	131	hypothetical protein
BN973_05563	CDO91157.1	0	0	136	hypothetical protein
BN973_05562	CDO91156.1	0	0	116	glycosyl transferase family protein
BN973_03613	CDO89240.1	0	0	351	putative transposase
BN973_05564	CDO91158.1	0	0	151	UDP-glucose 4-epimerase GalE1
BN973_05567	NA	0	0	156	tRNA-Thr
BN973_05566	CDO91160.1	0	0	201	hypothetical protein
BN973_04218	CDO89832.1	0	1	115	alpha/beta hydrolase
BN973_04219	CDO89833.1	0	0	136	putative TIM-barrel fold metal-dependent hydrolase
BN973_00953	CDO86609.1	0	1	171	glycosyl hydrolase family protein 16
BN973_00952	CDO86608.1	0	0	154	beta-1,3-glucanase precursor
BN973_00951	CDO86607.1	0	0	69	transcriptional regulatory protein
BN973_00950	CDO86606.1	0	0	120	hypothetical protein
BN973_00957	CDO86613.1	0	0	160	amidohydrolase
BN973_00956	CDO86612.1	0	0	116	hypothetical protein
BN973_00955	CDO86611.1	0	0	99	hypothetical protein
BN973_00954	CDO86610.1	0	1	132	transmembrane protein
BN973_05129	CDO90730.1	0	0	148	molybdenum cofactor biosynthesis protein A
BN973_05128	CDO90729.1	0	0	131	integral membrane protein
BN973_00959	CDO86615.1	0	0	138	hypothetical protein
BN973_00958	CDO86614.1	0	0	138	putative integral membrane protein
BN973_01435	CDO87084.1	0	0	97	hypothetical protein
BN973_03246	CDO88876.1	0	0	88	hypothetical protein
BN973_01434	CDO87083.1	0	0	132	metallophosphoesterase
BN973_04211	CDO89825.1	0	0	135	hypothetical protein
BN973_01433	CDO87082.1	0	0	241	copper binding proteins, plastocyanin/azurin family protein
BN973_03244	CDO88874.1	0	0	136	aao
BN973_01432	CDO87081.1	0	1	187	rieske (2Fe-2S) domain-containing protein
BN973_04213	CDO89827.1	0	0	135	amidohydrolase
BN973_01431	CDO87080.1	0	1	139	RNA polymerase sigma factor, sigma-70 family protein
BN973_04214	CDO89828.1	0	0	152	anti-anti-sigma factor
BN973_01430	CDO87079.1	0	0	127	hypothetical protein
BN973_04215	CDO89829.1	0	0	146	anti-anti-sigma factor
BN973_04216	CDO89830.1	0	0	150	acyl-CoA dehydrogenase middle domain-containing protein
BN973_03537	CDO89165.1	0	0	155	putative flavoprotein involved in K+ transport
BN973_05385	CDO90980.1	0	0	167	hypothetical protein
BN973_05384	CDO90979.1	0	0	112	ferredoxin
BN973_05387	CDO90982.1	0	0	120	NADPH dependent 2,4-dienoyl-CoA reductase FadH
BN973_05386	CDO90981.1	0	0	180	alcohol dehydrogenase B
BN973_05381	CDO90976.1	0	0	138	cytochrome P450
BN973_05380	CDO90975.1	0	0	135	TetR family transcriptional regulator
BN973_05383	CDO90978.1	0	0	131	cytochrome P450 51
BN973_05382	CDO90977.1	0	0	129	short chain dehydrogenase
BN973_05389	CDO90984.1	1	0	369	HIT domain-containing protein
BN973_05388	CDO90983.1	0	0	175	steroid delta-isomerase
BN973_03606	CDO89234.1	0	0	210	hypothetical protein
BN973_03971	CDO89591.1	0	0	180	EsaT-6 like protein EsxN
BN973_03604	CDO89232.1	0	0	189	hypothetical protein
BN973_03973	CDO89593.1	0	0	275	EsaT-6 like protein EsxN
BN973_03602	CDO89230.1	1	0	152	putative phosphomutase, family
BN973_03603	CDO89231.1	0	0	173	UDP pyrophosphate phosphatase
BN973_03600	CDO89228.1	0	0	181	phosphatidylinositol 3-and 4-kinase catalytic subunit
BN973_03601	CDO89229.1	1	0	163	hypothetical protein
BN973_04658	CDO90265.1	0	0	117	cytochrome P450
BN973_03979	CDO89599.1	1	0	115	FurB protein
BN973_03608	CDO89236.1	0	0	95	putative dienelactone hydrolase
BN973_03609	CDO89237.1	1	0	83	PBP family phospholipid-binding protein
BN973_02555	CDO88191.1	0	0	152	dihydrodipicolinate synthetase family protein
BN973_02554	CDO88190.1	0	0	137	class II aldolase/adducin domain protein
BN973_02557	CDO88193.1	0	0	141	polyketide cyclase / dehydrase and lipid transport
BN973_02556	CDO88192.1	0	0	124	metallopeptidase, zinc binding
BN973_02551	CDO88187.1	0	1	282	hypothetical protein
BN973_02550	CDO88186.1	0	0	110	metallophosphoesterase
BN973_02553	CDO88189.1	0	0	132	transcriptional regulator
BN973_02552	CDO88188.1	0	0	106	AIG2-like family protein
BN973_02559	CDO88195.1	1	0	128	aspartyl-tRNA synthetase
BN973_02558	CDO88194.1	0	0	101	2-dehydropantoate 2-reductase
BN973_00777	CDO86434.1	0	0	138	short chain dehydrogenase
BN973_00776	CDO86433.1	0	0	138	hypothetical protein
BN973_00775	CDO86432.1	0	0	86	HpcH/HpaI aldolase/citrate lyase
BN973_00774	CDO86431.1	0	0	146	dehydrogenase
BN973_00773	CDO86430.1	0	0	141	cytochrome P450 superfamily protein
BN973_00772	CDO86429.1	0	0	280	hypothetical protein
BN973_00771	CDO86428.1	0	0	239	hypothetical protein
BN973_00770	CDO86427.1	0	0	116	caib/baif family protein
BN973_03116	CDO88747.1	0	0	182	hypothetical protein
BN973_00779	CDO86436.1	0	0	142	alpha/beta hydrolase
BN973_00778	CDO86435.1	0	0	134	lipolytic enzyme
BN973_04388	CDO89997.1	0	0	146	phosphoglycerate mutase family protein
BN973_04389	CDO89998.1	0	0	106	LprC protein
BN973_04382	CDO89991.1	0	0	137	oligopeptide-transport ATP-binding protein ABC transporter OppD
BN973_04383	CDO89992.1	0	0	121	peptide ABC transporter substrate-binding protein
BN973_04380	CDO89989.1	0	0	102	binding-protein-dependent transport systems inner membrane component
BN973_04381	CDO89990.1	0	0	143	ABC transporter permease
BN973_04386	CDO89995.1	1	0	120	DNA repair exonuclease SbcD
BN973_04387	CDO89996.1	0	0	204	REPhypothetical protein
BN973_04384	CDO89993.1	0	0	134	hydrolase
BN973_04385	CDO89994.1	0	0	105	hydrolase
BN973_04474	CDO90083.1	0	0	135	acyl dehydratase
BN973_04475	CDO90084.1	0	0	151	hypothetical protein
BN973_04476	CDO90085.1	0	0	121	lipid-transfer protein
BN973_04477	CDO90086.1	0	0	143	TetR family transcriptional regulator
BN973_04470	CDO90079.1	0	1	122	acyl-CoA dehydrogenase
BN973_04471	CDO90080.1	0	0	151	nucleic-acid-binding protein containing a Zn-ribbon
BN973_04472	CDO90081.1	0	0	115	putative nucleic-acid-binding protein containing a Zn-ribbon
BN973_04473	CDO90082.1	0	0	140	acyl-CoA dehydrogenase domain-containing protein
BN973_03117	CDO88748.1	0	0	159	secretion protein Snm4
BN973_04478	CDO90087.1	0	0	123	proline dehydrogenase
BN973_04479	CDO90088.1	0	0	139	1-pyrroline-5-carboxylate dehydrogenase
BN973_00153	CDO85820.1	0	0	111	putative Actinobacterial protein
BN973_03115	CDO88746.1	0	0	265	EsaT-6 like protein EsxN
BN973_03112	CDO88743.1	0	0	162	PPE family protein
BN973_02739	CDO88375.1	0	0	179	bifunctional 3-demethylubiquinone-9 3-methyltransferase/ 2-octaprenyl-6-hydroxy phenol methylase
BN973_02738	CDO88374.1	0	0	111	EpiA
BN973_02731	CDO88367.1	0	0	100	D-isomer specific 2-hydroxyacid dehydrogenase
BN973_02730	CDO88366.1	0	0	115	acylneuraminate cytidylyltransferase
BN973_02733	CDO88369.1	0	0	184	acetyltransferase
BN973_02732	CDO88368.1	0	0	91	short-chain dehydrogenase/reductase SDR
BN973_02735	CDO88371.1	0	0	112	FkbM family methyltransferase
BN973_02734	CDO88370.1	0	0	222	hypothetical protein
BN973_02737	CDO88373.1	0	0	150	GmdA
BN973_02736	CDO88372.1	0	0	160	methyltransferase FkbM
BN973_01419	CDO87068.1	1	0	120	methionine aminopeptidase
BN973_01418	CDO87067.1	1	0	199	adenylate kinase
BN973_01149	CDO86802.1	0	0	205	hypothetical protein
BN973_01148	CDO86801.1	0	0	154	enoyl-CoA hydratase
BN973_01411	CDO87060.1	0	0	150	2-hydroxyacid dehydrogenase
BN973_01410	CDO87059.1	0	0	163	L-fuculose-phosphate aldolase
BN973_01145	CDO86798.1	0	0	141	MmpL family transport protein
BN973_01144	CDO86797.1	0	0	159	MmpS5 protein
BN973_01143	CDO86796.1	0	0	148	transcriptional regulator
BN973_01142	CDO86795.1	0	1	144	DipZ protein
BN973_01141	CDO86794.1	0	0	146	oxidoreductase
BN973_01140	CDO86793.1	0	0	65	hypothetical protein
BN973_05248	CDO90848.1	0	0	162	short chain dehydrogenase/reductase SDR
BN973_05249	CDO90849.1	0	0	153	hypothetical protein
BN973_00548	CDO86207.1	0	0	131	sulfonate binding protein
BN973_00549	CDO86208.1	0	0	150	aliphatic sulfonates ABC transporter permease
BN973_05240	CDO90840.1	0	0	123	caib/baif family protein
BN973_05241	CDO90841.1	0	0	193	enoyl-CoA hydratase, EchA4
BN973_00546	CDO86205.1	0	0	166	transporter, major facilitator family protein
BN973_05243	CDO90843.1	0	0	130	peptidase, M24 family protein
BN973_05244	CDO90844.1	0	0	183	amidohydrolase
BN973_05245	CDO90845.1	0	0	164	cytochrome P450 105Q4 Cyp105Q4
BN973_05246	CDO90846.1	0	0	94	ferredoxin
BN973_05247	CDO90847.1	0	0	142	TetR family transcriptional regulator
BN973_03013	CDO88644.1	0	0	218	isoprenylcysteine carboxyl methyltransferase
BN973_03012	CDO88643.1	0	0	138	anaerobic dehydrogenase
BN973_03011	CDO88642.1	0	0	103	pyridoxamine 5'-phosphate oxidase-like protein
BN973_03010	CDO88641.1	0	0	214	hypothetical protein
BN973_03017	CDO88648.1	0	0	150	hypothetical protein
BN973_03016	CDO88647.1	0	0	155	ABC transporter ATP-binding protein
BN973_03015	CDO88646.1	0	0	95	alpha/beta hydrolase
BN973_03014	CDO88645.1	0	0	208	short chain dehydrogenase
BN973_04045	CDO89665.1	0	0	134	lipopolysaccharide heptosyltransferase I
BN973_04044	CDO89664.1	0	0	143	ribonuclease Z
BN973_04047	CDO89667.1	0	0	232	hypothetical protein
BN973_03018	CDO88649.1	0	0	140	hypothetical protein
BN973_04041	CDO89661.1	1	0	152	GTP-binding protein LepA
BN973_04040	CDO89660.1	0	0	162	glycoside hydrolase
BN973_04043	CDO89663.1	0	0	149	CBS domain-containing protein
BN973_04042	CDO89662.1	0	0	139	PemK-like protein
BN973_05322	CDO90917.1	1	0	168	phosphoribosylaminoimidazole synthetase
BN973_02946	CDO88577.1	0	0	167	short-chain dehydrogenase
BN973_02947	CDO88578.1	0	0	90	dehydratase
BN973_02944	CDO88575.1	0	0	88	dehydratase
BN973_02945	CDO88576.1	0	0	132	AMP-dependent synthetase and ligase
BN973_02942	CDO88573.1	0	0	128	acetyl-CoA acetyltransferase
BN973_02943	CDO88574.1	0	0	118	transcriptional regulator
BN973_02940	CDO88571.1	0	0	195	2-nitropropane dioxygenase
BN973_02941	CDO88572.1	0	0	84	dehydrogenase
BN973_04641	CDO90248.1	0	0	132	putative thiolase
BN973_02948	CDO88579.1	0	0	144	putative nucleic-acid-binding protein containing a Zn-ribbon
BN973_02949	CDO88580.1	0	0	96	lipid-transfer protein
BN973_04640	CDO90247.1	0	0	131	aldehyde dehydrogenase
BN973_04647	CDO90254.1	0	0	117	putative 6-phosphofructokinase
BN973_03966	CDO89586.1	0	0	151	hypothetical protein
BN973_03965	NA	0	0	183	tRNA-Asn
BN973_03964	CDO89585.1	0	0	167	hypothetical protein
BN973_04649	CDO90256.1	0	0	160	putative 6-phosphofructokinase
BN973_03968	CDO89588.1	0	0	97	[Cu-Zn] superoxide dismutase
BN973_05327	CDO90922.1	1	0	110	phosphoribosylformylglycinamidine synthase II
BN973_03051	CDO88682.1	0	0	149	cytochrome P450
BN973_02054	CDO87698.1	0	0	157	hypothetical protein
BN973_02055	CDO87699.1	0	0	196	hypothetical protein
BN973_02056	CDO87700.1	0	0	163	hypothetical protein
BN973_02057	CDO87701.1	0	0	129	2-isopropylmalate synthase
BN973_02050	CDO87694.1	0	0	106	putative nucleic-acid-binding protein containing a Zn-ribbon
BN973_02051	CDO87695.1	0	0	104	acetyl-CoA acetyltransferase
BN973_02052	CDO87696.1	0	0	95	GntR family transcriptional regulator
BN973_02053	CDO87697.1	0	0	144	regulator of Sig8
BN973_02058	CDO87702.1	0	0	174	cytochrome P450
BN973_02059	CDO87703.1	0	0	169	TetR family transcriptional regulator
BN973_05187	CDO90787.1	0	0	161	ferredoxin
BN973_05186	CDO90786.1	0	0	225	3-oxoacyl-(acyl-carrier-protein) reductase, putative
BN973_00357	CDO86019.1	0	0	182	WXG repeat protein
BN973_01626	CDO87274.1	0	0	257	_1 transposase
BN973_01627	CDO87275.1	0	0	144	PPE family protein
BN973_01624	CDO87272.1	0	0	320	13E12 repeat-containing protein
BN973_01625	CDO87273.1	0	0	66	hypothetical protein
BN973_01622	CDO87270.1	0	0	130	thymidine phosphorylase
BN973_01623	CDO87271.1	0	0	158	adenosine deaminase
BN973_01620	CDO87268.1	1	0	243	succinate dehydrogenase cytochrome B-556 subunit
BN973_01621	CDO87269.1	0	0	192	cytidine deaminase
BN973_00156	CDO85823.1	0	1	115	oxidoreductase, short chain dehydrogenase/reductase
BN973_00351	CDO86013.1	0	0	125	ESX-1 secretion-associated protein EspH
BN973_01628	CDO87276.1	0	0	137	GntR family transcriptional regulator
BN973_01629	CDO87277.1	0	0	158	gentisate 1,2-dioxygenase
BN973_00353	CDO86015.1	0	0	204	ESX-1 secretion system protein EccB1
BN973_03295	CDO88925.1	0	0	198	ketosteroid isomerase-like protein
BN973_00352	CDO86014.1	0	0	154	ESX-1 secretion system protein EccA1
BN973_01082	CDO86737.1	0	0	143	LpqM protein
BN973_01083	CDO86738.1	0	0	163	postpolyketide modification protein
BN973_01080	CDO86735.1	0	0	145	peptidase, M28 family protein
BN973_01081	CDO86736.1	0	1	150	peptidase, M28 family protein
BN973_01086	CDO86741.1	0	0	148	hypothetical protein
BN973_01087	CDO86742.1	0	0	152	proline and glycine rich transmembrane protein
BN973_01084	CDO86739.1	0	0	193	postpolyketide modification protein
BN973_01085	CDO86740.1	0	0	145	TetR family transcriptional regulator
BN973_01088	CDO86743.1	0	0	160	hypothetical protein
BN973_01089	CDO86744.1	0	0	172	hypothetical protein
BN973_00975	NA	0	0	148	tRNA-Gly
BN973_00974	CDO86630.1	0	0	141	hypothetical protein
BN973_00977	CDO86632.1	1	0	145	deoxycytidine triphosphate deaminase
BN973_00976	CDO86631.1	0	1	151	NLP/P60 family protein
BN973_00971	CDO86627.1	0	0	153	FHA domain-containing protein
BN973_00970	CDO86626.1	0	0	179	carveol-like dehydrogenase
BN973_00973	CDO86629.1	0	0	203	sulfotransferase
BN973_00972	CDO86628.1	0	0	225	hypothetical protein
BN973_00979	CDO86634.1	0	0	447	hypothetical protein
BN973_00978	CDO86633.1	0	0	149	FHA domain-containing protein
BN973_00155	CDO85822.1	0	0	122	putative regulatory protein
BN973_04464	CDO90073.1	1	0	141	acyl-CoA synthetase
BN973_04463	CDO90072.1	0	1	136	major facilitator family protein transporter
BN973_04541	CDO90148.1	0	0	118	phytoene dehydrogenase--like protein
BN973_04462	CDO90071.1	1	0	127	transferase
BN973_04461	CDO90070.1	0	0	148	hypothetical protein
BN973_05491	CDO91085.1	0	0	109	protein kinase
BN973_04460	CDO90069.1	1	0	127	succinyl-diaminopimelate desuccinylase
BN973_00287	CDO85950.1	0	0	151	cutinase
BN973_00286	CDO85949.1	0	0	193	long-chain-fatty-acid--CoA ligase
BN973_00285	CDO85948.1	1	0	165	polyketide synthase
BN973_00284	CDO85947.1	1	0	184	propionyl-CoA carboxylase beta chain
BN973_00283	CDO85946.1	0	0	136	methoxy mycolic acid synthase 2
BN973_00282	CDO85945.1	0	0	118	putative acyl-CoA dehydrogenase
BN973_00281	CDO85944.1	0	0	152	glutaminase
BN973_00280	CDO85943.1	0	0	181	hypothetical protein
BN973_00289	CDO85952.1	0	0	309	antigen 85-A
BN973_00288	CDO85951.1	0	0	213	secreted Mpt51/Mpb51 antigen protein FbpD
BN973_03958	CDO89579.1	0	0	187	major membrane protein 1
BN973_03959	CDO89580.1	0	0	155	TQXA domain protein
BN973_03952	CDO89573.1	0	1	134	virulence factor Mce
BN973_03953	CDO89574.1	0	0	150	mce3
BN973_04670	CDO90277.1	0	0	121	hypothetical protein
BN973_04671	CDO90278.1	0	0	179	MarR family transcriptional regulator
BN973_03956	CDO89577.1	0	0	121	hypothetical protein
BN973_04677	CDO90284.1	0	0	101	TetR family transcriptional regulator
BN973_03954	CDO89575.1	0	0	136	TrnB2 protein
BN973_03955	CDO89576.1	0	1	118	TrnB1 protein
BN973_01888	CDO87534.1	0	0	158	zinc-binding dehydrogenase
BN973_01889	CDO87535.1	0	0	131	oxidoreductase
BN973_04545	CDO90152.1	0	0	132	hypothetical protein
BN973_01882	CDO87528.1	0	0	126	acyl-CoA dehydrogenase
BN973_01883	CDO87529.1	0	0	99	TetR family transcriptional regulator
BN973_01880	CDO87526.1	0	0	144	aminoglycoside phosphotransferase
BN973_01881	CDO87527.1	0	0	145	aminoglycoside phosphotransferase
BN973_01886	CDO87532.1	0	0	154	Alpha/beta hydrolase family protein
BN973_01887	CDO87533.1	0	0	125	homogentisate 1,2-dioxygenase
BN973_01884	CDO87530.1	0	0	145	3-hydroxy-3-methylglutaryl-CoA lyase
BN973_01885	CDO87531.1	0	0	146	caib/baif family protein
BN973_00759	CDO86416.1	0	0	110	FAD linked oxidase
BN973_00758	CDO86415.1	0	0	152	hypothetical protein
BN973_00029	CDO85699.1	0	0	119	lyase
BN973_00028	CDO85698.1	1	0	164	secreted protein
BN973_00154	CDO85821.1	0	0	106	alpha/beta hydrolase
BN973_00751	CDO86408.1	0	0	195	homoserine dehydrogenase
BN973_00750	CDO86407.1	0	0	162	hypothetical protein
BN973_00753	CDO86410.1	0	0	204	Ser/Thr protein kinase
BN973_00752	CDO86409.1	0	0	137	3-alpha-(or 20-beta)-hydroxysteroid dehydrogenase
BN973_00755	CDO86412.1	0	0	202	hypothetical protein
BN973_00754	CDO86411.1	0	0	146	transcriptional regulator
BN973_00757	CDO86414.1	0	0	153	hypothetical protein
BN973_00756	CDO86413.1	0	0	189	hypothetical protein
BN973_03488	CDO89117.1	0	0	142	cytochrome P450
BN973_03489	CDO89118.1	0	0	144	TetR family transcriptional regulator
BN973_04458	CDO90067.1	1	0	152	lysine decarboxylase superfamily protein
BN973_04459	CDO90068.1	0	0	113	TPR repeat-containing protein
BN973_03484	CDO89113.1	0	0	168	TetR family transcriptional regulator
BN973_03485	CDO89114.1	0	0	152	hypothetical protein
BN973_04454	CDO90063.1	0	0	195	DivIVA domain-containing protein
BN973_03487	CDO89116.1	0	0	138	SnoaL-like polyketide cyclase
BN973_03480	CDO89109.1	0	0	132	metal-dependent hydrolase
BN973_03481	CDO89110.1	0	0	143	TetR family transcriptional regulator
BN973_03482	CDO89111.1	0	0	123	hypothetical protein
BN973_03483	CDO89112.1	0	0	118	hypothetical protein
BN973_02539	CDO88175.1	0	0	114	extracellular solute-binding protein, family protein 5
BN973_02538	CDO88174.1	0	0	176	preprotein translocase subunit SecF
BN973_02537	CDO88173.1	0	0	123	preprotein translocase subunit SecD
BN973_02536	CDO88172.1	1	0	192	preprotein translocase subunit YajC
BN973_02535	CDO88171.1	0	0	146	4-aminobutyrate aminotransferase
BN973_02534	CDO88170.1	0	0	176	acyl-CoA dehydrogenase
BN973_02533	CDO88169.1	0	1	171	hypothetical protein
BN973_02532	CDO88168.1	0	0	113	transmembrane protein
BN973_02531	CDO88167.1	1	0	117	Holliday junction DNA helicase RuvB
BN973_02530	CDO88166.1	1	0	129	Holliday junction DNA helicase RuvA
BN973_03228	CDO88858.1	0	0	166	membrane protein
BN973_03229	CDO88859.1	0	0	172	hypothetical protein
BN973_03220	CDO88850.1	0	1	68	resuscitation-promoting factor RpfA
BN973_03221	CDO88851.1	0	0	124	chorismate mutase
BN973_03222	CDO88852.1	0	0	306	antigen 85-B
BN973_03223	CDO88853.1	0	0	149	FHA domain-containing protein
BN973_03224	CDO88854.1	0	0	106	O-methyltransferase
BN973_03225	CDO88855.1	0	0	108	hypothetical protein
BN973_03226	CDO88856.1	0	0	147	cytochrome P450 124
BN973_03227	CDO88857.1	0	0	149	hypothetical protein
BN973_02281	CDO87923.1	0	0	147	malate:quinone oxidoreductase
BN973_02280	CDO87922.1	0	0	127	lysophospholipase
BN973_02283	CDO87925.1	0	0	110	magnesium chelatase
BN973_02282	CDO87924.1	0	0	211	acetyltransferase, gnat family protein
BN973_02285	CDO87927.1	0	0	100	cobyrinic Acid a,c-diamide synthase
BN973_02284	CDO87926.1	0	0	148	cob(I)alamin adenosyltransferase CobO
BN973_02287	CDO87929.1	0	0	130	transporter, major facilitator family protein
BN973_02286	CDO87928.1	0	0	112	multifunctional enzyme siroheme synthase CysG
BN973_02289	CDO87931.1	0	0	157	hypothetical protein
BN973_02288	CDO87930.1	0	0	137	hypothetical protein
BN973_03630	CDO89257.1	1	0	189	phospho-N-acetylmuramoyl-pentapeptide-transferase
BN973_04425	CDO90034.1	0	0	126	LpqZ protein
BN973_01161	CDO86814.1	1	0	153	3-hydroxybutyryl-CoA dehydrogenase
BN973_01160	CDO86813.1	0	0	216	isocitrate lyase
BN973_01163	CDO86816.1	0	0	181	mycolic acid synthase PcaA
BN973_01162	CDO86815.1	0	0	177	mycolic acid synthase UmaA
BN973_01165	CDO86818.1	0	0	144	transmembrane protein
BN973_01164	CDO86817.1	1	0	120	TetR family transcriptional regulator
BN973_01167	CDO86820.1	0	0	127	iron-regulated heparin binding hemagglutinin HbhA
BN973_01166	CDO86819.1	0	0	201	XRE family transcriptional regulator
BN973_01169	CDO86822.1	0	0	203	putative secreted protein
BN973_01168	CDO86821.1	0	0	189	transmembrane protein
BN973_05088	CDO90689.1	0	0	159	putative dioxygenase
BN973_05089	CDO90690.1	0	0	131	glyoxalase
BN973_05086	CDO90687.1	0	0	139	PPE family protein
BN973_05087	CDO90688.1	0	0	159	keto acyl-CoA thiolase
BN973_05084	CDO90685.1	0	0	126	hypothetical protein
BN973_05085	CDO90686.1	0	0	185	general substrate transporter
BN973_05082	CDO90683.1	0	0	138	integral membrane sensor signal transduction histidine kinase
BN973_05083	CDO90684.1	0	0	154	two component LuxR family transcriptional regulator
BN973_05080	CDO90681.1	0	0	91	diguanylate cyclase
BN973_05081	CDO90682.1	0	0	168	hypothetical protein
BN973_00566	CDO86224.1	0	0	132	selenocysteine-specific translation elongation factor SelB
BN973_00567	CDO86225.1	0	0	130	FAD dependent oxidoreductase
BN973_05260	CDO90860.1	0	0	115	3-(3-hydroxyphenyl)propionate hydroxylase
BN973_00565	CDO86223.1	0	0	128	selenocysteine synthase
BN973_00562	CDO86221.1	0	1	174	polysulphide reductase
BN973_00563	CDO86222.1	0	0	143	thiamine-monophosphate kinase
BN973_00560	CDO86219.1	0	1	135	formate dehydrogenase, alpha subunit
BN973_00561	CDO86220.1	0	1	135	4Fe-4S ferredoxin iron-sulfur binding domain-containing protein
BN973_05268	CDO90868.1	0	0	86	beta-ketoacyl CoA thiolase
BN973_05269	CDO90869.1	0	0	236	proline imino-peptidase
BN973_00568	CDO86226.1	0	0	95	sensor histidine kinase
BN973_00569	CDO86227.1	0	0	128	membrane protein, MmpL family protein
BN973_04027	CDO89647.1	0	0	155	hypothetical protein
BN973_04026	CDO89646.1	0	0	119	salicylate synthase MbtI
BN973_04025	CDO89645.1	0	0	115	putative transcriptional regulator
BN973_03036	CDO88667.1	0	0	145	hypothetical protein
BN973_03031	CDO88662.1	0	0	156	short chain dehydrogenase
BN973_03030	CDO88661.1	0	0	114	dehydrogenase
BN973_04021	CDO89641.1	0	0	146	lipK
BN973_04020	CDO89640.1	0	0	149	Methane/Phenol/Toluene Hydroxylase
BN973_03039	CDO88670.1	0	0	129	amidohydrolase
BN973_03038	CDO88669.1	0	0	139	class II aldolase
BN973_04029	CDO89649.1	0	0	137	coproporphyrinogen III oxidase
BN973_04028	CDO89648.1	0	0	152	membrane permease
BN973_04673	CDO90280.1	0	0	150	aminoglycoside phosphotransferase
BN973_05459	CDO91053.1	0	0	177	acetaldehyde dehydrogenase
BN973_05538	CDO91132.1	0	0	171	putative secreted protein
BN973_04101	CDO89721.1	1	0	138	gamma-glutamyl kinase
BN973_03734	CDO89359.1	0	0	115	hypothetical protein
BN973_04103	CDO89723.1	1	0	289	50S ribosomal protein L27
BN973_04104	CDO89724.1	1	0	231	50S ribosomal protein L21
BN973_04105	CDO89725.1	0	0	160	PPE family protein
BN973_03730	CDO89355.1	0	0	157	glyoxalase/bleomycin resistance protein/dioxygenase
BN973_02078	CDO87722.1	0	0	188	Serine/threonine-protein kinase B
BN973_02079	CDO87723.1	0	0	229	hypothetical protein
BN973_02076	CDO87720.1	0	0	192	ribonucleotide-diphosphate reductase subunit beta
BN973_02077	CDO87721.1	0	0	120	hypothetical protein
BN973_02074	CDO87718.1	0	0	146	FAD dependent oxidoreductase
BN973_02075	CDO87719.1	0	0	120	TetR family transcriptional regulator
BN973_02072	CDO87716.1	0	0	123	TetR family transcriptional regulator
BN973_02073	CDO87717.1	0	1	106	polyketide cyclase/dehydrase and lipid transport
BN973_02070	CDO87714.1	0	0	168	short-chain dehydrogenase
BN973_02071	CDO87715.1	0	0	106	TetR family transcriptional regulator
BN973_05451	CDO91045.1	0	0	123	hypothetical protein
BN973_00130	CDO85797.1	0	0	131	putative F420-dependent oxidoreductase, family
BN973_00133	CDO85800.1	0	0	134	hypothetical protein
BN973_05320	CDO90915.1	0	0	159	glycine cleavage T-protein (aminomethyl transferase)
BN973_05455	CDO91049.1	0	0	108	short chain dehydrogenase
BN973_00134	CDO85801.1	0	0	150	TetR family transcriptional regulator
BN973_00137	CDO85804.1	0	0	146	TetR family transcriptional regulator
BN973_00136	CDO85803.1	0	0	197	oxidoreductase, SDR family
BN973_04328	CDO89938.1	1	0	140	glycosyl transferase, group 4 family protein
BN973_04329	CDO89939.1	1	0	124	Sua5/YciO/YrdC/YwlC family protein
BN973_03440	CDO89069.1	0	0	150	hypothetical protein
BN973_03441	CDO89070.1	0	0	71	hypothetical protein
BN973_03114	CDO88745.1	0	0	524	esat-6 like protein
BN973_03443	CDO89072.1	0	0	143	phospholipase, patatin family protein
BN973_03444	CDO89073.1	0	0	110	glycerol-phosphate porter
BN973_04325	CDO89935.1	1	0	241	ATP synthase F0 subunit C
BN973_04326	CDO89936.1	1	0	218	F0F1 ATP synthase subunit A
BN973_04327	CDO89937.1	0	0	193	ATP synthase I
BN973_00919	CDO86575.1	0	0	135	PPE family protein
BN973_00918	CDO86574.1	0	0	167	methyltransferase, putative, family protein
BN973_00917	CDO86573.1	0	0	140	PPE family protein
BN973_00916	CDO86572.1	0	0	85	PPE family protein
BN973_00915	CDO86571.1	0	0	151	hypothetical protein
BN973_00914	CDO86570.1	0	1	127	TetR family transcriptional regulator
BN973_00913	CDO86569.1	0	1	148	hypothetical protein
BN973_00912	CDO86568.1	0	0	150	glyoxalase/bleomycin resistance protein/dioxygenase
BN973_00911	CDO86567.1	0	0	145	TetR family transcriptional regulator
BN973_00910	CDO86566.1	0	0	171	Esterase/lipase
BN973_00488	CDO86147.1	0	0	193	organic solvents resistance ABC transporter permease
BN973_01663	CDO87310.1	0	0	143	putative S-adenosyl-L-methionine-dependent methyltransferase
BN973_03938	CDO89559.1	0	0	158	phytase
BN973_04619	CDO90226.1	0	0	109	ferredoxin
BN973_03934	CDO89555.1	0	0	92	cobalt transport protein
BN973_04615	CDO90222.1	0	0	137	alpha/beta hydrolase
BN973_04616	CDO90223.1	0	0	121	molybdopterin oxidoreductase
BN973_04617	CDO90224.1	0	0	143	bile acid transporter
BN973_04610	CDO90217.1	0	0	156	homogentisate 1,2-dioxygenase
BN973_03931	CDO89552.1	0	0	70	AsnC family transcriptional regulator
BN973_04612	CDO90219.1	0	0	174	hypothetical protein
BN973_03933	CDO89554.1	0	0	130	cyclase/dehydrase
BN973_01208	CDO86861.1	0	0	180	acyltransferase, putative
BN973_01209	CDO86862.1	0	0	179	GDSL family lipase
BN973_01200	CDO86853.1	0	0	138	glutaredoxin-like protein
BN973_01201	CDO86854.1	1	0	175	glutamyl-tRNA reductase
BN973_01202	CDO86855.1	1	0	158	porphobilinogen deaminase
BN973_01203	CDO86856.1	1	0	183	uroporphyrin-III C-methyltransferase HemD
BN973_01204	CDO86857.1	1	0	165	delta-aminolevulinic acid dehydratase
BN973_01205	CDO86858.1	0	0	227	transmembrane protein
BN973_01206	CDO86859.1	0	0	182	transmembrane protein
BN973_01207	CDO86860.1	0	0	259	STAS domain-containing protein
BN973_00009	CDO85679.1	0	0	151	periplasmic dipeptide-binding lipoprotein DppA
BN973_00008	CDO85678.1	0	0	179	ABC transporter permease
BN973_00005	CDO85675.1	0	0	124	hypothetical protein
BN973_00004	CDO85674.1	0	0	110	HAD-superfamily protein subfamily protein IB hydrolase
BN973_00007	CDO85677.1	0	0	159	ABC transporter permease
BN973_00006	CDO85676.1	0	0	125	dipeptide-transport ATP-binding protein ABC transporter DPPD
BN973_00001	CDO85672.1	0	0	112	hypothetical protein
BN973_05520	CDO91114.1	0	0	209	hypothetical protein
BN973_05523	CDO91117.1	0	0	166	hydrolase, alpha/beta hydrolase family protein
BN973_00002	CDO85673.1	0	0	190	helicase/secretion CpaE-like protein
BN973_02511	CDO88147.1	0	0	131	alpha/beta fold hydrolase
BN973_02510	CDO88146.1	0	0	103	thioesterase
BN973_02513	CDO88149.1	1	0	147	threonyl-tRNA synthetase
BN973_02512	CDO88148.1	0	0	210	hypothetical protein
BN973_02515	CDO88151.1	0	0	190	CDP-alcohol phosphatidyltransferase
BN973_02514	CDO88150.1	1	0	140	diadenosine tetraphosphate
BN973_02517	CDO88153.1	1	0	155	phosphatidylinositol alpha-mannosyltransferase
BN973_02516	CDO88152.1	0	0	108	lipid A biosynthesis lauroyl acyltransferase
BN973_02519	CDO88155.1	0	0	159	PE family protein
BN973_02518	CDO88154.1	0	0	124	membrane protein
BN973_03202	CDO88832.1	0	0	171	PPOX class F420-dependent protein
BN973_03203	CDO88833.1	0	0	146	enoyl-CoA hydratase, EchA8_6
BN973_03200	CDO88830.1	0	0	125	hydrogen peroxide-inducible genes activator, OxyR
BN973_03201	CDO88831.1	0	0	153	hypothetical protein
BN973_03206	CDO88836.1	0	1	118	drug transporter
BN973_03207	CDO88837.1	0	0	125	carboxymuconolactone decarboxylase
BN973_03204	CDO88834.1	0	0	178	bacterioferritin-associated ferredoxin
BN973_03205	CDO88835.1	0	0	214	bacterioferritin
BN973_03208	CDO88838.1	0	0	159	glutamine synthetase catalytic domain-containing protein
BN973_03209	CDO88839.1	0	0	147	amidohydrolase
BN973_05153	CDO90753.1	0	0	111	aminotransferase
BN973_05060	CDO90662.1	0	0	159	short chain dehydrogenase
BN973_05061	CDO90663.1	0	0	140	hypothetical protein
BN973_05062	CDO90664.1	0	0	136	short chain dehydrogenase
BN973_05063	CDO90665.1	0	0	170	manganese transport protein MntH
BN973_05064	CDO90666.1	0	0	122	hypothetical protein
BN973_05065	CDO90667.1	0	0	119	phage-related replication protein
BN973_05066	CDO90668.1	0	0	141	oxidoreductase
BN973_05067	NA	0	0	103	tRNA-Arg
BN973_05068	CDO90669.1	0	0	128	helix-turn-helix domain-containing protein
BN973_05069	CDO90670.1	0	0	148	hypothetical protein
BN973_05518	CDO91112.1	0	0	105	DNA repair protein RadA
BN973_04778	CDO90385.1	0	0	140	alpha-methylacyl-CoA racemase
BN973_05204	CDO90804.1	0	0	105	ferredoxin
BN973_05205	CDO90805.1	0	0	109	acyl-CoA dehydrogenase domain-containing protein
BN973_05206	CDO90806.1	0	0	98	F420-dependent oxidoreductase, family
BN973_05207	CDO90807.1	0	0	145	hypothetical protein
BN973_05200	CDO90800.1	0	0	116	Rieske (2Fe-2S) domain-containing protein
BN973_05201	CDO90801.1	0	0	190	hydrolase
BN973_05202	CDO90802.1	0	0	149	hypothetical protein
BN973_05203	CDO90803.1	0	0	122	respiratory-chain NADH dehydrogenase 51 kd subunit family protein
BN973_05208	CDO90808.1	0	0	179	NAD-dependent epimerase/dehydratase
BN973_05209	CDO90809.1	0	0	119	hypothetical protein
BN973_02244	CDO87886.1	0	0	148	siderophore utilization protein
BN973_02242	CDO87884.1	0	0	481	PPE family protein
BN973_04009	CDO89629.1	0	0	183	hypothetical protein
BN973_04008	CDO89628.1	0	0	243	hypothetical protein
BN973_04559	CDO90166.1	0	0	94	acyl-CoA thioesterase
BN973_04558	CDO90165.1	0	0	129	3-ketoacyl-(acyl-carrier-protein) reductase
BN973_03059	CDO88690.1	0	0	121	peptidase, M24 family protein
BN973_03058	CDO88689.1	0	1	146	peptidase, M24 family protein
BN973_03057	CDO88688.1	0	0	160	REP13E12 repeat protein
BN973_04552	CDO90159.1	0	0	114	TetR family transcriptional regulator
BN973_03055	CDO88686.1	0	0	155	clavaldehyde dehydrogenase
BN973_03054	CDO88685.1	0	0	118	caib/baif family protein
BN973_03053	CDO88684.1	0	0	149	enoyl-CoA hydratase/carnithine racemase
BN973_03052	CDO88683.1	0	0	158	carveol dehydrogenase
BN973_04555	CDO90162.1	0	0	165	Alpha/beta hydrolase family protein
BN973_03050	CDO88681.1	0	0	151	TetR family transcriptional regulator
BN973_02898	CDO88530.1	0	0	71	TPR repeat-containing protein
BN973_02899	CDO88531.1	0	0	91	phosphatase
BN973_02890	CDO88522.1	0	0	86	Trm112p-like protein
BN973_02891	CDO88523.1	0	0	77	TetR family transcriptional regulator
BN973_02892	CDO88524.1	0	0	114	ABC transporter efflux protein, DrrB family protein
BN973_02893	CDO88525.1	0	0	127	ABC transporter ATP-binding protein
BN973_02894	CDO88526.1	0	0	186	ammonium transporter
BN973_02895	CDO88527.1	0	0	159	3-methyladenine DNA glycosylase
BN973_02896	CDO88528.1	1	0	142	tyrosyl-tRNA synthase
BN973_02897	CDO88529.1	0	0	142	lipoprotein LprJ
BN973_04051	CDO89671.1	0	0	135	hypothetical alanine and glycine rich protein
BN973_02090	CDO87734.1	0	0	182	Ser/Thr protein kinase
BN973_02091	CDO87735.1	0	0	272	HNH endonuclease domain-containing protein
BN973_02092	CDO87736.1	0	0	181	Barstar (barnase inhibitor)
BN973_02093	CDO87737.1	0	0	134	methyltransferase, UbiE/COQ5 family protein
BN973_02094	CDO87738.1	0	0	107	SAM-dependent methyltransferase
BN973_02095	CDO87739.1	0	0	143	immunogenic protein MPB64/MPT64
BN973_02096	CDO87740.1	0	0	146	FOG: WD40-like repeat protein
BN973_02097	CDO87741.1	0	0	101	putative transferase
BN973_02098	CDO87742.1	0	0	102	hypothetical protein
BN973_02099	CDO87743.1	0	0	131	phr protein
BN973_05511	CDO91105.1	0	0	142	glycerophosphoryl diester phosphodiesterase
BN973_05512	CDO91106.1	1	0	139	tRNA/rRNA methyltransferase
BN973_05513	CDO91107.1	1	0	144	cysteinyl-tRNA synthetase
BN973_05514	CDO91108.1	1	0	121	2-C-methyl-D-erythritol 2,4-cyclodiphosphate synthase
BN973_04650	CDO90257.1	0	0	146	aminoglycoside phosphotransferase
BN973_05121	CDO90722.1	0	0	153	cyclase/dehydrase
BN973_05578	CDO91171.1	0	0	120	Flp pilus assembly protein TadC
BN973_05120	CDO90721.1	0	0	219	transmembrane protein
BN973_05579	CDO91172.1	0	0	132	transmembrane protein
BN973_05123	CDO90724.1	1	0	127	transmembrane protein
BN973_05576	CDO91169.1	0	0	131	hypothetical protein
BN973_05122	CDO90723.1	0	0	182	hypothetical protein
BN973_05577	CDO91170.1	0	0	113	hypothetical protein
BN973_05125	CDO90726.1	0	0	132	glutathione S-transferase
BN973_05515	CDO91109.1	0	0	237	2-C-methyl-D-erythritol 4-phosphate cytidylyltransferase
BN973_05574	CDO91167.1	0	0	164	hypothetical protein
BN973_05124	CDO90725.1	0	0	219	hypothetical protein
BN973_05575	CDO91168.1	0	0	131	helicase/secretion neighborhood TadE-like protein
BN973_05127	CDO90728.1	1	0	189	CspB
BN973_05572	CDO91165.1	1	0	978	cold shock protein A CspA
BN973_05126	CDO90727.1	0	0	99	putative acyl-CoA dehydrogenase
BN973_05573	CDO91166.1	0	0	141	ATP-dependent rna helicase, dead/deah box family protein
BN973_05570	CDO91163.1	1	0	166	DNA topoisomerase I
BN973_05516	CDO91110.1	1	0	385	transcription factor
BN973_05571	CDO91164.1	1	0	159	hypothetical protein
BN973_00931	CDO86587.1	0	0	125	prolyl oligopeptidase family protein
BN973_00930	CDO86586.1	0	0	106	transmembrane protein
BN973_00933	CDO86589.1	0	0	157	sulfatase
BN973_00932	CDO86588.1	0	0	127	trans-aconitate 2-methyltransferase
BN973_00935	CDO86591.1	0	0	168	hypothetical protein
BN973_00934	CDO86590.1	0	0	115	cob(II)yrinic acid a,c-diamide reductase
BN973_00937	CDO86593.1	0	0	202	transcriptional regulator
BN973_00936	CDO86592.1	0	0	191	alpha/beta hydrolase
BN973_00939	CDO86595.1	0	0	119	hypothetical protein
BN973_00938	CDO86594.1	0	0	103	hypothetical protein
BN973_03508	CDO89137.1	0	0	157	dihydrodipicolinate reductase
BN973_03505	CDO89134.1	0	0	166	hypothetical protein
BN973_03504	CDO89133.1	0	0	115	hypothetical protein
BN973_03507	CDO89136.1	0	0	165	hypothetical protein
BN973_03506	CDO89135.1	0	0	99	hypothetical protein
BN973_03501	CDO89130.1	0	0	225	hypothetical protein
BN973_03500	CDO89129.1	0	0	270	hypothetical protein
BN973_03503	CDO89132.1	0	0	105	CbbQ/NirQ/NorQ/GpvN family protein
BN973_03502	CDO89131.1	0	0	152	MorD protein
BN973_00243	CDO85909.1	0	0	253	hypothetical protein
BN973_00242	CDO85908.1	0	0	189	hypothetical protein
BN973_00241	CDO85907.1	0	0	178	hypothetical protein
BN973_00240	CDO85906.1	0	0	136	hypothetical protein
BN973_00247	CDO85911.1	0	0	178	hypothetical protein
BN973_00246	CDO85910.1	0	0	132	histidinol-phosphate aminotransferase HisC2
BN973_00245	NA	0	0	239	tRNA-Ser
BN973_00244	NA	0	0	171	tRNA-Arg
BN973_00249	CDO85913.1	0	0	140	hypothetical protein
BN973_00248	CDO85912.1	0	0	261	ESX-1 secretion-associated protein EspH
BN973_04636	CDO90243.1	0	0	128	Rieske (2Fe-2S) domain-containing protein
BN973_04637	CDO90244.1	0	0	160	cytochrome P450
BN973_04634	CDO90241.1	0	0	147	short-chain dehydrogenase/reductase SDR
BN973_04635	CDO90242.1	0	0	140	short-chain dehydrogenase/reductase SDR
BN973_04632	CDO90239.1	0	0	251	caa(3)-type oxidase, subunit IV
BN973_04633	CDO90240.1	0	0	162	hypothetical protein
BN973_04630	CDO90237.1	0	0	238	hypothetical protein
BN973_04631	CDO90238.1	0	0	133	heme/copper-type cytochrome/quinol oxidase, subunit 3
BN973_04638	CDO90245.1	0	0	166	NAD-dependent aldehyde dehydrogenase
BN973_03919	NA	0	0	201	tRNA-Met
BN973_01222	CDO86875.1	1	0	193	cytochrome C-type biogenesis protein CcsB
BN973_01223	CDO86876.1	0	0	166	chromosome partitioning ATPase
BN973_01220	CDO86873.1	1	0	154	cytochrome C-type biogenesis protein, CcsA
BN973_01221	CDO86874.1	1	0	151	ResB-family protein
BN973_01226	CDO86879.1	0	0	171	3-oxoacyl-(acyl carrier protein) synthase III
BN973_01227	CDO86880.1	1	0	122	1,4-dihydroxy-2-naphthoate octaprenyltransferase
BN973_01224	CDO86877.1	0	0	227	hypothetical protein
BN973_01225	CDO86878.1	0	0	138	hypothetical protein
BN973_01228	CDO86881.1	0	0	99	5'-methylthioadenosine phosphorylase
BN973_01229	CDO86882.1	0	0	114	UDP-glucose 4-epimerase
BN973_00795	CDO86452.1	0	0	262	mce associated membrane protein
BN973_00794	CDO86451.1	0	0	171	Mce associated protein
BN973_00797	CDO86454.1	0	0	207	lprO
BN973_00796	CDO86453.1	0	1	140	putative membrane protein
BN973_00063	CDO85732.1	0	0	192	integral membrane protein
BN973_00790	CDO86447.1	0	0	181	virulence factor Mce
BN973_00793	CDO86450.1	0	0	135	RDD family protein
BN973_00792	CDO86449.1	0	0	164	Mce associated membrane protein
BN973_00799	CDO86456.1	0	0	109	Pirin-like protein
BN973_00798	CDO86455.1	0	0	147	transmembrane protein
BN973_00069	CDO85738.1	0	0	157	thiopurine S-methyltransferase (tpmt) superfamily protein
BN973_00068	CDO85737.1	0	0	173	CBS domain-containing protein
BN973_04277	CDO89891.1	0	0	115	transmembrane ABC transporter ATP-binding protein
BN973_04498	CDO90105.1	0	0	146	hypothetical protein
BN973_04499	CDO90106.1	0	0	188	hypothetical protein
BN973_04492	CDO90099.1	1	0	151	N-succinyldiaminopimelate aminotransferase
BN973_04493	CDO90100.1	1	0	173	ferredoxin fdxC
BN973_04490	CDO90097.1	0	0	143	alpha/beta hydrolase
BN973_04491	CDO90098.1	0	1	150	OB-fold nucleic acid binding domain-containing protein
BN973_04496	CDO90103.1	0	0	127	hypothetical protein
BN973_04497	CDO90104.1	1	0	146	FO synthase
BN973_04494	CDO90101.1	0	1	269	low molecular weight T-cell antigen TB8.4
BN973_04495	CDO90102.1	0	0	166	hypothetical protein
BN973_04274	CDO89888.1	0	0	138	fatty-acid--CoA ligase
BN973_04272	CDO89886.1	0	0	104	putative acyl-CoA dehydrogenase
BN973_03264	CDO88894.1	0	0	164	limonene 1,2-monooxygenase
BN973_03265	CDO88895.1	0	0	135	hydroxylase
BN973_03266	CDO88896.1	0	0	170	Polyketide cyclase / dehydrase and lipid transport
BN973_03267	CDO88897.1	0	0	154	lipoprotein
BN973_03260	CDO88890.1	0	0	137	hypothetical protein
BN973_03261	CDO88891.1	0	0	165	isocitrate lyase
BN973_03262	CDO88892.1	0	0	291	hypothetical protein
BN973_03263	CDO88893.1	0	0	89	hypothetical protein
BN973_03268	CDO88898.1	0	0	139	lipoprotein
BN973_03269	CDO88899.1	0	0	146	allophanate hydrolase
BN973_02799	CDO88434.1	1	0	131	nicotinate-nucleotide pyrophosphorylase
BN973_02798	CDO88433.1	0	0	140	L-aspartate oxidase
BN973_02797	CDO88432.1	1	0	114	quinolinate synthetase
BN973_02796	CDO88431.1	1	0	126	hydrolase, NUDIX family protein
BN973_02795	CDO88430.1	0	0	153	secretory lipase
BN973_02794	CDO88429.1	0	0	140	putative transmembrane protein
BN973_02793	CDO88428.1	1	0	164	hypothetical protein
BN973_02792	CDO88427.1	1	0	161	biotin synthase
BN973_02791	CDO88426.1	0	0	99	hypothetical protein
BN973_02790	CDO88425.1	0	1	158	hypothetical protein
BN973_04271	CDO89885.1	0	0	193	3-ketoacyl-ACP reductase
BN973_05453	CDO91047.1	0	0	99	hypothetical protein
BN973_02139	CDO87783.1	1	0	301	ketol-acid reductoisomerase
BN973_02138	CDO87782.1	1	0	162	acetolactate synthase 3 regulatory subunit
BN973_02133	CDO87777.1	1	0	165	glutamyl-tRNA(Gln) and/or aspartyl-tRNA(Asn) amidotransferase subunit B
BN973_02132	CDO87776.1	0	0	131	chromosome partitioning ATPase
BN973_02131	CDO87775.1	0	0	140	glucose-methanol-choline oxidoreductase
BN973_02130	CDO87774.1	0	0	129	transcriptional regulatory protein
BN973_02137	CDO87781.1	1	0	148	acetolactate synthase large subunit
BN973_02136	CDO87780.1	0	0	140	low molecular weight protein antigen 6 cfp6
BN973_02135	CDO87779.1	0	0	199	DoxX subfamily protein, putative
BN973_02134	CDO87778.1	1	0	107	lipoprotein LppZ
BN973_05454	CDO91048.1	0	0	119	sulfotransferase family protein
BN973_05457	CDO91051.1	0	0	183	hypothetical protein
BN973_05456	CDO91050.1	0	0	105	hypothetical protein
BN973_05048	CDO90650.1	0	0	126	fumarylacetoacetate hydrolase family protein, putative
BN973_05049	CDO90651.1	0	0	148	ATP-dependent DNA ligase
BN973_05042	CDO90644.1	0	0	157	P-aminobenzoate N-oxygenase AurF
BN973_05043	CDO90645.1	0	0	129	monooxygenase
BN973_05040	CDO90642.1	0	0	121	formamidopyrimidine-DNA glycosylase
BN973_05041	CDO90643.1	0	0	174	precorrin 6A synthase
BN973_05046	CDO90648.1	0	0	127	enoyl-CoA hydratase/isomerase family protein
BN973_05047	CDO90649.1	0	1	226	methyltransferase, putative, family protein
BN973_05044	CDO90646.1	0	0	148	stas domain-containing protein
BN973_05045	CDO90647.1	0	0	146	F420-dependent methylene-tetrahydromethanopterin reductase
BN973_02321	CDO87963.1	1	0	317	polynucleotide phosphorylase
BN973_05228	CDO90828.1	0	0	134	hypothetical protein
BN973_05229	CDO90829.1	0	0	121	amidohydrolase
BN973_05226	CDO90826.1	0	1	156	carboxymuconolactone decarboxylase
BN973_05227	CDO90827.1	0	0	226	Rieske (2Fe-2S) domain-containing protein
BN973_05224	CDO90824.1	0	0	118	fadE12_1
BN973_05225	CDO90825.1	0	0	126	amidohydrolase 2
BN973_05222	CDO90822.1	0	0	145	acetyl-CoA acetyltransferase
BN973_05223	CDO90823.1	0	0	129	enoyl-CoA hydratase/isomerase
BN973_05220	CDO90820.1	0	1	178	hypothetical protein
BN973_05221	CDO90821.1	0	0	104	TetR family transcriptional regulator
BN973_04217	CDO89831.1	0	0	127	acyl-CoA dehydrogenase domain-containing protein
BN973_03970	CDO89590.1	0	0	113	transmembrane protein
BN973_04651	CDO90258.1	0	0	127	3-ketoacyl-ACP reductase
BN973_04652	CDO90259.1	0	0	110	hypothetical protein
BN973_04799	CDO90406.1	0	0	144	virulence factor Mce family protein
BN973_04798	CDO90405.1	0	0	173	virulence factor Mce family protein
BN973_03605	CDO89233.1	0	0	116	lipoprotein LppL
BN973_04791	CDO90398.1	0	0	102	hypothetical protein
BN973_04654	CDO90261.1	0	0	155	luciferase family protein
BN973_04793	CDO90400.1	0	0	133	Mce associated membrane protein
BN973_04792	CDO90399.1	0	0	150	Mce associated membrane protein
BN973_04795	CDO90402.1	0	0	156	Fis family transcriptional regulator
BN973_04794	CDO90401.1	0	0	174	virulence factor Mce
BN973_04797	CDO90404.1	0	0	109	virulence factor Mce
BN973_04655	CDO90262.1	0	0	104	monooxygenase
BN973_04656	CDO90263.1	0	0	184	transmembrane protein
BN973_04657	CDO90264.1	0	0	126	dehydrogenase
BN973_00478	CDO86137.1	1	0	113	50S ribosomal protein L9
BN973_03978	CDO89598.1	1	0	88	ArsR family transcriptional regulator
BN973_05252	CDO90852.1	0	0	146	short-chain dehydrogenase/reductase SDR
BN973_00470	CDO86129.1	0	0	210	membrane protein
BN973_00471	CDO86130.1	1	0	141	hypothetical protein
BN973_00472	CDO86131.1	1	0	172	transglycosylase
BN973_00473	CDO86132.1	0	0	204	transmembrane protein
BN973_00474	CDO86133.1	0	0	130	DJ-1/PfpI family protein
BN973_00555	CDO86214.1	0	0	126	hypothetical protein
BN973_00476	CDO86135.1	1	0	268	single-strand binding protein Ssb
BN973_00477	CDO86136.1	1	0	211	30S ribosomal protein S18
BN973_05250	CDO90850.1	0	0	122	LuxR family transcriptional regulator
BN973_04359	CDO89968.1	0	1	125	putative membrane protein
BN973_05257	CDO90857.1	0	0	130	monoxygenase
BN973_05256	CDO90856.1	0	0	149	3-alpha-hydroxysteroid dehydrogenase
BN973_03071	CDO88702.1	0	0	145	efflux ABC transporter permease
BN973_03070	CDO88701.1	0	0	157	methyltransferase, UbiE/COQ5 family protein
BN973_03073	CDO88704.1	0	0	147	acyltransferase
BN973_03072	CDO88703.1	0	0	112	ABC transporter ATPase
BN973_03075	CDO88706.1	0	0	111	hypothetical protein
BN973_03074	CDO88705.1	0	0	141	hypothetical protein
BN973_03077	CDO88708.1	0	0	131	hypothetical protein
BN973_03076	CDO88707.1	0	0	159	cutinase Cut3
BN973_04575	CDO90182.1	0	0	144	aminoglycoside phosphotransferase
BN973_03078	CDO88709.1	0	1	173	TetR family transcriptional regulator
BN973_04577	CDO90184.1	0	0	129	hypothetical protein
BN973_04576	CDO90183.1	0	0	125	hypothetical protein
BN973_04571	CDO90178.1	0	0	101	TetR family transcriptional regulator
BN973_04570	CDO90177.1	0	0	157	postpolyketide modification protein
BN973_04573	CDO90180.1	0	0	93	feruloyl-CoA synthetase
BN973_04572	CDO90179.1	0	0	111	putative dehydrogenase
BN973_02300	CDO87942.1	0	0	171	exopolyphosphatase-like protein
BN973_02301	CDO87943.1	0	0	158	hypothetical protein
BN973_02302	CDO87944.1	0	0	161	enoyl-CoA hydratase
BN973_02303	CDO87945.1	0	0	171	acetate operon repressor
BN973_02304	CDO87946.1	0	0	180	glyoxylate carboligase
BN973_02305	CDO87947.1	0	0	143	2-hydroxy-3-oxopropionate reductase
BN973_02306	CDO87948.1	0	0	151	hydroxypyruvate isomerase
BN973_02307	CDO87949.1	0	0	135	glycerate kinase
BN973_02308	CDO87950.1	0	0	165	histone deacetylase
BN973_02309	CDO87951.1	0	0	202	hypothetical protein
BN973_01697	CDO87344.1	1	0	174	phosphomannomutase/phosphoglucomutase
BN973_01696	CDO87343.1	0	0	177	hypothetical protein
BN973_01695	CDO87342.1	1	0	184	hypothetical protein
BN973_01694	CDO87341.1	1	0	261	WhiB2
BN973_01693	CDO87340.1	1	0	148	LPPG:FO 2-phospho-L-lactate transferase
BN973_01692	CDO87339.1	1	0	113	F420-0--gamma-glutamyl ligase
BN973_01691	CDO87338.1	0	0	128	DNA methylase
BN973_01690	CDO87337.1	0	0	136	hydrolase, nudix family protein, putative
BN973_04010	CDO89630.1	0	0	218	membrane protein MmpS
BN973_01348	CDO86997.1	1	0	1862	elongation factor Tu
BN973_04011	CDO89631.1	0	0	143	putative membrane protein MmpL
BN973_05197	CDO90797.1	0	0	142	3-hydroxyisobutyrate dehydrogenase
BN973_04351	CDO89960.1	0	0	365	hypothetical protein
BN973_04350	CDO89959.1	0	0	357	putative transposase
BN973_04353	CDO89962.1	0	0	137	short-chain dehydrogenase/reductase SDR
BN973_04824	CDO90431.1	0	1	160	acyl-CoA dehydrogenase domain-containing protein
BN973_04352	CDO89961.1	0	0	164	hypothetical protein
BN973_05508	CDO91102.1	0	0	164	cytochrome P450
BN973_01020	CDO86675.1	0	0	106	xanthine dehydrogenase
BN973_01021	CDO86676.1	0	0	127	carbon monoxide dehydrogenase, medium subunit
BN973_01022	CDO86677.1	0	0	196	carbon monoxyde dehydrogenase small chain CoxS
BN973_01023	CDO86678.1	0	0	115	carbon monoxyde dehydrogenase large subunit
BN973_01024	CDO86679.1	0	0	191	carbon monoxyde dehydrogenase large subunit
BN973_01025	CDO86680.1	0	0	168	carbon monoxide dehydrogenase F protein
BN973_01026	CDO86681.1	0	0	157	oxidoreductase
BN973_01027	CDO86682.1	0	0	161	membrane oxidoreductase
BN973_01028	CDO86683.1	0	0	106	von Willebrand factor type A domain-containing protein
BN973_01029	CDO86684.1	0	0	120	glycosyl hydrolase
BN973_01798	CDO87445.1	1	0	182	putative hydrolase
BN973_01799	CDO87446.1	1	0	187	PDZ domain-containing protein
BN973_00265	CDO85928.1	0	0	137	membrane protease subunit, stomatin/prohibitin
BN973_00264	CDO85927.1	0	0	260	hypothetical protein
BN973_00267	CDO85930.1	0	0	199	membrane protein
BN973_00266	CDO85929.1	0	0	153	nucleoside diphosphate kinase regulator
BN973_00261	CDO85924.1	1	0	134	rfbE
BN973_00260	CDO85923.1	1	0	180	O-antigen/lipopolysaccharide transport ATP-binding protein ABC transporter RfbE
BN973_00263	CDO85926.1	0	0	195	13E12 repeat-containing protein
BN973_00262	CDO85925.1	1	0	164	O-antigen export system, permease protein
BN973_00269	CDO85932.1	1	0	124	short chain dehydrogenase
BN973_00268	CDO85931.1	1	0	140	oxidoreductase, FAD-binding
BN973_04356	CDO89965.1	0	0	105	hypothetical protein
BN973_01244	CDO86897.1	0	0	124	short chain dehydrogenase
BN973_01245	CDO86898.1	1	0	166	naphthoate synthase
BN973_01246	CDO86899.1	0	1	182	cell entry (mce) related family protein
BN973_01247	CDO86900.1	0	0	212	regulatory protein MarR
BN973_01240	CDO86893.1	0	0	110	putative endoIII-related endonuclease
BN973_01241	CDO86894.1	0	1	180	transmembrane protein
BN973_01242	CDO86895.1	0	0	172	phosphate transporter
BN973_01243	CDO86896.1	1	0	205	glyoxalase
BN973_01248	CDO86901.1	0	0	276	reductase
BN973_01249	CDO86902.1	0	0	150	putative dehydrogenase
BN973_03794	CDO89418.1	0	0	138	DNA/RNA helicase
BN973_03795	CDO89419.1	0	0	131	helicase domain-containing protein
BN973_03796	CDO89420.1	0	1	187	glyoxalase
BN973_03797	CDO89421.1	0	1	239	cytochrome P450 superfamily protein
BN973_03790	CDO89414.1	0	0	185	hypothetical protein
BN973_03791	CDO89415.1	0	0	147	hypothetical protein
BN973_03792	CDO89416.1	0	0	158	hypothetical protein
BN973_03793	CDO89417.1	0	0	119	hypothetical protein
BN973_03798	CDO89422.1	0	0	146	putative adenylate/guanylate cyclase
BN973_03799	CDO89423.1	0	0	148	phytanoyl-CoA dioxygenase (PhyH) family protein
BN973_00049	CDO85718.1	0	0	208	serine/threonine protein kinase
BN973_00048	CDO85717.1	0	0	201	antagonist protein RsbS
BN973_00041	CDO85710.1	0	0	226	hypothetical protein
BN973_00040	CDO85709.1	0	0	255	hypothetical protein
BN973_00043	CDO85712.1	0	0	185	UsfY protein
BN973_00042	CDO85711.1	0	0	160	hypothetical protein
BN973_00045	CDO85714.1	0	0	153	membrane protein
BN973_00044	CDO85713.1	0	0	210	hydrolase
BN973_00047	CDO85716.1	0	0	129	anti-anti-sigma regulatory factor
BN973_00046	CDO85715.1	0	0	200	anti-anti-sigma regulatory factor
BN973_03538	CDO89166.1	0	0	92	putative cobalamin biosynthesis protein CobG
BN973_03539	CDO89167.1	0	0	110	precorrin isomerase
BN973_03248	CDO88878.1	0	0	128	carboxymuconolactone decarboxylase
BN973_03249	CDO88879.1	0	0	142	hypothetical protein
BN973_04210	CDO89824.1	0	0	144	putative metal cation transporting P-type ATPase
BN973_03247	CDO88877.1	0	0	145	nitroreductase
BN973_04212	CDO89826.1	0	0	143	putative transcriptional regulatory protein
BN973_03533	CDO89161.1	0	0	160	oxidoreductase, short chain dehydrogenase/reductase
BN973_03242	CDO88872.1	0	0	79	short chain enoyl-CoA hydratase
BN973_03243	CDO88873.1	0	0	142	anti-anti-sigma factor
BN973_03536	CDO89164.1	0	0	80	phospholipase/carboxylesterase
BN973_03241	CDO88871.1	0	0	183	membrane protein
BN973_04948	CDO90551.1	1	0	154	50S ribosomal protein L25/general stress protein Ctc
BN973_02119	CDO87763.1	0	0	115	methionine synthase, vitamin-B12 independent, putative
BN973_02118	CDO87762.1	0	1	162	lpqA
BN973_02115	CDO87759.1	1	0	135	aminotransferase
BN973_02114	CDO87758.1	0	0	138	lyso-ornithine lipid acyltransferase
BN973_02117	CDO87761.1	0	0	118	hypothetical protein
BN973_02116	CDO87760.1	1	0	114	tRNA-specific 2-thiouridylase MnmA
BN973_02111	CDO87755.1	0	0	124	long-chain-fatty-acid--CoA ligase
BN973_02110	CDO87754.1	0	0	156	acyl carrier protein
BN973_02113	CDO87757.1	0	0	139	putative hemolysin
BN973_02112	CDO87756.1	0	0	132	8-amino-7-oxononanoate synthase
BN973_04335	CDO89945.1	1	0	107	threonine synthase
BN973_01491	CDO87140.1	0	0	130	oxidoreductase
BN973_01490	CDO87139.1	0	0	139	oxidoreductase
BN973_01493	CDO87142.1	0	0	98	hypothetical protein
BN973_01492	CDO87141.1	0	0	110	methylase involved in ubiquinone/menaquinone biosynthesis
BN973_01495	CDO87144.1	0	0	125	hypothetical protein
BN973_01494	CDO87143.1	0	0	171	alpha/beta hydrolase fold protein
BN973_01497	CDO87146.1	0	0	116	Rieske (2Fe-2S) domain-containing protein
BN973_01496	CDO87145.1	0	0	132	3-(2,3-dihydroxyphenyl)propionate dioxygenase
BN973_01499	CDO87148.1	0	0	134	serine/threonine-protein kinase transcriptional regulatory protein PknK_3
BN973_01498	CDO87147.1	0	0	133	NAD(P)H-nitrite reductase
BN973_03698	CDO89324.1	1	0	120	integral membrane protein
BN973_05028	CDO90630.1	0	0	140	integral membrane protein
BN973_05029	CDO90631.1	0	1	188	34 kDa antigenic protein
BN973_05024	CDO90626.1	0	0	140	von Willebrand factor type A
BN973_05025	CDO90627.1	0	0	136	magnesium chelatase
BN973_05026	CDO90628.1	1	0	134	bifunctional phosphoribosylaminoimidazolecarboxamide formyltransferase/IMP cyclohydrolase
BN973_05027	CDO90629.1	1	0	129	phosphoribosylglycinamide formyltransferase
BN973_05020	CDO90622.1	0	0	134	enoyl-CoA hydratase
BN973_05021	CDO90623.1	0	0	130	hypothetical protein
BN973_05022	CDO90624.1	0	0	140	condensation domain-containing protein
BN973_05023	CDO90625.1	0	0	91	Fatty acyl-AMP ligase FadD28 and polyketide synthase
BN973_03694	CDO89320.1	0	0	100	NmrA family protein
BN973_01832	CDO87478.1	0	0	159	hypothetical protein
BN973_04773	CDO90380.1	0	0	125	dioxygenase
BN973_04772	CDO90379.1	0	0	153	acyl-CoA dehydrogenase
BN973_04771	CDO90378.1	0	0	193	TetR family transcriptional regulator
BN973_04770	CDO90377.1	0	0	172	3-oxoadipate enol-lactonase
BN973_04777	CDO90384.1	0	0	151	succinate-semialdehyde dehydrogenase [NADP+] dependent, GabD1
BN973_04776	CDO90383.1	0	0	277	ferredoxin
BN973_04775	CDO90382.1	0	0	145	cytochrome P450
BN973_04774	CDO90381.1	0	0	157	putative acyl-CoA dehydrogenase
BN973_04779	CDO90386.1	0	0	120	acyl-CoA dehydrogenase
BN973_01834	CDO87480.1	0	0	116	Nodulation protein S (NodS)
BN973_00452	CDO86111.1	1	0	181	transcriptional regulator
BN973_00453	CDO86112.1	0	0	191	putative Na+-dependent transporter
BN973_00450	CDO86109.1	0	0	117	wyosine base formation
BN973_00451	CDO86110.1	0	0	157	putative integral membrane protein
BN973_00456	CDO86115.1	1	0	146	leucyl-tRNA synthetase
BN973_00457	CDO86116.1	0	0	177	short chain dehydrogenase
BN973_00454	CDO86113.1	0	0	176	transmembrane protein
BN973_00455	CDO86114.1	0	0	161	secreted proline rich protein Mtc28
BN973_00458	CDO86117.1	0	0	205	transcriptional regulatory protein
BN973_00459	CDO86118.1	0	0	206	ABC transporter ATP-binding protein
BN973_04517	CDO90124.1	0	0	203	base excision DNA repair protein, HhH-GPD family protein
BN973_04516	CDO90123.1	0	0	315	hypothetical protein
BN973_04515	CDO90122.1	0	0	136	hypothetical protein
BN973_04514	CDO90121.1	0	0	173	hypothetical ala-, pro-rich protein
BN973_04513	CDO90120.1	0	0	171	mannosyltransferase
BN973_04512	CDO90119.1	0	0	175	pterin-4-alpha-carbinolamine dehydratase
BN973_04511	CDO90118.1	0	0	134	cyclopropane-fatty-acyl-phospholipid synthase
BN973_04510	CDO90117.1	0	0	118	hypothetical protein
BN973_04519	CDO90126.1	0	1	147	hypothetical protein
BN973_04518	CDO90125.1	0	0	182	Putative lumazine-binding protein
BN973_05339	CDO90934.1	0	0	140	transcriptional regulatory protein
BN973_00128	CDO85795.1	0	0	125	aldehyde dehydrogenase
BN973_05449	CDO91043.1	0	0	173	carnitine operon protein CaiE
BN973_05330	CDO90925.1	0	0	168	SnoaL-like polyketide cyclase
BN973_00127	CDO85794.1	0	0	147	pyridoxamine 5'-phosphate oxidase-like protein
BN973_05332	CDO90927.1	0	0	112	TetR family transcriptional regulator
BN973_00125	CDO85792.1	0	0	155	oxidoreductase
BN973_05442	CDO91036.1	0	0	179	coenzyme F420-dependent oxidoreductase
BN973_00123	CDO85790.1	0	0	198	oxidoreductase
BN973_02328	CDO87970.1	0	0	171	FF domain-containing protein
BN973_02329	CDO87971.1	0	0	149	short chain dehydrogenase
BN973_05336	CDO90931.1	0	0	132	29 kDa antigen Cfp29
BN973_02322	CDO87964.1	0	0	151	protease
BN973_02323	CDO87965.1	0	0	116	oxidoreductase
BN973_02320	CDO87962.1	1	0	173	30S ribosomal protein S15
BN973_05441	CDO91035.1	0	0	151	Acetoacetate decarboxylase (ADC)
BN973_02326	CDO87968.1	0	0	155	AsnC family transcriptional regulator
BN973_02327	CDO87969.1	0	0	127	putative monooxygenase
BN973_02324	CDO87966.1	0	0	104	beta-lactamase class A
BN973_02325	CDO87967.1	1	0	150	secreted L-alanine dehydrogenase ALD
BN973_04319	CDO89929.1	1	0	120	ATP synthase, F1 subunit epsilon
BN973_04318	CDO89928.1	0	0	94	hypothetical protein
BN973_04315	NA	0	0	916	16S ribosomal RNA
BN973_04314	NA	0	0	3707	23S ribosomal RNA
BN973_04317	CDO89927.1	1	0	122	ATP:cob(I)alamin adenosyltransferase
BN973_04316	CDO89926.1	1	0	121	UDP-N-acetylglucosamine 1-carboxyvinyltransferase
BN973_04311	CDO89924.1	0	0	102	AraC family transcriptional regulator
BN973_04310	CDO89923.1	0	0	133	glyoxalase/bleomycin resistance protein/dioxygenase
BN973_04313	NA	0	0	131	5S ribosomal RNA
BN973_04312	CDO89925.1	0	0	77	methylated-DNA--protein-cysteine methyltransferase
BN973_01008	CDO86663.1	1	0	123	MerR family transcriptional regulator
BN973_01009	CDO86664.1	0	0	137	galactose mutarotase
BN973_01002	CDO86657.1	0	0	138	NAD-dependent aldehyde dehydrogenase
BN973_01003	CDO86658.1	0	0	162	LysR family transcriptional regulator
BN973_01000	CDO86655.1	0	0	152	putative MobA-like protein
BN973_01001	CDO86656.1	0	0	158	amidohydrolase 2
BN973_01006	CDO86661.1	0	0	136	molecular chaperone Hsp70
BN973_01007	CDO86662.1	1	0	103	molecular chaperone DnaJ
BN973_01004	CDO86659.1	0	0	148	sulfotransferase family protein
BN973_01005	CDO86660.1	1	0	456	molecular chaperone DnaK
BN973_02980	CDO88611.1	0	0	191	CalU12 protein
BN973_01268	CDO86921.1	0	0	144	NAD(P)H-dependent glycerol-3-phosphate dehydrogenase
BN973_01269	CDO86922.1	0	0	147	monooxygenase, flavin-binding family protein
BN973_01266	CDO86919.1	1	0	140	grcC1
BN973_01267	CDO86920.1	1	0	144	heat shock protein HtpX
BN973_01264	CDO86917.1	0	0	174	benzoquinone methyltransferase
BN973_01265	CDO86918.1	1	0	146	FAD dependent oxidoreductase, putative
BN973_01262	CDO86915.1	1	0	137	ubiquinone/menaquinone biosynthesis methyltransferase
BN973_01263	CDO86916.1	0	0	239	putative secreted protein
BN973_01260	CDO86913.1	0	0	89	glycosyl transferase
BN973_01261	CDO86914.1	0	0	167	short chain dehydrogenase
BN973_05323	CDO90918.1	1	0	151	amidophosphoribosyltransferase
BN973_00209	CDO85875.1	1	0	120	cytidine/deoxycytidylate deaminase
BN973_00208	NA	0	0	176	tRNA-Ser
BN973_00207	CDO85874.1	0	0	214	MCE family lipoprotein
BN973_00206	CDO85873.1	0	0	150	esterase EstC
BN973_00205	CDO85872.1	0	0	206	TetR family transcriptional regulator
BN973_00204	CDO85871.1	0	0	189	diguanylate cyclase
BN973_00203	CDO85870.1	0	0	234	ERG2 and Sigma1 receptor like protein
BN973_00202	CDO85869.1	0	0	127	TetR family transcriptional regulator
BN973_00201	CDO85868.1	0	0	149	short-chain dehydrogenase
BN973_00200	CDO85867.1	0	0	121	putative PhzA/B-like protein
BN973_04188	CDO89803.1	0	0	162	rieske (2Fe-2S) domain-containing protein
BN973_04189	CDO89804.1	0	1	139	putative secreted hydrolase
BN973_04180	CDO89795.1	0	0	121	sulfate/thiosulfate import ATP-binding protein CysA
BN973_04181	CDO89796.1	0	0	130	membrane protein
BN973_04182	CDO89797.1	1	0	177	bacterioferritin comigratory protein Bcp
BN973_04183	CDO89798.1	0	0	192	cytochrome P450 superfamily protein
BN973_04184	CDO89799.1	0	0	139	acetylornithine deacetylase/succinyldiaminopimelate desuccinylase-like deacylase
BN973_04185	CDO89800.1	1	0	121	holo-ACP synthase
BN973_04186	CDO89801.1	1	0	130	fatty acid synthase Fas
BN973_04187	CDO89802.1	0	0	239	secreted protein
BN973_01918	CDO87564.1	0	0	110	ATPase
BN973_01919	CDO87565.1	0	0	141	putative PEP-CTERM system TPR-repeat lipoprotein
BN973_01910	CDO87556.1	0	0	126	fprA
BN973_01911	CDO87557.1	1	0	136	peptide chain release factor 2
BN973_01912	CDO87558.1	0	0	176	transporter, small conductance mechanosensitive ion channel (MscS) family protein
BN973_01913	CDO87559.1	0	0	163	hypothetical proline rich protein
BN973_01914	CDO87560.1	1	0	137	cell division ATP-binding protein FtsE
BN973_01915	CDO87561.1	0	0	116	cell division protein FtsX
BN973_01916	CDO87562.1	1	0	171	SsrA-binding protein
BN973_01917	CDO87563.1	0	1	145	integral membrane protein
BN973_05580	CDO91173.1	0	0	110	conjugative transfer protein TrbB
BN973_04232	CDO89846.1	0	1	118	prolyl oligopeptidase family protein
BN973_03513	CDO89142.1	0	0	128	cytochrome P450
BN973_04230	CDO89844.1	0	0	107	oxidoreductase
BN973_04231	CDO89845.1	0	0	159	SnoaL-like polyketide cyclase
BN973_04236	CDO89850.1	0	0	129	nicotinamidase-like amidase
BN973_04237	CDO89851.1	0	0	167	thioesterase
BN973_04234	CDO89848.1	0	0	194	bile-acid 7-alpha dehydratase
BN973_04235	CDO89849.1	0	0	185	rieske (2Fe-2S) domain-containing protein
BN973_03518	CDO89147.1	0	0	153	erythronolide synthase, modules 3 and 4
BN973_04239	CDO89853.1	0	0	88	short chain dehydrogenase/reductase family oxidoreductase
BN973_02177	CDO87819.1	1	0	157	phosphopantetheine adenylyltransferase
BN973_02176	CDO87818.1	0	0	180	methyltransferase
BN973_02175	CDO87817.1	0	0	121	pyruvate carboxylase
BN973_02174	CDO87816.1	1	0	160	putative integral membrane protein
BN973_02173	CDO87815.1	0	0	137	membrane or hypothetical protein
BN973_02172	CDO87814.1	0	0	126	alpha/beta hydrolase
BN973_02171	CDO87813.1	0	0	174	aldo/keto reductase, diketogulonate reductase
BN973_02170	CDO87812.1	0	0	151	2,5-diketo-D-gluconic acid reductase A
BN973_02179	CDO87821.1	0	0	174	Polyketide biosynthesis protein PksE
BN973_02665	CDO88301.1	1	0	153	OXPP cycle protein OPCA
BN973_04646	CDO90253.1	0	0	159	dehydrogenase
BN973_05006	CDO90608.1	0	0	120	5-formyltetrahydrofolate cyclo-ligase
BN973_05007	CDO90609.1	0	0	273	hypothetical protein
BN973_05004	CDO90606.1	1	0	163	molybdopterin biosynthesis protein MoeA1
BN973_05005	CDO90607.1	1	0	193	UDP-glucose pyrophosphorylase
BN973_05002	CDO90604.1	0	0	165	transmembrane protein
BN973_05003	CDO90605.1	1	0	144	ribosomal protein alanine acetyltransferase rimJ
BN973_05000	CDO90603.1	0	0	194	cytochrome P450 superfamily protein
BN973_05001	NA	0	0	179	tRNA-Ala
BN973_05008	CDO90610.1	0	1	186	flagellar basal body P-ring biosynthesis protein
BN973_05009	CDO90611.1	0	0	177	large-conductance mechanosensitive channel
BN973_04765	CDO90372.1	0	0	138	enoyl-CoA hydratase/isomerase
BN973_04755	CDO90362.1	0	0	196	transcriptional regulator
BN973_04754	CDO90361.1	0	0	149	peroxisomal hydratase-dehydrogenase-epimerase
BN973_04757	CDO90364.1	0	0	154	putative nucleic-acid-binding protein containing a Zn-ribbon
BN973_04756	CDO90363.1	0	0	134	acetyl-CoA acetyltransferase
BN973_04751	CDO90358.1	0	0	143	luciferase family protein
BN973_04750	CDO90357.1	0	0	118	hypothetical protein
BN973_04753	CDO90360.1	0	0	141	acyl-CoA ligase
BN973_04752	CDO90359.1	0	0	155	TetR family transcriptional regulator
BN973_04759	CDO90366.1	0	0	143	hypothetical protein
BN973_04758	CDO90365.1	0	0	94	acetyl-CoA acetyltransferase
BN973_00434	CDO86093.1	0	0	141	transcriptional regulator
BN973_00435	CDO86094.1	0	0	119	NLP/P60 family protein
BN973_00436	CDO86095.1	0	0	112	Biofilm regulator BssS
BN973_00437	CDO86096.1	0	0	173	Biofilm regulator BssS
BN973_00430	CDO86089.1	0	0	200	acetyltransferase
BN973_00431	CDO86090.1	0	0	168	Pirin-like protein
BN973_00432	CDO86091.1	0	0	136	acyl-CoA dehydrogenase
BN973_00433	CDO86092.1	0	0	85	transcriptional regulatory protein (Whib-like), WhiB5
BN973_00438	CDO86097.1	0	0	170	hypothetical protein
BN973_00439	CDO86098.1	0	0	111	hypothetical protein
BN973_04539	CDO90146.1	0	0	111	acyl-CoA dehydrogenase
BN973_04538	CDO90145.1	0	0	162	acetyl-CoA acetyltransferase
BN973_04531	CDO90138.1	0	0	150	putative nucleoside-diphosphate sugar epimerase
BN973_04530	CDO90137.1	0	0	128	caax amino protease
BN973_04533	CDO90140.1	0	0	81	isoprenylcysteine carboxyl methyltransferase (icmt) family protein
BN973_04532	CDO90139.1	0	0	128	transferase
BN973_04535	CDO90142.1	0	0	130	enoyl-CoA hydratase, EchA1
BN973_04534	CDO90141.1	0	0	128	oxidoreductase
BN973_04537	CDO90144.1	0	0	219	TetR family transcriptional regulator
BN973_04536	CDO90143.1	0	0	150	acetyl-CoA acetyltransferase
BN973_01094	CDO86748.1	0	0	192	hypothetical protein
BN973_03169	CDO88799.1	0	0	160	urease subunit alpha
BN973_03168	CDO88798.1	0	0	170	urease subunit beta
BN973_03163	CDO88793.1	1	0	171	6-phosphogluconate dehydrogenase
BN973_03162	CDO88792.1	1	0	162	inosine 5-monophosphate dehydrogenase
BN973_03161	CDO88791.1	0	0	118	CBS domain-containing protein
BN973_01092	CDO86747.1	0	0	159	thiamine biosynthesis protein ThiC
BN973_03167	CDO88797.1	0	0	205	urease subunit gamma
BN973_03166	CDO88796.1	0	0	134	thioesterase superfamily protein
BN973_03165	CDO88795.1	1	0	219	CopY family transcriptional regulator
BN973_03164	CDO88794.1	1	0	124	putative transmembrane protein
BN973_02348	CDO87990.1	0	0	97	acyl-CoA dehydrogenase FadE18
BN973_02349	CDO87991.1	0	0	94	glycosyltransferase GtfE
BN973_02344	CDO87986.1	0	0	126	putative acyl-CoA dehydrogenase
BN973_02345	CDO87987.1	0	0	107	bifunctional protein acetyl-/propionyl-coenzyme A carboxylase alpha chain AccA3
BN973_02346	CDO87988.1	0	0	136	3-ketoacyl-ACP reductase
BN973_02347	CDO87989.1	0	0	101	acyl-CoA dehydrogenase FadE34
BN973_02340	CDO87982.1	0	0	113	Latex clearing protein precursor
BN973_02341	CDO87983.1	0	0	152	aminoglycoside phosphotransferase
BN973_02342	CDO87984.1	0	0	147	membrane-anchored adenylyl cyclase
BN973_02343	CDO87985.1	0	1	137	hypothetical protein
BN973_04507	CDO90114.1	0	0	126	nitrate reductase subunit alpha
BN973_05136	CDO90736.1	0	0	259	hypothetical protein
BN973_05137	CDO90737.1	0	0	124	DNA-binding protein
BN973_05134	CDO90734.1	0	0	164	molybdenum cofactor synthesis domain-containing protein
BN973_05135	CDO90735.1	0	0	189	molybdenum cofactor biosynthesis protein MoaC
BN973_05132	CDO90732.1	0	0	177	resuscitation-promoting factor RpfA
BN973_05133	CDO90733.1	0	0	114	moaE2
BN973_00946	CDO86602.1	0	0	152	hypothetical protein
BN973_01147	CDO86800.1	0	0	265	hypothetical protein
BN973_01146	CDO86799.1	0	0	135	hypothetical protein
BN973_01413	CDO87062.1	0	0	145	type IIA topoisomerase (DNA gyrase/topo II, topoisomerase IV), A subunit
BN973_03512	CDO89141.1	0	0	140	cytochrome P450
BN973_01412	CDO87061.1	0	0	104	D-xylulose kinase
BN973_04233	CDO89847.1	0	0	142	steroid monooxygenase
BN973_01415	CDO87064.1	0	0	177	methyltransferase, putative, family protein
BN973_03510	CDO89139.1	0	0	124	hypothetical protein
BN973_01414	CDO87063.1	0	0	122	O-methyltransferase
BN973_03511	CDO89140.1	0	0	199	3-oxoacyl-ACP reductase
BN973_01417	CDO87066.1	1	0	184	preprotein translocase subunit SecY
BN973_03516	CDO89145.1	0	0	140	UDP-glucose 4-epimerase GalE4
BN973_01416	CDO87065.1	0	0	166	methyltransferase, putative, family protein
BN973_03517	CDO89146.1	0	0	157	erythronolide synthase, modules 3 and 4
BN973_03514	CDO89143.1	0	0	142	hypothetical protein
BN973_03515	CDO89144.1	0	0	219	ERG2 and Sigma1 receptor like protein
BN973_04238	CDO89852.1	0	0	114	acyl-CoA synthetase
BN973_03519	CDO89148.1	0	0	147	erythronolide synthase, modules 3 and 4
BN973_01068	CDO86723.1	1	0	154	glutamine-binding protein
BN973_01069	CDO86724.1	0	0	183	hypothetical protein
BN973_01064	CDO86719.1	0	0	139	phosphate acetyltransferase
BN973_01065	CDO86720.1	0	0	156	acetate kinase
BN973_01066	CDO86721.1	0	0	120	hypothetical protein
BN973_01067	CDO86722.1	1	0	161	serine/threonine protein kinase
BN973_01060	CDO86715.1	0	0	141	FMNH2-utilizing oxygenase
BN973_01061	CDO86716.1	0	0	205	putative integral membrane protein
BN973_01062	CDO86717.1	0	0	151	metallo-beta-lactamase
BN973_01063	CDO86718.1	1	0	192	glucose-6-phosphate dehydrogenase (coenzyme-F420)
BN973_05458	CDO91052.1	0	0	168	4-hydroxy-2-ketovalerate aldolase
BN973_01280	CDO86932.1	0	1	162	cytochrome P450 superfamily protein
BN973_01281	CDO86933.1	0	0	180	adenylate cyclase
BN973_01282	CDO86934.1	0	0	130	cytochrome P450
BN973_01283	CDO86935.1	0	0	173	putative short chain dehydrogenase/reductase
BN973_01284	CDO86936.1	0	0	124	integral membrane protein, YccS/YhfK family
BN973_01285	CDO86937.1	0	0	172	galactose-1-phosphate uridylyltransferase
BN973_01286	CDO86938.1	0	0	109	galactokinase
BN973_01287	CDO86939.1	0	0	116	hypothetical protein
BN973_01288	CDO86940.1	0	0	173	hypothetical protein
BN973_01289	CDO86941.1	0	0	168	integral membrane protein
BN973_00221	CDO85887.1	0	0	139	hypothetical protein
BN973_00220	CDO85886.1	0	0	163	hypothetical protein
BN973_00223	CDO85889.1	0	0	113	phosphotransferase enzyme family protein
BN973_00222	CDO85888.1	0	0	148	thiopurine S-methyltransferase (tpmt) superfamily protein
BN973_00889	CDO86545.1	0	0	119	putative transcriptional regulator
BN973_00888	CDO86544.1	0	0	104	PEP phosphonomutase
BN973_00227	CDO85893.1	0	0	139	alcohol dehydrogenase, zinc-binding
BN973_00226	CDO85892.1	0	0	170	TetR family transcriptional regulator
BN973_00885	CDO86541.1	0	0	180	succinate dehydrogenase flavoprotein subunit
BN973_00884	CDO86540.1	0	0	156	fumarate reductase iron-sulfur subunit
BN973_00887	CDO86543.1	0	0	285	hypothetical protein
BN973_00886	CDO86542.1	0	0	177	integral membrane protein
BN973_00881	CDO86537.1	1	0	188	acyl-CoA dehydrogenase
BN973_00880	CDO86536.1	1	0	148	acetyl-CoA acetyltransferase
BN973_00883	CDO86539.1	1	0	125	NADH-FMN oxidoreductase
BN973_00882	CDO86538.1	0	0	132	oxidoreductase, 2OG-Fe(II) oxygenase family protein
BN973_03750	CDO89374.1	0	0	129	TetR family transcriptional regulator
BN973_03751	CDO89375.1	0	0	128	flavoprotein
BN973_03752	CDO89376.1	0	0	123	diacylglycerol kinase
BN973_03753	CDO89377.1	0	0	145	secreted protein
BN973_03754	CDO89378.1	0	0	165	hypothetical protein
BN973_03755	CDO89379.1	0	0	110	beta-lactamase
BN973_03756	CDO89380.1	0	0	146	transcriptional regulator
BN973_03757	CDO89381.1	0	0	161	AdhE2
BN973_03758	CDO89382.1	0	0	189	metallo-beta-lactamase
BN973_03759	CDO89383.1	0	0	136	hypothetical protein
BN973_01932	CDO87577.1	0	0	137	flavoprotein disulfide reductase
BN973_01933	CDO87578.1	0	0	138	FAD-dependent pyridine nucleotide-disulfide oxidoreductase
BN973_01930	CDO87575.1	0	0	170	cytochrome C oxidase subunit I
BN973_01931	CDO87576.1	0	0	135	hypothetical protein
BN973_01936	CDO87581.1	0	0	160	hypothetical protein
BN973_01937	CDO87582.1	0	0	118	dimethylmenaquinone methyltransferase
BN973_01934	CDO87579.1	0	0	125	oxidoreductase, molybdopterin binding protein
BN973_01935	CDO87580.1	0	0	114	oxidoreductase FAD-binding region
BN973_01938	CDO87583.1	0	0	111	endoribonuclease L-psp family protein
BN973_01939	CDO87584.1	0	0	95	hypothetical protein
BN973_00085	CDO85754.1	1	0	170	aspartate-semialdehyde dehydrogenase
BN973_00084	CDO85753.1	0	0	154	hypothetical protein
BN973_00087	CDO85756.1	1	0	150	2-isopropylmalate synthase
BN973_00086	CDO85755.1	1	0	157	aspartokinase
BN973_00081	CDO85750.1	0	0	182	PPE family protein
BN973_00080	CDO85749.1	0	0	184	PPE family protein
BN973_00083	CDO85752.1	0	0	187	Maf-like protein
BN973_00082	CDO85751.1	0	0	172	hypothetical protein
BN973_00089	CDO85758.1	0	0	117	ligase
BN973_00088	CDO85757.1	0	0	128	DNA polymerase III subunit epsilon
BN973_04254	CDO89868.1	0	0	128	oxidoreductase, short chain dehydrogenase/reductase
BN973_04255	CDO89869.1	0	0	87	TetR family transcriptional regulator
BN973_03576	CDO89204.1	0	0	173	hypothetical protein
BN973_04257	CDO89871.1	0	0	173	hypothetical protein
BN973_03570	CDO89198.1	1	0	207	ubiquitin-like protein Pup
BN973_04251	CDO89865.1	0	0	151	hypothetical protein
BN973_04252	CDO89866.1	0	0	220	CsbD family protein
BN973_04253	CDO89867.1	0	0	153	dihydrodipicolinate synthetase
BN973_04258	CDO89872.1	0	0	136	EchA10
BN973_04259	CDO89873.1	0	0	117	enoyl-CoA hydratase/isomerase
BN973_05541	CDO91135.1	0	0	135	dihydropteroate synthase
BN973_02487	CDO88123.1	0	0	149	transmembrane protein DEDA
BN973_02486	CDO88122.1	0	0	206	TetR family transcriptional regulator
BN973_02485	CDO88121.1	0	0	347	anti-anti-sigma factor
BN973_02484	CDO88120.1	0	0	139	integral membrane protein
BN973_02483	CDO88119.1	0	0	138	catalase
BN973_02482	CDO88118.1	0	0	165	NAD dependent epimerase/dehydratase
BN973_02481	CDO88117.1	0	0	121	transcriptional regulator
BN973_02480	CDO88116.1	0	0	119	hypothetical protein
BN973_02489	CDO88125.1	0	0	130	fatty-acid--CoA ligase
BN973_02488	CDO88124.1	0	0	131	G-D-S-L family lipolytic protein
BN973_03288	CDO88918.1	0	0	133	short-chain type dehydrogenase/reductase
BN973_03289	CDO88919.1	0	0	143	TetR family transcriptional regulator
BN973_03282	CDO88912.1	0	0	158	acyl-CoA dehydrogenase
BN973_03283	CDO88913.1	0	0	181	enoyl-CoA hydratase
BN973_03280	CDO88910.1	0	0	126	AMP-dependent synthetase and ligase
BN973_03281	CDO88911.1	0	0	114	acyl-CoA dehydrogenase
BN973_03286	CDO88916.1	0	0	140	epoxide hydrolase
BN973_03287	CDO88917.1	0	0	117	riboflavin biosynthesis protein RibA
BN973_03284	CDO88914.1	0	0	136	oxygenase
BN973_03285	CDO88915.1	0	0	151	oxygenase
BN973_02159	CDO87801.1	1	0	194	uracil-DNA glycosylase
BN973_02158	CDO87800.1	0	0	132	thiamine monophosphate kinase
BN973_02629	CDO88265.1	0	0	168	membrane protein
BN973_02628	CDO88264.1	0	0	124	lipI
BN973_02623	CDO88259.1	1	0	339	S-adenosylmethionine synthetase
BN973_02622	CDO88258.1	1	0	144	bifunctional phosphopantothenoylcysteine decarboxylase/phosphopantothenate synthase
BN973_02621	CDO88257.1	1	0	286	DNA-directed RNA polymerase subunit omega
BN973_02152	CDO87794.1	0	0	136	hydrolase, NUDIX family protein
BN973_02627	CDO88263.1	0	0	138	lipase
BN973_02626	CDO88262.1	0	0	159	lipolytic protein
BN973_02625	CDO88261.1	0	0	152	signal transduction histidine kinase, nitrogen specific
BN973_02624	CDO88260.1	0	0	116	short-chain dehydrogenase/reductase SDR
BN973_03452	CDO89081.1	0	0	145	pyrazinamidase/nicotinamidas
BN973_04574	CDO90181.1	0	0	135	luciferase family protein
BN973_01441	CDO87090.1	1	0	164	dTDP-glucose 4,6-dehydratase RMLB
BN973_05288	CDO90888.1	0	0	145	transcriptional regulator
BN973_05289	CDO90889.1	0	0	200	hypothetical protein
BN973_05284	CDO90884.1	0	0	178	short chain dehydrogenase
BN973_05285	CDO90885.1	0	0	160	methyltransferase-UbiE family protein
BN973_05286	CDO90886.1	0	0	144	D-alanyl-D-alanine dipeptidase
BN973_05287	CDO90887.1	0	0	119	6-hydroxy-D-nicotine oxidase
BN973_05280	CDO90880.1	0	0	134	caib/baif family protein
BN973_05281	CDO90881.1	0	0	114	luciferase family protein
BN973_05282	CDO90882.1	0	0	154	methylmalonyl-CoA mutase
BN973_05283	CDO90883.1	0	0	144	hypothetical protein
BN973_04889	CDO90494.1	0	0	136	hypothetical protein
BN973_03945	CDO89566.1	0	0	164	SCP-like extracellular protein
BN973_04739	CDO90346.1	0	0	197	3-alpha-hydroxysteroid dehydrogenase
BN973_04664	CDO90271.1	0	0	155	phosphotransferase enzyme family protein
BN973_04737	CDO90344.1	0	0	210	ferredoxin reductase
BN973_04736	CDO90343.1	0	0	131	putative dehydrogenase
BN973_04735	CDO90342.1	0	0	136	epocide hydrolase domain-containing protein
BN973_04734	CDO90341.1	0	0	159	pyruvate phosphate dikinase
BN973_04733	CDO90340.1	0	0	142	hypothetical protein
BN973_04732	CDO90339.1	0	0	136	acyl-CoA dehydrogenase
BN973_04731	CDO90338.1	0	0	116	hypothetical protein
BN973_04730	CDO90337.1	0	0	138	PEP-utilizing protein
BN973_01549	CDO87198.1	0	0	139	amino acid adenylation domain-containing protein
BN973_01548	CDO87197.1	0	0	139	alpha-ketoglutarate-dependent taurine dioxygenase
BN973_01543	CDO87192.1	0	0	184	hypothetical alanine and proline rich protein
BN973_01542	CDO87191.1	0	0	260	RNA polymerase sigma factor SigD
BN973_01541	CDO87190.1	0	0	102	putative ATPase
BN973_01540	CDO87189.1	1	0	128	transcriptional regulator
BN973_01547	CDO87196.1	1	0	133	FAD dependent oxidoreductase
BN973_01546	CDO87195.1	1	0	133	inosine 5-monophosphate dehydrogenase
BN973_01545	CDO87194.1	1	0	219	inosine 5'-monophosphate dehydrogenase
BN973_01544	CDO87193.1	1	0	256	hypothetical protein
BN973_00148	CDO85815.1	0	0	209	cytochrome P450
BN973_00149	CDO85816.1	0	0	170	hypothetical protein
BN973_04663	CDO90270.1	0	0	120	protoporphyrinogen oxidase
BN973_00418	CDO86078.1	0	0	109	membrane associated protein
BN973_00419	CDO86079.1	1	0	145	para-aminobenzoate synthase component II
BN973_00140	CDO85807.1	0	0	107	short chain dehydrogenase
BN973_00141	CDO85808.1	0	0	102	lysA_1
BN973_00142	CDO85809.1	0	0	164	transmembrane protein
BN973_00143	CDO85810.1	0	0	136	hypothetical protein
BN973_00144	CDO85811.1	0	0	183	hypothetical protein
BN973_00145	CDO85812.1	0	0	160	DNA polymerase LigD polymerase subunit
BN973_00410	NA	0	0	367	tRNA-Ile
BN973_00411	NA	0	0	213	tRNA-Ala
BN973_00544	CDO86203.1	0	0	164	F420-dependent methylene-tetrahydromethanopterin reductase
BN973_01359	CDO87008.1	0	0	182	mycofactocin system RPExFGAL protein
BN973_00545	CDO86204.1	0	0	134	lipase
BN973_05242	CDO90842.1	0	0	148	peptidase, M24 family protein
BN973_04081	CDO89701.1	0	0	122	kinase, pfkB family protein
BN973_04080	CDO89700.1	0	1	133	adenylate and guanylate cyclase catalytic domain-containing protein
BN973_04083	CDO89703.1	0	0	147	GntR family transcriptional regulator
BN973_04082	CDO89702.1	0	0	96	putative protein-S-isoprenylcysteine methyltransferase
BN973_04085	CDO89705.1	0	0	119	hypothetical protein
BN973_04084	CDO89704.1	0	0	126	phosphatidylethanolamine-binding protein
BN973_04087	CDO89707.1	0	0	213	thioesterase
BN973_04086	CDO89706.1	0	0	116	carboxyvinyl-carboxyphosphonate phosphorylmutase
BN973_04089	CDO89709.1	0	0	122	hypothetical protein
BN973_04088	CDO89708.1	0	0	118	hypothetical protein
BN973_00541	CDO86200.1	0	0	125	hypothetical protein
BN973_00542	CDO86201.1	0	1	125	putative F420-dependent oxidoreductase, family
BN973_00543	CDO86202.1	0	0	156	NUDIX hydrolase
BN973_04959	CDO90562.1	1	0	151	methionyl-tRNA synthetase
BN973_04049	CDO89669.1	0	0	160	hypothetical protein
BN973_04958	CDO90561.1	1	0	182	TatD family hydrolase
BN973_04048	CDO89668.1	0	0	160	ESX-1 secretion-associated protein EspH
BN973_02178	CDO87820.1	0	0	350	13e12 repeat-containing protein
BN973_03019	CDO88650.1	0	0	156	TetR family transcriptional regulator
BN973_04046	CDO89666.1	0	0	100	ESX-1 secretion-associated protein EspK
BN973_03149	CDO88779.1	1	0	180	regulatory protein
BN973_03148	CDO88778.1	1	0	195	hypothetical protein
BN973_03145	CDO88775.1	0	0	153	glycine cleavage system protein H
BN973_03144	CDO88774.1	0	0	156	hypothetical protein
BN973_03147	CDO88777.1	1	0	151	putative regulatory protein
BN973_03146	CDO88776.1	1	0	200	garA protein
BN973_03141	CDO88771.1	0	0	99	CDP-alcohol phosphatidyltransferase
BN973_03140	CDO88770.1	1	0	134	preprotein translocase subunit SecA
BN973_03143	CDO88773.1	0	0	184	small basic protein
BN973_03142	CDO88772.1	0	0	138	membrane associated protein
BN973_01689	CDO87336.1	0	0	162	hypothetical protein
BN973_02366	CDO88008.1	0	0	106	antibiotic biosynthesis monooxygenase domain-containing protein
BN973_02367	CDO88009.1	1	0	171	cell division transmembrane protein FtsK
BN973_02364	CDO88006.1	0	0	102	methyltransferase, putative, family protein
BN973_02365	CDO88007.1	0	0	107	3-ketoacyl-(acyl-carrier-protein) reductase
BN973_02362	CDO88004.1	0	0	119	hypothetical alanine and glycine rich protein
BN973_02363	CDO88005.1	0	0	106	hypothetical protein
BN973_02360	CDO88002.1	0	0	146	hydrolase
BN973_02361	CDO88003.1	0	0	158	DNA-binding protein, YbaB/EbfC family
BN973_02818	CDO88453.1	0	0	163	TM2 domain-containing protein
BN973_02819	CDO88454.1	0	0	172	hypothetical protein
BN973_02368	CDO88010.1	1	0	145	transferase
BN973_02369	CDO88011.1	0	0	229	CDP-diacylglycerol--glycerol-3-phosphate 3-phosphatidyltransferase
BN973_03497	CDO89126.1	0	0	215	hypothetical protein
BN973_03496	CDO89125.1	0	0	142	hypothetical protein
BN973_03495	CDO89124.1	0	0	128	cytochrome P450
BN973_03494	CDO89123.1	0	0	156	short-chain dehydrogenase
BN973_03493	CDO89122.1	0	0	101	cytochrome P450
BN973_04444	CDO90053.1	1	0	149	methyltransferase
BN973_03491	CDO89120.1	0	0	195	TetR family transcriptional regulator
BN973_04446	CDO90055.1	0	0	106	ABC transporter ATP-binding protein
BN973_01046	CDO86701.1	0	0	117	signal transduction histidine kinase
BN973_01047	CDO86702.1	0	0	145	O-methyltransferase
BN973_01044	CDO86699.1	0	0	130	EmrB efflux protein
BN973_01045	CDO86700.1	0	0	177	two-component system response regulator
BN973_01042	CDO86697.1	0	0	118	O-succinylhomoserine sulfhydrylase
BN973_01043	CDO86698.1	0	0	139	NADH dehydrogenase
BN973_01040	CDO86695.1	0	0	111	phosphoribosylglycinamide formyltransferase 2
BN973_01041	CDO86696.1	0	0	125	rhodanese domain-containing protein
BN973_01738	CDO87385.1	0	0	151	ESX-1 secretion-associated protein EspK
BN973_01739	CDO87386.1	0	0	112	hypothetical protein
BN973_01048	CDO86703.1	0	0	145	type 2 lantibiotic biosynthesis protein LanM
BN973_01049	CDO86704.1	0	0	185	hypothetical protein
BN973_01954	CDO87599.1	0	0	117	oxidoreductase
BN973_01955	CDO87600.1	0	0	119	oxidoreductase YdbC
BN973_01956	CDO87601.1	0	0	174	endoribonuclease L-PSP
BN973_01957	CDO87602.1	0	0	196	hypothetical protein
BN973_01950	CDO87595.1	0	0	105	hypothetical protein
BN973_01951	CDO87596.1	0	0	115	zinc-binding oxidoreductase
BN973_01952	CDO87597.1	0	0	132	cupin
BN973_01953	CDO87598.1	0	0	119	oxidoreductase
BN973_01958	CDO87603.1	0	0	140	transmembrane efflux pump
BN973_01959	CDO87604.1	0	1	189	membrane protein MmpS1
BN973_05568	CDO91161.1	1	0	144	DNA polymerase III subunit delta'
BN973_03778	CDO89402.1	0	0	103	acyl-CoA dehydrogenase domain-containing protein
BN973_03779	CDO89403.1	0	0	155	TetR family transcriptional regulator
BN973_03772	CDO89396.1	0	0	138	haloacid dehalogenase, type II
BN973_03773	CDO89397.1	0	0	71	transmembrane protein
BN973_03770	CDO89394.1	0	0	158	putative aminoglycoside phosphotransferase
BN973_03771	CDO89395.1	0	0	108	putative ester cyclase
BN973_03776	CDO89400.1	0	1	122	N-acetylmuramoyl-L-alanine amidase
BN973_03777	CDO89401.1	0	0	188	cutinase Cut1
BN973_03774	CDO89398.1	0	0	117	transmembrane protein
BN973_03775	CDO89399.1	0	0	144	bifunctional transmembrane phospholipid biosynthesis enzyme PlsC
BN973_00609	CDO86267.1	0	0	144	hypothetical protein
BN973_00608	CDO86266.1	0	0	117	MarR family transcriptional regulator
BN973_00603	CDO86261.1	0	0	108	NAD dependent epimerase/dehydratase family protein
BN973_00602	CDO86260.1	0	0	158	acyl-CoA synthetase
BN973_00601	CDO86259.1	0	0	191	PadR family transcriptional regulator
BN973_00600	CDO86258.1	0	1	175	putative nucleic-acid-binding protein containing a Zn-ribbon
BN973_00607	CDO86265.1	0	0	116	LpqP protein
BN973_00606	CDO86264.1	0	0	127	TetR family transcriptional regulator
BN973_00605	CDO86263.1	0	0	139	alpha/beta hydrolase
BN973_00604	CDO86262.1	0	0	106	alpha/beta hydrolase fold family hydrolase
BN973_03808	CDO89432.1	0	0	150	Na+/H+ antiporter
BN973_03809	CDO89433.1	0	0	133	ATPase
BN973_04278	NA	0	0	191	tRNA-Leu
BN973_04279	CDO89892.1	0	1	178	acetyltransferase
BN973_03556	CDO89184.1	0	0	196	hypothetical protein
BN973_03557	CDO89185.1	0	0	130	putative transmembrane protein
BN973_03554	CDO89182.1	0	0	161	hypothetical protein
BN973_03555	CDO89183.1	0	0	125	alanine and proline rich membrane protein
BN973_03804	CDO89428.1	0	0	145	hypothetical protein
BN973_03805	CDO89429.1	0	0	171	putative secreted protein
BN973_03550	CDO89178.1	0	0	235	hypothetical protein
BN973_03807	CDO89431.1	0	0	145	hypothetical protein
BN973_02609	CDO88245.1	0	0	124	transporter
BN973_02608	CDO88244.1	0	0	120	chitinase/cellulase
BN973_02605	CDO88241.1	0	0	128	beta-lactamase
BN973_02604	CDO88240.1	0	1	145	acetyltransferase, gnat family protein
BN973_02607	CDO88243.1	0	1	113	hypothetical protein
BN973_02606	CDO88242.1	0	1	124	hypothetical protein
BN973_02601	CDO88237.1	0	0	133	ABC transporter ATP-binding protein
BN973_02600	CDO88236.1	0	0	164	ABC transporter permease
BN973_02603	CDO88239.1	0	0	118	membrane-anchored adenylyl cyclase
BN973_02602	CDO88238.1	0	0	127	putative oxidoreductase/HEAT repeat-containing protein
BN973_05452	CDO91046.1	0	0	149	TetR family transcriptional regulator
BN973_01389	CDO87038.1	1	0	277	50S ribosomal protein L24
BN973_01388	CDO87037.1	1	0	214	50S ribosomal protein L14
BN973_01381	CDO87030.1	0	0	138	transmembrane protein
BN973_01380	CDO87029.1	0	0	109	putative lipoprotein LpqN
BN973_01383	CDO87032.1	0	0	154	transmembrane protein
BN973_01382	CDO87031.1	0	1	128	phosphate ABC transporter phosphate-binding protein PstS
BN973_01385	CDO87034.1	0	0	122	transmembrane protein
BN973_01384	CDO87033.1	0	0	130	sulfatase-modifying factor 1
BN973_01387	CDO87036.1	0	0	171	13e12 repeat-containing protein
BN973_01386	CDO87035.1	0	0	810	integrase catalytic subunit
BN973_00388	CDO86050.1	1	0	104	ADP-ribose pyrophosphatase
BN973_00389	CDO86051.1	0	0	150	hypothetical protein
BN973_00386	CDO86048.1	0	0	104	hypothetical protein
BN973_00387	CDO86049.1	1	0	142	tRNA adenylyltransferase
BN973_00384	CDO86046.1	0	0	190	ESAT-6 like protein ESXC
BN973_00385	CDO86047.1	0	0	268	ESAT-6 like protein EsxD
BN973_00382	CDO86044.1	0	0	156	chromosome partitioning ATPase
BN973_00383	CDO86045.1	0	0	159	hypothetical protein
BN973_00380	CDO86042.1	0	0	87	hypothetical protein
BN973_00381	CDO86043.1	0	0	145	SX-2 secretion system protein eccD2
BN973_04711	CDO90318.1	0	0	151	hypothetical protein
BN973_04710	CDO90317.1	0	0	107	sulfotransferase family protein
BN973_04713	CDO90320.1	0	0	121	PEP-utilizing protein
BN973_04860	CDO90466.1	0	0	196	PPE family protein
BN973_04715	CDO90322.1	0	0	177	TetR family transcriptional regulator
BN973_04714	CDO90321.1	0	0	151	luciferase family protein
BN973_04717	CDO90324.1	0	0	221	hypothetical protein
BN973_04716	CDO90323.1	0	0	184	hypothetical protein
BN973_04719	CDO90326.1	0	0	144	hypothetical protein
BN973_04718	CDO90325.1	0	0	156	heme/copper-type cytochrome/quinol oxidase, subunit 3
BN973_04869	CDO90475.1	0	0	166	hypothetical protein
BN973_04868	CDO90474.1	0	0	144	dienelactone hydrolase
BN973_01569	CDO87218.1	0	0	129	error-prone DNA polymerase
BN973_01568	CDO87217.1	0	0	126	putative diacylglycerol O-acyltransferase
BN973_01565	CDO87214.1	0	0	155	lpqD
BN973_01564	CDO87213.1	0	0	142	short chain dehydrogenase
BN973_01567	CDO87216.1	0	0	111	trehalose 6-phosphate phosphatase
BN973_01566	CDO87215.1	0	0	132	MaoC family protein
BN973_01561	CDO87210.1	0	0	175	nucleotidyltransferase/DNA polymerase involved in DNA repair
BN973_01560	CDO87209.1	0	0	196	hypothetical protein
BN973_01563	CDO87212.1	0	1	158	inosine-uridine preferring nucleoside hydrolase
BN973_01562	CDO87211.1	0	0	156	3-oxoacyl-(acyl carrier protein) synthase II
BN973_00162	CDO85829.1	0	0	170	arsenic-transport integral membrane protein ArsC
BN973_00163	CDO85830.1	0	0	180	arsenic-transport integral membrane protein ArsC
BN973_00160	CDO85827.1	0	1	154	TetR family transcriptional regulator
BN973_00161	CDO85828.1	0	0	272	putative arsenical resistance operon repressor
BN973_00166	CDO85833.1	0	0	148	acyl-CoA dehydrogenase
BN973_00167	CDO85834.1	0	0	165	carboxymuconolactone decarboxylase
BN973_00164	CDO85831.1	0	0	196	glyoxalase/Bleomycin resistance protein/Dioxygenase superfamily protein
BN973_00165	CDO85832.1	0	0	132	acyl-CoA dehydrogenase
BN973_00168	CDO85835.1	0	0	139	taurine catabolism dioxygenase TauD, TfdA family protein
BN973_00169	CDO85836.1	0	0	228	hypothetical protein
BN973_00485	CDO86144.1	0	0	187	putative reductase
BN973_00484	CDO86143.1	0	0	308	FAD-binding monooxygenase
BN973_03127	CDO88757.1	0	0	114	PPE family protein
BN973_03126	CDO88756.1	0	1	166	PPE family protein
BN973_03125	CDO88755.1	0	0	173	EsaT-6 like protein EsxN
BN973_03124	CDO88754.1	0	0	139	lipoprotein LprJ
BN973_03123	CDO88753.1	0	0	134	PPE family protein
BN973_03122	CDO88752.1	0	0	152	PPE family protein
BN973_03120	CDO88751.1	0	0	149	ATPase AAA
BN973_03129	CDO88759.1	0	0	180	hypothetical protein
BN973_03128	CDO88758.1	0	1	154	hypothetical protein
BN973_02838	CDO88472.1	0	1	136	DNA polymerase LigD ligase subunit
BN973_02839	CDO88473.1	0	0	167	ATP-dependent DNA ligase
BN973_02832	CDO88466.1	0	0	119	lipid-transfer protein
BN973_02833	CDO88467.1	0	0	165	putative nucleic-acid-binding protein containing a Zn-ribbon
BN973_02830	NA	0	0	159	tRNA-Leu
BN973_02831	CDO88465.1	1	0	147	response regulator
BN973_02836	CDO88470.1	0	0	141	dephospho-CoA kinase domain fusion protein
BN973_02837	CDO88471.1	0	0	150	hypothetical protein
BN973_02834	CDO88468.1	1	0	135	DNA polymerase I
BN973_02835	CDO88469.1	1	0	548	30S ribosomal protein S1
BN973_03462	CDO89091.1	0	1	148	cytochrome P450 family protein
BN973_03463	CDO89092.1	0	1	164	TetR family transcriptional regulator
BN973_03460	CDO89089.1	0	0	169	dehydrogenase
BN973_03461	CDO89090.1	0	0	111	cytochrome P450 family protein
BN973_03466	CDO89095.1	0	0	159	short chain dehydrogenase
BN973_03467	CDO89096.1	0	0	136	TetR family transcriptional regulator
BN973_03464	CDO89093.1	0	0	175	short-chain dehydrogenase/reductase SDR
BN973_04305	CDO89918.1	0	0	165	adenylate cyclase
BN973_04308	CDO89921.1	0	1	129	LysR family transcriptional regulator
BN973_04309	CDO89922.1	0	0	149	Emopamil binding protein
BN973_01718	CDO87365.1	0	0	137	dehydrogenase
BN973_01719	CDO87366.1	0	0	135	succinate dehydrogenase/fumarate reductase flavoprotein subunit
BN973_01712	CDO87359.1	0	0	135	oxidoreductase
BN973_01713	CDO87360.1	0	0	178	AraC family transcriptional regulator
BN973_01710	CDO87357.1	0	0	158	lipoprotein LpqB
BN973_01711	CDO87358.1	0	0	119	type 12 methyltransferase
BN973_01716	CDO87363.1	0	0	162	regulatory protein
BN973_01717	CDO87364.1	0	0	184	oxidoreductase
BN973_01714	CDO87361.1	0	0	104	AraC family transcriptional regulator
BN973_01715	CDO87362.1	0	0	137	AraC family transcriptional regulator
BN973_01358	CDO87007.1	0	0	137	mycofactocin precursor
BN973_01978	CDO87623.1	0	0	92	hypothetical protein
BN973_01979	CDO87624.1	0	0	177	hypothetical protein
BN973_01976	CDO87621.1	0	0	114	sulfotransferase family protein
BN973_01977	CDO87622.1	0	0	124	oxidoreductase
BN973_01974	CDO87619.1	0	0	132	Bacterial regulatory proteins, tetR family
BN973_01975	CDO87620.1	0	0	169	hypothetical protein
BN973_01972	CDO87617.1	0	0	158	short-chain dehydrogenase/reductase SDR
BN973_01973	CDO87618.1	0	0	179	short-chain dehydrogenase
BN973_01970	CDO87615.1	0	0	146	phosphate ABC transporter substrate-binding protein
BN973_01971	CDO87616.1	0	0	82	M protein
BN973_00599	CDO86257.1	0	1	137	acetyl-CoA acetyltransferase
BN973_00598	CDO86256.1	0	0	124	hypothetical protein
BN973_00593	CDO86251.1	0	0	96	TetR family transcriptional regulator
BN973_00592	CDO86250.1	0	0	185	hypothetical protein
BN973_00591	CDO86249.1	0	0	159	sulfotransferase family protein
BN973_00590	CDO86248.1	0	0	190	acyl dehydratase
BN973_00597	CDO86255.1	0	0	104	caib/baif family protein
BN973_00596	CDO86254.1	0	1	185	amidohydrolase
BN973_00595	CDO86253.1	0	1	194	LacI family transcriptional regulator
BN973_00594	CDO86252.1	0	0	133	putative metal-dependent hydrolase of the TIM-barrel fold protein
BN973_03718	CDO89343.1	0	0	128	TetR family transcriptional regulator
BN973_03719	CDO89344.1	1	0	148	phosphoglycerate mutase
BN973_03714	CDO89340.1	0	0	153	adenylate cyclase, putative
BN973_03716	CDO89341.1	0	0	161	cytochrome P450 superfamily protein
BN973_03717	CDO89342.1	0	0	107	ferredoxin
BN973_03710	CDO89336.1	0	0	176	alpha/beta hydrolase
BN973_03711	CDO89337.1	1	0	131	3-methyl-2-oxobutanoate hydroxymethyltransferase
BN973_03712	CDO89338.1	0	0	150	exported protein
BN973_03713	CDO89339.1	0	0	208	hypothetical protein
BN973_02443	CDO88084.1	0	0	200	lipoprotein LprJ
BN973_02442	CDO88083.1	0	0	213	hypothetical protein
BN973_02441	CDO88082.1	0	0	167	lipoprotein LprJ
BN973_02440	CDO88081.1	0	0	117	ATP-dependent protease ATP-binding subunit ClpC2
BN973_02447	CDO88088.1	0	0	98	glycosyl transferase family protein
BN973_02446	CDO88087.1	0	0	144	transcriptional regulator
BN973_02445	CDO88086.1	0	0	96	integral membrane protein
BN973_02444	CDO88085.1	0	0	107	hypothetical protein
BN973_02995	CDO88626.1	0	0	152	putative membrane protein
BN973_02994	CDO88625.1	0	0	133	pyridine nucleotide-disulfide oxidoreductase, putative
BN973_02997	CDO88628.1	0	0	142	putative long-chain fatty-acid--CoA ligase
BN973_02448	CDO88089.1	0	0	204	hypothetical protein
BN973_02991	CDO88622.1	0	0	118	polyketide cyclase/dehydrase and lipid transport
BN973_02990	CDO88621.1	0	0	157	hypothetical protein
BN973_02993	CDO88624.1	0	1	110	oxidoreductase
BN973_02992	CDO88623.1	0	0	142	pyrimidine reductase, riboflavin biosynthesis
BN973_00629	CDO86287.1	0	0	142	TetR family transcriptional regulator
BN973_00628	CDO86286.1	0	0	159	putative membrane protein
BN973_00625	CDO86283.1	0	0	162	TetR family transcriptional regulator
BN973_00624	CDO86282.1	0	0	143	pyridoxamine 5'-phosphate oxidase
BN973_00627	CDO86285.1	0	0	137	TetR family transcriptional regulator
BN973_00626	CDO86284.1	0	0	157	integral membrane protein
BN973_00621	CDO86279.1	0	0	143	short chain dehydrogenase/reductase family oxidoreductase
BN973_00620	CDO86278.1	0	0	145	sulfotransferase
BN973_00623	CDO86281.1	0	0	233	polyketide cyclase / dehydrase and lipid transport
BN973_00622	CDO86280.1	0	0	123	LysR family transcriptional regulator
BN973_03822	CDO89446.1	0	0	125	arabinose efflux permease family protein
BN973_04291	CDO89904.1	0	0	167	putative antigen Cfp10A
BN973_03820	CDO89444.1	0	0	106	alpha/beta hydrolase
BN973_03821	CDO89445.1	0	0	133	PPE family protein
BN973_04294	CDO89907.1	0	0	125	transcriptional regulator
BN973_03827	CDO89451.1	0	1	110	F420-dependent methylene-tetrahydromethanopterin reductase
BN973_04296	CDO89909.1	0	0	97	nicotinate phosphoribosyltransferase
BN973_04297	CDO89910.1	0	0	120	deaD/DeaH family protein helicase
BN973_04298	CDO89911.1	0	0	129	glycogen phosphorylase GlgP
BN973_04299	CDO89912.1	0	0	175	alpha-amylase
BN973_03828	CDO89452.1	0	0	141	dihydrodipicolinate reductase
BN973_03829	CDO89453.1	0	0	120	luciferase family protein
BN973_02195	CDO87837.1	0	0	155	phenolpthiocerol synthesis type-I polyketide synthase PpsA
BN973_02194	CDO87836.1	0	0	150	phenolpthiocerol synthesis type-I polyketide synthase PpsC
BN973_02197	CDO87839.1	1	0	168	cell division initiation protein
BN973_02196	CDO87838.1	0	0	157	thioesterase
BN973_02191	CDO87833.1	0	0	107	daunorubicin-DIM-transport ATP-binding protein ABC transporter DrrA
BN973_02190	CDO87832.1	0	0	119	multidrug ABC transporter inner membrane protein
BN973_02193	CDO87835.1	0	0	151	phenolpthiocerol synthesis type-I polyketide synthase PpsD
BN973_02192	CDO87834.1	0	0	130	phenolpthiocerol synthesis type-I polyketide synthase PpsE
BN973_02199	CDO87841.1	1	0	135	ribonuclease III
BN973_02198	CDO87840.1	0	0	125	putative metal-binding protein, possibly nucleic-acid binding protein
BN973_02669	CDO88305.1	1	0	113	protoheme IX farnesyltransferase
BN973_02668	CDO88304.1	1	0	143	transketolase
BN973_03800	CDO89424.1	0	0	138	putative dehydrogenase
BN973_03803	CDO89427.1	0	0	136	2-hydroxychromene-2-carboxylate isomerase
BN973_04908	CDO90513.1	0	0	157	polyketide cyclase / dehydrase and lipid transport
BN973_04909	CDO90514.1	0	0	142	long-chain-fatty-acid--CoA ligase
BN973_04900	CDO90505.1	0	0	148	transmembrane protein
BN973_04901	CDO90506.1	0	0	144	rhodanese domain-containing protein
BN973_04902	CDO90507.1	0	0	108	cysteine dioxygenase type I superfamily protein
BN973_04903	CDO90508.1	0	0	177	lpqV
BN973_04904	CDO90509.1	0	0	152	patatin
BN973_04905	CDO90510.1	0	0	116	phospholipase, patatin family protein
BN973_04906	CDO90511.1	0	0	121	glutamine amidotransferase, class-II
BN973_04907	CDO90512.1	0	0	632	_1 transposase
BN973_01363	CDO87012.1	0	0	114	membrane sugar transferase
BN973_01362	CDO87011.1	0	0	157	creatininase subfamily protein
BN973_01361	CDO87010.1	0	0	168	FMN-dependent dehydrogenase
BN973_01360	CDO87009.1	0	0	165	radical SAM domain-containing protein
BN973_01367	CDO87016.1	0	0	163	cytochrome P450 family protein
BN973_01366	CDO87015.1	0	1	171	TetR family transcriptional regulator
BN973_01365	CDO87014.1	0	0	154	sugar phosphate permease
BN973_01364	CDO87013.1	0	0	140	dehydrogenase
BN973_01369	CDO87018.1	1	0	153	50S ribosomal protein L3
BN973_01368	CDO87017.1	1	0	271	30S ribosomal protein S10
BN973_00360	CDO86022.1	0	0	107	transmembrane protein
BN973_00361	CDO86023.1	0	0	173	hypothetical protein
BN973_00362	CDO86024.1	0	0	127	ESX-1 secretion-associated protein EspK
BN973_00363	CDO86025.1	0	0	160	hypothetical alanine and glycine rich protein
BN973_00364	CDO86026.1	0	0	154	FkbM family methyltransferase
BN973_00365	CDO86027.1	0	0	133	dioxygenase
BN973_00366	CDO86028.1	0	0	175	hypothetical protein
BN973_00367	CDO86029.1	0	0	165	hypothetical protein
BN973_00368	CDO86030.1	0	0	182	hypothetical protein
BN973_00369	CDO86031.1	0	0	210	hypothetical protein
BN973_04845	CDO90451.1	0	0	153	peroxidase BpoB
BN973_04844	CDO90450.1	0	1	198	3-demethylubiquinone-9 3-methyltransferase
BN973_04847	CDO90453.1	0	0	154	glucose-6-phosphate 1-dehydrogenase
BN973_04846	CDO90452.1	0	0	141	6-phosphogluconate dehydrogenase
BN973_04841	CDO90447.1	0	0	141	hypothetical protein
BN973_04840	CDO90446.1	0	0	156	DoxX family protein
BN973_04843	CDO90449.1	0	0	140	alpha/beta hydrolase
BN973_04842	CDO90448.1	0	0	88	acyltransferase, WS/DGAT/MGAT
BN973_04849	CDO90455.1	0	0	118	adenylate and guanylate cyclase catalytic domain-containing protein
BN973_04848	CDO90454.1	0	0	153	adenylate and guanylate cyclase catalytic domain-containing protein
BN973_01507	CDO87156.1	0	0	144	virulence factor Mce family protein
BN973_01506	CDO87155.1	0	0	141	virulence factor Mce family protein
BN973_01505	CDO87154.1	0	0	139	integral membrane protein YrbE3B
BN973_01504	CDO87153.1	0	0	150	organic solvent resistance ABC transporter permease
BN973_01503	CDO87152.1	0	0	198	Cupin domain protein
BN973_01502	CDO87151.1	0	0	145	Rieske (2Fe-2S) domain-containing protein
BN973_01501	CDO87150.1	0	0	163	integrase catalytic subunit
BN973_01500	CDO87149.1	0	0	185	alpha/beta hydrolase domain-containing protein
BN973_02228	CDO87870.1	1	0	205	50S ribosomal protein L19
BN973_01509	CDO87158.1	0	0	127	MCE-family protein, Mce3C
BN973_01508	CDO87157.1	0	0	290	virulence factor Mce family protein
BN973_00104	CDO85771.1	0	0	213	transmembrane protein
BN973_00105	CDO85772.1	0	0	146	enoyl-CoA hydratase, EchA3
BN973_05466	CDO91060.1	0	0	91	nucleic-acid-binding protein containing a Zn-ribbon
BN973_05467	CDO91061.1	0	0	130	acyl-CoA dehydrogenase
BN973_05460	CDO91054.1	0	0	171	2-keto-4-pentenoate hydratase
BN973_05461	CDO91055.1	0	0	139	3-ketosteroid-delta-1-dehydrogenase
BN973_05462	CDO91056.1	0	0	130	MaoC like domain-containing protein
BN973_05463	CDO91057.1	0	0	112	hypothetical protein
BN973_00108	CDO85775.1	0	1	105	hypothetical protein
BN973_00109	CDO85776.1	0	0	120	CHAT domain protein
BN973_04599	CDO90206.1	0	0	171	2-deoxy-D-gluconate 3-dehydrogenase
BN973_04598	CDO90205.1	0	0	114	acyl-CoA dehydrogenase domain-containing protein
BN973_04597	CDO90204.1	0	0	127	acyl-CoA dehydrogenase domain-containing protein
BN973_04596	CDO90203.1	0	0	113	enoyl-CoA hydratase/isomerase
BN973_04595	CDO90202.1	0	0	199	hypothetical protein
BN973_04594	CDO90201.1	0	0	123	hypothetical protein
BN973_04593	CDO90200.1	0	0	150	phosphotransferase
BN973_04592	CDO90199.1	0	0	140	hypothetical protein
BN973_04591	CDO90198.1	0	0	135	hypothetical protein
BN973_04590	CDO90197.1	0	0	117	TetR family transcriptional regulator
BN973_03109	CDO88740.1	0	0	148	PE family protein
BN973_03108	CDO88739.1	0	0	164	PPE family protein
BN973_04339	NA	0	0	280	tRNA-Arg
BN973_04338	CDO89948.1	1	0	117	arginyl-tRNA synthetase
BN973_03453	CDO89082.1	0	0	116	DoxX subfamily protein, putative
BN973_04332	CDO89942.1	1	0	185	50S ribosomal protein L31
BN973_04331	CDO89941.1	1	0	178	peptide chain release factor 1
BN973_04330	CDO89940.1	0	0	127	HemK family modification methylase
BN973_03105	CDO88736.1	0	0	156	FtsK/SpoIIIE family protein
BN973_03104	CDO88735.1	0	0	165	ESX-2 secretion system protein eccB2
BN973_03455	CDO89084.1	0	0	129	phosphotransferase enzyme family protein
BN973_03106	CDO88737.1	0	0	133	cytochrome P450 143A4 Cyp143A4
BN973_02858	CDO88492.1	0	0	108	phage shock protein A, PspA
BN973_02859	CDO88493.1	0	0	128	hypothetical protein
BN973_02854	CDO88488.1	0	0	185	hypothetical protein
BN973_02855	CDO88489.1	0	0	167	hypothetical protein
BN973_02856	CDO88490.1	0	0	169	transglutaminase domain-containing protein
BN973_02857	CDO88491.1	0	0	156	Ser/Thr protein kinase
BN973_02850	CDO88484.1	1	0	151	excinuclease ABC subunit A
BN973_02851	CDO88485.1	0	0	115	NYN domain protein
BN973_02852	CDO88486.1	0	0	176	linoleoyl-CoA desaturase
BN973_02853	CDO88487.1	0	0	202	cold-shock DNA-binding family protein
BN973_02278	CDO87920.1	0	0	120	ferric uptake regulation protein FurB-like protein
BN973_02279	CDO87921.1	0	0	127	mycothione reductase
BN973_02270	CDO87912.1	1	0	160	methionine aminopeptidase
BN973_02271	CDO87913.1	0	0	93	cobyric acid synthase
BN973_02272	CDO87914.1	0	0	114	hypothetical protein
BN973_02273	CDO87915.1	0	0	117	class I glutamine amidotransferase, putative
BN973_02274	CDO87916.1	0	0	136	PPE family protein
BN973_02275	CDO87917.1	0	0	99	hypothetical protein
BN973_02276	CDO87918.1	0	0	113	type I phosphodiesterase / nucleotide pyrophosphatase superfamily protein
BN973_02277	CDO87919.1	0	0	158	nickel-transport integral membrane protein NICT
BN973_01406	CDO87055.1	0	0	176	zinc-binding dehydrogenase
BN973_01407	CDO87056.1	0	0	152	methyltransferase
BN973_01404	CDO87053.1	0	0	120	methyltransferase
BN973_04247	CDO89861.1	0	0	144	metal-dependent hydrolase
BN973_01405	CDO87054.1	0	0	167	short-chain dehydrogenase
BN973_03566	CDO89194.1	0	0	132	protein pafB
BN973_01402	CDO87051.1	0	0	159	methyltransferase, putative, family protein
BN973_03565	CDO89193.1	0	0	112	putative transcriptional regulator
BN973_01151	CDO86804.1	0	0	192	eptc-inducible aldehyde dehydrogenase
BN973_03296	CDO88926.1	0	0	151	ferredoxin
BN973_01400	CDO87049.1	0	0	146	flavin-dependent oxidoreductase
BN973_03563	CDO89191.1	1	0	125	twin arginine-targeting protein translocase TatC
BN973_01401	CDO87050.1	0	0	152	endopeptidase IV
BN973_03290	CDO88920.1	0	0	143	limonene-1,2-epoxide hydrolase
BN973_03561	CDO89189.1	0	1	198	hypothetical protein
BN973_04240	CDO89854.1	0	0	119	NAD-dependent aldehyde dehydrogenase
BN973_01778	CDO87425.1	0	0	199	putative threonine and proline rich protein
BN973_01779	CDO87426.1	0	0	256	ATP-binding protein
BN973_01774	CDO87421.1	0	0	179	chromosome partitioning protein ParA
BN973_01775	CDO87422.1	0	0	173	hypothetical alanine valine rich protein
BN973_01776	CDO87423.1	1	0	257	rhlE
BN973_01777	CDO87424.1	0	0	123	hydroxylase for synthesis of 2-methylthio-cis-ribozeatin in tRNA
BN973_01770	CDO87417.1	0	0	141	putative integral membrane protein
BN973_01771	CDO87418.1	0	0	146	N-acetyltransferase Ats1
BN973_01772	CDO87419.1	0	0	144	isochorismate synthase EntC
BN973_01773	CDO87420.1	0	0	137	acid phosphatase
BN973_01198	CDO86851.1	0	0	132	esat-6 like protein EsxE
BN973_01199	CDO86852.1	0	0	101	putative ESAT-6 like protein ESXF
BN973_01190	CDO86843.1	0	0	148	pyrroline-5-carboxylate reductase
BN973_01191	CDO86844.1	1	0	148	excisionase family DNA-binding protein
BN973_01192	CDO86845.1	1	0	128	UDP-glucose 4-epimerase GalE2
BN973_01193	CDO86846.1	0	0	194	phospholipid/glycerol acyltransferase
BN973_01194	CDO86847.1	0	0	414	cyclopropane-fatty-acyl-phospholipid synthase
BN973_01195	CDO86848.1	0	0	189	acyl dehydratase
BN973_01196	CDO86849.1	1	0	152	HAD-superfamily protein subfamily protein IB hydrolase
BN973_01197	CDO86850.1	0	0	140	ADP-ribosyltransferse
BN973_00823	CDO86480.1	0	0	81	exported protein
BN973_00822	CDO86479.1	0	0	184	mmpL11 protein
BN973_00821	CDO86478.1	0	0	170	hypothetical protein
BN973_00820	CDO86477.1	0	0	180	transmembrane protein
BN973_00827	CDO86484.1	0	0	180	hypothetical protein
BN973_00826	CDO86483.1	0	0	179	mmpL3
BN973_00825	CDO86482.1	0	0	174	transmembrane protein
BN973_00824	CDO86481.1	0	0	197	transmembrane protein
BN973_00829	CDO86486.1	0	0	111	hypothetical protein
BN973_00828	CDO86485.1	0	0	173	tRNA (guanine-N(7)-)-methyltransferase
BN973_01990	CDO87635.1	0	0	221	lipoprotein LprJ
BN973_01991	CDO87636.1	0	0	171	P450 heme-thiolate protein
BN973_01992	CDO87637.1	0	0	155	3-alpha-(or 20-beta)-hydroxysteroid dehydrogenase
BN973_01993	CDO87638.1	0	0	150	transcriptional regulator
BN973_01994	CDO87639.1	0	0	149	cytochrome p450
BN973_01995	CDO87640.1	0	0	139	hypothetical protein
BN973_01996	CDO87641.1	0	0	153	transporter
BN973_01997	CDO87642.1	0	0	164	short-chain dehydrogenase
BN973_01998	CDO87643.1	0	0	166	hypothetical protein
BN973_01999	CDO87644.1	0	0	126	dimethylaniline monooxygenase
BN973_01114	CDO86768.1	0	0	154	CDP-diacylglycerol--serine O-phosphatidyltransferase
BN973_01116	CDO86770.1	0	0	154	hypothetical protein
BN973_03736	CDO89361.1	0	0	280	putative endoIII-related endonuclease
BN973_03737	CDO89362.1	0	0	123	phosphate-transport system regulatory protein PhoY2
BN973_04102	CDO89722.1	1	0	130	GTP1/OBG-family GTP-binding protein OBG
BN973_03735	CDO89360.1	0	0	119	glycosyl transferase family protein
BN973_03732	CDO89357.1	0	0	101	hypothetical protein
BN973_03733	CDO89358.1	0	0	105	hypothetical proline rich protein
BN973_04106	CDO89726.1	0	0	152	ribonuclease
BN973_03731	CDO89356.1	0	0	159	epoxide hydrolase
BN973_04108	CDO89728.1	0	0	123	putative integral membrane protein
BN973_04109	CDO89729.1	0	0	107	FolC protein
BN973_03738	NA	0	0	175	tRNA-Val
BN973_03739	CDO89363.1	0	0	153	alkyl hydroperoxide reductase/ Thiol specific antioxidant/ Mal allergen
BN973_02465	NA	0	0	416	tRNA-Cys
BN973_02464	NA	0	0	253	tRNA-Val
BN973_02467	NA	0	0	114	tRNA-Val
BN973_02466	NA	0	0	359	tRNA-Gly
BN973_02461	CDO88102.1	0	0	99	hypothetical protein
BN973_02460	CDO88101.1	0	0	229	hypothetical protein
BN973_02463	CDO88104.1	0	0	137	YcfA-like protein
BN973_02462	CDO88103.1	0	0	139	hypothetical protein
BN973_02469	CDO88106.1	0	0	138	biotin carboxylase
BN973_02468	CDO88105.1	0	0	146	major facilitator superfamily multidrug efflux transporter
BN973_00647	CDO86305.1	0	0	131	methyltransferase type 11
BN973_00646	CDO86304.1	0	0	269	TetR family transcriptional regulator
BN973_00645	CDO86303.1	0	0	235	short chain dehydrogenase
BN973_00644	CDO86302.1	0	0	123	hypothetical protein
BN973_00643	CDO86301.1	0	0	248	hypothetical protein
BN973_00642	CDO86300.1	0	0	124	membrane protein
BN973_00641	CDO86299.1	0	0	123	mmgE/PrpD family protein
BN973_00640	CDO86298.1	0	0	138	transcriptional regulator
BN973_00649	CDO86307.1	0	0	223	transcriptional regulatory protein
BN973_00648	CDO86306.1	0	0	134	alpha/beta hydrolase fold family hydrolase
BN973_03598	CDO89226.1	1	0	139	cysteinyl-tRNA synthetase
BN973_03599	CDO89227.1	0	0	165	inositol monophosphatase family protein
BN973_03592	CDO89220.1	0	0	149	Mce associated membrane protein
BN973_03593	CDO89221.1	0	0	155	Mannan-binding protein
BN973_03590	CDO89218.1	0	0	145	mce related protein
BN973_03591	CDO89219.1	0	0	148	mce related protein
BN973_03596	CDO89224.1	1	0	138	ATP-grasp superfamily protein
BN973_03597	CDO89225.1	0	0	162	L-asparagine permease
BN973_03594	CDO89222.1	0	0	130	methyltransferase, putative, family protein
BN973_03595	CDO89223.1	0	0	168	B12-dependent methionine synthase
BN973_03844	CDO89468.1	0	0	118	metal-dependent hydrolase
BN973_03845	CDO89469.1	0	0	158	3'(2'),5'-bisphosphate nucleotidase
BN973_03846	CDO89470.1	0	0	185	hypothetical protein
BN973_03847	CDO89471.1	0	0	129	acetyl-CoA C-acyltransferase
BN973_03840	CDO89464.1	0	0	135	TetR family transcriptional regulator
BN973_03841	CDO89465.1	0	0	117	hypothetical protein
BN973_03842	CDO89466.1	0	0	110	sulfotransferase family protein
BN973_03843	CDO89467.1	0	0	105	hypothetical protein
BN973_03848	CDO89472.1	0	0	139	alcohol dehydrogenase B
BN973_03849	CDO89473.1	0	0	111	membrane protein
BN973_03579	CDO89207.1	0	0	125	mercuric reductase
BN973_03160	CDO88790.1	0	0	162	CBS domain-containing protein
BN973_02649	CDO88285.1	1	0	145	hypothetical protein
BN973_02648	CDO88284.1	1	0	134	nucleotide-binding protein
BN973_02641	CDO88277.1	0	0	237	hypothetical protein
BN973_02640	CDO88276.1	0	0	167	hypothetical protein
BN973_02643	CDO88279.1	1	0	107	6,7-dimethyl-8-ribityllumazine synthase
BN973_02642	CDO88278.1	1	0	147	bifunctional 3,4-dihydroxy-2-butanone 4-phosphate synthase/GTP cyclohydrolase II protein
BN973_02645	CDO88281.1	0	0	80	lipoprotein LprH
BN973_02644	CDO88280.1	0	0	94	hypothetical protein
BN973_02647	CDO88283.1	0	0	120	excinuclease ABC subunit C
BN973_02646	CDO88282.1	0	0	244	putative antigen
BN973_04678	CDO90285.1	0	0	144	putative 6-phosphofructokinase
BN973_04679	CDO90286.1	0	0	96	TetR family transcriptional regulator
BN973_04922	CDO90526.1	0	0	122	PPE family protein
BN973_04923	CDO90527.1	0	0	456	esat-6 like protein
BN973_04920	NA	0	0	184	tRNA-Leu
BN973_04921	CDO90525.1	0	0	150	PE family protein
BN973_04926	CDO90530.1	0	0	139	two component sensor histidine kinase trcs
BN973_04927	CDO90531.1	0	0	251	hypothetical protein
BN973_04924	CDO90528.1	0	0	201	EsaT-6 like protein EsxN
BN973_04925	CDO90529.1	0	0	151	DNA-binding response regulator TrcR
BN973_04928	CDO90532.1	0	0	194	potassium-transporting ATPase subunit A
BN973_04929	CDO90533.1	0	0	130	potassium-transporting ATPase subunit B
BN973_01345	CDO86994.1	1	0	672	30S ribosomal protein S12
BN973_01344	CDO86993.1	0	0	140	transcriptional regulator
BN973_01347	CDO86996.1	0	0	542	elongation factor G
BN973_01346	CDO86995.1	1	0	404	30S ribosomal protein S7
BN973_01341	CDO86990.1	0	0	139	enoyl-CoA hydratase
BN973_01340	CDO86989.1	0	0	140	putative regulatory protein
BN973_01343	CDO86992.1	0	1	158	transmembrane protein
BN973_01342	CDO86991.1	0	0	227	putative threonine rich protein
BN973_01349	CDO86998.1	0	0	135	PE-PGRS family protein
BN973_03950	CDO89571.1	0	1	115	virulence factor Mce
BN973_01699	CDO87346.1	0	0	161	mannose-6-phosphate isomerase, class I
BN973_01698	CDO87345.1	0	0	119	TobH protein
BN973_05194	CDO90794.1	0	0	126	nitroreductase
BN973_05195	CDO90795.1	0	0	163	aldehyde dehydrogenase
BN973_05196	CDO90796.1	0	0	266	4-carboxymuconolactone decarboxylase
BN973_03951	CDO89572.1	0	1	174	virulence factor Mce
BN973_05190	CDO90790.1	0	0	100	membrane protein
BN973_05191	CDO90791.1	0	0	159	membrane protein
BN973_05192	CDO90792.1	0	0	127	acyl-CoA dehydrogenase
BN973_05193	CDO90793.1	0	0	118	acyl-CoA dehydrogenase
BN973_04676	CDO90283.1	0	0	116	PEP-utilizing protein
BN973_05198	CDO90798.1	0	0	104	amidohydrolase family protein
BN973_05199	CDO90799.1	0	0	155	amidohydrolase 2
BN973_03957	CDO89578.1	0	0	134	cysteine desulfurase
BN973_04674	CDO90281.1	0	0	106	hypothetical protein
BN973_04829	CDO90436.1	0	0	166	NAD dependent epimerase/dehydratase
BN973_04828	CDO90435.1	0	0	191	short chain dehydrogenase/reductase family oxidoreductase
BN973_04827	CDO90434.1	0	0	137	TetR family transcriptional regulator
BN973_04826	CDO90433.1	0	0	205	nitroreductase family protein
BN973_04825	CDO90432.1	0	1	146	acyl-CoA dehydrogenase domain-containing protein
BN973_04675	CDO90282.1	0	0	119	PPOX class probable F420-dependent enzyme, family
BN973_04823	CDO90430.1	0	0	137	short-chain dehydrogenase/reductase SDR
BN973_04822	CDO90429.1	0	0	111	nitric oxide reductase activation protein
BN973_04821	CDO90428.1	0	0	166	putative denitrification regulatory protein nirQ
BN973_04820	CDO90427.1	0	0	199	amino acid ABC transporter substrate-binding protein
BN973_01529	CDO87178.1	0	0	107	butyryl-CoA dehydrogenase
BN973_01528	CDO87177.1	0	0	159	enoyl-CoA hydratase/isomerase
BN973_01521	CDO87170.1	0	0	127	acetaldehyde dehydrogenase
BN973_01520	CDO87169.1	0	0	102	2-keto-4-pentenoate hydratase
BN973_01523	CDO87172.1	0	0	114	short-chain dehydrogenase/reductase SDR
BN973_01522	CDO87171.1	0	0	112	4-hydroxy-2-ketovalerate aldolase
BN973_01525	CDO87174.1	0	0	120	hypothetical protein
BN973_01524	CDO87173.1	0	0	170	cytochrome p450
BN973_01527	CDO87176.1	0	0	130	acyl-CoA dehydrogenase
BN973_01526	CDO87175.1	0	0	153	putative regulatory protein
BN973_00575	CDO86233.1	0	0	126	regulatory protein LuxR
BN973_05278	CDO90878.1	0	0	102	putative NAD-dependent epimerase/dehydratase
BN973_05275	CDO90875.1	0	0	228	FdxB protein
BN973_00578	CDO86236.1	0	1	169	catalase
BN973_04942	CDO90546.1	0	0	170	TetR family transcriptional regulator
BN973_04943	NA	0	0	124	tRNA-Gln
BN973_00348	CDO86010.1	0	0	186	hypothetical protein
BN973_00349	CDO86011.1	0	0	210	hypothetical protein
BN973_00342	CDO86004.1	0	0	98	chromosome partitioning ATPase
BN973_00343	CDO86005.1	0	1	119	RNA polymerase sigma factor SigI
BN973_00340	CDO86002.1	1	0	186	glutamate synthase subunit beta
BN973_00341	CDO86003.1	1	0	157	ferredoxin-dependent glutamate synthase 1
BN973_00346	CDO86008.1	0	0	116	transcriptional regulator
BN973_00347	CDO86009.1	0	0	124	hypothetical alanine rich protein
BN973_00344	CDO86006.1	0	0	137	putative nucleoside-diphosphate sugar epimerase
BN973_00345	CDO86007.1	0	1	109	deazaflavin-dependent nitroreductase family protein
BN973_03699	CDO89325.1	0	0	206	RDD family protein, putative
BN973_04052	CDO89672.1	1	0	140	transglutaminase domain-containing protein
BN973_03001	CDO88632.1	0	0	123	3-ketosteroid-delta-1-dehydrogenase
BN973_03691	CDO89317.1	0	0	127	short chain dehydrogenase
BN973_03690	CDO89316.1	1	0	122	leucyl aminopeptidase
BN973_03693	CDO89319.1	0	0	104	nucleoside-diphosphate sugar epimerase
BN973_03692	CDO89318.1	1	0	142	dihydrolipoamide acetyltransferase
BN973_03695	CDO89321.1	0	1	166	REP13E12 repeat protein
BN973_03002	CDO88633.1	0	0	130	oxygenase KshA
BN973_03697	CDO89323.1	0	0	141	lipoate biosynthesis protein A
BN973_03696	CDO89322.1	1	0	108	lipoate-protein ligase B
BN973_01839	CDO87485.1	0	0	141	Rho termination factor
BN973_01838	CDO87484.1	0	1	128	hypothetical protein
BN973_01833	CDO87479.1	0	1	166	endonuclease/exonuclease/phosphatase
BN973_04056	CDO89676.1	1	0	147	DNA polymerase III subunit delta
BN973_01831	CDO87477.1	0	0	149	hypothetical protein
BN973_01830	CDO87476.1	0	0	170	CsbD family protein
BN973_01837	CDO87483.1	0	0	186	glycosyl transferase family protein
BN973_01836	CDO87482.1	0	1	102	dehydrogenase
BN973_01835	CDO87481.1	0	0	109	GlcNAc-PI de-N-acetylase
BN973_03005	CDO88636.1	0	0	127	flavoprotein
BN973_04054	CDO89674.1	1	0	127	glutamate--cysteine ligase, Gcs2
BN973_04055	CDO89675.1	1	0	253	30S ribosomal protein S20
BN973_05338	CDO90933.1	0	0	155	alpha/beta hydrolase fold protein
BN973_00023	CDO85693.1	0	0	84	hypothetical protein
BN973_05448	CDO91042.1	0	0	162	Ser/Thr protein kinase
BN973_00129	CDO85796.1	0	0	188	dehydrogenase
BN973_00126	CDO85793.1	0	0	158	TetR family transcriptional regulator
BN973_05331	CDO90926.1	0	0	154	putative aminoglycoside phosphotransferase
BN973_00124	CDO85791.1	0	0	178	hypothetical protein
BN973_05333	CDO90928.1	0	0	125	glyoxalase
BN973_00122	CDO85789.1	0	0	159	cutinase precursor Cut5
BN973_05443	CDO91037.1	0	0	186	putative nucleic-acid-binding protein containing a Zn-ribbon
BN973_00120	CDO85787.1	0	0	144	CsbD family protein
BN973_00121	CDO85788.1	0	0	167	deazaflavin-dependent nitroreductase family protein
BN973_00020	CDO85690.1	1	0	482	regulatory protein
BN973_03479	CDO89108.1	0	0	116	flavoprotein involved in K+ transport
BN973_03478	CDO89107.1	0	0	117	dehydrogenase
BN973_03475	CDO89104.1	0	0	127	N-acyl-D-aspartate/D-glutamate deacylase
BN973_00027	CDO85697.1	1	0	207	ponA_2
BN973_03477	CDO89106.1	0	0	111	zinc-binding dehydrogenase
BN973_03476	CDO89105.1	0	0	108	alpha/beta hydrolase fold protein
BN973_03471	CDO89100.1	0	0	173	transcriptional regulator
BN973_03470	CDO89099.1	0	0	187	dihydrodipicolinate reductase
BN973_03473	CDO89102.1	0	0	102	Rieske (2Fe-2S) domain-containing protein
BN973_00026	CDO85696.1	1	0	167	WhiB4
BN973_00025	CDO85695.1	1	0	135	anion transporter ATPase
BN973_00024	CDO85694.1	1	0	159	anion transporter ATPase
BN973_02876	CDO88510.1	1	0	111	ornithine carbamoyltransferase
BN973_02877	CDO88511.1	1	0	118	arginine repressor
BN973_02874	CDO88508.1	1	0	108	acetylglutamate kinase
BN973_02875	CDO88509.1	1	0	183	acetylornithine aminotransferase
BN973_02872	CDO88506.1	1	0	129	N-acetyl-gamma-glutamyl-phosphate reductase
BN973_02873	CDO88507.1	1	0	134	glutamate N-acetyltransferase/amino-acid acetyltransferase
BN973_02870	CDO88504.1	0	0	126	phenylalanyl-tRNA synthetase subunit beta
BN973_02871	CDO88505.1	0	0	118	hypothetical protein
BN973_02878	CDO88512.1	1	0	192	argininosuccinate synthase
BN973_02879	CDO88513.1	1	0	125	argininosuccinate lyase
BN973_02252	CDO87894.1	0	0	119	FHA domain-containing protein
BN973_02253	CDO87895.1	0	1	217	FHA domain-containing protein
BN973_02250	CDO87892.1	0	0	127	amidase
BN973_02251	CDO87893.1	0	0	159	marR-family protein transcriptional regulator
BN973_02256	CDO87898.1	0	0	199	CsbD family protein
BN973_02257	CDO87899.1	1	0	167	uridylate kinase PyrH
BN973_02254	CDO87896.1	0	0	140	acyltransferase domain-containing protein
BN973_02255	CDO87897.1	0	0	110	GlnR family transcriptional regulator
BN973_02258	CDO87900.1	1	0	211	ribosome recycling factor Frr
BN973_02259	CDO87901.1	0	0	144	phosphatidate cytidylyltransferase
BN973_04456	CDO90065.1	1	0	175	FolP2
BN973_04457	CDO90066.1	0	0	160	long-chain-acyl-CoA synthetase
BN973_03486	CDO89115.1	0	0	133	hydroxylase
BN973_04455	CDO90064.1	1	0	113	putative glucosyl-3-phosphoglycerate synthase
BN973_04452	CDO90061.1	0	0	272	hypothetical protein
BN973_04453	CDO90062.1	1	0	176	DNA-3-methyladenine glycosylase I TagA
BN973_04450	CDO90059.1	1	0	134	glucose-1-phosphate adenylyltransferase
BN973_04451	CDO90060.1	0	0	148	glycosyl transferase family protein
BN973_01756	CDO87403.1	0	1	130	oxidoreductase, short chain dehydrogenase/reductase
BN973_01757	CDO87404.1	0	0	115	sulfotransferase family protein
BN973_01754	CDO87401.1	0	0	101	short chain type dehydrogenase/reductase y4lA
BN973_01755	CDO87402.1	0	0	111	metallo-beta-lactamase superfamily protein
[truncated: 3,562 more rows]
