# Supplementary material
Source: publisher figshare collection journal article supplement (https://tandf.figshare.com/articles/dataset/_/7936865)
Supplement: Supplementary file 1 [file 1 › temi_a_12040023_sm0020.xlsx]

## Sheet: Sheet1
Supplementary Table S13. Transcript informations of of M. tuberculosis
Gene name	GeneBank id	Single_copy	RPKM	Description
Rv0239	CCP42968.1	0	167	Possible antitoxin VapB24
Rv0238	CCP42967.1	0	120	Possible transcriptional regulatory protein (probably TetR-family)
Rv1322	CCP44079.1	0	274	Conserved hypothetical protein
Rv1323	CCP44081.1	1	318	Probable acetyl-CoA acetyltransferase FadA4 (acetoacetyl-CoA thiolase)
Rv1324	CCP44082.1	0	296	Possible thioredoxin
Rv1321	CCP44078.1	1	90	Conserved hypothetical protein
Rv0231	CCP42959.1	0	42	Probable acyl-CoA dehydrogenase FadE4
Rv0233	CCP42961.1	0	1171	Ribonucleoside-diphosphate reductase (beta chain) NrdB (ribonucleotide reductase small chain)
Rv0232	CCP42960.1	0	818	Probable transcriptional regulatory protein (probably TetR/AcrR-family)
Rv1427c	CCP44186.1	0	45	Possible long-chain-fatty-acid--CoA ligase FadD12 (fatty-acid-CoA synthetase) (fatty-acid-CoA synthase)
Rv0042c	CCP42764.1	0	82	Possible transcriptional regulatory protein (probably MarR-family)
Rv2352c	CCP45140.1	0	139	PPE family protein PPE38
Rv0965c	CCP43714.1	0	57	Conserved hypothetical protein
Rv2928	CCP45731.1	0	44	Probable thioesterase TesA
Rv3908	CCP46737.1	1	115	Possible mutator protein MutT4
Rv1567c	CCP44331.1	0	42	Probable hypothetical membrane protein
Rv3534c	CCP46356.1	0	761	Probable 4-hydroxy-2-oxovalerate aldolase (HOA)
Rv2661c	CCP45459.1	0	76	Hypothetical protein
Rv3256c	CCP46075.1	0	114	Conserved protein
Rv0878c	CCP43626.1	0	86	PPE family protein PPE13
Rv0422c	CCP43153.1	1	84	Probable phosphomethylpyrimidine kinase ThiD (HMP-phosphate kinase) (HMP-P kinase)
Rv1871c	CCP44637.1	0	784	Conserved protein
Rv0455c	CCP43186.1	0	99	Conserved protein
Rv0927c	CCP43675.1	0	52	Probable short-chain type dehydrogenase/reductase
Rv0244c	CCP42973.1	1	92	Probable acyl-CoA dehydrogenase FadE5
Rv3310	CCP46129.1	0	36	Acid phosphatase (acid phosphomonoesterase) (phosphomonoesterase) (glycerophosphatase)
Rv3830c	CCP46659.1	0	42	Transcriptional regulatory protein (probably TetR-family)
Rv3770c	CCP46597.1	0	111	Hypothetical leucine rich protein
Rv3317	CCP46137.1	1	59	Probable succinate dehydrogenase (hydrophobic membrane anchor subunit) SdhD (succinic dehydrogenase) (fumarate reductase) (fumarate dehydrogenase) (fumaric hydrogenase)
Rv0179c	CCP42905.1	0	52	Possible lipoprotein LprO
Rv2456c	CCP45249.1	0	50	Probable conserved integral membrane transport protein
Rv3241c	CCP46060.1	1	67	Conserved protein
Rv1592c	CCP44356.1	0	133	Conserved hypothetical protein
Rv0978c	CCP43727.1	0	43	PE-PGRS family protein PE_PGRS17
Rv1328	CCP44086.1	0	72	Probable glycogen phosphorylase GlgP
Rv1524	CCP44288.1	0	42	Probable glycosyltransferase
Rv1525	CCP44289.1	0	54	Possible rhamnosyl transferase WbbL2
Rv0309	CCP43039.1	0	69	Possible conserved exported protein
Rv0308	CCP43038.1	0	45	Probable conserved integral membrane protein
Rv1520	CCP44284.1	0	48	Probable sugar transferase
Rv1253	CCP44009.1	0	78	Probable cold-shock DeaD-box protein A homolog DeaD (ATP-dependent RNA helicase dead homolog)
Rv0743c	CCP43488.1	0	45	Hypothetical protein
Rv0306	CCP43036.1	0	44	Putative oxidoreductase
Rv0301	CCP43031.1	0	107	Possible toxin VapC2
Rv0300	CCP43030.1	0	116	Possible antitoxin VapB2
Rv0303	CCP43033.1	0	50	Probable dehydrogenase/reductase
Rv0302	CCP43032.1	0	59	Probable transcriptional regulatory protein (probably TetR/AcrR-family)
Rv0125	CCP42850.1	0	133	Probable serine protease PepA (serine proteinase) (MTB32A)
Rv0124	CCP42849.1	0	68	PE-PGRS family protein PE_PGRS2
Rv0127	CCP42852.1	0	57	Maltokinase Mak
Rv0126	CCP42851.1	0	63	Trehalose synthase TreS
Rv2813	CCP45613.1	0	49	Conserved hypothetical protein
Rv2812	CCP45612.1	0	36	Probable transposase
Rv0123	CCP42848.1	0	108	Unknown protein
Rv0122	CCP42847.1	0	81	Hypothetical protein
Rv2878c	CCP45680.1	0	380	Soluble secreted antigen Mpt53 precursor
Rv0128	CCP42853.1	0	41	Probable conserved transmembrane protein
Rv2949c	CCP45753.1	0	56	Chorismate pyruvate lyase
Rv0237	CCP42966.1	0	39	Probable conserved lipoprotein LpqI
Rv2801A	CCP45601.1	0	59	Possible antitoxin MazE9
Rv3487c	CCP46309.1	0	101	Probable esterase/lipase LipF
Rv1587c	CCP44351.1	0	370	Partial REP13E12 repeat protein
Rv3780	CCP46609.1	1	116	Conserved protein
Rv3781	CCP46610.1	1	66	Probable O-antigen/lipopolysaccharide transport ATP-binding protein ABC transporter RfbE
Rv3782	CCP46611.1	1	92	UDP-galactofuranosyl transferase GlfT1
Rv3366	CCP46187.1	1	33	Probable tRNA/rRNA methylase SpoU (tRNA/rRNA methyltransferase)
Rv1326c	CCP44084.1	0	273	1,4-alpha-glucan branching enzyme GlgB (glycogen branching enzyme)
Rv1844c	CCP44610.1	1	175	Probable 6-phosphogluconate dehydrogenase Gnd1
Rv2978c	CCP45783.1	0	106	Probable transposase
Rv3788	CCP46617.1	0	57	Hypothetical protein
Rv2450c	CCP45243.1	0	45	Probable resuscitation-promoting factor RpfE
Rv0947c		0	42	Probable mycolyl transferase, pseudogene
Rv0380c	CCP43110.1	1	59	Possible RNA methyltransferase (RNA methylase)
Rv0753c	CCP43499.1	0	210	Probable methylmalonate-semialdehyde dehydrogenase MmsA (methylmalonic acid semialdehyde dehydrogenase) (MMSDH)
Rv2954c	CCP45758.1	0	68	Hypothetical protein
Rv2901c	CCP45703.1	1	363	Conserved protein
Rv2801c	CCP45600.1	0	69	Toxin MazF9
Rv2023c	CCP44795.1	0	35	Hypothetical protein
Rv1448c	CCP44207.1	0	252	Probable transaldolase Tal
Rv2269c	CCP45050.1	0	46	Hypothetical protein
Rv3234c	CCP46053.1	0	62	Putative triacylglycerol synthase (diacylglycerol acyltransferase) Tgs3
Rv2634c	CCP45432.1	0	62	PE-PGRS family protein PE_PGRS46
Rv0212c	CCP42940.1	0	77	Possible transcriptional regulatory protein NadR (probably AsnC-family)
Rv2398c	CCP45188.1	0	103	Probable sulfate-transport integral membrane protein ABC transporter CysW
Rv1282c	CCP44038.1	0	43	Probable oligopeptide-transport integral membrane protein ABC transporter OppC
Rv2210c	CCP44987.1	1	66	Branched-chain amino acid transaminase IlvE
Rv3737	CCP46564.1	0	78	Probable conserved transmembrane protein
Rv3833	CCP46662.1	0	81	Transcriptional regulatory protein (probably AraC-family)
Rv3259	CCP46078.1	1	61	Conserved hypothetical protein
Rv2221c	CCP44999.1	1	90	Glutamate-ammonia-ligase adenylyltransferase GlnE (glutamine-synthetase adenylyltransferase)
Rv3274c	CCP46093.1	1	87	Probable acyl-CoA dehydrogenase FadE25
Rv3731	CCP46558.1	0	43	Possible ATP-dependent DNA ligase LigC (polydeoxyribonucleotide synthase [ATP]) (polynucleotide ligase [ATP]) (sealase) (DNA repair protein) (DNA joinase)
Rv3254	CCP46073.1	0	39	Conserved hypothetical protein
Rv2658c	CCP45456.1	0	118	Possible prophage protein
Rv2795c	CCP45594.1	1	115	Conserved hypothetical protein
Rv0989c	CCP43739.1	0	56	Probable polyprenyl-diphosphate synthase GrcC2 (polyprenyl pyrophosphate synthetase)
Rv0020c	CCP42742.1	0	927	Conserved protein with FHA domain, FhaA
Rv2729c	CCP45527.1	0	157	Probable conserved integral membrane alanine valine and leucine rich protein
Rv3732	CCP46559.1	0	53	Conserved protein
Rv1505c	CCP44267.1	0	21	Conserved hypothetical protein
Rv2455c	CCP45248.1	0	800	Probable oxidoreductase (alpha subunit)
Rv0595c	CCP43334.1	0	49	Possible toxin VapC4
Rv0442c	CCP43173.1	0	87	PPE family protein PPE10
Rv2916c	CCP45718.1	1	94	Probable signal recognition particle protein Ffh (fifty-four homolog) (SRP protein)
Rv2718c	CCP45516.1	1	114	Probable transcriptional regulatory protein NrdR
Rv3331	CCP46152.1	0	46	Probable sugar-transport integral membrane protein SugI
Rv2719c	CCP45517.1	0	53	Possible conserved membrane protein
Rv1248c	CCP44004.1	1	136	Multifunctional alpha-ketoglutarate metabolic enzyme
Rv3298c	CCP46117.1	0	58	Possible esterase lipoprotein LpqC
Rv3334	CCP46155.1	0	96	Probable transcriptional regulatory protein (probably MerR-family)
Rv3337	CCP46158.1	0	79	Conserved hypothetical protein
Rv2551c	CCP45347.1	0	177	Conserved hypothetical protein
Rv3338	CCP46159.1	0	85	Conserved hypothetical protein
Rv3890c	CCP46719.1	0	40	ESAT-6 like protein EsxC (ESAT-6 like protein 11)
Rv2592c	CCP45388.1	1	53	Probable holliday junction DNA helicase RuvB
Rv2894c	CCP45696.1	1	45	Probable integrase/recombinase XerC
Rv0825c	CCP43573.1	0	65	Conserved protein
Rv0108c	CCP42833.1	0	321	Hypothetical protein
Rv2730	CCP45528.1	0	52	Hypothetical protein
Rv2816c	CCP45616.1	0	55	Conserved hypothetical protein
Rv0937c	CCP43685.1	0	52	DNA end-binding protein, Mku
Rv1111c	CCP43864.1	0	75	Conserved hypothetical protein
Rv2774c	CCP45573.1	0	51	Hypothetical protein
Rv2498c	CCP45292.1	0	833	Probable citrate (pro-3S)-lyase (beta subunit) CitE (citrase) (citratase) (citritase) (citridesmolase) (citrase aldolase)
Rv2510c	CCP45304.1	0	38	Conserved protein
Rv1272c	CCP44028.1	1	49	Probable drugs-transport transmembrane ATP-binding protein ABC transporter
Rv3458c	CCP46280.1	1	286	30S ribosomal protein S4 RpsD
Rv1935c	CCP44702.1	0	38	Possible enoyl-CoA hydratase EchA13 (enoyl hydrase) (unsaturated acyl-CoA hydratase) (crotonase)
Rv3619c	CCP46442.1	0	81	Putative ESAT-6 like protein EsxV (ESAT-6 like protein 1)
Rv1898	CCP44665.1	0	342	Conserved hypothetical protein
Rv1366A	CCP44125.1	0	64	Conserved protein
Rv1895	CCP44662.1	0	52	Possible dehydrogenase
Rv1892	CCP44659.1	0	257	Probable membrane protein
Rv1893	CCP44660.1	0	305	Conserved hypothetical protein
Rv1891	CCP44658.1	0	370	Conserved protein
Rv1254	CCP44010.1	0	52	Probable acyltransferase
Rv0749A	CCP43495.1	0	40	Hypothetical protein (fragment)
Rv2485c	CCP45279.1	0	36	Probable carboxylesterase LipQ
Rv1129c	CCP43883.1	0	102	Probable transcriptional regulator protein
Rv2677c	CCP45475.1	0	312	Probable protoporphyrinogen oxidase HemY (protoporphyrinogen-IX oxidase) (protoporphyrinogenase) (PPO)
Rv3602c	CCP46425.1	1	49	Pantoate--beta-alanine ligase PanC (pantothenate synthetase) (pantoate activating enzyme)
Rv1928c	CCP44695.1	0	82	Probable short-chain type dehydrogenase/reductase
Rv3425	CCP46247.1	0	42	PPE family protein PPE57
Rv3640c	CCP46463.1	0	27	Probable transposase
Rv1250	CCP44006.1	0	66	Probable drug-transport integral membrane protein
Rv1098c	CCP43851.1	1	45	Probable fumarase Fum (fumarate hydratase)
Rv3529c	CCP46351.1	0	96	Conserved hypothetical protein
Rv1523	CCP44287.1	0	42	Probable methyltransferase
Rv2585c	CCP45381.1	0	89	Possible conserved lipoprotein
Rv3608c	CCP46431.1	0	429	Dihydropteroate synthase 1 FolP (DHPS 1) (dihydropteroate pyrophosphorylase 1) (dihydropteroate diphosphorylase 1)
Rv1521	CCP44285.1	0	108	Probable fatty-acid-AMP ligase FadD25 (fatty-acid-AMP synthetase) (fatty-acid-AMP synthase)
Rv0459	CCP43192.1	0	61	Conserved hypothetical protein
Rv3887c	CCP46716.1	0	57	ESX conserved component EccD2. ESX-2 type VII secretion system protein. Probable transmembrane protein.
Rv0011c	CCP42733.1	1	116	Probable conserved transmembrane protein
Rv2318	CCP45105.1	0	34	Probable periplasmic sugar-binding lipoprotein UspC
Rv1995	CCP44767.1	0	51	Unknown protein
Rv2408	CCP45199.1	0	39	Possible PE family-related protein PE24
Rv0268c	CCP42997.1	0	128	Hypothetical protein
Rv1917c	CCP44684.1	0	77	PPE family protein PPE34
Rv2317	CCP45104.1	0	32	Probable sugar-transport integral membrane protein ABC transporter UspB
Rv2310	CCP45097.1	0	27	Possible excisionase
Rv2311	CCP45098.1	0	42	Conserved hypothetical protein
Rv2312	CCP45099.1	0	69	Hypothetical protein
Rv1259	CCP44015.1	0	39	Probable uracil DNA glycosylase, UdgB
Rv2080	CCP44855.1	0	89	Lipoprotein LppJ
Rv1399c	CCP44158.1	0	36	Probable non lipolytic carboxylesterase NlhH
Rv2614A	CCP45412.1	0	40	Conserved hypothetical protein
Rv2736c	CCP45534.1	0	55	Regulatory protein RecX
Rv1628c	CCP44392.1	0	332	Conserved protein
Rv3671c	CCP46494.1	0	76	Membrane-associated serine protease
Rv1529	CCP44293.1	0	42	Probable fatty-acid-AMP ligase FadD24 (fatty-acid-AMP synthetase) (fatty-acid-AMP synthase)
Rv2258c	CCP45039.1	0	44	Possible transcriptional regulatory protein
Rv3169	CCP45980.1	0	37	Conserved protein
Rv2804c	CCP45604.1	0	34	Hypothetical protein
Rv2605c	CCP45402.1	0	116	Probable acyl-CoA thioesterase II TesB2 (TEII)
Rv1982c	CCP44751.1	0	110	Possible toxin VapC36. Contains PIN domain.
Rv2798c	CCP45597.1	0	47	Conserved hypothetical protein
Rv0230c	CCP42958.1	0	61	Probable phosphotriesterase Php (parathion hydrolase) (PTE) (aryldialkylphosphatase) (paraoxonase) (a-esterase) (aryltriphosphatase) (paraoxon hydrolase)
Rv0093c	CCP42818.1	0	46	Probable conserved membrane protein
Rv1729c	CCP44495.1	0	59	Possible S-adenosylmethionine-dependent methyltransferase
Rv2467	CCP45260.1	1	62	Probable aminopeptidase N PepN (Lysyl aminopeptidase) (LYS-AP) (alanine aminopeptidase)
Rv2085	CCP44860.1	0	133	Conserved hypothetical protein
Rv3392c	CCP46213.1	0	35	Cyclopropane-fatty-acyl-phospholipid synthase 1 CmaA1 (cyclopropane fatty acid synthase) (CFA synthase) (cyclopropane mycolic acid synthase 1)
Rv2421c	CCP45212.1	1	72	Probable nicotinate-nucleotide adenylyltransferase NadD (deamido-NAD(+) pyrophosphorylase) (deamido-NAD(+) diphosphorylase) (nicotinate mononucleotide adenylyltransferase) (NAMN adenylyltransferase)
Rv2053c	CCP44826.1	0	393	Probable transmembrane protein FxsA
Rv3021c		0	55	PPE family protein PPE47
Rv2620c	CCP45418.1	0	1003	Probable conserved transmembrane protein
Rv2811	CCP45611.1	0	41	Conserved hypothetical protein
Rv1982A	CCP44752.1	0	163	Possible antitoxin VapB36
Rv2922A	CCP45725.1	0	86	Probable acylphosphatase AcyP (acylphosphate phosphohydrolase)
Rv3010c	CCP45816.1	0	123	Probable 6-phosphofructokinase PfkA (phosphohexokinase) (phosphofructokinase)
Rv3420c	CCP46242.1	0	215	Ribosomal-protein-alanine acetyltransferase RimI (acetylating enzyme for N-terminal of ribosomal protein S18)
Rv3840	CCP46669.1	0	71	Possible transcriptional regulatory protein
Rv3762c	CCP46589.1	0	39	Possible hydrolase
Rv2260	CCP45041.1	0	63	Conserved hypothetical protein
Rv2286c	CCP45068.1	0	39	Conserved hypothetical protein
Rv2263	CCP45044.1	0	51	Possible oxidoreductase
Rv2175c	CCP44952.1	0	96	Conserved regulatory protein
Rv2266	CCP45047.1	0	43	Probable cytochrome P450 124 Cyp124
Rv3493c	CCP46315.1	0	69	Conserved hypothetical Mce associated alanine and valine rich protein
Rv1799	CCP44565.1	0	42	Probable lipoprotein LppT
Rv1798	CCP44564.1	0	91	ESX conserved component EccA5. ESX-5 type VII secretion system protein.
Rv3750c	CCP46577.1	0	111	Possible excisionase
Rv2443	CCP45236.1	0	122	Probable C4-dicarboxylate-transport transmembrane protein DctA
Rv2601A	CCP45398.1	0	100	Possible antitoxin VapB41
Rv0204c	CCP42932.1	0	91	Probable conserved transmembrane protein
Rv1623c	CCP44387.1	0	451	Probable integral membrane cytochrome D ubiquinol oxidase (subunit I) CydA (cytochrome BD-I oxidase subunit I)
Rv1790	CCP44556.1	0	77	PPE family protein PPE27
Rv1672c	CCP44437.1	0	70	Probable conserved integral membrane transport protein
Rv1792		0	181	ESAT-6 like protein EsxM
Rv1795	CCP44561.1	0	87	ESX conserved component EccD5. ESX-5 type VII secretion system protein. Probable membrane protein.
Rv0656c	CCP43399.1	0	65	Possible toxin VapC6
Rv1797	CCP44563.1	0	232	ESX conserved component EccE5. ESX-5 type VII secretion system protein. Probable membrane protein.
Rv1796	CCP44562.1	0	148	Probable proline rich membrane-anchored mycosin MycP5 (serine protease) (subtilisin-like protease) (subtilase-like) (mycosin-5)
Rv2135c	CCP44910.1	1	78	Conserved protein
Rv2418c	CCP45209.1	0	48	Unknown protein
Rv3324A		0	34	Probable fragment of pterin-4-alpha-carbinolamine dehydratase MOAB3 (PHS) (4-alpha-hydroxy-tetrahydropterin dehydratase) (pterin-4-a-carbinolamine dehydratase) (phenylalanine hydroxylase-stimulating protein) (PHS) (pterin carbinolamine dehydratase) (PCD)
Rv2046	CCP44819.1	0	43	Probable lipoprotein LppI
Rv1158c	CCP43913.1	0	126	Conserved hypothetical ala-, pro-rich protein
Rv3759c	CCP46586.1	0	99	Possible osmoprotectant (glycine betaine/carnitine/choline/L-proline) binding lipoprotein ProX
Rv1062	CCP43813.1	0	154	Conserved hypothetical protein
Rv1061	CCP43812.1	0	54	Conserved protein
Rv1060	CCP43811.1	0	89	Unknown protein
Rv1959c	CCP44727.1	0	197	Possible toxin ParE1
Rv1066	CCP43817.1	0	895	Conserved hypothetical protein
Rv1065	CCP43816.1	0	1441	Conserved hypothetical protein
Rv3303c	CCP46122.1	0	140	NAD(P)H quinone reductase LpdA
Rv1174c	CCP43930.1	0	662	Low molecular weight T-cell antigen TB8.4
Rv0776c	CCP43523.1	0	65	Conserved hypothetical protein
Rv3700c	CCP46525.1	0	67	Conserved hypothetical protein
Rv1665	CCP44430.1	0	40	Chalcone synthase Pks11
Rv1664	CCP44429.1	0	53	Probable polyketide synthase Pks9
Rv1203c	CCP43959.1	0	42	Hypothetical protein
Rv1661	CCP44426.1	0	81	Probable polyketide synthase Pks7
Rv1660	CCP44425.1	0	86	Chalcone synthase Pks10
Rv1663	CCP44428.1	0	61	Probable polyketide synthase Pks17
Rv1662	CCP44427.1	0	60	Probable polyketide synthase Pks8
Rv1084	CCP43835.1	0	345	Conserved protein
Rv1087	CCP43838.1	0	59	PE-PGRS family protein PE_PGRS21
Rv1086	CCP43837.1	1	159	Short (C15) chain Z-isoprenyl diphosphate synthase (Z-FPP synthase) (Z-farnesyl diphosphate synthase) (Z-FPP synthetase) (Z-farnesyl diphosphate synthetase) (geranyltranstransferase) (farnesyl pyrophosphate synthetase)
Rv1083	CCP43834.1	0	316	Conserved hypothetical protein
Rv1082	CCP43833.1	1	270	Mycothiol conjugate amidase Mca (mycothiol S-conjugate amidase)
Rv3843c	CCP46672.1	0	595	Probable conserved transmembrane protein
Rv3037c	CCP45846.1	0	68	Conserved hypothetical protein
Rv1089	CCP43841.1	0	36	PE family protein PE10
Rv1088	CCP43840.1	0	26	PE family protein PE9
Rv1889c	CCP44656.1	0	51	Conserved hypothetical protein
Rv1486c	CCP44246.1	0	75	Conserved hypothetical protein
Rv1584c	CCP44348.1	0	419	Possible PhiRv1 phage protein
Rv1854c	CCP44620.1	1	185	Probable NADH dehydrogenase Ndh
Rv2948c	CCP45752.1	0	38	P-hydroxybenzoyl-AMP ligase FadD22
Rv2715	CCP45513.1	0	252	Possible hydrolase
Rv1843c	CCP44609.1	1	192	Probable inosine-5'-monophosphate dehydrogenase GuaB1(imp dehydrogenase) (IMPDH) (IMPD)
Rv2979c	CCP45784.1	0	88	Probable resolvase
Rv2982c	CCP45787.1	1	39	Probable glycerol-3-phosphate dehydrogenase [NAD(P)+] GpdA2 (NAD(P)H-dependent glycerol-3-phosphate dehydrogenase)
Rv0938	CCP43686.1	0	270	ATP dependent DNA ligase LigD (ATP dependent polydeoxyribonucleotide synthase) (thermostable DNA ligase) (ATP dependent polynucleotide ligase) (sealase) (DNA repair enzyme) (DNA joinase)
Rv0939	CCP43687.1	0	305	Possible bifunctional enzyme: 2-hydroxyhepta-2,4-diene-1,7-dioate isomerase (HHDD isomerase) + cyclase/dehydrase
Rv0387c	CCP43117.1	0	33	Conserved hypothetical protein
Rv3107c	CCP45917.1	0	41	Possible alkyldihydroxyacetonephosphate synthase AgpS (alkyl-DHAP synthase) (alkylglycerone-phosphate synthase)
Rv0934	CCP43682.1	0	55	Periplasmic phosphate-binding lipoprotein PstS1 (PBP-1) (PstS1)
Rv0935	CCP43683.1	0	57	Phosphate-transport integral membrane ABC transporter PstC1
Rv0933	CCP43681.1	0	42	Phosphate-transport ATP-binding protein ABC transporter PstB
Rv0930	CCP43678.1	0	323	Probable phosphate-transport integral membrane ABC transporter PstA1
Rv1409	CCP44168.1	1	110	Probable bifunctional riboflavin biosynthesis protein RibG : diaminohydroxyphosphoribosylaminopyrimidine deaminase (riboflavin-specific deaminase) + 5-amino-6-(5-phosphoribosylamino) uracil reductase (HTP reductase)
Rv1408	CCP44167.1	1	95	Probable ribulose-phosphate 3-epimerase Rpe (PPE) (R5P3E) (pentose-5-phosphate 3-epimerase)
Rv2955c	CCP45759.1	0	49	Conserved protein
Rv0946c	CCP43694.1	1	57	Probable glucose-6-phosphate isomerase Pgi (GPI) (phosphoglucose isomerase) (phosphohexose isomerase) (phi)
Rv1401	CCP44160.1	0	53	Possible membrane protein
Rv0165c	CCP42891.1	0	67	Probable transcriptional regulatory protein Mce1R (probably GntR-family)
Rv1402	CCP44161.1	0	46	Putative primosomal protein N' PriA (replication factor Y)
Rv1404	CCP44163.1	0	260	Probable transcriptional regulatory protein
Rv1407	CCP44166.1	0	88	Probable Fmu protein (sun protein)
Rv1406	CCP44165.1	1	188	Probable methionyl-tRNA formyltransferase Fmt
Rv3513c	CCP46335.1	0	109	Probable fatty-acid-CoA ligase FadD18 (fragment) (fatty-acid-CoA synthetase) (fatty-acid-CoA synthase)
Rv2040c	CCP44813.1	0	58	Probable sugar-transport integral membrane protein ABC transporter
Rv0227c	CCP42955.1	0	82	Probable conserved membrane protein
Rv1339	CCP44097.1	1	148	Conserved protein
Rv1338	CCP44096.1	1	174	Probable glutamate racemase MurI
Rv1337	CCP44095.1	0	261	Probable integral membrane protein
Rv1336	CCP44094.1	0	262	Cysteine synthase B CysM (CSASE B) (O-phosphoserine sulfhydrylase B) (O-phosphoserine (thiol)-lyase B)
Rv1335	CCP44093.1	0	291	Sulfur carrier protein CysO
Rv1334	CCP44092.1	0	247	Possible hydrolase
Rv1036c	CCP43787.1	0	38	Probable IS1560 transposase (fragment)
Rv1332	CCP44090.1	0	258	Probable transcriptional regulatory protein
Rv1331	CCP44089.1	1	197	Conserved hypothetical protein
Rv3783	CCP46612.1	1	76	Probable O-antigen/lipopolysaccharide transport integral membrane protein ABC transporter RfbD
Rv2690c	CCP45488.1	0	50	Probable conserved integral membrane alanine and valine and leucine rich protein
Rv3784	CCP46613.1	0	49	Possible dTDP-glucose 4,6-dehydratase
Rv1016c	CCP43766.1	0	37	Probable conserved lipoprotein LpqT
Rv3785	CCP46614.1	0	57	Hypothetical protein
Rv0688	CCP43431.1	0	133	Putative ferredoxin reductase
Rv3403c	CCP46225.1	0	89	Hypothetical protein
Rv0681	CCP43424.1	0	131	Probable transcriptional regulatory protein (possibly TetR-family)
Rv0682	CCP43425.1	1	382	30S ribosomal protein S12 RpsL
Rv0683	CCP43426.1	1	272	30S ribosomal protein S7 RpsG
Rv0684	CCP43427.1	0	156	Probable elongation factor G FusA1 (EF-G)
Rv0685	CCP43428.1	1	181	Probable iron-regulated elongation factor TU Tuf (EF-TU)
Rv0686	CCP43429.1	0	73	Probable membrane protein
Rv0687	CCP43430.1	0	126	Probable short-chain type dehydrogenase/reductase
Rv1535	CCP44299.1	0	30	Unknown protein
Rv1242	CCP43998.1	0	72	Possible toxin VapC33. Contains PIN domain.
Rv1241	CCP43997.1	0	61	Possible antitoxin VapB33
Rv1240	CCP43996.1	0	75	Probable malate dehydrogenase Mdh
Rv1531	CCP44295.1	0	41	Conserved protein
Rv1530	CCP44294.1	0	46	Probable alcohol dehydrogenase Adh
Rv1533	CCP44297.1	0	52	Conserved protein
Rv0153c	CCP42878.1	0	53	Phosphotyrosine protein phosphatase PTPB (protein-tyrosine-phosphatase) (PTPase)
Rv0331	CCP43061.1	0	41	Possible dehydrogenase/reductase
Rv0332	CCP43062.1	0	60	Conserved protein
Rv0333	CCP43063.1	0	52	Unknown protein
Rv0334	CCP43064.1	1	40	Alpha-D-glucose-1-phosphate thymidylyltransferase RmlA (dTDP-glucose synthase) (dTDP-glucose pyrophosphorylase)
Rv0336	CCP43066.1	0	264	Conserved 13E12 repeat family protein
Rv0110	CCP42835.1	0	40	Probable conserved integral membrane protein
Rv0111	CCP42836.1	0	37	Possible transmembrane acyltransferase
Rv0543c	CCP43281.1	0	186	Conserved protein
Rv0113	CCP42838.1	0	35	Probable sedoheptulose-7-phosphate isomerase GmhA (phosphoheptose isomerase)
Rv0114	CCP42839.1	0	29	Possible D-alpha,beta-D-heptose-1,7-biphosphate phosphatase GmhB (D-glycero-D-manno-heptose 7-phosphate kinase)
Rv0115	CCP42840.1	0	36	Possible D-alpha-D-heptose-7-phosphate kinase HddA
Rv0117	CCP42842.1	0	35	Oxidative stress response regulatory protein OxyS
Rv3557c	CCP46379.1	0	71	Transcriptional regulatory protein (probably TetR-family)
Rv0119	CCP42844.1	0	55	Probable fatty-acid-CoA ligase FadD7 (fatty-acid-CoA synthetase) (fatty-acid-CoA synthase)
Rv0412c	CCP43143.1	0	469	Possible conserved membrane protein
Rv2319c	CCP45106.1	0	52	Universal stress protein family protein
Rv3811	CCP46640.1	0	90	Conserved hypothetical protein
Rv2362c	CCP45150.1	1	66	Possible DNA repair protein RecO
Rv0868c	CCP43616.1	0	59	Probable molybdenum cofactor biosynthesis protein D 2 MoaD2 (molybdopterin converting factor small subunit) (molybdopterin [MPT] converting factor, subunit 1)
Rv3299c	CCP46118.1	0	70	Probable arylsulfatase AtsB (aryl-sulfate sulphohydrolase) (sulfatase)
Rv3891c	CCP46720.1	0	64	Possible ESAT-6 like protein EsxD
Rv0365c	CCP43095.1	0	64	Conserved protein
Rv0330c	CCP43060.1	0	40	Hypothetical protein
Rv0822c	CCP43570.1	0	160	Conserved protein
Rv3257c	CCP46076.1	1	147	Probable phosphomannomutase PmmA (PMM) (phosphomannose mutase)
Rv3798	CCP46627.1	0	203	Probable transposase
Rv3797	CCP46626.1	0	35	Probable acyl-CoA dehydrogenase FadE35
Rv3796	CCP46625.1	0	44	Conserved protein
Rv3795	CCP46624.1	0	45	Integral membrane indolylacetylinositol arabinosyltransferase EmbB (arabinosylindolylacetylinositol synthase)
Rv3794	CCP46623.1	0	50	Integral membrane indolylacetylinositol arabinosyltransferase EmbA (arabinosylindolylacetylinositol synthase)
Rv2820c	CCP45620.1	0	41	Hypothetical protein
Rv2593c	CCP45389.1	1	57	Probable holliday junction DNA helicase RuvA
Rv2897c	CCP45699.1	0	54	Conserved hypothetical protein
Rv3790	CCP46619.1	1	42	Decaprenylphosphoryl-beta-D-ribose 2'-oxidase
Rv0205	CCP42933.1	0	47	Probable conserved transmembrane protein
Rv0754	CCP43500.1	0	164	PE-PGRS family protein PE_PGRS11
Rv0200	CCP42928.1	0	94	Possible conserved transmembrane protein
Rv0750	CCP43496.1	0	114	Conserved hypothetical protein
Rv0203	CCP42931.1	0	77	Possible exported protein
Rv2033c	CCP44806.1	0	52	Conserved hypothetical protein
Rv1446c	CCP44205.1	1	174	Putative OXPP cycle protein OpcA
Rv2819c	CCP45619.1	0	39	Hypothetical protein
Rv0209	CCP42937.1	0	41	Hypothetical protein
Rv0758	CCP43505.1	0	139	Possible two component system response sensor kinase membrane associated PhoR
Rv2868c	CCP45670.1	0	410	Probable GcpE protein
Rv2762c	CCP45561.1	0	85	Conserved hypothetical protein
Rv3591c	CCP46414.1	0	31	Possible hydrolase
Rv2689c	CCP45487.1	0	49	Conserved alanine and valine and glycine rich protein
Rv0043c	CCP42765.1	0	81	Probable transcriptional regulatory protein (probably GntR-family)
Rv0509	CCP43246.1	1	322	Probable glutamyl-tRNA reductase HemA (GLUTR)
Rv3213c	CCP46029.1	0	194	Possible SOJ/para-related protein
Rv0979A	CCP43729.1	1	63	50S ribosomal protein L32 RpmF
Rv2353c	CCP45141.1	0	51	PPE family protein PPE39
Rv3130c	CCP45940.1	0	2109	Triacylglycerol synthase (diacylglycerol acyltransferase) Tgs1
Rv0964c	CCP43713.1	0	39	Hypothetical protein
Rv0423c	CCP43154.1	0	138	Probable thiamine biosynthesis protein ThiC
Rv3575c	CCP46398.1	0	46	Transcriptional regulatory protein (probably LacI-family)
Rv0926c	CCP43674.1	0	40	Conserved hypothetical protein
Rv3597c	CCP46420.1	1	111	Iron-regulated H-NS-like protein Lsr2
Rv3922c	CCP46751.1	0	112	Possible hemolysin
Rv3240c	CCP46059.1	1	143	Probable preprotein translocase SecA1 1 subunit
Rv1071c	CCP43822.1	1	43	Possible enoyl-CoA hydratase EchA9 (enoyl hydrase) (unsaturated acyl-CoA hydratase) (crotonase)
Rv1838c	CCP44604.1	0	80	Possible toxin VapC13
Rv2837c	CCP45638.1	0	215	Conserved protein
Rv2584c	CCP45380.1	0	150	Adenine phosphoribosyltransferase Apt (APRT) (AMP diphosphorylase) (AMP pyrophosphorylase) (transphosphoribosidase)
Rv0979c	CCP43728.1	0	33	Hypothetical protein
Rv1018c	CCP43768.1	1	66	Probable UDP-N-acetylglucosamine pyrophosphorylase GlmU
Rv2453c	CCP45246.1	0	106	Probable molybdopterin-guanine dinucleotide biosynthesis protein A MobA
Rv1058	CCP43809.1	0	39	Probable medium chain fatty-acid-CoA ligase FadD14 (fatty-acid-CoA synthetase) (fatty-acid-CoA synthase)
Rv0269c	CCP42998.1	0	57	Conserved hypothetical protein
Rv0500	CCP43235.1	0	58	Probable pyrroline-5-carboxylate reductase ProC (P5CR) (P5C reductase)
Rv3899c	CCP46728.1	0	39	Conserved hypothetical protein
Rv2200c	CCP44977.1	1	93	Probable transmembrane cytochrome C oxidase (subunit II) CtaC
Rv3628	CCP46451.1	1	53	Inorganic pyrophosphatase Ppa (pyrophosphate phospho-hydrolase) (PPASE) (inorganic diphosphatase) (diphosphate phospho-hydrolase)
Rv3228	CCP46047.1	1	119	Conserved hypothetical protein
Rv3886c	CCP46715.1	0	72	Probable alanine and proline rich membrane-anchored mycosin MycP2 (serine protease) (subtilisin-like protease) (subtilase-like) (mycosin-2)
Rv2737A	CCP45536.1	0	54	Conserved hypothetical cysteine rich protein (fragment)
Rv3308	CCP46127.1	0	59	Probable phosphomannomutase PmmB (phosphomannose mutase)
Rv0327c	CCP43057.1	0	40	Possible cytochrome P450 135A1 Cyp135A1
Rv1135A	CCP43890.1	0	19	Possible acetyl-CoA acetyltransferase (acetoacetyl-CoA thiolase)
Rv0779c	CCP43526.1	0	28	Possible conserved transmembrane protein
Rv3307	CCP46126.1	1	89	Probable purine nucleoside phosphorylase DeoD (inosine phosphorylase) (PNP)
Rv1243c	CCP43999.1	0	45	PE-PGRS family protein PE_PGRS23
Rv2717c	CCP45515.1	0	47	Conserved protein
Rv3889c	CCP46718.1	0	58	ESX-2 secretion-associated protein EspG2
Rv0010c	CCP42732.1	0	155	Probable conserved membrane protein
Rv2737c	CCP45535.1	1	59	RecA protein (recombinase A) [contains: endonuclease PI-MTUI (MTU RecA intein)].
Rv1886c	CCP44652.1	0	49	Secreted antigen 85-B FbpB (85B) (antigen 85 complex B) (mycolyl transferase 85B) (fibronectin-binding protein B) (extracellular alpha-antigen)
Rv1245c	CCP44001.1	0	114	Probable short-chain type dehydrogenase/reductase
Rv1135c	CCP43889.1	0	72	PPE family protein PPE16
Rv1398c	CCP44157.1	0	1936	Possible antitoxin VapB10
Rv2401	CCP45191.1	0	72	Hypothetical protein
Rv3680	CCP46504.1	1	225	Probable anion transporter ATPase
Rv2089c	CCP44864.1	0	42	Dipeptidase PepE
Rv2019	CCP44791.1	0	33	Conserved protein
Rv1258c	CCP44014.1	0	35	Probable conserved integral membrane transport protein
Rv2018	CCP44790.1	0	52	Conserved protein
Rv3749c	CCP46576.1	0	74	Conserved hypothetical protein
Rv2825c	CCP45625.1	0	150	Conserved hypothetical protein
Rv2399c	CCP45189.1	0	106	Probable sulfate-transport integral membrane protein ABC transporter CysT
Rv3503c	CCP46325.1	0	280	Probable ferredoxin FdxD
Rv1887	CCP44653.1	0	141	Hypothetical protein
Rv3275c	CCP46094.1	1	100	Probable phosphoribosylaminoimidazole carboxylase catalytic subunit PurE (air carboxylase) (AIRC)
Rv1698	CCP44463.1	0	36	Outer membrane protein MctB
Rv3013	CCP45819.1	1	50	Conserved protein
Rv3016	CCP45822.1	0	75	Probable lipoprotein LpqA
Rv2012	CCP44784.1	0	44	Conserved hypothetical protein
Rv0021c	CCP42743.1	0	63	Conserved hypothetical protein
Rv1103c	CCP43856.1	0	207	Possible antitoxin MazE3
Rv2657c	CCP45455.1	0	160	Probable PhiRv2 prophage protein
Rv2488c	CCP45282.1	0	48	Probable transcriptional regulatory protein (LuxR-family)
Rv2726c	CCP45524.1	0	267	Probable diaminopimelate epimerase DapF (DAP epimerase)
Rv1622c	CCP44386.1	0	525	Probable integral membrane cytochrome D ubiquinol oxidase (subunit II) CydB (cytochrome BD-I oxidase subunit II)
Rv2161c	CCP44938.1	0	3560	Conserved protein
Rv0488	CCP43222.1	0	65	Probable conserved integral membrane protein
Rv3483c	CCP46305.1	0	50	Possible exported protein
Rv1673c	CCP44438.1	0	31	Conserved hypothetical protein
Rv3705A	CCP46531.1	0	54	Conserved hypothetical proline rich protein
Rv1820	CCP44586.1	0	70	Probable acetolactate synthase IlvG (acetohydroxy-acid synthase)(ALS)
Rv1735c	CCP44501.1	0	235	Hypothetical membrane protein
Rv2129c	CCP44904.1	0	103	Probable oxidoreductase
Rv3605c	CCP46428.1	0	189	Probable conserved secreted protein
Rv2308	CCP45094.1	0	37	Conserved hypothetical protein
Rv2404c	CCP45195.1	1	46	Probable GTP-binding protein LepA (GTP-binding elongation factor)
Rv2192c	CCP44969.1	0	314	Probable anthranilate phosphoribosyltransferase TrpD
Rv2024c	CCP44797.1	0	48	Conserved hypothetical protein
Rv1990A	CCP44761.1	0	71	Possible dehydrogenase (fragment)
Rv2301	CCP45083.1	0	73	Probable cutinase Cut2
Rv3758c	CCP46585.1	0	80	Possible osmoprotectant (glycine betaine/carnitine/choline/L-proline) transport ATP-binding protein ABC transporter ProV
Rv2305	CCP45087.1	0	41	Unknown protein
Rv1958c	CCP44726.1	0	257	Hypothetical protein
Rv3705c	CCP46530.1	0	53	Conserved protein
Rv0483	CCP43217.1	0	209	Probable conserved lipoprotein LprQ
Rv3492c	CCP46314.1	0	69	Conserved hypothetical Mce associated protein
Rv3660c	CCP46483.1	0	71	Conserved hypothetical protein
Rv0484c	CCP43218.1	0	68	Probable short-chain type oxidoreductase
Rv0493c	CCP43228.1	0	39	Conserved protein
Rv3878	CCP46707.1	0	198	ESX-1 secretion-associated protein EspJ. Conserved alanine rich protein.
Rv3872	CCP46701.1	0	423	PE family-related protein PE35
Rv1273c	CCP44029.1	0	38	Probable drugs-transport transmembrane ATP-binding protein ABC transporter
Rv3870	CCP46699.1	0	623	ESX conserved component EccCa1. ESX-1 type VII secretion system protein. Possible transmembrane protein.
Rv3871	CCP46700.1	0	494	ESX conserved component EccCb1. ESX-1 type VII secretion system protein.
Rv0677c	CCP43420.1	0	951	Possible conserved membrane protein MmpS5
Rv3877	CCP46706.1	0	77	ESX conserved component EccD1. ESX-1 type VII secretion system protein. Probable transmembrane protein.
Rv3874	CCP46703.1	0	1567	10 kDa culture filtrate antigen EsxB (LHP) (CFP10)
Rv1178	CCP43934.1	1	876	Probable aminotransferase
Rv2110c	CCP44885.1	1	236	Proteasome beta subunit PrcB; assembles with alpha subunit PrcA.
Rv3687c	CCP46511.1	0	41	Anti-anti-sigma factor RsfB (anti-sigma factor antagonist) (regulator of sigma F B)
Rv1934c	CCP44701.1	0	45	Probable acyl-CoA dehydrogenase FadE17
Rv2528c	CCP45322.1	0	45	Probable restriction system protein Mrr
Rv2276	CCP45058.1	0	38	Cytochrome P450 121 Cyp121
Rv2275	CCP45057.1	0	50	Conserved hypothetical protein
Rv1976c	CCP44745.1	0	91	Conserved hypothetical protein
Rv2273	CCP45054.1	0	35	Probable conserved transmembrane protein
Rv2272	CCP45053.1	0	58	Probable conserved transmembrane protein
Rv2271	CCP45052.1	0	91	Conserved hypothetical protein
Rv2270	CCP45051.1	0	27	Probable lipoprotein LppN
Rv3552	CCP46374.1	0	69	Possible CoA-transferase (beta subunit)
Rv3617	CCP46440.1	0	44	Probable epoxide hydrolase EphA (epoxide hydratase) (arene-oxide hydratase)
Rv2279	CCP45061.1	0	512	Probable transposase
Rv2278	CCP45060.1	0	513	Putative transposase for insertion sequence element IS6110 (fragment)
Rv3647c	CCP46470.1	1	78	Conserved hypothetical protein
Rv0891c	CCP43639.1	0	41	Possible transcriptional regulatory protein
Rv1929c	CCP44696.1	0	102	Conserved hypothetical protein
Rv2615c	CCP45413.1	0	75	PE-PGRS family protein PE_PGRS45
Rv1367c	CCP44126.1	0	69	Conserved protein
Rv3313c	CCP46133.1	0	35	Probable adenosine deaminase Add (adenosine aminohydrolase)
Rv1099c	CCP43852.1	1	60	Fructose 1,6-bisphosphatase GlpX
Rv2972c	CCP45777.1	0	38	Possible conserved membrane or exported protein
Rv2459	CCP45252.1	0	66	Probable conserved integral membrane transport protein
Rv2458	CCP45251.1	0	34	Probable homocysteine S-methyltransferase MmuM (S-methylmethionine:homocysteine methyltransferase) (cysteine methyltransferase)
Rv3598c	CCP46421.1	1	42	Lysyl-tRNA synthetase 1 LysS (lysine--tRNA ligase 1) (LysRS 1) (lysine translase)
Rv2041c	CCP44814.1	0	55	Probable sugar-binding lipoprotein
Rv2451	CCP45244.1	0	49	Hypothetical proline and serine rich protein
Rv1037c	CCP43788.1	0	74	Putative ESAT-6 like protein EsxI (ESAT-6 like protein 1)
Rv2697c	CCP45495.1	1	110	Probable deoxyuridine 5'-triphosphate nucleotidohydrolase Dut (dUTPase) (dUTP pyrophosphatase) (deoxyuridine 5'-triphosphatase) (dUTP diphosphatase) (deoxyuridine-triphosphatase)
Rv0069c	CCP42792.1	0	36	Probable L-serine dehydratase SdaA (L-serine deaminase) (SDH) (L-SD)
Rv2694c	CCP45492.1	0	356	Conserved protein
Rv1017c	CCP43767.1	1	63	Probable ribose-phosphate pyrophosphokinase PrsA (phosphoribosyl pyrophosphate synthetase) (PRPP synthetase)
Rv3434c	CCP46256.1	0	67	Possible conserved transmembrane protein
Rv3423c	CCP46245.1	0	124	Alanine racemase Alr
Rv2050	CCP44823.1	1	263	Conserved protein
Rv3020c	CCP45827.1	0	43	ESAT-6 like protein EsxS
Rv2054	CCP44827.1	0	48	Conserved protein
Rv2059	CCP44832.1	0	64	Conserved hypothetical protein
Rv1220c	CCP43976.1	1	60	Probable methyltransferase
Rv1658	CCP44423.1	1	529	Probable argininosuccinate synthase ArgG
Rv1659	CCP44424.1	1	195	Probable argininosuccinate lyase ArgH
Rv0150c	CCP42875.1	0	69	Conserved hypothetical protein
Rv2415c	CCP45206.1	0	38	Conserved hypothetical protein
Rv3860	CCP46689.1	0	58	Conserved protein
Rv1650	CCP44415.1	0	55	Probable phenylalanyl-tRNA synthetase, beta chain PheT
Rv1102c	CCP43855.1	0	270	Toxin MazF3
Rv1652	CCP44417.1	1	310	Probable N-acetyl-gamma-glutamyl-phoshate reductase ArgC
Rv1653	CCP44418.1	1	876	Probable glutamate N-acetyltransferase ArgJ
Rv1654	CCP44419.1	1	995	Probable acetylglutamate kinase ArgB
Rv1655	CCP44420.1	1	1001	Probable acetylornithine aminotransferase ArgD
Rv1656	CCP44421.1	1	689	Probable ornithine carbamoyltransferase, anabolic ArgF
Rv1657	CCP44422.1	1	407	Probable arginine repressor ArgR (AHRC)
Rv3578	CCP46401.1	0	51	Possible arsenical pump integral membrane protein ArsB2
Rv3379c	CCP46200.1	0	32	Probable 1-deoxy-D-xylulose 5-phosphate synthase Dxs2 (1-deoxyxylulose-5-phosphate synthase) (DXP synthase) (DXPS)
Rv0642c	CCP43385.1	0	103	Methoxy mycolic acid synthase 4 MmaA4 (methyl mycolic acid synthase 4) (MMA4) (hydroxy mycolic acid synthase)
Rv0143c	CCP42868.1	0	67	Probable conserved transmembrane protein
Rv1635c	CCP44399.1	0	113	Probable mannosyltransferase. Probable conserved transmembrane protein.
Rv3865	CCP46694.1	0	574	ESX-1 secretion-associated protein EspF
Rv3581c	CCP46404.1	1	761	Probable 2C-methyl-D-erythritol 2,4-cyclodiphosphate synthase IspF (MECPS)
Rv3807c	CCP46636.1	1	140	Possible conserved transmembrane protein
Rv3378c	CCP46199.1	0	22	Diterpene synthase
Rv2052c	CCP44825.1	0	382	Conserved protein
Rv3532	CCP46354.1	0	56	PPE family protein PPE61
Rv2907c	CCP45709.1	1	61	Probable 16S rRNA processing protein RimM
Rv1434	CCP44193.1	0	109	Hypothetical protein
Rv1436	CCP44195.1	0	128	Probable glyceraldehyde 3-phosphate dehydrogenase Gap (GAPDH)
Rv1437	CCP44196.1	1	83	Probable phosphoglycerate kinase Pgk
Rv0929	CCP43677.1	0	153	Phosphate-transport integral membrane ABC transporter PstC2
Rv0928	CCP43676.1	0	298	Periplasmic phosphate-binding lipoprotein PstS3 (PBP-3) (PstS3) (PHOS1)
Rv1432	CCP44191.1	0	52	Probable dehydrogenase
Rv1433	CCP44192.1	0	68	Possible conserved exported protein
Rv0433	CCP43164.1	0	49	Conserved hypothetical protein
Rv0432	CCP43163.1	0	94	Periplasmic superoxide dismutase [Cu-Zn] SodC
Rv0431	CCP43162.1	0	66	Putative tuberculin related peptide
Rv0430	CCP43161.1	1	72	Conserved hypothetical protein
Rv0921	CCP43669.1	0	84	Possible resolvase
Rv0922	CCP43670.1	0	154	Possible transposase
Rv3128c		0	454	Conserved hypothetical protein
Rv2698	CCP45496.1	0	85	Probable conserved alanine rich transmembrane protein
Rv3011c	CCP45817.1	1	45	Probable glutamyl-tRNA(GLN) amidotransferase (subunit A) GatA (Glu-ADT subunit A)
Rv2172c	CCP44949.1	1	107	Conserved protein
Rv3068c	CCP45877.1	0	40	Probable phosphoglucomutase PgmA (glucose phosphomutase) (PGM)
Rv2691	CCP45489.1	0	59	TRK system potassium uptake protein CeoB
Rv2409c	CCP45200.1	1	55	Conserved protein
Rv1348	CCP44106.1	0	48	Iron-regulated transporter IrtA
Rv0805	CCP43553.1	0	238	Class III cyclic nucleotide phosphodiesterase (cNMP PDE)
Rv3456c	CCP46278.1	1	329	50S ribosomal protein L17 RplQ
Rv2452c	CCP45245.1	0	50	Hypothetical protein
Rv3818	CCP46647.1	0	68	Unknown protein
Rv3224A	CCP46042.1	0	83	Conserved hypothetical protein
Rv1340	CCP44098.1	1	131	Probable ribonuclease RphA (RNase PH) (tRNA nucleotidyltransferase)
Rv1341	CCP44099.1	0	67	Conserved protein
Rv1346	CCP44104.1	0	60	Acyl-CoA dehydrogenase MbtN
Rv3491	CCP46313.1	0	101	Unknown protein
Rv1344	CCP44102.1	0	44	Acyl carrier protein (ACP) MbtL
Rv1345	CCP44103.1	0	63	Probable fatty acyl-AMP ligase MbtM
Rv0697	CCP43441.1	0	32	Probable dehydrogenase
Rv0696	CCP43440.1	0	50	Probable membrane sugar transferase
Rv0695	CCP43439.1	0	72	Conserved hypothetical protein
Rv0694	CCP43438.1	0	45	Possible L-lactate dehydrogenase (cytochrome) LldD1
Rv0693	CCP43437.1	0	60	Probable coenzyme PQQ synthesis protein E PqqE (coenzyme PQQ synthesis protein III)
Rv0692	CCP43436.1	0	71	Conserved hypothetical protein
Rv3476c	CCP46298.1	0	31	Probable dicarboxylic acid transport integral membrane protein KgtP (dicarboxylate transporter)
Rv0963c	CCP43712.1	0	30	Conserved hypothetical protein
Rv0932c	CCP43680.1	0	1308	Periplasmic phosphate-binding lipoprotein PstS2 (PBP-2) (PstS2)
Rv1288	CCP44044.1	0	63	Conserved protein
Rv3652	CCP46475.1	0	52	PE-PGRS family-related protein PE_PGRS60
Rv3536c	CCP46358.1	0	787	Probable hydratase
Rv0699	CCP43443.1	0	39	Hypothetical protein
Rv0698	CCP43442.1	0	41	Conserved hypothetical protein
Rv0326	CCP43056.1	0	38	Hypothetical protein
Rv0325	CCP43055.1	0	61	Hypothetical protein
Rv0324	CCP43054.1	0	67	Possible transcriptional regulatory protein (possibly ArsR-family)
Rv0322	CCP43052.1	0	39	Probable UDP-glucose 6-dehydrogenase UdgA (UDP-GLC dehydrogenase) (UDP-GLCDH) (UDPGDH)
Rv0321	CCP43051.1	1	57	Probable deoxycytidine triphosphate deaminase Dcd (dCTP deaminase)
Rv0320	CCP43050.1	0	26	Possible conserved exported protein
Rv0242c	CCP42971.1	1	191	Probable 3-oxoacyl-[acyl-carrier protein] reductase FabG4 (3-ketoacyl-acyl carrier protein reductase)
Rv1839c	CCP44605.1	0	62	Possible antitoxin VapB13
Rv3850	CCP46679.1	0	39	Conserved protein
Rv3923c	CCP46752.1	0	92	Ribonuclease P protein component RnpA (RNaseP protein) (RNase P protein) (protein C5)
Rv1472	CCP44231.1	0	85	Possible enoyl-CoA hydratase EchA12 (enoyl hydrase) (unsaturated acyl-CoA hydratase) (crotonase)
Rv0925c	CCP43673.1	0	40	Conserved protein
Rv0328	CCP43058.1	0	92	Possible transcriptional regulatory protein (possibly TetR/AcrR-family)
Rv1500	CCP44262.1	0	54	Probable glycosyltransferase
Rv1501	CCP44263.1	0	64	Conserved hypothetical protein
Rv1502	CCP44264.1	0	72	Hypothetical protein
Rv2836c	CCP45637.1	0	71	Possible DNA-damage-inducible protein F DinF
Rv1509	CCP44273.1	0	40	Hypothetical protein
Rv2075c	CCP44849.1	0	53	Possible hypothetical exported or envelope protein
Rv2873	CCP45675.1	0	40	Cell surface lipoprotein Mpt83 (lipoprotein P23)
Rv2322c	CCP45109.1	0	71	Probable ornithine aminotransferase (N-terminus part) RocD1 (ornithine--oxo-acid aminotransferase)
Rv2875	CCP45677.1	0	59	Major secreted immunogenic protein Mpt70
Rv2874	CCP45676.1	0	52	Possible integral membrane C-type cytochrome biogenesis protein DipZ
Rv0109	CCP42834.1	0	52	PE-PGRS family protein PE_PGRS1
Rv2876	CCP45678.1	0	165	Possible conserved transmembrane protein
Rv0106	CCP42831.1	0	35	Conserved hypothetical protein
Rv1051c	CCP43802.1	0	30	Conserved hypothetical protein
Rv0102	CCP42827.1	0	54	Probable conserved integral membrane protein
Rv0101	CCP42826.1	0	63	Probable peptide synthetase Nrp (peptide synthase)
Rv0100	CCP42825.1	0	50	Conserved hypothetical protein
Rv1571	CCP44335.1	0	47	Conserved protein
Rv1498A	CCP44260.1	0	55	Conserved protein
Rv2201	CCP44978.1	1	53	Probable asparagine synthetase AsnB
Rv1450c	CCP44209.1	0	50	PE-PGRS family protein PE_PGRS27
Rv1570	CCP44334.1	0	52	Dethiobiotin synthetase BioD
Rv2830c	CCP45631.1	0	89	Possible antitoxin VapB22
Rv1888c	CCP44654.1	0	146	Possible transmembrane protein
Rv1467c	CCP44226.1	0	71	Probable acyl-CoA dehydrogenase FadE15
Rv1855c	CCP44621.1	0	129	Possible oxidoreductase
Rv1842c	CCP44608.1	0	338	Conserved hypothetical membrane protein
Rv3809c	CCP46638.1	1	63	UDP-galactopyranose mutase Glf (UDP-GALP mutase) (NAD+-flavin adenine dinucleotide-requiring enzyme)
Rv3330	CCP46151.1	0	47	Probable penicillin-binding protein DacB1 (D-alanyl-D-alanine carboxypeptidase) (DD-peptidase) (DD-carboxypeptidase) (PBP) (DD-transpeptidase) (serine-type D-ala-D-ala carboxypeptidase) (D-amino acid hydrolase)
Rv2976c	CCP45781.1	1	71	Probable uracil-DNA glycosylase Ung (UDG)
Rv2981c	CCP45786.1	1	62	Probable D-alanine--D-alanine ligase DdlA (D-alanylalanine synthetase) (D-ala-D-ala ligase)
Rv2140c	CCP44915.1	1	110	Conserved protein TB18.6
Rv0745	CCP43490.1	0	28	Conserved hypothetical protein
Rv0211	CCP42939.1	1	241	Probable iron-regulated phosphoenolpyruvate carboxykinase [GTP] PckA (phosphoenolpyruvate carboxylase) (PEPCK)(pep carboxykinase)
Rv0210	CCP42938.1	0	43	Hypothetical protein
Rv0741	CCP43486.1	0	94	Probable transposase (fragment)
Rv0216	CCP42944.1	0	38	Double hotdog hydratase
Rv3825c	CCP46654.1	0	74	Polyketide synthase Pks2
Rv0742	CCP43487.1	0	42	PE-PGRS family protein PE_PGRS8
Rv0219	CCP42947.1	0	49	Probable conserved transmembrane protein
Rv0218	CCP42946.1	0	43	Probable conserved transmembrane protein
Rv0749	CCP43494.1	0	65	Possible toxin VapC31. Contains PIN domain.
Rv0748	CCP43493.1	0	95	Possible antitoxin VapB31
Rv1888A	CCP44655.1	0	71	Conserved hypothetical protein
Rv3614c	CCP46437.1	0	1177	ESX-1 secretion-associated protein EspD
Rv1306	CCP44063.1	0	1116	Probable ATP synthase B chain AtpF
Rv0406c	CCP43137.1	0	40	Beta lactamase like protein
Rv2898c	CCP45700.1	0	53	Conserved hypothetical protein
Rv3232c	CCP46051.1	0	68	Polyphosphate kinase Ppk2 (polyphosphoric acid kinase)
Rv2267c	CCP45048.1	0	29	Conserved hypothetical protein
Rv1781c	CCP44548.1	0	47	Probable 4-alpha-glucanotransferase MalQ (amylomaltase) (disproportionating enzyme) (D-enzyme)
Rv3270	CCP46089.1	0	5467	Probable metal cation-transporting P-type ATPase C CtpC
Rv2347c	CCP45135.1	0	201	Putative ESAT-6 like protein EsxP (ESAT-6 like protein 7)
Rv3273	CCP46092.1	0	144	Probable transmembrane carbonic anhydrase (carbonate dehydratase) (carbonic dehydratase)
Rv2905	CCP45707.1	0	78	Probable conserved alanine rich lipoprotein LppW
Rv0834c	CCP43582.1	0	2094	PE-PGRS family protein PE_PGRS14
Rv0802c	CCP43550.1	0	47	Possible succinyltransferase in the GCN5-related N-acetyltransferase family
Rv2152c	CCP44928.1	1	417	Probable UDP-N-acetylmuramate-alanine ligase MurC
Rv3594	CCP46417.1	0	44	Conserved hypothetical protein
Rv3477	CCP46299.1	0	59	PE family protein PE31
Rv3474	CCP46296.1	0	518	Possible transposase for insertion element IS6110 (fragment)
Rv3475	CCP46297.1	0	512	Possible transposase for insertion element IS6110 [second part]
Rv3472	CCP46294.1	0	32	Conserved protein
Rv1579c	CCP44343.1	0	78	Probable PhiRv1 phage protein
Rv1429	CCP44188.1	0	52	Conserved protein
Rv0135c	CCP42860.1	0	153	Possible transcriptional regulatory protein
Rv3478	CCP46300.1	0	372	PE family protein PPE60
Rv3266c	CCP46085.1	0	134	dTDP-6-deoxy-L-lyxo-4-hexulose reductase RmlD (dTDP-rhamnose modification protein) (dTDP-rhamnose biosynthesis protein) (dTDP-rhamnose synthase)
Rv2309c	CCP45095.1	0	47	Possible integrase (fragment)
Rv1452c	CCP44211.1	0	45	PE-PGRS family protein PE_PGRS28
Rv3185	CCP45996.1	0	508	Probable transposase
Rv3193c	CCP46005.1	1	147	Probable conserved transmembrane protein
Rv1503c	CCP44265.1	0	46	Conserved hypothetical protein
Rv2656c	CCP45454.1	0	238	Possible PhiRv2 prophage protein
Rv3486	CCP46308.1	0	94	Conserved protein
Rv1445c	CCP44204.1	0	148	Probable 6-phosphogluconolactonase DevB (6PGL)
Rv1837c	CCP44603.1	1	509	Malate synthase G GlcB
Rv2361c	CCP45149.1	0	68	Long (C50) chain Z-isoprenyl diphosphate synthase (Z-decaprenyl diphosphate synthase)
Rv3556c	CCP46378.1	0	92	Probable acetyl-CoA acetyltransferase FadA6 (acetoacetyl-CoA thiolase)
Rv0542c	CCP43280.1	0	81	Possible O-succinylbenzoic acid--CoA ligase MenE (OSB-CoA synthetase) (O-succinylbenzoate-CoA synthase)
Rv0537c	CCP43275.1	0	119	Probable integral membrane protein
Rv0444c	CCP43175.1	0	118	Anti-sigma factor RskA (regulator of sigma K)
Rv3319	CCP46139.1	1	59	Probable succinate dehydrogenase (iron-sulphur protein subunit) SdhB (succinic dehydrogenase) (fumarate reductase) (fumarate dehydrogenase) (fumaric hydrogenase)
Rv3318	CCP46138.1	1	56	Probable succinate dehydrogenase (flavoprotein subunit) SdhA (succinic dehydrogenase) (fumarate reductase) (fumarate dehydrogenase) (fumaric hydrogenase)
Rv0974c	CCP43723.1	0	269	Probable acetyl-/propionyl-CoA carboxylase (beta subunit) AccD2
Rv0411c	CCP43142.1	1	629	Probable glutamine-binding lipoprotein GlnH (GLNBP)
Rv3311	CCP46130.1	0	42	Conserved protein
Rv1565c	CCP44329.1	0	45	Conserved hypothetical membrane protein
Rv3221c	CCP46037.1	1	151	Biotinylated protein TB7.3
Rv0869c	CCP43617.1	0	118	Probable molybdenum cofactor biosynthesis protein A2 MoaA2
Rv3250c	CCP46069.1	0	309	Probable rubredoxin RubB
Rv0985c	CCP43735.1	0	258	Possible large-conductance ion mechanosensitive channel MscL
Rv0823c	CCP43571.1	1	501	Possible transcriptional regulatory protein
Rv0273c	CCP43002.1	0	154	Possible transcriptional regulatory protein
Rv2594c	CCP45390.1	1	55	Probable crossover junction endodeoxyribonuclease RuvC (holliday junction nuclease) (holliday junction resolvase)
Rv2896c	CCP45698.1	0	59	Conserved hypothetical protein
Rv3520c	CCP46342.1	0	119	Possible coenzyme F420-dependent oxidoreductase
Rv2329c	CCP45116.1	0	57	Probable nitrite extrusion protein 1 NarK1 (nitrite facilitator 1)
Rv2821c	CCP45621.1	0	43	Conserved hypothetical protein
Rv2441c	CCP45234.1	1	206	50S ribosomal protein L27 RpmA
Rv3188	CCP45999.1	0	73	Conserved hypothetical protein
Rv3394c	CCP46215.1	0	70	Conserved hypothetical protein
Rv2776c	CCP45575.1	0	85	Probable oxidoreductase
Rv3221A	CCP46038.1	0	249	Anti-sigma factor RshA
Rv2818c	CCP45618.1	0	32	Hypothetical protein
Rv3915	CCP46744.1	1	133	Probable peptidoglycan hydrolase
Rv0492c	CCP43226.1	0	123	Probable oxidoreductase GMC-type
Rv1991c	CCP44762.1	0	127	Toxin MazF6
Rv1364c	CCP44122.1	0	116	Possible sigma factor regulatory protein
Rv2512c	CCP45306.1	0	217	Transposase for insertion sequence element IS1081
Rv0676c	CCP43419.1	0	521	Probable conserved transmembrane transport protein MmpL5
Rv3006	CCP45812.1	1	65	Probable conserved lipoprotein LppZ
Rv1836c	CCP44602.1	0	423	Conserved protein
Rv2111c	CCP44886.1	1	367	Prokaryotic ubiquitin-like protein Pup
Rv0815c	CCP43563.1	0	374	Probable thiosulfate sulfurtransferase CysA2 (rhodanese-like protein) (thiosulfate cyanide transsulfurase) (thiosulfate thiotransferase)
Rv3000	CCP45806.1	0	35	Possible conserved transmembrane protein
Rv1933c	CCP44700.1	0	66	Probable acyl-CoA dehydrogenase FadE18
Rv0616c	CCP43356.1	0	151	Hypothetical protein
Rv1962c	CCP44730.1	0	70	Possible toxin VapC35. Contains PIN domain.
Rv3312A	CCP46132.1	0	84	Secreted protein antigen
Rv3008	CCP45814.1	0	77	Hypothetical protein
Rv0492A	CCP43227.1	0	49	Hypothetical protein
Rv1540	CCP44304.1	1	383	Conserved hypothetical protein member of yabO/yceC/yfiI family
Rv1902c	CCP44669.1	0	50	Probable sialic acid-transport integral membrane protein NanT
Rv3460c	CCP46282.1	1	453	30S ribosomal protein S13 RpsM
Rv2614c	CCP45411.1	1	120	Probable threonyl-tRNA synthetase ThrS (threonine-tRNA synthetase)(ThrRS) (threonine-tRNA ligase)
Rv3646c	CCP46469.1	1	81	DNA topoisomerase I TopA (omega-protein) (relaxing enzyme) (untwisting enzyme) (swivelase) (type I DNA topoisomerase) (nicking-closing enzyme) (TOPO I)
Rv2249c	CCP45029.1	0	39	Probable glycerol-3-phosphate dehydrogenase GlpD1
Rv1962A	CCP44731.1	0	63	Possible antitoxin VapB35
Rv3312c	CCP46131.1	0	45	Conserved hypothetical protein
Rv0616A	CCP43357.1	0	184	Possible antitoxin VapB29
Rv0890c	CCP43638.1	0	36	Probable transcriptional regulatory protein (probably LuxR-family)
Rv3626c	CCP46449.1	0	677	Conserved hypothetical protein
Rv0346c	CCP43076.1	0	55	Possible L-asparagine permease AnsP2 (L-asparagine transport protein)
Rv2589	CCP45385.1	0	208	4-aminobutyrate aminotransferase GabT (gamma-amino-N-butyrate transaminase) (GABA transaminase) (glutamate:succinic semialdehyde transaminase) (GABA aminotransferase) (GABA-at)
Rv3698	CCP46523.1	0	44	Conserved protein
Rv1447c	CCP44206.1	0	212	Probable glucose-6-phosphate 1-dehydrogenase Zwf2 (G6PD)
Rv3699	CCP46524.1	0	97	Conserved protein
Rv2900c	CCP45702.1	0	274	Possible formate dehydrogenase H FdhF (formate-hydrogen-lyase-linked, selenocysteine-containing polypeptide) (formate dehydrogenase-H alpha subunit) (FDH-H)
Rv0790c	CCP43538.1	0	79	Hypothetical protein
Rv2572c	CCP45368.1	1	66	Probable aspartyl-tRNA synthetase AspS (aspartate--tRNA ligase) (ASPRS) (aspartic acid translase)
Rv2505c	CCP45299.1	0	42	Probable fatty-acid-CoA ligase FadD35 (fatty-acid-CoA synthetase) (fatty-acid-CoA synthase)
Rv2073c	CCP44847.1	0	40	Probable shortchain dehydrogenase
Rv0017c	CCP42739.1	1	213	Probable cell division protein RodA
Rv3381c	CCP46202.1	0	520	Probable transposase for insertion sequence element IS6110 (fragment)
Rv1911c	CCP44678.1	0	132	Probable lipoprotein LppC
Rv3692	CCP46516.1	0	71	Probable methanol dehydrogenase transcriptional regulatory protein MoxR2
Rv0385	CCP43115.1	0	40	Probable monooxygenase
Rv1532c	CCP44296.1	0	36	Conserved hypothetical protein
Rv3416	CCP46238.1	1	491	Transcriptional regulatory protein WhiB-like WhiB3. Contains [4FE-4S] cluster.
Rv2738c	CCP45537.1	1	72	Conserved hypothetical protein
Rv3690	CCP46514.1	0	45	Probable conserved membrane protein
Rv2411c	CCP45202.1	1	62	Conserved hypothetical protein
Rv3869	CCP46698.1	0	396	ESX conserved component EccB1. ESX-1 type VII secretion system protein. Possible membrane protein.
Rv0634c	CCP43375.1	0	101	Possible glyoxalase II (hydroxyacylglutathione hydrolase) (GLX II)
Rv1980c	CCP44749.1	0	196	Immunogenic protein Mpt64 (antigen Mpt64/MPB64)
Rv1347c	CCP44105.1	0	43	Lysine N-acetyltransferase MbtK
Rv0643c	CCP43386.1	0	47	Methoxy mycolic acid synthase 3 MmaA3 (methyl mycolic acid synthase 3) (MMA3) (hydroxy mycolic acid synthase)
Rv3861	CCP46690.1	0	52	Hypothetical protein
Rv3806c	CCP46635.1	1	132	Decaprenylphosphoryl-5-phosphoribose (DPPR) synthase (decaprenyl-phosphate 5-phosphoribosyltransferase)
Rv3863	CCP46692.1	0	70	Unknown alanine rich protein
Rv2796c	CCP45595.1	0	42	Probable conserved lipoprotein LppV
Rv2438c	CCP45230.1	0	104	Glutamine-dependent NAD(+) synthetase NadE (NAD(+) synthase [glutamine-hydrolysing])
Rv3867	CCP46696.1	0	705	ESX-1 secretion-associated protein EspH
Rv3866	CCP46695.1	0	505	ESX-1 secretion-associated protein EspG1
Rv2193	CCP44970.1	1	513	Probable cytochrome C oxidase (subunit III) CtaE
Rv3817	CCP46646.1	0	79	Possible phosphotransferase
Rv2191	CCP44968.1	0	77	Conserved hypothetical protein
Rv2196	CCP44973.1	0	1316	Probable ubiquinol-cytochrome C reductase QcrB (cytochrome B subunit)
Rv1750c	CCP44516.1	0	39	Possible fatty-acid-CoA ligase FadD1 (fatty-acid-CoA synthetase) (fatty-acid-CoA synthase)
Rv2194	CCP44971.1	1	919	Probable ubiquinol-cytochrome C reductase QcrC (cytochrome C subunit)
Rv2195	CCP44972.1	1	992	Probable rieske iron-sulfur protein QcrA
Rv3695	CCP46519.1	0	74	Possible conserved membrane protein
Rv2008c	CCP44780.1	0	32	Conserved hypothetical protein
Rv0634B	CCP43377.1	1	104	50S ribosomal protein L33 RpmG2
Rv2203	CCP44980.1	0	186	Possible conserved membrane protein
Rv0634A	CCP43376.1	0	58	Unknown protein
Rv2206	CCP44983.1	0	93	Probable conserved transmembrane protein
Rv2207	CCP44984.1	1	86	Probable nicotinate-nucleotide-dimethylbenzimidazol phosphoribosyltransferase CobT
Rv3606c	CCP46429.1	0	360	2-amino-4-hydroxy-6-hydroxymethyldihydropteridinepyrophosphokinase FolK (7,8-dihydro-6-hydroxymethylpterin-pyrophosphokinase) (HPPK) (6-hydroxymethyl-7,8-dihydropterin pyrophosphokinase) (PPPK) (2-amino-4-hydroxy-6-hydroxymethyldihydropteridine diphosphokinase) (7,8-dihydro-6-hydroxymethylpterin-diphosphokinase) (6-hydroxymethyl-7,8-dihydropterin diphosphokinase)
Rv2208	CCP44985.1	0	70	Probable cobalamin 5'-phosphate synthase CobS
Rv2209	CCP44986.1	0	65	Probable conserved integral membrane protein
Rv3733c	CCP46560.1	0	79	Conserved hypothetical protein
Rv1371	CCP44130.1	0	32	Probable conserved membrane protein
Rv0867c	CCP43615.1	0	182	Possible resuscitation-promoting factor RpfA
Rv1563c	CCP44327.1	0	40	Maltooligosyltrehalose synthase TreY
Rv3482c	CCP46304.1	0	49	Probable conserved membrane protein
Rv3914	CCP46743.1	0	57	Thioredoxin TrxC (TRX) (MPT46)
Rv2428	CCP45220.1	0	69	Alkyl hydroperoxide reductase C protein AhpC (alkyl hydroperoxidase C)
Rv2429	CCP45221.1	0	152	Alkyl hydroperoxide reductase D protein AhpD (alkyl hydroperoxidase D)
Rv2554c	CCP45350.1	0	1912	Conserved protein
Rv3025c	CCP45833.1	1	130	Cysteine desulfurase IscS (NIFS protein homolog) (nitrogenase metalloclusters biosynthesis protein NIFS)
Rv3913	CCP46742.1	1	71	Probable thioredoxin reductase TrxB2 (TRXR) (TR)
Rv3912	CCP46741.1	0	39	Hypothetical alanine rich protein
Rv2422	CCP45213.1	0	29	Hypothetical protein
Rv2423	CCP45214.1	0	35	Hypothetical protein
Rv2489c	CCP45283.1	0	34	Hypothetical alanine rich protein
Rv2160c	CCP44937.1	0	7371	Conserved hypothetical protein
Rv1674c	CCP44439.1	0	34	Probable transcriptional regulatory protein
Rv3349c	CCP46170.1	0	51	Probable transposase
Rv3415c	CCP46237.1	0	35	Conserved hypothetical protein
Rv1924c	CCP44691.1	0	68	Unknown protein
Rv3564	CCP46386.1	0	44	Probable acyl-CoA dehydrogenase FadE33
Rv1621c	CCP44385.1	0	891	Probable 'component linked with the assembly of cytochrome' transport transmembrane ATP-binding protein ABC transporter CydD
Rv1761c	CCP44527.1	0	56	Possible exported protein
Rv1379	CCP44138.1	0	311	Probable pyrimidine operon regulatory protein PyrR
Rv1734c	CCP44500.1	0	1088	Conserved hypothetical protein
Rv1647	CCP44412.1	0	53	Adenylate cyclase (ATP pyrophosphate-lyase) (adenylyl cyclase)
Rv1646	CCP44411.1	0	88	PE family protein PE17
Rv1644	CCP44409.1	0	282	Possible 23S rRNA methyltransferase TsnR
Rv1643	CCP44408.1	1	623	50S ribosomal protein L20 RplT
Rv1642	CCP44407.1	1	545	50S ribosomal protein L35 RpmI
Rv1641	CCP44406.1	1	516	Probable initiation factor if-3 InfC
Rv3688c	CCP46512.1	0	81	Conserved protein
Rv2160A	CCP44936.1	0	6307	Conserved hypothetical protein
Rv1649	CCP44414.1	1	72	Probable phenylalanyl-tRNA synthetase, alpha chain PheS
Rv1648	CCP44413.1	0	60	Probable transmembrane protein
Rv3702c	CCP46527.1	0	79	Conserved hypothetical protein
Rv0774c	CCP43521.1	0	47	Probable conserved exported protein
Rv3301c	CCP46120.1	0	78	Probable phosphate-transport system transcriptional regulatory protein PhoU homolog 1 PhoY1
Rv1269c	CCP44025.1	0	39	Conserved probable secreted protein
Rv2519	CCP45313.1	0	114	PE family protein PE26
Rv0669c	CCP43412.1	0	56	Possible hydrolase
Rv2513	CCP45307.1	0	80	Hypothetical protein
Rv1960c	CCP44728.1	0	149	Possible antitoxin ParD1
Rv2851c	CCP45652.1	0	805	GCN5-related N-acetyltransferase
Rv2734	CCP45532.1	0	47	Conserved hypothetical protein
Rv2781c	CCP45580.1	0	1828	Possible alanine rich oxidoreductase
Rv2026c	CCP44799.1	0	37	Universal stress protein family protein
Rv2731	CCP45529.1	0	104	Conserved alanine and arginine rich protein
Rv2603c	CCP45400.1	1	179	Highly conserved protein
Rv3858c	CCP46687.1	1	180	Probable NADH-dependent glutamate synthase (small subunit) GltD (L-glutamate synthase) (L-glutamate synthetase) (NADH-glutamate synthase) (glutamate synthase (NADH)) (GLTS beta chain) (NADPH-GOGAT)
Rv1856c	CCP44622.1	0	60	Possible oxidoreductase
Rv3417c	CCP46239.1	1	776	60 kDa chaperonin 1 GroEL1 (protein CPN60-1) (GroEL protein 1)
Rv3696c	CCP46520.1	0	47	Probable glycerol kinase GlpK (ATP:glycerol 3-phosphotransferase) (glycerokinase) (GK)
Rv1993c	CCP44765.1	0	792	Conserved protein
Rv2588c	CCP45384.1	1	164	Probable conserved membrane protein secretion factor YajC
Rv0918	CCP43666.1	0	50	Conserved protein
Rv0919	CCP43667.1	0	59	GCN5-related N-acetyltransferase
Rv1421	CCP44180.1	1	203	Conserved protein
Rv1420	CCP44179.1	0	149	Probable excinuclease ABC (subunit C-nuclease) UvrC
Rv1230c	CCP43986.1	0	95	Possible membrane protein
Rv3125c	CCP45935.1	0	59	PPE family protein PPE49
Rv1425	CCP44184.1	0	53	Possible triacylglycerol synthase (diacylglycerol acyltransferase)
Rv3808c	CCP46637.1	1	135	Bifunctional UDP-galactofuranosyl transferase GlfT2
Rv0910	CCP43658.1	0	70	Conserved hypothetical protein
Rv0911	CCP43659.1	0	39	Conserved protein
Rv0912	CCP43660.1	0	47	Probable conserved transmembrane protein
Rv3009c	CCP45815.1	1	111	Probable glutamyl-tRNA(GLN) amidotransferase (subunit B) GatB (Glu-ADT subunit B)
Rv1325c	CCP44083.1	0	158	PE-PGRS family protein PE_PGRS24
Rv1841c	CCP44607.1	0	245	Conserved hypothetical membrane protein
Rv0917	CCP43665.1	0	45	Possible glycine betaine transport integral membrane protein BetP
Rv3824c	CCP46653.1	0	28	Conserved polyketide synthase associated protein PapA1
Rv0077c	CCP42800.1	0	54	Probable oxidoreductase
Rv0940c	CCP43688.1	0	174	Possible oxidoreductase
Rv3430c	CCP46252.1	0	64	Possible transposase
Rv3294c	CCP46113.1	0	57	Conserved hypothetical protein
Rv1896c	CCP44663.1	0	58	Conserved hypothetical protein
Rv0250c	CCP42979.1	0	468	Conserved protein
Rv1359	CCP44117.1	0	72	Probable transcriptional regulatory protein
Rv1358	CCP44116.1	0	33	Probable transcriptional regulatory protein
Rv3489	CCP46311.1	0	229	Unknown protein
Rv3488	CCP46310.1	0	33	Conserved hypothetical protein
Rv1069c	CCP43820.1	0	53	Conserved protein
Rv1350	CCP44108.1	0	43	Probable 3-oxoacyl-[acyl-carrier protein] reductase FabG2 (3-ketoacyl-acyl carrier protein reductase)
Rv1034c	CCP43785.1	0	38	Probable transposase (fragment)
Rv1352	CCP44110.1	0	137	Conserved protein
Rv3386	CCP46207.1	0	42	Possible transposase
Rv1439c	CCP44198.1	0	43	Unknown protein
Rv1776c	CCP44543.1	0	46	Possible transcriptional regulatory protein
Rv2696c	CCP45494.1	0	77	Conserved alanine and glycine and valine rich protein
Rv3649	CCP46472.1	0	36	Probable helicase
Rv2142A	CCP44918.1	0	113	Possible antitoxin ParD2
Rv3734c	CCP46561.1	0	63	Putative triacylglycerol synthase (diacylglycerol acyltransferase) Tgs2
Rv3645	CCP46468.1	1	114	Probable conserved transmembrane protein
Rv3643	CCP46466.1	0	37	Hypothetical protein
Rv3435c	CCP46257.1	0	80	Probable conserved transmembrane protein
Rv0352	CCP43082.1	1	525	Probable chaperone protein DnaJ1
Rv0353	CCP43083.1	1	215	Probable heat shock protein transcriptional repressor HspR (MerR family)
Rv0350	CCP43080.1	1	918	Probable chaperone protein DnaK (heat shock protein 70) (heat shock 70 kDa protein) (HSP70)
Rv0351	CCP43081.1	0	979	Probable GrpE protein (HSP-70 cofactor)
Rv1227c	CCP43983.1	0	282	Probable transmembrane protein
Rv0451c	CCP43182.1	0	119	Probable conserved membrane protein MmpS4
Rv0359	CCP43089.1	0	46	Probable conserved integral membrane protein
Rv1074c	CCP43825.1	0	96	Probable beta-ketoacyl CoA thiolase FadA3
Rv0594	CCP43333.1	0	51	Mce-family protein Mce2F
Rv1572c	CCP44336.1	0	77	Conserved hypothetical protein
Rv0590	CCP43328.1	0	168	Mce-family protein Mce2B
Rv0591	CCP43330.1	0	68	Mce-family protein Mce2C
Rv0592	CCP43331.1	0	59	Mce-family protein Mce2D
Rv0593	CCP43332.1	0	61	Possible Mce-family lipoprotein LprL (Mce-family lipoprotein Mce2E)
Rv1517	CCP44281.1	0	44	Conserved hypothetical transmembrane protein
Rv3165c	CCP45976.1	0	46	Unknown protein
Rv2511	CCP45305.1	1	47	Oligoribonuclease Orn
Rv1513	CCP44277.1	0	25	Conserved protein
Rv0151c	CCP42876.1	0	38	PE family protein PE1
Rv1511	CCP44275.1	0	55	GDP-D-mannose dehydratase GmdA (GDP-mannose 4,6 dehydratase) (GMD)
Rv1510	CCP44274.1	0	46	Conserved probable membrane protein
Rv1444c	CCP44203.1	0	46	Unknown protein
Rv0178	CCP42904.1	0	143	Probable conserved Mce associated membrane protein
Rv3579c	CCP46402.1	1	148	Possible tRNA/rRNA methyltransferase
Rv2777c	CCP45576.1	0	153	Conserved hypothetical protein
Rv0545c	CCP43283.1	0	144	Probable low-affinity inorganic phosphate transporter integral membrane protein PitA
Rv0173	CCP42899.1	0	56	Possible Mce-family lipoprotein LprK (Mce-family lipoprotein Mce1E)
Rv0598c	CCP43337.1	0	97	Possible toxin VapC27. Contains PIN domain.
Rv0171	CCP42897.1	0	65	Mce-family protein Mce1C
Rv0176	CCP42902.1	0	159	Probable conserved Mce associated transmembrane protein
Rv0177	CCP42903.1	0	192	Probable conserved Mce associated protein
Rv0174	CCP42900.1	0	103	Mce-family protein Mce1F
Rv0175	CCP42901.1	0	338	Probable conserved Mce associated membrane protein
Rv0410c	CCP43141.1	1	648	Serine/threonine-protein kinase PknG (protein kinase G) (STPK G)
Rv0445c	CCP43176.1	0	75	Alternative RNA polymerase sigma factor SigK
Rv2360c	CCP45148.1	0	72	Unknown protein
Rv3555c	CCP46377.1	0	41	Conserved protein
Rv0975c	CCP43724.1	0	286	Probable acyl-CoA dehydrogenase FadE13
Rv3623	CCP46446.1	0	49	Probable conserved lipoprotein LpqG
Rv0811c	CCP43559.1	0	208	Conserved protein
Rv1818c	CCP44584.1	0	394	PE-PGRS family protein PE_PGRS33
Rv3220c	CCP46036.1	1	207	Probable two component sensor kinase
Rv3047c	CCP45856.1	0	69	Hypothetical protein
Rv0421c	CCP43152.1	0	60	Conserved hypothetical protein
Rv0272c	CCP43001.1	0	220	Unknown protein
Rv2822c	CCP45622.1	0	40	Hypothetical protein
Rv3039c	CCP45848.1	0	36	Probable enoyl-CoA hydratase EchA17 (crotonase) (unsatured acyl-CoA hydratase) (enoyl hydrase)
Rv0875c	CCP43623.1	0	291	Possible conserved exported protein
Rv0770	CCP43517.1	0	75	Probable dehydrogenase/reductase
Rv0771	CCP43518.1	0	61	Possible 4-carboxymuconolactone decarboxylase (CMD)
Rv0772	CCP43519.1	1	55	Probable phosphoribosylamine--glycine ligase PurD (GARS) (glycinamide ribonucleotide synthetase) (phosphoribosylglycinamide synthetase) (5'-phosphoribosylglycinamide synthetase)
Rv2048c	CCP44821.1	0	79	Polyketide synthase Pks12
Rv0775	CCP43522.1	0	112	Conserved hypothetical protein
Rv0777	CCP43524.1	1	82	Probable adenylosuccinate lyase PurB (adenylosuccinase) (ASL) (ASASE)
Rv0778	CCP43525.1	0	46	Possible cytochrome P450 126 Cyp126
Rv0129c	CCP42854.1	0	106	Secreted antigen 85-C FbpC (85C) (antigen 85 complex C) (AG58C) (mycolyl transferase 85C) (fibronectin-binding protein C)
Rv3570c	CCP46393.1	0	84	Possible oxidoreductase. Possible 3-hydroxy-9,10-seconandrost-1,3,5(10)-triene-9,17-dione hydroxylase.
Rv0006	CCP42728.1	1	281	DNA gyrase (subunit A) GyrA (DNA topoisomerase (ATP-hydrolysing)) (DNA topoisomerase II) (type II DNA topoisomerase)
Rv0007	CCP42729.1	0	168	Possible conserved membrane protein
Rv0004	CCP42726.1	1	48	Conserved hypothetical protein
Rv0005	CCP42727.1	0	363	DNA gyrase (subunit B) GyrB (DNA topoisomerase (ATP-hydrolysing)) (DNA topoisomerase II) (type II DNA topoisomerase)
Rv0002	CCP42724.1	1	49	DNA polymerase III (beta chain) DnaN (DNA nucleotidyltransferase)
Rv0003	CCP42725.1	1	48	DNA replication and repair protein RecF (single-strand DNA binding protein)
Rv0001	CCP42723.1	1	53	Chromosomal replication initiator protein DnaA
Rv3892c	CCP46721.1	0	36	PPE family protein PPE69
Rv2760c	CCP45559.1	0	47	Possible antitoxin VapB42
Rv2020c	CCP44792.1	0	55	Conserved hypothetical protein
Rv1374c	CCP44133.1	0	71	Hypothetical protein
Rv0118c	CCP42843.1	0	97	Probable oxalyl-CoA decarboxylase OxcA
Rv0009	CCP42731.1	1	414	Probable iron-regulated peptidyl-prolyl cis-trans isomerase A PpiA (PPIase A) (rotamase A)
Rv3263	CCP46082.1	0	45	Probable DNA methylase (modification methylase) (methyltransferase)
Rv3262	CCP46081.1	1	63	Probable F420 biosynthesis protein FbiB
Rv3261	CCP46080.1	1	54	Probable F420 biosynthesis protein FbiA
Rv3596c	CCP46419.1	1	323	Probable ATP-dependent protease ATP-binding subunit ClpC1
Rv3267	CCP46086.1	0	109	Conserved protein (CPSA-related protein)
Rv2959c	CCP45763.1	0	70	Possible methyltransferase (methylase)
Rv3531c	CCP46353.1	0	142	Hypothetical protein
Rv2351c	CCP45139.1	0	38	Membrane-associated phospholipase C 1 PlcA (MTP40 antigen)
Rv3269	CCP46088.1	0	6137	Conserved protein
Rv0962c	CCP43711.1	0	83	Possible lipoprotein LprP
Rv3132c	CCP45942.1	0	389	Two component sensor histidine kinase DevS
Rv1290c	CCP44046.1	0	47	Conserved protein
Rv2304c	CCP45086.1	0	42	Hypothetical protein
Rv1582c	CCP44346.1	0	90	Probable PhiRv1 phage protein
Rv3464	CCP46286.1	1	82	dTDP-glucose 4,6-dehydratase RmlB
Rv0392c	CCP43122.1	0	60	Probable membrane NADH dehydrogenase NdhA
Rv2999	CCP45805.1	0	37	Probable conserved lipoprotein LppY
Rv3468c	CCP46290.1	0	42	Possible dTDP-glucose 4,6-dehydratase
Rv3463	CCP46285.1	0	26	Conserved protein
Rv3673c	CCP46496.1	0	118	Possible membrane-anchored thioredoxin-like protein (thiol-disulfide interchange related protein)
Rv0924c	CCP43672.1	0	37	Divalent cation-transport integral membrane protein MntH (BRAMP) (MRAMP)
Rv2427A		0	38	Transcriptional regulator OxyR', pseudogene
Rv2997	CCP45802.1	0	52	Possible alanine rich dehydrogenase
Rv2994	CCP45799.1	0	61	Probable conserved integral membrane protein
Rv0953c	CCP43701.1	0	38	Possible oxidoreductase
Rv2439c	CCP45232.1	1	47	Probable glutamate 5-kinase protein ProB (gamma-glutamyl kinase) (GK)
Rv2670c	CCP45468.1	0	43	Conserved hypothetical protein
Rv1290A	CCP44047.1	0	65	Hypothetical protein
Rv2835c	CCP45636.1	0	35	Probable Sn-glycerol-3-phosphate transport integral membrane protein ABC transporter UgpA
Rv3791	CCP46620.1	1	37	Decaprenylphosphoryl-D-2-keto erythro pentose reductase
Rv1133c	CCP43887.1	0	1376	Probable 5-methyltetrahydropteroyltriglutamate--homocysteine methyltransferase MetE (methionine synthase, vitamin-B12 independent isozyme)
Rv3202c	CCP46017.1	0	66	Possible ATP-dependent DNA helicase
Rv0310c	CCP43040.1	0	41	Conserved protein
Rv2202c	CCP44979.1	1	173	Adenosine kinase
Rv2504c	CCP45298.1	0	325	Probable succinyl-CoA:3-ketoacid-coenzyme A transferase (alpha subunit) ScoA (3-oxo acid:CoA transferase) (OXCT A) (succinyl-CoA:3-oxoacid-coenzyme A transferase)
Rv0791c	CCP43539.1	0	75	Conserved protein
Rv0329c	CCP43059.1	0	62	Conserved hypothetical protein
Rv3888c	CCP46717.1	0	47	Probable conserved membrane protein
Rv1869c	CCP44635.1	0	207	Probable reductase
Rv2460c	CCP45253.1	1	119	Probable ATP-dependent CLP protease proteolytic subunit 2 ClpP2 (endopeptidase CLP 2)
Rv0837c	CCP43585.1	0	66	Hypothetical protein
Rv0155	CCP42880.1	0	40	Probable NAD(P) transhydrogenase (subunit alpha) PntAa [first part; catalytic part] (pyridine nucleotide transhydrogenase subunit alpha) (nicotinamide nucleotide transhydrogenase subunit alpha)
Rv0016c	CCP42738.1	1	336	Probable penicillin-binding protein PbpA
Rv0624	CCP43365.1	0	69	Possible toxin VapC30. Contains PIN domain.
Rv1247c	CCP44003.1	0	78	Antitoxin RelB
Rv1910c	CCP44677.1	0	55	Probable exported protein
Rv0139	CCP42864.1	0	49	Possible oxidoreductase
Rv3592	CCP46415.1	0	175	Possible heme degrading protein MhuD
Rv2386c	CCP45174.1	0	338	Isochorismate synthase MbtI
Rv2739c	CCP45538.1	1	49	Possible alanine rich transferase
Rv1423	CCP44182.1	1	149	Probable transcriptional regulatory protein WhiA
Rv3542c	CCP46364.1	0	222	Conserved hypothetical protein
Rv1422	CCP44181.1	1	221	Conserved hypothetical protein
Rv2239c	CCP45019.1	1	145	Conserved hypothetical protein
Rv2264c	CCP45045.1	0	61	Conserved hypothetical proline rich protein
Rv2753c	CCP45552.1	1	335	Probable dihydrodipicolinate synthase DapA (DHDPS) (dihydrodipicolinate synthetase)
Rv3765c	CCP46592.1	0	46	Probable two component transcriptional regulatory protein TcrX
Rv0307c	CCP43037.1	0	52	Unknown protein
Rv2346c	CCP45134.1	0	181	Putative ESAT-6 like protein EsxO (ESAT-6 like protein 6)
Rv3070	CCP45879.1	0	58	Probable conserved integral membrane protein
Rv3071	CCP45880.1	0	52	Conserved hypothetical protein
Rv3076	CCP45885.1	0	34	Conserved hypothetical protein
Rv3077	CCP45886.1	0	35	Possible hydrolase
Rv3074	CCP45883.1	0	84	Conserved hypothetical protein
Rv3078	CCP45887.1	0	72	Probable hydroxylaminobenzene mutase Hab
Rv0097	CCP42822.1	0	42	Possible oxidoreductase
Rv3093c	CCP45902.1	0	59	Hypothetical oxidoreductase
Rv0116c	CCP42841.1	0	142	Probable L,D-transpeptidase LdtA
Rv2477c	CCP45271.1	1	93	Probable macrolide-transport ATP-binding protein ABC transporter
Rv2224c	CCP45002.1	0	109	Probable carboxylesterase CaeA
Rv0585c	CCP43323.1	0	43	Probable conserved integral membrane protein
Rv3459c	CCP46281.1	1	350	30S ribosomal protein S11 RpsK
Rv2655c	CCP45453.1	0	70	Possible PhiRv2 prophage protein
Rv2682c	CCP45480.1	1	62	Probable 1-deoxy-D-xylulose 5-phosphate synthase Dxs1 (1-deoxyxylulose-5-phosphate synthase) (DXP synthase) (DXPS)
Rv1101c	CCP43854.1	0	112	Conserved membrane protein
Rv1369c	CCP44128.1	0	509	Probable transposase
Rv1204c	CCP43960.1	0	50	Conserved hypothetical protein
Rv0198c	CCP42926.1	0	99	Probable zinc metalloprotease Zmp1
Rv1527c	CCP44291.1	0	75	Probable polyketide synthase Pks5
Rv2163c	CCP44940.1	1	344	Probable penicillin-binding membrane protein PbpB
Rv0759c	CCP43506.1	1	181	Conserved hypothetical protein
Rv1620c	CCP44384.1	0	324	Probable 'component linked with the assembly of cytochrome' transport transmembrane ATP-binding protein ABC transporter CydC
Rv1675c	CCP44440.1	0	23	Probable transcriptional regulatory protein Cmr
Rv0653c	CCP43396.1	0	51	Possible transcriptional regulatory protein (probably TetR-family)
Rv1737c	CCP44503.1	0	511	Possible nitrate/nitrite transporter NarK2
Rv2977c	CCP45782.1	0	86	Probable thiamine-monophosphate kinase ThiL (thiamine-phosphate kinase)
Rv3346c	CCP46167.1	0	66	Conserved transmembrane protein
Rv2468c	CCP45261.1	0	105	Conserved protein
Rv2947c	CCP45751.1	0	44	Probable polyketide synthase Pks15
Rv1963c	CCP44732.1	0	48	Probable transcriptional repressor (probably TetR-family) Mce3R
Rv3108	CCP45918.1	0	53	Hypothetical protein
Rv2034	CCP44807.1	0	454	ArsR repressor protein
Rv2604c	CCP45401.1	1	67	Probable glutamine amidotransferase SnoP
Rv3306c	CCP46125.1	0	164	Probable amidohydrolase AmiB1 (aminohydrolase)
Rv1268c	CCP44024.1	0	38	Hypothetical protein
Rv2740	CCP45539.1	0	71	Epoxide hydrolase
Rv1179c	CCP43935.1	0	227	Unknown protein
Rv3738c	CCP46565.1	0	45	PPE family protein PPE66
Rv1365c	CCP44123.1	0	35	Anti-anti-sigma factor RsfA (anti-sigma factor antagonist) (regulator of sigma F A)
Rv1148c	CCP43903.1	0	137	Conserved hypothetical protein
Rv2181	CCP44958.1	0	147	Alpha(1->2)mannosyltransferase
Rv2187	CCP44964.1	0	61	Long-chain-fatty-acid-CoA ligase FadD15 (fatty-acid-CoA synthetase) (fatty-acid-CoA synthase)
Rv3685c	CCP46509.1	0	51	Probable cytochrome P450 137 Cyp137
Rv2495c	CCP45289.1	0	1400	Probable branched-chain keto acid dehydrogenase E2 component BkdC
Rv2112c	CCP44887.1	1	59	Deamidase of pup Dop
Rv2213	CCP44990.1	1	64	Probable aminopeptidase PepB
Rv2212	CCP44989.1	0	63	Adenylyl cyclase (ATP pyrophosphate-lyase) (adenylate cyclase)
Rv2215	CCP44992.1	1	266	DlaT, dihydrolipoamide acyltransferase, E2 component of pyruvate dehydrogenase
Rv2217	CCP44994.1	1	271	Probable lipoate biosynthesis protein B LipB
Rv2216	CCP44993.1	0	172	Conserved protein
Rv2219	CCP44996.1	1	203	Probable conserved transmembrane protein
Rv2218	CCP44995.1	0	202	Probable lipoate biosynthesis protein A LipA
Rv2030c	CCP44803.1	0	1918	Conserved protein
Rv3032A	CCP45841.1	0	21	Conserved protein
Rv3398c	CCP46220.1	0	35	Probable multifunctional geranylgeranyl pyrophosphate synthetase IdsA1 (GGPP synthetase) (ggppsase) (geranylgeranyl diphosphate synthase): dimethylallyltransferase (prenyltransferase) (geranyl-diphosphate synthase) + geranyltranstransferase (farnesyl-diphosphate synthase) (farnesyl-pyrophosphate synthetase) (farnesyl diphosphate synthetase) (FPP synthetase) + farnesyltranstransferase (geranylgera…
Rv0897c	CCP43645.1	0	283	Probable oxidoreductase
Rv2316	CCP45103.1	0	30	Probable sugar-transport integral membrane protein ABC transporter UspA
Rv3857c	CCP46686.1	0	240	Possible membrane protein
Rv3368c	CCP46189.1	0	61	Possible oxidoreductase
Rv3763	CCP46590.1	0	76	19 kDa lipoprotein antigen precursor LpqH
Rv1068c	CCP43819.1	0	23	PE-PGRS family protein PE_PGRS20
Rv3760	CCP46587.1	0	55	Possible conserved membrane protein
Rv2437	CCP45229.1	0	83	Conserved transmembrane protein
Rv2436	CCP45228.1	0	50	Ribokinase RbsK
Rv3351c	CCP46172.1	0	37	Conserved hypothetical protein
Rv1035c	CCP43786.1	0	32	Probable transposase (fragment)
Rv3384c	CCP46205.1	0	96	Possible toxin VapC46. Contains PIN domain.
Rv3436c	CCP46258.1	1	74	Probable glucosamine--fructose-6-phosphate aminotransferase [isomerizing] GlmS (hexosephosphate aminotransferase) (D-fructose-6-phosphate amidotransferase) (GFAT) (L-glutamine-D-fructose-6-phosphate amidotransferase) (glucosamine-6-phosphate synthase)
Rv3208	CCP46023.1	1	89	Probable transcriptional regulatory protein (probably TetR-family)
Rv1779c	CCP44546.1	0	124	Possible integral membrane protein
Rv3064c	CCP45873.1	0	37	Probable conserved integral membrane protein
Rv1633	CCP44397.1	1	430	Probable excinuclease ABC (subunit B-helicase) UvrB
Rv1630	CCP44394.1	1	328	30S ribosomal protein S1 RpsA
Rv1631	CCP44395.1	0	168	Probable dephospho-CoA kinase CoaE (dephosphocoenzyme a kinase)
Rv1636	CCP44400.1	1	115	Iron-regulated universal stress protein family protein TB15.3
Rv1634	CCP44398.1	0	216	Possible drug efflux membrane protein
Rv1983	CCP44753.1	0	90	PE-PGRS family protein PE_PGRS35
Rv1075c	CCP43826.1	0	40	Conserved exported protein
Rv1638	CCP44402.1	1	423	Probable excinuclease ABC (subunit A-DNA-binding ATPase) UvrA
Rv1226c	CCP43982.1	0	183	Probable transmembrane protein
Rv1988	CCP44758.1	0	51	Probable 23S rRNA methyltransferase Erm(37)
Rv3421c	CCP46243.1	0	144	Conserved hypothetical protein
Rv1351	CCP44109.1	0	61	Hypothetical protein
Rv2141c	CCP44916.1	1	56	Conserved protein
Rv3079c	CCP45888.1	0	76	Conserved protein
Rv2509	CCP45303.1	1	62	Probable short-chain type dehydrogenase/reductase
Rv3851	CCP46680.1	0	44	Possible membrane protein
Rv2756c	CCP45555.1	0	45	Possible type I restriction/modification system DNA methylase HsdM (M protein) (DNA methyltransferase)
Rv3853	CCP46682.1	1	130	Regulator of RNase E activity a RraA
Rv2507	CCP45301.1	0	120	Possible conserved proline rich membrane protein
Rv2506	CCP45300.1	0	80	Probable transcriptional regulatory protein (probably TetR-family)
Rv2039c	CCP44812.1	0	43	Probable sugar-transport integral membrane protein ABC transporter
Rv3496c	CCP46318.1	0	97	Mce-family protein Mce4D
Rv3414c	CCP46236.1	0	214	Probable alternative RNA polymerase sigma-D factor SigD
Rv2720	CCP45518.1	1	123	Repressor LexA
Rv2723	CCP45521.1	0	42	Probable conserved integral membrane protein
Rv2722	CCP45520.1	0	51	Conserved hypothetical protein
Rv3160c	CCP45971.1	0	168	Possible transcriptional regulatory protein (probably TetR-family)
Rv1637c	CCP44401.1	0	95	Conserved protein
Rv2797c	CCP45596.1	0	39	Conserved hypothetical protein
Rv0907	CCP43655.1	0	48	Conserved protein
Rv0906	CCP43654.1	0	71	Conserved protein
Rv0905	CCP43653.1	1	122	Possible enoyl-CoA hydratase EchA6 (enoyl hydrase) (unsaturated acyl-CoA hydratase) (crotonase)
Rv0901	CCP43649.1	0	116	Possible conserved exported or membrane protein
Rv0900	CCP43648.1	0	106	Possible membrane protein
Rv3320c	CCP46140.1	0	55	Possible toxin VapC44. Contains PIN domain.
Rv3484	CCP46306.1	0	63	Possible conserved protein CpsA
Rv0909	CCP43657.1	0	89	Conserved hypothetical protein
Rv0908	CCP43656.1	0	46	Probable metal cation transporter ATPase P-type CtpE
Rv1188	CCP43944.1	0	36	Probable proline dehydrogenase
Rv1189	CCP43945.1	0	36	Possible alternative RNA polymerase sigma factor SigI
Rv2344c	CCP45132.1	1	74	Probable deoxyguanosine triphosphate triphosphohydrolase Dgt (dGTPase) (dGTP triphosphohydrolase)
Rv1187	CCP43943.1	0	40	Probable pyrroline-5-carboxylate dehydrogenase RocA
Rv1180	CCP43936.1	0	58	Probable polyketide beta-ketoacyl synthase Pks3
Rv1181	CCP43937.1	0	47	Probable polyketide beta-ketoacyl synthase Pks4
Rv1182	CCP43938.1	0	39	Probable conserved polyketide synthase associated protein PapA3
Rv1183	CCP43939.1	0	40	Probable conserved transmembrane transport protein MmpL10
Rv3053c	CCP45862.1	0	1338	Probable glutaredoxin electron transport component of NRDEF (glutaredoxin-like protein) NrdH
Rv3046c	CCP45855.1	0	108	Conserved protein
Rv1748	CCP44514.1	0	61	Unknown protein
Rv1746	CCP44512.1	0	49	Anchored-membrane serine/threonine-protein kinase PknF (protein kinase F) (STPK F)
Rv1747	CCP44513.1	0	123	Probable conserved transmembrane ATP-binding protein ABC transporter
Rv3624c	CCP46447.1	1	167	Hypoxanthine-guanine phosphoribosyltransferase Hpt (HGPRT) (HGPRTase) (hypoxanthine phosphoribosyltransferase) (imp pyrophosphorylase) (imp diphosphorylase) (transphosphoribosyltransferase) (guanine phosphoribosyltransferase)
Rv1742	CCP44508.1	0	40	Unknown protein
Rv1668c	CCP44433.1	0	42	Probable first part of macrolide-transport ATP-binding protein ABC transporter
Rv1740	CCP44506.1	0	50	Possible antitoxin VapB34
Rv1741	CCP44507.1	0	47	Possible toxin VapC34. Contains PIN domain.
Rv1166	CCP43922.1	0	173	Probable conserved lipoprotein LpqW
Rv1164	CCP43920.1	0	290	Probable respiratory nitrate reductase (gamma chain) NarI
Rv1165	CCP43921.1	1	288	Possible GTP-binding translation elongation factor TypA (tyrosine phosphorylated protein A) (GTP-binding protein)
Rv1162	CCP43918.1	0	1038	Probable respiratory nitrate reductase (beta chain) NarH
Rv1163	CCP43919.1	0	702	Probable respiratory nitrate reductase (delta chain) NarJ
Rv1160	CCP43916.1	0	30	Probable mutator protein MutT2 (7,8-dihydro-8-oxoguanine-triphosphatase) (8-oxo-dGTPase)
Rv1161	CCP43917.1	0	1461	Respiratory nitrate reductase (alpha chain) NarG
Rv3509c	CCP46331.1	0	84	Probable acetohydroxyacid synthase IlvX (acetolactate synthase)
Rv0519c	CCP43256.1	0	34	Possible conserved membrane protein
Rv3679	CCP46503.1	1	286	Probable anion transporter ATPase
Rv2438A	CCP45231.1	0	56	Conserved hypothetical protein
Rv1899c	CCP44666.1	0	399	Possible lipoprotein LppD
Rv3670	CCP46493.1	1	38	Possible epoxide hydrolase EphE (epoxide hydratase) (arene-oxide hydratase)
Rv1291c	CCP44048.1	0	28	Conserved hypothetical secreted protein
Rv2307c	CCP45090.1	0	70	Conserved hypothetical protein
Rv3530c	CCP46352.1	0	100	Possible oxidoreductase
Rv3675	CCP46498.1	0	88	Possible membrane protein
Rv3676	CCP46499.1	1	143	Transcriptional regulatory protein Crp (Crp/Fnr-family)
Rv0341	CCP43071.1	0	3647	Isoniazid inductible gene protein IniB
Rv0340	CCP43070.1	0	88	Conserved protein
Rv0343	CCP43073.1	0	526	Isoniazid inductible gene protein IniC
Rv0342	CCP43072.1	0	788	Isoniazid inductible gene protein IniA
Rv1313c	CCP44070.1	0	202	Possible transposase
Rv2413c	CCP45204.1	1	91	Conserved hypothetical protein
Rv0347	CCP43077.1	0	58	Probable conserved membrane protein
Rv0014c	CCP42736.1	0	225	Transmembrane serine/threonine-protein kinase B PknB (protein kinase B) (STPK B)
Rv0349	CCP43079.1	0	70	Hypothetical protein
Rv0348	CCP43078.1	0	110	Possible transcriptional regulatory protein
Rv0950c	CCP43698.1	0	59	Conserved hypothetical protein
Rv2081c	CCP44856.1	0	88	Conserved transmembrane protein
Rv1298	CCP44055.1	1	267	50S ribosomal protein L31 RpmE
Rv1299	CCP44056.1	1	123	Probable peptide chain release factor 1 PrfA (RF-1)
Rv0581	CCP43319.1	0	69	Possible antitoxin VapB26
Rv1569	CCP44333.1	1	45	Probable 8-amino-7-oxononanoate synthase BioF1 (AONS) (8-amino-7-ketopelargonate synthase) (7-keto-8-amino-pelargonic acid synthetase) (7-KAP synthetase) (L-alanine--pimelyl CoA ligase)
Rv0587	CCP43325.1	0	310	Conserved hypothetical integral membrane protein YrbE2A
Rv0586	CCP43324.1	0	237	Probable transcriptional regulatory protein Mce2R (GntR-family)
Rv2912c	CCP45714.1	0	33	Probable transcriptional regulatory protein (probably TetR-family)
Rv0584	CCP43322.1	0	42	Possible conserved exported protein
Rv2307A	CCP45091.1	0	49	Hypothetical glycine rich protein
Rv2834c	CCP45635.1	0	35	Probable Sn-glycerol-3-phosphate transport integral membrane protein ABC transporter UgpE
Rv1292	CCP44049.1	1	87	Probable arginyl-tRNA synthetase ArgS (ARGRS) (arginine--tRNA ligase)
Rv1293	CCP44050.1	1	152	Diaminopimelate decarboxylase LysA (DAP decarboxylase)
Rv1294	CCP44051.1	1	274	Probable homoserine dehydrogenase ThrA
Rv1295	CCP44052.1	1	371	Threonine synthase ThrC (ts)
Rv1296	CCP44053.1	0	106	Probable homoserine kinase ThrB
Rv1297	CCP44054.1	0	426	Probable transcription termination factor Rho homolog
Rv0169	CCP42895.1	0	54	Mce-family protein Mce1A
Rv0168	CCP42894.1	0	39	Conserved integral membrane protein YrbE1B
Rv2929	CCP45732.1	0	60	Hypothetical protein
Rv0162c	CCP42888.1	0	42	Probable zinc-type alcohol dehydrogenase (E subunit) AdhE1
Rv3586	CCP46409.1	0	70	Conserved hypothetical protein
Rv3584	CCP46407.1	0	141	Possible conserved lipoprotein LpqE
Rv3585	CCP46408.1	0	63	DNA repair protein RadA (DNA repair protein SMS)
Rv0161	CCP42887.1	0	38	Possible oxidoreductase
Rv0163	CCP42889.1	0	34	Conserved protein
Rv3589	CCP46412.1	1	50	Probable adenine glycosylase MutY
Rv0164	CCP42890.1	0	96	Conserved protein TB18.5
Rv0167	CCP42893.1	0	81	Conserved integral membrane protein YrbE1A
Rv0166	CCP42892.1	0	55	Probable fatty-acid-CoA ligase FadD5 (fatty-acid-CoA synthetase) (fatty-acid-CoA synthase)
Rv1053c	CCP43804.1	0	73	Hypothetical protein
Rv3422c	CCP46244.1	1	156	Conserved hypothetical protein
Rv2856	CCP45657.1	0	49	Possible nickel-transport integral membrane protein NicT
Rv3789	CCP46618.1	0	41	GTRA family protein
Rv2767c	CCP45566.1	0	35	Possible membrane protein
Rv2159c	CCP44935.1	0	12014	Conserved protein
Rv1231c	CCP43987.1	0	67	Probable membrane protein
Rv1840c	CCP44606.1	0	147	PE-PGRS family protein PE_PGRS34
Rv2974c	CCP45779.1	0	56	Conserved hypothetical alanine rich protein
Rv2069	CCP44843.1	0	66	RNA polymerase sigma factor, ECF subfamily, SigC
Rv0384c	CCP43114.1	1	104	Probable endopeptidase ATP binding protein (chain B) ClpB (ClpB protein) (heat shock protein F84.1)
Rv1366	CCP44124.1	0	33	Hypothetical protein
Rv1360	CCP44118.1	0	91	Probable oxidoreductase
Rv0769	CCP43516.1	0	59	Probable dehydrogenase/reductase
Rv0768	CCP43515.1	0	81	Probable aldehyde dehydrogenase NAD dependent AldA (aldehyde dehydrogenase [NAD+])
Rv1897c	CCP44664.1	0	84	Conserved hypothetical protein
Rv1368	CCP44127.1	0	46	Probable conserved lipoprotein LprF
Rv0076c	CCP42799.1	0	61	Probable membrane protein
Rv0943c	CCP43691.1	0	27	Probable monooxygenase
Rv1991A	CCP44763.1	0	179	Antitoxin MazE6
Rv2325c	CCP45112.1	0	243	Conserved hypothetical protein
Rv3879c	CCP46708.1	0	515	ESX-1 secretion-associated protein EspK. Alanine and proline rich protein.
Rv2654c	CCP45452.1	0	32	Possible PhiRv2 prophage protein
Rv0013	CCP42735.1	1	133	Possible anthranilate synthase component II TrpG (glutamine amidotransferase)
Rv0012	CCP42734.1	0	173	Probable conserved membrane protein
Rv0400c	CCP43131.1	0	76	Acyl-CoA dehydrogenase FadE7
Rv2238c	CCP45018.1	0	77	Probable peroxiredoxin AhpE
Rv2370c	CCP45158.1	0	58	Conserved hypothetical protein
Rv3543c	CCP46365.1	0	209	Probable acyl-CoA dehydrogenase FadE29
Rv3265c	CCP46084.1	0	118	dTDP-RHA:a-D-GlcNAc-diphosphoryl polyprenol,a-3-L-rhamnosyl transferase WbbL1 (alpha-L-rhamnose-(1->3)-alpha-D-GlcNAc(1->P)-P-decaprenyl)
Rv3230c	CCP46049.1	0	392	Hypothetical oxidoreductase
Rv3296	CCP46115.1	0	121	Probable ATP-dependent helicase Lhr (large helicase-related protein)
Rv3297	CCP46116.1	0	77	Probable endonuclease VIII Nei
Rv3295	CCP46114.1	0	138	Probable transcriptional regulatory protein (probably TetR-family)
Rv2349c	CCP45137.1	0	31	Probable phospholipase C 3 PlcC
Rv3293	CCP46112.1	0	131	Probable piperideine-6-carboxilic acid dehydrogenase Pcd (piperideine-6-carboxylate dehydrogenase)
Rv2338c	CCP45126.1	0	48	Possible molybdopterin biosynthesis protein MoeW
Rv3171c	CCP45982.1	0	65	Possible non-heme haloperoxidase Hpx
Rv3452	CCP46274.1	0	51	Probable cutinase precursor Cut4
Rv0241c	CCP42970.1	0	189	Probable 3-hydroxyacyl-thioester dehydratase HtdX
Rv3454	CCP46276.1	0	52	Probable conserved integral membrane protein
Rv0366c	CCP43096.1	0	79	Conserved hypothetical protein
Rv0048c	CCP42770.1	0	121	Possible membrane protein
Rv2980	CCP45785.1	0	77	Possible conserved secreted protein
Rv2983	CCP45788.1	0	45	Conserved hypothetical alanine rich protein
Rv2476c	CCP45270.1	0	148	Probable NAD-dependent glutamate dehydrogenase Gdh (NAD-Gdh) (NAD-dependent glutamic dehydrogenase)
Rv2985	CCP45790.1	0	65	Possible hydrolase MutT1
Rv2984	CCP45789.1	1	57	Polyphosphate kinase PPK (polyphosphoric acid kinase) (ATP-polyphosphate phosphotransferase)
Rv0137c	CCP42862.1	0	71	Probable peptide methionine sulfoxide reductase MsrA (protein-methionine-S-oxide reductase) (peptide met(O) reductase)
Rv3191c	CCP46003.1	0	50	Probable transposase
Rv0251c	CCP42980.1	0	576	Heat shock protein Hsp (heat-stress-induced ribosome-binding protein A)
Rv1106c	CCP43859.1	0	50	3-beta-hydroxysteroid dehydrogenase
Rv0633c	CCP43374.1	0	113	Possible exported protein
Rv2701c	CCP45499.1	0	47	Inositol-1-monophosphatase SuhB
Rv3467	CCP46289.1	0	274	Conserved hypothetical protein
Rv1453	CCP44212.1	0	59	Possible transcriptional activator protein
Rv2770c	CCP45569.1	0	56	PPE family protein PPE44
Rv1519	CCP44283.1	0	64	Conserved hypothetical protein
Rv0544c	CCP43282.1	0	65	Possible conserved transmembrane protein
Rv1835c	CCP44601.1	0	73	Conserved hypothetical protein
Rv0037c	CCP42759.1	0	296	Probable conserved integral membrane protein
Rv2367c	CCP45155.1	1	165	Conserved hypothetical protein
Rv2154c	CCP44930.1	0	667	FtsW-like protein FtsW
Rv0976c	CCP43725.1	0	343	Conserved hypothetical protein
Rv2542	CCP45337.1	0	76	Conserved hypothetical protein
Rv0599c	CCP43338.1	0	59	Possible antitoxin VapB27
Rv0454	CCP43185.1	0	63	Conserved hypothetical protein
Rv3223c	CCP46040.1	0	204	Alternative RNA polymerase sigma-E factor (sigma-24) SigH (RPOE)
Rv3411c	CCP46233.1	1	463	Probable inosine-5'-monophosphate dehydrogenase GuaB2 (imp dehydrogenase) (inosinic acid dehydrogenase) (inosinate dehydrogenase) (imp oxidoreductase) (inosine-5'-monophosphate oxidoreductase) (IMPDH) (IMPD)
Rv2927c	CCP45730.1	1	142	Conserved hypothetical protein
Rv0446c	CCP43177.1	0	52	Possible conserved transmembrane protein
Rv1819c	CCP44585.1	0	30	Probable drug-transport transmembrane ATP-binding protein ABC transporter BacA
Rv0426c	CCP43157.1	0	116	Possible transmembrane protein
Rv3357	CCP46178.1	0	28	Antitoxin RelJ
Rv0271c	CCP43000.1	0	560	Probable acyl-CoA dehydrogenase FadE6
Rv3322c	CCP46142.1	0	29	Possible methyltransferase
Rv2960c	CCP45764.1	0	68	Hypothetical protein
Rv0821c	CCP43569.1	1	209	Probable phosphate-transport system transcriptional regulatory protein PhoY2
Rv3252c	CCP46071.1	0	436	Probable transmembrane alkane 1-monooxygenase AlkB (alkane 1-hydroxylase) (lauric acid omega-hydroxylase) (omega-hydroxylase) (fatty acid omega-hydroxylase) (alkane hydroxylase-rubredoxin)
Rv0874c	CCP43622.1	0	175	Conserved hypothetical protein
Rv2660c	CCP45458.1	0	190	Hypothetical protein
Rv0453	CCP43184.1	0	46	PPE family protein PPE11
Rv2548	CCP45343.1	0	114	Possible toxin VapC19
Rv0858c	CCP43606.1	0	40	Probable N-succinyldiaminopimelate aminotransferase DapC (DAP-at)
Rv2902c	CCP45704.1	1	221	Probable ribonuclease HII protein RnhB (RNase HII)
Rv3343c	CCP46164.1	0	96	PPE family protein PPE54
Rv1538c	CCP44302.1	0	45	Probable L-aparaginase AnsA
Rv2538c	CCP45333.1	1	714	3-dehydroquinate synthase AroB
Rv0761c	CCP43508.1	0	244	Possible zinc-containing alcohol dehydrogenase NAD dependent AdhB
Rv2514c	CCP45308.1	0	44	Conserved hypothetical protein
Rv3063	CCP45872.1	0	43	Probable carbon starvation protein A homolog CstA
Rv2964	CCP45768.1	0	379	Probable formyltetrahydrofolate deformylase PurU (formyl-FH(4) hydrolase)
Rv3065	CCP45874.1	0	57	Multidrugs-transport integral membrane protein Mmr
Rv1948c	CCP44715.1	0	36	Hypothetical protein
Rv3066	CCP45875.1	0	76	Probable transcriptional regulatory protein (probably DeoR-family)
Rv3069	CCP45878.1	0	65	Probable conserved transmembrane protein
Rv3470c	CCP46292.1	0	36	Probable acetolactate synthase (large subunit) IlvB2 (AHAS) (acetohydroxy-acid synthase large subunit) (ALS)
Rv3721c	CCP46547.1	0	202	DNA polymerase III (subunit gamma/tau) DnaZ/X
Rv2478c	CCP45272.1	0	37	Conserved hypothetical protein
Rv2961	CCP45765.1	0	94	Probable transposase
Rv0792c	CCP43540.1	0	71	Probable transcriptional regulatory protein (probably GntR-family)
Rv1900c	CCP44667.1	0	168	Probable lignin peroxidase LipJ
Rv3538	CCP46360.1	0	77	Probable dehydrogenase. Possible 2-enoyl acyl-CoA hydratase.
Rv0172	CCP42898.1	0	55	Mce-family protein Mce1D
Rv2387	CCP45175.1	0	58	Conserved protein
Rv3632	CCP46455.1	0	52	Possible conserved membrane protein
Rv3190A	CCP46002.1	0	79	Conserved protein
Rv0170	CCP42896.1	0	53	Mce-family protein Mce1B
Rv3201c	CCP46016.1	0	55	Probable ATP-dependent DNA helicase
Rv3620c	CCP46443.1	0	68	Putative ESAT-6 like protein EsxW (ESAT-6 like protein 10)
Rv0471c	CCP43205.1	0	57	Hypothetical protein
Rv0344c	CCP43074.1	0	68	Probable lipoprotein LpqJ
Rv2843	CCP45644.1	0	80	Probable conserved transmembrane alanine rich protein
Rv2891	CCP45693.1	0	35	Conserved hypothetical protein
Rv0836c	CCP43584.1	0	64	Hypothetical protein
Rv0039c	CCP42761.1	0	121	Possible conserved transmembrane protein
Rv3118	CCP45928.1	0	174	Conserved hypothetical protein SseC1
Rv2461c	CCP45254.1	1	166	Probable ATP-dependent CLP protease proteolytic subunit 1 ClpP1 (endopeptidase CLP)
Rv2712c	CCP45510.1	0	95	Hypothetical protein
Rv3114	CCP45924.1	0	26	Conserved hypothetical protein
Rv3117	CCP45927.1	0	329	Probable thiosulfate sulfurtransferase CysA3 (rhodanese-like protein) (thiosulfate cyanide transsulfurase) (thiosulfate thiotransferase)
Rv3116	CCP45926.1	0	44	Probable molybdenum cofactor biosynthesis protein MoeB2 (MPT-synthase sulfurylase) (molybdopterin synthase sulphurylase)
Rv3111	CCP45921.1	0	22	Probable molybdenum cofactor biosynthesis protein C MoaC1
Rv3110	CCP45920.1	0	23	Probable pterin-4-alpha-carbinolamine dehydratase MoaB1 (PHS) (4-alpha-hydroxy-tetrahydropterin dehydratase) (pterin-4-a-carbinolamine dehydratase) (phenylalanine hydroxylase-stimulating protein) (PHS) (pterin carbinolamine dehydratase) (PCD)
Rv3113	CCP45923.1	0	25	Possible phosphatase
Rv2265	CCP45046.1	0	28	Possible conserved integral membrane protein
Rv0448c	CCP43179.1	0	47	Conserved hypothetical protein
Rv0015c	CCP42737.1	1	615	Transmembrane serine/threonine-protein kinase A PknA (protein kinase A) (STPK A)
Rv2381c	CCP45169.1	0	587	Polyketide synthetase MbtD (polyketide synthase)
Rv2066	CCP44840.1	0	115	Probable bifunctional protein, CobI-COBJ fusion protein: S-adenosyl-L-methionine-precorrin-2 methyl transferase + precorrin-3 methylase
Rv3217c	CCP46033.1	0	126	Probable conserved integral membrane protein
Rv1246c	CCP44002.1	0	56	Toxin RelE
Rv3497c	CCP46319.1	0	88	Mce-family protein Mce4C
Rv2124c	CCP44899.1	0	96	5-methyltetrahydrofolate--homocystein methyltransferase MetH (methionine synthase, vitamin-B12 dependent isozyme) (ms)
Rv2794c	CCP45593.1	0	95	Phosphopantetheinyl transferase PptT (CoA:APO-[ACP]pantetheinephosphotransferase) (CoA:APO-[acyl-carrier protein]pantetheinephosphotransferase)
Rv2282c	CCP45064.1	0	30	Probable transcription regulator (LysR family)
Rv1756c	CCP44522.1	0	515	Putative transposase
Rv3410c	CCP46232.1	1	309	Probable inosine-5'-monophosphate dehydrogenase GuaB3 (imp dehydrogenase) (inosinic acid dehydrogenase) (inosinate dehydrogenase) (imp oxidoreductase) (inosine-5'-monophosphate oxidoreductase) (IMPDH) (IMPD)
Rv3321c	CCP46141.1	0	57	Possible antitoxin VapB44
Rv0367c	CCP43097.1	0	115	Hypothetical protein
Rv3776	CCP46605.1	0	89	Conserved hypothetical protein
Rv2372c	CCP45160.1	0	395	Conserved hypothetical protein
Rv0756c	CCP43503.1	0	125	Unknown protein
Rv3615c	CCP46438.1	0	1500	ESX-1 secretion-associated protein EspC
Rv2225	CCP45003.1	1	180	3-methyl-2-oxobutanoate hydroxymethyltransferase PanB
Rv2226	CCP45004.1	0	50	Conserved protein
Rv2227	CCP45005.1	0	47	Conserved hypothetical protein
Rv2220	CCP44998.1	0	104	Glutamine synthetase GlnA1 (glutamine synthase) (GS-I)
Rv3041c	CCP45850.1	0	58	Probable conserved ATP-binding protein ABC transporter
Rv1167c	CCP43923.1	0	80	Probable transcriptional regulatory protein
Rv0215c	CCP42943.1	0	36	Probable acyl-CoA dehydrogenase FadE3
Rv3549c	CCP46371.1	0	183	Probable short-chain type dehydrogenase/reductase
Rv1793	CCP44559.1	0	224	Putative ESAT-6 like protein EsxN (ESAT-6 like protein 5)
Rv3779	CCP46608.1	0	75	Probable conserved transmembrane protein alanine and leucine rich
Rv1979c	CCP44748.1	0	59	Possible conserved permease
Rv0186	CCP42912.1	0	2567	Probable beta-glucosidase BglS (gentiobiase) (cellobiase) (beta-D-glucoside glucohydrolase)
Rv0208c	CCP42936.1	0	67	Hypothetical methlytransferase (methylase)
Rv2581c	CCP45377.1	0	306	Possible glyoxalase II (hydroxyacylglutathione hydrolase) (GLX II)
Rv1794	CCP44560.1	0	115	Conserved protein
Rv1926c	CCP44693.1	0	668	Immunogenic protein Mpt63 (antigen Mpt63/MPB63) (16 kDa immunoprotective extracellular protein)
Rv3251c	CCP46070.1	0	329	Probable rubredoxin RubA
Rv2162c	CCP44939.1	0	1650	PE-PGRS family protein PE_PGRS38
Rv2910c	CCP45712.1	0	35	Conserved hypothetical protein
Rv2071c	CCP44845.1	0	43	Precorrin-3 methylase CobM (precorrin-4 C11-methyltransferase)
Rv3347c	CCP46168.1	0	278	PPE family protein PPE55
Rv2088	CCP44863.1	0	47	Transmembrane serine/threonine-protein kinase J PknJ (protein kinase J) (STPK J)
Rv1081c	CCP43832.1	0	62	Probable conserved membrane protein
Rv1997	CCP44769.1	0	236	Probable metal cation transporter P-type ATPase A CtpF
Rv1996	CCP44768.1	0	2527	Universal stress protein family protein
Rv1931c	CCP44698.1	0	40	Probable transcriptional regulatory protein
Rv1626	CCP44390.1	1	344	Probable two-component system transcriptional regulator
Rv1629	CCP44393.1	1	163	Probable DNA polymerase I PolA
Rv2082	CCP44857.1	0	58	Conserved hypothetical protein
Rv2083	CCP44858.1	0	57	Conserved hypothetical protein
Rv2084	CCP44859.1	0	47	Hypothetical protein
Rv1490	CCP44251.1	0	38	Probable membrane protein
Rv2086	CCP44861.1	0	207	Conserved hypothetical protein
Rv2087	CCP44862.1	0	25	Conserved hypothetical protein
Rv3841	CCP46670.1	0	587	Bacterioferritin BfrB
Rv2793c	CCP45592.1	1	129	Probable tRNA pseudouridine synthase B TruB (tRNA pseudouridine 55 synthase) (PSI55 synthase) (pseudouridylate synthase) (uracil hydrolyase)
Rv3847	CCP46676.1	1	113	Hypothetical protein
Rv3846	CCP46675.1	0	80	Superoxide dismutase [FE] SodA
Rv3845	CCP46674.1	0	77	Hypothetical protein
Rv3844	CCP46673.1	0	141	Possible transposase
Rv1496	CCP44257.1	1	124	Possible transport system kinase
Rv3849	CCP46678.1	1	133	ESX-1 transcriptional regulatory protein EspR
Rv3848	CCP46677.1	0	167	Probable conserved transmembrane protein
Rv1267c	CCP44023.1	0	34	Probable transcriptional regulatory protein EmbR
Rv2536	CCP45331.1	0	184	Probable conserved transmembrane protein
Rv2710	CCP45508.1	1	1631	RNA polymerase sigma factor SigB
Rv2711	CCP45509.1	0	358	Iron-dependent repressor and activator IdeR
Rv2783c	CCP45582.1	1	196	Bifunctional protein polyribonucleotide nucleotidyltransferase GpsI: guanosine pentaphosphate synthetase + polyribonucleotide nucleotidyltransferase (polynucleotide phosphorylase) (pnpase)
Rv2713	CCP45511.1	0	72	Probable soluble pyridine nucleotide transhydrogenase SthA (STH) (NAD(P)(+) transhydrogenase [B-specific]) (nicotinamide nucleotide transhydrogenase)
Rv2714	CCP45512.1	1	166	Conserved alanine and leucine rich protein
Rv1494	CCP44255.1	0	299	Possible antitoxin MazE4
Rv2716	CCP45514.1	0	106	Conserved protein
Rv3793	CCP46622.1	0	41	Integral membrane indolylacetylinositol arabinosyltransferase EmbC (arabinosylindolylacetylinositol synthase)
Rv1950c	CCP44717.1	0	41	Conserved hypothetical protein
Rv2028c	CCP44801.1	0	304	Universal stress protein family protein
Rv0970	CCP43719.1	0	937	Probable conserved integral membrane protein
Rv0977	CCP43726.1	0	126	PE-PGRS family protein PE_PGRS16
Rv0942	CCP43690.1	0	113	Hypothetical protein
Rv3515c	CCP46337.1	0	138	Fatty-acid-CoA ligase FadD19 (fatty-acid-CoA synthetase) (fatty-acid-CoA synthase)
Rv1482c	CCP44242.1	0	31	Conserved hypothetical protein
Rv0505c	CCP43242.1	1	177	Possible phosphoserine phosphatase SerB1 (PSP) (O-phosphoserine phosphohydrolase) (pspase)
Rv0550c	CCP43288.1	0	30	Possible antitoxin VapB3
Rv1232c	CCP43988.1	0	77	Conserved protein
Rv1198	CCP43954.1	0	238	Putative ESAT-6 like protein EsxL (ESAT-6 like protein 4)
Rv1193	CCP43949.1	1	97	Probable fatty-acid-CoA ligase FadD36 (fatty-acid-CoA synthetase) (fatty-acid-CoA synthase)
Rv1192	CCP43948.1	0	513	Unknown protein
Rv1191	CCP43947.1	0	32	Conserved protein
Rv1190	CCP43946.1	0	29	Conserved hypothetical protein
Rv1197	CCP43953.1	0	314	ESAT-6 like protein EsxK (ESAT-6 like protein 3)
Rv1196	CCP43952.1	0	397	PPE family protein PPE18
Rv1195	CCP43951.1	0	674	PE family protein PE13
Rv2405	CCP45196.1	0	76	Conserved protein
Rv2004c	CCP44776.1	0	891	Conserved protein
Rv2407	CCP45198.1	0	37	Conserved hypothetical protein
Rv1758	CCP44524.1	0	36	Probable cutinase Cut1
Rv2402	CCP45193.1	0	46	Conserved protein
Rv3778c	CCP46607.1	1	81	Possible aminotransferase
Rv1751	CCP44517.1	0	43	Probable oxidoreductase
Rv1752	CCP44518.1	0	44	Conserved hypothetical protein
Rv3667	CCP46490.1	0	61	Acetyl-coenzyme A synthetase Acs (acetate--CoA ligase) (acetyl-CoA synthetase) (acetyl-CoA synthase) (acyl-activating enzyme) (acetate thiokinase) (acetyl-activating enzyme) (acetate--coenzyme A ligase) (acetyl-coenzyme A synthase)
Rv2755c	CCP45554.1	0	77	Possible type I restriction/modification system specificity determinant (fragment) HsdS.1 (S protein)
Rv1177	CCP43933.1	1	1101	Probable ferredoxin FdxC
Rv0489	CCP43223.1	1	87	Probable phosphoglycerate mutase 1 Gpm1 (phosphoglyceromutase) (PGAM) (BPG-dependent PGAM)
Rv1171	CCP43927.1	0	80	Conserved hypothetical protein
Rv1170	CCP43926.1	0	56	N-acetyl-1-D-myo-inosityl-2-amino-2-deoxy-alpha-D-glucopyranoside deacetylase MshB (GlcNAc-Ins deacetylase)
Rv1173	CCP43929.1	1	136	Probable F420 biosynthesis protein FbiC
Rv0482	CCP43216.1	0	43	Probable UDP-N-acetylenolpyruvoylglucosamine reductase MurB (UDP-N-acetylmuramate dehydrogenase)
Rv0223c	CCP42951.1	0	42	Probable aldehyde dehydrogenase
Rv1468c	CCP44227.1	0	265	PE-PGRS family protein PE_PGRS29
Rv0486	CCP43220.1	1	1502	Glycosyltransferase MshA
Rv0487	CCP43221.1	1	284	Conserved hypothetical protein
Rv3669	CCP46492.1	0	67	Probable conserved transmembrane protein
Rv0485	CCP43219.1	0	2685	Possible transcriptional regulatory protein
Rv1032c	CCP43783.1	0	40	Two component sensor histidine kinase TrcS
Rv3385c	CCP46206.1	0	98	Possible antitoxin VapB46
Rv2091c	CCP44866.1	0	205	Probable membrane protein
Rv2044c	CCP44817.1	0	35	Conserved hypothetical protein
Rv3350c	CCP46171.1	0	60	PPE family protein PPE56
Rv0157A	CCP42883.1	0	57	Conserved protein
Rv2115c	CCP44890.1	0	130	Mycobacterial proteasome ATPase Mpa
Rv0046c	CCP42768.1	0	539	myo-inositol-1-phosphate synthase Ino1 (inositol 1-phosphate synthetase) (D-glucose 6-phosphate cycloaldolase) (glucose 6-phosphate cyclase) (glucocycloaldolase)
Rv1778c	CCP44545.1	0	70	Unknown protein
Rv1287	CCP44043.1	0	128	Conserved hypothetical protein
Rv1286	CCP44042.1	0	276	Probable bifunctional enzyme CysN/CysC: sulfate adenyltransferase (subunit 1) + adenylylsulfate kinase
Rv1285	CCP44041.1	0	355	Probable sulfate adenylyltransferase subunit 2 CysD
Rv1284	CCP44040.1	0	135	Beta-carbonic anhydrase
Rv0378	CCP43108.1	0	43	Conserved hypothetical glycine rich protein
Rv0379	CCP43109.1	0	62	Possible protein transport protein SecE2
Rv0808	CCP43556.1	1	708	Amidophosphoribosyltransferase PurF (glutamine phosphoribosylpyrophosphate amidotransferase) (ATASE) (gpatase)
Rv0809	CCP43557.1	1	218	Probable phosphoribosylformylglycinamidine CYCLO-ligase PurM (AIRS) (phosphoribosyl-aminoimidazole synthetase) (air synthase)
Rv3209	CCP46025.1	0	72	Conserved hypothetical threonine and proline rich protein
Rv0807	CCP43555.1	1	55	Conserved hypothetical protein
Rv0804	CCP43552.1	0	61	Conserved hypothetical protein
Rv0377	CCP43107.1	0	43	Probable transcriptional regulatory protein (probably LysR-family)
Rv3052c	CCP45861.1	0	984	Probable NrdI protein
Rv0803	CCP43551.1	1	64	Phosphoribosylformylglycinamidine synthase II PurL (FGAM synthase II)
Rv0800	CCP43548.1	0	41	Probable aminopeptidase PepC
Rv0801	CCP43549.1	0	47	Conserved protein
Rv2754c	CCP45553.1	1	42	Probable thymidylate synthase ThyX (ts) (TSase)
Rv3610c	CCP46433.1	1	369	Membrane-bound protease FtsH (cell division protein)
Rv1225c	CCP43981.1	0	200	Conserved hypothetical protein
Rv0579	CCP43317.1	0	80	Conserved hypothetical protein
Rv0576	CCP43314.1	0	167	Probable transcriptional regulatory protein (possibly ArsR-family)
Rv0577	CCP43315.1	0	217	Conserved protein TB27.3
Rv1573	CCP44337.1	0	36	Probable PhiRv1 phage protein
Rv0625c	CCP43366.1	0	53	Probable conserved transmembrane protein
Rv1575	CCP44339.1	0	315	Probable PhiRv1 phage protein
Rv1574	CCP44338.1	0	81	Probable PhiRv1 phage related protein
Rv0570	CCP43308.1	0	141	Probable ribonucleoside-diphosphate reductase (large subunit) NrdZ (ribonucleotide reductase)
Rv1330c	CCP44088.1	0	55	Nicotinic acid phosphoribosyltransferase PncB1
Rv0396	CCP43126.1	0	33	Hypothetical protein
Rv0397	CCP43127.1	0	40	Conserved 13E12 repeat family protein
Rv3593	CCP46416.1	0	91	Probable conserved lipoprotein LpqF
Rv0395	CCP43125.1	0	45	Hypothetical protein
Rv2306B	CCP45089.1	0	92	Possible conserved membrane protein
Rv0393	CCP43123.1	0	68	Conserved 13E12 repeat family protein
Rv0390	CCP43120.1	0	91	Conserved protein
Rv0391	CCP43121.1	0	56	Probable O-succinylhomoserine sulfhydrylase MetZ (OSH sulfhydrylase)
Rv0036c	CCP42758.1	0	158	Conserved protein
Rv3007c	CCP45813.1	0	62	Possible oxidoreductase
Rv1515c	CCP44279.1	0	38	Conserved hypothetical protein
Rv2839c	CCP45640.1	1	416	Probable translation initiation factor if-2 InfB
Rv2366c	CCP45154.1	0	167	Probable conserved transmembrane protein
Rv3409c	CCP46231.1	1	777	Cholesterol oxidase ChoD (cholesterol-O2 oxidoreductase)
Rv0547c	CCP43285.1	0	53	Possible oxidoreductase
Rv0447c	CCP43178.1	0	40	Probable cyclopropane-fatty-acyl-phospholipid synthase UfaA1 (cyclopropane fatty acid synthase) (CFA synthase)
Rv0427c	CCP43158.1	0	35	Probable exodeoxyribonuclease III protein XthA (exonuclease III) (EXO III) (AP endonuclease VI)
Rv3533c	CCP46355.1	0	263	PPE family protein PPE62
Rv3666c	CCP46489.1	0	46	Probable periplasmic dipeptide-binding lipoprotein DppA
Rv3917c	CCP46746.1	1	82	Probable chromosome partitioning protein ParB
Rv3253c	CCP46072.1	0	49	Possible cationic amino acid transport integral membrane protein
Rv3457c	CCP46279.1	1	204	Probable DNA-directed RNA polymerase (alpha chain) RpoA (transcriptase alpha chain) (RNA polymerase alpha subunit) (DNA-directed RNA nucleotidyltransferase)
Rv2962c	CCP45766.1	0	246	Possible glycosyl transferase
Rv2197c	CCP44974.1	0	230	Probable conserved transmembrane protein
Rv1373	CCP44132.1	0	74	Glycolipid sulfotransferase
Rv1372	CCP44131.1	0	43	Conserved hypothetical protein
Rv0718	CCP43462.1	1	145	30S ribosomal protein S8 RpsH
Rv0719	CCP43463.1	1	169	50S ribosomal protein L6 RplF
Rv1376	CCP44135.1	0	89	Conserved hypothetical protein
Rv1375	CCP44134.1	0	216	Conserved hypothetical protein
Rv0712	CCP43456.1	0	98	Conserved protein
Rv0713	CCP43457.1	0	62	Probable conserved transmembrane protein
Rv0710	CCP43454.1	1	56	30S ribosomal protein S17 RpsQ
Rv0711	CCP43455.1	0	155	Possible arylsulfatase AtsA (aryl-sulfate sulphohydrolase) (arylsulphatase)
Rv0716	CCP43460.1	1	135	50S ribosomal protein L5 RplE
Rv0717	CCP43461.1	1	148	30S ribosomal protein S14 RpsN1
Rv0714	CCP43458.1	1	265	50S ribosomal protein L14 RplN
Rv0715	CCP43459.1	1	248	50S ribosomal protein L24 RplX
Rv0023	CCP42745.1	0	89	Possible transcriptional regulatory protein
Rv0024	CCP42746.1	0	106	Putative secreted protein P60-related protein
Rv0025	CCP42747.1	0	91	Conserved hypothetical protein
Rv0026	CCP42748.1	0	76	Conserved hypothetical protein
Rv0027	CCP42749.1	0	84	Conserved hypothetical protein
Rv0028	CCP42750.1	0	69	Conserved hypothetical protein
Rv0029	CCP42751.1	0	77	Conserved hypothetical protein
Rv0561c	CCP43299.1	1	61	Possible oxidoreductase
Rv3455c	CCP46277.1	1	163	Probable tRNA pseudouridine synthase a TruA (pseudouridylate synthase I) (pseudouridine synthase I) (uracil hydrolyase)
Rv2457c	CCP45250.1	1	148	Probable ATP-dependent CLP protease ATP-binding subunit ClpX
Rv3285	CCP46104.1	1	374	Probable bifunctional protein acetyl-/propionyl-coenzyme A carboxylase (alpha chain) AccA3: biotin carboxylase + biotin carboxyl carrier protein (BCCP)
Rv3284	CCP46103.1	0	230	Conserved hypothetical protein
Rv3134c	CCP45944.1	0	457	Universal stress protein family protein
Rv3281	CCP46100.1	0	103	Probable bifunctional protein acetyl-/propionyl-coenzyme A carboxylase (epsilon chain) AccE5
Rv3280	CCP46099.1	1	72	Probable propionyl-CoA carboxylase beta chain 5 AccD5 (pccase) (propanoyl-CoA:carbon dioxide ligase)
Rv3283	CCP46102.1	1	285	Probable thiosulfate sulfurtransferase SseA (rhodanese) (thiosulfate cyanide transsulfurase) (thiosulfate thiotransferase)
Rv3282	CCP46101.1	0	47	Conserved hypothetical protein
Rv2746c	CCP45545.1	0	45	Probable PGP synthase PgsA3 (CDP-diacylglycerol--glycerol-3-phosphate 3-phosphatidyltransferase) (phosphatidylglycerophosphate synthase)
Rv3449	CCP46271.1	0	35	Probable membrane-anchored mycosin MycP4 (serine protease) (subtilisin-like protease) (subtilase-like) (mycosin-4)
Rv3448	CCP46270.1	0	40	ESX conserved component EccD4. ESX-4 type VII secretion system protein. Probable integral membrane protein.
Rv0394c	CCP43124.1	0	52	Possible secreted protein
Rv2938	CCP45741.1	0	52	Probable daunorubicin-dim-transport integral membrane protein ABC transporter DrrC
Rv1580c	CCP44344.1	0	65	Probable PhiRv1 phage protein
Rv2769c	CCP45568.1	0	41	PE family protein PE27
Rv0626	CCP43367.1	0	171	Possible antitoxin VapB5
Rv0627	CCP43368.1	0	143	Possible toxin VapC5
Rv0156	CCP42881.1	0	45	Probable NAD(P) transhydrogenase (subunit alpha) PntAb [second part; integral membrane protein] (pyridine nucleotide transhydrogenase subunit alpha) (nicotinamide nucleotide transhydrogenase subunit alpha)
Rv0157	CCP42882.1	0	49	Probable NAD(P) transhydrogenase (subunit beta) PntB [integral membrane protein] (pyridine nucleotide transhydrogenase subunit beta) (nicotinamide nucleotide transhydrogenase subunit beta)
Rv0622	CCP43363.1	0	47	Possible membrane protein
Rv0623	CCP43364.1	0	65	Possible antitoxin VapB30
Rv0620	CCP43361.1	0	31	Probable galactokinase GalK (galactose kinase)
Rv0621	CCP43362.1	0	51	Possible membrane protein
Rv2840c	CCP45641.1	0	606	Conserved hypothetical protein
Rv0158	CCP42884.1	0	31	Probable transcriptional regulatory protein (possibly TetR-family)
Rv2184c	CCP44961.1	0	112	Conserved hypothetical protein
Rv2228c	CCP45006.1	1	64	Multifunctional protein. Has RNASE H,alpha-ribazole phosphatase, and acid phosphatase activities.
Rv3123	CCP45933.1	0	62	Hypothetical protein
Rv2886c	CCP45688.1	0	54	Probable resolvase
Rv0470c	CCP43203.1	0	153	Mycolic acid synthase PcaA (cyclopropane synthase)
Rv3200c	CCP46015.1	0	104	Possible transmembrane cation transporter
Rv3639c	CCP46462.1	0	22	Conserved hypothetical protein
Rv1378c	CCP44137.1	0	132	Conserved hypothetical protein
Rv3642c	CCP46465.1	0	106	Hypothetical protein
Rv1329c	CCP44087.1	0	59	Probable ATP-dependent helicase DinG
Rv2462c	CCP45255.1	0	116	Probable trigger factor (TF) protein Tig
Rv3268	CCP46087.1	0	125	Conserved hypothetical protein
Rv2884	CCP45686.1	0	47	Probable transcriptional regulatory protein
Rv0470A	CCP43204.1	0	49	Hypothetical protein
Rv2887	CCP45689.1	0	76	Probable transcriptional regulatory protein
Rv0435c	CCP43166.1	0	113	Putative conserved ATPase
Rv1122	CCP43876.1	0	118	Probable 6-phosphogluconate dehydrogenase,decarboxylating Gnd2
Rv1562c	CCP44326.1	0	36	Maltooligosyltrehalose trehalohydrolase TreZ
Rv0449c	CCP43180.1	0	60	Conserved hypothetical protein
Rv1912c	CCP44679.1	0	53	Possible oxidoreductase FadB5
Rv2380c	CCP45168.1	0	411	Peptide synthetase MbtE (peptide synthase)
Rv2644c	CCP45442.1	0	37	Hypothetical protein
Rv2653c	CCP45451.1	0	39	Possible PhiRv2 prophage protein
Rv3465	CCP46287.1	0	49	dTDP-4-dehydrorhamnose 3,5-epimerase RmlC (dTDP-4-keto-6-deoxyglucose 3,5-epimerase) (dTDP-L-rhamnose synthetase) (thymidine diphospho-4-keto-rhamnose 3,5-epimerase)
Rv3637	CCP46460.1	0	34	Possible transposase
Rv1803c	CCP44569.1	0	82	PE-PGRS family protein PE_PGRS32
Rv3601c	CCP46424.1	0	51	Probable aspartate 1-decarboxylase precursor PanD (aspartate alpha-decarboxylase)
Rv3544c	CCP46366.1	0	172	Probable acyl-CoA dehydrogenase FadE28
Rv1498c	CCP44259.1	0	55	Probable methyltransferase
Rv3631	CCP46454.1	0	45	Possible transferase (possibly glycosyltransferase)
Rv2262c	CCP45043.1	0	40	Conserved hypothetical protein
Rv3231c	CCP46050.1	0	54	Conserved protein
Rv3466	CCP46288.1	0	176	Conserved hypothetical protein
Rv3059	CCP45868.1	0	49	Probable cytochrome P450 136 Cyp136
Rv3264c	CCP46083.1	0	162	D-alpha-D-mannose-1-phosphate guanylyltransferase ManB (D-alpha-D-heptose-1-phosphate guanylyltransferase)
Rv3055	CCP45864.1	0	70	Possible transcriptional regulatory protein (probably TetR-family)
Rv3056	CCP45865.1	0	60	Possible DNA-damage-inducible protein P DinP (DNA polymerase V) (pol IV 2) (DNA nucleotidyltransferase (DNA-directed))
Rv3633	CCP46456.1	0	70	Conserved protein
Rv0372c	CCP43102.1	0	46	Conserved hypothetical protein
Rv0305c	CCP43035.1	0	53	PPE family protein PPE6
Rv2348c	CCP45136.1	0	196	Hypothetical protein
Rv0817c	CCP43565.1	0	31	Probable conserved exported protein
Rv3900c	CCP46729.1	0	71	Conserved hypothetical alanine rich protein
Rv3222c	CCP46039.1	0	229	Conserved hypothetical protein
Rv3641c	CCP46464.1	0	59	Possible cell filamentation protein Fic
Rv2888c	CCP45690.1	0	200	Probable amidase AmiC (aminohydrolase)
Rv0566c	CCP43304.1	0	34	Conserved protein
Rv3279c	CCP46098.1	0	54	Possible bifunctional protein BirA: biotin operon repressor + biotin--[acetyl-CoA-carboxylase] synthetase (biotin--protein ligase)
Rv2475c	CCP45269.1	0	94	Conserved protein
Rv3405c	CCP46227.1	0	37	Possible transcriptional regulatory protein
Rv1107c	CCP43860.1	1	78	Probable exodeoxyribonuclease VII (small subunit) XseB (exonuclease VII small subunit)
Rv3190c	CCP46001.1	0	41	Hypothetical protein
Rv0480c	CCP43214.1	0	64	Possible amidohydrolase
Rv2935	CCP45738.1	0	91	Phenolpthiocerol synthesis type-I polyketide synthase PpsE
Rv2991	CCP45796.1	0	51	Conserved protein
Rv3678A	CCP46502.1	0	103	Conserved hypothetical protein
Rv2109c	CCP44884.1	1	214	Proteasome alpha subunit PrcA; assembles with beta subunit PrcB.
Rv3842c	CCP46671.1	1	931	Probable glycerophosphoryl diester phosphodiesterase GlpQ1 (glycerophosphodiester phosphodiesterase)
Rv3506	CCP46328.1	0	45	Fatty-acid-CoA synthetase FadD17 (fatty-acid-CoA synthase) (fatty-acid-CoA ligase)
Rv2165c	CCP44942.1	1	376	Conserved protein
Rv2070c	CCP44844.1	0	44	Precorrin-6X reductase CobK
Rv3344c	CCP46165.1	0	50	PE-PGRS family protein PE_PGRS49
Rv3505	CCP46327.1	0	70	Probable acyl-CoA dehydrogenase FadE27
Rv3694c	CCP46518.1	0	144	Possible conserved transmembrane protein
Rv2936	CCP45739.1	0	115	Daunorubicin-dim-transport ATP-binding protein ABC transporter DrrA
Rv1930c	CCP44697.1	0	41	Conserved hypothetical protein
Rv2626c	CCP45424.1	0	1515	Hypoxic response protein 1 Hrp1
Rv3678c	CCP46501.1	1	105	Conserved protein
Rv3339c	CCP46160.1	0	72	Probable isocitrate dehydrogenase [NADP] Icd1 (oxalosuccinate decarboxylase) (IDH) (NADP+-specific ICDH) (IDP)
Rv3120	CCP45930.1	0	56	Conserved hypothetical protein
Rv3121	CCP45931.1	0	46	Probable cytochrome P450 141 Cyp141
Rv3122	CCP45932.1	0	108	Hypothetical protein
Rv3022A	CCP45830.1	0	36	PE family protein PE29
Rv3124	CCP45934.1	0	32	Transcriptional regulatory protein MoaR1
Rv1080c	CCP43831.1	1	319	Probable transcription elongation factor GreA (transcript cleavage factor GreA)
Rv3127	CCP45937.1	0	1325	Conserved protein
Rv3654c	CCP46477.1	0	58	Conserved hypothetical protein
Rv2606c	CCP45403.1	1	104	Possible pyridoxine biosynthesis protein SnzP
Rv3701c	CCP46526.1	0	90	Conserved hypothetical protein
Rv0773c	CCP43520.1	0	36	Probable bifunctional acylase GgtA: cephalosporin acylase (GL-7ACA acylase) + gamma-glutamyltranspeptidase (GGT)
Rv2508c	CCP45302.1	0	49	Probable conserved integral membrane leucine and alanine rich protein
Rv2937	CCP45740.1	0	81	Daunorubicin-dim-transport integral membrane protein ABC transporter DrrB
Rv1266c	CCP44022.1	0	81	Probable transmembrane serine/threonine-protein kinase H PknH (protein kinase H) (STPK H)
Rv2539c	CCP45334.1	1	1560	Shikimate kinase AroK (SK)
Rv0354c	CCP43084.1	0	135	PPE family protein PPE7
Rv3920c	CCP46749.1	1	74	Conserved protein similar to jag protein
Rv3402c	CCP46224.1	0	84	Conserved hypothetical protein
Rv3583c	CCP46406.1	1	2768	Possible transcription factor
Rv0760c	CCP43507.1	0	164	Conserved protein
Rv1949c	CCP44716.1	0	38	Conserved hypothetical protein
Rv2515c	CCP45309.1	0	44	Conserved hypothetical protein
Rv3661	CCP46484.1	0	97	Conserved hypothetical protein
Rv2497c	CCP45291.1	0	2117	Probable branched-chain keto acid dehydrogenase E1 component, alpha subunit BkdA
Rv0728c	CCP43473.1	0	46	Possible D-3-phosphoglycerate dehydrogenase SerA2 (phosphoglycerate dehydrogenase) (PGDH)
Rv2102	CCP44877.1	0	59	Conserved hypothetical protein
Rv2013	CCP44785.1	0	44	Transposase
Rv2232	CCP45012.1	0	72	Protein tyrosine kinase transcriptional regulatory protein PtkA
Rv2540c	CCP45335.1	1	2158	Probable chorismate synthase AroF (5-enolpyruvylshikimate-3-phosphate phospholyase)
Rv1327c	CCP44085.1	0	303	Probable glucanase GlgE
Rv2237	CCP45016.1	0	71	Conserved protein
Rv2235	CCP45014.1	0	149	Probable conserved transmembrane protein
Rv2234	CCP45013.1	0	136	Phosphotyrosine protein phosphatase PtpA (protein-tyrosine-phosphatase) (PTPase) (LMW phosphatase)
Rv0936	CCP43684.1	0	63	Phosphate-transport integral membrane ABC transporter PstA2
Rv2575	CCP45371.1	0	201	Possible conserved membrane glycine rich protein
Rv1252c	CCP44008.1	0	46	Probable lipoprotein LprE
Rv1126c	CCP43880.1	0	86	Conserved protein
Rv3418c	CCP46240.1	1	2037	10 kDa chaperonin GroES (protein CPN10) (protein GroES) (BCG-a heat shock protein) (10 kDa antigen)
Rv2189c	CCP44966.1	0	52	Conserved hypothetical protein
Rv3834c	CCP46663.1	1	41	SERYL-tRNA synthetase SerS (serine--tRNA ligase) (SERRS) (serine translase)
Rv3621c	CCP46444.1	0	34	PPE family protein PPE65
Rv0181c	CCP42907.1	0	99	Conserved hypothetical protein
Rv0154c	CCP42879.1	0	58	Probable acyl-CoA dehydrogenase FadE2
Rv1640c	CCP44405.1	0	55	Lysyl-tRNA synthetase 2 LysX
Rv1913	CCP44680.1	0	54	Conserved hypothetical protein
Rv3353c	CCP46174.1	0	24	Conserved hypothetical protein
Rv1033c	CCP43784.1	0	41	Two component transcriptional regulator TrcR
Rv2090	CCP44865.1	0	69	Probable 5'-3' exonuclease
Rv1560	CCP44324.1	0	49	Possible antitoxin VapB11
Rv2527	CCP45321.1	0	58	Possible toxin VapC17
Rv1894c	CCP44661.1	0	250	Conserved hypothetical protein
Rv1618	CCP44382.1	0	75	Probable acyl-CoA thioesterase II TesB1
Rv1619	CCP44383.1	0	80	Conserved membrane protein
Rv1968	CCP44737.1	0	132	Mce-family protein Mce3C
Rv1969	CCP44738.1	0	87	Mce-family protein Mce3D
Rv1614	CCP44378.1	0	61	Possible prolipoprotein diacylglyceryl transferases Lgt
Rv1615	CCP44379.1	0	228	Probable membrane protein
Rv1616	CCP44380.1	0	166	Conserved membrane protein
Rv1617	CCP44381.1	1	114	Probable pyruvate kinase PykA
Rv1610	CCP44374.1	0	73	Possible conserved membrane protein
Rv1611	CCP44375.1	1	115	Probable indole-3-glycerol phosphate synthase TrpC
Rv1612	CCP44376.1	1	54	Tryptophan synthase, beta subunit TrpB
Rv1613	CCP44377.1	1	70	Probable tryptophan synthase, alpha subunit TrpA
Rv3716c	CCP46542.1	1	157	Conserved protein
Rv2933	CCP45736.1	0	87	Phenolpthiocerol synthesis type-I polyketide synthase PpsC
Rv2147c	CCP44923.1	1	96	Conserved hypothetical protein
Rv1561	CCP44325.1	0	37	Possible toxin VapC11
Rv2709	CCP45507.1	1	144	Probable conserved transmembrane protein
Rv0646c	CCP43389.1	0	38	Probable lipase/esterase LipG
Rv2704	CCP45502.1	0	81	Conserved protein
Rv2703	CCP45501.1	1	258	RNA polymerase sigma factor SigA (sigma-A)
Rv2702	CCP45500.1	1	43	Polyphosphate glucokinase PpgK (polyphosphate-glucose phosphotransferase)
Rv1342c	CCP44100.1	0	69	Conserved membrane protein
Rv2700	CCP45498.1	0	109	Possible conserved secreted alanine rich protein
Rv0961	CCP43710.1	0	80	Probable integral membrane protein
Rv0960	CCP43709.1	0	74	Possible toxin VapC9
Rv2331	CCP45118.1	0	33	Hypothetical protein
Rv2067c	CCP44841.1	0	40	Conserved protein
Rv0967	CCP43716.1	0	2650	Copper-sensitive operon repressor CsoR
Rv0969	CCP43718.1	0	3197	Probable metal cation transporter P-type ATPase CtpV
Rv0968	CCP43717.1	0	3325	Conserved protein
Rv2684	CCP45482.1	0	47	Probable arsenic-transport integral membrane protein ArsA
Rv1755c	CCP44521.1	0	44	Probable phospholipase C 4 (fragment) PlcD
Rv2571c	CCP45367.1	0	61	Probable transmembrane alanine and valine and leucine rich protein
Rv3616c	CCP46439.1	0	1355	ESX-1 secretion-associated protein A, EspA
Rv2685	CCP45483.1	0	88	Probable arsenic-transport integral membrane protein ArsB1
Rv3838c	CCP46667.1	0	215	Prephenate dehydratase PheA
Rv1013	CCP43763.1	0	392	Putative polyketide synthase Pks16
Rv1768	CCP44535.1	0	82	PE-PGRS family protein PE_PGRS31
Rv1769	CCP44536.1	0	182	Conserved protein
Rv3040c	CCP45849.1	0	45	Conserved protein
Rv2680	CCP45478.1	1	69	Conserved protein
Rv2143	CCP44919.1	0	70	Conserved hypothetical protein
Rv1760	CCP44526.1	0	68	Possible triacylglycerol synthase (diacylglycerol acyltransferase)
Rv1763	CCP44529.1	0	521	Putative transposase for insertion sequence element IS6110 (fragment)
Rv1168c	CCP43924.1	0	132	PPE family protein PPE17
Rv1766	CCP44533.1	0	108	Conserved protein
Rv1767	CCP44534.1	0	60	Conserved protein
Rv1140	CCP43895.1	0	95	Probable integral membrane protein
Rv0498	CCP43233.1	1	94	Conserved hypothetical protein
Rv1143	CCP43898.1	0	46	Probable alpha-methylacyl-CoA racemase Mcr (2-methylacyl-CoA racemase) (2-arylpropionyl-CoA epimerase)
Rv1144	CCP43899.1	0	34	Probable short-chain type dehydrogenase/reductase
Rv1145	CCP43900.1	0	34	Probable conserved transmembrane transport protein MmpL13a
Rv1146	CCP43901.1	0	41	Probable conserved transmembrane transport protein MmpL13b
Rv1147	CCP43902.1	0	74	Conserved protein
Rv0491	CCP43225.1	1	329	Two component sensory transduction protein RegX3 (transcriptional regulatory protein) (probably LuxR-family)
Rv1149	CCP43904.1	0	170	Possible transposase
Rv1669	CCP44434.1	0	37	Hypothetical protein
Rv0494	CCP43229.1	0	65	Probable transcriptional regulatory protein (probably GntR-family)
Rv0497	CCP43232.1	0	154	Probable conserved transmembrane protein
Rv0496	CCP43231.1	1	140	Conserved hypothetical protein
Rv0560c	CCP43298.1	0	58	Possible benzoquinone methyltransferase (methylase)
Rv0916c	CCP43664.1	0	97	PE family protein PE7
Rv1318c	CCP44075.1	0	37	Possible adenylate cyclase (ATP pyrophosphate-lyase) (adenylyl cyclase)
Rv1186c	CCP43942.1	0	44	Conserved protein
Rv1545	CCP44309.1	0	34	Hypothetical protein
Rv1546	CCP44310.1	0	52	Conserved protein
Rv1547	CCP44311.1	1	46	Probable DNA polymerase III (alpha chain) DnaE1 (DNA nucleotidyltransferase)
Rv0819	CCP43567.1	0	294	GCN5-related N-acetyltransferase, MshD
Rv0818	CCP43566.1	0	505	Transcriptional regulatory protein
Rv1543	CCP44307.1	0	89	Possible fatty acyl-CoA reductase
Rv0362	CCP43092.1	0	42	Possible Mg2+ transport transmembrane protein MgtE
Rv0361	CCP43091.1	0	66	Probable conserved membrane protein
Rv1549	CCP44313.1	0	51	Possible fatty-acid-CoA ligase FadD11.1 (fatty-acid-CoA synthetase) (fatty-acid-CoA synthase)
Rv2992c	CCP45797.1	1	36	Glutamyl-tRNA synthetase GltS (glutamate--tRNA ligase) (glutamyl-tRNA synthase) (GLURS)
Rv0812	CCP43560.1	0	64	Probable amino acid aminotransferase
Rv2699c	CCP45497.1	1	112	Conserved hypothetical protein
Rv3050c	CCP45859.1	0	444	Probable transcriptional regulatory protein (probably AsnC-family)
Rv0569	CCP43307.1	0	182	Conserved protein
Rv0568	CCP43306.1	0	128	Possible cytochrome P450 135B1 Cyp135B1
Rv2995c	CCP45800.1	1	235	Probable 3-isopropylmalate dehydrogenase LeuB (beta-IPM dehydrogenase) (IMDH) (3-IPM-DH)
Rv0567	CCP43305.1	0	64	Probable methyltransferase/methylase
Rv0563	CCP43301.1	1	179	Probable protease transmembrane protein heat shock protein HtpX
Rv0562	CCP43300.1	1	126	Probable polyprenyl-diphosphate synthase GrcC1 (polyprenyl pyrophosphate synthetase)
Rv0255c	CCP42984.1	0	46	Probable cobyric acid synthase CobQ1
Rv0386	CCP43116.1	0	60	Probable transcriptional regulatory protein (probably LuxR/UhpA-family)
Rv1704c	CCP44469.1	0	50	Probable D-serine/alanine/glycine transporter protein CycA
Rv0160c	CCP42886.1	0	39	PE family protein PE4
Rv0389	CCP43119.1	0	51	Probable phosphoribosylglycinamide formyltransferase 2 PurT (GART 2) (gar transformylase 2) (5'-phosphoribosylglycinamide transformylase 2) (formate-dependent gar transformylase)
Rv2782c	CCP45581.1	0	311	Probable zinc protease PepR
Rv1002c	CCP43752.1	0	57	Conserved membrane protein
Rv1403c	CCP44162.1	0	89	Putative methyltransferase
Rv2909c	CCP45711.1	1	129	30S ribosomal protein S16 RpsP
Rv3728	CCP46555.1	0	47	Probable conserved two-domain membrane protein
Rv3075c	CCP45884.1	0	103	Conserved protein
Rv2493	CCP45287.1	0	204	Possible antitoxin VapB38
Rv0551c	CCP43289.1	0	41	Probable fatty-acid-CoA ligase FadD8 (fatty-acid-CoA synthetase) (fatty-acid-CoA synthase)
Rv3725	CCP46552.1	0	76	Possible oxidoreductase
Rv3441c	CCP46263.1	1	72	Probable phospho-sugar mutase / MrsA protein homolog
Rv2619c	CCP45417.1	0	976	Conserved protein
Rv2419c	CCP45210.1	1	58	Glucosyl-3-phosphoglycerate phosphatase GpgP
Rv0504c	CCP43241.1	0	93	Conserved protein
Rv2662	CCP45460.1	0	61	Hypothetical protein
Rv3911	CCP46740.1	0	35	Possible alternative RNA polymerase sigma factor SigM
Rv1233c	CCP43989.1	0	84	Conserved hypothetical membrane protein
Rv0709	CCP43453.1	1	73	50S ribosomal protein L29 RpmC
Rv0708	CCP43452.1	1	67	50S ribosomal protein L16 RplP
Rv2150c	CCP44926.1	1	86	Cell division protein FtsZ
Rv1320c	CCP44077.1	0	41	Possible adenylate cyclase (ATP pyrophosphate-lyase) (adenylyl cyclase)
Rv1389	CCP44148.1	1	83	Probable guanylate kinase Gmk
Rv0701	CCP43445.1	1	574	50S ribosomal protein L3 RplC
Rv0700	CCP43444.1	1	688	30S ribosomal protein S10 RpsJ (transcription antitermination factor NusE)
Rv0703	CCP43447.1	1	319	50S ribosomal protein L23 RplW
Rv0070c	CCP42793.1	0	51	Serine hydroxymethyltransferase GlyA2 (serine methylase 2) (SHMT 2)
Rv0705	CCP43449.1	1	159	30S ribosomal protein S19 RpsS
Rv0704	CCP43448.1	1	195	50S ribosomal protein L2 RplB
Rv0707	CCP43451.1	1	87	30S ribosomal protein S3 RpsC
Rv0706	CCP43450.1	1	111	50S ribosomal protein L22 RplV
Rv2652c	CCP45450.1	0	45	Probable PhiRv2 prophage protein
Rv1456c	CCP44215.1	1	55	Probable unidentified antibiotic-transport integral membrane ABC transporter
Rv0038	CCP42760.1	1	239	Conserved protein
Rv2323c	CCP45110.1	0	64	Conserved protein
Rv0035	CCP42757.1	0	46	Probable fatty-acid-CoA ligase FadD34 (fatty-acid-CoA synthetase) (fatty-acid-CoA synthase)
Rv0034	CCP42756.1	0	44	Conserved hypothetical protein
Rv0033	CCP42755.1	0	48	Probable acyl carrier protein AcpA (ACP)
Rv0032	CCP42754.1	0	38	Possible 8-amino-7-oxononanoate synthase BioF2 (AONS) (8-amino-7-ketopelargonate synthase) (7-keto-8-amino-pelargonic acid synthetase) (7-KAP synthetase) (L-alanine--pimelyl CoA ligase)
Rv0031	CCP42753.1	0	75	Possible remnant of a transposase
Rv0030	CCP42752.1	0	80	Conserved hypothetical protein
Rv3826	CCP46655.1	0	39	Probable fatty-acid-AMP ligase FadD23 (fatty-acid-AMP synthetase) (fatty-acid-AMP synthase)
Rv1412	CCP44171.1	1	65	Probable riboflavin synthase alpha chain RibC (RibE)
Rv0402c	CCP43133.1	0	35	Probable conserved transmembrane transport protein MmpL1
Rv0304c	CCP43034.1	0	54	PPE family protein PPE5
Rv3197A	CCP46011.1	1	92	Probable transcriptional regulatory protein WhiB-like WhiB7
Rv3219	CCP46035.1	1	770	Transcriptional regulatory protein WhiB-like WhiB1. Contains [4FE-4S]2+ cluster.
Rv0373c	CCP43103.1	0	33	Probable carbon monoxyde dehydrogenase (large chain)
Rv3225c	CCP46044.1	0	107	GCN5-related N-acetyltransferase, phosphorylase
Rv3438	CCP46260.1	0	66	Conserved protein
Rv0360c	CCP43090.1	1	44	Conserved protein
Rv0260c	CCP42989.1	0	42	Possible transcriptional regulatory protein
Rv3730c	CCP46557.1	0	37	Conserved hypothetical protein
Rv2889c	CCP45691.1	1	231	Probable elongation factor Tsf (EF-ts)
Rv3822	CCP46651.1	0	112	Conserved hypothetical protein
Rv2867c	CCP45669.1	0	454	GCN5-related N-acetyltransferase
Rv0635	CCP43378.1	0	94	(3R)-hydroxyacyl-ACP dehydratase subunit HadA
Rv0142	CCP42867.1	0	62	Conserved hypothetical protein
Rv0637	CCP43380.1	0	83	(3R)-hydroxyacyl-ACP dehydratase subunit HadC
Rv0636	CCP43379.1	1	97	(3R)-hydroxyacyl-ACP dehydratase subunit HadB
Rv0147	CCP42872.1	0	76	Probable aldehyde dehydrogenase (NAD+) dependent
Rv0146	CCP42871.1	0	49	Possible S-adenosylmethionine-dependent methyltransferase
Rv0145	CCP42870.1	0	86	Possible S-adenosylmethionine-dependent methyltransferase
Rv0144	CCP42869.1	0	79	Probable transcriptional regulatory protein (possibly TetR-family)
Rv0149	CCP42874.1	0	64	Possible quinone oxidoreductase (NADPH:quinone oxidoreductase) (zeta-crystallin)
Rv0148	CCP42873.1	0	72	Probable short-chain type dehydrogenase/reductase
Rv0639	CCP43382.1	1	437	Probable transcription antitermination protein NusG
Rv0638	CCP43381.1	0	394	Probable preprotein translocase SecE1
Rv1578c	CCP44342.1	0	132	Probable PhiRv1 phage protein
Rv3133c	CCP45943.1	0	476	Two component transcriptional regulatory protein DevR (probably LuxR/UhpA-family)
Rv3060c	CCP45869.1	0	90	Probable transcriptional regulatory protein (probably GntR-family)
Rv0439c	CCP43170.1	0	42	Probable dehydrogenase/reductase
Rv0464c	CCP43197.1	0	143	Conserved protein
Rv1833c	CCP44599.1	0	119	Possible haloalkane dehalogenase
Rv3498c	CCP46320.1	0	86	Mce-family protein Mce4B
Rv2772c	CCP45571.1	0	87	Probable conserved transmembrane protein
Rv0546c	CCP43284.1	1	54	Conserved protein
Rv1514c	CCP44278.1	0	31	Conserved hypothetical protein
Rv3714c	CCP46540.1	0	35	Conserved hypothetical protein
Rv3249c	CCP46068.1	0	310	Possible transcriptional regulatory protein (probably TetR-family)
Rv2838c	CCP45639.1	1	450	Probable ribosome-binding factor a RbfA (P15B protein)
Rv2365c	CCP45153.1	0	147	Conserved hypothetical protein
Rv3424c	CCP46246.1	0	125	Hypothetical protein
Rv3546	CCP46368.1	0	74	Probable acetyl-CoA acetyltransferase FadA5 (acetoacetyl-CoA thiolase)
Rv3547	CCP46369.1	0	99	Deazaflavin-dependent nitroreductase Ddn
Rv2045c	CCP44818.1	0	42	Carboxylesterase LipT
Rv0277c	CCP43006.1	0	377	Possible toxin VapC25. Contains PIN domain.
Rv3916c	CCP46745.1	0	363	Conserved hypothetical protein
Rv2893	CCP45695.1	0	35	Possible oxidoreductase
Rv0424c	CCP43155.1	0	152	Hypothetical protein
Rv2870c	CCP45672.1	1	198	Probable 1-deoxy-D-xylulose 5-phosphate reductoisomerase Dxr (DXP reductoisomerase) (1-deoxyxylulose-5-phosphate reductoisomerase)
Rv2748c	CCP45547.1	1	203	Possible cell division transmembrane protein FtsK
Rv0876c	CCP43624.1	1	227	Possible conserved transmembrane protein
Rv3210c	CCP46026.1	0	55	Conserved protein
Rv1127c	CCP43881.1	0	84	Probable pyruvate, phosphate dikinase PpdK
Rv0355c	CCP43085.1	0	57	PPE family protein PPE8
Rv0763c	CCP43510.1	0	203	Possible ferredoxin
Rv2274c	CCP45055.1	0	29	Possible toxin MazF8
Rv0689c	CCP43432.1	0	57	Hypothetical protein
Rv2687c	CCP45485.1	0	138	Antibiotic-transport integral membrane leucine and valine rich protein ABC transporter
Rv3650	CCP46473.1	0	50	PE family protein PE33
Rv1946c	CCP44713.1	0	78	Possible lipoprotein
Rv2516c	CCP45310.1	0	120	Hypothetical protein
Rv3044	CCP45853.1	0	62	Probable FEIII-dicitrate-binding periplasmic lipoprotein FecB
Rv2576c	CCP45372.1	0	368	Possible conserved membrane protein
Rv2721c	CCP45519.1	0	76	Possible conserved transmembrane alanine and glycine rich protein
Rv1534	CCP44298.1	0	43	Probable transcriptional regulator
Rv2274A	CCP45056.1	0	64	Possible antitoxin MazE8
Rv2326c	CCP45113.1	0	292	Possible transmembrane ATP-binding protein ABC transporter
Rv1537	CCP44301.1	0	39	Probable DNA polymerase IV DinX (pol IV 1) (DNA nucleotidyltransferase (DNA-directed))
Rv1906c	CCP44673.1	0	179	Conserved protein
Rv2922c	CCP45724.1	1	89	Probable chromosome partition protein Smc
Rv2390c	CCP45178.1	0	77	Conserved hypothetical protein
Rv1536	CCP44300.1	1	50	Isoleucyl-tRNA synthetase IleS
Rv2188c	CCP44965.1	1	56	Mannosyltransferase PimB
Rv3233c	CCP46052.1	0	41	Possible triacylglycerol synthase (diacylglycerol acyltransferase)
Rv2383c	CCP45171.1	0	1481	Phenyloxazoline synthase MbtB (phenyloxazoline synthetase)
Rv2526	CCP45320.1	0	77	Possible antitoxin VapB17
Rv3207c	CCP46022.1	1	95	Conserved protein
Rv3622c	CCP46445.1	0	39	PE family protein PE32
Rv1244	CCP44000.1	0	111	Probable lipoprotein LpqZ
Rv1393c	CCP44152.1	0	77	Probable monoxygenase
Rv2229c	CCP45007.1	0	76	Conserved protein
Rv3137	CCP45948.1	0	59	Probable monophosphatase
Rv3136	CCP45946.1	0	76	PPE family protein PPE51
Rv3135	CCP45945.1	0	85	PPE family protein PPE50
Rv3753c	CCP46580.1	1	45	Conserved protein
Rv3131	CCP45941.1	0	2336	Conserved protein
Rv0295c	CCP43025.1	0	37	Conserved protein
Rv3139	CCP45950.1	1	417	Probable acyl-CoA dehydrogenase FadE24
Rv0702	CCP43446.1	1	473	50S ribosomal protein L4 RplD
Rv2003c	CCP44775.1	0	408	Conserved hypothetical protein
Rv2521	CCP45315.1	1	200	Probable bacterioferritin comigratory protein Bcp
Rv1539	CCP44303.1	1	450	Probable lipoprotein signal peptidase LspA
Rv1405c	CCP44164.1	0	564	Putative methyltransferase
Rv1966	CCP44735.1	0	102	Mce-family protein Mce3A
Rv3178	CCP45989.1	0	35	Conserved hypothetical protein
Rv3180c	CCP45991.1	0	77	Hypothetical alanine rich protein
Rv1967	CCP44736.1	0	131	Mce-family protein Mce3B
Rv1964	CCP44733.1	0	105	Conserved hypothetical integral membrane protein YrbE3A
Rv2705c	CCP45503.1	0	64	Conserved hypothetical protein
Rv1965	CCP44734.1	0	85	Conserved hypothetical integral membrane protein YrbE3B
Rv2863	CCP45665.1	0	33	Possible toxin VapC23
Rv1343c	CCP44101.1	0	85	Probable conserved lipoprotein LprD
Rv0647c	CCP43390.1	1	46	Conserved protein
Rv0112	CCP42837.1	0	43	Possible GDP-mannose 4,6-dehydratase Gca (GDP-D-mannose dehydratase)
Rv1970	CCP44739.1	0	103	Possible Mce-family lipoprotein LprM (Mce-family lipoprotein Mce3E)
Rv2792c	CCP45591.1	0	118	Possible resolvase
Rv1951c	CCP44718.1	0	43	Conserved hypothetical protein
Rv2529	CCP45323.1	0	37	Hypothetical protein
Rv1632c	CCP44396.1	0	71	Hypothetical protein
Rv1754c	CCP44520.1	0	34	Conserved protein
Rv1961	CCP44729.1	0	48	Hypothetical protein
Rv0095c	CCP42820.1	0	34	Conserved hypothetical protein
Rv1816	CCP44582.1	0	56	Possible transcriptional regulatory protein
Rv1817	CCP44583.1	0	191	Possible flavoprotein
Rv1814	CCP44580.1	0	68	Membrane-bound C-5 sterol desaturase Erg3 (sterol-C5-desaturase)
Rv1730c	CCP44496.1	0	47	Possible penicillin-binding protein
Rv3345c	CCP46166.1	0	56	PE-PGRS family protein PE_PGRS50
Rv1810	CCP44576.1	0	65	Conserved protein
Rv1811	CCP44577.1	0	115	Possible Mg2+ transport P-type ATPase C MgtC
Rv3177	CCP45988.1	0	39	Possible peroxidase (non-haem peroxidase)
Rv2865	CCP45667.1	0	90	Antitoxin RelF
Rv2990c	CCP45795.1	0	173	Hypothetical protein
Rv1518	CCP44282.1	0	37	Conserved hypothetical protein
Rv3258c	CCP46077.1	0	107	Conserved hypothetical protein
Rv0217c	CCP42945.1	0	44	Possible esterase LipW
Rv2518c	CCP45312.1	0	70	Probable L,D-transpeptidase LdtB
Rv3439c	CCP46261.1	0	56	Conserved hypothetical alanine and proline rich protein
Rv2650c	CCP45448.1	0	220	Possible PhiRv2 prophage protein
Rv3159c	CCP45970.1	0	96	PPE family protein PPE53
Rv3043c	CCP45852.1	0	45	Probable cytochrome C oxidase polypeptide I CtaD (cytochrome AA3 subunit 1)
Rv1169c	CCP43925.1	0	317	PE family protein. Possible lipase LipX.
Rv2377c	CCP45165.1	0	149	Putative conserved protein MbtH
Rv0481c	CCP43215.1	0	50	Hypothetical protein
Rv0725c	CCP43470.1	0	87	Conserved hypothetical protein
Rv2550c	CCP45346.1	0	65	Possible antitoxin VapB20
Rv1458c	CCP44217.1	1	72	Probable unidentified antibiotic-transport ATP-binding protein ABC transporter
Rv1087A	CCP43839.1	0	36	Conserved hypothetical protein
Rv2246	CCP45026.1	0	1042	3-oxoacyl-[acyl-carrier protein] synthase 2 KasB (beta-ketoacyl-ACP synthase) (KAS I)
Rv2164c	CCP44941.1	0	1019	Probable conserved proline rich membrane protein
Rv1706c	CCP44471.1	0	79	PPE family protein PPE23
Rv2845c	CCP45646.1	0	57	Probable prolyl-tRNA synthetase ProS (proline--tRNA ligase) (PRORS) (global RNA synthesis factor) (proline translase)
Rv2186c	CCP44963.1	1	49	Conserved hypothetical protein
Rv3873	CCP46702.1	0	394	PPE family protein PPE68
Rv2864c	CCP45666.1	0	35	Possible penicillin-binding lipoprotein
Rv3648c	CCP46471.1	1	773	Probable cold shock protein A CspA
Rv2236c	CCP45015.1	0	49	Probable cobalamin biosynthesis transmembrane protein CobD
Rv1609	CCP44373.1	0	96	Anthranilate synthase component I TrpE (glutamine amidotransferase)
Rv1978	CCP44747.1	0	63	Conserved protein
Rv2627c	CCP45425.1	0	209	Conserved protein
Rv1603	CCP44367.1	1	610	Probable phosphoribosylformimino-5-aminoimidazole carboxamide ribotide isomerase HisA
Rv1602	CCP44366.1	1	491	Probable amidotransferase HisH
Rv1601	CCP44365.1	1	682	Probable imidazole glycerol-phosphate dehydratase HisB
Rv1600	CCP44364.1	1	673	Probable histidinol-phosphate aminotransferase HisC1
Rv1607	CCP44371.1	0	99	Probable ionic transporter integral membrane protein ChaA
Rv1593c	CCP44357.1	1	492	Conserved protein
Rv1605	CCP44369.1	1	764	Probable cyclase HisF
Rv1604	CCP44368.1	0	901	Probable inositol-monophosphatase ImpA (imp)
Rv2394	CCP45182.1	0	293	Probable gamma-glutamyltranspeptidase precursor GgtB (gamma-glutamyltransferase) (glutamyl transpeptidase)
Rv2395	CCP45183.1	0	90	Probable conserved integral membrane protein
Rv2396	CCP45186.1	0	168	PE-PGRS family protein PE_PGRS41
Rv3655c	CCP46478.1	0	38	Conserved hypothetical protein
Rv2391	CCP45179.1	0	596	Ferredoxin-dependent sulfite reductase SirA
Rv2392	CCP45180.1	0	455	Probable 3'-phosphoadenosine 5'-phosphosulfate reductase CysH (PAPS reductase, thioredoxin DEP.) (padops reductase) (3'-phosphoadenylylsulfate reductase) (PAPS sulfotransferase)
Rv2393	CCP45181.1	0	439	Ferrochelatase Che1
Rv3856c	CCP46685.1	0	144	Conserved hypothetical protein
Rv3305c	CCP46124.1	0	75	Possible N-acyl-L-amino acid amidohydrolase AmiA1 (N-acyl-L-amino acid aminohydrolase)
Rv3757c	CCP46584.1	0	89	Possible osmoprotectant (glycine betaine/carnitine/choline/L-proline) transport integral membrane protein ABC transporter ProW
Rv0609A	CCP43349.1	0	103	Conserved hypothetical protein
Rv3710	CCP46536.1	1	266	2-isopropylmalate synthase LeuA (alpha-isopropylmalate synthase) (alpha-IPM synthetase) (IPMS)
Rv0883c	CCP43631.1	0	51	Conserved hypothetical protein
Rv2072c	CCP44846.1	0	49	Precorrin-6Y C(5,15)-methyltransferase (decarboxylating) CobL
Rv3029c	CCP45837.1	1	178	Probable electron transfer flavoprotein (beta-subunit) FixA (beta-ETF) (electron transfer flavoprotein small subunit) (ETFSS)
Rv0254c	CCP42983.1	0	44	Probable bifunctional cobalamin biosynthesis protein CobU: cobinamide kinase + cobinamide phosphate guanylyltransferase
Rv3799c	CCP46628.1	1	1233	Probable propionyl-CoA carboxylase beta chain 4 AccD4 (pccase) (propanoyl-CoA:carbon dioxide ligase)
Rv3412	CCP46234.1	1	573	Conserved hypothetical protein
Rv1705c	CCP44470.1	0	61	PPE family protein PPE22
Rv2785c	CCP45584.1	1	558	30S ribosomal protein S15 RpsO
Rv2758c	CCP45557.1	0	38	Possible antitoxin VapB21
Rv1638A	CCP44403.1	0	81	Conserved hypothetical protein
Rv2775	CCP45574.1	0	62	GCN5-related N-acetyltransferase
Rv2866	CCP45668.1	0	91	Toxin RelG
Rv3921c	CCP46750.1	1	85	Probable conserved transmembrane protein
Rv0958	CCP43706.1	0	191	Possible magnesium chelatase
Rv0959	CCP43707.1	0	161	Conserved hypothetical protein
Rv3154	CCP45965.1	0	140	Probable NADH dehydrogenase I (chain J) NuoJ (NADH-ubiquinone oxidoreductase chain J)
Rv2261c	CCP45042.1	0	42	Conserved hypothetical protein
Rv0954	CCP43702.1	0	147	Probable conserved transmembrane protein
Rv0955	CCP43703.1	0	74	Probable conserved integral membrane protein
Rv0956	CCP43704.1	1	59	Probable 5'-phosphoribosylglycinamide formyltransferase PurN (GART) (gar transformylase) (5'-phosphoribosylglycinamide transformylase)
Rv0957	CCP43705.1	1	61	Probable bifunctional purine biosynthesis protein PurH: phosphoribosylaminoimidazolecarboxamide formyltransferase (AICAR transformylase) (5'-phosphoribosyl-5-aminoimidazole-4-carboxamide formyltransferase) + inosinemonophosphate cyclohydrolase (imp cyclohydrolase) (inosinicase) (imp synthetase) (ATIC)
Rv0951	CCP43699.1	1	196	Probable succinyl-CoA synthetase (beta chain) SucC (SCS-beta)
Rv0952	CCP43700.1	1	191	Probable succinyl-CoA synthetase (alpha chain) SucD (SCS-alpha)
Rv2463	CCP45256.1	0	70	Probable esterase/lipase LipP
Rv1777	CCP44544.1	0	33	Probable cytochrome P450 144 Cyp144
Rv1775	CCP44542.1	0	54	Conserved hypothetical protein
Rv1774	CCP44541.1	0	46	Probable oxidoreductase
Rv1772	CCP44539.1	0	248	Hypothetical protein
Rv1771	CCP44538.1	0	132	L-gulono-1,4-lactone dehydrogenase
Rv1770	CCP44537.1	0	175	Conserved protein
Rv0813c	CCP43561.1	1	181	Conserved protein
Rv2170	CCP44947.1	0	42	GCN5-related N-acetyltransferase
Rv2171	CCP44948.1	0	99	Probable conserved lipoprotein LppM
Rv2173	CCP44950.1	0	50	Probable geranylgeranyl pyrophosphate synthetase IdsA2 (ggppsase) (GGPP synthetase) (geranylgeranyl diphosphate synthase)
Rv2174	CCP44951.1	0	62	Alpha(1->6)mannosyltransferase. Possible conserved integral membrane protein.
Rv2176	CCP44953.1	0	71	Probable transmembrane serine/threonine-protein kinase L PknL (protein kinase L) (STPK L)
Rv2151c	CCP44927.1	0	217	Possible cell division protein FtsQ
Rv2942	CCP45745.1	0	489	Conserved transmembrane transport protein MmpL7
Rv3098A	CCP45908.1	0	120	PemK-like protein
Rv2915c	CCP45717.1	0	51	Conserved protein
Rv2607	CCP45404.1	1	40	Probable pyridoxamine 5'-phosphate oxidase PdxH (PNP/PMP oxidase) (pyridoxinephosphate oxidase) (PNPOX) (pyridoxine 5'-phosphate oxidase)
Rv2602	CCP45399.1	0	175	Possible toxin VapC41. Contains PIN domain.
Rv1159	CCP43914.1	0	94	Mannosyltransferase PimE
Rv0180c	CCP42906.1	0	67	Probable conserved transmembrane protein
Rv1156	CCP43911.1	0	409	Conserved protein
Rv1155	CCP43910.1	0	93	Possible pyridoxamine 5'-phosphate oxidase (PNP/PMP oxidase) (pyridoxinephosphate oxidase) (PNPOX) (pyridoxine 5'-phosphate oxidase)
Rv2011c	CCP44783.1	0	85	Conserved hypothetical protein, probable transcription repressor.
Rv1152	CCP43907.1	0	110	Probable transcriptional regulatory protein
Rv2608	CCP45405.1	0	51	PPE family protein PPE42
Rv1150		0	124	Possible transposase (fragment)
Rv2093c	CCP44868.1	1	105	Sec-independent protein translocase transmembrane protein TatC
Rv3494c	CCP46316.1	0	88	Mce-family protein Mce4F
Rv3018c	CCP45824.1	0	68	PPE family protein PPE46
Rv3352c	CCP46173.1	0	44	Possible oxidoreductase
Rv1553	CCP44317.1	0	30	Probable fumarate reductase [iron-sulfur subunit] FrdB (fumarate dehydrogenase) (fumaric hydrogenase)
Rv0829	CCP43577.1	0	31	Possible transposase (fragment)
Rv1551	CCP44315.1	0	34	Possible acyltransferase PlsB1
Rv1512	CCP44276.1	0	41	Probable nucleotide-sugar epimerase EpiA
Rv1557	CCP44321.1	0	45	Probable conserved transmembrane transport protein MmpL6
Rv1556	CCP44320.1	0	45	Possible regulatory protein
Rv1555	CCP44319.1	0	38	Probable fumarate reductase [membrane anchor subunit] FrdD (fumarate dehydrogenase) (fumaric hydrogenase)
Rv1554	CCP44318.1	0	47	Probable fumarate reductase [membrane anchor subunit] FrdC (fumarate dehydrogenase) (fumaric hydrogenase)
Rv0820	CCP43568.1	0	213	Probable phosphate-transport ATP-binding protein ABC transporter PhoT
Rv1559	CCP44323.1	1	79	Probable threonine dehydratase IlvA
Rv1558	CCP44322.1	0	70	Conserved protein
[truncated: 2,033 more rows]
