# Supplementary material
Source: publisher figshare collection journal article supplement (https://tandf.figshare.com/articles/dataset/_/7936865)
Supplement: Supplementary file 1 [file 1 › temi_a_12040023_sm0021.xlsx]

## Sheet: Sheet1
Supplementary Table S14. Expression levels of Macrophage Genes at 6h, 24h and 48h post infection by M. shigaense, M. triplex and M. tuberculosis
		M. shigaense						M. triplex						M. tuberculosis
ensembl_geneid	gene_symbol	M. shigaense6_RPKM_case	M. shigaense6_RPKM_control	M. shigaense24_RPKM_case	M. shigaense24_RPKM_control	M. shigaense48_RPKM_case	M. shigaense48_RPKM_control	M. triplex6_RPKM_case	M. triplex6_RPKM_control	M. triplex24_RPKM_case	M. triplex24_RPKM_control	M. triplex48_RPKM_case	M. triplex48_RPKM_control	M. tuberculosis6_RPKM_case	M. tuberculosis6_RPKM_control	M. tuberculosis24_RPKM_case	M. tuberculosis24_RPKM_control	M. tuberculosis48_RPKM_case	M. tuberculosis48_RPKM_control
ENSG00000110514	MADD	7.6161	7.34986	11.7726	11.7229	12.2173	11.3417	7.70374	7.34986	10.7958	11.7229	11.6634	11.3417	7.68388	7.34986	10.6598	11.7229	11.6588	11.3417
ENSG00000086015	MAST2	8.81916	8.56828	10.6149	9.31193	11.044	7.75525	8.92004	8.56828	9.74636	9.31193	9.92392	7.75525	8.37112	8.56828	8.63362	9.31193	7.48182	7.75525
ENSG00000169740	ZNF32	11.8196	11.6317	8.21753	10.3117	12.0773	14.6073	10.8285	11.6317	7.60817	10.3117	11.7224	14.6073	10.5063	11.6317	11.1842	10.3117	15.4079	14.6073
ENSG00000261609	GAN	1.33471	1.26903	0.765959	1.12734	0.784838	1.53771	1.09389	1.26903	0.926411	1.12734	1.04913	1.53771	1.13076	1.26903	1.10132	1.12734	1.32033	1.53771
ENSG00000169744	LDB2	0	0.00380428	0.00987145	0.0307839	0	0.00411744	0.0148069	0.00380428	0	0.0307839	0	0.00411744	0	0.00380428	0.0249649	0.0307839	0.00726109	0.00411744
ENSG00000261603	PRSS46	0	0	0	0	0	0	0.0421137	0	0	0	0	0	0	0	0	0	0	0
ENSG00000168298	HIST1H1E	0.0264322	0.108284	0.234148	0.146037	0.155584	0.0585988	0.0526823	0.108284	0.0662744	0.146037	0.189767	0.0585988	0.117728	0.108284	0.0592161	0.146037	0.103339	0.0585988
ENSG00000153714	LURAP1L	0.437954	0.31896	0.948344	0.277816	2.29143	0.550188	0.174578	0.31896	1.28518	0.277816	2.88223	0.550188	0.55268	0.31896	0.534181	0.277816	1.06538	0.550188
ENSG00000168291	PDHB	7.26686	7.09559	9.07147	7.95533	9.03267	7.33836	7.16293	7.09559	9.05141	7.95533	9.56904	7.33836	7.92997	7.09559	9.08604	7.95533	7.7647	7.33836
ENSG00000262552	ALOX5	0	0	0	0	0	0	0	0	0	0	0	0	0	0	0	0	0	0
ENSG00000262556	KIR2DL1	0	0	0	0	0	0	0	0	0	0	0	0	0	0	0	0	0	0
ENSG00000225103	HLA-DQA2	0	0	0	0	0	0	0	0	0	0	0	0	0	0	0	0	0	0
ENSG00000149792	MRPL49	16.5455	16.8488	13.2305	19.0507	12.2247	13.6656	17.0995	16.8488	12.5559	19.0507	11.5232	13.6656	15.4753	16.8488	15.7263	19.0507	12.471	13.6656
ENSG00000149798	CDC42EP2	1.44703	1.21334	5.36727	1.29351	3.57207	1.39764	1.65288	1.21334	6.43598	1.29351	3.23512	1.39764	1.55473	1.21334	0.815187	1.29351	1.5632	1.39764
ENSG00000183054	RGPD6	2.23099	1.75958	1.83268	1.60645	2.03593	2.58878	1.81158	1.75958	2.30503	1.60645	2.76747	2.58878	2.46683	1.75958	2.73829	1.60645	3.72568	2.58878
ENSG00000250565	ATP6V1E2	0.94654	0.965394	0.542756	0.976485	0.577955	1.0318	0.92371	0.965394	0.482537	0.976485	0.532228	1.0318	1.08895	0.965394	0.690714	0.976485	0.882917	1.0318
ENSG00000187961	KLHL17	1.99853	2.30347	2.72867	2.5663	2.56447	1.93078	2.04646	2.30347	2.31905	2.5663	2.2378	1.93078	1.89189	2.30347	2.04012	2.5663	1.94141	1.93078
ENSG00000187969	ZCCHC13	0	0	0	0	0	0	0	0	0	0	0	0	0	0	0	0	0	0
ENSG00000162843	WDR64	0	0	0	0	0	0	0.00419003	0	0	0	0.00377324	0	0	0	0.00941938	0	0.00410947	0
ENSG00000162849	KIF26B	0.32414	0.36886	0.0867794	0.335622	0.0629922	0.555718	0.211042	0.36886	0.0722424	0.335622	0.095671	0.555718	0.269493	0.36886	0.158144	0.335622	0.211208	0.555718
ENSG00000149243	KLHL35	2.12779	2.81653	1.10841	1.31238	1.18718	1.39439	3.00065	2.81653	0.79411	1.31238	1.06285	1.39439	2.58534	2.81653	0.891917	1.31238	1.0006	1.39439
ENSG00000184702	2018-09-05	9.90449	12.9969	5.53222	13.3946	4.30143	10.5005	8.22357	12.9969	4.26361	13.3946	3.77205	10.5005	9.01665	12.9969	7.44745	13.3946	7.57508	10.5005
ENSG00000184708	EIF4ENIF1	4.39176	4.71424	2.86424	3.60797	3.24887	3.73514	4.65505	4.71424	2.67103	3.60797	3.25026	3.73514	4.2149	4.71424	3.83937	3.60797	3.46329	3.73514
ENSG00000184709	LRRC26	0.652169	0.878856	0.304063	1.81741	0.259766	0.323408	0.667026	0.878856	0.157783	1.81741	0.215627	0.323408	0.687966	0.878856	0.576733	1.81741	0.385811	0.323408
ENSG00000163462	TRIM46	2.91443	3.26176	2.60609	3.08878	2.83601	2.83945	3.34736	3.26176	2.29794	3.08878	2.53324	2.83945	2.99007	3.26176	3.34673	3.08878	2.42306	2.83945
ENSG00000163463	KRTCAP2	26.4003	27.0439	36.9582	32.5301	41.5852	27.2081	28.6117	27.0439	33.1742	32.5301	34.9982	27.2081	25.2177	27.0439	30.3074	32.5301	27.6375	27.2081
ENSG00000163464	CXCR1	0	0	0	0.00767948	0	0	0.016622	0	0.0139403	0.00767948	0	0	0	0	0	0.00767948	0	0
ENSG00000163466	ARPC2	98.7124	101.953	116.959	111.864	113.011	99.904	95.9681	101.953	115.56	111.864	118.454	99.904	100.694	101.953	112.673	111.864	94.5246	99.904
ENSG00000163467	TSACC	1.06072	0.667063	0.478061	0.496942	0.469443	0.536324	0.76035	0.667063	0.513255	0.496942	0.400809	0.536324	0.99462	0.667063	0.562819	0.496942	0.87305	0.536324
ENSG00000163468	CCT3	119.77	118.513	74.346	113.669	72.6087	94.7821	123.65	118.513	74.1234	113.669	72.0924	94.7821	117.953	118.513	121.499	113.669	84.8206	94.7821
ENSG00000162599	NFIA	0.00763402	0.0312741	0.0135251	0.0105445	0.00802411	0.0126932	0.0114116	0.0312741	0.00957052	0.0105445	0.0222657	0.0126932	0	0.0312741	0.0363428	0.0105445	0.0130575	0.0126932
ENSG00000162598	C1orf87	0.00938456	0.0144171	0	0.0043208	0	0.176843	0.00935224	0.0144171	0	0.0043208	0	0.176843	0.0104497	0.0144171	0.0420485	0.0043208	0.110069	0.176843
ENSG00000162592	CCDC27	0.304346	0.458385	0.0475771	0.708871	0.0827972	0.525885	0.249775	0.458385	0.0673322	0.708871	0.0883651	0.525885	0.299019	0.458385	0.521398	0.708871	0.454949	0.525885
ENSG00000029364	SLC39A9	15.6666	15.3067	9.7338	12.1156	10.0832	12.4831	14.3	15.3067	10.914	12.1156	12.4105	12.4831	16.0816	15.3067	12.2563	12.1156	13.6471	12.4831
ENSG00000029363	BCLAF1	23.7488	23.1913	10.0513	18.0584	11.0425	14.2572	20.6044	23.1913	13.3538	18.0584	12.6623	14.2572	31.2057	23.1913	23.7323	18.0584	16.1923	14.2572
ENSG00000162595	DIRAS3	0.0105166	0	0	0	0	0	0	0	0	0	0.0188758	0	0	0	0	0	0	0
ENSG00000162594	IL23R	0	0.0070954	0	0.00637948	0	0.015359	0	0.0070954	0	0.00637948	0	0.015359	0	0.0070954	0	0.00637948	0.00677136	0.015359
ENSG00000118640	VAMP8	76.2902	81.2036	104.417	131.353	115.754	110.493	70.6596	81.2036	86.1134	131.353	102.81	110.493	70.4328	81.2036	107.314	131.353	89.2535	110.493
ENSG00000069329	VPS35	8.01545	7.34367	6.45203	9.3833	7.07918	9.3462	6.79477	7.34367	7.33231	9.3833	8.11063	9.3462	8.4713	7.34367	11.2351	9.3833	9.86791	9.3462
ENSG00000159961	OR3A3	0	0	0	0	0	0	0	0	0.0359043	0	0	0	0	0	0	0	0	0
ENSG00000115073	ACTR1B	12.8722	13.3599	17.171	18.6168	15.9609	25.6609	12.4267	13.3599	14.5066	18.6168	13.9576	25.6609	11.38	13.3599	18.9272	18.6168	30.8523	25.6609
ENSG00000253148	RGS21	0	0	0	0	0	0	0	0	0	0	0	0	0	0	0	0	0	0
ENSG00000213853	EMP2	0.149943	0.146254	0.130718	0.425175	0.124083	0.224249	0.270391	0.146254	0.151179	0.425175	0.166602	0.224249	0.251766	0.146254	0.285264	0.425175	0.174469	0.224249
ENSG00000213859	KCTD11	1.97223	1.71343	3.04838	2.64273	2.53908	3.08326	1.87734	1.71343	2.44411	2.64273	1.93472	3.08326	1.75686	1.71343	2.23967	2.64273	2.22012	3.08326
ENSG00000229300	C6orf48	0	0	0	0	0	0	0	0	0	0	0	0	0	0	0	0	0	0
ENSG00000055070	SZRD1	49.1391	50.2774	76.9145	56.2651	68.2101	48.413	53.0035	50.2774	70.3718	56.2651	63.2178	48.413	46.2132	50.2774	52.3699	56.2651	47.584	48.413
ENSG00000155719	OTOA	0.59004	0.64557	0.145332	0.190827	0.121013	0.558331	0.599481	0.64557	0.0866007	0.190827	0.129151	0.558331	0.51599	0.64557	0.135411	0.190827	0.753932	0.558331
ENSG00000162337	LRP5	3.04978	3.68544	0.679881	3.43137	0.832187	2.95523	3.12314	3.68544	0.56268	3.43137	0.652518	2.95523	2.72123	3.68544	2.1455	3.43137	1.73718	2.95523
ENSG00000155714	PDZD9	0.0622634	0.0956522	0	0.086001	0	0	0.170635	0.0956522	0.0130096	0.086001	0.0139692	0	0.0866624	0.0956522	0.0523083	0.086001	0.197782	0
ENSG00000182010	RTKN2	0.0782335	0.0823499	0.0269511	0.204113	0.0493387	0.122853	0.0779641	0.0823499	0.0581208	0.204113	0.0468059	0.122853	0.125829	0.0823499	0.14849	0.204113	0.135938	0.122853
ENSG00000182013	PNMAL1	0.011228	0	0	0.00516952	0	0	0	0	0	0.00516952	0	0	0	0	0	0.00516952	0.0109741	0
ENSG00000164659	KIAA1324L	0.276145	0.3221	0.178937	0.452059	0.146203	0.734074	0.25481	0.3221	0.25644	0.452059	0.199633	0.734074	0.395746	0.3221	0.52127	0.452059	0.662262	0.734074
ENSG00000178372	CALML5	0	0	0.25179	0	0.0796695	0	0	0	0	0	0	0	0.0527493	0	0	0	0	0
ENSG00000164651	SP8	0	0	0	0	0	0	0	0	0	0	0	0	0	0	0	0	0	0
ENSG00000164654	MIOS	4.22155	3.90895	2.98131	3.52877	3.07166	4.73429	3.65573	3.90895	3.22608	3.52877	3.58052	4.73429	4.64217	3.90895	5.10611	3.52877	5.26186	4.73429
ENSG00000114978	MOB1A	45.6169	43.081	28.8013	35.4718	33.0083	37.073	44.0725	43.081	36.9084	35.4718	42.4092	37.073	51.4993	43.081	46.265	35.4718	40.8181	37.073
ENSG00000161021	MAML1	7.49807	7.58188	4.22806	7.41206	4.14238	8.33724	7.74112	7.58188	4.02641	7.41206	4.13353	8.33724	7.47158	7.58188	5.87907	7.41206	6.39709	8.33724
ENSG00000254692	TM9SF1	26.6484	24.9425	35.8557	27.7673	41.2757	28.1457	27.0396	24.9425	34.8291	27.7673	40.1709	28.1457	23.9474	24.9425	25.1085	27.7673	26.6752	28.1457
ENSG00000257341	CRIP1	9.04833	11.4253	6.73609	23.0554	13.4947	18.2628	10.427	11.4253	7.09437	23.0554	9.23112	18.2628	8.68048	11.4253	11.6377	23.0554	15.239	18.2628
ENSG00000119509	INVS	2.07459	2.08047	1.07498	2.1767	1.16299	2.61657	1.98793	2.08047	1.19206	2.1767	1.4769	2.61657	2.38039	2.08047	2.42814	2.1767	2.17393	2.61657
ENSG00000165309	ARMC3	0.0068423	0.0140153	0.00303061	0.0157515	0.00863032	0.030338	0.0170468	0.0140153	0	0.0157515	0.00614046	0.030338	0.00761886	0.0140153	0.0268254	0.0157515	0.0635324	0.030338
ENSG00000165304	MELK	5.49956	5.6256	1.44547	9.36159	1.22529	4.83075	6.10966	5.6256	1.81836	9.36159	1.52463	4.83075	5.87699	5.6256	7.40896	9.36159	3.1372	4.83075
ENSG00000165300	SLITRK5	0.855327	0.707024	1.6423	0.899555	3.2493	0.943295	0.575465	0.707024	1.66197	0.899555	3.17947	0.943295	0.652661	0.707024	1.06023	0.899555	1.09061	0.943295
ENSG00000101608	MYL12A	140.871	142.449	209.437	153.129	201.677	157.215	131.72	142.449	203.901	153.129	220.525	157.215	143.032	142.449	168.641	153.129	177.585	157.215
ENSG00000101605	MYOM1	0.205188	0.216613	0.240489	0.308123	0.645029	0.612354	0.157294	0.216613	0.298132	0.308123	0.62608	0.612354	0.235506	0.216613	0.449076	0.308123	0.72815	0.612354
ENSG00000121335	PRB2	0.0115853	0.0593265	0.0205256	0.0320043	0	0.012842	0	0.0593265	0.00968274	0.0320043	0	0.012842	0.0129002	0.0593265	0	0.0320043	0.0792638	0.012842
ENSG00000198791	CNOT7	18.7455	18.6322	11.0796	15.8797	14.3703	15.3896	16.9131	18.6322	12.7824	15.8797	18.0968	15.3896	20.3472	18.6322	19.9956	15.8797	17.7691	15.3896
ENSG00000198792	TMEM184B	11.3182	11.3586	18.5199	13.2229	23.6208	13.0505	12.0462	11.3586	16.6985	13.2229	21.6402	13.0505	10.6121	11.3586	10.9258	13.2229	13.8977	13.0505
ENSG00000198793	MTOR	7.40666	6.85796	6.31545	7.95699	6.63842	5.83399	7.67804	6.85796	6.11592	7.95699	7.13554	5.83399	7.36459	6.85796	7.68671	7.95699	5.10394	5.83399
ENSG00000198794	SCAMP5	5.47893	7.20275	2.35698	9.27887	5.10828	13.6235	4.51823	7.20275	1.88575	9.27887	4.39735	13.6235	4.71659	7.20275	6.19445	9.27887	10.3149	13.6235
ENSG00000198795	ZNF521	6.77527	6.71363	1.211	5.59411	1.46916	9.85715	4.96427	6.71363	0.830444	5.59411	1.64276	9.85715	6.1631	6.71363	4.1196	5.59411	6.84372	9.85715
ENSG00000197779	ZNF81	1.50403	1.20311	1.19519	1.24239	1.09112	1.40021	1.40334	1.20311	1.62265	1.24239	1.41592	1.40021	1.69389	1.20311	1.91874	1.24239	1.99127	1.40021
ENSG00000198797	BRINP2	0.015747	0	0	0.00966686	0	0.0116367	0	0	0	0.00966686	0	0.0116367	0	0	0	0.00966686	0	0.0116367
ENSG00000198798	MAGEB3	0	0	0	0	0	0	0	0	0	0	0	0	0	0	0	0	0	0
ENSG00000197776	KLHDC1	0.393449	0.424166	0.0794904	0.286026	0.168324	0.573853	0.343942	0.424166	0.12115	0.286026	0.198227	0.573853	0.52265	0.424166	0.309279	0.286026	0.499247	0.573853
ENSG00000197775	DHRS4-AS1	3.26838	2.14705	1.05283	3.16163	1.66564	3.97057	2.33592	2.14705	1.11749	3.16163	1.89617	3.97057	2.57326	2.14705	3.18033	3.16163	3.69465	3.97057
ENSG00000175550	DRAP1	43.2784	44.7036	234.758	55.7467	272.04	38.5982	48.272	44.7036	215.459	55.7467	243.069	38.5982	35.1551	44.7036	58.9421	55.7467	42.592	38.5982
ENSG00000175556	LONRF3	6.09063	4.78497	7.84034	3.48339	5.86918	4.73446	4.42547	4.78497	7.33708	3.48339	6.73896	4.73446	4.80741	4.78497	5.3025	3.48339	5.90774	4.73446
ENSG00000197771	MCMBP	20.4944	17.7936	8.40487	11.2891	8.82362	11.6161	18.4618	17.7936	8.86053	11.2891	10.6983	11.6161	21.7399	17.7936	14.0729	11.2891	9.9081	11.6161
ENSG00000161682	FAM171A2	0.410133	0.644858	0.542413	1.12767	0.757748	0.877228	0.42599	0.644858	0.468306	1.12767	0.642816	0.877228	0.347335	0.644858	0.821764	1.12767	0.858183	0.877228
ENSG00000168297	PXK	14.3138	11.9675	6.55526	12.438	6.11947	18.7059	14.363	11.9675	6.57792	12.438	7.36465	18.7059	14.992	11.9675	11.3356	12.438	13.8241	18.7059
ENSG00000100288	CHKB	6.38756	6.0636	6.38242	8.16503	5.94871	8.37472	7.39226	6.0636	6.95738	8.16503	5.81866	8.37472	7.08192	6.0636	8.35523	8.16503	9.9018	8.37472
ENSG00000183864	TOB2	14.9086	16.8004	19.5121	19.0563	18.942	21.287	15.9172	16.8004	19.1007	19.0563	17.4217	21.287	14.9962	16.8004	15.8903	19.0563	18.13	21.287
ENSG00000183862	CNGA2	0	0	0.0129715	0.0202257	0	0	0	0	0	0.0202257	0	0	0	0	0	0.0202257	0.00715604	0
ENSG00000167680	SEMA6B	0.351841	0.374759	1.44203	0.293748	1.73569	0.468009	0.345955	0.374759	1.0743	0.293748	1.32616	0.468009	0.370879	0.374759	0.162901	0.293748	0.334718	0.468009
ENSG00000124217	MOCS3	7.47919	7.09799	5.9524	5.64335	4.74167	5.76404	7.10852	7.09799	5.39021	5.64335	5.33325	5.76404	7.05909	7.09799	6.44885	5.64335	5.02468	5.76404
ENSG00000124214	STAU1	22.6558	21.7649	25.7563	21.3618	24.3977	20.3189	20.885	21.7649	27.835	21.3618	26.9075	20.3189	21.0095	21.7649	23.3275	21.3618	20.3595	20.3189
ENSG00000124215	CDH26	0.0828674	0.0774901	0.0223415	0.0729891	0.0272667	0.107831	0.0323147	0.0774901	0.0271012	0.0729891	0.071134	0.107831	0.0962842	0.0774901	0.0565016	0.0729891	0.112687	0.107831
ENSG00000124212	PTGIS	0	0	0	0.00684946	0	0.00412261	0	0	0	0.00684946	0	0.00412261	0	0	0	0.00684946	0	0.00412261
ENSG00000247596	TWF2	39.4395	45.1928	96.6999	58.1472	90.127	67.9661	37.3425	45.1928	80.529	58.1472	74.8615	67.9661	31.5403	45.1928	54.2576	58.1472	68.4902	67.9661
ENSG00000231618	PPT2	0	0	0	0	0	0	0	0	0	0	0	0	0	0	0	0	0	0
ENSG00000161970	RPL26	155.796	167.203	76.4819	117.7	65.0828	130.194	157.384	167.203	76.6631	117.7	64.5556	130.194	173.795	167.203	130.644	117.7	126.842	130.194
ENSG00000161973	CCDC42	0	0.0120949	0	0.0326236	0	0.026181	0.0235376	0.0120949	0	0.0326236	0	0.026181	0	0.0120949	0.0529136	0.0326236	0	0.026181
ENSG00000255275	RP13-279N23.2	1.08757	1.10412	1.33784	1.55686	1.62536	1.38453	0.946569	1.10412	1.21857	1.55686	1.38091	1.38453	0.893707	1.10412	1.28208	1.55686	1.18367	1.38453
ENSG00000160087	UBE2J2	15.9715	16.1906	15.966	15.3355	15.2926	11.993	16.544	16.1906	14.5226	15.3355	13.4559	11.993	13.3516	16.1906	12.3857	15.3355	10.1143	11.993
ENSG00000036054	TBC1D23	5.42018	4.96317	5.86487	4.70639	6.63739	5.08689	5.37351	4.96317	7.46287	4.70639	8.0746	5.08689	7.22453	4.96317	6.82248	4.70639	7.05177	5.08689
ENSG00000002587	HS3ST1	0.0152456	0.0338305	0.234091	0.0491352	0.371772	0.0309822	0.0126609	0.0338305	0.155027	0.0491352	0.262235	0.0309822	0.00565863	0.0338305	0.0796945	0.0491352	0.0794718	0.0309822
ENSG00000002586	CD99	60.5419	64.7423	50.1494	88.2253	61.3961	96.3564	63.4312	64.7423	45.3981	88.2253	51.4854	96.3564	48.6074	64.7423	50.9788	88.2253	72.7655	96.3564
ENSG00000177954	RPS27	766.473	901.606	456.174	701.045	467.655	745.775	812.27	901.606	476.954	701.045	417.062	745.775	727.464	901.606	674.543	701.045	772.02	745.775
ENSG00000177951	BET1L	15.4708	15.0096	13.2105	13.7964	11.719	12.7547	15.1983	15.0096	11.603	13.7964	10.4707	12.7547	13.9414	15.0096	13.0633	13.7964	13.1654	12.7547
ENSG00000198242	RPL23A	234.348	266.537	114.352	229.049	102.597	221.351	234.895	266.537	117.499	229.049	93.8432	221.351	251.888	266.537	229.279	229.049	225.876	221.351
ENSG00000198246	SLC29A3	10.2896	10.3087	13.9361	7.8092	12.9882	8.63786	6.24803	10.3087	12.1147	7.8092	12.1133	8.63786	7.78174	10.3087	6.80643	7.8092	11.1148	8.63786
ENSG00000092140	G2E3	1.67029	1.67886	0.656386	1.67528	0.964188	1.53028	1.60472	1.67886	0.908173	1.67528	1.04203	1.53028	2.31618	1.67886	1.76433	1.67528	1.61028	1.53028
ENSG00000135916	ITM2C	139.706	154.811	59.1123	185.504	63.91	269.253	141.474	154.811	54.2304	185.504	48.8666	269.253	123.016	154.811	112.847	185.504	227.02	269.253
ENSG00000135914	HTR2B	0.249435	0.189232	0.28643	0.195659	0.264123	0.419858	0.266989	0.189232	0.277963	0.195659	0.514024	0.419858	0.205736	0.189232	0.206966	0.195659	0.52371	0.419858
ENSG00000135913	USP37	4.03594	3.86127	1.15151	2.38781	1.23204	2.59957	3.85733	3.86127	1.48964	2.38781	1.71577	2.59957	4.38955	3.86127	2.5469	2.38781	2.56286	2.59957
ENSG00000135912	TTLL4	6.45563	4.88338	3.49675	3.77159	3.69386	2.66363	8.91419	4.88338	3.34425	3.77159	3.16205	2.66363	8.01807	4.88338	4.63637	3.77159	2.53602	2.66363
ENSG00000092148	HECTD1	7.68009	7.65691	5.28016	6.06418	4.73532	6.62013	6.30476	7.65691	5.74847	6.06418	6.50091	6.62013	8.27821	7.65691	6.31363	6.06418	7.30722	6.62013
ENSG00000034693	PEX3	2.36254	2.56309	0.852028	1.73696	0.895153	1.5216	1.78674	2.56309	0.694608	1.73696	1.09781	1.5216	3.11938	2.56309	2.13386	1.73696	1.32342	1.5216
ENSG00000135919	SERPINE2	10.8659	8.47783	1.27348	4.08735	0.95961	8.90666	24.8641	8.47783	1.8081	4.08735	0.818894	8.90666	19.3076	8.47783	5.77202	4.08735	12.0938	8.90666
ENSG00000176396	EID2	4.36772	4.366	7.51556	4.99606	5.14357	5.2943	4.26917	4.366	6.76689	4.99606	5.34847	5.2943	4.72347	4.366	5.83111	4.99606	5.33367	5.2943
ENSG00000176390	CRLF3	5.98073	5.26516	5.72545	4.40066	5.93422	5.85287	5.66883	5.26516	6.75523	4.40066	7.08278	5.85287	6.00853	5.26516	6.08604	4.40066	6.53937	5.85287
ENSG00000176393	RNPEP	19.3686	21.1483	24.8975	33.8649	30.6553	29.1955	18.604	21.1483	20.9818	33.8649	26.6954	29.1955	16.5465	21.1483	27.9715	33.8649	24.8174	29.1955
ENSG00000176399	DMRTA1	0	0	0	0	0	0	0.00742604	0	0	0	0	0	0	0	0	0	0	0
ENSG00000083635	NUFIP1	3.79096	4.02255	1.32117	2.17219	1.24412	1.93643	3.04956	4.02255	1.39549	2.17219	1.46643	1.93643	4.11535	4.02255	3.0617	2.17219	1.78294	1.93643
ENSG00000063515	GSC2	0	0	0	0	0	0.0222653	0	0	0	0	0	0.0222653	0	0	0	0	0	0.0222653
ENSG00000247626	MARS2	10.8647	11.0712	4.59061	6.21736	3.33736	5.58474	10.7795	11.0712	4.85822	6.21736	3.64176	5.58474	10.8537	11.0712	7.45566	6.21736	4.22756	5.58474
ENSG00000167536	DHRS13	2.4527	3.18328	1.74192	3.5695	2.04464	2.29688	2.22652	3.18328	1.39606	3.5695	1.60656	2.29688	1.89919	3.18328	1.81581	3.5695	1.59128	2.29688
ENSG00000167535	CACNB3	0.188551	0.210933	0.318635	0.384642	0.407347	0.379422	0.167666	0.210933	0.353964	0.384642	0.325404	0.379422	0.2261	0.210933	0.357424	0.384642	0.527348	0.379422
ENSG00000188886	ASTL	0.150539	0.128481	0	0.0924138	0.042195	0.0695285	0.0875119	0.128481	0.0209695	0.0924138	0.0450325	0.0695285	0.139687	0.128481	0.0281044	0.0924138	0.0490453	0.0695285
ENSG00000188883	KLRG2	0.311664	0.309524	0.0167325	0.191326	0.0635326	0.17797	0.272943	0.309524	0	0.191326	0.0339025	0.17797	0.189292	0.309524	0.137529	0.191326	0.073847	0.17797
ENSG00000188888	GPR179	0.0837175	0.062357	0.0247203	0.0327047	0.0127993	0.0956108	0.063204	0.062357	0.00424056	0.0327047	0.0273201	0.0956108	0.0960438	0.062357	0.0369422	0.0327047	0.0421523	0.0956108
ENSG00000094796	KRT31	0.0130008	0.02663	0.0345501	0	0	0	0	0.02663	0.0434631	0	0	0	0	0.02663	0.0145629	0	0	0
ENSG00000237289	CKMT1B	0	0.00539496	0	0.0194024	0.0177178	0.0175172	0.0157485	0.00539496	0	0.0194024	0	0.0175172	0	0.00539496	0	0.0194024	0.0102971	0.0175172
ENSG00000237284	MAS1L	0	0	0	0	0	0	0	0	0	0	0	0	0	0	0	0	0	0
ENSG00000272252	AC242426.1	0	0	0	0	0	0	0	0	0	0	0	0	0	0	0	0	0	0
ENSG00000101327	PDYN	0	0	0.0138827	0	0	0	0	0	0	0	0	0	0	0	0	0	0.0306348	0
ENSG00000271786	RP11-139J15.7	0.511066	0.732784	0.316908	0.894149	0.257847	1.75616	0.865819	0.732784	0.213569	0.894149	0.229322	1.75616	0.853603	0.732784	0.973201	0.894149	0.749269	1.75616
ENSG00000049192	ADAMTS6	0.041174	0.0322469	0.154477	0.0691378	0.352333	0.131551	0.0241366	0.0322469	0.244935	0.0691378	0.580342	0.131551	0.0323626	0.0322469	0.143789	0.0691378	0.16334	0.131551
ENSG00000101323	HAO1	0.0233531	0	0	0	0	0	0	0	0	0	0	0	0	0	0	0	0	0
ENSG00000237136	C4orf51	0	0	0	0	0	0.0444016	0	0	0	0	0	0.0444016	0.0446027	0	0	0	0	0.0444016
ENSG00000129562	DAD1	188.669	183.445	353.054	207.405	336.385	188.441	185.307	183.445	323.463	207.405	323.055	188.441	177.056	183.445	197.186	207.405	236.686	188.441
ENSG00000177047	IFNW1	0	0	0.0364213	0.0252398	0	0	0	0	0	0.0252398	0	0	0	0	0	0.0252398	0	0
ENSG00000129566	TEP1	6.10316	6.07244	3.33279	9.44364	3.61644	10.028	6.07484	6.07244	3.6588	9.44364	3.72484	10.028	5.88618	6.07244	8.95387	9.44364	9.0015	10.028
ENSG00000177045	SIX5	1.8672	1.88842	1.97452	2.30504	2.14415	2.79415	3.45987	1.88842	1.62884	2.30504	1.92703	2.79415	2.96274	1.88842	1.75821	2.30504	2.40671	2.79415
ENSG00000272786	AL662890.8	0	0	0	0	0	0	0	0	0	0	0	0	0	0	0	0	0	0
ENSG00000154252	GAL3ST2	0.0454363	0.031023	0.120749	0.0278928	0.0891485	0.050365	0.0301866	0.031023	0.0759494	0.0278928	0.0679596	0.050365	0.0168644	0.031023	0.0339304	0.0278928	0.0444092	0.050365
ENSG00000272781	MDGA2	0.00674115	0.00690407	0	0.00620746	0	0.0298896	0	0.00690407	0.00563411	0.00620746	0.00604969	0.0298896	0	0.00690407	0	0.00620746	0	0.0298896
ENSG00000141232	TOB1	10.7491	10.4104	15.9381	12.619	18.0428	14.7251	10.5563	10.4104	18.1122	12.619	20.0539	14.7251	10.5394	10.4104	13.525	12.619	19.6769	14.7251
ENSG00000172673	THEMIS	0.00963066	0	0	0	0	0	0.0095975	0	0	0	0	0	0	0	0.0107878	0	0	0
ENSG00000172671	ZFAND4	0.824832	0.796297	0.664793	0.507391	1.02332	0.554579	0.673764	0.796297	0.841944	0.507391	1.24686	0.554579	0.869512	0.796297	0.643727	0.507391	0.5716	0.554579
ENSG00000236428	PPP1R18	0	0	0	0	0	0	0	0	0	0	0	0	0	0	0	0	0	0
ENSG00000223766	PRR3	0	0	0	0	0	0	0	0	0	0	0	0	0	0	0	0	0	0
ENSG00000223767	RNF5	0	0	0	0	0	0	0	0	0	0	0	0	0	0	0	0	0	0
ENSG00000236424	TSPY10	0	0	0	0	0	0.0355487	0	0	0	0	0	0.0355487	0	0	0	0	0.0104483	0.0355487
ENSG00000136750	GAD2	0.00675432	0	0	0.0124392	0	0	0	0	0	0.0124392	0	0	0	0	0.00756586	0.0124392	0	0
ENSG00000136754	ABI1	15.6403	13.9264	20.0989	15.1193	20.0013	19.802	14.8884	13.9264	24.2155	15.1193	23.4432	19.802	17.7645	13.9264	19.5113	15.1193	22.5352	19.802
ENSG00000136758	YME1L1	20.8323	19.8741	16.5591	18.3415	16.9536	19.4249	21.2189	19.8741	19.0777	18.3415	20.9642	19.4249	24.6075	19.8741	21.8697	18.3415	20.5528	19.4249
ENSG00000270784	CRIP1	0	0	0	0	0	0	0	0	0	0	0	0	0	0	0	0	0	0
ENSG00000270787	KIR2DL3	0	0	0	0	0	0	0	0	0	0	0	0	0	0	0	0	0	0
ENSG00000249087	C1orf213	0.140673	0.208105	0.249229	0.496555	0.262864	0.89228	0.171342	0.208105	0.0391905	0.496555	0.182352	0.89228	0.217554	0.208105	0.52525	0.496555	0.81732	0.89228
ENSG00000116014	KISS1R	0.0123508	0	0	0	0	0	0	0	0	0	0	0	0	0	0	0	0.0241431	0
ENSG00000116017	ARID3A	11.4558	12.1914	8.64409	15.9977	7.4078	15.0677	11.1187	12.1914	7.73725	15.9977	6.87863	15.0677	11.0472	12.1914	10.5681	15.9977	12.1887	15.0677
ENSG00000116016	EPAS1	1.4959	1.41264	1.33018	0.790869	2.4464	0.936268	1.21584	1.41264	1.01731	0.790869	2.67727	0.936268	1.37434	1.41264	0.66261	0.790869	0.983991	0.936268
ENSG00000187244	BCAM	1.52885	1.68037	0.444101	1.27428	0.529561	1.54313	1.71765	1.68037	0.387836	1.27428	0.342078	1.54313	1.49476	1.68037	1.1649	1.27428	1.49834	1.54313
ENSG00000271254	NBPF10	0	0	0	0	0	0	0	0	0	0	0	0	0	0	0	0	0	0
ENSG00000174099	MSRB3	1.52278	1.55959	0.942678	2.21057	0.967137	1.70385	1.96744	1.55959	1.03913	2.21057	1.26691	1.70385	1.65571	1.55959	1.64555	2.21057	1.07862	1.70385
ENSG00000224234	OR10C1	0	0	0	0	0	0	0	0	0	0	0	0	0	0	0	0	0	0
ENSG00000137409	MTCH1	84.3379	86.6277	108.649	89.3656	112.533	76.9537	86.9314	86.6277	95.2301	89.3656	103.749	76.9537	81.6703	86.6277	69.9426	89.3656	67.0104	76.9537
ENSG00000174093	RP11-1407O15.2	2.25443	2.03882	1.63534	1.89577	1.63579	2.67501	2.04885	2.03882	1.68749	1.89577	1.92902	2.67501	2.22927	2.03882	2.16954	1.89577	2.32542	2.67501
ENSG00000137404	NRM	1.81993	1.87445	1.45734	3.93872	1.82431	2.48464	2.03909	1.87445	1.26325	3.93872	1.7163	2.48464	1.44258	1.87445	2.2344	3.93872	1.77879	2.48464
ENSG00000137403	HLA-F	0	0	0	0	0	0	0	0	0	0	0	0	0	0	0	0	0	0
ENSG00000235194	PPP1R3E	1.01727	1.06483	0.632787	0.733543	0.553494	0.97008	0.868408	1.06483	0.553262	0.733543	0.728324	0.97008	0.924501	1.06483	0.628397	0.733543	0.815157	0.97008
ENSG00000264654	CA14	0	0	0	0	0	0	0	0	0	0	0	0	0	0	0	0	0	0
ENSG00000060138	YBX3	22.5147	21.2976	8.45531	20.9917	6.98108	19.7963	25.5886	21.2976	9.46904	20.9917	6.73509	19.7963	23.713	21.2976	23.5364	20.9917	19.8424	19.7963
ENSG00000044012	GUCA2B	0	0	0	0	0	0	0	0	0.0580964	0	0	0	0.116101	0	0	0	0.0339702	0
ENSG00000130758	MAP3K10	2.76293	2.89021	6.77902	4.46071	7.43225	4.93649	2.99796	2.89021	5.27166	4.46071	6.15396	4.93649	2.33268	2.89021	3.98062	4.46071	4.295	4.93649
ENSG00000231852	CYP21A2	0.149788	0.0292207	0.0568669	0.0459766	0.0419847	0.126504	0.0426493	0.0292207	0.0596143	0.0459766	0.0832149	0.126504	0.0714808	0.0292207	0.0479388	0.0459766	0.0906301	0.126504
ENSG00000231850	GAGE2B	0	0.12525	0	0	0	0.13556	0.0406244	0.12525	0	0	0	0.13556	0	0.12525	0	0	0.398433	0.13556
ENSG00000130751	NPAS1	0.233048	0.222219	0.946795	0.221997	0.479776	0.427576	0.176186	0.222219	0.886567	0.221997	0.483192	0.427576	0.19686	0.222219	0.405075	0.221997	0.329887	0.427576
ENSG00000130755	GMFG	62.206	65.0215	65.023	79.0806	59.884	79.2806	64.5869	65.0215	62.5934	79.0806	58.6122	79.2806	57.6054	65.0215	61.3036	79.0806	67.3058	79.2806
ENSG00000009694	TENM1	0.0337884	0.00329571	0.0028506	0.0162975	0.0135295	0.032103	0.0192411	0.00329571	0.00806845	0.0162975	0.00433179	0.032103	0.00895789	0.00329571	0.00720916	0.0162975	0.0518957	0.032103
ENSG00000110756	HPS5	8.59682	7.74287	8.02454	6.66425	7.95938	6.50802	8.11664	7.74287	8.65875	6.66425	10.135	6.50802	8.80656	7.74287	11.3806	6.66425	7.33876	6.50802
ENSG00000134278	SPIRE1	3.05585	3.19477	4.67958	2.47461	4.80798	3.88381	2.8079	3.19477	5.11599	2.47461	5.61308	3.88381	3.20105	3.19477	3.40166	2.47461	5.34638	3.88381
ENSG00000064726	BTBD1	21.033	20.3026	17.5782	16.2193	16.7613	16.9314	18.9121	20.3026	21.385	16.2193	21.8324	16.9314	22.9989	20.3026	19.4346	16.2193	18.7965	16.9314
ENSG00000072506	HSD17B10	35.0784	36.841	36.7778	54.6465	36.5383	34.6548	38.7222	36.841	32.4906	54.6465	31.4468	34.6548	30.0458	36.841	44.0249	54.6465	24.3908	34.6548
ENSG00000072501	SMC1A	12.1766	11.6168	7.6939	15.7234	6.04472	10.4075	12.4911	11.6168	8.34271	15.7234	7.04609	10.4075	12.2339	11.6168	13.2717	15.7234	9.04953	10.4075
ENSG00000134183	GNAT2	1.11572	0.841142	0.974627	0.613579	0.846972	0.772966	0.972891	0.841142	0.984299	0.613579	1.01518	0.772966	0.93176	0.841142	1.05884	0.613579	0.742144	0.772966
ENSG00000069712	KIAA1107	1.35546	1.34225	0.572531	1.94661	0.97749	2.54727	1.00638	1.34225	0.592689	1.94661	1.13184	2.54727	1.26441	1.34225	3.37348	1.94661	3.84723	2.54727
ENSG00000134186	PRPF38B	20.5031	19.8442	12.4781	16.226	13.1315	16.6263	18.744	19.8442	15.2519	16.226	15.7271	16.6263	23.3226	19.8442	19.3386	16.226	17.9339	16.6263
ENSG00000134184	GSTM1	7.41753	8.29895	3.161	9.32509	8.39737	9.26593	8.28923	8.29895	2.75453	9.32509	7.67224	9.26593	8.34216	8.29895	6.39349	9.32509	7.12876	9.26593
ENSG00000262716	TSEN34	0	0	0	0	0	0	0	0	0	0	0	0	0	0	0	0	0	0
ENSG00000262717	NCR1	0	0	0	0	0	0	0	0	0	0	0	0	0	0	0	0	0	0
ENSG00000037042	TUBG2	2.58243	2.33819	2.16828	4.46647	2.49252	2.76299	2.84208	2.33819	1.97691	4.46647	2.46533	2.76299	2.34209	2.33819	3.41256	4.46647	3.33614	2.76299
ENSG00000260623	VPRBP	0	0	0	0	0	0	0	0	0	0	0	0	0	0	0	0	0	0
ENSG00000078487	ZCWPW1	1.27572	1.17206	1.56773	1.30141	1.59332	1.53195	1.49568	1.17206	1.4739	1.30141	1.58261	1.53195	1.27428	1.17206	1.22586	1.30141	1.27745	1.53195
ENSG00000042753	AP2S1	57.5719	64.9619	138.319	85.2731	121.652	65.3017	56.4392	64.9619	118.4	85.2731	111.059	65.3017	48.6896	64.9619	77.4744	85.2731	65.4823	65.3017
ENSG00000105855	ITGB8	0.198512	0.179473	2.78693	0.202966	2.3473	0.110781	0.399749	0.179473	4.16153	0.202966	3.32587	0.110781	0.332325	0.179473	0.499934	0.202966	0.413472	0.110781
ENSG00000105854	PON2	0.335387	0.337768	0.113889	0.288245	0.244417	0.322199	0.233962	0.337768	0.280309	0.288245	0.306001	0.322199	0.304985	0.337768	0.237933	0.288245	0.267708	0.322199
ENSG00000111481	COPZ1	37.5306	36.8415	36.3184	32.9038	37.2076	31.331	35.1592	36.8415	34.4746	32.9038	36.3779	31.331	34.8369	36.8415	37.0769	32.9038	33.7241	31.331
ENSG00000105856	HBP1	4.56739	4.43351	8.82711	6.54334	7.60432	8.86901	4.1577	4.43351	8.96989	6.54334	9.47906	8.86901	5.28584	4.43351	7.3522	6.54334	12.9869	8.86901
ENSG00000105851	PIK3CG	7.11703	7.19228	7.23447	10.5972	6.4671	8.93627	6.70198	7.19228	7.86083	10.5972	8.39983	8.93627	6.45203	7.19228	11.4801	10.5972	9.10045	8.93627
ENSG00000079689	SCGN	0.0143395	0.0146861	0	0	0.0361734	0	0	0.0146861	0	0	0	0	0	0.0146861	0	0	0	0
ENSG00000105852	PON3	0	0	0	0	0	0	0	0	0.00858504	0	0	0	0	0	0	0	0.00501986	0
ENSG00000142252	GEMIN7	7.93131	9.93181	6.49801	8.84988	6.9335	7.62664	8.02277	9.93181	5.45157	8.84988	5.62031	7.62664	7.9628	9.93181	8.87213	8.84988	5.96228	7.62664
ENSG00000012174	MBTPS2	3.91417	3.8945	1.87986	2.5855	2.06784	3.24376	3.14093	3.8945	2.28064	2.5855	2.65954	3.24376	3.96759	3.8945	4.03558	2.5855	3.6712	3.24376
ENSG00000135587	SMPD2	11.9097	12.493	9.61926	15.4826	10.0579	10.9633	14.0042	12.493	8.6795	15.4826	8.70025	10.9633	13.0434	12.493	13.8946	15.4826	10.4523	10.9633
ENSG00000071082	RPL31	99.4539	105.189	64.2005	73.9814	53.6354	83.0916	95.9692	105.189	60.9912	73.9814	54.956	83.0916	101.405	105.189	80.435	73.9814	76.9605	83.0916
ENSG00000139780	METTL21C	0	0.0195319	0.0337879	0.0351223	0	0	0.114032	0.0195319	0	0.0351223	0	0	0	0.0195319	0.0427249	0.0351223	0.0186399	0
ENSG00000180660	MAB21L1	0	0	0	0	0	0	0.0142262	0	0	0	0	0	0	0	0	0	0	0
ENSG00000135638	EMX1	0.00557626	0	0.16301	0.0102696	0.140669	0	0.0111141	0	0.130495	0.0102696	0.125107	0	0	0	0	0.0102696	0.0109004	0
ENSG00000180667	YOD1	1.81369	1.64896	0.800506	1.87227	0.800006	2.84987	1.66158	1.64896	1.20204	1.87227	1.17648	2.84987	2.10102	1.64896	2.63396	1.87227	3.47385	2.84987
ENSG00000188419	CHM	2.2468	1.86104	2.0137	1.61579	2.07297	2.16058	2.03812	1.86104	2.3874	1.61579	2.36316	2.16058	2.45903	1.86104	2.47373	1.61579	2.71216	2.16058
ENSG00000135632	SMYD5	8.23218	8.38084	3.55649	5.65283	3.52566	3.45681	8.72995	8.38084	3.86342	5.65283	3.83437	3.45681	8.64698	8.38084	5.35674	5.65283	3.34204	3.45681
ENSG00000135631	RAB11FIP5	6.43255	8.1786	5.10022	14.1109	7.24141	17.3702	4.02611	8.1786	4.30329	14.1109	6.16512	17.3702	4.2298	8.1786	9.81882	14.1109	14.4512	17.3702
ENSG00000135636	DYSF	1.41034	2.18944	0.186305	5.0079	0.174768	10.7759	1.11205	2.18944	0.1613	5.0079	0.1843	10.7759	0.922955	2.18944	1.98998	5.0079	5.89108	10.7759
ENSG00000135637	CCDC142	7.96582	9.14341	8.16	8.43545	8.07714	7.63223	8.14107	9.14341	7.1499	8.43545	7.48336	7.63223	7.79418	9.14341	7.94995	8.43545	7.06515	7.63223
ENSG00000147155	EBP	15.4607	16.6371	9.45355	23.8495	12.2112	19.2956	14.1285	16.6371	8.21377	23.8495	11.6564	19.2956	14.319	16.6371	16.9614	23.8495	14.4378	19.2956
ENSG00000114503	NCBP2	26.2226	26.391	16.4146	15.7665	16.1989	14.8821	25.5299	26.391	19.4239	15.7665	19.2108	14.8821	29.1671	26.391	19.9428	15.7665	16.152	14.8821
ENSG00000263440	TUBAL3	0	0	0	0	0	0	0	0	0	0	0	0	0	0	0	0	0	0
ENSG00000115677	HDLBP	42.3434	41.5106	37.576	38.2162	39.7348	39.6242	41.4405	41.5106	37.4396	38.2162	41.0938	39.6242	40.1374	41.5106	37.0938	38.2162	41.4677	39.6242
ENSG00000261972	CES5A	0	0	0	0	0	0	0	0	0	0	0	0	0	0	0	0	0	0
ENSG00000261975	RDH13	0	0	0	0	0	0	0	0	0	0	0	0	0	0	0	0	0	0
ENSG00000261974	CWC15	0	0	0	0	0	0	0	0	0	0	0	0	0	0	0	0	0	0
ENSG00000112531	QKI	20.1244	18.1086	15.356	15.3607	16.1798	22.1684	17.9431	18.1086	18.9773	15.3607	23.0103	22.1684	21.859	18.1086	21.6592	15.3607	29.4442	22.1684
ENSG00000263192	CCDC84	0	0	0	0	0	0	0	0	0	0	0	0	0	0	0	0	0	0
ENSG00000263194	THEM6	0	0	0	0	0	0	0	0	0	0	0	0	0	0	0	0	0	0
ENSG00000162591	MEGF6	0.347835	0.467945	0.744208	0.328441	0.639507	0.597955	0.370138	0.467945	0.581427	0.328441	0.439136	0.597955	0.34136	0.467945	0.18821	0.328441	0.299637	0.597955
ENSG00000105143	SLC1A6	0.00542748	0	0	0.0024989	0	0.00300811	0.0027044	0	0	0.0024989	0	0.00300811	0	0	0	0.0024989	0	0.00300811
ENSG00000105141	CASP14	0.0118601	0	0	0	0.0199458	0	0	0	0	0	0	0	0	0	0	0	0	0
ENSG00000105146	AURKC	0.11918	0.109854	0.21115	0.230464	0.160346	0.184951	0.0475079	0.109854	0.11953	0.230464	0.256693	0.184951	0.106165	0.109854	0.267	0.230464	0.244621	0.184951
ENSG00000267631	CGB1	0.0932551	0	0.0206524	0	0	0	0	0	0	0	0	0	0	0	0	0	0	0
ENSG00000142920	ADC	0.107558	0.0842383	0.100885	0.0524345	0.218129	0.112212	0.0851198	0.0842383	0.105759	0.0524345	0.150466	0.112212	0.0915854	0.0842383	0.0885894	0.0524345	0.0618394	0.112212
ENSG00000267635	RP11-206C20.1	0	0	0	0	0	0	0	0	0	0	0	0	0	0	0	0	0	0
ENSG00000235941	HSPA1A	0	0	0	0	0	0	0	0	0	0	0	0	0	0	0	0	0	0
ENSG00000235942	LCE6A	0	0	0	0	0	0	0	0	0	0	0	0	0	0	0	0	0	0
ENSG00000146205	ANO7	0.167597	0.246277	0.30984	0.228138	0.238967	0.129236	0.141604	0.246277	0.225337	0.228138	0.209261	0.129236	0.170391	0.246277	0.27752	0.228138	0.178053	0.129236
ENSG00000164418	GRIK2	0.166171	0.144659	0.22571	0.211672	0.195622	0.141217	0.353278	0.144659	0.182862	0.211672	0.191379	0.141217	0.271379	0.144659	0.425013	0.211672	0.227381	0.141217
ENSG00000164411	GJB7	0.285368	0.230735	0.306011	0.124473	0.423088	0.23308	0.179612	0.230735	0.213399	0.124473	0.417842	0.23308	0.275946	0.230735	0.2103	0.124473	0.198178	0.23308
ENSG00000164414	SLC35A1	8.48077	7.8438	4.19418	8.71964	6.58005	11.5346	6.22201	7.8438	4.74855	8.71964	7.87234	11.5346	8.95664	7.8438	8.91694	8.71964	9.62141	11.5346
ENSG00000100532	CGRRF1	1.24374	1.36183	0.779296	1.10803	0.943805	0.935917	1.26969	1.36183	0.769056	1.10803	1.1933	0.935917	1.26668	1.36183	1.44415	1.10803	1.23539	0.935917
ENSG00000077454	LRCH4	10.8914	12.4054	14.5009	16.3902	11.9351	16.5475	12.2302	12.4054	11.9402	16.3902	10.9305	16.5475	10.36	12.4054	12.7659	16.3902	13.832	16.5475
ENSG00000077458	FAM76B	3.05641	3.08104	1.01608	2.17249	0.898082	2.40202	2.79948	3.08104	1.19975	2.17249	1.28208	2.40202	3.4836	3.08104	2.6966	2.17249	2.09784	2.40202
ENSG00000212658	KRTAP29-1	0	0	0.0358297	0	0.0170055	0	0	0	0	0	0	0	0	0	0	0	0	0
ENSG00000212659	KRTAP9-6	0	0	0	0.0146635	0	0	0	0	0	0.0146635	0	0	0	0	0	0.0146635	0	0
ENSG00000169154	GOT1L1	0	0	0	0	0	0	0	0	0	0	0	0	0	0	0	0	0.0128437	0
ENSG00000152056	AP1S3	3.67617	3.78485	0.991113	5.75337	1.52321	3.25887	3.06499	3.78485	1.10511	5.75337	1.66476	3.25887	3.14959	3.78485	3.71638	5.75337	2.66994	3.25887
ENSG00000212657	KRTAP16-1	0.0400565	0	0	0.0245902	0	0	0	0	0	0.0245902	0	0	0	0	0	0.0245902	0	0
ENSG00000260362	RP11-297M9.1	0	0	0	0	0	0	0	0	0	0	0	0	0	0	0	0	0	0
ENSG00000021300	PLEKHB1	0.0126186	0	0.0260824	0.0193661	0.0282954	0.00466248	0	0	0.00703093	0.0193661	0.0377477	0.00466248	0.0327852	0	0.0188464	0.0193661	0.00411113	0.00466248
ENSG00000100399	CHADL	0.871213	1.09692	0.481465	1.1408	0.530956	0.726503	1.09921	1.09692	0.380771	1.1408	0.480587	0.726503	0.907792	1.09692	0.74311	1.1408	0.554659	0.726503
ENSG00000100393	EP300	16.5258	15.6437	19.2014	15.674	18.8238	15.6669	17.0061	15.6437	18.9122	15.674	20.688	15.6669	16.5936	15.6437	13.4531	15.674	14.8298	15.6669
ENSG00000100395	L3MBTL2	8.51392	9.4477	5.11729	8.73138	6.1206	5.80438	8.43972	9.4477	4.82538	8.73138	5.68933	5.80438	7.71453	9.4477	6.30868	8.73138	4.20631	5.80438
ENSG00000259164	RP11-463C8.4	1.82373	1.86781	2.22519	1.04563	1.62034	1.44942	1.54312	1.86781	1.78307	1.04563	1.60579	1.44942	1.41767	1.86781	1.61887	1.04563	0.874437	1.44942
ENSG00000264162	ITGA10	0	0	0	0	0	0	0	0	0	0	0	0	0	0	0	0	0	0
ENSG00000196550	FAM72A	10.0647	10.0552	2.98327	12.8842	3.00249	8.25642	9.40695	10.0552	3.20431	12.8842	3.293	8.25642	9.88783	10.0552	9.83636	12.8842	5.90233	8.25642
ENSG00000196557	CACNA1H	0.00489139	0	0	0	0.00205653	0.00542198	0	0	0.00613217	0	0.00219483	0.00542198	0.0163396	0	0.00547909	0	0.011952	0.00542198
ENSG00000197208	SLC22A4	3.18032	2.86189	7.93896	3.26262	7.0881	3.02902	3.17706	2.86189	7.29026	3.26262	8.27828	3.02902	2.81067	2.86189	3.04364	3.26262	2.12761	3.02902
ENSG00000239463	HLA-DMA	0	0	0	0	0	0	0	0	0	0	0	0	0	0	0	0	0	0
ENSG00000151292	CSNK1G3	4.44449	4.26715	2.50344	4.60468	2.8998	5.94321	4.36302	4.26715	3.2776	4.60468	3.82846	5.94321	5.42948	4.26715	6.71238	4.60468	7.03318	5.94321
ENSG00000113141	IK	15.4404	17.1158	16.0965	19.531	16.2038	21.4334	15.4579	17.1158	17.4434	19.531	17.0116	21.4334	17.2887	17.1158	19.9115	19.531	21.5972	21.4334
ENSG00000026652	AGPAT4	3.36165	2.66903	6.10802	2.66952	6.02026	3.26723	3.48179	2.66903	6.72388	2.66952	6.86003	3.26723	3.73091	2.66903	4.18752	2.66952	4.3536	3.26723
ENSG00000185158	LRRC37B	0.782929	0.632684	0.465296	0.964302	0.536124	1.04362	0.585997	0.632684	0.480413	0.964302	0.652222	1.04362	0.846038	0.632684	0.832594	0.964302	1.05905	1.04362
ENSG00000185155	MIXL1	0.0613581	0	0.0181179	0	0	0	0	0	0.0170939	0	0	0	0	0	0	0	0	0
ENSG00000185156	MFSD6L	0.0371851	0.0190419	0	0	0.0312682	0.0206093	0.0185285	0.0190419	0.0466177	0	0.0417136	0.0206093	0	0.0190419	0	0	0.0545167	0.0206093
ENSG00000106635	BCL7B	25.4006	25.3725	32.0286	21.8415	28.9989	17.9546	24.9453	25.3725	27.8683	21.8415	28.0786	17.9546	21.7735	25.3725	23.6229	21.8415	17.3487	17.9546
ENSG00000106636	YKT6	41.6888	39.704	49.1572	32.6981	50.6391	25.184	41.1269	39.704	45.0035	32.6981	47.8157	25.184	37.0901	39.704	31.1674	32.6981	27.901	25.184
ENSG00000106631	MYL7	0	0	0	0	0.0119668	0	0	0	0	0	0.0127716	0	0	0	0	0	0	0
ENSG00000106633	GCK	0	0	0	0	0	0	0.00501888	0	0.143112	0	0.12655	0	0	0	0	0	0.00984477	0
ENSG00000261109	PLEC	0	0	0	0	0	0	0	0	0	0	0	0	0	0	0	0	0	0
ENSG00000106638	TBL2	26.1546	26.0109	18.7289	19.51	15.416	14.3529	21.9714	26.0109	16.9277	19.51	15.1261	14.3529	20.1221	26.0109	27.1	19.51	16.6861	14.3529
ENSG00000123584	MAGEA9B	0	0	0	0	0	0	0	0	0	0	0	0	0	0	0	0	0	0
ENSG00000152670	DDX4	0	0.00554994	0	0	0	0.0060068	0	0.00554994	0	0	0.00486313	0.0060068	0	0.00554994	0	0	0.00529648	0.0060068
ENSG00000152672	CLEC4F	0	0	0	0	0	0.0371718	0	0	0	0	0	0.0371718	0	0	0	0	0	0.0371718
ENSG00000143643	TTC13	6.54203	5.92316	2.59214	6.89505	4.3909	7.63391	5.30691	5.92316	3.22379	6.89505	5.18574	7.63391	6.26424	5.92316	7.24529	6.89505	6.59637	7.63391
ENSG00000124588	NQO2	5.1979	6.06916	4.972	4.16275	5.35317	3.39698	6.56358	6.06916	4.83957	4.16275	5.71316	3.39698	5.58045	6.06916	4.65605	4.16275	3.81444	3.39698
ENSG00000143641	GALNT2	18.9496	19.6109	38.5568	22.6758	48.2775	19.85	17.2445	19.6109	34.8582	22.6758	44.5693	19.85	14.8647	19.6109	20.0415	22.6758	21.3473	19.85
ENSG00000124587	PEX6	8.18941	8.10188	5.28463	13.2037	8.38723	15.9534	8.59852	8.10188	4.93143	13.2037	7.38664	15.9534	7.91049	8.10188	11.2924	13.2037	12.4266	15.9534
ENSG00000167332	OR51E2	0.043348	0	0	0.0133054	0	0	0	0	0	0.0133054	0	0	0	0	0	0.0133054	0	0
ENSG00000167333	TRIM68	1.9189	1.85609	1.01304	1.94992	1.57281	1.43414	1.82054	1.85609	0.980082	1.94992	1.69597	1.43414	2.03416	1.85609	1.91605	1.94992	1.38769	1.43414
ENSG00000009830	POMT2	1.59785	1.72561	1.73856	1.84921	1.80889	1.31173	1.81747	1.72561	1.72171	1.84921	1.61436	1.31173	1.69612	1.72561	1.58323	1.84921	1.07356	1.31173
ENSG00000178927	C17orf62	17.7289	18.8536	13.7385	21.3727	17.3656	16.1801	17.6936	18.8536	13.0986	21.3727	15.0146	16.1801	17.3489	18.8536	18.1659	21.3727	14.3145	16.1801
ENSG00000178921	PFAS	4.18448	4.40384	1.2356	4.44078	0.922128	2.09705	4.24357	4.40384	1.09877	4.44078	0.834503	2.09705	3.84534	4.40384	3.61332	4.44078	1.27868	2.09705
ENSG00000178922	HYI	11.9128	11.8561	11.6387	13.1902	14.7463	13.7379	12.8618	11.8561	10.2243	13.1902	12.7686	13.7379	12.6226	11.8561	11.4776	13.1902	12.3952	13.7379
ENSG00000178928	TPRX1	0.00999965	0	0.00885814	0	0	0	0.0199304	0	0	0	0	0	0	0	0	0	0.0097736	0
ENSG00000168310	IRF2	15.5619	11.7847	19.7963	15.4704	20.936	18.6451	20.2133	11.7847	21.1541	15.4704	21.6328	18.6451	17.5506	11.7847	18.6774	15.4704	23.554	18.6451
ENSG00000262459	WBSCR28	0	0	0	0	0	0	0	0	0	0	0	0	0	0	0	0	0	0
ENSG00000168314	MOBP	0.0224632	0.0184049	0	0.00827392	0	0.0224099	0.0313402	0.0184049	0	0.00827392	0.00201591	0.0224099	0.0200101	0.0184049	0.0150973	0.00827392	0.0131733	0.0224099
ENSG00000262457	NLRP7	0	0	0	0	0	0	0	0	0	0	0	0	0	0	0	0	0	0
ENSG00000262452	SPC25	0	0	0	0	0	0	0	0	0	0	0	0	0	0	0	0	0	0
ENSG00000268417	LRCH2	0	0	0	0	0	0	0	0	0	0	0	0	0	0	0	0	0	0
ENSG00000114268	PFKFB4	5.41578	5.78153	29.0063	8.55805	19.3674	5.51358	4.44272	5.78153	27.6826	8.55805	17.7766	5.51358	4.367	5.78153	13.5609	8.55805	9.16615	5.51358
ENSG00000268413	AC003043.1	0	0	0	0	0	0	0	0	0	0	0	0	0	0	0	0	0	0
ENSG00000268412	AC013449.1	0.457704	0.364596	0.270303	0.796107	0.470402	0.620099	0.405447	0.364596	0.255026	0.796107	0.228198	0.620099	0.566279	0.364596	0.512698	0.796107	0.397651	0.620099
ENSG00000040487	PQLC2	12.2209	12.991	14.4527	12.4627	14.1803	8.08341	11.7785	12.991	11.6085	12.4627	12.1459	8.08341	10.9586	12.991	8.50603	12.4627	7.14262	8.08341
ENSG00000204709	C6orf100	0	0	0.0394434	0	0	0	0	0	0	0	0	0	0	0	0	0	0	0
ENSG00000204703	OR2B3	0	0	0	0	0	0	0	0	0	0	0.0336726	0	0	0	0	0	0	0
ENSG00000204702	OR2J1	0	0	0.0288777	0.0150091	0	0	0	0	0	0.0150091	0.0292552	0	0	0	0	0.0150091	0	0
ENSG00000204701	OR2J3	0.044336	0	0.0392749	0.102065	0	0	0.0441833	0	0	0.102065	0	0	0	0	0	0.102065	0	0
ENSG00000204700	OR2J2	0	0	0	0.018354	0	0	0.0198634	0	0	0.018354	0	0	0	0	0	0.018354	0	0
ENSG00000110680	CALCA	0	0	0	0	0	0.0108083	0	0	0	0	0.00875044	0.0108083	0	0	0	0	0.0190604	0.0108083
ENSG00000204704	OR2W1	0	0	0	0	0	0	0	0	0	0	0	0	0	0	0	0	0	0
ENSG00000153107	ANAPC1	7.82691	6.94588	3.21151	6.10882	2.8704	4.26547	6.79121	6.94588	3.15234	6.10882	3.42399	4.26547	7.49447	6.94588	7.03166	6.10882	3.98938	4.26547
ENSG00000198721	ECI2	1.06488	0.867851	3.09488	1.21007	3.3493	1.54204	0.718011	0.867851	3.06388	1.21007	3.8714	1.54204	0.978863	0.867851	1.2182	1.21007	1.76273	1.54204
ENSG00000167004	PDIA3	100.36	97.8386	50.8459	107.7	56.5608	81.1999	92.3479	97.8386	53.9272	107.7	57.6371	81.1999	99.2445	97.8386	111.492	107.7	91.9402	81.1999
ENSG00000158022	TRIM63	0.00806423	0.00825913	0.0142873	0	0.0203431	0.044695	0.0241094	0.00825913	0.0134798	0	0	0.044695	0	0.00825913	0.0270995	0	0.0157639	0.044695
ENSG00000158023	WDR66	0.233051	0.183298	0.279445	0.200373	0.214374	0.269749	0.198887	0.183298	0.253966	0.200373	0.254211	0.269749	0.210755	0.183298	0.263937	0.200373	0.441722	0.269749
ENSG00000198723	C19orf45	0	0	0	0.019684	0.047933	0.0552885	0.0497063	0	0.0297764	0.019684	0.0191837	0.0552885	0	0	0.0159631	0.019684	0.0696436	0.0552885
ENSG00000167800	TBX10	0.0134039	0.0137279	0	0.0123427	0	0.0148579	0.0133578	0.0137279	0	0.0123427	0	0.0148579	0.0298504	0.0137279	0	0.0123427	0.0131009	0.0148579
ENSG00000183248	CTD-3193O13.9	0.00918109	0.0282089	0	0	0.0540413	0.010177	0.00914947	0.0282089	0.0153467	0	0.0205984	0.010177	0	0.0282089	0	0	0.00897355	0.010177
ENSG00000127774	EMC6	17.9161	17.4096	28.1566	21.4421	23.5736	16.091	20.0056	17.4096	24.6934	21.4421	21.5509	16.091	17.1554	17.4096	20.643	21.4421	15.4805	16.091
ENSG00000239927	RPP21	0	0	0	0	0	0	0	0	0	0	0	0	0	0	0	0	0	0
ENSG00000233927	RPS28	131.095	150.059	128.396	140.986	115.925	128.568	149.029	150.059	113.798	140.986	99.5636	128.568	116.022	150.059	119.853	140.986	107.775	128.568
ENSG00000173838	2018-03-10	0	0.00863851	0.0037359	0.0155338	0	0	0	0.00863851	0	0.0155338	0	0	0.0234799	0.00863851	0.00472405	0.0155338	0.004122	0
ENSG00000122728	TAF1L	0.0300424	0.0136749	0.011828	0.0245902	0.00561378	0.0222008	0.0199593	0.0136749	0.00836959	0.0245902	0	0.0222008	0.00743378	0.0136749	0.0112173	0.0245902	0.00978775	0.0222008
ENSG00000122729	ACO1	2.42359	2.32421	2.17864	2.44475	3.01756	2.92156	2.28076	2.32421	2.36856	2.44475	3.24025	2.92156	2.25399	2.32421	1.97748	2.44475	2.65414	2.92156
ENSG00000245317	CTC-241N9.1	0.128434	0.116923	0.0758486	0.289095	0.215995	0.537827	0.142213	0.116923	0.166977	0.289095	0.15368	0.537827	0.158901	0.116923	0.223791	0.289095	0.348697	0.537827
ENSG00000165406	2018-03-08	3.39168	3.45673	4.55065	3.23724	6.19938	4.15325	2.55146	3.45673	4.55346	3.23724	6.46804	4.15325	3.02558	3.45673	3.62342	3.23724	4.5124	4.15325
ENSG00000165409	TSHR	0.0413557	0.0115514	0	0.0519294	0.00632275	0.0791811	0.0599465	0.0115514	0.0722705	0.0519294	0.158577	0.0791811	0.0711671	0.0115514	0.0421133	0.0519294	0.0661431	0.0791811
ENSG00000241258	CRCP	15.7842	15.5427	14.8216	12.2189	13.4545	10.8971	15.8114	15.5427	15.0201	12.2189	13.6246	10.8971	15.1011	15.5427	11.9815	12.2189	9.43705	10.8971
ENSG00000120075	HOXB5	0	0.0208238	0	0.0187227	0.0341943	0	0.0202624	0.0208238	0	0.0187227	0.0182469	0	0	0.0208238	0	0.0187227	0.0198728	0
ENSG00000240849	TMEM189	41.9112	43.8296	63.4204	46.9104	57.5169	48.8097	44.1346	43.8296	65.4107	46.9104	55.9849	48.8097	43.2547	43.8296	48.8668	46.9104	50.869	48.8097
ENSG00000158683	PKD1L1	0.0587367	0.0779803	0.0327606	0.0540865	0.0420733	0.15433	0.0997252	0.0779803	0.0327272	0.0540865	0.0449027	0.15433	0.0775146	0.0779803	0.0999093	0.0540865	0.270034	0.15433
ENSG00000008056	SYN1	0.330382	0.291924	0.636981	0.304226	0.735382	0.308773	0.206584	0.291924	0.573909	0.304226	0.488342	0.308773	0.317385	0.291924	0.108846	0.304226	0.278592	0.308773
ENSG00000130518	KIAA1683	0.455654	0.438806	0.417696	0.703475	0.772019	1.08303	0.508304	0.438806	0.367563	0.703475	0.754765	1.08303	0.530086	0.438806	0.784647	0.703475	1.04581	1.08303
ENSG00000159374	M1AP	1.71527	1.72839	0.0980301	1.06997	0.145397	1.978	1.74383	1.72839	0.144515	1.06997	0.0806907	1.978	1.47867	1.72839	1.13113	1.06997	2.2173	1.978
ENSG00000159377	PSMB4	123.957	123.743	124.678	131.391	116.458	102.733	135.153	123.743	106.952	131.391	108.404	102.733	117.833	123.743	120.218	131.391	93.0935	102.733
ENSG00000130511	SSBP4	47.9661	52.9482	39.116	58.7395	31.7214	47.7633	47.4811	52.9482	33.2433	58.7395	27.7373	47.7633	40.6227	52.9482	49.767	58.7395	40.5673	47.7633
ENSG00000130513	GDF15	60.6571	61.2168	170.067	61.2197	68.9545	116.036	58.635	61.2168	145.207	61.2197	59.6994	116.036	51.024	61.2168	93.2143	61.2197	232.149	116.036
ENSG00000130517	PGPEP1	14.381	13.3863	31.0002	22.5061	31.2039	28.7684	12.9814	13.3863	30.0645	22.5061	29.4716	28.7684	10.9683	13.3863	19.6416	22.5061	26.5719	28.7684
ENSG00000164758	MED30	11.3833	11.6584	3.30596	11.7824	3.2472	12.2347	11.1	11.6584	3.60083	11.7824	3.60781	12.2347	11.3756	11.6584	10.9917	11.7824	9.40777	12.2347
ENSG00000164756	SLC30A8	0	0	0	0	0.00833618	0.00732602	0.00329317	0	0	0	0	0.00732602	0	0	0	0	0.00322985	0.00732602
ENSG00000164754	RAD21	39.2601	37.1648	23.9584	43.4649	24.044	48.3885	35.5784	37.1648	27.1638	43.4649	30.0365	48.3885	42.9696	37.1648	46.6986	43.4649	49.2824	48.3885
ENSG00000164751	PEX2	4.18138	4.43113	2.49142	3.9	3.13932	3.74291	4.46875	4.43113	3.15148	3.9	3.73387	3.74291	5.27027	4.43113	4.45145	3.9	3.88414	3.74291
ENSG00000058085	LAMC2	0.0697668	0.0617093	0.797815	0.0292015	1.18397	0.049213	0.0379235	0.0617093	0.776577	0.0292015	1.20668	0.049213	0.0670915	0.0617093	0.0213135	0.0292015	0.0712892	0.049213
ENSG00000159082	SYNJ1	2.67144	2.4358	2.20021	2.14031	1.93286	2.1062	2.28558	2.4358	2.34662	2.14031	2.47125	2.1062	2.4822	2.4358	2.60072	2.14031	2.41	2.1062
ENSG00000155506	LARP1	49.5519	50.9122	28.874	39.5496	32.3024	37.6879	51.4632	50.9122	29.2393	39.5496	32.1393	37.6879	49.1386	50.9122	33.3554	39.5496	30.4609	37.6879
ENSG00000159086	PAXBP1	6.86464	6.23202	1.9293	4.42958	2.12168	5.06434	6.37652	6.23202	2.32282	4.42958	2.98988	5.06434	8.03457	6.23202	6.18764	4.42958	5.75337	5.06434
ENSG00000011478	QPCTL	4.5638	5.23286	3.82035	4.74474	3.82304	5.60602	4.26329	5.23286	3.6189	4.74474	2.89884	5.60602	4.12712	5.23286	3.96749	4.74474	5.01927	5.60602
ENSG00000010704	HFE	0.0731252	0.029957	0.136033	0.0942702	0.252107	0.0770045	0.0582987	0.029957	0.155847	0.0942702	0.226404	0.0770045	0.0977093	0.029957	0.0491468	0.0942702	0.0786194	0.0770045
ENSG00000196616	ADH1B	0.0096017	0	0.00283521	0.00589436	0	0	0.00637909	0	0	0.00589436	0	0	0	0	0	0.00589436	0	0
ENSG00000125046	SSUH2	0.0165227	0	0	0.00608586	0	0.00366301	0.00329317	0	0	0.00608586	0	0.00366301	0	0	0	0.00608586	0	0.00366301
ENSG00000196611	MMP1	78.5102	89.0697	919.853	178.321	854.261	534.581	70.8713	89.0697	1065.75	178.321	1021.55	534.581	62.9442	89.0697	191.035	178.321	750.389	534.581
ENSG00000196610	HLA-DQB2	0	0	0	0	0	0	0	0	0	0	0	0	0	0	0	0	0	0
ENSG00000081913	PHLPP1	6.48797	6.58673	3.36165	6.38764	3.24629	8.19689	6.82031	6.58673	3.0125	6.38764	3.61107	8.19689	6.73462	6.58673	4.33461	6.38764	5.73864	8.19689
ENSG00000120498	TEX11	0.116949	0.195424	0.0654309	0.323071	0.0362306	0.457135	0.0613403	0.195424	0.0308664	0.323071	0.0276193	0.457135	0.0959533	0.195424	0.117211	0.323071	0.156418	0.457135
ENSG00000005471	ABCB4	2.79647	3.22136	2.2099	2.4221	2.23508	4.21391	2.5054	3.22136	2.24467	2.4221	2.17915	4.21391	2.72539	3.22136	2.83473	2.4221	4.21896	4.21391
ENSG00000256713	PGA5	0.961603	1.32042	0.189296	1.27246	0.353385	1.90285	0.610467	1.32042	0.303615	1.27246	0.389934	1.90285	0.658307	1.32042	0.829798	1.27246	0.863284	1.90285
ENSG00000256715	AL050302.1	0	0	0	0	0	0	0	0	0	0	0	0	0	0	0	0	0	0
ENSG00000037280	FLT4	0.0211033	0.00240148	0.04362	0.036706	0.047321	0.0337892	0.0186939	0.00240148	0.115625	0.036706	0.21043	0.0337892	0.0365531	0.00240148	0.0131327	0.036706	0.0183345	0.0337892
ENSG00000243003	LY6G6F	0	0	0	0	0	0	0	0	0	0	0	0	0	0	0	0	0	0
ENSG00000160124	CCDC58	4.31385	4.40594	2.74762	2.80142	3.2477	2.08133	4.72534	4.40594	3.55576	2.80142	3.32745	2.08133	4.44617	4.40594	3.59417	2.80142	1.70744	2.08133
ENSG00000243009	RPP21	0	0	0	0	0	0	0	0	0	0	0	0	0	0	0	0	0	0
ENSG00000203910	C1orf146	0.176007	0.20029	0	0.108048	0.0493335	0.151744	0.0584669	0.20029	0.0490343	0.108048	0.0526511	0.151744	0.239534	0.20029	0.460027	0.108048	0.229371	0.151744
ENSG00000175294	CATSPER1	1.83014	2.38053	1.06029	2.40343	1.30516	3.18422	1.45445	2.38053	0.871285	2.40343	1.29591	3.18422	1.67671	2.38053	1.59158	2.40343	2.39257	3.18422
ENSG00000231389	HLA-DPA1	0.0505375	0.107215	0	0.0997211	0	0.0640223	0.0503635	0.107215	0	0.0997211	0.00971865	0.0640223	0.241171	0.107215	0.105132	0.0997211	0.0917338	0.0640223
ENSG00000176928	GCNT4	0.157008	0.123695	0.690076	0.0444856	0.558568	0.180734	0.12036	0.123695	0.479473	0.0444856	0.802066	0.180734	0.289139	0.123695	0.189402	0.0444856	0.20658	0.180734
ENSG00000176922	OR51S1	0	0	0	0.0351223	0	0	0	0	0	0.0351223	0	0	0	0	0	0.0351223	0	0
ENSG00000176920	FUT2	0.0613884	0.144606	0.0108761	0.146974	0.0619442	0.0952664	0.0611769	0.144606	0.0461764	0.146974	0.0495824	0.0952664	0.0478489	0.144606	0.0343821	0.146974	0.126001	0.0952664
ENSG00000176927	EFCAB5	0.0688847	0.05828	0.0795928	0.0799784	0.0705158	0.0796768	0.0388007	0.05828	0.125157	0.0799784	0.0860089	0.0796768	0.0466886	0.05828	0.0939355	0.0799784	0.0848912	0.0796768
ENSG00000176925	OR51F2	0.0365304	0	0	0.0336383	0	0	0.109214	0	0	0.0336383	0	0	0	0	0	0.0336383	0	0
ENSG00000198169	ZNF251	2.09555	2.25824	1.86006	1.96452	2.61838	3.27905	2.06736	2.25824	1.8956	1.96452	3.30804	3.27905	2.20687	2.25824	2.43217	1.96452	3.5658	3.27905
ENSG00000198168	SVIP	0.693876	0.904458	0.544818	0.573596	0.55363	0.467605	0.730776	0.904458	0.622762	0.573596	0.587322	0.467605	0.895545	0.904458	0.605016	0.573596	0.446989	0.467605
ENSG00000198162	MAN1A2	8.86249	8.4106	3.65635	4.79294	4.4147	5.79581	7.6491	8.4106	4.78079	4.79294	5.38383	5.79581	9.3975	8.4106	6.30406	4.79294	6.10274	5.79581
ENSG00000198161	PPIAL4C	0.158593	0.189497	0	0.0486791	0.0222263	0.0292994	0	0.189497	0.0220915	0.0486791	0	0.0292994	0.117728	0.189497	0.0592161	0.0486791	0.103339	0.0292994
ENSG00000198160	MIER1	5.70586	5.21957	4.3591	4.36728	4.57228	5.50744	5.2638	5.21957	5.1713	4.36728	6.05467	5.50744	7.1354	5.21957	6.26781	4.36728	5.97155	5.50744
ENSG00000171049	FPR2	0.0336475	0.0689213	0.0149032	0.077459	0.0188623	0.248649	0.055886	0.0689213	0.00937394	0.077459	0.0603922	0.248649	0.0124887	0.0689213	0.0690988	0.077459	0.208283	0.248649
ENSG00000171045	TSNARE1	1.21634	1.59119	1.10465	1.92948	1.19039	2.39631	1.53301	1.59119	0.909803	1.92948	1.09616	2.39631	1.55925	1.59119	1.33386	1.92948	2.11793	2.39631
ENSG00000171044	XKR6	0.816587	0.873038	0.815114	0.869313	0.854127	0.909581	0.666898	0.873038	0.695802	0.869313	0.897265	0.909581	0.731847	0.873038	0.892391	0.869313	0.766981	0.909581
ENSG00000175745	NR2F1	1.38296	1.97281	1.842	1.33714	1.15875	1.56582	1.00903	1.97281	1.77092	1.33714	1.37408	1.56582	1.16593	1.97281	1.17844	1.33714	1.94547	1.56582
ENSG00000179674	ARL14	0	0	0	0.0297147	0	0	0	0	0	0.0297147	0	0	0	0	0	0.0297147	0	0
ENSG00000179673	RPRML	0	0.0389208	0	0	0	0.0210623	0.0946786	0.0389208	0.0158808	0	0.0341043	0.0210623	0	0.0389208	0.0851367	0	0.0371433	0.0210623
ENSG00000147316	MCPH1	5.42686	5.43644	2.85061	4.42722	2.6667	4.60095	4.81665	5.43644	3.30607	4.42722	3.18085	4.60095	6.03334	5.43644	5.16232	4.42722	4.96439	4.60095
ENSG00000145220	LYAR	17.0808	16.4947	6.94327	12.7624	7.0272	11.1281	14.5431	16.4947	7.73239	12.7624	7.82095	11.1281	18.0131	16.4947	14.6329	12.7624	9.89087	11.1281
ENSG00000167476	JSRP1	146.54	169.495	211.542	186.208	197.493	165.541	162.493	169.495	174.908	186.208	169.351	165.541	133.673	169.495	153.376	186.208	154.399	165.541
ENSG00000248789	CTD-2203A3.1	0	0	0	0	0	0	0	0	0	0	0	0	0	0	0	0	0	0
ENSG00000167470	MIDN	15.09	14.6273	48.5748	15.9653	42.1965	14.455	17.4485	14.6273	44.9536	15.9653	37.9254	14.455	12.9784	14.6273	16.5721	15.9653	16.4588	14.455
ENSG00000253873	PCDHGA11	48.8367	54.3038	40.0489	47.3829	46.7132	59.2999	42.1331	54.3038	37.4197	47.3829	42.2898	59.2999	42.6218	54.3038	35.7256	47.3829	53.1944	59.2999
ENSG00000069998	CECR5	11.1481	11.3487	4.46483	10.3816	4.40432	9.64081	10.9003	11.3487	4.12816	10.3816	4.17613	9.64081	10.19	11.3487	9.20087	10.3816	6.31908	9.64081
ENSG00000084754	HADHA	42.5331	41.7202	38.0712	45.671	34.6228	49.7475	40.8818	41.7202	36.3693	45.671	35.9101	49.7475	41.9203	41.7202	43.9444	45.671	45.1517	49.7475
ENSG00000240065	PSMB9	14.1233	14.8036	7.61073	17.7382	12.0123	20.9336	15.091	14.8036	6.42978	17.7382	11.4138	20.9336	12.7329	14.8036	21.2676	17.7382	17.7452	20.9336
ENSG00000095637	SORBS1	0.0747963	0.0373199	0.0781504	0.0335544	0.0725708	0.0297625	0.053515	0.0373199	0.0833509	0.0335544	0.0877778	0.0297625	0.0448459	0.0373199	0.0386692	0.0335544	0.029992	0.0297625
ENSG00000034713	GABARAPL2	22.1718	22.2313	27.1832	22.1105	28.788	28.678	21.4548	22.2313	26.9272	22.1105	29.8524	28.678	22.8833	22.2313	22.4456	22.1105	30.4671	28.678
ENSG00000176219	OR11H6	0	0	0	0	0	0	0	0	0	0	0	0	0	0	0	0	0	0
ENSG00000091513	TF	0.125973	0.15631	0.0193142	0.104846	0.0346304	0.287333	0.185895	0.15631	0.0202473	0.104846	0.0173926	0.287333	0.186128	0.15631	0.113973	0.104846	0.267562	0.287333
ENSG00000230522	MBD3L2	0	0	0	0	0	0.203027	0	0	0	0	0	0.203027	0	0	0	0	0	0.203027
ENSG00000146047	HIST1H2BA	0	0	0	0	0	0	0	0	0	0	0	0	0	0	0	0	0	0
ENSG00000146049	KAAG1	0	0.0307536	0.1463	0.0138253	0.0126249	0.0665703	0.0299245	0.0307536	0.0627416	0.0138253	0.0538956	0.0665703	0	0.0307536	0	0.0138253	0.102722	0.0665703
ENSG00000148225	WDR31	0.567839	0.723723	0.171399	1.03027	0.4598	1.29151	0.540733	0.723723	0.235536	1.03027	0.509594	1.29151	0.58545	0.723723	0.640778	1.03027	1.30323	1.29151
ENSG00000133136	GNG5P2	0.247999	0.0423321	0.0732296	0.0761217	0	0.0458168	0.0823817	0.0423321	0.103636	0.0761217	0.11128	0.0458168	0.0460243	0.0423321	0.0925989	0.0761217	0.201994	0.0458168
ENSG00000133135	RNF128	0	0.0123839	0.112469	0	0.177933	0	0.01205	0.0123839	0.0960064	0	0.27671	0	0.020196	0.0123839	0	0	0.0118183	0
ENSG00000133134	BEX2	0	0	0	0	0	0	0.0351663	0	0	0	0	0	0	0	0	0	0	0
ENSG00000272427	AC241929.1	0	0	0	0	0	0	0	0	0	0	0	0	0	0	0	0	0	0
ENSG00000133131	MORC4	1.08132	1.14174	1.06761	1.16834	1.16824	1.18748	1.11429	1.14174	1.16675	1.16834	1.40904	1.18748	1.37179	1.14174	1.35374	1.16834	1.26301	1.18748
ENSG00000148229	POLE3	51.2198	50.1237	24.7334	43.6134	24.751	27.8314	51.623	50.1237	23.7617	43.6134	24.3774	27.8314	48.0805	50.1237	39.362	43.6134	22.9282	27.8314
ENSG00000138308	PLA2G12B	0.073579	0.0188393	0	0.0169384	0	0	0.0549942	0.0188393	0.0614957	0.0169384	0	0	0.0409649	0.0188393	0.0206049	0.0169384	0.0359578	0
ENSG00000004799	PDK4	0.0596903	0.112861	0.0244045	0.245227	0.482619	0.595486	0.0457575	0.112861	0.0230252	0.245227	0.469747	0.595486	0.0664648	0.112861	0.144011	0.245227	0.417362	0.595486
ENSG00000144579	CTDSP1	19.0944	22.3432	17.6691	23.5811	18.0197	21.6182	20.0041	22.3432	15.3974	23.5811	15.7098	21.6182	17.5957	22.3432	17.6075	23.5811	17.3199	21.6182
ENSG00000067840	PDZD4	0.388368	0.286189	0.436336	0.309647	0.469943	0.257248	0.429509	0.286189	0.52251	0.309647	0.33578	0.257248	0.49573	0.286189	0.334231	0.309647	0.314781	0.257248
ENSG00000067842	ATP2B3	0.264392	0.417455	0.292763	0.245996	0.31264	0.351076	0.222312	0.417455	0.308442	0.245996	0.299062	0.351076	0.214666	0.417455	0.240629	0.245996	0.349937	0.351076
ENSG00000172828	CES3	0.685335	0.938736	0.0558682	0.82466	0.141419	1.37954	0.905047	0.938736	0.0245983	0.82466	0.0528253	1.37954	0.903568	0.938736	0.508647	0.82466	0.854769	1.37954
ENSG00000141068	KSR1	0.819997	0.933328	0.356196	0.819753	0.472475	1.36439	0.64219	0.933328	0.334597	0.819753	0.442793	1.36439	0.723411	0.933328	0.692333	0.819753	1.07434	1.36439
ENSG00000137309	HMGA1	519.597	570.811	1257.87	533.711	878.125	417.223	534.477	570.811	1048.58	533.711	756.593	417.223	492.893	570.811	729.022	533.711	612.921	417.223
ENSG00000144681	STAC	0.146321	0.0821798	0.393035	0.0999661	0.468339	0.23021	0.127002	0.0821798	0.319537	0.0999661	0.449003	0.23021	0.0946031	0.0821798	0.121604	0.0999661	0.355227	0.23021
ENSG00000172824	CES4A	0.40638	0.352547	0.592924	0.484268	0.474383	0.57765	0.304926	0.352547	0.431547	0.484268	0.613547	0.57765	0.319413	0.352547	0.407008	0.484268	0.869152	0.57765
ENSG00000066468	FGFR2	0.0110032	0.00281728	0.00974712	0.0126651	0.00925236	0.00609838	0.0219306	0.00281728	0.0505793	0.0126651	0.081465	0.00609838	0	0.00281728	0.00616262	0.0126651	0	0.00609838
ENSG00000268996	AL807752.1	2.96418	2.42866	3.50107	2.12295	3.21258	1.60635	2.36318	2.42866	2.86277	2.12295	2.89659	1.60635	2.42044	2.42866	2.73005	2.12295	0.901343	1.60635
ENSG00000268991	FAM231C	0	0	0	0	0	0	0	0	0	0	0.0730233	0	0	0	0	0	0.159061	0
ENSG00000173193	PARP14	8.3175	7.37651	2.70412	4.96643	3.6325	13.0023	11.5693	7.37651	2.97925	4.96643	4.82601	13.0023	13.0502	7.37651	17.2452	4.96643	14.0561	13.0023
ENSG00000067596	DHX8	7.9611	8.21062	9.28319	10.3379	9.04268	8.31779	8.43829	8.21062	9.37374	10.3379	9.14632	8.31779	8.32317	8.21062	9.84213	10.3379	8.22153	8.31779
ENSG00000116604	MEF2D	92.1203	95.8375	60.9519	111.729	59.1066	99.8848	99.0435	95.8375	56.4882	111.729	53.5177	99.8848	89.4421	95.8375	81.7875	111.729	78.7221	99.8848
ENSG00000070808	CAMK2A	0.0371125	0.0552865	1.03111	0.10563	0.666698	0.112195	0.316051	0.0552865	1.17304	0.10563	0.717587	0.112195	0.172812	0.0552865	0.185183	0.10563	0.191261	0.112195
ENSG00000080189	SLC35C2	13.5633	14.2948	19.3386	19.7068	17.0482	20.4121	15.2289	14.2948	16.6449	19.7068	15.4691	20.4121	13.1558	14.2948	18.1478	19.7068	26.148	20.4121
ENSG00000147883	CDKN2B	0	0.0104735	0	0	0	0	0	0.0104735	0.0555553	0	0.0596531	0	0	0.0104735	0	0	0	0
ENSG00000147885	IFNA16	0	0	0	0	0	0	0.0440422	0	0	0	0	0	0	0	0	0	0	0
ENSG00000147889	CDKN2A	0	0	0	0.0043424	0.00396537	0	0	0	0.0906503	0.0043424	0.118497	0	0.00525095	0	0	0.0043424	0	0
ENSG00000101935	AMMECR1	2.32776	2.43294	1.48377	1.97634	1.40577	2.33671	2.23089	2.43294	1.94816	1.97634	1.69749	2.33671	2.63805	2.43294	2.60745	1.97634	2.40586	2.33671
ENSG00000101938	CHRDL1	0.019956	0.0102192	0	0.0183761	0.0167806	0.0331811	0	0.0102192	0.0083394	0.0183761	0.0179091	0.0331811	0.0111105	0.0102192	0.0167653	0.0183761	0.00975245	0.0331811
ENSG00000130656	HBZ	0	0	0	0	0	0	0	0	0	0	0	0	0	0	0	0	0	0
ENSG00000130653	PNPLA7	0.407075	0.532986	0.534762	0.641074	0.863532	1.15628	0.410283	0.532986	0.404017	0.641074	0.826121	1.15628	0.376013	0.532986	0.419714	0.641074	1.17553	1.15628
ENSG00000223590	C6orf205	0	0	0	0	0	0	0	0	0	0	0	0	0	0	0	0	0	0
ENSG00000113389	NPR3	0.212651	0.252292	0.0428975	0.45561	0.0513426	0.889194	0.144776	0.252292	0.0510311	0.45561	0.0510163	0.889194	0.157076	0.252292	0.141506	0.45561	0.730541	0.889194
ENSG00000269159	CU151838.2	0	0	0	0	0	0	0	0	0	0	0	0	0	0	0	0	0	0
ENSG00000067334	DNTTIP2	13.3024	12.7611	11.2864	8.37368	12.6375	5.25331	12.4861	12.7611	13.575	8.37368	13.3193	5.25331	18.3058	12.7611	12.2716	8.37368	7.49877	5.25331
ENSG00000113387	SUB1	9.12621	9.18039	6.07168	10.1332	6.91431	8.86059	8.11012	9.18039	7.63679	10.1332	7.35132	8.86059	9.97861	9.18039	9.88123	10.1332	8.7198	8.86059
ENSG00000113384	GOLPH3	44.4861	42.7762	28.4322	46.4457	32.2327	59.7423	38.408	42.7762	29.6772	46.4457	38.987	59.7423	41.5046	42.7762	53.6451	46.4457	67.2415	59.7423
ENSG00000099985	OSM	0.549649	0.311624	2.52147	0.605553	1.90653	1.00095	0.43038	0.311624	3.11726	0.605553	1.64717	1.00095	0.50274	0.311624	0.725635	0.605553	0.661937	1.00095
ENSG00000099984	GSTT2	0	0	0	0	0	0.0210238	0	0	0	0	0	0.0210238	0	0	0	0	0	0.0210238
ENSG00000076258	FMO4	0.85734	0.481244	0.153355	0.523779	0.443643	1.15137	0.755804	0.481244	0.227366	0.523779	0.369903	1.15137	0.899567	0.481244	0.53558	0.523779	0.934647	1.15137
ENSG00000234631	AL162407.1	3.05237	3.70571	0.926627	2.98441	1.30497	5.20827	3.44345	3.70571	1.1609	2.98441	1.63895	5.20827	4.87861	3.70571	4.09142	2.98441	4.6678	5.20827
ENSG00000180592	SKIDA1	0.958815	1.18095	0.111028	0.940613	0.223958	1.7679	0.780648	1.18095	0.0942773	0.940613	0.202463	1.7679	1.08508	1.18095	0.343967	0.940613	0.750325	1.7679
ENSG00000061656	SPAG4	0.305681	0.237173	0.114879	0.29001	0.17915	0.297768	0.249241	0.237173	0.139354	0.29001	0.14132	0.297768	0.144401	0.237173	0.238649	0.29001	0.253503	0.297768
ENSG00000180596	HIST1H2BC	0.547343	1.35047	11.0196	0.343643	4.51881	0.634293	0.892567	1.35047	9.16994	0.343643	6.65352	0.634293	1.27433	1.35047	0.724581	0.343643	0.389069	0.634293
ENSG00000073578	SDHA	8.36109	8.30206	10.8183	12.4809	11.5409	9.11167	8.64309	8.30206	9.69179	12.4809	11.0064	9.11167	7.65362	8.30206	9.61799	12.4809	8.14305	9.11167
ENSG00000169203	RP11-231C14.4	7.43068	7.26525	1.46613	5.30038	1.96645	8.2313	8.29545	7.26525	2.32176	5.30038	1.94096	8.2313	7.73582	7.26525	6.77035	5.30038	8.75151	8.2313
ENSG00000089009	RPL6	201.884	215.332	101.406	164.724	84.6094	157.964	194.851	215.332	102.51	164.724	85.1321	157.964	212.151	215.332	175.381	164.724	159.524	157.964
ENSG00000273469	PRPF31	0	0	0	0	0	0	0	0	0	0	0	0	0	0	0	0	0	0
ENSG00000169208	OR10G3	0.0660805	0	0	0	0	0	0.0439019	0	0	0	0	0	0	0	0	0	0	0
ENSG00000089006	SNX5	8.33756	8.15679	3.5136	7.91952	4.3387	8.74083	6.71099	8.15679	3.85764	7.91952	4.75313	8.74083	8.58724	8.15679	9.22744	7.91952	10.0399	8.74083
ENSG00000273460	VSTM1	0	0	0	0	0	0	0	0	0	0	0	0	0	0	0	0	0	0
ENSG00000273462	PRPF31	0	0	0	0	0	0	0	0	0	0	0	0	0	0	0	0	0	0
ENSG00000264194	AC000003.2	0	0	0	0.0264085	0	0.0635799	0	0	0	0.0264085	0	0.0635799	0	0	0.0321248	0.0264085	0.0560614	0.0635799
ENSG00000269113	TRABD2B	0	0	0	0	0	0	0.00293969	0	0	0	0	0	0	0	0	0	0	0
ENSG00000264199	FAM25C	0	0	0	0	0	0	0	0	0	0	0	0	0	0	0	0	0	0
ENSG00000269117	AL121901.1	0	0	0	0	0	0	0	0	0	0	0	0	0	0	0	0	0	0
ENSG00000269115	TTC36	0	0	0	0	0	0	0	0	0	0	0	0	0	0	0	0	0	0
ENSG00000269114	MAGEA6	0	0	0	0	0	0	0	0	0	0	0	0	0	0	0	0	0	0
ENSG00000117266	CDK18	0.429767	0.698078	0.240064	0.602436	0.313045	1.1318	0.431015	0.698078	0.205905	0.602436	0.260398	1.1318	0.484639	0.698078	0.527398	0.602436	1.04077	1.1318
ENSG00000117262	GPR89A	2.75939	3.28251	1.61863	2.79742	2.06111	2.63881	2.85722	3.28251	1.84996	2.79742	2.20638	2.63881	3.62256	3.28251	3.12837	2.79742	2.27594	2.63881
ENSG00000107831	FGF8	0.0157549	0.0968143	0	0	0.026496	0.0873198	0.0628027	0.0968143	0.0131676	0	0.0141389	0.0873198	0.0701722	0.0968143	0.0352959	0	0.0923928	0.0873198
ENSG00000107833	NPM3	21.1741	20.289	11.1314	21.6802	7.59574	12.7888	23.1957	20.289	9.64263	21.6802	7.4243	12.7888	18.573	20.289	22.541	21.6802	9.28782	12.7888
ENSG00000156509	FBXO43	0.483274	0.376595	0.0791065	0.81747	0.0706739	0.663798	0.303623	0.376595	0.0439033	0.81747	0.0801407	0.663798	0.386045	0.376595	0.429542	0.81747	0.333725	0.663798
ENSG00000156508	EEF1A1	3368.58	3205.63	1676.45	2425.99	1475.19	2863.34	3414.95	3205.63	1747.91	2425.99	1557.23	2863.34	3395.61	3205.63	2515.91	2425.99	2918.85	2863.34
ENSG00000156502	SUPV3L1	7.16027	6.72303	3.4461	4.83575	3.41783	4.42494	6.76869	6.72303	3.91132	4.83575	4.48676	4.42494	7.17454	6.72303	5.9476	4.83575	3.85433	4.42494
ENSG00000264440	FAM229B	0	0	0	0	0	0	0	0	0	0	0	0	0	0	0	0	0	0
ENSG00000156500	FAM122C	0.537229	0.513971	0.681081	0.731677	0.665444	0.766668	0.644378	0.513971	0.838859	0.731677	0.70442	0.766668	0.505068	0.513971	0.868434	0.731677	0.88667	0.766668
ENSG00000156504	FAM122B	9.32398	9.33218	8.75626	9.89602	7.77299	8.51795	8.78008	9.33218	10.0924	9.89602	9.26819	8.51795	9.86282	9.33218	9.6843	9.89602	8.57443	8.51795
ENSG00000103642	LACTB	11.6779	8.8398	34.0867	8.83449	27.4177	9.80379	15.839	8.8398	38.8394	8.83449	34.7607	9.80379	16.9165	8.8398	15.6387	8.83449	14.8489	9.80379
ENSG00000103647	CORO2B	1.01722	1.07901	20.3024	3.61295	12.8086	2.46223	0.744773	1.07901	19.5366	3.61295	14.1171	2.46223	0.745483	1.07901	4.395	3.61295	4.98128	2.46223
ENSG00000064687	ABCA7	1.91245	2.23558	0.369151	1.94378	0.863517	3.64041	1.79463	2.23558	0.333775	1.94378	0.765762	3.64041	1.61577	2.23558	0.891905	1.94378	2.80747	3.64041
ENSG00000022556	NLRP2	0.013147	0.00336619	0.0465849	0.00907962	0.0801491	0.00728656	0.0393052	0.00336619	0.024723	0.00907962	0.0324458	0.00728656	0.0182989	0.00336619	0.0257716	0.00907962	0.0128498	0.00728656
ENSG00000181074	OR52N4	0	0.040985	0	0.0736993	0	0	0	0.040985	0	0.0736993	0	0	0	0.040985	0	0.0736993	0	0
ENSG00000076928	ARHGEF1	11.5143	12.6396	13.9527	17.8623	13.1716	16.212	11.4195	12.6396	12.4628	17.8623	11.658	16.212	10.4223	12.6396	13.7703	17.8623	13.8343	16.212
ENSG00000181072	CHRM2	0	0.0102142	0	0.0183673	0	0	0.00496943	0.0102142	0	0.0183673	0	0	0	0.0102142	0	0.0183673	0	0
ENSG00000076924	XAB2	15.0036	15.3298	10.7853	16.8905	11.1563	15.7205	16.6201	15.3298	9.78607	16.8905	9.80259	15.7205	13.0873	15.3298	11.9469	16.8905	12.3252	15.7205
ENSG00000143337	TOR1AIP1	8.68383	8.80309	5.87072	6.94314	6.3766	6.17879	7.52917	8.80309	6.45154	6.94314	7.61299	6.17879	8.69381	8.80309	7.49604	6.94314	6.07457	6.17879
ENSG00000143333	RGS16	51.3816	35.9783	248.067	27.7191	108.237	24.9901	83.495	35.9783	279.948	27.7191	110.521	24.9901	66.0759	35.9783	84.7239	27.7191	50.0613	24.9901
ENSG00000065371	ROPN1	0.00944221	0.00483521	0	0.00434734	0	0	0.0235242	0.00483521	0	0.00434734	0	0	0	0.00483521	0	0.00434734	0.00922877	0
ENSG00000168152	THAP9	0.378392	0.392442	0.0933458	0.269044	0.233602	0.313251	0.295943	0.392442	0.172137	0.269044	0.197729	0.313251	0.581338	0.392442	0.284359	0.269044	0.257482	0.313251
ENSG00000189241	TSPYL1	29.4956	31.3969	33.0531	28.453	31.9314	31.7478	27.2243	31.3969	33.6408	28.453	34.4874	31.7478	26.1398	31.3969	28.2528	28.453	30.3776	31.7478
ENSG00000134028	ADAMDEC1	2.97877	2.41446	25.8369	1.442	42.9392	1.72642	3.23992	2.41446	30.9207	1.442	48.7138	1.72642	3.70539	2.41446	5.70095	1.442	6.52161	1.72642
ENSG00000111837	MAK	0.0900493	0.106788	0.0335873	0.0698275	0.0557942	0.131339	0.113355	0.106788	0.0237667	0.0698275	0.0595462	0.131339	0.121379	0.106788	0.0796333	0.0698275	0.125072	0.131339
ENSG00000111834	RSPH4A	0.109591	0.0823092	0.0388323	0.0269106	0.0675788	0.0728874	0.101933	0.0823092	0.0488501	0.0269106	0.0721233	0.0728874	0.0732175	0.0823092	0.22915	0.0269106	0.114255	0.0728874
ENSG00000111832	RWDD1	4.6527	5.06004	3.9847	4.61092	4.7716	3.44864	4.81864	5.06004	5.1682	4.61092	5.4076	3.44864	5.92365	5.06004	5.28252	4.61092	3.33942	3.44864
ENSG00000262690	NLRP7	0	0	0	0	0	0	0	0	0	0	0	0	0	0	0	0	0	0
ENSG00000171903	CYP4F11	0	0	0.0091287	0	0.00433266	0	0.0102696	0	0	0	0	0	0	0	0	0	0	0
ENSG00000244207	C4A	0	0	0	0	0	0	0	0	0	0	0	0	0	0	0	0	0	0
ENSG00000269808	AC010327.2	10.9203	12.8643	16.339	21.6845	16.1309	14.9151	10.5179	12.8643	17.4778	21.6845	15.0622	14.9151	9.65379	12.8643	14.1458	21.6845	10.4879	14.9151
ENSG00000069509	FUNDC1	0	0	0	0	0	0	0	0	0	0	0	0	0	0	0	0	0	0
ENSG00000269801	ARMCX1	0	0	0	0	0	0	0	0	0	0	0	0	0	0	0	0	0	0
ENSG00000269805	XAGE1A	0	0	0	0	0	0	0	0	0	0	0	0	0	0	0	0	0	0
ENSG00000269804	AL353354.2	53.0588	55.9805	29.0414	48.0939	27.5673	46.9858	47.9725	55.9805	30.0756	48.0939	33.0921	46.9858	54.2618	55.9805	59.3011	48.0939	47.9772	46.9858
ENSG00000167914	GSDMA	0.148874	0.0857653	0.420364	0.137087	0.665044	0.154709	0.101998	0.0857653	0.34217	0.137087	0.793269	0.154709	0.134688	0.0857653	0.302254	0.137087	0.100037	0.154709
ENSG00000263254	FZD9	0	0	0	0	0	0	0	0	0	0	0	0	0	0	0	0	0	0
ENSG00000263255	ZNF486	0	0	0	0	0	0	0	0	0	0	0	0	0	0	0	0	0	0
ENSG00000263258	RDH13	0	0	0	0	0	0	0	0	0	0	0	0	0	0	0	0	0	0
ENSG00000119760	SUPT7L	7.55591	6.65948	5.06007	7.13509	6.03295	8.56727	6.46818	6.65948	5.55936	7.13509	6.31517	8.56727	7.76122	6.65948	8.60027	7.13509	8.84906	8.56727
ENSG00000019995	ZRANB1	5.35264	4.76927	4.90723	5.65258	4.60573	6.96564	4.7925	4.76927	5.31568	5.65258	5.74505	6.96564	5.44354	4.76927	5.72817	5.65258	8.22308	6.96564
ENSG00000198796	ALPK2	0.00880045	0.00901314	0	0.00607779	0.0166503	0.0146326	0.00438507	0.00901314	0.00551642	0.00607779	0.0138211	0.0146326	0	0.00901314	0	0.00607779	0.00215038	0.0146326
ENSG00000019991	HGF	0.0956187	0.0621017	0.00413187	0.206163	0.00392214	0.113746	0.0766964	0.0621017	0.0331359	0.206163	0.0606954	0.113746	0.0805024	0.0621017	0.0757589	0.206163	0.0934572	0.113746
ENSG00000147059	SPIN2A	0.410007	0.0674865	0.00648576	0.0943867	0.0184696	0.300283	0.197001	0.0674865	0.0244768	0.0943867	0.407374	0.300283	0.0081525	0.0674865	0.311647	0.0943867	0.558171	0.300283
ENSG00000135778	NTPCR	1.97494	2.12588	0.988942	1.81497	1.41637	1.92658	1.92118	2.12588	0.982271	1.81497	1.47051	1.92658	2.06209	2.12588	1.83546	1.81497	1.75888	1.92658
ENSG00000135776	ABCB10	14.7673	12.8223	6.60338	13.9259	6.59206	12.3809	13.7836	12.8223	6.73135	13.9259	8.40917	12.3809	14.9233	12.8223	15.9846	13.9259	11.298	12.3809
ENSG00000135775	COG2	3.95483	4.0044	1.17387	2.56627	1.36767	3.1639	3.48609	4.0044	1.16697	2.56627	1.3639	3.1639	3.94518	4.0044	2.74438	2.56627	3.10807	3.1639
ENSG00000139428	MMAB	4.20833	4.51853	0.796735	3.09808	0.91502	2.35088	4.57744	4.51853	0.689836	3.09808	0.976553	2.35088	4.55407	4.51853	1.99007	3.09808	1.5628	2.35088
ENSG00000135773	CAPN9	0.0160041	0.0163908	0.0496199	0.00736851	0.0471012	0	0.00797447	0.0163908	0.0200638	0.00736851	0.0143625	0	0	0.0163908	0	0.00736851	0.00782114	0
ENSG00000147050	KDM6A	0.024393	0.0156141	0.00270105	0.0140386	0	0.027039	0.0303862	0.0156141	0.0509678	0.0140386	0.0957726	0.027039	0.0101855	0.0156141	0	0.0140386	0.0298019	0.027039
ENSG00000152990	GPR125	3.2086	2.67675	0.670304	1.17646	0.734458	1.33406	2.80821	2.67675	0.821957	1.17646	0.749593	1.33406	2.84521	2.67675	1.51914	1.17646	1.08193	1.33406
ENSG00000197774	EME2	5.03554	5.523	5.84743	5.33569	6.28135	6.05681	5.52239	5.523	5.40501	5.33569	5.94791	6.05681	5.18618	5.523	4.86382	5.33569	6.1085	6.05681
ENSG00000132749	MTL5	2.41891	2.17863	0.582962	2.45997	0.598239	3.11898	2.35386	2.17863	0.648124	2.45997	0.590583	3.11898	2.45975	2.17863	1.31493	2.45997	1.9783	3.11898
ENSG00000165646	SLC18A2	1.68509	1.48884	0.432223	0.95417	0.376446	1.30473	1.11284	1.48884	0.681059	0.95417	0.586842	1.30473	1.84273	1.48884	1.48187	0.95417	1.32252	1.30473
ENSG00000132746	ALDH3B2	0.00641399	0	0	0	0	0	0	0	0	0	0.00575609	0	0	0	0	0	0.006269	0
ENSG00000165644	COMTD1	2.73155	3.7525	3.90879	4.37758	3.72142	3.84304	2.81375	3.7525	2.77688	4.37758	3.37063	3.84304	2.99769	3.7525	3.08917	4.37758	2.70831	3.84304
ENSG00000132744	ACY3	0.127688	0.196161	0	0.117579	0.0805275	0.212308	0.23859	0.196161	0.0266797	0.117579	0.0286476	0.212308	0.106635	0.196161	0.107272	0.117579	0.202802	0.212308
ENSG00000165643	SOHLH1	0	0	0.0185009	0	0.0263427	0.0231505	0	0	0	0	0.0468569	0.0231505	0	0	0	0	0	0.0231505
ENSG00000132740	IGHMBP2	3.20627	3.38565	3.7074	3.84791	3.58128	3.71416	3.62061	3.38565	3.51396	3.84791	3.07901	3.71416	2.99121	3.38565	3.12774	3.84791	3.04595	3.71416
ENSG00000153029	MR1	5.92868	6.14537	2.93249	6.9154	3.85905	10.6683	5.46408	6.14537	2.7967	6.9154	4.3075	10.6683	6.1277	6.14537	6.636	6.9154	10.5889	10.6683
ENSG00000187026	KRTAP21-2	0	0	0	0	0.0396537	0.104546	0.046995	0	0	0	0	0.104546	0	0	0	0	0	0.104546
ENSG00000187024	PTRH1	1.55836	1.57238	3.82951	1.67415	3.89235	1.37552	1.80607	1.57238	3.16928	1.67415	3.08191	1.37552	1.61312	1.57238	2.26928	1.67415	1.62467	1.37552
ENSG00000111224	PARP11	0.462286	0.610693	0.228497	0.333146	0.318305	0.367614	0.410618	0.610693	0.377969	0.333146	0.246515	0.367614	0.507292	0.610693	0.367734	0.333146	0.458384	0.367614
ENSG00000187021	PNLIPRP1	0	0	0	0	0	0.00461292	0.0165887	0	0	0	0.00373464	0.00461292	0	0	0	0	0	0.00461292
ENSG00000162148	PPP1R32	0.682997	0.788048	0.375271	0.557275	0.574318	0.814584	0.672029	0.788048	0.491351	0.557275	0.387936	0.814584	0.654619	0.788048	0.561689	0.557275	1.09006	0.814584
ENSG00000188629	ZNF177	0.955879	0.904154	0.345176	0.72883	0.552918	1.03257	0.758429	0.904154	0.625892	0.72883	0.857831	1.03257	0.888101	0.904154	0.907051	0.72883	1.30917	1.03257
ENSG00000180035	ZNF48	2.84305	3.07069	1.56609	3.69475	1.79416	2.62313	2.12632	3.07069	1.61653	3.69475	1.45725	2.62313	2.09197	3.07069	2.42728	3.69475	2.10169	2.62313
ENSG00000188624	IGFL3	0	0	0	0	0	0	0	0	0	0	0	0	0	0	0	0	0.0306348	0
ENSG00000188626	GOLGA8M	2.42468	2.87152	0.0570237	1.85731	0.108258	3.44089	2.16686	2.87152	0.00597787	1.85731	0.0770256	3.44089	2.92287	2.87152	1.0175	1.85731	2.18112	3.44089
ENSG00000066855	MTFR1	8.26116	6.96422	4.39166	6.88893	3.93881	6.80213	7.2857	6.96422	4.67917	6.88893	4.84329	6.80213	8.18055	6.96422	7.2604	6.88893	6.55854	6.80213
ENSG00000188620	HMX3	3.14865	3.87695	4.66959	7.26473	3.03437	5.37256	2.80287	3.87695	4.30218	7.26473	2.68281	5.37256	1.89088	3.87695	5.64711	7.26473	5.01387	5.37256
ENSG00000161681	SHANK1	3.87181	4.42876	13.4837	5.63072	9.90782	4.96353	3.45678	4.42876	11.4153	5.63072	9.90721	4.96353	3.52043	4.42876	4.61038	5.63072	6.37057	4.96353
ENSG00000185774	KCNIP4	0.141289	0.0878557	0.0447	0.13475	0.0636465	0.0783075	0.145831	0.0878557	0.101217	0.13475	0.126796	0.0783075	0.207893	0.0878557	0.101742	0.13475	0.177551	0.0783075
ENSG00000185775	SPATA31A6	0.00963514	0.069076	0	0	0	0.0373811	0	0.069076	0	0	0	0.0373811	0	0.069076	0	0	0.028252	0.0373811
ENSG00000090054	SPTLC1	13.3412	12.1068	10.4867	10.6293	10.3312	10.3871	12.7413	12.1068	11.2783	10.6293	12.2019	10.3871	13.5101	12.1068	12.2248	10.6293	11.0881	10.3871
ENSG00000101096	NFATC2	1.91817	1.74653	1.11801	2.07299	1.33289	3.50302	1.95898	1.74653	1.36457	2.07299	1.4405	3.50302	2.05222	1.74653	1.72789	2.07299	3.14752	3.50302
ENSG00000101098	RIMS4	0.271024	0.314312	0.0564906	0.143134	0.0402174	0.141376	0.262147	0.314312	0.0599601	0.143134	0.0321914	0.141376	0.252966	0.314312	0.107149	0.143134	0.120762	0.141376
ENSG00000213401	MAGEA12	0.021358	0	0	0	0	0	0	0	0	0	0	0	0	0	0	0	0	0
ENSG00000257600	CR388219.1	0	0	0	0	0	0	0	0	0	0	0	0	0	0	0	0	0	0
ENSG00000257601	CR759784.2	0	0	0	0	0	0	0	0	0	0	0	0	0	0	0	0	0	0
ENSG00000112715	VEGFA	4.24159	4.29845	3.56634	3.24908	1.61286	11.2474	4.12095	4.29845	3.67	3.24908	2.10455	11.2474	4.40278	4.29845	4.94449	3.24908	13.1735	11.2474
ENSG00000070495	JMJD6	8.46852	8.75177	11.2929	7.62464	10.6463	6.92437	8.69309	8.75177	11.2026	7.62464	9.82224	6.92437	8.03928	8.75177	6.86447	7.62464	6.70553	6.92437
ENSG00000258405	ZNF578	0.0057725	0.00591201	0	0	0.00970796	0.0159967	0.00575262	0.00591201	0.00241227	0	0.0025902	0.0159967	0.00321382	0.00591201	0	0	0.00564201	0.0159967
ENSG00000090581	GNPTG	18.2404	20.1338	28.2467	20.5791	35.9644	19.6427	19.743	20.1338	26.3669	20.5791	32.6069	19.6427	16.1767	20.1338	17.5583	20.5791	20.5398	19.6427
ENSG00000138468	SENP7	0.707214	0.780788	0.32761	0.899167	0.501933	1.19387	0.659517	0.780788	0.428393	0.899167	0.655052	1.19387	0.834438	0.780788	1.05383	0.899167	1.40465	1.19387
ENSG00000164597	COG5	3.83765	3.46106	3.43647	4.26947	3.46397	5.97343	3.54358	3.46106	3.41838	4.26947	4.3171	5.97343	3.84206	3.46106	4.79285	4.26947	7.10179	5.97343
ENSG00000164591	MYOZ3	0.0153443	0.0235726	0.0135926	0.0211942	0.038708	0.0255131	0.0344057	0.0235726	0.0160305	0.0211942	0.0206555	0.0255131	0.0341715	0.0235726	0.00859394	0.0211942	0.0187467	0.0255131
ENSG00000138463	DIRC2	0.946296	1.01644	1.72766	1.15298	1.79037	1.599	0.908535	1.01644	1.59143	1.15298	1.85381	1.599	0.93162	1.01644	1.23451	1.15298	1.65806	1.599
ENSG00000104112	SCG3	0.300896	0.211865	0.249888	0.161626	0.22139	0.125076	0.224895	0.211865	0.225286	0.161626	0.286909	0.125076	0.300145	0.211865	0.330027	0.161626	0.257332	0.125076
ENSG00000011677	GABRA3	0	0.0202726	0	0.00455677	0.00832227	0	0	0.0202726	0	0.00455677	0.0177638	0	0	0.0202726	0	0.00455677	0	0
ENSG00000125285	SOX21	0	0	0.014681	0	0.0278716	0	0	0	0.0554051	0	0.0446189	0	0	0	0	0	0.0485948	0
ENSG00000184825	HIST1H2AH	0.317822	0.093001	0	0.167235	0.0763572	0.0503283	0.0904937	0.093001	0.037947	0.167235	0.0814921	0.0503283	0	0.093001	0	0.167235	0.0887537	0.0503283
ENSG00000181852	RNF41	10.1406	10.0021	11.3881	18.2218	9.49241	24.4638	10.0811	10.0021	11.0245	18.2218	9.95829	24.4638	9.86495	10.0021	18.8544	18.2218	23.0542	24.4638
ENSG00000181856	SLC2A4	0.0102567	0.0525228	0.00454292	0.028334	0.0129369	0.0170539	0.0204427	0.0525228	0.0214308	0.028334	0.0184092	0.0170539	0.0571038	0.0525228	0.0172336	0.028334	0.0300745	0.0170539
ENSG00000168930	TRIM49	0.0287785	0	0	0	0	0.053167	0.0191196	0	0	0	0	0.053167	0	0	0	0	0.0562558	0.053167
ENSG00000168936	TMEM129	6.29953	8.11257	8.4694	8.5652	9.80859	12.195	6.46407	8.11257	6.37847	8.5652	9.1103	12.195	5.59145	8.11257	7.5156	8.5652	11.1653	12.195
ENSG00000168939	SPRY3	0.326688	0.442969	0.185457	0.23727	0.152829	0.321322	0.369124	0.442969	0.23266	0.23727	0.31176	0.321322	0.476481	0.442969	0.172662	0.23727	0.357529	0.321322
ENSG00000168938	PPIC	9.92958	11.6788	5.57201	10.637	8.308	12.9033	9.62927	11.6788	4.90166	10.637	8.13889	12.9033	9.73503	11.6788	8.4306	10.637	10.3044	12.9033
ENSG00000197506	SLC28A3	0.0686661	0.0868728	0.0536713	0.0632298	0.00679293	0.197002	0.0805054	0.0868728	0.0573896	0.0632298	0.00724973	0.197002	0.0629664	0.0868728	0.203602	0.0632298	0.809314	0.197002
ENSG00000186086	NBPF6	1.81631	1.99034	1.26466	1.70004	1.47701	1.35879	2.04096	1.99034	1.3806	1.70004	1.56963	1.35879	2.18891	1.99034	1.80848	1.70004	1.77525	1.35879
ENSG00000126883	NUP214	6.81174	6.93555	3.66455	6.29741	4.35789	5.29411	6.79622	6.93555	3.75321	6.29741	4.28756	5.29411	6.58547	6.93555	5.37845	6.29741	4.4437	5.29411
ENSG00000126882	FAM78A	29.6919	32.906	11.9997	27.6088	14.6904	28.8933	26.7544	32.906	11.2742	27.6088	13.843	28.8933	24.6377	32.906	20.943	27.6088	20.5531	28.8933
ENSG00000186088	GSAP	3.18581	1.97138	2.74658	1.17174	2.58196	1.49484	5.17577	1.97138	3.44293	1.17174	3.49207	1.49484	5.87551	1.97138	3.34394	1.17174	2.22156	1.49484
ENSG00000204928	GRXCR2	0.0277768	0.113792	0.0246059	0.0255777	0.0467139	0.307899	0.0276811	0.113792	0.092861	0.0255777	0	0.307899	0	0.113792	0.0622284	0.0255777	0.515829	0.307899
ENSG00000204923	FBXO48	1.04003	0.765116	0.480115	0.677801	0.76676	1.2665	0.992651	0.765116	0.973295	0.677801	1.07466	1.2665	0.950101	0.765116	0.935272	0.677801	1.20264	1.2665
ENSG00000204922	C11orf83	5.33009	6.07923	2.64442	5.4021	2.71391	4.24896	5.19101	6.07923	2.35756	5.4021	2.68676	4.24896	5.55926	6.07923	3.64433	5.4021	2.76548	4.24896
ENSG00000204920	ZNF155	1.92637	1.81213	2.41794	2.2076	2.3663	3.0457	1.81743	1.81213	2.21567	2.2076	2.59046	3.0457	2.22569	1.81213	2.44193	2.2076	2.82719	3.0457
ENSG00000008441	NFIX	3.27932	3.76659	1.04999	2.49216	1.1019	2.69708	3.11381	3.76659	0.853055	2.49216	0.995756	2.69708	3.00626	3.76659	1.9178	2.49216	1.91153	2.69708
ENSG00000182508	LHFPL1	0.0450337	0.023061	0.0299196	0.0829368	0.00946697	0.0623983	0.0224393	0.023061	0.0752763	0.0829368	0.0606216	0.0623983	0.0626809	0.023061	0.214389	0.0829368	0.0440157	0.0623983
ENSG00000182504	CEP97	1.15153	1.17713	0.585101	1.66457	0.524342	1.14639	1.14756	1.17713	0.713646	1.66457	0.758486	1.14639	1.47093	1.17713	1.63305	1.66457	1.28052	1.14639
ENSG00000182500	ORAI1	16.6874	17.4851	6.91203	19.4021	8.19568	17.034	18.5854	17.4851	6.1612	19.4021	6.73908	17.034	15.7635	17.4851	11.7598	19.4021	12.4029	17.034
ENSG00000121542	SEC22A	1.65623	1.75959	1.05636	1.37056	1.29984	1.49319	1.67253	1.75959	1.08155	1.37056	1.38329	1.49319	1.78519	1.75959	1.59797	1.37056	1.54972	1.49319
ENSG00000124216	SNAI1	4.44276	4.42409	2.47474	3.20709	3.33223	5.08838	6.57373	4.42409	2.64344	3.20709	2.71693	5.08838	6.35845	4.42409	4.20457	3.20709	6.80819	5.08838
ENSG00000104808	DHDH	0.230334	0.098292	0.0510101	0.141399	0.193683	0.106383	0.0765136	0.098292	0.0481271	0.141399	0.0861283	0.106383	0.0641189	0.098292	0.086003	0.141399	0.187606	0.106383
ENSG00000104805	NUCB1	54.1737	58.1818	48.6945	64.3518	68.718	78.6453	54.9902	58.1818	42.185	64.3518	57.2581	78.6453	48.7846	58.1818	51.4141	64.3518	67.9905	78.6453
ENSG00000104804	TULP2	0.0277892	0.00948694	0.0410282	0.00852971	0.00778912	0.0308036	0.00923116	0.00948694	0.0232256	0.00852971	0.00831292	0.0308036	0.0515718	0.00948694	0	0.00852971	0.054322	0.0308036
ENSG00000167685	ZNF444	2.51089	2.75065	4.03465	3.52095	4.00339	3.40918	3.07925	2.75065	3.48081	3.52095	3.60123	3.40918	2.41287	2.75065	3.64094	3.52095	3.40385	3.40918
ENSG00000112159	MDN1	10.1203	8.94377	3.6698	7.31004	2.97703	5.31169	9.78088	8.94377	4.39092	7.31004	3.61668	5.31169	9.66173	8.94377	7.86406	7.31004	4.6585	5.31169
ENSG00000106400	ZNHIT1	9.9717	10.394	13.9473	12.5042	13.4736	10.5984	9.90358	10.394	12.4855	12.5042	12.0783	10.5984	8.88526	10.394	11.1656	12.5042	10.4014	10.5984
ENSG00000177504	VCX2	0.0767544	0	0	0	0	0.0283601	0.0509934	0	0	0	0	0.0283601	0.0284885	0	0	0	0	0.0283601
ENSG00000106404	CLDN15	2.86172	3.62871	2.03947	3.66545	2.05053	4.55548	2.93763	3.62871	1.9302	3.66545	1.69925	4.55548	2.86706	3.62871	3.96075	3.66545	4.33224	4.55548
ENSG00000177508	IRX3	16.9644	19.8418	8.61257	18.5552	7.89369	10.8008	16.1104	19.8418	7.01178	18.5552	7.24752	10.8008	14.3578	19.8418	8.21585	18.5552	7.72613	10.8008
ENSG00000187840	EIF4EBP1	55.5763	63.4749	40.1188	81.8038	45.676	134.978	48.4088	63.4749	36.5907	81.8038	38.2831	134.978	44.0121	63.4749	74.7307	81.8038	96.6949	134.978
ENSG00000187848	P2RX2	0.104215	0.0853872	0.0184637	0.0575788	0.0175265	0.023104	0.0519282	0.0853872	0.0174202	0.0575788	0.0187051	0.023104	0.0696259	0.0853872	0.0700421	0.0575788	0	0.023104
ENSG00000123933	MXD4	11.4124	11.7755	18.7583	11.765	22.0431	11.5391	11.7217	11.7755	15.87	11.765	18.4257	11.5391	10.5013	11.7755	9.49715	11.765	11.482	11.5391
ENSG00000140526	ABHD2	31.2292	30.4022	27.8064	27.1555	22.0098	24.9009	24.7894	30.4022	29.564	27.1555	24.2729	24.9009	25.8847	30.4022	32.5864	27.1555	28.6746	24.9009
ENSG00000140527	WDR93	0.0663079	0.0992537	0.0271101	0.0704519	0.021445	0.0904623	0.0813286	0.0992537	0.00426298	0.0704519	0.0183097	0.0904623	0.0908719	0.0992537	0.0342807	0.0704519	0.0847502	0.0904623
ENSG00000140525	FANCI	7.00545	7.1009	3.13481	9.5791	2.82971	6.4361	6.45433	7.1009	3.34603	9.5791	3.3963	6.4361	7.55667	7.1009	8.63397	9.5791	5.04852	6.4361
ENSG00000140522	RLBP1	0	0.032117	0	0.0192509	0.0175795	0	0	0.032117	0	0.0192509	0.0281425	0	0	0.032117	0.023418	0.0192509	0	0
ENSG00000140521	POLG	14.7786	14.6976	16.0702	15.402	15.9929	13.5779	16.4592	14.6976	15.2874	15.402	15.4013	13.5779	13.7814	14.6976	13.2501	15.402	11.9209	13.5779
ENSG00000167107	ACSF2	0.683648	0.901791	0.13317	1.24586	0.583895	2.0433	0.699129	0.901791	0.236329	1.24586	0.562129	2.0433	0.765224	0.901791	1.17074	1.24586	1.54979	2.0433
ENSG00000167106	FAM102A	2.40147	2.58144	1.60002	2.5465	1.82485	2.21705	2.26778	2.58144	1.44704	2.5465	1.81936	2.21705	2.18164	2.58144	1.3793	2.5465	1.74875	2.21705
ENSG00000167105	TMEM92	0	0.0137146	0.10083	0.0431578	0.0506708	0.0445305	0.0133448	0.0137146	0.0559593	0.0431578	0.0721043	0.0445305	0.00745537	0.0137146	0.0149999	0.0431578	0.0392647	0.0445305
ENSG00000167104	BPIFB6	0	0	0.010967	0.0114001	0	0	0	0	0	0.0114001	0	0	0	0	0	0.0114001	0	0
ENSG00000167103	PIP5KL1	1.40978	1.66011	0.467631	1.0637	0.673674	1.14277	1.48539	1.66011	0.51906	1.0637	0.540626	1.14277	1.5767	1.66011	0.681756	1.0637	0.734483	1.14277
ENSG00000167100	SAMD14	0.869482	0.893524	1.24179	1.71022	1.90243	1.81614	0.783965	0.893524	0.860169	1.71022	1.59775	1.81614	0.763992	0.893524	1.15947	1.71022	1.51466	1.81614
ENSG00000166851	PLK1	3.82728	4.45551	1.34766	19.8291	1.21327	10.4708	3.66206	4.45551	1.43543	19.8291	1.21662	10.4708	3.65978	4.45551	9.21392	19.8291	5.44924	10.4708
ENSG00000166856	GPR182	0	0	0.0217009	0	0	0.0543094	0.048826	0	0.0204744	0	0.0439692	0.0543094	0.0272777	0	0	0	0.0239436	0.0543094
ENSG00000166855	CLPX	7.58767	7.7049	6.20317	7.87564	5.92983	8.73504	6.93678	7.7049	6.59248	7.87564	7.56294	8.73504	8.19921	7.7049	9.12073	7.87564	8.67136	8.73504
ENSG00000163374	YY1AP1	18.7836	18.978	14.6846	17.9471	15.026	18.1771	20.2388	18.978	14.5667	17.9471	15.0892	18.1771	18.9627	18.978	16.2692	17.9471	17.2217	18.1771
ENSG00000163376	KBTBD8	2.32444	2.47029	1.79153	1.47935	1.39139	1.12574	2.12449	2.47029	2.30126	1.47935	1.74424	1.12574	2.70036	2.47029	1.95157	1.47935	0.885655	1.12574
ENSG00000163377	FAM19A4	0	0	0	0.0166724	0	0	0	0	0	0.0166724	0	0	0	0	0	0.0166724	0	0
ENSG00000163378	EOGT	2.381	2.22028	2.0083	2.52747	2.18134	2.98141	1.94072	2.22028	2.27559	2.52747	2.59183	2.98141	2.61441	2.22028	3.04986	2.52747	3.07418	2.98141
ENSG00000056586	RC3H2	5.06825	4.69375	4.30659	4.40882	4.17867	5.30525	5.04363	4.69375	5.38204	4.40882	6.03063	5.30525	6.14377	4.69375	5.99932	4.40882	6.16926	5.30525
ENSG00000178882	FAM101A	0.726818	0.794487	1.53533	0.714324	1.28698	0.790166	1.00986	0.794487	1.24412	0.714324	1.57422	0.790166	0.918253	0.794487	1.04117	0.714324	0.956292	0.790166
ENSG00000227816	TAP1	0	0	0	0	0	0	0	0	0	0	0	0	0	0	0	0	0	0
ENSG00000128849	CGNL1	0.0167816	0.0245531	0.00849481	0.0662272	0.0241908	0.138186	0.0167238	0.0245531	0.00400735	0.0662272	0.00860586	0.138186	0.0640671	0.0245531	0.0349105	0.0662272	0.0726386	0.138186
ENSG00000225526	C3orf83	0.340338	0.38342	0.0803964	0.156697	0.0953944	0.251504	0.32786	0.38342	0.066371	0.156697	0.0814475	0.251504	0.517918	0.38342	0.279569	0.156697	0.277204	0.251504
ENSG00000241132	LY6G5B	0	0	0	0	0	0	0	0	0	0	0	0	0	0	0	0	0	0
ENSG00000157005	SST	0	0	0	0	0	0	0	0	0	0	0	0	0	0	0	0	0	0
ENSG00000184014	DENND5A	1.90745	1.37117	13.0437	2.68437	9.47837	4.03458	3.75634	1.37117	14.4662	2.68437	10.3031	4.03458	3.37693	1.37117	4.45872	2.68437	4.65498	4.03458
ENSG00000184012	TMPRSS2	0	0	0	0	0	0	0	0	0.0850505	0	0.0974121	0	0	0	0	0	0.00663077	0
ENSG00000179820	MYADM	19.829	22.3668	10.5282	25.1063	11.1807	16.4474	17.9039	22.3668	9.58399	25.1063	10.1136	16.4474	16.9682	22.3668	9.25266	25.1063	10.0104	16.4474
ENSG00000179826	MRGPRX3	0.011918	0	0	0	0	0.0132108	0.0237539	0	0	0	0	0.0132108	0	0	0	0	0.0116486	0.0132108
ENSG00000162426	SLC45A1	0.00718465	0.0441497	0.120925	0.086006	0.175201	0.031856	0.0214797	0.0441497	0.0780621	0.086006	0.103163	0.031856	0.0160001	0.0441497	0.0321916	0.086006	0.0772446	0.031856
ENSG00000268206	AC061975.10	0	0	0	0	0	0.326242	0	0	0	0	0.264127	0.326242	0	0	0	0	0	0.326242
ENSG00000268208	AC008372.1	0	0	0	0	0	0	0	0	0.525509	0	0	0	0	0	0	0	0	0
ENSG00000204118	NAP1L6	0	0	0	0	0	0.0225049	0	0	0	0	0.00911005	0.0225049	0	0	0	0	0	0.0225049
ENSG00000204116	CHIC1	0.708687	0.682939	0.347004	0.70765	0.555689	0.775617	0.578108	0.682939	0.459849	0.70765	0.67893	0.775617	0.892336	0.682939	0.964662	0.70765	0.657595	0.775617
ENSG00000137145	DENND4C	5.17121	4.86394	2.71154	4.40999	3.79922	7.537	3.33377	4.86394	3.00386	4.40999	5.00558	7.537	4.73165	4.86394	6.25783	4.40999	9.33789	7.537
ENSG00000137142	IGFBPL1	0.626465	0.116655	0.25225	0.41954	0.399077	0.420861	0.227021	0.116655	0.190395	0.41954	0.221475	0.420861	0.190245	0.116655	0.489088	0.41954	0.166992	0.420861
ENSG00000173976	RAX2	0.0256375	0	0	0.0157385	0	0	0	0	0	0.0157385	0	0	0.0190315	0	0	0.0157385	0	0
ENSG00000233889	AL353698.1	0	0	0	0.0303761	0	0.018283	0	0	0.0137852	0.0303761	0	0.018283	0	0	0	0.0303761	0	0.018283
ENSG00000270370	NLRP2	0	0	0	0	0	0	0	0	0	0	0	0	0	0	0	0	0	0
ENSG00000270379	C17orf66	0	0	0	0	0	0	0	0	0	0	0	0	0	0	0	0	0	0
ENSG00000100077	ADRBK2	2.32134	1.79005	0.325321	1.27544	0.22684	1.26145	3.29381	1.79005	0.267147	1.27544	0.246163	1.26145	3.4077	1.79005	1.27981	1.27544	1.02586	1.26145
ENSG00000159123	DMRTC1	0.0111977	0	0	0	0	0	0	0	0	0	0.0100491	0	0	0	0	0	0.0109445	0
ENSG00000001561	ENPP4	3.83221	3.87914	5.24822	4.18611	6.27604	5.01936	3.32108	3.87914	5.96206	4.18611	8.71993	5.01936	4.09825	3.87914	6.17163	4.18611	6.16561	5.01936
ENSG00000159128	IFNGR2	53.6467	38.2082	68.8839	44.8294	65.9002	43.7855	71.562	38.2082	76.5499	44.8294	59.4046	43.7855	67.8217	38.2082	81.246	44.8294	61.608	43.7855
ENSG00000122912	SLC25A16	2.22494	2.27871	0.905508	1.66984	1.11406	1.72758	2.27813	2.27871	1.14502	1.66984	1.45346	1.72758	2.30598	2.27871	1.58815	1.66984	1.45063	1.72758
ENSG00000253251	CTC-534A2.2	1.38399	1.4499	1.31023	1.19659	1.50135	1.26477	1.25288	1.4499	1.71299	1.19659	1.59283	1.26477	1.5293	1.4499	1.99998	1.19659	1.56955	1.26477
ENSG00000129038	LOXL1	0	0	0	0.00525338	0	0.0063239	0	0	0	0.00525338	0	0.0063239	0	0	0	0.00525338	0	0.0063239
ENSG00000154065	ANKRD29	0.139148	0.18891	0.042999	0.104293	0.00544218	0.125546	0.11287	0.18891	0.0189321	0.104293	0.0145204	0.125546	0.147734	0.18891	0.0507474	0.104293	0.117026	0.125546
ENSG00000205246	RPSAP58	7.96595	7.16688	3.73749	10.3651	2.81969	7.03263	5.71856	7.16688	3.67099	10.3651	3.36957	7.03263	7.52902	7.16688	6.35725	10.3651	5.66246	7.03263
ENSG00000117477	CCDC181	0.0394623	0.0161664	0.027966	0.0799438	0	0.0349943	0.0235958	0.0161664	0.0329817	0.0799438	0.0495803	0.0349943	0.0527292	0.0161664	0.00884075	0.0799438	0.0462843	0.0349943
ENSG00000120519	SLC10A7	0.979499	0.949204	0.293805	1.00756	0.417033	1.06513	0.997749	0.949204	0.437819	1.00756	0.486804	1.06513	1.34608	0.949204	1.08677	1.00756	1.17852	1.06513
ENSG00000155330	C16orf87	1.1374	1.08495	0.570459	0.967778	0.555567	1.09701	0.894566	1.08495	0.773542	0.967778	0.835603	1.09701	1.14543	1.08495	1.14291	0.967778	1.19343	1.09701
ENSG00000037749	MFAP3	4.71483	5.02322	2.72919	3.629	3.02848	4.06877	4.09657	5.02322	3.21928	3.629	3.98338	4.06877	5.47735	5.02322	5.19754	3.629	4.86973	4.06877
ENSG00000273054	KRTAP10-3	0	0	0	0	0	0	0	0	0	0	0	0	0	0	0	0	0	0
ENSG00000273057	MBOAT7	0	0	0	0	0	0	0	0	0	0	0	0	0	0	0	0	0	0
ENSG00000273050	PRH2	0	0	0	0	0	0	0	0	0	0	0	0	0	0	0	0	0	0
ENSG00000273053	TSEN34	0	0	0	0	0	0	0	0	0	0	0	0	0	0	0	0	0	0
ENSG00000273052	NDUFA3	0	0	0	0	0	0	0	0	0	0	0	0	0	0	0	0	0	0
ENSG00000170523	KRT83	0.0110663	0	0.00980301	0	0	0.0122667	0	0	0	0	0	0.0122667	0	0	0	0	0	0.0122667
ENSG00000170522	ELOVL6	0.00568707	0.00582451	0	0.0130921	0.0119553	0.00945595	0.00566748	0.00582451	0.00950626	0.0130921	0.0331742	0.00945595	0	0.00582451	0	0.0130921	0.00555851	0.00945595
ENSG00000170525	PFKFB3	16.9061	16.8616	26.6476	13.7136	21.8679	12.6055	18.8768	16.8616	29.0492	13.7136	23.0659	12.6055	16.0944	16.8616	13.4145	13.7136	11.5473	12.6055
ENSG00000198558	HIST1H4L	0	0	0	0.104981	0	0.0631869	0	0	0.0952846	0.104981	0	0.0631869	0	0	0	0.104981	0.11143	0.0631869
ENSG00000134551	PRH2	0	0	0	0.0252398	0	0.0911494	0.0273155	0	0.0229086	0.0252398	0.0245983	0.0911494	0	0	0.0307032	0.0252398	0.0535805	0.0911494
ENSG00000198551	ZNF627	3.50249	3.80925	2.96818	4.07394	2.82663	3.96055	3.06358	3.80925	3.1856	4.07394	3.29406	3.96055	3.77926	3.80925	5.0165	4.07394	5.23036	3.96055
ENSG00000198556	ZNF789	4.13868	4.12423	1.68597	4.25702	1.6761	4.08859	3.92021	4.12423	1.93061	4.25702	2.07302	4.08859	4.80545	4.12423	4.44466	4.25702	2.97087	4.08859
ENSG00000198554	WDHD1	3.81514	3.36484	0.771497	2.58844	0.688614	1.91637	3.43281	3.36484	0.928879	2.58844	0.950732	1.91637	4.49419	3.36484	2.84295	2.58844	1.66117	1.91637
ENSG00000075223	SEMA3C	0.347587	0.223763	4.26966	0.0762068	4.46212	0.0256861	0.458554	0.223763	5.14886	0.0762068	6.13172	0.0256861	0.549222	0.223763	0.33002	0.0762068	0.220015	0.0256861
ENSG00000138411	HECW2	0.0212528	0.0200921	0.0550318	0.022581	0.0481143	0.0308068	0.04073	0.0200921	0.0341589	0.022581	0.0674884	0.0308068	0.0182037	0.0200921	0.0384564	0.022581	0.0415447	0.0308068
ENSG00000160714	UBE2Q1	38.2473	37.0011	38.78	31.7846	38.0695	30.7773	37.3304	37.0011	37.576	31.7846	37.5193	30.7773	37.4575	37.0011	32.6934	31.7846	31.9044	30.7773
ENSG00000160712	IL6R	101.6	109.256	50.1316	70.6036	37.3654	61.0445	96.4225	109.256	49.6605	70.6036	36.7164	61.0445	99.3447	109.256	50.5629	70.6036	47.2875	61.0445
ENSG00000160710	ADAR	61.2645	56.9111	36.4203	49.0697	42.4853	64.8273	70.4693	56.9111	36.128	49.0697	42.403	64.8273	66.6388	56.9111	70.8312	49.0697	60.8431	64.8273
ENSG00000096088	PGC	0	0	0.00907686	0.00943534	0.00861611	0	0	0	0	0.00943534	0.00919552	0	0.0228189	0	0	0.00943534	0	0
ENSG00000136950	ARPC5L	16.3931	17.0195	13.9399	16.1193	13.0821	21.6396	16.4515	17.0195	14.5871	16.1193	14.1687	21.6396	15.5332	17.0195	15.1227	16.1193	17.4868	21.6396
ENSG00000243215	HLA-DMA	0	0	0	0	0	0	0	0	0	0	0	0	0	0	0	0	0	0
ENSG00000083307	GRHL2	0.00684794	0.00350672	0	0.00630579	0	0	0	0.00350672	0	0.00630579	0	0	0	0.00350672	0	0.00630579	0.0133863	0
ENSG00000096080	MRPS18A	28.6838	29.3273	21.5872	34.5525	22.3938	38.0468	26.7652	29.3273	19.03	34.5525	19.8826	38.0468	24.2738	29.3273	31.1889	34.5525	32.2999	38.0468
ENSG00000258869	RP11-204N11.1	0	0	0	0	0	0	0	0	0	0	0	0	0	0	0	0	0	0
ENSG00000175467	SART1	23.8451	25.5717	25.4429	26.6599	27.1744	21.2071	25.7911	25.5717	22.8416	26.6599	23.6908	21.2071	22.1689	25.5717	20.538	26.6599	17.6344	21.2071
ENSG00000175463	TBC1D10C	1.35429	1.18342	0.93921	1.72379	1.57412	2.25409	0.714024	1.18342	0.823821	1.72379	1.44953	2.25409	0.74247	1.18342	1.3732	1.72379	2.31543	2.25409
ENSG00000105402	NAPA	18.7166	18.8851	27.7299	21.0143	27.909	19.9827	19.9412	18.8851	24.6391	21.0143	23.3344	19.9827	17.4736	18.8851	23.3259	21.0143	18.0851	19.9827
ENSG00000105401	CDC37	92.0855	96.093	123.569	95.8909	104.932	94.0346	99.6084	96.093	114.361	95.8909	98.2299	94.0346	91.1252	96.093	93.3361	95.8909	100.914	94.0346
ENSG00000105404	RABAC1	16.4935	20.177	34.0304	23.6562	42.0873	28.0741	18.1745	20.177	27.9342	23.6562	35.4999	28.0741	15.6725	20.177	20.6611	23.6562	26.8543	28.0741
ENSG00000131459	GFPT2	0.0911579	0.0133373	2.4687	0.0479663	1.2812	0.0433055	0.0692144	0.0133373	3.10919	0.0479663	1.39073	0.0433055	0.0773362	0.0133373	0.0437617	0.0479663	0.0339418	0.0433055
ENSG00000105409	ATP1A3	0.282442	0.389883	0.119661	0.290236	0.185869	0.186033	0.379372	0.389883	0.0821075	0.290236	0.161634	0.186033	0.360077	0.389883	0.11463	0.290236	0.14403	0.186033
ENSG00000135917	SLC19A3	0.011681	0.00797551	0	0	0	0	0	0.00797551	0	0	0	0	0.00867111	0.00797551	0	0	0	0
ENSG00000181218	HIST3H2A	6.35865	8.26894	26.311	8.97546	17.729	15.0706	6.67026	8.26894	18.8102	8.97546	16.8565	15.0706	4.47178	8.26894	9.27818	8.97546	15.0875	15.0706
ENSG00000132185	FCRLA	0.228084	0.142753	3.60317	0.210026	2.58385	0.189619	0.220984	0.142753	3.06592	0.210026	2.66663	0.189619	0.204587	0.142753	0.220004	0.210026	0.45824	0.189619
ENSG00000108639	SYNGR2	29.0357	32.2986	36.8831	36.5294	35.7903	31.8071	30.8644	32.2986	30.2566	36.5294	28.4022	31.8071	27.7772	32.2986	33.654	36.5294	27.9114	31.8071
ENSG00000132182	NUP210	29.2899	32.736	5.95011	45.2087	7.72132	36.1927	26.6562	32.736	5.13046	45.2087	6.75863	36.1927	25.5163	32.736	25.6063	45.2087	23.8206	36.1927
ENSG00000116991	SIPA1L2	2.30004	2.45853	5.79492	1.01772	6.57626	1.64952	1.80501	2.45853	5.86684	1.01772	7.23051	1.64952	2.1801	2.45853	1.20455	1.01772	2.20293	1.64952
ENSG00000105605	CACNG7	0	0	0	0.00682377	0	0	0.00738493	0	0	0.00682377	0	0	0	0	0	0.00682377	0	0
ENSG00000166333	ILK	24.3443	23.8342	59.1652	42.0973	64.1476	37.0073	28.3626	23.8342	53.8682	42.0973	58.0674	37.0073	24.8388	23.8342	39.6656	42.0973	39.3248	37.0073
ENSG00000135205	CCDC146	0.316569	0.257469	0.367035	0.282933	0.528479	0.448957	0.329397	0.257469	0.369637	0.282933	0.551484	0.448957	0.471726	0.257469	0.50062	0.282933	0.632477	0.448957
ENSG00000131981	LGALS3	71.5034	71.3481	71.5784	25.8961	59.3088	48.6828	64.549	71.3481	75.1743	25.8961	60.4713	48.6828	69.6893	71.3481	32.6578	25.8961	59.1026	48.6828
ENSG00000188021	UBQLN2	11.7162	11.3901	9.59902	9.77129	10.0561	10.9617	11.9118	11.3901	10.6141	9.77129	10.7651	10.9617	12.0591	11.3901	9.62197	9.77129	11.6946	10.9617
ENSG00000188026	RILPL1	0.627487	0.61025	1.05099	0.509832	1.59179	0.917663	0.514975	0.61025	0.978368	0.509832	1.50482	0.917663	0.428616	0.61025	0.626096	0.509832	1.09261	0.917663
ENSG00000244242	IFITM10	12.2353	13.0063	18.5458	7.58431	25.7739	8.76443	12.2018	13.0063	13.9815	7.58431	22.4705	8.76443	10.9146	13.0063	7.02031	7.58431	8.71575	8.76443
ENSG00000240747	KRBOX1	0	0	0	0	0	0.0156303	0.0140522	0	0	0	0	0.0156303	0	0	0	0	0	0.0156303
ENSG00000084652	TXLNA	25.3318	24.8737	20.6499	22.4651	20.2889	21.729	25.8645	24.8737	18.956	22.4651	19.1099	21.729	24.8835	24.8737	17.5262	22.4651	19.5529	21.729
ENSG00000214694	ARHGEF33	0.0529125	0.0116124	0.00669604	0.0313222	0.00953422	0.0335155	0.033898	0.0116124	0.0031588	0.0313222	0.0237425	0.0335155	0.0294589	0.0116124	0.0465693	0.0313222	0.0369403	0.0335155
ENSG00000172167	MTBP	2.09586	2.33028	2.06633	2.22596	2.38265	2.88674	1.59194	2.33028	2.21198	2.22596	2.64799	2.88674	2.23383	2.33028	2.25556	2.22596	3.54892	2.88674
ENSG00000172164	SNTB1	16.1978	16.8538	25.9568	18.3844	27.3183	34.3586	10.7205	16.8538	27.3968	18.3844	33.9328	34.3586	12.9338	16.8538	18.0888	18.3844	39.6377	34.3586
ENSG00000148386	LCN9	0	0.0384629	0	0	0	0	0	0.0384629	0	0	0	0	0	0.0384629	0	0	0	0
ENSG00000148384	INPP5E	6.18688	6.59937	6.00051	6.91304	7.13533	5.46878	6.71389	6.59937	5.49787	6.91304	6.41912	5.46878	6.17428	6.59937	5.56063	6.91304	4.78623	5.46878
ENSG00000020426	MNAT1	2.05614	2.22679	1.06051	2.00211	1.20079	2.52911	1.71735	2.22679	1.01852	2.00211	1.42126	2.52911	2.40307	2.22679	1.97845	2.00211	2.13034	2.52911
ENSG00000101871	MID1	0.0438616	0.084228	0.0121421	0.118643	0.032272	0.106355	0.0409786	0.084228	0.00458232	0.118643	0.0295219	0.106355	0.0244198	0.084228	0.0706267	0.118643	0.056267	0.106355
ENSG00000138115	CYP2C8	0.0330797	0.0084698	0	0	0	0.00916701	0	0.0084698	0.0691183	0	0.0593732	0.00916701	0.0276256	0.0084698	0	0	0.0404149	0.00916701
ENSG00000138111	TMEM180	3.11701	3.98764	4.95955	3.87532	6.52973	4.71919	3.32274	3.98764	3.87592	3.87532	5.61406	4.71919	3.12611	3.98764	3.94164	3.87532	4.64412	4.71919
ENSG00000172789	HOXC5	0	0	0	0	0	0	0	0	0.0192153	0	0	0	0	0	0.0257533	0	0	0
ENSG00000172785	CBWD1	9.57222	9.65663	3.44766	10.0203	3.45081	7.99768	8.37719	9.65663	4.02383	10.0203	3.92091	7.99768	10.7924	9.65663	11.1297	10.0203	7.21009	7.99768
ENSG00000138119	MYOF	5.02924	5.21829	9.36225	11.6182	9.04099	13.5662	4.62021	5.21829	10.9837	11.6182	11.0446	13.5662	4.69206	5.21829	11.4721	11.6182	12.6229	13.5662
ENSG00000172780	RAB43	8.04445	9.23093	12.3446	14.5204	12.8401	20.6774	8.76248	9.23093	10.1042	14.5204	11.383	20.6774	7.90662	9.23093	12.4245	14.5204	17.2815	20.6774
ENSG00000150201	FXYD4	0	0	0	0	0	0.0297158	0	0	0	0	0	0.0297158	0.0298504	0	0	0	0.0262018	0.0297158
ENSG00000144724	PTPRG	4.42246	4.2853	3.47786	3.79937	3.35261	4.81414	4.35917	4.2853	3.76377	3.79937	4.22977	4.81414	4.72223	4.2853	5.9357	3.79937	6.69723	4.81414
ENSG00000271542	LENG1	0	0	0	0	0	0	0	0	0	0	0	0	0	0	0	0	0	0
ENSG00000196924	FLNA	2.10139	2.45533	3.78032	2.34658	5.06369	3.22457	2.2309	2.45533	2.87856	2.34658	3.97575	3.22457	1.75491	2.45533	1.69514	2.34658	3.0291	3.22457
ENSG00000196923	PDLIM7	29.0499	37.4817	43.7223	51.1199	43.7913	45.5773	28.8936	37.4817	35.9507	51.1199	37.2165	45.5773	25.2432	37.4817	40.0135	51.1199	36.948	45.5773
ENSG00000184557	SOCS3	1.20131	1.0201	7.57721	1.6243	4.44342	1.10407	2.56862	1.0201	7.04093	1.6243	4.63988	1.10407	2.54832	1.0201	1.20087	1.6243	1.12957	1.10407
ENSG00000137497	NUMA1	10.1387	11.0347	10.6922	17.0165	11.4146	12.9696	9.53283	11.0347	9.47688	17.0165	10.4048	12.9696	8.8076	11.0347	12.8511	17.0165	11.1653	12.9696
ENSG00000265570	BOLA1	0	0	0	0	0	0	0	0	0	0	0	0	0	0	0	0	0	0
ENSG00000173786	CNP	18.961	20.7185	18.5935	22.9582	20.2788	22.7863	20.675	20.7185	17.2647	22.9582	19.3581	22.7863	19.0004	20.7185	24.7196	22.9582	22.8146	22.7863
ENSG00000117877	CD3EAP	14.4412	15.9975	21.2274	11.2573	10.9137	8.3745	12.5614	15.9975	21.0318	11.2573	11.4391	8.3745	11.7572	15.9975	10.7736	11.2573	7.68887	8.3745
ENSG00000232126	HLA-B	0	0	0	0	0	0	0	0	0	0	0	0	0	0	0	0	0	0
ENSG00000203624	MRPS18B	0	0	0	0	0	0	0	0	0	0	0	0	0	0	0	0	0	0
ENSG00000232125	DYTN	0	0.00993025	0	0.0089283	0	0	0.00966253	0.00993025	0	0.0089283	0	0	0	0.00993025	0	0.0089283	0	0
ENSG00000174255	ZNF80	0.0141008	0	0	0	0	0	0	0	0	0	0	0	0	0	0	0	0	0
ENSG00000116473	RAP1A	37.9046	35.3326	42.8337	35.5769	47.7261	45.1937	31.9094	35.3326	50.9152	35.5769	59.7377	45.1937	39.9779	35.3326	50.3969	35.5769	52.5276	45.1937
ENSG00000112996	MRPS30	8.55798	8.65174	3.03775	6.21379	2.83573	7.68769	7.705	8.65174	3.31625	6.21379	3.33267	7.68769	8.36698	8.65174	6.79056	6.21379	7.2364	7.68769
ENSG00000112992	NNT	6.53306	6.23475	3.60479	8.83374	5.09145	10.2349	5.27666	6.23475	3.70814	8.83374	5.87423	10.2349	6.27694	6.23475	7.47024	8.83374	8.85246	10.2349
ENSG00000116478	HDAC1	26.6961	26.5992	35.1428	35.2392	38.6947	31.2672	27.7286	26.5992	35.1248	35.2392	40.679	31.2672	26.0491	26.5992	32.2169	35.2392	26.1179	31.2672
ENSG00000223654	FLOT1	0	0	0	0	0	0	0	0	0	0	0	0	0	0	0	0	0	0
ENSG00000167531	LALBA	0	0	0	0	0	0	0	0	0	0	0	0	0	0	0	0	0	0
ENSG00000099866	MADCAM1	0.187007	0.28729	0.248489	0.281785	0.421717	0.424007	0.211776	0.28729	0.177609	0.281785	0.289879	0.424007	0.227161	0.28729	0.247563	0.281785	0.249245	0.424007
ENSG00000151150	ANK3	0.037919	0.0396984	0.00522517	0.0589709	0.00850274	0.10835	0.0310705	0.0396984	0.00985969	0.0589709	0.00907453	0.10835	0.033778	0.0396984	0.122706	0.0589709	0.085654	0.10835
ENSG00000099864	PALM	1.09814	1.40177	0.634423	1.65969	1.00704	2.43452	1.00713	1.40177	0.515432	1.65969	0.810537	2.43452	0.917079	1.40177	1.01616	1.65969	1.90164	2.43452
ENSG00000099860	GADD45B	7.90957	8.51819	4.27277	5.11176	4.51288	8.44482	9.17831	8.51819	2.99304	5.11176	5.01668	8.44482	8.48306	8.51819	4.14187	5.11176	8.39476	8.44482
ENSG00000021488	SLC7A9	0.00798971	0.0081828	0.0212329	0.0220715	0.0201551	0.0265692	0.00796219	0.0081828	0	0.0220715	0.0501912	0.0265692	0.0266895	0.0081828	0.0357987	0.0220715	0.0156182	0.0265692
ENSG00000269308	AL645608.2	0	0	0	0	0	0	0	0	0	0	0	0	0	0	0	0	0	0
ENSG00000269309	SPANXC	0	0	0	0	0	0	0	0	0	0	0	0	0	0	0	0	0	0
ENSG00000106245	BUD31	24.3919	26.2845	20.1948	25.3577	20.4081	23.6472	24.3861	26.2845	21.2093	25.3577	19.6845	23.6472	23.9678	26.2845	24.5113	25.3577	22.367	23.6472
ENSG00000106244	PDAP1	43.2579	45.3458	52.5465	54.6686	47.8067	44.0659	48.3255	45.3458	49.1695	54.6686	44.9669	44.0659	41.3916	45.3458	48.3577	54.6686	36.3609	44.0659
ENSG00000072210	ALDH3A2	1.40107	1.53695	2.24598	1.24576	3.23985	1.4355	1.17528	1.53695	2.43328	1.24576	3.74034	1.4355	1.43126	1.53695	1.34263	1.24576	1.17152	1.4355
ENSG00000162105	SHANK2	0.00126304	0	0	0.0023261	0.00106207	0.0028001	0.00251739	0	0	0.0023261	0.00226698	0.0028001	0	0	0	0.0023261	0.00493796	0.0028001
ENSG00000266170	AC244230.2	0	0	0	0	0	0	0	0	0	0	0	0	0	0	0	0	0	0
ENSG00000266173	STRADA	4.25056	4.34696	3.72976	4.77024	4.3223	4.54727	4.06353	4.34696	3.32791	4.77024	4.11119	4.54727	4.34773	4.34696	4.93082	4.77024	4.16353	4.54727
ENSG00000269307	CTD-2278I10.6	21.7979	23.3283	31.5075	36.266	38.538	29.5551	19.7527	23.3283	25.7325	36.266	33.4467	29.5551	19.7161	23.3283	33.0823	36.266	26.0434	29.5551
ENSG00000266177	C1orf54	0	0	0	0	0	0	0	0	0	0	0	0	0	0	0	0	0	0
ENSG00000100836	PABPN1	34.0575	35.8455	32.3985	30.883	33.2702	28.5364	34.7297	35.8455	33.3324	30.883	33.3841	28.5364	31.6639	35.8455	28.0155	30.883	26.3758	28.5364
ENSG00000236808	ZNRD1	0	0	0	0	0	0	0	0	0	0	0	0	0	0	0	0	0	0
ENSG00000182242	TEX28P1	0	0	0	0	0.0474443	0.0312713	0	0	0	0	0.0506348	0.0312713	0	0	0.0316007	0	0	0.0312713
ENSG00000153790	C7orf31	1.13561	1.34029	0.191615	1.19011	0.404701	1.38468	1.04009	1.34029	0.311854	1.19011	0.475593	1.38468	1.12601	1.34029	0.757177	1.19011	0.840384	1.38468
ENSG00000228120	AP001631.10	0	0	0	0	0	0	0	0	0	0	0	0	0	0	0	0	0	0
ENSG00000234409	AC006547.14	0.0727024	0.223378	0.463702	0.307954	0.391257	0.435179	0.0869424	0.223378	0.522563	0.307954	0.247931	0.435179	0.0809537	0.223378	0.228026	0.307954	0.440565	0.435179
ENSG00000142765	SYTL1	0.815083	1.28457	0.187928	1.01787	0.278536	3.2592	0.849366	1.28457	0.24263	1.01787	0.250506	3.2592	1.03192	1.28457	0.412734	1.01787	1.05857	3.2592
ENSG00000228128	DDAH2	0	0	0	0	0	0	0	0	0	0	0	0	0	0	0	0	0	0
ENSG00000113643	RARS	16.6916	16.8527	11.9869	13.4545	12.3475	10.7369	15.9753	16.8527	13.7883	13.4545	13.9181	10.7369	19.8084	16.8527	17.0666	13.4545	11.3406	10.7369
ENSG00000113645	WWC1	1.93995	1.85543	0.306874	1.1791	0.222249	0.969949	2.08159	1.85543	0.304543	1.1791	0.195743	0.969949	2.11726	1.85543	1.12101	1.1791	0.684702	0.969949
ENSG00000113649	TCERG1	9.32693	8.43786	4.01193	6.76645	3.85233	5.66423	9.1026	8.43786	5.04691	6.76645	4.81016	5.66423	10.0302	8.43786	7.96704	6.76645	5.283	5.66423
ENSG00000113648	H2AFY	55.2892	51.6598	29.3779	52.5145	28.2685	53.6291	58.327	51.6598	29.8586	52.5145	29.615	53.6291	58.472	51.6598	59.2568	52.5145	44.9219	53.6291
ENSG00000169432	SCN9A	0.00800512	0	0	0.00368568	0	0	0.00797755	0	0	0.00368568	0.001796	0	0	0	0	0.00368568	0.00391208	0
ENSG00000169435	RASSF6	0.00312866	0	0.00554302	0.00864289	0	0.00346804	0	0	0	0.00864289	0	0.00346804	0	0	0	0.00864289	0	0.00346804
ENSG00000169436	COL22A1	0.702242	0.803348	17.3384	0.854061	12.2379	1.04279	0.396127	0.803348	17.9486	0.854061	13.3676	1.04279	0.44556	0.803348	1.98881	0.854061	3.8074	1.04279
ENSG00000169439	SDC2	220.122	210.691	179.264	287.472	167.575	365.903	189.046	210.691	199.848	287.472	185.132	365.903	205.881	210.691	327.769	287.472	488.875	365.903
ENSG00000189030	VHLL	0.14324	0.251488	0.0725074	0.0376855	0.0688269	0.18146	0.183531	0.251488	0.0513071	0.0376855	0.0734554	0.18146	0.159496	0.251488	0.114607	0.0376855	0.200002	0.18146
ENSG00000189037	DUSP21	0	0	0	0	0	0	0	0	0	0	0	0	0	0	0	0	0	0
ENSG00000111644	ACRBP	0.875804	0.971718	0.13577	0.651894	0.319127	0.671475	0.909154	0.971718	0.0731978	0.651894	0.203042	0.671475	0.739529	0.971718	0.441465	0.651894	0.699072	0.671475
ENSG00000111647	UHRF1BP1L	7.26977	6.64567	6.01482	7.26315	5.32712	6.83813	5.99144	6.64567	6.68403	7.26315	6.30736	6.83813	8.28692	6.64567	8.97232	7.26315	7.20352	6.83813
ENSG00000215328	HSPA1A	0	0	0	0	0	0	0	0	0	0	0	0	0	0	0	0	0	0
ENSG00000111641	NOP2	9.26567	9.16316	2.70592	6.14329	2.89243	3.65586	8.80582	9.16316	2.52338	6.14329	2.39963	3.65586	8.45395	9.16316	6.61516	6.14329	3.34037	3.65586
ENSG00000111640	GAPDH	623.343	663.187	569.071	659.854	578.335	635.752	664.922	663.187	504.258	659.854	495.329	635.752	613.461	663.187	559.284	659.854	572.434	635.752
ENSG00000111642	CHD4	25.0329	23.0136	31.6902	40.0921	28.8934	38.9345	26.828	23.0136	30.6556	40.0921	30.4951	38.9345	26.2727	23.0136	32.6649	40.0921	36.1457	38.9345
ENSG00000103569	AQP9	0.102624	0.045983	0.0511362	0.029531	0.0323604	0.0924267	0.108662	0.045983	0.0750495	0.029531	0.10361	0.0924267	0.171407	0.045983	0.0718464	0.029531	0.200608	0.0924267
ENSG00000142494	SLC47A1	0.0145125	0.0371581	0.0321396	0.0334089	0.179998	0.0160867	0.0289251	0.0371581	0.0606462	0.0334089	0.104191	0.0160867	0.0080798	0.0371581	0.00406405	0.0334089	0.0141845	0.0160867
ENSG00000267229	ALG9	0	0	0	0	0	0	0	0	0	0	0	0	0	0	0	0	0	0
ENSG00000267228	IER3IP1	24.6354	23.0276	11.7107	26.583	13.3337	16.4616	22.7179	23.0276	13.3688	26.583	13.5142	16.4616	22.1769	23.0276	22.8148	26.583	18.3811	16.4616
ENSG00000114030	KPNA1	10.6263	9.63336	8.13437	8.88745	7.37669	8.46138	9.65992	9.63336	8.91817	8.88745	8.81801	8.46138	11.3703	9.63336	10.8552	8.88745	9.93013	8.46138
ENSG00000261686	OR9A2	0	0	0	0	0	0	0	0	0	0	0	0	0	0	0	0	0	0
ENSG00000073331	ALPK1	0.984854	0.818994	0.362393	1.18902	0.455833	2.20576	1.07206	0.818994	0.355982	1.18902	0.516703	2.20576	1.13225	0.818994	1.40491	1.18902	2.17035	2.20576
ENSG00000156313	RPGR	1.03993	0.901438	2.20269	0.898754	1.52664	0.882263	1.12899	0.901438	2.67544	0.898754	1.92909	0.882263	1.42319	0.901438	1.33408	0.898754	1.36564	0.882263
ENSG00000039537	C6	0.00437841	0	0	0.00806354	0	0	0.00436333	0	0	0.00806354	0	0	0	0	0	0.00806354	0.0128383	0
ENSG00000262334	RPH3AL	0	0	0	0	0	0	0	0	0	0	0	0	0	0	0	0	0	0
ENSG00000262335	KIR3DL3	0	0	0	0	0	0	0	0	0	0	0	0	0	0	0	0	0	0
ENSG00000262330	AC012616.1	0	0	0	0	0	0	0	0	0	0	0	0	0	0	0	0	0	0
ENSG00000109220	CHIC2	15.129	15.3818	23.1501	14.6271	16.6004	18.777	17.4145	15.3818	26.289	14.6271	18.0699	18.777	14.5321	15.3818	15.1304	14.6271	18.5876	18.777
ENSG00000012048	BRCA1	6.44185	5.8351	1.13686	6.07264	1.22036	3.71479	6.15488	5.8351	1.59005	6.07264	1.4104	3.71479	7.72837	5.8351	5.70529	6.07264	2.79533	3.71479
ENSG00000263687	FAM72A	0	0	0	0	0	0	0	0	0	0	0	0	0	0	0	0	0	0
ENSG00000149716	ORAOV1	7.19227	6.39708	10.053	4.7275	10.0834	5.25556	8.70396	6.39708	11.7095	4.7275	11.1801	5.25556	7.44511	6.39708	5.15742	4.7275	6.09205	5.25556
ENSG00000184254	ALDH1A3	0.244447	0.246673	0.0827957	0.1622	0.163231	0.119543	0.326001	0.246673	0.0931385	0.1622	0.103235	0.119543	0.264185	0.246673	0.136909	0.1622	0.122974	0.119543
ENSG00000138942	RNF185	10.3716	10.314	15.4532	9.79994	16.6884	10.5759	11.4517	10.314	15.1483	9.79994	16.5033	10.5759	10.979	10.314	11.4762	9.79994	12.8789	10.5759
ENSG00000138944	KIAA1644	0.258175	0.289597	0.381172	0.240565	0.250692	0.279366	0.520697	0.289597	0.436691	0.240565	0.212385	0.279366	0.290898	0.289597	0.275424	0.240565	0.321431	0.279366
ENSG00000184258	CDR1	0	0.0654372	0	0	0	0	0	0.0654372	0	0	0	0	0	0.0654372	0	0	0	0
ENSG00000163170	BOLA3	5.10185	5.63589	4.41461	6.92582	6.07018	3.92808	5.39877	5.63589	4.82998	6.92582	5.94147	3.92808	4.75847	5.63589	7.38658	6.92582	3.94552	3.92808
ENSG00000163171	CDC42EP3	16.7907	17.2589	7.2094	19.4638	6.17908	26.8296	18.5789	17.2589	9.24805	19.4638	7.66273	26.8296	20.4808	17.2589	17.6433	19.4638	22.1324	26.8296
ENSG00000187783	TMEM72	0.0131449	0.00673131	0	0.00605212	0.0110533	0.00728541	0.0196495	0.00673131	0.00549312	0.00605212	0	0.00728541	0.0292736	0.00673131	0	0.00605212	0.0192717	0.00728541
ENSG00000008226	DLEC1	1.05762	1.1418	1.11765	1.3222	1.63428	1.34337	0.910141	1.1418	1.11896	1.3222	1.38016	1.34337	0.78695	1.1418	1.35752	1.3222	1.34991	1.34337
ENSG00000187786	SCXB	0	0.245471	3.73072	0.756695	2.85036	0.379538	0.307096	0.245471	2.51828	0.756695	3.25713	0.379538	0.114377	0.245471	0.383537	0.756695	0.568917	0.379538
ENSG00000182368	FAM27A	1.21262	1.34542	0.44758	1.61289	0.311565	0.410715	0.872764	1.34542	0.337827	1.61289	0.574347	0.410715	0.562602	1.34542	0.71689	1.61289	1.6132	0.410715
ENSG00000166529	ZSCAN21	1.84588	1.99937	1.64373	2.32269	2.28355	2.39963	1.43502	1.99937	1.89815	2.32269	2.14223	2.39963	1.90472	1.99937	2.68472	2.32269	2.27645	2.39963
ENSG00000166526	ZNF3	3.72109	4.63046	2.63501	3.96232	2.70084	4.12473	3.73879	4.63046	2.68766	3.96232	2.58357	4.12473	4.05389	4.63046	4.16389	3.96232	4.29177	4.12473
ENSG00000166527	CLEC4D	0	0	0	0.0379663	0	0	0	0	0	0.0379663	0	0	0.022955	0	0	0.0379663	0	0
ENSG00000182362	YBEY	4.54716	4.97458	6.45916	5.06477	7.74377	5.75319	5.73303	4.97458	6.15168	5.06477	7.02793	5.75319	5.30616	4.97458	5.64658	5.06477	5.99316	5.75319
ENSG00000166523	CLEC4E	0.042835	0.00877404	0.0227671	0	0.0288152	0	0.00853749	0.00877404	0.0501208	0	0.030753	0	0.0286179	0.00877404	0.00959633	0	0.02512	0
ENSG00000225890	HLA-DQA1	0	0	0	0	0	0	0	0	0	0	0	0	0	0	0	0	0	0
ENSG00000114698	PLSCR4	0.0785399	0.0502738	0.0130452	0.103963	0.0206383	0.103383	0.0684857	0.0502738	0.0287184	0.103963	0.0352419	0.103383	0.114783	0.0502738	0.0329912	0.103963	0.100753	0.103383
ENSG00000229387	AC103801.2	5.61451	6.54189	1.36954	6.33139	1.88161	6.26864	4.58155	6.54189	1.87019	6.33139	1.78907	6.26864	5.97991	6.54189	4.64846	6.33139	4.3344	6.26864
ENSG00000229381	TRIM10	0	0	0	0	0	0	0	0	0	0	0	0	0	0	0	0	0	0
ENSG00000184788	SATL1	0.730608	0.944685	0.550125	0.706404	0.552918	1.0022	0.564271	0.944685	0.625892	0.706404	0.737625	1.0022	1.02708	0.944685	1.03322	0.706404	1.25859	1.0022
ENSG00000184786	TCTE3	0.782482	0.663222	0.334628	0.422382	0.136132	0.927179	0.67223	0.663222	0.20296	0.422382	0.193716	0.927179	0.691022	0.663222	0.574258	0.422382	0.501072	0.927179
ENSG00000184787	UBE2G2	20.9499	20.6955	12.0583	17.3691	11.4487	17.1438	21.5046	20.6955	12.9638	17.3691	12.5573	17.1438	21.4134	20.6955	18.9683	17.3691	14.9262	17.1438
ENSG00000184785	SMIM10	1.04152	1.52385	0.191715	1.43237	0.363966	0.824642	1.24013	1.52385	0.361758	1.43237	0.50983	0.824642	1.08442	1.52385	0.666664	1.43237	0.661024	0.824642
ENSG00000181552	EDDM3B	0	0	0	0	0	0	0	0	0	0	0	0	0	0	0	0	0	0
ENSG00000181555	SETD2	8.03338	7.69302	3.66365	6.72229	3.91131	7.76615	7.40306	7.69302	4.438	6.72229	5.13892	7.76615	8.82982	7.69302	7.07314	6.72229	7.81737	7.76615
ENSG00000168476	REEP4	16.5555	19.6471	12.8324	29.6211	14.2522	24.1165	16.6718	19.6471	11.2882	29.6211	11.7593	24.1165	14.6925	19.6471	21.1294	29.6211	16.8256	24.1165
ENSG00000168477	TNXB	0.16965	0.232601	0.0375709	0.0755897	0.0345133	0.21535	0.122709	0.232601	0.0308736	0.0755897	0.0798075	0.21535	0.126444	0.232601	0.0597686	0.0755897	0.228664	0.21535
ENSG00000112697	TMEM30A	63.9408	63.4204	36.7541	69.0417	40.181	82.2398	58.8771	63.4204	43.1869	69.0417	52.268	82.2398	67.459	63.4204	75.5341	69.0417	81.6118	82.2398
ENSG00000112695	COX7A2	81.3237	78.9439	164.058	96.4672	146.444	71.9678	82.2056	78.9439	143.534	96.4672	138.368	71.9678	81.8263	78.9439	98.3989	96.4672	74.3889	71.9678
ENSG00000112699	GMDS	0.737602	0.750491	0.222071	0.89673	0.364844	0.806925	0.56691	0.750491	0.2619	0.89673	0.18171	0.806925	0.671009	0.750491	0.869427	0.89673	0.55601	0.806925
ENSG00000182093	WRB	2.2474	2.37054	2.7151	2.51294	2.92259	2.76017	2.01272	2.37054	2.63653	2.51294	3.22968	2.76017	2.28631	2.37054	2.91888	2.51294	3.03583	2.76017
ENSG00000182095	TNRC18	28.0921	33.225	17.5063	35.2313	23.4236	30.596	27.8308	33.225	14.6106	35.2313	17.7648	30.596	25.2268	33.225	22.9558	35.2313	22.3853	30.596
ENSG00000108578	BLMH	8.418	7.77506	4.49647	8.89302	4.38064	9.49728	7.42415	7.77506	4.40147	8.89302	4.52254	9.49728	8.0382	7.77506	9.28422	8.89302	7.82384	9.49728
ENSG00000108576	SLC6A4	0.0326854	0.0365185	0.0184254	0.0437784	0.0349802	0.0296435	0.0473786	0.0365185	0.0372514	0.0437784	0.0239995	0.0296435	0.0860245	0.0365185	0.0632399	0.0437784	0.026138	0.0296435
ENSG00000260240	RP11-105C20.2	0	0	0	0	0	0	0	0	0	0	0	0	0	0	0	0	0	0
ENSG00000260245	ACLY	0	0	0	0	0	0	0	0	0	0	0	0	0	0	0	0	0	0
ENSG00000119514	GALNT12	5.57673	6.38877	1.38636	3.47761	2.15624	4.48761	4.93514	6.38877	1.48609	3.47761	2.14299	4.48761	5.48152	6.38877	2.68307	3.47761	3.46861	4.48761
ENSG00000227761	BAG6	0	0	0	0	0	0	0	0	0	0	0	0	0	0	0	0	0	0
ENSG00000074527	NTN4	0.0647481	0.0408079	0.0132362	0	0	0	0.0843789	0.0408079	0.0166508	0	0.0268184	0	0.049913	0.0408079	0.0334743	0	0.0292082	0
ENSG00000050130	JKAMP	7.97535	8.48075	9.82413	8.32343	10.5047	7.31242	7.28714	8.48075	10.6403	8.32343	12.8591	7.31242	8.72117	8.48075	12.0646	8.32343	9.27762	7.31242
ENSG00000169989	TIGD4	0.125906	0.060176	0.0446132	0.0850211	0.0917553	0.0930422	0.0585537	0.060176	0.049107	0.0850211	0.0451964	0.0930422	0.0186927	0.060176	0.16924	0.0850211	0.270731	0.0930422
ENSG00000154269	ENPP3	0	0.00510099	0	0	0	0	0.0297808	0.00510099	0	0	0.00893948	0	0	0.00510099	0.00557905	0	0.00486803	0
ENSG00000169981	ZNF35	2.01805	2.13066	1.48398	1.38474	1.48727	1.64965	1.94121	2.13066	1.57593	1.38474	1.94391	1.64965	1.90872	2.13066	1.52738	1.38474	2.11712	1.64965
ENSG00000154262	ABCA6	0.102639	0.042048	0.00519557	0.0607586	0.00493184	0.0780158	0.132972	0.042048	0.00490193	0.0607586	0.0052635	0.0780158	0.132248	0.042048	0.141251	0.0607586	0.0945866	0.0780158
ENSG00000154263	ABCA10	0.0172808	0.0151701	0.0131212	0.0113662	0.0166069	0.0383106	0.0196814	0.0151701	0.00412654	0.0113662	0.00443092	0.0383106	0.0412329	0.0151701	0.0027653	0.0113662	0.0168901	0.0383106
ENSG00000154265	ABCA5	0.197072	0.17277	0.0726231	0.19018	0.0742396	0.216701	0.230958	0.17277	0.0737892	0.19018	0.130167	0.216701	0.279125	0.17277	0.162472	0.19018	0.203403	0.216701
ENSG00000187258	NPSR1	0	0	0	0.0142906	0	0.00860136	0.00773291	0	0	0.0142906	0	0.00860136	0	0	0	0.0142906	0	0.00860136
ENSG00000180209	MYLPF	0.259598	0.132936	0.52563	0.307344	0.639279	0.431636	0.129352	0.132936	0.96085	0.307344	0.765472	0.431636	0.14453	0.132936	0.228477	0.307344	0.289976	0.431636
ENSG00000164961	KIAA0196	14.6251	14.33	12.5714	12.341	13.2498	13.2067	12.4352	14.33	13.4232	12.341	15.8924	13.2067	14.8796	14.33	14.5507	12.341	14.6167	13.2067
ENSG00000180205	WFDC9	0	0	0	0	0	0	0	0	0	0	0	0	0	0	0	0	0	0
ENSG00000242875	RBMY1B	0	0.0221247	0	0	0	0.107757	0	0.0221247	0	0	0	0.107757	0	0.0221247	0	0	0.0105571	0.107757
ENSG00000164967	RPP25L	18.5831	24.092	13.1627	20.5763	16.0576	22.4313	22.5524	24.092	12.2758	20.5763	11.4931	22.4313	20.9249	24.092	19.6453	20.5763	19.4074	22.4313
ENSG00000165383	LRRC18	0.244246	0.0714711	1.23637	0.149939	0.606364	0.141816	0.347721	0.0714711	1.38034	0.149939	0.720204	0.141816	0.349671	0.0714711	0.260564	0.149939	0.318299	0.141816
ENSG00000103037	SETD6	4.90591	4.56334	2.25188	3.22186	2.73704	3.80041	5.02923	4.56334	2.35588	3.22186	2.87901	3.80041	5.37914	4.56334	3.90349	3.22186	3.52062	3.80041
ENSG00000165389	SPTSSA	8.1966	8.23399	5.25539	9.01318	5.25879	7.08139	8.07901	8.23399	6.65695	9.01318	6.92669	7.08139	9.38478	8.23399	9.32371	9.01318	7.15687	7.08139
ENSG00000165388	ZNF488	0.158819	0.22485	0.0248275	0.163451	0.0157115	0.0414228	0.139652	0.22485	0.0234243	0.163451	0	0.0414228	0.187247	0.22485	0.0680212	0.163451	0.0182622	0.0414228
ENSG00000183574	RNF5	0	0	0	0	0	0	0	0	0	0	0	0	0	0	0	0	0	0
ENSG00000183576	SETD3	13.1115	13.2068	10.2517	12.6971	9.86273	10.1186	12.2557	13.2068	11.2095	12.6971	11.5545	10.1186	14.3988	13.2068	14.6645	12.6971	9.77586	10.1186
ENSG00000101680	LAMA1	0.00130729	0	0.00115805	0.00120379	0	0.00289819	0.00390836	0	0	0.00120379	0.00117319	0.00289819	0	0	0	0.00120379	0.00511094	0.00289819
ENSG00000183571	PGPEP1L	0	0	0	0	0	0	0	0	0	0	0	0	0	0	0	0	0	0
ENSG00000183578	TNFAIP8L3	25.4367	25.9669	113.079	22.3079	121.462	17.1128	12.6151	25.9669	123.347	22.3079	134.133	17.1128	15.8624	25.9669	35.2334	22.3079	31.7114	17.1128
ENSG00000165688	PMPCA	20.8132	20.6574	19.1416	20.7254	17.7601	14.5007	21.506	20.6574	16.7206	20.7254	16.0965	14.5007	18.1746	20.6574	18.1758	20.7254	13.3483	14.5007
ENSG00000250021	C15orf38-AP3S2	8.94244	8.96776	11.6211	9.44248	13.4202	8.63039	8.63316	8.96776	10.7956	9.44248	12.6647	8.63039	8.24594	8.96776	8.43436	9.44248	8.26231	8.63039
ENSG00000116863	ADPRHL2	15.5993	16.0782	16.1988	15.2348	16.4434	12.3549	16.9712	16.0782	14.8258	15.2348	13.8429	12.3549	15.5829	16.0782	14.1711	15.2348	11.514	12.3549
ENSG00000255767	RP13-512J5.1	9.75856	12.064	6.63624	10.166	7.41835	8.905	9.72495	12.064	7.90884	10.166	8.44798	8.905	9.00021	12.064	8.55715	10.166	9.39345	8.905
ENSG00000006756	ARSD	7.34046	7.17628	4.82132	6.77563	6.22208	7.07995	7.15929	7.17628	5.07426	6.77563	5.73726	7.07995	6.41856	7.17628	5.51798	6.77563	5.69462	7.07995
ENSG00000006757	PNPLA4	2.21301	2.30355	0.924106	1.53808	1.17636	1.96513	2.24746	2.30355	0.8114	1.53808	1.16888	1.96513	1.80617	2.30355	1.19555	1.53808	1.3084	1.96513
ENSG00000154889	MPPE1	4.13898	4.59272	1.41408	3.31548	3.02532	3.94588	3.44449	4.59272	1.23188	3.31548	2.83341	3.94588	3.85473	4.59272	2.17192	3.31548	3.04602	3.94588
ENSG00000164385	C6orf195	0.034099	0	0	0.0235496	0.0143366	0.00944948	0.0169908	0	0	0.0235496	0	0.00944948	0	0	0	0.0235496	0	0.00944948
ENSG00000159459	UBR1	2.37212	1.77874	1.94767	2.32289	2.03509	2.4997	2.0432	1.77874	2.27428	2.32289	2.759	2.4997	2.52964	1.77874	3.57016	2.32289	3.02937	2.4997
ENSG00000165684	SNAPC4	6.48984	7.13872	4.87949	6.52521	4.56215	4.12256	8.56003	7.13872	4.44102	6.52521	4.2594	4.12256	7.23562	7.13872	6.38816	6.52521	3.82531	4.12256
ENSG00000155130	MARCKS	6.70114	3.83438	15.6276	1.65891	12.1109	1.74936	19.7245	3.83438	17.4311	1.65891	13.5223	1.74936	17.7512	3.83438	5.72219	1.65891	3.34602	1.74936
ENSG00000159450	TCHH	0.180428	0.295662	0.210445	0.224294	0.359067	0.396667	0.209775	0.295662	0.221171	0.224294	0.466873	0.396667	0.174118	0.295662	0.141475	0.224294	0.28216	0.396667
ENSG00000100483	VCPKMT	4.05898	3.5056	1.52054	2.53824	1.55373	2.29441	3.14947	3.5056	2.05063	2.53824	1.8485	2.29441	4.20485	3.5056	3.66448	2.53824	2.50665	2.29441
ENSG00000165685	TMEM52B	0.416294	0.615169	0.57423	0.739291	0.680102	1.03497	0.551171	0.615169	0.616332	0.739291	0.789882	1.03497	0.536383	0.615169	1.01922	0.739291	1.15671	1.03497
ENSG00000100485	SOS2	4.61461	3.91647	3.49097	4.92761	3.54543	7.11013	3.70046	3.91647	4.3123	4.92761	5.02273	7.11013	5.08832	3.91647	5.12881	4.92761	7.32301	7.11013
ENSG00000159455	LCE2B	0	0	0	0	0.0540174	0	0	0	0	0	0	0	0	0	0	0	0	0
ENSG00000177042	TMEM80	2.52294	2.48473	3.22372	2.92864	3.34295	3.19774	2.62599	2.48473	2.84983	2.92864	2.95483	3.19774	2.29283	2.48473	2.5349	2.92864	2.75982	3.19774
ENSG00000107651	SEC23IP	13.0833	12.6779	8.80227	9.71463	8.2603	8.9467	12.3943	12.6779	10.1049	9.71463	9.79532	8.9467	12.5967	12.6779	11.474	9.71463	8.92344	8.9467
ENSG00000006282	SPATA20	7.10396	7.93707	12.2526	7.1946	15.8918	9.61811	6.79916	7.93707	9.62954	7.1946	13.7426	9.61811	6.9264	7.93707	7.35393	7.1946	10.8972	9.61811
ENSG00000006283	CACNA1G	0.100444	0.0547192	2.19985	0.051166	2.00012	0.0426409	0.125656	0.0547192	2.07194	0.051166	1.78557	0.0426409	0.114224	0.0547192	0.102937	0.051166	0.0835523	0.0426409
ENSG00000217442	SYCE3	0.131048	0.26843	0.309569	0.160897	0.440782	0.193684	0.130597	0.26843	0.36509	0.160897	0.0784039	0.193684	0.194562	0.26843	0.293587	0.160897	0.341562	0.193684
ENSG00000174004	NRROS	113.921	124.598	45.7179	117.469	49.405	120.43	115.44	124.598	37.7705	117.469	42.489	120.43	109.884	124.598	94.5347	117.469	96.6412	120.43
ENSG00000198718	FAM179B	2.05392	2.13666	1.6656	1.69047	1.85447	2.03942	1.88383	2.13666	1.99513	1.69047	2.43953	2.03942	2.54789	2.13666	2.15592	1.69047	2.04697	2.03942
ENSG00000164037	SLC9B1	1.08033	0.956533	0.327233	0.969127	0.468865	0.842124	0.986311	0.956533	0.372816	0.969127	0.49414	0.842124	1.05548	0.956533	0.897839	0.969127	0.892411	0.842124
ENSG00000164035	EMCN	0.0118726	0.00405316	0.00350575	0.0145768	0	0.00877361	0.00788778	0.00405316	0.00330761	0.0145768	0	0.00877361	0.00440667	0.00405316	0	0.0145768	0.0154722	0.00877361
ENSG00000164032	H2AFZ	130.397	145.304	65.8127	186.677	59.275	167.082	134.141	145.304	68.6217	186.677	63.3015	167.082	132.194	145.304	170.134	186.677	148.443	167.082
ENSG00000164031	DNAJB14	3.60629	3.40746	1.97608	2.83136	2.43744	3.84272	2.99463	3.40746	2.71968	2.83136	3.12817	3.84272	4.19932	3.40746	4.36482	2.83136	4.96228	3.84272
ENSG00000198711	SSBP3-AS1	0.767743	0.558685	0.501127	0.353481	0.271823	0.940605	0.946307	0.558685	0.675435	0.353481	0.725256	0.940605	0.877374	0.558685	0.678938	0.353481	1.0071	0.940605
ENSG00000198712	MT-CO2	3908.11	3728.48	3033.99	4855.44	3899.19	3498.66	4010.89	3728.48	3435.35	4855.44	3550.64	3498.66	3919.03	3728.48	4685.98	4855.44	3551.29	3498.66
ENSG00000198715	C1orf85	14.9956	17.3288	23.7113	22.8283	40.5344	24.6908	14.0909	17.3288	20.6714	22.8283	34.302	24.6908	13.1645	17.3288	17.028	22.8283	22.1296	24.6908
ENSG00000164038	SLC9B2	2.43194	2.59174	0.984737	1.78174	0.832663	1.92613	2.16268	2.59174	0.903714	1.78174	0.803536	1.92613	2.1841	2.59174	1.67018	1.78174	1.53891	1.92613
ENSG00000164039	BDH2	0.717607	0.747513	0.157564	1.12956	0.340391	1.45492	0.709023	0.747513	0.189668	1.12956	0.37429	1.45492	0.669291	0.747513	0.996198	1.12956	1.62458	1.45492
ENSG00000100151	PICK1	2.89094	2.95595	4.1757	3.57128	4.99758	3.39923	2.31803	2.95595	3.32474	3.57128	4.23881	3.39923	2.16189	2.95595	3.34464	3.57128	3.61898	3.39923
ENSG00000100150	DEPDC5	1.90409	1.83874	1.34425	2.16943	1.40808	1.61244	1.89512	1.83874	1.5086	2.16943	1.60686	1.61244	1.70584	1.83874	2.00295	2.16943	1.35564	1.61244
ENSG00000100156	SLC16A8	0.273141	0.299034	0.0500607	0.225497	0.166319	0.814345	0.337903	0.299034	0.0551033	0.225497	0.160598	0.814345	0.450967	0.299034	0.274308	0.225497	0.81931	0.814345
ENSG00000120063	GNA13	19.2858	16.6625	25.8388	16.254	26.7047	25.0954	16.3753	16.6625	30.3413	16.254	32.5757	25.0954	21.0672	16.6625	22.3634	16.254	38.8519	25.0954
ENSG00000100154	TTC28	2.00254	1.86265	2.17817	2.13118	1.58728	2.64188	1.94166	1.86265	2.18676	2.13118	1.5747	2.64188	1.93738	1.86265	2.2027	2.13118	2.73216	2.64188
ENSG00000120068	HOXB8	0	0	0	0	0	0	0	0	0	0	0	0	0	0	0	0	0.0192048	0
ENSG00000243452	NBPF15	9.49867	8.68292	7.06681	5.94514	6.49107	9.4757	10.6663	8.68292	7.54005	5.94514	7.76633	9.4757	11.3126	8.68292	7.67881	5.94514	11.3211	9.4757
ENSG00000230778	ANKRD63	1.48857	2.08231	1.81716	1.88892	1.74018	1.93176	0.615088	2.08231	1.59308	1.88892	1.58025	1.93176	0.707477	2.08231	1.03706	1.88892	1.20652	1.93176
ENSG00000125743	SNRPD2	48.3504	52.9815	43.0025	59.0664	39.3765	39.9497	53.3019	52.9815	41.4348	59.0664	33.7794	39.9497	46.4239	52.9815	54.6223	59.0664	38.265	39.9497
ENSG00000125741	OPA3	5.7419	5.41098	6.20225	4.4389	5.50528	3.31234	6.56793	5.41098	6.0685	4.4389	5.22183	3.31234	5.74196	5.41098	3.84002	4.4389	3.018	3.31234
ENSG00000125740	FOSB	0.0822049	0.0535765	2.18793	0.0963414	0.769795	0.144967	0.104264	0.0535765	1.9862	0.0963414	0.838328	0.144967	0.116499	0.0535765	0.104639	0.0963414	0.146085	0.144967
ENSG00000125746	EML2	2.71476	3.18348	3.3525	3.10621	3.23324	4.69006	2.60987	3.18348	2.66537	3.10621	2.86197	4.69006	2.91893	3.18348	2.65659	3.10621	4.19217	4.69006
ENSG00000125744	RTN2	3.9794	3.20271	13.8564	7.05137	11.8814	8.41014	3.71025	3.20271	11.2416	7.05137	10.9322	8.41014	3.48204	3.20271	4.98152	7.05137	7.94799	8.41014
ENSG00000203544	BX248133.1	0	0	0	0	0	0	0	0	0	0	0	0	0	0	0	0	0	0
ENSG00000203546	RP11-176H8.1	1.91914	1.86461	1.96609	1.40426	1.80316	1.25871	2.05749	1.86461	2.04713	1.40426	2.13918	1.25871	1.55177	1.86461	1.87116	1.40426	1.57307	1.25871
ENSG00000167608	TMC4	0.173654	0.158623	0.0914666	0.155584	0.126289	0.156073	0.079512	0.158623	0.0509937	0.155584	0.0673909	0.156073	0.135876	0.158623	0.126174	0.155584	0.105507	0.156073
ENSG00000124299	PEPD	6.62359	6.5843	12.2523	6.30604	15.391	5.33919	6.74006	6.5843	10.5336	6.30604	14.6387	5.33919	5.9136	6.5843	6.45216	6.30604	6.35678	5.33919
ENSG00000167600	CYP2S1	5.96343	6.21847	6.44026	9.8325	9.1427	12.4203	4.91404	6.21847	5.89524	9.8325	7.04278	12.4203	4.49382	6.21847	6.90638	9.8325	12.1724	12.4203
ENSG00000167601	AXL	0.253629	0.239143	0.0820246	0.140871	0.0541642	0.312379	0.357067	0.239143	0.111036	0.140871	0.184258	0.312379	0.188276	0.239143	0.491543	0.140871	0.338397	0.312379
ENSG00000167604	NFKBID	3.06892	2.53175	3.16115	2.19863	2.5915	2.34459	3.75666	2.53175	3.09094	2.19863	2.78906	2.34459	3.7351	2.53175	3.1106	2.19863	3.33565	2.34459
ENSG00000256073	C21orf119	2.05967	2.55217	2.36516	2.73954	3.33558	3.72059	1.77383	2.55217	2.63527	2.73954	3.42297	3.72059	1.4157	2.55217	2.44956	2.73954	3.62857	3.72059
ENSG00000243989	ACY1	8.57394	9.20978	6.57566	10.6384	8.27929	9.974	8.69258	9.20978	5.69775	10.6384	6.8939	9.974	7.85469	9.20978	9.51775	10.6384	9.87638	9.974
ENSG00000042832	TG	0.547995	0.444792	0.217952	0.216262	0.266448	0.429753	0.523818	0.444792	0.275736	0.216262	0.339566	0.429753	0.477359	0.444792	0.240107	0.216262	0.466379	0.429753
ENSG00000096717	SIRT1	5.85411	5.75278	5.02832	4.52999	5.07979	5.29642	6.03841	5.75278	5.59769	4.52999	6.46884	5.29642	7.34602	5.75278	6.09785	4.52999	5.32963	5.29642
ENSG00000046647	GEMIN8	4.50252	4.4886	2.69188	3.92536	2.80717	3.57715	4.27375	4.4886	2.86168	3.92536	3.16494	3.57715	4.91822	4.4886	3.47101	3.92536	3.30474	3.57715
ENSG00000177335	C8orf31	0.0212522	0.050787	0	0.0260929	0.0238274	0.0471151	0.0494178	0.050787	0.0118414	0.0260929	0.0190723	0.0471151	0.0788808	0.050787	0.0793524	0.0260929	0.0484676	0.0471151
ENSG00000240184	PCDHGC3	82.4817	94.9855	79.4843	85.1704	86.1086	105.06	71.7293	94.9855	75.1171	85.1704	76.6221	105.06	70.1904	94.9855	64.517	85.1704	92.5675	105.06
ENSG00000188004	C1orf204	25.9511	16.365	47.4986	9.96963	40.9018	9.84927	32.013	16.365	43.4619	9.96963	37.093	9.84927	28.6562	16.365	26.021	9.96963	21.8047	9.84927
ENSG00000166959	MS4A8	0	0	0	0	0	0	0	0	0	0	0	0	0.00894471	0	0	0	0	0
ENSG00000127241	MASP1	0	0.00345765	0.00149533	0.00777195	0	0.0149691	0.00336443	0.00345765	0.00423246	0.00777195	0.00302976	0.0149691	0.00187961	0.00345765	0	0.00777195	0.00659949	0.0149691
ENSG00000127249	ATP13A4	0	0.00353413	0	0.00635508	0	0.0267754	0.0171942	0.00353413	0	0.00635508	0	0.0267754	0.00384237	0.00353413	0.00386535	0.00635508	0	0.0267754
ENSG00000185737	NRG3	0.0081835	0.00419064	0	0.00753562	0.00688134	0.0090712	0.00815532	0.00419064	0	0.00753562	0	0.0090712	0	0.00419064	0.00916676	0.00753562	0	0.0090712
ENSG00000136425	CIB2	0.125695	0.35649	0.488209	0.195873	0.577251	0.117894	0.38542	0.35649	0.452535	0.195873	0.694163	0.117894	0.258388	0.35649	0.129966	0.195873	0.160654	0.117894
ENSG00000196235	SUPT5H	18.2971	18.524	24.9242	19.706	26.1789	17.9653	19.3146	18.524	22.7766	19.706	23.7223	17.9653	16.312	18.524	16.3726	19.706	16.4302	17.9653
ENSG00000158195	WASF2	69.3742	69.9219	59.4792	79.8928	62.7696	87.1452	73.9379	69.9219	57.8896	79.8928	56.4642	87.1452	70.4217	69.9219	67.3478	79.8928	84.6035	87.1452
ENSG00000060642	PIGV	4.22102	3.61929	3.34243	3.62697	3.87954	3.73359	5.18474	3.61929	3.28684	3.62697	3.81558	3.73359	4.87087	3.61929	2.68709	3.62697	3.07621	3.73359
ENSG00000128652	HOXD3	0.00747183	0	0	0	0	0	0	0	0	0	0	0	0	0	0	0	0	0
ENSG00000128656	CHN1	0.0876553	0.072674	0.0591612	0.0576541	0.0491384	0.0832831	0.0374372	0.072674	0.0976806	0.0576541	0.0786642	0.0832831	0.0790125	0.072674	0.0654582	0.0576541	0.069355	0.0832831
ENSG00000128654	MTX2	7.40786	8.81219	4.29274	6.39853	5.23327	6.60397	7.62321	8.81219	4.19152	6.39853	4.60914	6.60397	8.26207	8.81219	8.21671	6.39853	7.68924	6.60397
ENSG00000128655	PDE11A	0	0	0.00147069	0.00611508	0.00558413	0.0128821	0.00165449	0	0	0.00611508	0.00297983	0.0128821	0	0	0	0.00611508	0.00162268	0.0128821
ENSG00000173542	MOB1B	6.34903	6.24652	5.00398	5.51639	4.50613	8.03603	5.38737	6.24652	6.61672	5.51639	7.12805	8.03603	7.23236	6.24652	8.11804	5.51639	10.3325	8.03603
ENSG00000122035	RASL11A	1.35432	0.955236	0.882814	1.83536	0.870233	0.566503	0.91675	0.955236	0.576636	1.83536	0.756762	0.566503	0.896283	0.955236	0.858706	1.83536	0.586928	0.566503
ENSG00000173540	GMPPB	8.65732	8.79091	5.85879	7.93225	5.82795	4.98072	8.14599	8.79091	5.50194	7.93225	5.15652	4.98072	7.76536	8.79091	6.61899	7.93225	4.53011	4.98072
ENSG00000157214	STEAP2	0.0333322	0.065837	0.202472	0.346395	0.294297	0.219048	0.0260994	0.065837	0.304451	0.346395	0.420921	0.219048	0.0530217	0.065837	0.26936	0.346395	0.272265	0.219048
ENSG00000233450	KIFC1	0	0	0	0	0	0	0	0	0	0	0	0	0	0	0	0	0	0
ENSG00000204099	NEU4	0.0129198	0.00882139	0.0534099	0	0.010864	0.0190951	0	0.00882139	0.0827856	0	0.0270541	0.0190951	0.0191816	0.00882139	0	0	0	0.0190951
ENSG00000122033	MTIF3	10.4007	11.4263	8.74004	10.2734	10.1157	10.951	10.2869	11.4263	10.4029	10.2734	11.5562	10.951	10.333	11.4263	13.4461	10.2734	12.2548	10.951
ENSG00000067141	NEO1	0.549599	0.539319	1.00542	0.597889	1.48317	0.858569	0.588465	0.539319	1.06397	0.597889	1.76414	0.858569	0.580664	0.539319	0.529731	0.597889	0.864477	0.858569
ENSG00000173548	SNX33	3.03414	3.35426	4.30595	5.7668	5.30096	6.51974	2.67768	3.35426	3.79189	5.7668	5.06449	6.51974	2.82455	3.35426	3.93274	5.7668	6.22741	6.51974
ENSG00000174010	KLHL15	4.05921	4.01839	2.2712	2.79043	1.89721	3.30405	4.36502	4.01839	2.63777	2.79043	2.5206	3.30405	4.56042	4.01839	3.1721	2.79043	3.40159	3.30405
ENSG00000232326	TAP2	0	0	0	0	0	0	0	0	0	0	0	0	0	0	0	0	0	0
ENSG00000174015	SPERT	0	0	0	0	0	0	0	0	0.0333817	0	0	0	0	0	0	0	0	0
ENSG00000158445	KCNB1	0.012257	0.00358662	0	0	0.00294475	0.00388186	0.00348992	0.00358662	0.00585377	0	0	0.00388186	0.00779888	0.00358662	0	0	0	0.00388186
ENSG00000174016	FAM46D	0.0259042	0	0	0	0	0.0143571	0.025815	0	0	0	0	0.0143571	0	0	0	0	0.0126593	0.0143571
ENSG00000044090	CUL7	3.79371	3.75702	6.32937	4.06371	6.3522	5.10839	4.3538	3.75702	5.58647	4.06371	6.08456	5.10839	3.89175	3.75702	4.81944	4.06371	6.13668	5.10839
ENSG00000268076	AC087239.1	0	0	0	0	0	0	0	0	0	0	0.503269	0	0	0	0	0	0	0
ENSG00000204323	SMIM5	0.0567695	0.0581415	0.0107762	0.0896145	0.0716045	0.12136	0.165681	0.0581415	0.0203343	0.0896145	0.0545855	0.12136	0.144486	0.0581415	0.0681327	0.0896145	0.0990826	0.12136
ENSG00000111412	C12orf49	12.3709	12.2603	18.2125	12.0781	17.7098	12.3904	12.8012	12.2603	17.2965	12.0781	18.4689	12.3904	13.541	12.2603	14.5635	12.0781	12.6014	12.3904
ENSG00000163705	FANCD2OS	0.875958	0.807416	0.193991	0.967931	0.156522	0.910291	0.763824	0.807416	0.173875	0.967931	0.176874	0.910291	1.21922	0.807416	0.907616	0.967931	0.556502	0.910291
ENSG00000272946	TMC4	0	0	0	0	0	0	0	0	0	0	0	0	0	0	0	0	0	0
ENSG00000206256	PPT2	0	0	0	0	0	0	0	0	0	0	0	0	0	0	0	0	0	0
ENSG00000272943	RPS9	0	0	0	0	0	0	0	0	0	0	0	0	0	0	0	0	0	0
ENSG00000206258	TNXB	0	0	0	0	0	0	0	0	0	0	0	0	0	0	0	0	0	0
ENSG00000130283	GDF1	0.93413	1.15143	1.39136	1.17227	0.973175	1.19124	0.716721	1.15143	0.773817	1.17227	0.838313	1.19124	1.02174	1.15143	0.759311	1.17227	0.484786	1.19124
ENSG00000087111	PIGS	13.5476	13.6799	12.2834	19.081	13.1134	16.6299	13.5942	13.6799	11.0304	19.081	11.7197	16.6299	12.1885	13.6799	13.4759	19.081	15.7299	16.6299
ENSG00000154743	TSEN2	2.40921	2.49369	0.635716	1.76669	0.658866	1.65996	2.37902	2.49369	0.804816	1.76669	0.785319	1.65996	2.58888	2.49369	2.35007	1.76669	1.48514	1.65996
ENSG00000269670	LANCL3	0	0	0	0	0	0	0	0	0	0	0	0	0	0	0	0	0	0
ENSG00000269671	RABL2B	0	0	0	0	0	0	0	0	0	0	0	0	0	0	0	0	0	0
ENSG00000269676	MUC8	0.358132	0.366787	0.0991404	0.371001	0.0752864	1.01726	0.200755	0.366787	0.0561223	0.371001	0	1.01726	0.149542	0.366787	0.200581	0.371001	0.918845	1.01726
ENSG00000159714	ZDHHC1	1.43164	1.73342	0.980752	1.55852	1.14498	2.44036	1.58523	1.73342	0.845552	1.55852	1.05068	2.44036	1.37449	1.73342	0.969321	1.55852	1.69779	2.44036
ENSG00000159713	TPPP3	0.0237769	0.0162343	0	0.0218944	0	0	0.0157966	0.0162343	0.0132481	0.0218944	0.0142253	0	0	0.0162343	0	0.0218944	0	0
ENSG00000234243	GPSM3	0	0	0	0	0	0	0	0	0	0	0	0	0	0	0	0	0	0
ENSG00000170222	ADPRM	1.13993	1.29866	1.16865	1.49786	1.16318	1.37716	1.6338	1.29866	0.931318	1.49786	1.44829	1.37716	1.2693	1.29866	1.30559	1.49786	1.61491	1.37716
ENSG00000121073	SLC35B1	10.9824	11.2803	7.7655	13.2438	7.59945	8.01427	11.4011	11.2803	7.45617	13.2438	7.09233	8.01427	10.9813	11.2803	12.6296	13.2438	8.68513	8.01427
ENSG00000231145	AC013468.1	0	0	0.38293	0.398053	0	0	0	0	0.361287	0.398053	0	0	0.481337	0	0	0.398053	0	0
ENSG00000171570	RAB4B-EGLN2	26.704	27.5628	43.7898	36.5084	41.722	29.2986	29.5032	27.5628	38.3006	36.5084	36.386	29.2986	24.9425	27.5628	29.6073	36.5084	30.6357	29.2986
ENSG00000120306	CYSTM1	11.596	10.64	25.9922	7.5446	39.7787	12.4324	10.2016	10.64	26.3582	7.5446	36.6704	12.4324	10.7001	10.64	10.2637	7.5446	18.5894	12.4324
ENSG00000171574	ZNF584	3.51996	4.04776	3.68011	3.26714	3.54523	2.50785	3.41833	4.04776	3.92724	3.26714	3.46623	2.50785	3.53189	4.04776	3.7731	3.26714	2.43077	2.50785
ENSG00000111405	ENDOU	0.0309806	0.0634587	0.00686101	0.00713197	0.0521019	0.0600971	0.0540294	0.0634587	0.0194197	0.00713197	0.0208521	0.0600971	0.0258725	0.0634587	0.00867574	0.00713197	0.0227102	0.0600971
ENSG00000111404	RERGL	0.0803716	0.054876	0.0118661	0.0740086	0	0.326663	0.0667457	0.054876	0	0.0740086	0.0120213	0.326663	0.0894933	0.054876	0.150047	0.0740086	0.235664	0.326663
ENSG00000135502	SLC26A10	1.43634	1.17287	2.24385	1.34497	2.64816	1.51146	1.67802	1.17287	1.90614	1.34497	2.32108	1.51146	1.63718	1.17287	1.09798	1.34497	1.30427	1.51146
ENSG00000135503	ACVR1B	7.37346	6.94664	9.01265	6.18529	8.49384	6.45537	7.13366	6.94664	8.45755	6.18529	8.77377	6.45537	7.02059	6.94664	6.00461	6.18529	6.04486	6.45537
ENSG00000087128	TMPRSS11E	0	0	0	0.0178733	0	0	0	0	0	0.0178733	0	0	0	0	0.0108711	0.0178733	0	0
ENSG00000135506	OS9	56.2426	57.3059	69.6288	59.6927	78.0806	69.1914	57.125	57.3059	62.8686	59.6927	74.4873	69.1914	51.6481	57.3059	53.3777	59.6927	61.1231	69.1914
ENSG00000230891	LINC00692	0	0	0	0	0	0	0	0	0	0	0	0	0	0	0	0	0	0
ENSG00000041802	LSG1	14.3496	13.8893	9.86557	9.93002	9.04249	7.21317	14.6951	13.8893	11.0537	9.93002	10.2883	7.21317	15.2925	13.8893	9.84108	9.93002	6.70956	7.21317
ENSG00000273398	RP11-474G23.1	11.7693	11.3626	7.42877	8.49272	6.59015	7.4007	11.2535	11.3626	7.43757	8.49272	7.76814	7.4007	11.0211	11.3626	8.16404	8.49272	7.35224	7.4007
ENSG00000273392	PCDHB6	0	0	0	0	0	0	0	0	0	0	0	0	0	0	0	0	0	0
ENSG00000174903	RAB1B	96.3647	101.944	200.053	138.83	179.179	116.226	101.39	101.944	166.609	138.83	154.664	116.226	90.6439	101.944	114.88	138.83	116.376	116.226
ENSG00000273397	NDUFA6	0	0	0	0	0	0	0	0	0	0	0	0	0	0	0	0	0	0
ENSG00000273395	FLJ00388	0	0	0	0	0	0	0	0	0	0	0	0	0	0	0	0	0	0
ENSG00000102763	VWA8	2.64497	2.6031	0.977668	2.50065	1.30063	3.05843	2.09677	2.6031	1.18141	2.50065	1.55398	3.05843	2.89067	2.6031	2.71003	2.50065	3.08999	3.05843
ENSG00000102760	RGCC	61.7452	59.9015	297.029	83.6838	171.23	166.193	39.3519	59.9015	264.647	83.6838	194.437	166.193	52.1859	59.9015	143.778	83.6838	288.836	166.193
ENSG00000198457	CYP21A2	0	0	0	0	0	0	0	0	0	0	0	0	0	0	0	0	0	0
ENSG00000198455	ZXDB	2.35904	2.54798	1.55182	1.51822	1.55042	2.07645	2.3986	2.54798	1.61791	1.51822	2.01138	2.07645	2.65137	2.54798	1.88396	1.51822	1.84889	2.07645
ENSG00000198454	C9orf141	0	0	0	0	0	0	0	0	0	0	0	0	0	0	0	0	0.0207364	0
ENSG00000198453	ZNF568	0.055646	0.0478723	0.0354915	0.0450916	0.0243316	0.111028	0.0465816	0.0478723	0.0204634	0.0450916	0.0459431	0.111028	0.0718753	0.0478723	0.0897579	0.0450916	0.215377	0.111028
ENSG00000109790	KLHL5	10.7377	8.11775	12.86	9.12984	13.8387	13.5702	12.6985	8.11775	15.8652	9.12984	17.2598	13.5702	15.1722	8.11775	16.9121	9.12984	22.3264	13.5702
ENSG00000147488	ST18	0.0389157	0.0295231	0.0612858	0.00530885	0.0581749	0.00958601	0.0330362	0.0295231	0.0722775	0.00530885	0.0814892	0.00958601	0.0320981	0.0295231	0.0274465	0.00530885	0.0408535	0.00958601
ENSG00000109794	FAM149A	0	0.00407258	0	0.00732333	0.00334374	0.0132235	0.00396278	0.00407258	0	0.00732333	0.0035686	0.0132235	0	0.00407258	0	0.00732333	0.00388659	0.0132235
ENSG00000147485	PXDNL	0.00792259	0.0121711	0.00701819	0.010943	0.0199858	0.021955	0.0236859	0.0121711	0.0099323	0.010943	0.0142199	0.021955	0.0220544	0.0121711	0.0221863	0.010943	0.0348457	0.021955
ENSG00000147481	SNTG1	0	0.0041791	0.00361468	0.0187872	0.0240184	0.00452311	0.0162657	0.0041791	0.0238727	0.0187872	0.0439432	0.00452311	0.0045436	0.0041791	0.0319953	0.0187872	0.0239295	0.00452311
ENSG00000259384	GH1	0.0352579	0	0	0	0	0	0.0351365	0	0	0	0	0	0	0	0	0	0.0689217	0
ENSG00000068885	IFT80	1.712	1.65563	0.476488	2.15698	0.474186	1.79833	1.65134	1.65563	0.5269	2.15698	0.581337	1.79833	1.858	1.65563	2.44571	2.15698	1.5885	1.79833
ENSG00000230230	TRIM26	0	0	0	0	0	0	0	0	0	0	0	0	0	0	0	0	0	0
ENSG00000136856	SLC2A8	0.507627	0.368259	0.651098	0.80341	0.506888	0.609583	0.500609	0.368259	0.393328	0.80341	0.564702	0.609583	0.447482	0.368259	0.663389	0.80341	0.599517	0.609583
ENSG00000136854	STXBP1	2.88351	2.76479	7.60617	3.55737	7.60501	2.95444	2.56661	2.76479	7.19774	3.55737	6.83024	2.95444	2.72486	2.76479	3.87212	3.55737	3.03994	2.95444
ENSG00000132570	PCBD2	1.38888	1.35429	1.03553	1.10573	1.29197	1.19956	1.34373	1.35429	1.19465	1.10573	1.19448	1.19956	1.59806	1.35429	0.991793	1.10573	1.06336	1.19956
ENSG00000136859	ANGPTL2	0.0106707	0.125679	0.00472631	0	0.0269184	0.00591412	0.031902	0.125679	0.0267551	0	0	0.00591412	0.0356454	0.125679	0	0	0	0.00591412
ENSG00000065457	ADAT1	5.4579	5.42401	2.79028	4.28045	3.43819	4.42466	5.49441	5.42401	2.97663	4.28045	3.50751	4.42466	5.74257	5.42401	4.74587	4.28045	3.77485	4.42466
ENSG00000172081	MOB3A	46.3295	45.6924	115.33	55.4454	105.207	57.8077	44.3658	45.6924	106.981	55.4454	95.1647	57.8077	41.9038	45.6924	48.9887	55.4454	60.1319	57.8077
ENSG00000172086	KRCC1	20.4178	21.7114	12.3307	19.2809	15.2878	23.21	19.8757	21.7114	14.8291	19.2809	18.759	23.21	23.605	21.7114	23.6533	19.2809	21.8883	23.21
ENSG00000183826	BTBD9	2.88922	3.08721	5.78394	2.87276	4.87928	3.2294	2.69768	3.08721	5.77631	2.87276	5.4261	3.2294	2.79177	3.08721	3.02487	2.87276	3.32818	3.2294
ENSG00000108774	RAB5C	97.0677	96.631	153.661	105.449	164.4	93.1695	95.5309	96.631	137.91	105.449	147.299	93.1695	83.1463	96.631	115.106	105.449	89.8813	93.1695
ENSG00000078269	SYNJ2	3.02563	3.1775	17.7474	3.92464	8.93787	4.2637	2.63624	3.1775	18.6982	3.92464	11.1334	4.2637	2.58461	3.1775	5.81233	3.92464	4.98424	4.2637
ENSG00000108771	DHX58	1.76015	1.85246	1.61662	1.98374	2.06575	3.89019	2.29753	1.85246	1.20034	1.98374	1.98178	3.89019	1.82164	1.85246	4.47549	1.98374	4.72308	3.89019
ENSG00000146281	PM20D2	8.94669	7.90358	0.722264	5.81557	0.681895	4.29907	7.98915	7.90358	0.998221	5.81557	0.969016	4.29907	9.58421	7.90358	5.26754	5.81557	2.87748	4.29907
ENSG00000146282	RARS2	7.68008	7.84064	7.77837	6.75674	7.56178	6.56111	8.08425	7.84064	8.01334	6.75674	8.60441	6.56111	8.37016	7.84064	6.97726	6.75674	6.93273	6.56111
ENSG00000146285	SCML4	0.00583172	0.017918	0.010332	0.00805504	0.00735566	0	0.0116233	0.017918	0.00974805	0.00805504	0.00261677	0	0.0129872	0.017918	0.00326621	0.00805504	0.0199496	0
ENSG00000063854	HAGH	3.01053	3.20107	6.92366	6.47097	6.20959	5.02158	2.76686	3.20107	5.76	6.47097	6.33967	5.02158	2.38268	3.20107	4.4672	6.47097	4.73285	5.02158
ENSG00000248540	RP11-247C2.2	0.00640805	0	0	0	0	0.0142063	0	0	0.00535571	0	0	0.0142063	0	0	0	0	0	0.0142063
ENSG00000258191	AL805909.2	0	0	0	0	0	0	0	0	0	0	0	0	0	0	0	0	0	0
ENSG00000066379	ZNRD1	2.33373	2.32068	1.1613	2.92946	1.3827	2.17348	2.58473	2.32068	1.37903	2.92946	1.24748	2.17348	2.49792	2.32068	2.53184	2.92946	2.10976	2.17348
ENSG00000132394	EEFSEC	7.95803	9.51316	4.829	9.11455	4.71382	9.44933	8.57226	9.51316	4.13276	9.11455	3.87519	9.44933	7.71414	9.51316	7.68333	9.11455	6.58667	9.44933
ENSG00000145390	USP53	1.58181	1.08654	8.9273	3.81651	8.28142	5.06386	1.40678	1.08654	12.0246	3.81651	11.5871	5.06386	1.69366	1.08654	7.57369	3.81651	11.6946	5.06386
ENSG00000145391	SETD7	5.48254	5.0317	3.63888	4.34003	4.34059	4.89717	5.28535	5.0317	4.28809	4.34003	5.63338	4.89717	5.43071	5.0317	6.15297	4.34003	5.19393	4.89717
ENSG00000133627	ACTR3B	1.209	0.977167	0.448532	0.805622	0.347562	0.542165	1.05723	0.977167	0.54409	0.805622	0.457486	0.542165	0.91665	0.977167	0.636617	0.805622	0.410722	0.542165
ENSG00000138639	ARHGAP24	0.047229	0.0322469	0.0325403	0.0144966	0.0485392	0.0203592	0.311161	0.0322469	0.0153506	0.0144966	0.0447392	0.0203592	0.245416	0.0322469	0.0264518	0.0144966	0.0128226	0.0203592
ENSG00000139946	PELI2	0.743642	0.72438	0.213728	0.888677	0.202879	1.47276	0.592865	0.72438	0.33424	0.888677	0.326267	1.47276	0.758118	0.72438	0.936653	0.888677	1.14032	1.47276
ENSG00000101442	ACTR5	5.44715	5.55979	2.49898	3.48635	2.45016	2.2424	5.64108	5.55979	2.52836	3.48635	2.78148	2.2424	5.91037	5.55979	3.40943	3.48635	2.00444	2.2424
ENSG00000101443	WFDC2	0	0	0	0	0	0.0332851	0	0	0.0250967	0	0.0134739	0.0332851	0	0	0	0	0.0146745	0.0332851
ENSG00000101440	ASIP	0.10668	0.218517	0.118127	0.0736757	0.112131	0.059126	0.186047	0.218517	0.0891609	0.0736757	0.119672	0.059126	0.0593938	0.218517	0	0.0736757	0.0782014	0.059126
ENSG00000101441	CST4	0	0	0	0.0254415	0	0	0	0	0	0.0254415	0	0	0	0	0	0.0254415	0	0
ENSG00000101446	SPINT3	0	0	0	0	0	0	0	0	0	0	0	0	0	0	0	0	0	0
ENSG00000101447	FAM83D	2.8873	3.61324	0.862657	6.79624	0.624925	3.18156	3.08167	3.61324	0.878156	6.79624	0.620953	3.18156	2.74891	3.61324	4.42073	6.79624	2.21254	3.18156
ENSG00000101444	AHCY	43.582	44.9573	21.2883	45.9215	18.868	33.5077	47.1065	44.9573	20.5483	45.9215	16.5217	33.5077	40.5836	44.9573	40.0503	45.9215	25.1081	33.5077
ENSG00000101445	PPP1R16B	0.713256	0.830107	0.42218	0.832926	0.757881	2.70969	0.60418	0.830107	0.482318	0.832926	0.677918	2.70969	0.696736	0.830107	1.13306	0.832926	3.02936	2.70969
ENSG00000145649	GZMA	0	0	0	0	0.0390327	0	0	0	0.0387959	0	0.0416576	0	0.0775308	0	0	0	0	0
ENSG00000101448	EPPIN	0.00598479	0	0	0	0	0	0	0	0	0	0	0	0	0	0	0	0	0
ENSG00000214063	TSPAN4	0.628766	0.596665	0.361886	1.1318	0.477935	0.83479	0.534557	0.596665	0.282053	1.1318	0.398496	0.83479	0.632883	0.596665	0.692375	1.1318	0.555527	0.83479
ENSG00000137812	CASC5	3.00409	2.57497	0.460861	4.79621	0.37789	2.70166	2.71131	2.57497	0.598926	4.79621	0.466886	2.70166	4.0731	2.57497	3.93646	4.79621	2.05572	2.70166
ENSG00000172339	ALG14	0.445873	0.445619	0.545714	0.269749	0.559672	0.255476	0.425019	0.445619	0.549076	0.269749	0.682362	0.255476	0.443712	0.445619	0.45119	0.269749	0.237897	0.255476
ENSG00000137814	HAUS2	11.8842	11.4438	4.99164	7.80969	5.77955	7.33149	11.3314	11.4438	5.76856	7.80969	6.5085	7.33149	10.892	11.4438	7.81196	7.80969	6.59119	7.33149
ENSG00000137815	RTF1	11.6081	11.8407	10.3881	11.1858	10.145	10.4437	10.4106	11.8407	10.345	11.1858	11.4856	10.4437	11.2438	11.8407	11.9515	11.1858	9.58829	10.4437
ENSG00000137817	PARP6	4.32456	3.62279	2.10174	2.99657	2.79534	3.51157	4.03024	3.62279	2.10238	2.99657	2.90347	3.51157	4.38907	3.62279	3.42172	2.99657	3.44152	3.51157
ENSG00000137818	RPLP1	456.331	510.678	228.766	518.169	211.861	480.465	488.384	510.678	214.405	518.169	177.412	480.465	461.165	510.678	464.668	518.169	420.762	480.465
ENSG00000137819	PAQR5	1.77784	1.5778	5.22793	1.92327	3.49852	2.11145	1.42204	1.5778	5.76477	1.92327	4.68447	2.11145	1.5182	1.5778	4.06151	1.92327	4.08609	2.11145
ENSG00000112320	SOBP	0.625281	0.783929	0.286501	0.522833	0.148066	0.89626	0.687589	0.783929	0.252288	0.522833	0.235422	0.89626	0.64823	0.783929	0.817144	0.522833	0.807837	0.89626
ENSG00000172336	POP7	32.741	35.6832	27.0314	35.1769	25.3061	24.6761	33.1933	35.6832	24.3452	35.1769	21.6176	24.6761	26.495	35.6832	27.5003	35.1769	18.6176	24.6761
ENSG00000258053	CTD-2021H9.3	0.0367244	0	0	0	0	0	0	0	0	0	0	0	0	0	0	0	0	0
ENSG00000173068	BNC2	0.00280168	0.00286939	0.00496372	0.0103195	0	0.00310559	0.00698009	0.00286939	0.00117079	0.0103195	0.00125715	0.00310559	0	0.00286939	0	0.0103195	0.00273835	0.00310559
ENSG00000173065	FAM222B	3.77294	3.82174	4.98836	4.55495	4.85219	3.92785	4.01485	3.82174	4.6184	4.55495	5.06033	3.92785	3.58961	3.82174	3.57315	4.55495	3.44499	3.92785
ENSG00000173064	HECTD4	2.58669	2.56611	2.72527	3.08586	3.06207	3.27906	2.80575	2.56611	2.70524	3.08586	3.20657	3.27906	2.75835	2.56611	2.61935	3.08586	3.13018	3.27906
ENSG00000170647	TMEM133	0.302337	0.252302	0.0991939	0.278401	0.131822	0.37237	0.200864	0.252302	0.187175	0.278401	0.241178	0.37237	0.299245	0.252302	0.464094	0.278401	0.426837	0.37237
ENSG00000138092	CENPO	12.6421	13.6678	7.31162	14.1239	7.31991	10.4871	12.2538	13.6678	7.09637	14.1239	6.91789	10.4871	11.4055	13.6678	10.1132	14.1239	8.62222	10.4871
ENSG00000138095	LRPPRC	20.6323	19.6003	8.19031	17.2742	7.82819	16.4889	18.3198	19.6003	9.43493	17.2742	9.36007	16.4889	22.7089	19.6003	22.1064	17.2742	14.5515	16.4889
ENSG00000267854	KIR2DL4	0	0	0	0	0	0	0	0	0	0	0	0	0	0	0	0	0	0
ENSG00000267855	NDUFA7	14.1095	15.0981	15.2413	15.5157	14.091	14.3403	15.2819	15.0981	13.7303	15.5157	12.6149	14.3403	13.3051	15.0981	13.8568	15.5157	13.8678	14.3403
ENSG00000267857	PRED58	0.0846909	0.0867377	0.0500153	0.103981	0.0949531	0.0312926	0.0281331	0.0867377	0.0707828	0.103981	0.202677	0.0312926	0.0314343	0.0867377	0.0948666	0.103981	0.0827764	0.0312926
ENSG00000054148	PHPT1	13.0064	13.9333	32.301	19.7474	29.6006	12.5246	14.6955	13.9333	25.6673	19.7474	22.3295	12.5246	10.983	13.9333	15.0076	19.7474	10.9692	12.5246
ENSG00000080618	CPB2	0.035228	0.0240529	0.0104022	0.021626	0.00987415	0.0130164	0.0936177	0.0240529	0.00981425	0.021626	0.0316145	0.0130164	0.0130754	0.0240529	0.0131535	0.021626	0.0459088	0.0130164
ENSG00000085224	ATRX	3.68001	3.36389	2.60282	3.53715	3.44842	3.89668	2.90951	3.36389	3.20051	3.53715	4.24546	3.89668	5.12586	3.36389	4.77814	3.53715	5.41846	3.89668
ENSG00000144119	C1QL2	0.0101563	0	0	0	0.0085402	0	0	0	0	0	0.018229	0	0	0	0	0	0	0
ENSG00000144118	RALB	35.2346	33.469	38.0098	37.2496	39.54	40.9187	28.7077	33.469	40.0259	37.2496	43.0485	40.9187	31.0698	33.469	38.296	37.2496	40.1221	40.9187
ENSG00000144115	THNSL2	0.635347	0.74366	0.235465	0.588032	0.427945	1.0564	0.56209	0.74366	0.319689	0.588032	0.346179	1.0564	0.498106	0.74366	0.610016	0.588032	1.14375	1.0564
ENSG00000100311	PDGFB	0.148958	0.0282514	0.835706	0	0.56133	0.30577	0.142947	0.0282514	0.866859	0	0.604029	0.30577	0.251867	0.0282514	0.0308991	0	0.706384	0.30577
ENSG00000150433	TMEM218	3.53728	3.35067	1.87606	4.27075	2.55954	3.50869	3.43432	3.35067	1.82395	4.27075	2.56476	3.50869	3.35554	3.35067	4.08558	4.27075	3.72812	3.50869
ENSG00000100312	ACR	0.0100774	0	0	0	0.0169477	0	0	0	0.00842243	0	0.0180874	0	0	0	0	0	0	0
ENSG00000100314	CABP7	1.98643	2.14529	2.01347	2.47406	2.44663	2.25836	2.03669	2.14529	1.74535	2.47406	2.26834	2.25836	1.91412	2.14529	1.99689	2.47406	1.97886	2.25836
ENSG00000100316	RPL3	402.623	404.399	187.174	328.364	126.777	358.699	432.523	404.399	179.058	328.364	114.935	358.699	373.909	404.399	307.938	328.364	326.504	358.699
ENSG00000100319	ZMAT5	3.04823	3.13472	2.7668	3.34869	3.57374	3.35114	2.80694	3.13472	2.37501	3.34869	3.14562	3.35114	2.7739	3.13472	3.02886	3.34869	2.91203	3.35114
ENSG00000104679	R3HCC1	14.3983	15.223	12.2794	13.8468	16.6316	12.7506	14.2071	15.223	10.9919	13.8468	15.18	12.7506	12.0968	15.223	10.6314	13.8468	10.4717	12.7506
ENSG00000224770	BTNL2	0	0	0	0	0	0	0	0	0	0	0	0	0	0	0	0	0	0
ENSG00000235658	ATAT1	0	0	0	0	0	0	0	0	0	0	0	0	0	0	0	0	0	0
ENSG00000224774	CSNK2B	0	0	0	0	0	0	0	0	0	0	0	0	0	0	0	0	0	0
ENSG00000203782	LOR	0	0	0.0149436	0	0	0	0	0	0	0	0.0302779	0	0	0	0	0	0	0
ENSG00000203783	PRR9	0	0	0	0	0	0	0	0	0	0	0	0	0	0	0	0	0.0330028	0
ENSG00000203780	FANK1	0	0.0203454	0.057192	0	0.0167043	0.0165151	0.00494921	0.0203454	0.0456581	0	0.0089138	0.0165151	0.00552996	0.0203454	0	0	0.0145621	0.0165151
ENSG00000203786	KPRP	0.0164481	0	0	0	0	0	0.0163914	0	0	0	0	0	0	0	0	0	0.0160763	0
ENSG00000156876	SASS6	2.70597	2.78742	0.319301	3.06898	0.575438	2.18882	2.09277	2.78742	0.502091	3.06898	0.646951	2.18882	3.65293	2.78742	3.39389	3.06898	1.52153	2.18882
ENSG00000156875	HIAT1	33.9335	30.2911	18.4993	21.1062	19.0839	24.9851	32.6362	30.2911	21.0011	21.1062	23.9041	24.9851	36.3873	30.2911	28.0519	21.1062	27.8121	24.9851
ENSG00000203785	SPRR2E	0	0	0	0	0	0	0.112686	0	0	0	0	0	0	0	0	0	0	0
ENSG00000112818	MEP1A	0.236765	0.191051	0.0572012	0.0198201	0.0361984	0.198825	0.3575	0.191051	0.131922	0.0198201	0.0321939	0.198825	0.279615	0.191051	0.0964412	0.0198201	0.133238	0.198825
ENSG00000182938	OTOP3	0	0	0	0	0	0.036566	0.00821852	0	0	0	0.014802	0.036566	0	0	0	0	0	0.036566
ENSG00000181374	CCL13	0	0	0.172791	0	0.184523	0.0270271	0.0485965	0	0.224159	0	0.306337	0.0270271	0.0542989	0	0.0273118	0	0	0.0270271
ENSG00000144426	NBEAL1	2.46062	2.14246	0.697019	1.88545	0.856613	1.84972	2.75519	2.14246	0.85777	1.88545	0.924452	1.84972	2.04856	2.14246	1.85927	1.88545	1.8861	1.84972
ENSG00000181378	CCDC108	0.00986276	0.00202022	0	0.00363277	0	0.00218652	0	0.00202022	0	0.00363277	0	0.00218652	0.00439285	0.00202022	0	0.00363277	0.00578388	0.00218652
ENSG00000182931	WFDC10B	0	0	0	0	0	0	0	0	0	0	0	0	0.0733466	0	0	0	0	0
ENSG00000112812	PRSS16	0.101981	0.116497	0.0243222	0.0975193	0.0296841	0.139131	0.121174	0.116497	0.0360604	0.0975193	0.0528004	0.139131	0.0786154	0.116497	0.0746918	0.0975193	0.118844	0.139131
ENSG00000182934	SRPR	73.1278	69.7087	60.691	75.6376	52.9165	60.9967	73.9081	69.7087	59.7079	75.6376	52.48	60.9967	70.8872	69.7087	73.5867	75.6376	67.299	60.9967
ENSG00000064195	DLX3	12.8317	19.654	5.14522	29.17	4.17072	30.9717	6.61842	19.654	5.07159	29.17	3.64188	30.9717	6.97806	19.654	24.184	29.17	32.299	30.9717
ENSG00000064199	SPA17	3.97046	3.60507	3.79972	4.69129	4.04932	5.66936	3.57144	3.60507	3.83152	4.69129	4.02828	5.66936	3.702	3.60507	5.25129	4.69129	6.80293	5.66936
ENSG00000086758	HUWE1	13.9714	12.3446	14.484	15.1363	14.1405	15.2817	18.4211	12.3446	14.5987	15.1363	14.4654	15.2817	16.9415	12.3446	14.1517	15.1363	14.391	15.2817
ENSG00000262988	CLDN4	0	0	0	0	0	0	0	0	0	0	0	0	0	0	0	0	0	0
ENSG00000262985	LILRB1	0	0	0	0	0	0	0	0	0	0	0	0	0	0	0	0	0	0
ENSG00000100722	ZC3H14	6.82708	6.31045	4.22835	4.90004	4.55056	5.745	5.52509	6.31045	4.53051	4.90004	5.23494	5.745	7.01844	6.31045	6.17321	4.90004	5.47183	5.745
ENSG00000262982	RDH13	0	0	0	0	0	0	0	0	0	0	0	0	0	0	0	0	0	0
ENSG00000260851	RP11-403P17.5	2.9044	3.47877	2.87811	2.42515	3.58059	4.33808	2.62458	3.47877	2.94173	2.42515	3.55631	4.33808	2.65849	3.47877	2.5641	2.42515	2.33355	4.33808
ENSG00000169660	HEXDC	3.5573	4.12427	2.81043	3.56091	3.36517	3.11245	3.43551	4.12427	2.55137	3.56091	3.04894	3.11245	3.71625	4.12427	3.15643	3.56091	2.77858	3.11245
ENSG00000156299	TIAM1	0.00237107	0.00971351	0.0273053	0.00436671	0.0139565	0.00788482	0	0.00971351	0.025762	0.00436671	0.0212786	0.00788482	0.00264018	0.00971351	0.00265596	0.00436671	0.0115874	0.00788482
ENSG00000156298	TSPAN7	0.0267301	0.0273761	0.609728	0.0615348	0.994599	0.0370371	0.0266381	0.0273761	0.921544	0.0615348	1.10946	0.0370371	0.0223229	0.0273761	0.104796	0.0615348	0.0391888	0.0370371
ENSG00000261721	GRINA	0	0	0	0	0	0	0	0	0	0	0	0	0	0	0	0	0	0
ENSG00000168398	BDKRB2	0.109549	0.0636794	0.173105	0.0545278	0.473038	0.157534	0.150481	0.0636794	0.222711	0.0545278	0.353394	0.157534	0.181326	0.0636794	0.189043	0.0545278	0.196783	0.157534
ENSG00000168393	DTYMK	12.9016	13.066	5.34696	19.8471	5.44571	7.15994	14.7301	13.066	5.28532	19.8471	4.58116	7.15994	12.0376	13.066	12.5078	19.8471	5.02248	7.15994
ENSG00000269533	AC003002.6	1.61193	1.52795	1.27601	1.46852	1.47079	1.71075	1.40131	1.52795	1.4762	1.46852	1.36964	1.71075	1.48936	1.52795	1.49827	1.46852	2.02802	1.71075
ENSG00000168397	ATG4B	8.77733	9.39924	8.39285	9.6972	8.17447	8.06976	9.50718	9.39924	7.69904	9.6972	7.37488	8.06976	8.28381	9.39924	8.37886	9.6972	7.33546	8.06976
ENSG00000168395	ING5	2.93779	3.33015	1.64081	1.99454	1.82349	1.6072	3.10924	3.33015	1.79339	1.99454	1.60322	1.6072	2.82885	3.33015	1.71766	1.99454	0.964547	1.6072
ENSG00000168394	TAP1	27.7022	23.5362	31.8308	33.0718	38.972	41.7803	42.7248	23.5362	29.7283	33.0718	35.7065	41.7803	32.264	23.5362	43.6222	33.0718	41.5954	41.7803
ENSG00000197822	OCLN	0.954448	1.19125	0.0625284	0.977794	0.118709	0.921906	0.60862	1.19125	0.128249	0.977794	0.156988	0.921906	0.833815	1.19125	0.618787	0.977794	0.58192	0.921906
ENSG00000197826	C4orf22	0	0	0	0	0.00389804	0	0	0	0	0	0	0	0	0	0.00519265	0	0.0135926	0
ENSG00000228083	IFNA14	0	0	0.0236255	0.0245586	0	0	0	0	0	0.0245586	0	0	0	0	0	0.0245586	0	0
ENSG00000228080	HLA-DRB1	0	0	0	0	0	0	0	0	0	0	0	0	0	0	0	0	0	0
ENSG00000180424	DEFB123	0	0	0	0	0	0	0	0	0	0	0	0	0	0	0	0	0	0
ENSG00000180423	HARBI1	5.91611	6.83344	6.13839	6.68227	6.50845	5.88393	6.10547	6.83344	6.39731	6.68227	6.6943	5.88393	5.78039	6.83344	5.08153	6.68227	5.52335	5.88393
ENSG00000220256	AC093802.1	0.0128161	0	0	0	0	0	0	0	0	0	0	0	0	0	0	0	0	0
ENSG00000103152	MPG	53.7782	65.7097	61.9364	76.1732	55.5257	87.1675	51.3273	65.7097	50.5741	76.1732	46.5579	87.1675	48.3644	65.7097	60.4076	76.1732	81.9267	87.1675
ENSG00000151470	C4orf33	0.422971	0.557396	0.199134	0.702707	0.31836	0.70164	0.415619	0.557396	0.299124	0.702707	0.379586	0.70164	0.447921	0.557396	0.967464	0.702707	0.896204	0.70164
ENSG00000123500	COL10A1	0.0489369	0.0222754	0.154135	0	0.0548668	0.126572	0.0108374	0.0222754	0.159057	0	0.097594	0.126572	0.0726547	0.0222754	0.0365445	0	0.0318871	0.126572
ENSG00000103154	NECAB2	0.81515	0.784253	0.0437634	0.250205	0.193863	0.830557	0.50874	0.784253	0.0825799	0.250205	0.155174	0.830557	0.733466	0.784253	0.110678	0.250205	0.59553	0.830557
ENSG00000151475	SLC25A31	0	0	0	0	0	0.0250682	0.0338057	0	0	0	0	0.0250682	0	0	0	0	0	0.0250682
ENSG00000156127	BATF	7.2199	10.7555	7.78364	10.9375	12.2846	10.0918	7.11063	10.7555	7.02519	10.9375	11.9706	10.0918	6.12968	10.7555	7.66048	10.9375	6.60142	10.0918
ENSG00000153187	HNRNPU	105.002	101.366	51.3454	78.6424	50.3766	90.5782	101.548	101.366	56.6467	78.6424	59.4765	90.5782	106.477	101.366	75.71	78.6424	79.2557	90.5782
ENSG00000013523	ANGEL1	7.61363	7.11802	4.24883	7.18595	5.13281	7.69105	6.98412	7.11802	4.4368	7.18595	4.32178	7.69105	7.12527	7.11802	6.98965	7.18595	8.42765	7.69105
ENSG00000142515	KLK3	0	0	0	0	0	0	0.00891477	0	0	0	0	0	0	0	0	0	0	0
ENSG00000142511	GPR32	0	0.0669842	0	0.0301128	0	0	0	0.0669842	0.0273314	0.0301128	0.0146737	0	0.0728264	0.0669842	0	0.0301128	0	0
ENSG00000142513	ACPT	0.369697	0.315527	0.0545824	0.0709226	0.0518118	0.17075	0.199563	0.315527	0.0386231	0.0709226	0.06912	0.17075	0.22298	0.315527	0.224313	0.0709226	0.120447	0.17075
ENSG00000142512	SIGLEC10	0.503595	0.434635	0.686705	0.583565	1.01821	0.539406	0.648472	0.434635	0.647893	0.583565	0.837866	0.539406	0.737167	0.434635	0.564103	0.583565	0.298645	0.539406
ENSG00000229974	AC083862.1	0.864553	2.65634	0.919032	0.318443	1.01778	4.98334	2.06778	2.65634	0.433545	0.318443	2.32762	4.98334	1.92535	2.65634	1.3558	0.318443	7.60508	4.98334
ENSG00000068745	IP6K2	6.61512	5.98527	8.15755	7.57264	7.43013	7.33678	6.58498	5.98527	7.63174	7.57264	7.21793	7.33678	6.35529	5.98527	8.19102	7.57264	7.86832	7.33678
ENSG00000168539	CHRM1	0	0	0	0.0117579	0.010737	0.0141539	0	0	0	0.0117579	0	0.0141539	0	0	0	0.0117579	0	0.0141539
ENSG00000167889	MGAT5B	0.0812295	0.11647	0.0431741	0.0747986	0.0464469	0.108049	0.110092	0.11647	0.0841834	0.0747986	0.0437385	0.108049	0.0578871	0.11647	0.050954	0.0747986	0.0635146	0.108049
ENSG00000065717	TLE2	0.190125	0.199982	0.109246	0.123024	0.120984	0.205052	0.286765	0.199982	0.0515358	0.123024	0.156788	0.205052	0.349023	0.199982	0.0978503	0.123024	0.17076	0.205052
ENSG00000163704	PRRT3	1.07987	1.18689	0.667284	0.693637	0.779584	0.870019	1.20214	1.18689	0.74844	0.693637	0.60037	0.870019	1.04992	1.18689	0.637261	0.693637	0.849514	0.870019
ENSG00000184428	TOP1MT	6.86166	7.33432	3.60421	6.87907	2.96618	6.97393	7.35489	7.33432	3.51897	6.87907	2.72043	6.97393	6.8692	7.33432	4.5864	6.87907	4.47418	6.97393
ENSG00000163701	IL17RE	0.594611	0.727142	0.7901	0.800874	0.619398	0.811592	0.521809	0.727142	0.652728	0.800874	0.740696	0.811592	0.568217	0.727142	0.591496	0.800874	0.89344	0.811592
ENSG00000167880	EVPL	0.121567	0.144313	0.0220274	0.259503	0.018586	0.309321	0.0660809	0.144313	0.0184733	0.259503	0.00495897	0.309321	0.0922937	0.144313	0.0835609	0.259503	0.170127	0.309321
ENSG00000167881	SRP68	16.7742	17.2406	13.3086	15.3156	12.3563	14.8448	16.3743	17.2406	13.2607	15.3156	12.4411	14.8448	15.7651	17.2406	13.7363	15.3156	12.3351	14.8448
ENSG00000055950	MRPL43	9.91296	10.3607	9.39866	10.8019	9.94217	9.14723	10.9263	10.3607	8.05206	10.8019	8.67726	9.14723	9.99694	10.3607	9.54282	10.8019	7.7931	9.14723
ENSG00000055957	ITIH1	0.00913461	0.00467769	0.0121378	0	0.00384055	0.00506274	0.00910315	0.00467769	0.00381725	0	0	0.00506274	0	0.00467769	0.00511607	0	0.00892812	0.00506274
ENSG00000055955	ITIH4	0.341896	0.451316	0.17499	0.426767	0.255549	0.526365	0.306646	0.451316	0.177799	0.426767	0.272734	0.526365	0.253799	0.451316	0.582973	0.426767	0.779723	0.526365
ENSG00000136840	ST6GALNAC4	12.6073	13.6554	30.045	15.1036	27.5447	11.5962	10.0323	13.6554	24.3906	15.1036	22.5858	11.5962	10.1641	13.6554	16.3933	15.1036	12.8159	11.5962
ENSG00000263761	GDF2	0	0	0	0	0	0	0	0	0	0	0	0	0	0	0	0	0	0
ENSG00000204963	PCDHA7	0.562719	0.799541	0.40019	0.536414	0.609801	1.33098	0.572628	0.799541	0.370947	0.536414	0.725491	1.33098	0.503032	0.799541	0.705792	0.536414	1.57253	1.33098
ENSG00000115137	DNAJC27	0.686231	0.570566	0.333361	0.570751	0.446739	0.715684	0.724311	0.570566	0.428611	0.570751	0.483403	0.715684	0.710708	0.570566	0.789346	0.570751	1.06017	0.715684
ENSG00000259040	BLOC1S5-TXNDC5	33.911	32.5354	14.7106	23.6404	14.9313	24.6624	32.4362	32.5354	15.0639	23.6404	14.5956	24.6624	34.1988	32.5354	22.9662	23.6404	23.5197	24.6624
ENSG00000132549	VPS13B	2.17348	2.07092	2.84682	3.05412	2.93403	3.67923	2.03117	2.07092	3.2783	3.05412	3.82979	3.67923	2.38284	2.07092	3.98217	3.05412	4.30694	3.67923
ENSG00000115138	POMC	3.23786	3.32993	3.09531	3.49086	4.03859	4.56112	2.54103	3.32993	2.98802	3.49086	3.88642	4.56112	2.35849	3.32993	2.97707	3.49086	3.78441	4.56112
ENSG00000051180	RAD51	7.7692	7.43739	1.12993	6.4	0.853185	3.37409	7.73522	7.43739	1.18721	6.4	0.891047	3.37409	7.46468	7.43739	4.31075	6.4	1.90548	3.37409
ENSG00000205436	EXOC3L4	0.0357746	0.0183196	0.0158454	0.0219616	0	0.0264368	0.059419	0.0183196	0.00996655	0.0219616	0.0160525	0.0264368	0.0730305	0.0183196	0.0267153	0.0219616	0.0174829	0.0264368
ENSG00000257917	AL901607.1	0	0	0	0	0	0	0	0	0	0	0	0	0	0	0	0	0	0
ENSG00000257914	AL662834.2	0	0	0	0	0	0	0	0	0	0	0	0	0	0	0	0	0	0
ENSG00000205439	KRTAP12-3	0	0	0	0	0	0	0	0	0	0	0	0	0	0	0	0	0	0
ENSG00000157456	CCNB2	8.1519	8.36056	2.10496	18.1643	2.23712	12.6532	7.87456	8.36056	1.81495	18.1643	2.22431	12.6532	8.08963	8.36056	11.8186	18.1643	8.88996	12.6532
ENSG00000166289	PLEKHF1	2.56173	2.11635	9.95475	2.79365	10.6404	3.21709	1.86648	2.11635	7.72974	2.79365	9.26532	3.21709	1.70631	2.11635	3.88383	2.79365	5.46908	3.21709
ENSG00000157450	RNF111	7.46061	6.57852	6.76508	6.03183	7.30609	7.24496	6.59121	6.57852	7.85585	6.03183	8.48976	7.24496	7.39681	6.57852	7.41838	6.03183	7.10839	7.24496
ENSG00000108984	MAP2K6	0.0169382	0.013878	0.00600184	0.0311944	0.00569719	0.0450613	0.0101279	0.013878	0	0.0311944	0	0.0450613	0.0188606	0.013878	0.0189733	0.0311944	0.0231774	0.0450613
ENSG00000165959	CLMN	0.0158583	0.037897	0.143992	0.012169	0.077787	0.023438	0.0223886	0.037897	0.0994052	0.012169	0.0853899	0.023438	0.0206011	0.037897	0.00592123	0.012169	0.0167915	0.023438
ENSG00000149527	PLCH2	0.0192461	0.015769	0.0221638	0.00354449	0.0226572	0.00640016	0.00383597	0.015769	0.0225197	0.00354449	0.0155448	0.00640016	0.00857219	0.015769	0.00862344	0.00354449	0.00188111	0.00640016
ENSG00000165953	SERPINA12	0.0182331	0	0.00807585	0.0083948	0	0.0101055	0.00908515	0	0.0152388	0.0083948	0	0.0101055	0	0	0	0.0083948	0.0267314	0.0101055
ENSG00000127990	SGCE	0	0.00834344	0	0	0.00685027	0	0	0.00834344	0	0	0	0	0.0181423	0.00834344	0	0	0.00796239	0
ENSG00000127993	RBM48	3.20319	3.30014	1.88324	3.01105	1.92393	3.39743	2.9784	3.30014	2.41821	3.01105	2.41264	3.39743	3.49243	3.30014	3.32643	3.01105	3.79235	3.39743
ENSG00000162078	ZG16B	0	0.0103865	0.0359348	0	0	0	0.0202129	0.0103865	0	0	0	0	0	0.0103865	0	0	0	0
ENSG00000127995	CASD1	1.1219	1.22158	0.359174	0.982333	0.592511	1.25233	0.870892	1.22158	0.480346	0.982333	0.582898	1.25233	1.13088	1.22158	1.28316	0.982333	1.01959	1.25233
ENSG00000162076	FLYWCH2	8.1629	8.82723	14.3409	10.1762	13.0122	9.80661	8.64984	8.82723	12.8317	10.1762	12.755	9.80661	7.70139	8.82723	10.7102	10.1762	7.42865	9.80661
ENSG00000182111	ZNF716	0	0.00408904	0	0.00367646	0.00335725	0	0	0.00408904	0	0.00367646	0	0	0	0.00408904	0	0.00367646	0.00780459	0
ENSG00000166750	SLFN5	2.5692	2.33363	9.30102	3.6825	6.2498	8.51789	2.2823	2.33363	11.4829	3.6825	7.62469	8.51789	3.16067	2.33363	7.08621	3.6825	12.1825	8.51789
ENSG00000162073	PAQR4	15.8831	18.7696	7.88537	21.6202	9.83924	14.3247	14.8543	18.7696	6.64029	21.6202	8.17642	14.3247	13.7055	18.7696	13.154	21.6202	11.655	14.3247
ENSG00000157985	AGAP1	1.95159	1.64702	5.5052	1.95933	4.80513	2.11694	1.70381	1.64702	5.4711	1.95933	4.91922	2.11694	1.65434	1.64702	2.04056	1.95933	2.26357	2.11694
ENSG00000254245	PCDHGA3	48.9016	57.97	46.5004	50.5027	52.8771	62.0426	43.1966	57.97	44.0267	50.5027	46.8253	62.0426	42.6261	57.97	38.4293	50.5027	54.75	62.0426
ENSG00000165480	SKA3	5.0852	4.90831	0.633191	7.33421	0.767055	3.22966	4.51818	4.90831	0.830676	7.33421	0.788091	3.22966	5.35156	4.90831	5.39118	7.33421	2.07593	3.22966
ENSG00000165487	MICU2	6.67694	6.68648	5.65208	5.88581	4.86654	6.85134	5.30725	6.68648	6.30957	5.88581	7.09734	6.85134	8.07599	6.68648	8.49472	5.88581	7.66848	6.85134
ENSG00000178235	SLITRK1	0.00800357	0.0040985	0	0.0110549	0	0	0.015952	0.0040985	0	0.0110549	0	0	0	0.0040985	0	0.0110549	0.00391132	0
ENSG00000178234	GALNT11	3.84357	3.69043	3.08782	2.79501	3.96843	3.80837	4.08968	3.69043	3.02624	2.79501	4.57888	3.80837	4.07918	3.69043	2.70488	2.79501	3.88631	3.80837
ENSG00000178233	TMEM151B	0.577741	0.478813	0.6128	0.728002	0.795834	0.501374	0.409086	0.478813	0.686174	0.728002	0.794775	0.501374	0.537503	0.478813	0.617354	0.728002	0.378931	0.501374
ENSG00000206013	IFITM5	0.0845758	0.144366	0	0.02596	0.023706	0	0.0842845	0.144366	0	0.02596	0	0	0	0.144366	0	0.02596	0.110219	0
ENSG00000005381	MPO	0.154674	0.158412	0.0202989	0.131878	0.0289028	0.069851	0.0742163	0.158412	0.0574548	0.131878	0	0.069851	0.114819	0.158412	0.0898378	0.131878	0.0783885	0.069851
ENSG00000154188	ANGPT1	0.0379009	0.0119436	0.00774792	0.0832237	0.00490309	0.0840243	0.0203379	0.0119436	0.00974668	0.0832237	0	0.0840243	0.0357097	0.0119436	0.0359232	0.0832237	0.102584	0.0840243
ENSG00000158604	TMED4	22.8798	22.9817	31.7187	28.6472	33.5065	30.4572	22.3731	22.9817	29.7971	28.6472	32.4298	30.4572	20.6583	22.9817	27.0657	28.6472	33.63	30.4572
ENSG00000257260	CR847794.2	0	0	0	0	0	0	0	0	0	0	0	0	0	0	0	0	0	0
ENSG00000153944	MSI2	1.02823	1.00459	2.38244	1.93815	2.33626	2.16599	0.846527	1.00459	2.5862	1.93815	3.29472	2.16599	0.958774	1.00459	1.94417	1.93815	2.04493	2.16599
ENSG00000228867	NRM	0	0	0	0	0	0	0	0	0	0	0	0	0	0	0	0	0	0
ENSG00000256797	KLRF2	0	0	0	0	0	0	0	0	0	0	0	0	0	0	0	0	0	0
ENSG00000009724	MASP2	0.5662	0.389922	0.121067	0.332601	0.209322	0.54646	0.476694	0.389922	0.183576	0.332601	0.306626	0.54646	0.57611	0.389922	0.612359	0.332601	0.596337	0.54646
ENSG00000185467	KPNA7	0.0240571	0.0246385	0.0213109	0	0.0202291	0	0.0239743	0.0246385	0.0100532	0	0	0	0	0.0246385	0	0	0	0
ENSG00000101161	PRPF6	34.1368	37.119	25.8017	32.2062	27.6674	30.5181	35.6563	37.119	23.939	32.2062	26.0473	30.5181	31.7796	37.119	26.7623	32.2062	22.632	30.5181
ENSG00000101160	CTSZ	92.4656	89.3615	145.692	83.3357	155.428	85.9623	94.7851	89.3615	121.639	83.3357	144.006	85.9623	80.6833	89.3615	94.2466	83.3357	78.3943	85.9623
ENSG00000121270	ABCC11	0.455304	0.586551	0.372889	0.416621	0.42379	0.488822	0.445175	0.586551	0.390106	0.416621	0.480557	0.488822	0.557995	0.586551	0.574162	0.416621	0.509384	0.488822
ENSG00000170027	YWHAG	155.578	153.351	153.725	112.757	151.144	98.2092	154.915	153.351	169.028	112.757	168.563	98.2092	148.453	153.351	133.204	112.757	102.067	98.2092
ENSG00000171777	RASGRP4	0.221081	0.242992	0.0764268	0.292954	0.0680131	0.549897	0.128968	0.242992	0.0585871	0.292954	0.0677477	0.549897	0.150105	0.242992	0.181203	0.292954	0.247705	0.549897
ENSG00000171773	NXNL1	0	0	0	0	0	0	0.0874326	0	0	0	0.0196839	0	0.024423	0	0	0	0.0428757	0
ENSG00000171772	SYCE1	0.021216	0.00724292	0.0062647	0	0.0356802	0.0156783	0	0.00724292	0	0	0	0.0156783	0	0.00724292	0.0158434	0	0.00691214	0.0156783
ENSG00000175213	ZNF408	6.12771	7.34593	5.18336	6.05227	5.04496	5.25309	6.62388	7.34593	4.11853	6.05227	4.95469	5.25309	5.65219	7.34593	5.64823	6.05227	4.07845	5.25309
ENSG00000175215	CTDSP2	37.1024	38.0225	37.5314	56.628	37.1203	62.6394	34.9304	38.0225	35.7288	56.628	36.3967	62.6394	35.3143	38.0225	41.9447	56.628	60.5351	62.6394
ENSG00000104537	ANXA13	0	0	0	0	0	0	0	0	0.00911287	0	0	0	0	0	0.00610676	0	0	0
ENSG00000179546	HTR1D	0	0	0	0	0	0	0	0	0	0	0.0130719	0	0	0	0	0	0.0142367	0
ENSG00000179542	SLITRK4	4.7595	4.81023	2.57667	4.58181	2.266	6.47681	3.92285	4.81023	3.43182	4.58181	2.95464	6.47681	4.86213	4.81023	6.21427	4.58181	8.25617	6.47681
ENSG00000170790	OR10A2	0.0197049	0	0	0.0181449	0	0	0	0	0	0.0181449	0	0	0	0	0	0.0181449	0.0770379	0
ENSG00000170791	CHCHD7	3.74237	3.80745	3.76324	3.03894	4.50022	2.57996	3.35935	3.80745	4.28371	3.03894	4.66317	2.57996	4.1671	3.80745	2.78147	3.03894	2.33364	2.57996
ENSG00000196693	ZNF33B	0.459702	0.438711	0.160422	0.493859	0.257702	0.857	0.329707	0.438711	0.244497	0.493859	0.328164	0.857	0.500242	0.438711	0.464222	0.493859	0.49356	0.857
ENSG00000124313	IQSEC2	3.44232	4.66405	6.39441	7.23425	8.03964	7.45304	2.51567	4.66405	5.4053	7.23425	7.26168	7.45304	2.14382	4.66405	5.51179	7.23425	7.68155	7.45304
ENSG00000197124	ZNF682	0.225535	0.256651	0.0850955	0.215372	0.101848	0.217593	0.291354	0.256651	0.0767954	0.215372	0.149927	0.217593	0.358096	0.256651	0.224563	0.215372	0.371477	0.217593
ENSG00000197125	OR8B8	0	0	0	0	0	0.0445305	0.0400345	0	0	0	0	0.0445305	0	0	0	0	0	0.0445305
ENSG00000197122	SRC	3.27553	2.59981	15.8533	0.851326	13.1091	1.55658	8.94107	2.59981	15.6291	0.851326	11.59	1.55658	7.48206	2.59981	2.09967	0.851326	2.44381	1.55658
ENSG00000197123	ZNF679	0	0.0271228	0	0	0	0	0	0.0271228	0	0	0	0	0	0.0271228	0	0	0.0258841	0
ENSG00000197121	PGAP1	0.261784	0.223149	0.354332	0.287474	0.332245	0.403731	0.213892	0.223149	0.388665	0.287474	0.427548	0.403731	0.354864	0.223149	0.468088	0.287474	0.511733	0.403731
ENSG00000161835	GRASP	0.0660104	0.1277	0.578253	0.101307	0.388547	0.0813009	0.0804015	0.1277	0.545571	0.101307	0.513409	0.0813009	0.0816691	0.1277	0.106805	0.101307	0.16488	0.0813009
ENSG00000197128	ZNF772	0.08169	0.0766923	0.120608	0.100297	0.174591	0.128281	0.0440964	0.0766923	0.13086	0.100297	0.174113	0.128281	0.0568508	0.0766923	0.0724416	0.100297	0.126419	0.128281
ENSG00000255537	AP000708.1	0.0121234	0.0434575	0.021479	0.0334909	0.0203887	0.00671926	0.0120817	0.0434575	0	0.0334909	0.0108799	0.00671926	0.0269988	0.0434575	0	0.0334909	0	0.00671926
ENSG00000006125	AP2B1	21.9149	19.7463	19.3707	23.7356	20.1329	26.7286	20.4312	19.7463	19.4681	23.7356	20.4312	26.7286	22.6804	19.7463	24.1336	23.7356	26.1611	26.7286
ENSG00000121898	CPXM2	0	0	0.0195997	0	0	0.0049051	0.00881971	0	0.0073968	0	0.00794239	0.0049051	0.00492732	0	0	0	0.00432506	0.0049051
ENSG00000121897	LIAS	2.37471	1.86289	0.939919	1.75247	1.13296	2.22159	1.96372	1.86289	0.668616	1.75247	1.20915	2.22159	2.36293	1.86289	2.65061	1.75247	2.03296	2.22159
ENSG00000121895	TMEM156	0.307756	0.414729	0.193707	0.611529	0.190684	1.49024	0.16949	0.414729	0.230141	0.611529	0.218044	1.49024	0.477955	0.414729	1.00699	0.611529	1.86021	1.49024
ENSG00000006128	TAC1	0	0	0	0	0	0	0	0	0	0	0	0	0	0	0	0	0	0
ENSG00000121892	PDS5A	11.1601	10.608	8.35292	9.02724	8.98115	9.32704	10.4795	10.608	9.89153	9.02724	11.1735	9.32704	13.3487	10.608	11.4079	9.02724	10.2033	9.32704
ENSG00000203995	ZYG11A	0.623274	0.647391	0.133136	0.598352	0.156114	0.489988	0.629937	0.647391	0.188417	0.598352	0.126943	0.489988	0.73831	0.647391	0.554567	0.598352	0.349957	0.489988
ENSG00000203993	C9orf37	8.03597	8.98048	8.40657	8.37533	8.07462	8.23304	9.22133	8.98048	7.59233	8.37533	7.34318	8.23304	7.69303	8.98048	6.02205	8.37533	7.45775	8.23304
ENSG00000198695	MT-ND6	1785.74	1683.34	69.7764	2009.32	80.5914	1364.1	1873.41	1683.34	73.0007	2009.32	84.5568	1364.1	1751.34	1683.34	1765.44	2009.32	1297.74	1364.1
ENSG00000198691	ABCA4	0.0765921	0.0735404	0.279876	0.00881604	0.219378	0.00530627	0.100181	0.0735404	0.300066	0.00881604	0.285683	0.00530627	0.071959	0.0735404	0.0134054	0.00881604	0.0304121	0.00530627
ENSG00000198690	FAN1	4.30797	3.78424	1.86358	3.65536	1.76617	6.65419	4.06946	3.78424	2.13343	3.65536	2.39902	6.65419	4.5246	3.78424	4.67173	3.65536	6.19146	6.65419
ENSG00000198692	EIF1AY	2.90306	3.60438	2.94614	3.57838	3.79445	3.40992	2.92859	3.60438	3.3032	3.57838	3.7251	3.40992	4.20798	3.60438	4.54691	3.57838	3.79819	3.40992
ENSG00000181135	ZNF707	3.95115	4.03321	3.94452	4.677	3.29762	4.48879	4.04864	4.03321	3.53249	4.677	3.11624	4.48879	3.46125	4.03321	4.18347	4.677	4.10219	4.48879
ENSG00000176746	MAGEB6	0	0	0	0	0.0268563	0	0	0	0	0	0.0095541	0	0	0	0	0	0	0
ENSG00000176742	OR51V1	0	0	0	0	0	0	0.0428112	0	0	0	0	0	0	0	0	0	0	0
ENSG00000176749	CDK5R1	2.16848	2.46165	0.934969	1.16186	1.29899	1.22312	1.41996	2.46165	0.910193	1.16186	1.30024	1.22312	1.9071	2.46165	1.1339	1.16186	1.01284	1.22312
ENSG00000028137	TNFRSF1B	60.9751	62.9284	259.911	73.509	194.31	77.3304	71.1369	62.9284	235.661	73.509	177.942	77.3304	55.9936	62.9284	75.843	73.509	85.8813	77.3304
ENSG00000176293	ZNF135	0	0.00993334	0	0	0	0	0	0.00993334	0	0	0	0	0	0.00993334	0	0	0.0252792	0
ENSG00000176294	OR4N2	0	0	0	0	0	0.0153436	0.0275888	0	0	0	0	0.0153436	0	0	0	0	0	0.0153436
ENSG00000176299	OR4M1	0.0371851	0	0	0	0	0	0	0	0	0	0	0	0	0	0	0	0	0
ENSG00000204508	PRAMEF22	0	0.0146962	0	0	0	0.015906	0	0.0146962	0	0	0	0.015906	0	0.0146962	0	0	0.0280501	0.015906
ENSG00000204501	PRAMEF9	0	0.0456269	0	0	0	0.0864199	0	0.0456269	0.0186171	0	0	0.0864199	0	0.0456269	0	0	0.0108858	0.0864199
ENSG00000204503	PRAMEF3	0	0	0	0	0	0.0109316	0	0	0	0	0	0.0109316	0	0	0	0	0.0481944	0.0109316
ENSG00000204502	PRAMEF5	0	0	0	0	0	0.0247979	0	0	0.0186973	0	0	0.0247979	0	0	0	0	0.0655964	0.0247979
ENSG00000178796	RIIAD1	0	0	0	0	0	0	0	0	0	0	0	0	0	0	0	0	0.00896958	0
ENSG00000178795	GDPD4	0.0195257	0	0	0.00599327	0	0.00721456	0	0	0	0.00599327	0	0.00721456	0	0	0	0.00599327	0.0508914	0.00721456
ENSG00000272352	CLEC4F	0	0	0	0	0	0	0	0	0	0	0	0	0	0	0	0	0	0
ENSG00000272358	KDM2B	0	0	0	0	0	0	0	0	0	0	0	0	0	0	0	0	0	0
ENSG00000092621	PHGDH	45.8462	54.5065	1.18026	14.301	0.900002	92.3192	45.6111	54.5065	1.11664	14.301	0.871097	92.3192	45.5919	54.5065	11.0672	14.301	60.5376	92.3192
ENSG00000268916	CSAG2	0	0	0	0	0	0	0	0	0	0	0	0	0	0	0	0	0	0
ENSG00000268919	RHOXF2	0	0	0	0	0	0	0	0	0	0	0	0	0	0	0	0	0	0
ENSG00000136383	ALPK3	0.0663825	0.0776992	0.0655251	0.068113	0.0988805	0.142962	0.0661539	0.0776992	0.0776735	0.068113	0.11404	0.142962	0.0718046	0.0776992	0.0467396	0.068113	0.12791	0.142962
ENSG00000136381	IREB2	10.2978	9.58899	5.8156	9.21203	5.84817	9.89516	9.5907	9.58899	6.96657	9.21203	7.56659	9.89516	11.9092	9.58899	11.8728	9.21203	10.2583	9.89516
ENSG00000132801	ZSWIM3	2.67161	2.51844	1.34339	2.44052	1.37054	2.52937	2.71184	2.51844	1.07202	2.44052	0.890345	2.52937	2.29622	2.51844	1.83367	2.44052	1.99478	2.52937
ENSG00000237071	TRIM27	0	0	0	0	0	0	0	0	0	0	0	0	0	0	0	0	0	0
ENSG00000141579	ZNF750	0.061471	0.108743	0	0	0	0.0247778	0.0445522	0.108743	0.0186822	0	0	0.0247778	0.0560026	0.108743	0.0125194	0	0.0218478	0.0247778
ENSG00000141576	RNF157	0.505301	0.612845	0.313333	0.614682	0.337682	0.53653	0.400198	0.612845	0.30896	0.614682	0.293563	0.53653	0.506385	0.612845	0.574951	0.614682	0.548465	0.53653
ENSG00000141577	AZI1	2.67344	2.85058	2.09482	4.31656	2.512	3.46798	3.27946	2.85058	2.04638	4.31656	2.23019	3.46798	2.29527	2.85058	3.07085	4.31656	2.32154	3.46798
ENSG00000141574	SECTM1	2.50168	2.84204	2.28439	1.57447	4.27205	3.40223	1.34081	2.84204	1.2592	1.57447	3.42736	3.40223	1.81806	2.84204	3.90904	1.57447	3.29442	3.40223
ENSG00000141570	CBX8	2.71076	3.35807	1.3375	3.87729	1.87717	3.41355	2.2098	3.35807	1.28689	3.87729	1.68143	3.41355	2.10845	3.35807	2.19362	3.87729	2.17218	3.41355
ENSG00000172538	FAM170B	0	0.0303365	0	0.0136378	0	0	0	0.0303365	0	0.0136378	0	0	0	0.0303365	0	0.0136378	0.0144755	0
ENSG00000172530	BANP	1.74825	1.87352	1.67075	1.68697	1.77453	1.63837	1.96842	1.87352	1.63955	1.68697	1.61984	1.63837	1.81428	1.87352	1.9129	1.68697	1.36011	1.63837
ENSG00000172531	PPP1CA	92.0591	96.8707	134.963	119.848	130.326	92.4922	93.3438	96.8707	114.484	119.848	113.518	92.4922	81.0138	96.8707	85.6905	119.848	81.6221	92.4922
ENSG00000172534	HCFC1	20.4866	22.5795	27.6097	23.7028	28.6615	17.4697	23.1443	22.5795	25.1344	23.7028	25.9398	17.4697	19.7299	22.5795	16.6419	23.7028	15.2349	17.4697
ENSG00000173662	TAS1R1	0.0573977	0	0.0190671	0.0132134	0.0361984	0.00795298	0.0286	0	0.0119929	0.0132134	0.0193163	0.00795298	0.007989	0	0	0.0132134	0	0.00795298
ENSG00000173660	UQCRH	146.468	149.676	157.136	153.924	148.577	120.489	148.049	149.676	147.959	153.924	153.424	120.489	139.314	149.676	141.253	153.924	116.41	120.489
ENSG00000147804	SLC39A4	4.10203	4.7754	6.08062	5.72475	6.3925	2.93841	4.19883	4.7754	5.80586	5.72475	5.24997	2.93841	3.39241	4.7754	4.36861	5.72475	2.24037	2.93841
ENSG00000136653	RASSF5	17.8725	16.8416	17.8001	17.8346	21.0875	17.7101	17.0004	16.8416	17.8109	17.8346	20.4818	17.7101	17.0119	16.8416	18.9733	17.8346	19.7185	17.7101
ENSG00000233795	ZNRD1	0	0	0	0	0	0	0	0	0	0	0	0	0	0	0	0	0	0
ENSG00000137384	TRIM15	0	0	0	0	0	0	0	0	0	0	0	0	0	0	0	0	0	0
ENSG00000162913	C1orf145	0.250334	0.215596	0.302396	0.209559	0.220069	0.233343	0.130406	0.215596	0.380407	0.209559	0.311455	0.233343	0.152043	0.215596	0.044611	0.209559	0.116777	0.233343
ENSG00000162910	MRPL55	9.46149	11.8535	6.05216	12.9673	7.03086	8.96343	9.13288	11.8535	4.70785	12.9673	6.02268	8.96343	8.93051	11.8535	11.4117	12.9673	7.48411	8.96343
ENSG00000122203	KIAA1191	14.383	13.602	13.6432	16.2692	13.6138	16.2152	15.1922	13.602	14.9804	16.2692	13.9059	16.2152	12.689	13.602	17.4976	16.2692	15.6811	16.2152
ENSG00000113303	BTNL8	0.0105756	0.0216623	0.0983673	0.00486915	0.0844814	0.0234455	0	0.0216623	0.0662912	0.00486915	0.0616902	0.0234455	0	0.0216623	0	0.00486915	0	0.0234455
ENSG00000113300	CNOT6	9.68152	8.69583	6.48039	9.31829	6.05607	9.3383	9.18351	8.69583	8.34965	9.31829	8.08905	9.3383	10.1418	8.69583	10.0119	9.31829	9.62587	9.3383
ENSG00000073282	TP63	0.105778	0.0256583	0.0468516	0.107657	0.0538363	0.107996	0.155347	0.0256583	0.0395506	0.107657	0.0499623	0.107996	0.148779	0.0256583	0.227621	0.107657	0.133315	0.107996
ENSG00000177542	SLC25A22	12.0089	12.9592	13.7521	11.9548	9.29464	5.61446	12.3957	12.9592	12.7876	11.9548	8.24999	5.61446	10.333	12.9592	10.5638	11.9548	5.11585	5.61446
ENSG00000089737	DDX24	25.3675	24.7778	14.4212	20.7478	15.2198	19.0486	25.2905	24.7778	15.295	20.7478	15.4064	19.0486	24.5042	24.7778	21.7372	20.7478	18.8217	19.0486
ENSG00000070886	EPHA8	0.0116177	0.0158647	0.0034305	0	0	0	0.00771848	0.0158647	0.113282	0	0.205046	0	0	0.0158647	0	0	0	0
ENSG00000070882	OSBPL3	3.14057	3.62574	2.47117	4.46763	2.63653	4.69087	2.37922	3.62574	2.86032	4.46763	3.27131	4.69087	2.72401	3.62574	5.04731	4.46763	5.1652	4.69087
ENSG00000271116	LAIR2	0	0	0	0	0	0	0	0	0	0	0	0	0	0	0	0	0	0
ENSG00000270249	RP11-514P8.7	22.8675	20.0377	35.3288	23.0495	29.8774	26.0549	27.5326	20.0377	32.0756	23.0495	25.9181	26.0549	22.1405	20.0377	29.4165	23.0495	29.452	26.0549
ENSG00000269000	AC108868.1	0	0	0	0	0	0	0	0	0	0	0	0	0	0	0	0	0	0
ENSG00000264116	RP11-321M21.3	0	0	0	0	0	0	0	0	0	0	0.0260433	0	0	0	0	0	0	0
ENSG00000163993	S100P	3.82565	6.02658	0.100519	0.910547	0.0408929	1.70703	5.10483	6.02658	0.0135483	0.910547	0.072738	1.70703	4.81939	6.02658	0.581058	0.910547	0.998167	1.70703
ENSG00000269007	LAGE3	0	0	0	0	0	0	0	0	0	0	0	0	0	0	0	0	0	0
ENSG00000272101	FO393434.1	0	0	0	0	0	0	0	0	0	0	0	0	0	0	0	0	0	0
ENSG00000145982	FARS2	2.13582	2.40438	1.43073	2.66565	1.57333	2.28924	2.4451	2.40438	1.4974	2.66565	1.42568	2.28924	2.55512	2.40438	1.95746	2.66565	1.90639	2.28924
ENSG00000120280	CXorf21	25.5591	24.9854	4.15175	18.0457	6.33006	18.152	30.2866	24.9854	4.37518	18.0457	6.69551	18.152	37.7887	24.9854	10.174	18.0457	14.2672	18.152
ENSG00000110651	CD81	96.1302	94.427	95.6643	91.3518	93.0289	91.7761	103.395	94.427	89.2584	91.3518	75.6875	91.7761	92.4042	94.427	96.8451	91.3518	106.703	91.7761
ENSG00000144057	ST6GAL2	0	0	0	0.00495759	0	0	0.0160959	0	0	0.00495759	0	0	0	0	0	0.00495759	0.00263106	0
ENSG00000023697	DERA	2.70294	3.08912	2.02652	3.40134	2.49339	3.00422	2.56294	3.08912	2.33822	3.40134	2.66761	3.00422	2.91236	3.08912	3.04403	3.40134	2.87683	3.00422
ENSG00000117153	KLHL12	10.6258	10.069	6.01304	8.76255	7.97227	9.83588	8.89518	10.069	6.34206	8.76255	8.27248	9.83588	11.1358	10.069	9.08885	8.76255	9.5349	9.83588
ENSG00000117152	RGS4	0.0214529	0.0439428	0.0342071	0.0079018	0.10102	0.028536	0.0171032	0.0439428	0.0179299	0.0079018	0.0693087	0.028536	0.00955508	0.0439428	0.0576733	0.0079018	0.0419359	0.028536
ENSG00000117151	CTBS	4.69766	4.86632	3.55216	3.72824	4.25944	4.83932	3.92756	4.86632	3.98119	3.72824	4.90279	4.83932	4.95113	4.86632	4.73622	3.72824	5.53841	4.83932
ENSG00000117155	SSX2IP	1.21603	1.29946	0.733016	1.32737	0.740178	1.16183	0.870041	1.29946	0.994281	1.32737	1.03533	1.16183	1.09231	1.29946	1.23855	1.32737	1.14634	1.16183
ENSG00000117154	IGSF21	0	0	0	0	0	0	0.00670269	0	0	0	0	0	0	0	0	0	0	0
ENSG00000269733	PGPEP1L	0	0	0	0	0	0	0	0	0	0	0	0	0	0	0	0	0	0
ENSG00000269730	AL662847.1	0	0	0	0	0	0	0	0	0	0	0	0	0	0	0	0	0	0
ENSG00000269738	AL162424.1	85.6205	87.6898	41.198	70.9358	32.6892	114.471	75.3433	87.6898	41.4608	70.9358	34.0314	114.471	69.8437	87.6898	53.4306	70.9358	138.698	114.471
ENSG00000171984	C20orf196	1.31664	1.311	0.19439	0.83072	0.317789	1.36487	0.996228	1.311	0.193592	0.83072	0.328219	1.36487	1.31675	1.311	0.914944	0.83072	0.714931	1.36487
ENSG00000262617	AC020766.1	0	0	0	0	0	0	0	0	0	0	0	0	0	0	0	0	0	0
ENSG00000171987	C11orf40	0	0	0	0	0	0	0	0	0	0	0	0	0	0	0	0	0	0
ENSG00000262611	OR8H1	0	0	0	0	0	0	0	0	0	0	0	0	0	0	0	0	0	0
ENSG00000262610	LILRA5	0	0	0	0	0	0	0	0	0	0	0	0	0	0	0	0	0	0
ENSG00000262612	TAS2R43	0	0	0	0	0	0	0	0	0	0	0	0	0	0	0	0	0	0
ENSG00000171988	JMJD1C	10.4104	10.0144	8.22678	10.5462	9.38684	13.3106	7.73402	10.0144	9.55796	10.5462	11.0398	13.3106	11.9586	10.0144	15.3586	10.5462	18.6874	13.3106
ENSG00000171989	LDHAL6B	0.623476	0.229876	0.806362	0.516704	0.566209	0.511419	0.608902	0.229876	0.666992	0.516704	0.884047	0.511419	0.555389	0.229876	0.628548	0.516704	1.13345	0.511419
ENSG00000103319	EEF2K	5.99924	6.532	2.56178	6.25464	4.08127	4.83373	4.60266	6.532	2.73071	6.25464	3.54726	4.83373	4.87743	6.532	4.59216	6.25464	3.89526	4.83373
ENSG00000103310	ZP2	0.0420878	0.00615785	0	0	0	0	0.00599183	0.00615785	0.00502515	0	0	0	0	0.00615785	0	0	0	0
ENSG00000103313	MEFV	3.67709	4.14519	0.877266	2.69609	1.33238	4.243	4.54834	4.14519	0.816889	2.69609	1.16308	4.243	4.73686	4.14519	1.84241	2.69609	2.87012	4.243
ENSG00000122490	PQLC1	11.8737	12.787	12.8752	15.3401	15.5743	12.0304	12.5254	12.787	10.7834	15.3401	13.7492	12.0304	10.3427	12.787	12.0237	15.3401	10.3711	12.0304
ENSG00000103316	CRYM	0.0219453	0.0280946	0.0729005	0.0151559	0.0507467	0.00608145	0.0109349	0.0280946	0.0504388	0.0151559	0.0787771	0.00608145	0.0244359	0.0280946	0	0.0151559	0.0160869	0.00608145
ENSG00000083812	ZNF324	5.16681	5.0621	4.79011	5.09508	4.26191	4.44243	5.47594	5.0621	4.00758	5.09508	3.58189	4.44243	4.79739	5.0621	4.31162	5.09508	3.4789	4.44243
ENSG00000102043	MTMR8	0.326503	0.306528	0.154257	0.33573	0.132699	0.295568	0.352493	0.306528	0.113702	0.33573	0.0879037	0.295568	0.248432	0.306528	0.243822	0.33573	0.16488	0.295568
ENSG00000083817	ZNF416	2.21995	1.79233	1.83735	1.66371	1.9689	2.19133	1.63097	1.79233	1.98405	1.66371	2.3049	2.19133	1.92159	1.79233	1.79695	1.66371	2.54988	2.19133
ENSG00000102048	ASB9	0	0	0	0.0161714	0	0	0	0	0	0.0161714	0.00788021	0	0	0	0	0.0161714	0	0
ENSG00000269881	ITFG3	12.0127	12.2083	13.724	14.4876	14.3192	12.3515	11.8146	12.2083	12.1903	14.4876	12.3503	12.3515	10.5628	12.2083	11.9011	14.4876	11.0175	12.3515
ENSG00000269883	AC007375.1	0	0	0	0	0	0	0	0	0	0	0	0	0	0	0	0	0	0
ENSG00000269882	C1S	0	0	0	0	0	0	0	0	0	0	0	0	0	0	0	0	0	0
ENSG00000269884	BRCC3	0	0	0	0	0	0	0	0	0	0	0	0	0	0	0	0	0	0
ENSG00000175155	YPEL2	1.54895	1.34855	4.15457	1.8033	3.07603	3.2243	1.22153	1.34855	5.25236	1.8033	3.66102	3.2243	1.3782	1.34855	1.78333	1.8033	4.16275	3.2243
ENSG00000139351	SYCP3	0.178826	0.155398	0.0336026	0.0598795	0.00455671	0.0480544	0.140408	0.155398	0.0588778	0.0598795	0.0389051	0.0480544	0.156884	0.155398	0.0424905	0.0598795	0.0317789	0.0480544
ENSG00000139350	NEDD1	2.40541	2.53198	0.906056	2.37116	1.01998	1.79465	2.39713	2.53198	1.01379	2.37116	1.19466	1.79465	2.91878	2.53198	2.752	2.37116	2.18024	1.79465
ENSG00000139352	ASCL1	0	0	0	0.0154584	0	0.00930422	0	0	0	0.0154584	0.030131	0.00930422	0	0	0	0.0154584	0.0164079	0.00930422
ENSG00000139354	GAS2L3	3.10093	2.58575	3.18601	2.61581	3.23529	3.17289	2.47282	2.58575	3.74902	2.61581	4.46202	3.17289	2.66985	2.58575	4.00789	2.61581	5.48941	3.17289
ENSG00000131165	CHMP1A	33.3748	33.711	41.5856	35.4138	42.0255	24.2619	34.362	33.711	34.9268	35.4138	34.2525	24.2619	29.8669	33.711	25.539	35.4138	21.2348	24.2619
ENSG00000064607	SUGP2	15.4146	14.9502	9.2995	15.2699	10.1973	14.2978	16.5337	14.9502	9.94734	15.2699	10.1978	14.2978	15.9468	14.9502	14.3074	15.2699	13.1544	14.2978
ENSG00000064601	CTSA	47.1323	49.9733	52.0439	51.0552	61.7996	59.8566	48.9156	49.9733	44.4591	51.0552	51.6178	59.8566	44.1015	49.9733	48.6517	51.0552	58.1567	59.8566
ENSG00000143919	CAMKMT	0.467911	0.378051	0.713856	0.718112	0.607672	0.587823	0.37304	0.378051	0.690891	0.718112	0.671865	0.587823	0.463126	0.378051	1.01332	0.718112	0.650431	0.587823
ENSG00000102595	UGGT2	1.28224	1.20555	0.813282	1.00362	0.59733	0.943766	1.00693	1.20555	0.887344	1.00362	0.890657	0.943766	1.47631	1.20555	1.40758	1.00362	1.33848	0.943766
ENSG00000111218	PRMT8	0	0	0	0	0	0	0	0	0	0	0	0	0	0	0.00349824	0	0	0
ENSG00000180745	CLRN3	0.0180115	0.0184468	0	0	0	0	0.0179495	0.0184468	0.0301073	0	0	0	0	0.0184468	0	0	0.0352087	0
ENSG00000111215	PRR4	0.627293	0.823426	0.387414	0.618309	0.397466	0.58761	0.589914	0.823426	0.45782	0.618309	0.360763	0.58761	0.673893	0.823426	0.648232	0.618309	0.466311	0.58761
ENSG00000142065	ZFP14	0.524773	0.480882	0.318068	0.540452	0.557395	0.74243	0.48512	0.480882	0.435709	0.540452	0.64755	0.74243	0.553578	0.480882	0.618764	0.540452	1.0022	0.74243
ENSG00000188511	C22orf34	0.442323	0.364928	0.41904	0.234766	0.547579	0.463065	0.462228	0.364928	0.341445	0.234766	0.496191	0.463065	0.495945	0.364928	0.416332	0.234766	0.375282	0.463065
ENSG00000188517	COL25A1	0.0167793	0.00687392	0.00594554	0.00618035	0	0.0185994	0	0.00687392	0	0.00618035	0	0.0185994	0.00747345	0.00687392	0	0.00618035	0.01312	0.0185994
ENSG00000170677	SOCS6	4.61519	4.7871	4.1037	4.21468	3.94788	5.62317	3.99112	4.7871	4.32096	4.21468	4.98197	5.62317	4.54825	4.7871	6.4631	4.21468	6.7002	5.62317
ENSG00000263560	AC241377.1	0	0	0	0	0	0	0	0	0	0	0	0	0	0	0	0	0	0
ENSG00000263563	UBBP4	3.02078	0.862202	3.07075	1.48201	2.7379	3.22494	3.50388	0.862202	2.46262	1.48201	3.78863	3.22494	1.92994	0.862202	1.63639	1.48201	1.65775	3.22494
ENSG00000213953	AC018867.1	0	0	0	0.335203	0	0	0.362768	0	0	0.335203	0	0	0.405337	0	0	0.335203	0.355793	0
ENSG00000109610	SOD3	0.00975059	0.039945	0.017275	0	0.0409954	0	0.019434	0.039945	0	0	0.0175009	0	0.0868578	0.039945	0.0218443	0	0.0190604	0
ENSG00000109618	SEPSECS	2.92981	3.0106	2.92373	3.40451	3.22649	4.32895	2.34614	3.0106	3.3428	3.40451	3.81699	4.32895	3.07042	3.0106	4.89178	3.40451	5.72397	4.32895
ENSG00000118271	TTR	0.0300714	0.0102661	0.0266386	0	0.0168576	0	0	0.0102661	0.025133	0	0	0	0.0223229	0.0102661	0	0	0.00979721	0
ENSG00000118276	B4GALT6	1.80275	1.69013	0.526547	1.29274	0.700404	1.68187	1.53154	1.69013	0.853036	1.29274	0.83524	1.68187	1.90285	1.69013	1.49809	1.29274	2.33532	1.68187
ENSG00000149328	GLB1L2	0	0.00291906	0	0	0	0	0.00284036	0.00291906	0	0	0	0	0	0.00291906	0	0	0	0
ENSG00000141744	PNMT	0.0284822	0	0.0126154	0.0131136	0.0239501	0	0	0	0	0.0131136	0.0255607	0	0	0	0	0.0131136	0	0
ENSG00000219626	FAM228B	1.07229	1.09821	0.347792	0.575335	0.457934	1.22604	0.816174	1.09821	0.395174	0.575335	0.522826	1.22604	1.08587	1.09821	0.680955	0.575335	1.03155	1.22604
ENSG00000141741	MIEN1	13.4979	15.4281	21.2195	14.7467	19.5563	14.079	14.8227	15.4281	17.1829	14.7467	18.6372	14.079	13.8101	15.4281	11.753	14.7467	15.4137	14.079
ENSG00000214456	PLIN5	0.0301651	0.0220672	0.0190869	0.0158725	0.0326124	0.0812047	0.0730057	0.0220672	0.0108049	0.0158725	0.0270709	0.0812047	0.0335886	0.0220672	0.0193083	0.0158725	0.0210594	0.0812047
ENSG00000197887	OR1S2	0.0423454	0.0433688	0	0.038993	0	0	0	0.0433688	0	0.038993	0.0380019	0	0	0.0433688	0	0.038993	0.0413882	0
ENSG00000105063	PPP6R1	36.0898	41.6783	63.0855	69.9539	52.7007	47.2474	35.7613	41.6783	54.3014	69.9539	47.2496	47.2474	32.4329	41.6783	48.3629	69.9539	38.6196	47.2474
ENSG00000070413	DGCR2	12.7069	14.1874	12.7607	13.8451	14.9627	12.9221	12.556	14.1874	11.1222	13.8451	12.6646	12.9221	11.1805	14.1874	10.3295	13.8451	10.6511	12.9221
ENSG00000152910	CNTNAP4	0.00773217	0.00395952	0	0	0	0.00428545	0.00385277	0.00395952	0	0	0	0.00428545	0	0.00395952	0	0	0.00377869	0.00428545
ENSG00000175482	POLD4	16.4075	19.4525	16.9579	19.2068	18.4262	22.0646	15.822	19.4525	15.0269	19.2068	15.1337	22.0646	14.9128	19.4525	17.6471	19.2068	21.3045	22.0646
ENSG00000146360	GPR6	0	0	0	0	0	0	0	0	0	0	0.00985235	0	0	0	0.0122975	0	0	0
ENSG00000187513	GJA4	0.0362538	0	0	0.0333836	0.0406468	0.0267909	0.024086	0	0	0.0333836	0.0216901	0.0267909	0.0941929	0	0.0406098	0.0333836	0.0708686	0.0267909
ENSG00000133477	FAM83F	0	0.00129665	0	0.00116582	0	0.00280676	0.00378506	0.00129665	0	0.00116582	0.00227237	0.00280676	0	0.00129665	0.00283633	0.00116582	0	0.00280676
ENSG00000133475	GGT2	0.0696869	0.124899	0.0617318	0.0962547	0.146496	0.0386231	0.0868086	0.124899	0.0655231	0.0962547	0.0469041	0.0386231	0.0581969	0.124899	0.0975748	0.0962547	0.0851395	0.0386231
ENSG00000164512	ANKRD55	0.0906081	0.0571064	0.00617421	0.160451	0	0.177696	0.0416751	0.0571064	0.0116505	0.160451	0.00625493	0.177696	0.147457	0.0571064	0.0858803	0.160451	0.0885599	0.177696
ENSG00000197665	AC007952.6	0.0285803	0.0146355	0	0.0263176	0	0.063361	0.0569636	0.0146355	0	0.0263176	0	0.063361	0	0.0146355	0	0.0263176	0.0139671	0.063361
ENSG00000172273	HINFP	2.86109	2.97346	2.84663	3.39815	3.23085	3.13169	2.94376	2.97346	2.93438	3.39815	2.95579	3.13169	2.76996	2.97346	2.7818	3.39815	3.15319	3.13169
ENSG00000172270	BSG	170.199	179.949	205.059	230.201	224.075	223.515	183.27	179.949	175.58	230.201	180.579	223.515	147.248	179.949	162.456	230.201	186.648	223.515
ENSG00000118898	PPL	0.0485931	0.0442378	1.09289	0.0248589	0.633345	0.0448869	0.0376645	0.0442378	0.830312	0.0248589	0.726812	0.0448869	0.0420841	0.0442378	0.0120959	0.0248589	0.0870735	0.0448869
ENSG00000118894	FAM86A	11.7146	11.3795	4.11919	7.09166	4.97547	4.67648	11.2842	11.3795	5.26685	7.09166	4.66714	4.67648	10.5697	11.3795	8.23289	7.09166	3.31952	4.67648
ENSG00000186377	CYP4X1	0.0211655	0	0	0.0194899	0	0	0	0	0	0.0194899	0	0	0	0	0	0.0194899	0.00689569	0
ENSG00000186376	ZNF75D	1.85614	1.80751	1.05394	1.8605	1.34586	2.22614	1.49193	1.80751	1.44197	1.8605	1.61387	2.22614	2.05664	1.80751	2.23595	1.8605	2.37331	2.22614
ENSG00000205707	LYRM5	2.96178	2.98165	2.31808	2.64981	3.2051	4.06651	2.5407	2.98165	2.60197	2.64981	3.8586	4.06651	3.38224	2.98165	3.31764	2.64981	4.0544	4.06651
ENSG00000115446	UNC50	13.6964	13.7701	11.4323	12.3978	12.9175	14.3879	13.3432	13.7701	11.3227	12.3978	14.5627	14.3879	16.1211	13.7701	12.9344	12.3978	15.8331	14.3879
ENSG00000113845	TIMMDC1	19.746	19.2191	15.9097	21.4931	20.4387	23.2022	18.7994	19.2191	15.6267	21.4931	21.5812	23.2022	20.4383	19.2191	24.281	21.4931	25.0271	23.2022
ENSG00000108255	CRYBA1	0.0522652	0.0535283	0.0231494	0	0.0439487	0.0289673	0.0520851	0.0535283	0.0873642	0	0.140712	0.0289673	0.145492	0.0535283	0.0878173	0	0.0510837	0.0289673
ENSG00000108256	NUFIP2	25.3275	22.091	12.1177	17.4372	11.5363	23.4367	22.9724	22.091	15.3615	17.4372	15.4854	23.4367	26.7497	22.091	20.6482	17.4372	25.1531	23.4367
ENSG00000104731	KLHDC4	3.73956	4.20214	1.84968	3.2831	1.78653	2.95337	3.96884	4.20214	1.72897	3.2831	1.65193	2.95337	3.77846	4.20214	2.67134	3.2831	2.04084	2.95337
ENSG00000104738	MCM4	48.9207	46.7304	7.84086	32.4005	6.74229	17.9241	46.3402	46.7304	8.53366	32.4005	8.00067	17.9241	43.6657	46.7304	23.5829	32.4005	11.9114	17.9241
ENSG00000223367	RPS18	0	0	0	0	0	0	0	0	0	0	0	0	0	0	0	0	0	0
ENSG00000260130	MYOM2	0	0	0	0	0	0	0	0	0	0	0	0	0	0	0	0	0	0
ENSG00000196455	PIK3R4	5.16416	4.76719	2.83437	4.15823	2.90794	4.26972	5.02329	4.76719	2.82901	4.15823	3.43254	4.26972	6.11986	4.76719	4.79459	4.15823	4.34953	4.26972
ENSG00000196456	ZNF775	1.13765	1.12188	1.95408	1.35046	1.65189	1.20419	1.35627	1.12188	1.67466	1.35046	1.32697	1.20419	1.2298	1.12188	1.2304	1.35046	1.50126	1.20419
ENSG00000125207	PIWIL1	0.00392979	0	0	0	0	0	0.0078325	0	0	0	0	0	0	0	0	0	0	0
ENSG00000196453	ZNF777	7.7914	7.61162	4.09343	6.08715	6.00116	5.91185	8.21228	7.61162	4.20537	6.08715	5.20672	5.91185	7.33217	7.61162	5.04674	6.08715	4.42865	5.91185
ENSG00000196459	TRAPPC2	2.2866	2.27575	1.65236	2.39027	1.74848	2.5271	1.89273	2.27575	1.60441	2.39027	1.96058	2.5271	2.27372	2.27575	2.11986	2.39027	2.36774	2.5271
ENSG00000196458	ZNF605	2.21534	2.0315	1.27726	1.95557	1.53876	2.87986	1.90959	2.0315	1.90559	1.95557	1.9615	2.87986	3.01594	2.0315	2.54189	1.95557	3.25843	2.87986
ENSG00000197324	LRP10	42.5313	47.9098	96.1055	98.3698	103.952	89.2674	42.8239	47.9098	82.5149	98.3698	86.9937	89.2674	38.7885	47.9098	73.2793	98.3698	88.6575	89.2674
ENSG00000104880	ARHGEF18	12.4629	14.4444	8.70538	12.7755	9.47797	10.2366	11.7931	14.4444	7.43736	12.7755	8.73855	10.2366	10.5275	14.4444	9.2932	12.7755	8.36579	10.2366
ENSG00000104883	PEX11G	1.03322	1.62352	0.61436	1.94194	0.666485	1.96112	1.05787	1.62352	0.366709	1.94194	0.60969	1.96112	0.772241	1.62352	1.52201	1.94194	1.49404	1.96112
ENSG00000124155	PIGT	39.6122	42.4171	26.995	45.1694	32.5468	44.5181	42.7609	42.4171	25.9974	45.1694	25.7373	44.5181	37.7049	42.4171	36.2584	45.1694	39.8713	44.5181
ENSG00000197321	SVIL	1.3263	1.13641	4.69247	1.01436	5.33839	1.81047	1.87362	1.13641	5.32445	1.01436	6.34203	1.81047	1.92814	1.13641	0.881055	1.01436	1.75719	1.81047
ENSG00000197322	C17orf102	0.0103824	0	0	0	0	0	0	0	0	0	0	0	0	0	0	0	0	0
ENSG00000197323	TRIM33	8.77737	8.53892	7.42022	6.43205	5.95377	7.30552	7.28928	8.53892	8.60206	6.43205	8.0268	7.30552	9.43328	8.53892	8.11806	6.43205	8.40526	7.30552
ENSG00000104889	RNASEH2A	22.8354	22.7619	4.83179	25.6097	4.86891	13.1525	22.635	22.7619	4.37159	25.6097	5.1598	13.1525	20.2714	22.7619	15.6735	25.6097	9.42896	13.1525
ENSG00000104888	SLC17A7	0.314017	0.371084	2.63192	0.397193	2.89004	0.833861	0.271669	0.371084	2.25244	0.397193	2.55484	0.833861	0.37271	0.371084	0.405861	0.397193	1.16359	0.833861
ENSG00000197329	PELI1	1.97684	1.94219	2.25024	1.8157	2.01758	2.85479	3.04778	1.94219	2.55607	1.8157	2.52342	2.85479	3.56785	1.94219	2.29888	1.8157	4.10521	2.85479
ENSG00000169836	TACR3	0.00799586	0	0	0.00736283	0	0	0.00796833	0	0	0.00736283	0	0	0	0	0	0.00736283	0	0
ENSG00000226850	ATP6V1G2	0	0	0	0	0	0	0	0	0	0	0	0	0	0	0	0	0	0
ENSG00000140030	GPR65	8.37638	8.82869	2.49055	6.66483	3.4485	7.98433	6.51826	8.82869	2.72847	6.66483	5.06706	7.98433	8.09811	8.82869	11.9205	6.66483	9.86759	7.98433
ENSG00000019144	PHLDB1	1.57403	1.78797	2.63906	2.26015	2.04804	1.67992	1.63632	1.78797	2.57587	2.26015	2.00792	1.67992	1.51625	1.78797	2.12783	2.26015	1.79393	1.67992
ENSG00000076513	ANKRD13A	7.21284	6.6788	4.80898	7.15651	4.65745	6.35239	6.97419	6.6788	5.10816	7.15651	5.3912	6.35239	7.34304	6.6788	6.6375	7.15651	5.50463	6.35239
ENSG00000185055	EFCAB10	1.80288	1.66511	0.805668	1.28958	0.852755	1.41854	1.51594	1.66511	0.894669	1.28958	1.12679	1.41854	2.13297	1.66511	1.97443	1.28958	1.62053	1.41854
ENSG00000185056	C5orf47	0	0	0	0	0.0189786	0.00833939	0	0	0.0125756	0	0	0.00833939	0	0	0	0	0.0294129	0.00833939
ENSG00000107282	APBA1	0.914568	0.939924	1.05772	1.05855	1.22566	0.960975	1.01269	0.939924	1.18372	1.05855	1.07154	0.960975	0.972398	0.939924	0.875055	1.05855	0.561788	0.960975
ENSG00000185053	SGCZ	0	0	0	0	0	0	0	0	0	0	0	0	0	0	0	0	0	0
ENSG00000107281	NPDC1	14.1083	17.3376	12.4575	25.2427	16.6253	26.9496	12.9038	17.3376	11.3922	25.2427	13.9538	26.9496	12.8901	17.3376	19.2172	25.2427	23.007	26.9496
ENSG00000218823	PAPOLB	0.0194737	0.00997219	0	0	0	0	0.0242583	0.00997219	0.00813786	0	0	0	0.0216839	0.00997219	0	0	0.00951676	0
ENSG00000152284	TCF7L1	0.517086	0.606614	0.287328	0.675266	0.233215	0.96919	0.384137	0.606614	0.400739	0.675266	0.341707	0.96919	0.423978	0.606614	0.284342	0.675266	0.895932	0.96919
ENSG00000106771	TMEM245	8.32027	7.92981	3.24239	6.44675	4.37111	6.15501	7.69204	7.92981	3.60952	6.44675	5.58981	6.15501	8.68965	7.92981	6.71243	6.44675	6.04301	6.15501
ENSG00000106772	PRUNE2	0.0252339	0.0445087	0.0149022	0.103272	0.012967	0.163165	0.0237499	0.0445087	0.00468665	0.103272	0.0125809	0.163165	0.0202928	0.0445087	0.158602	0.103272	0.1425	0.163165
ENSG00000103056	SMPD3	0.0811084	0.157237	0.0769816	0.0826893	0.0755098	0.138071	0.11547	0.157237	0.0653676	0.0826893	0.0623904	0.138071	0.103216	0.157237	0.0940985	0.0826893	0.0764437	0.138071
ENSG00000151532	VTI1A	4.62959	4.24105	5.18978	4.26762	4.42831	3.82148	4.70218	4.24105	5.83697	4.26762	5.38386	3.82148	5.00939	4.24105	4.64957	4.26762	4.05942	3.82148
ENSG00000103051	COG4	7.29216	6.79793	7.03964	9.72893	9.33991	9.00586	7.75526	6.79793	6.62727	9.72893	8.52065	9.00586	7.11566	6.79793	8.24117	9.72893	7.72055	9.00586
ENSG00000179242	CDH4	0.0586399	0.0410917	0.019138	0.0426295	0.0622852	0.0307899	0.0276811	0.0410917	0.0128974	0.0426295	0.0664737	0.0307899	0.00687318	0.0410917	0.00345714	0.0426295	0.0180993	0.0307899
ENSG00000152133	GPATCH11	8.60273	8.92636	3.20751	7.41561	3.67091	7.09927	7.11439	8.92636	4.4213	7.41561	4.71976	7.09927	9.00148	8.92636	6.62176	7.41561	6.84708	7.09927
ENSG00000152137	HSPB8	0	0	0	0	0	0	0	0	0	0	0	0	0	0	0	0	0	0
ENSG00000102908	NFAT5	4.51649	3.5243	4.33151	3.33412	3.83399	4.14115	5.18174	3.5243	5.69918	3.33412	6.13545	4.14115	6.27015	3.5243	5.76204	3.33412	5.72634	4.14115
ENSG00000267368	UPK3BL	16.8839	16.6744	11.053	20.8578	12.2211	26.085	20.231	16.6744	9.485	20.8578	11.6277	26.085	17.7844	16.6744	21.5104	20.8578	20.3104	26.085
ENSG00000106483	SFRP4	0	0.0118158	0	0.079677	0.024253	0.0319711	0.045989	0.0118158	0	0.079677	0	0.0319711	0	0.0118158	0	0.079677	0.0225524	0.0319711
ENSG00000102900	NUP93	8.32141	7.78885	3.7883	8.07573	3.7755	5.39007	8.66413	7.78885	3.73748	8.07573	3.73068	5.39007	7.92028	7.78885	7.0882	8.07573	3.80851	5.39007
ENSG00000102901	CENPT	4.87359	5.6551	5.93662	6.0814	6.08257	5.63478	5.15918	5.6551	5.34436	6.0814	5.83942	5.63478	4.5591	5.6551	4.9808	6.0814	5.57258	5.63478
ENSG00000102904	TSNAXIP1	0.754127	0.722702	0.911397	0.778746	1.0282	0.812047	0.58512	0.722702	0.80136	0.778746	0.981321	0.812047	0.659777	0.722702	0.537011	0.778746	0.831847	0.812047
ENSG00000106484	MEST	0.318598	0.211404	0.0357755	0.157018	0.0113198	0.189014	0.299614	0.211404	0.0150015	0.157018	0.00805404	0.189014	0.229843	0.211404	0.0804233	0.157018	0.131576	0.189014
ENSG00000018236	CNTN1	0.0138476	0.00567291	0.00490674	0.0127513	0.00931534	0.0214896	0.0248399	0.00567291	0.00462941	0.0127513	0.00248544	0.0214896	0.0154192	0.00567291	0.00620457	0.0127513	0.0135346	0.0214896
ENSG00000130449	ZSWIM6	6.74417	6.76037	5.20245	5.17867	5.52514	7.65135	6.28491	6.76037	5.29617	5.17867	6.90203	7.65135	6.9594	6.76037	6.9503	5.17867	9.09863	7.65135
ENSG00000178802	MPI	4.06919	4.6444	2.42248	5.27483	3.52096	4.9104	3.66632	4.6444	2.23624	5.27483	2.92203	4.9104	3.65841	4.6444	5.67101	5.27483	5.00275	4.9104
ENSG00000143079	CTTNBP2NL	3.56751	3.11126	11.2806	5.63081	10.1589	6.73164	3.26756	3.11126	13.2406	5.63081	12.253	6.73164	3.53241	3.11126	9.04705	5.63081	10.1839	6.73164
ENSG00000178804	H1FOO	0	0	0	0	0	0	0	0	0	0	0	0	0	0	0	0	0.0481334	0
ENSG00000266265	KLF14	0	0	0	0	0	0	0	0	0	0	0	0	0	0	0	0	0	0
ENSG00000251369	ZNF550	1.31035	1.70574	0.687059	1.27803	0.7277	1.80543	1.21634	1.70574	0.736932	1.27803	0.875547	1.80543	1.80452	1.70574	1.14314	1.27803	1.75951	1.80543
ENSG00000178809	TRIM73	0.834612	0.896947	0.28181	0.637574	0.182533	1.22385	0.966009	0.896947	0.294035	0.637574	0.278777	1.22385	0.787643	0.896947	0.708505	0.637574	0.896222	1.22385
ENSG00000247270	AC132186.1	0.0418754	0.0214437	0.0185476	0.0578402	0.0234748	0.108308	0.0973728	0.0214437	0.0524978	0.0578402	0.0751602	0.108308	0.0388567	0.0214437	0.078178	0.0578402	0.0818576	0.108308
ENSG00000092020	PPP2R3C	5.70967	5.30856	5.00555	4.75315	5.46057	5.10252	5.83989	5.30856	5.85841	4.75315	5.71209	5.10252	7.2309	5.30856	6.38968	4.75315	5.17636	5.10252
ENSG00000185942	NKAIN3	0	0	0	0	0	0	0	0	0.00593084	0	0	0	0.0158031	0	0	0	0	0
ENSG00000185940	KRTAP5-5	0	0	0	0	0	0	0	0	0	0	0	0	0	0	0	0	0	0
ENSG00000185947	ZNF267	5.42113	5.01441	8.96212	4.74416	7.64627	5.43809	4.90211	5.01441	10.6689	4.74416	8.36661	5.43809	8.04243	5.01441	7.41416	4.74416	7.96391	5.43809
ENSG00000185946	RNPC3	3.48692	3.30815	1.37848	2.94375	1.35424	4.10631	2.86966	3.30815	1.39401	2.94375	1.81681	4.10631	4.16864	3.30815	4.16988	2.94375	4.9379	4.10631
ENSG00000185945	NXF2B	0.0130417	0.00890456	0	0	0	0.0289127	0.00433224	0.00890456	0	0	0	0.0289127	0	0.00890456	0	0	0.0297426	0.0289127
ENSG00000204628	GNB2L1	212.132	231.476	94.1583	162.196	77.0087	198.811	224.641	231.476	89.4144	162.196	65.6922	198.811	212.097	231.476	143.623	162.196	162.258	198.811
ENSG00000204620	AC115618.1	17.0829	20.694	15.891	14.1329	11.1649	15.0898	19.1909	20.694	11.5032	14.1329	12.0611	15.0898	17.8755	20.694	13.7459	14.1329	11.4401	15.0898
ENSG00000204624	PTCHD2	0.0202564	0.0138306	0.008972	0.0217615	0.0255497	0.0224537	0.0168222	0.0138306	0.00564328	0.0217615	0.0151488	0.0224537	0.0225553	0.0138306	0.0037817	0.0217615	0.013199	0.0224537
ENSG00000153666	GOLGA8I	2.83025	2.97836	0.0219377	2.57686	0.0416482	3.73334	2.32691	2.97836	0.0473092	2.57686	0.0603236	3.73334	2.97026	2.97836	1.22453	2.57686	2.21647	3.73334
ENSG00000114450	GNB4	9.98843	9.68799	3.72112	8.53511	3.61676	7.75855	9.54806	9.68799	4.55874	8.53511	4.92349	7.75855	10.639	9.68799	10.6967	8.53511	7.29612	7.75855
ENSG00000114455	HHLA2	0.0231318	0.06515	0	0.0958523	0	0.115385	0.0633935	0.06515	0	0.0958523	0.0103796	0.115385	0.0257572	0.06515	0.032389	0.0958523	0.0226089	0.115385
ENSG00000204193	TXNDC8	0	0	0.00876939	0	0	0.0109733	0.0197307	0	0	0	0	0.0109733	0	0	0	0	0	0.0109733
ENSG00000204197	KIFC1	0	0	0	0	0	0	0	0	0	0	0	0	0	0	0	0	0	0
ENSG00000204195	AWAT1	0.028939	0.0148192	0	0	0	0	0	0.0148192	0	0	0	0	0	0.0148192	0.0486241	0	0.0141424	0
ENSG00000142303	ADAMTS10	0.249468	0.281418	0.080069	0.326266	0.109447	0.420806	0.313464	0.281418	0.0936741	0.326266	0.139519	0.420806	0.289859	0.281418	0.255143	0.326266	0.416983	0.420806
ENSG00000233803	TSPY4	0	0	0	0	0	0.0117407	0	0	0	0	0	0.0117407	0	0	0	0	0	0.0117407
ENSG00000233801	NELFE	0	0	0	0	0	0	0	0	0	0	0	0	0	0	0	0	0	0
ENSG00000163518	FCRL4	0	0	0	0	0	0	0	0	0	0	0	0	0	0	0	0	0.00523361	0
ENSG00000163519	TRAT1	0	0	0	0	0	0	0.0245385	0	0	0	0	0	0	0	0	0	0.00802224	0
ENSG00000183475	ASB7	3.4832	3.21694	2.89145	3.77387	3.16172	4.30851	3.45205	3.21694	2.90476	3.77387	4.07818	4.30851	3.6602	3.21694	4.37112	3.77387	4.90754	4.30851
ENSG00000183474	GTF2H2C	7.49931	7.31872	2.56156	5.56056	3.34773	6.05524	6.07997	7.31872	2.88327	5.56056	3.76468	6.05524	7.14382	7.31872	7.19983	5.56056	5.34499	6.05524
ENSG00000163516	ANKZF1	2.7738	2.42062	1.50794	4.32154	1.91043	6.06293	2.49053	2.42062	1.53041	4.32154	1.79545	6.06293	2.72614	2.42062	3.73761	4.32154	5.82654	6.06293
ENSG00000163517	HDAC11	0.334475	0.342559	0.400867	0.612366	0.84376	0.763324	0.313716	0.342559	0.335457	0.612366	0.695681	0.763324	0.24537	0.342559	0.352624	0.612366	0.561523	0.763324
ENSG00000163510	CWC22	6.03524	6.05978	5.37943	5.36224	5.725	5.21094	5.38692	6.05978	6.31037	5.36224	6.17714	5.21094	8.07397	6.05978	7.9686	5.36224	6.61788	5.21094
ENSG00000183470	AC009365.3	0	0	0	0	0	0	0	0	0	0	0	0	0	0	0	0	0	0
ENSG00000163512	AZI2	4.69301	4.54536	4.7305	3.74969	4.27878	4.88329	4.38373	4.54536	5.15419	3.74969	4.95072	4.88329	5.97528	4.54536	5.50216	3.74969	5.20341	4.88329
ENSG00000163513	TGFBR2	19.5495	18.9151	11.7302	19.988	14.7214	24.1148	16.8403	18.9151	12.5676	19.988	17.085	24.1148	16.7731	18.9151	18.9239	19.988	22.0737	24.1148
ENSG00000205572	SERF1B	0.795695	1.79701	2.15073	1.57812	2.2074	1.68109	2.06033	1.79701	2.28496	1.57812	2.77086	1.68109	2.2718	1.79701	1.84354	1.57812	1.356	1.68109
ENSG00000205571	SMN2	15.011	15.1879	7.83915	10.4195	6.50331	7.81316	14.8387	15.1879	5.27891	10.4195	8.46022	7.81316	15.7495	15.1879	12.3512	10.4195	7.70359	7.81316
ENSG00000187545	PRAMEF10	0	0.0139349	0	0	0	0	0.0135592	0.0139349	0	0	0	0	0	0.0139349	0	0	0	0
ENSG00000127540	UQCR11	32.7844	33.5867	55.9224	42.2787	59.0679	29.7831	38.5285	33.5867	55.497	42.2787	51.8918	29.7831	27.0286	33.5867	37.9599	42.2787	28.0213	29.7831
ENSG00000106070	GRB10	1.23945	1.40404	1.00739	2.19234	1.25453	5.76157	1.04803	1.40404	1.21204	2.19234	1.54113	5.76157	1.17798	1.40404	1.9727	2.19234	4.34197	5.76157
ENSG00000143199	ADCY10	0.00675982	0.0034616	0.0329348	0.0186739	0.0170526	0.00374654	0.00673654	0.0034616	0.0451977	0.0186739	0.0424651	0.00374654	0.00376351	0.0034616	0.011358	0.0186739	0.013214	0.00374654
ENSG00000272951	KRTAP12-4	0	0	0	0	0	0	0	0	0	0	0	0	0	0	0	0	0	0
ENSG00000106077	ABHD11	8.3124	8.72682	3.63758	5.96819	3.8493	3.92879	7.50688	8.72682	3.04561	5.96819	4.44169	3.92879	7.5298	8.72682	5.26988	5.96819	3.58824	3.92879
ENSG00000125945	ZNF436	1.85666	1.40801	1.81212	2.65804	1.79958	3.3725	1.7514	1.40801	2.07691	2.65804	2.25978	3.3725	1.8517	1.40801	2.34963	2.65804	3.69865	3.3725
ENSG00000125944	HNRNPR	14.182	13.6699	8.2179	11.9735	7.62982	8.67936	13.0249	13.6699	9.60634	11.9735	9.33193	8.67936	14.4015	13.6699	12.0685	11.9735	8.34724	8.67936
ENSG00000090316	MAEA	7.4939	7.40984	8.94884	7.84072	9.75842	6.98378	7.552	7.40984	7.9135	7.84072	8.9487	6.98378	6.79273	7.40984	7.5195	7.84072	7.14756	6.98378
ENSG00000106078	COBL	0	0.00148565	0	0.00667875	0	0	0.0115648	0.00148565	0	0.00667875	0	0	0	0.00148565	0	0.00667875	0	0
ENSG00000008394	MGST1	10.8205	10.7057	6.57952	6.11668	11.2189	5.84163	10.2707	10.7057	6.94453	6.11668	11.4549	5.84163	12.175	10.7057	6.9207	6.11668	5.19328	5.84163
ENSG00000130414	NDUFA10	6.03988	6.31314	4.56619	5.73438	4.51592	6.17781	6.31025	6.31314	4.18966	5.73438	4.40672	6.17781	5.97271	6.31314	5.3514	5.73438	5.32366	6.17781
ENSG00000130413	STK33	0	0.00559524	0.00241978	0	0.00229695	0.00605583	0.0027222	0.00559524	0.00228302	0	0	0.00605583	0	0.00559524	0	0	0.00800957	0.00605583
ENSG00000050628	PTGER3	0.102885	0.107522	0.0744005	0.106341	0.0441399	0.0418944	0.075329	0.107522	0.0526466	0.106341	0.0471082	0.0418944	0.102872	0.107522	0.336334	0.106341	0.123134	0.0418944
ENSG00000164898	C7orf55	3.25399	3.40235	4.94492	3.82382	4.72826	3.72769	3.05283	3.40235	4.67682	3.82382	4.32534	3.72769	2.50144	3.40235	3.15693	3.82382	2.3953	3.72769
ENSG00000164896	FASTK	14.6685	15.4285	12.6775	16.8284	13.5781	12.9383	14.8591	15.4285	11.1936	16.8284	12.8432	12.9383	14.7845	15.4285	13.4626	16.8284	12.1284	12.9383
ENSG00000164897	TMUB1	14.2606	17.255	30.1516	26.7015	30.6051	22.2314	15.2634	17.255	24.1747	26.7015	24.5555	22.2314	12.353	17.255	19.614	26.7015	19.4205	22.2314
ENSG00000164893	SLC7A13	0	0.00946159	0	0.00850693	0	0	0	0.00946159	0	0.00850693	0	0	0	0.00946159	0	0.00850693	0	0
ENSG00000044446	PHKA2	0.910035	1.12973	0.504862	1.42627	0.541072	1.40614	0.845067	1.12973	0.437914	1.42627	0.732133	1.40614	0.905846	1.12973	1.10947	1.42627	1.09611	1.40614
ENSG00000155622	XAGE2B	0	0.0343863	0	0	0	0	0	0.0343863	0	0	0	0	0	0.0343863	0	0	0	0
ENSG00000155621	C9orf85	1.22251	1.4529	0.809443	1.24867	0.91922	1.55399	1.35551	1.4529	0.89272	1.24867	1.21319	1.55399	1.39842	1.4529	1.36472	1.24867	1.37839	1.55399
ENSG00000182704	TSKU	0.35662	0.725334	0.244719	0.490267	0.291427	0.506658	0.220243	0.725334	0.163721	0.490267	0.220873	0.506658	0.380316	0.725334	0.315074	0.490267	0.594022	0.506658
ENSG00000182700	IGIP	2.11034	2.33899	1.24842	2.37584	1.68946	4.01359	1.97343	2.33899	2.17452	2.37584	2.59435	4.01359	2.72003	2.33899	2.94678	2.37584	4.65506	4.01359
ENSG00000155629	PIK3AP1	38.0713	32.9385	16.2361	34.322	14.3113	34.5586	48.6915	32.9385	18.7892	34.322	17.5674	34.5586	51.6647	32.9385	38.6841	34.322	36.6191	34.5586
ENSG00000186638	KIF24	2.61282	2.30734	0.803009	3.62736	0.8239	1.99856	2.53076	2.30734	0.880181	3.62736	0.957067	1.99856	2.66444	2.30734	2.8185	3.62736	1.37134	1.99856
ENSG00000011332	DPF1	0.0605187	0.0664085	0.137855	0.14728	0.170841	0.0910418	0.068926	0.0664085	0.133676	0.14728	0.221124	0.0910418	0.0529471	0.0664085	0.0920008	0.14728	0.092951	0.0910418
ENSG00000186635	ARAP1	13.9261	12.8369	37.2347	15.9218	37.0302	20.2137	17.3134	12.8369	32.7897	15.9218	31.9316	20.2137	14.9397	12.8369	17.4928	15.9218	21.28	20.2137
ENSG00000170616	SCRT1	0.0274606	0.0618735	0.00973035	0.0455159	0.0508004	0.0243515	0.0437857	0.0618735	0.0137706	0.0455159	0.0591454	0.0243515	0.0122309	0.0618735	0	0.0455159	0.0268399	0.0243515
ENSG00000170615	SLC26A5	0.0368657	0.0251711	0.00544289	0	0.00516661	0.0272431	0.0122463	0.0251711	0.0154058	0	0.00551405	0.0272431	0.0136833	0.0251711	0.00688253	0	0.060054	0.0272431
ENSG00000170613	FAM71B	0	0	0	0	0	0.0182903	0	0	0	0	0	0.0182903	0	0	0	0	0	0.0182903
ENSG00000196159	FAT4	0.025244	0.0206832	0.0391339	0.017434	0.0604973	0.025184	0.0226413	0.0206832	0.0727893	0.017434	0.0770256	0.025184	0.0168654	0.0206832	0.00565541	0.017434	0.029608	0.025184
ENSG00000196154	S100A4	166.723	203.323	239.486	476.583	278.005	574.193	150.191	203.323	235.408	476.583	223.433	574.193	152.961	203.323	287.048	476.583	548.417	574.193
ENSG00000196155	PLEKHG4	1.50636	1.69066	0.91552	0.985573	1.35952	1.51597	1.33187	1.69066	0.91584	0.985573	1.17905	1.51597	1.51968	1.69066	0.7961	0.985573	1.13191	1.51597
ENSG00000196156	KRTAP4-3	0	0	0	0.040609	0	0.0488842	0	0	0	0.040609	0	0.0488842	0	0	0	0.040609	0	0.0488842
ENSG00000196150	ZNF250	2.01514	1.80281	2.15225	2.04862	2.26533	2.34462	1.67113	1.80281	2.04056	2.04862	1.9538	2.34462	1.60199	1.80281	1.65159	2.04862	2.10462	2.34462
ENSG00000196151	WDSUB1	2.83784	2.64763	1.67879	3.46334	2.66413	5.28947	2.63436	2.64763	2.08751	3.46334	3.30554	5.28947	3.31142	2.64763	3.95174	3.46334	5.09143	5.28947
ENSG00000196152	ZNF79	3.70014	3.19684	3.31137	2.7345	3.00766	1.95611	3.41321	3.19684	3.19558	2.7345	2.75866	1.95611	3.51792	3.19684	2.89068	2.7345	2.309	1.95611
ENSG00000128340	RAC2	234.88	247.321	302.402	230.584	230.947	224.241	230.633	247.321	282.441	230.584	212.971	224.241	214.453	247.321	207.492	230.584	254.184	224.241
ENSG00000128342	LIF	0.0522783	0.0107084	25.4661	0.0673953	4.88833	0.0463593	0.0729376	0.0107084	32.8572	0.0673953	4.85111	0.0463593	0.110602	0.0107084	0.163967	0.0673953	0.327018	0.0463593
ENSG00000128346	C22orf23	5.01705	3.61542	10.5075	4.95433	10.0028	6.06456	4.19664	3.61542	11.8205	4.95433	9.16786	6.06456	4.39839	3.61542	4.93327	4.95433	7.45531	6.06456
ENSG00000120594	PLXDC2	22.3756	23.4118	4.40977	13.8552	4.9176	17.8846	16.6235	23.4118	4.79393	13.8552	6.07955	17.8846	21.6205	23.4118	18.0878	13.8552	19.1893	17.8846
ENSG00000104881	PPP1R13L	0.334001	0.282949	0.588093	0.463235	0.388342	0.388514	0.493111	0.282949	0.499714	0.463235	0.462563	0.388514	0.34895	0.282949	0.33718	0.463235	0.334511	0.388514
ENSG00000272743	CEACAM5	0	0	0	0	0	0	0	0	0	0	0	0	0	0	0	0	0	0
ENSG00000175398	OR10P1	0.104268	0.0640726	0	0.0384051	0.0175353	0	0.166254	0.0640726	0.0697157	0.0384051	0	0	0.0232203	0.0640726	0	0.0384051	0.0611464	0
ENSG00000175395	ZNF25	1.17827	1.25181	0.788237	1.18403	0.949671	2.02144	1.10113	1.25181	0.898962	1.18403	0.903844	2.02144	1.4862	1.25181	2.01536	1.18403	2.50397	2.02144
ENSG00000175390	EIF3F	19.0882	21.3161	7.86795	17.9275	8.29923	20.8198	20.0244	21.3161	7.278	17.9275	7.24027	20.8198	20.1277	21.3161	15.6715	17.9275	17.5256	20.8198
ENSG00000175393	OR10A6	0	0	0.0178453	0.0371001	0	0	0.0401511	0	0	0.0371001	0	0	0	0	0	0.0371001	0	0
ENSG00000198088	NUP62CL	0.0553609	0.113398	0.00980824	0.25489	0.0372415	0.233191	0.176545	0.113398	0.0740311	0.25489	0.0397459	0.233191	0.234247	0.113398	0.29766	0.25489	0.216438	0.233191
ENSG00000198089	SFI1	1.06694	1.17746	0.958884	1.23166	0.969635	1.45016	1.15945	1.17746	0.831219	1.23166	0.901811	1.45016	1.17843	1.17746	1.46544	1.23166	1.45388	1.45016
ENSG00000096006	CRISP3	0	0	0	0	0	0	0	0	0	0	0	0	0	0	0	0	0.00902547	0
ENSG00000134882	UBAC2	19.1009	17.926	9.11507	19.8211	11.467	20.7504	19.5659	17.926	9.14867	19.8211	11.4017	20.7504	17.8177	17.926	18.1865	19.8211	17.2061	20.7504
ENSG00000198087	CD2AP	2.65859	2.60322	2.06922	3.58301	3.14269	3.80551	2.22675	2.60322	2.64584	3.58301	3.86431	3.80551	3.15882	2.60322	5.02304	3.58301	4.7674	3.80551
ENSG00000198081	ZBTB14	3.61601	3.33719	1.44547	2.99583	1.6516	3.58398	2.80054	3.33719	1.32168	2.99583	1.7943	3.58398	2.9441	3.33719	3.36224	2.99583	3.33245	3.58398
ENSG00000134884	ARGLU1	19.7816	19.7485	12.8899	14.9935	9.83731	19.1667	18.3177	19.7485	14.0982	14.9935	12.775	19.1667	21.0286	19.7485	16.4305	14.9935	20.8826	19.1667
ENSG00000198083	KRTAP9-9	0	0	0	0	0	0	0	0	0	0	0	0	0	0	0	0	0	0
ENSG00000067113	PPAP2A	2.07904	1.98172	1.59554	1.9334	1.6963	2.84078	1.97957	1.98172	1.91826	1.9334	1.8935	2.84078	2.21186	1.98172	2.12132	1.9334	2.69598	2.84078
ENSG00000255472	RP11-998D10.1	0.168693	0.17277	0.112077	0.116503	0	0.327236	0.168112	0.17277	0.458218	0.116503	0.189237	0.327236	0.328718	0.17277	0.283443	0.116503	0.2061	0.327236
ENSG00000255470	RP11-113D6.6	0	0	0	0	0.0509668	0	0.0402684	0	0	0	0.0181314	0	0	0	0	0	0	0
ENSG00000198336	MYL4	0.177561	0.259789	0.168527	0.128467	0.202631	0.168704	0.189589	0.259789	0.190802	0.128467	0.125202	0.168704	0.282447	0.259789	0.071034	0.128467	0.297509	0.168704
ENSG00000198331	HYLS1	3.10651	2.82729	0.888694	3.86081	0.994846	3.26709	2.57869	2.82729	0.815336	3.86081	1.27906	3.26709	3.52842	2.82729	2.92176	3.86081	2.16394	3.26709
ENSG00000237918	SAPCD1	0	0	0	0	0	0	0	0	0	0	0	0	0	0	0	0	0	0
ENSG00000198339	HIST1H4I	0.10815	0.18988	0.10949	0.0569071	0.16889	0.119881	0.123174	0.18988	0.116215	0.0569071	0.194113	0.119881	0.154831	0.18988	0.13845	0.0569071	0.241611	0.119881
ENSG00000160796	NBEAL2	4.80113	5.79152	3.43502	5.7345	5.08023	6.09493	4.59086	5.79152	2.99009	5.7345	4.47744	6.09493	4.82131	5.79152	3.23106	5.7345	3.87883	6.09493
ENSG00000160791	CCR5	0.331304	0.328366	0.0662706	0.246028	0	0.130312	0.213009	0.328366	0.00893216	0.246028	0.019182	0.130312	0.261804	0.328366	0.197527	0.246028	0.114902	0.130312
ENSG00000160799	CCDC12	6.15407	7.46949	5.74153	6.12503	5.91619	4.49454	6.27641	7.46949	6.02257	6.12503	5.67167	4.49454	5.40912	7.46949	5.0259	6.12503	3.96731	4.49454
ENSG00000167220	HDHD2	7.9133	6.8577	4.54046	5.69054	4.06518	6.67412	6.87941	6.8577	5.23498	5.69054	5.48653	6.67412	7.30356	6.8577	6.21574	5.69054	6.29877	6.67412
ENSG00000168040	FADD	26.362	29.9196	27.9753	31.4672	26.2046	27.6725	23.7216	29.9196	25.9891	31.4672	25.5292	27.6725	21.6233	29.9196	27.8251	31.4672	26.5923	27.6725
ENSG00000249861	LGALS16	0.0611171	0	0	0	0	0	0	0	0	0	0	0	0	0	0	0	0	0
ENSG00000249860	MTRNR2L5	0	0	0	0	0	0	0	0	0	0	0	0	0	0	0	0	0	0
ENSG00000176155	CCDC57	2.89723	2.27644	2.9772	2.15926	1.85496	2.4026	4.15658	2.27644	3.0971	2.15926	1.73337	2.4026	3.83175	2.27644	3.3522	2.15926	3.13765	2.4026
ENSG00000176153	GPX2	0.10323	0.332279	0.0522548	0.203695	0.0744035	0.26155	0.249838	0.332279	0.0862776	0.203695	0.079407	0.26155	0.295576	0.332279	0.165191	0.203695	0.187379	0.26155
ENSG00000146166	LGSN	0.00736573	0	0	0	0	0	0	0	0	0	0	0	0	0	0	0	0.00359961	0
ENSG00000036473	OTC	0	0	0	0	0	0.0145111	0.0130459	0	0.0109412	0	0	0.0145111	0	0	0	0	0	0.0145111
ENSG00000132109	TRIM21	30.3054	30.3737	18.1264	27.2993	20.6386	29.9283	30.7307	30.3737	17.2085	27.2993	19.0693	29.9283	31.0462	30.3737	30.2674	27.2993	27.2619	29.9283
ENSG00000133275	CSNK1G2	29.36	30.4867	32.3802	36.939	34.4373	32.5992	33.7231	30.4867	28.4628	36.939	29.9018	32.5992	29.5891	30.4867	31.5742	36.939	27.7516	32.5992
ENSG00000148300	REXO4	20.5577	20.0324	13.0694	15.4088	12.9296	12.8584	21.7917	20.0324	12.8178	15.4088	12.445	12.8584	18.5082	20.0324	14.1922	15.4088	9.37151	12.8584
ENSG00000188488	SERPINA5	0	0	0	0.010182	0	0	0.00550967	0	0	0.010182	0	0	0	0	0	0.010182	0	0
ENSG00000148308	GTF3C5	11.0555	13.0315	8.80816	21.1551	8.73256	12.6754	11.7064	13.0315	7.79772	21.1551	7.43065	12.6754	10.4814	13.0315	15.1727	21.1551	10.2366	12.6754
ENSG00000095066	HOOK2	4.0557	3.48941	7.29356	3.89196	6.07002	4.13614	5.24069	3.48941	5.99239	3.89196	5.02296	4.13614	4.4927	3.48941	4.78909	3.89196	4.93542	4.13614
ENSG00000135823	STX6	7.71711	7.69634	6.54226	6.99616	5.17793	7.96211	7.3632	7.69634	8.59325	6.99616	5.88045	7.96211	7.73218	7.69634	9.05685	6.99616	8.73275	7.96211
ENSG00000135821	GLUL	24.5766	24.5753	25.4626	32.7659	29.0884	37.4489	22.3948	24.5753	26.0933	32.7659	30.6631	37.4489	22.0477	24.5753	27.8074	32.7659	31.3275	37.4489
ENSG00000135824	RGS8	0.025969	0.0177311	0	0.0318841	0.0145579	0.00959534	0.0258796	0.0177311	0	0.0318841	0.0155369	0.00959534	0.0289164	0.0177311	0.0193928	0.0318841	0.050764	0.00959534
ENSG00000135829	DHX9	38.4771	37.7168	22.3107	32.4287	21.4039	26.9563	37.7439	37.7168	25.3353	32.4287	26.198	26.9563	42.3611	37.7168	38.1141	32.4287	24.2608	26.9563
ENSG00000135828	RNASEL	3.6467	3.50942	3.46137	4.17176	3.39101	4.67282	3.55653	3.50942	3.62797	4.17176	4.54584	4.67282	4.02287	3.50942	4.45655	4.17176	6.23167	4.67282
ENSG00000162761	LMX1A	0	0	0	0.00913097	0	0	0	0	0	0.00913097	0	0	0	0	0	0.00913097	0	0
ENSG00000083520	DIS3	9.20643	8.69653	4.75595	6.20046	4.767	5.9028	7.87726	8.69653	5.64144	6.20046	5.48193	5.9028	10.6859	8.69653	8.3314	6.20046	6.97349	5.9028
ENSG00000249240	AC069368.3	29.7509	26.6757	76.6604	25.9592	69.8862	22.1535	36.0769	26.6757	64.7228	25.9592	62.0017	22.1535	30.9564	26.6757	29.103	25.9592	21.5348	22.1535
ENSG00000249242	TMEM150C	0.491742	0.758335	0.270377	0.588134	0.342204	0.946065	0.394292	0.758335	0.363748	0.588134	0.410868	0.946065	0.553846	0.758335	0.639465	0.588134	0.994399	0.946065
ENSG00000162769	FLVCR1	3.59134	2.9656	0.944426	1.94862	0.744815	1.33887	3.07182	2.9656	1.01757	1.94862	0.913414	1.33887	3.65822	2.9656	2.09982	1.94862	1.46073	1.33887
ENSG00000241476	SSX2	0	0	0	0	0	0.014974	0	0	0	0	0	0.014974	0	0	0	0	0	0.014974
ENSG00000268898	AC007377.1	0	0	0	0	0	0	0	0	0	0	0.365116	0	0	0	0	0	0	0
ENSG00000112796	ENPP5	0.0194646	0.00996751	0.00862131	0	0	0.010788	0	0.00996751	0	0	0	0.010788	0.0108369	0.00996751	0	0	0.0142684	0.010788
ENSG00000268897	BTK	0	0	0	0	0	0	0	0	0	0	0	0	0	0	0	0	0	0
ENSG00000233345	MSH5	0	0	0	0	0	0	0	0	0	0	0	0	0	0	0	0	0	0
ENSG00000173253	DMRT2	3.02904	4.42451	2.1177	6.43417	1.3123	15.011	3.01154	4.42451	1.92687	6.43417	1.55334	15.011	2.37756	4.42451	7.33424	6.43417	10.4209	15.011
ENSG00000173250	GPR151	0.0134386	0.0137634	0.0119046	0	0.00565014	0	0.0133924	0.0137634	0	0	0	0	0	0.0137634	0.0150533	0	0	0
ENSG00000173258	ZNF483	0.00723223	0	0	0.00998949	0	0.00801674	0.010811	0	0.00604454	0.00998949	0.016226	0.00801674	0.0120796	0	0.00810119	0.00998949	0.0106031	0.00801674
ENSG00000233348	BAG6	0	0	0	0	0	0	0	0	0	0	0	0	0	0	0	0	0	0
ENSG00000116161	CACYBP	28.8511	28.3752	20.345	29.3165	20.9333	21.9444	24.9601	28.3752	22.0944	29.3165	23.3773	21.9444	30.1789	28.3752	31.5962	29.3165	21.6382	21.9444
ENSG00000105281	SLC1A5	79.7277	82.7197	50.3261	83.9094	47.2584	121.855	85.6652	82.7197	48.887	83.9094	42.3107	121.855	73.6325	82.7197	70.6198	83.9094	105.333	121.855
ENSG00000258973	RP11-934B9.3	0.914753	0.822609	1.0475	1.91066	1.40707	2.17635	0.711494	0.822609	1.19341	1.91066	1.46164	2.17635	0.844669	0.822609	1.67445	1.91066	1.78815	2.17635
ENSG00000271092	TMEM56-RWDD3	3.91496	3.6628	2.46512	3.12759	2.73147	4.78532	3.82766	3.6628	2.82103	3.12759	3.93119	4.78532	4.38284	3.6628	3.21197	3.12759	4.27115	4.78532
ENSG00000271091	RP2	0	0	0	0	0	0	0	0	0	0	0	0	0	0	0	0	0	0
ENSG00000268763	AC018630.2	0	0	0	0	0	0	0	0	0	0	0	0	0	0	0	0	0	0
ENSG00000268762	SPIN4	0	0	0	0	0	0	0	0	0	0	0	0	0	0	0	0	0	0
ENSG00000268760	TMEM255A	0	0	0	0	0	0	0	0	0	0	0	0	0	0	0	0	0	0
ENSG00000268767	PLS3	0	0	0	0	0	0	0	0	0	0	0	0	0	0	0	0	0	0
ENSG00000268765	CYBB	0	0	0	0	0	0	0	0	0	0	0	0	0	0	0	0	0	0
ENSG00000268768	HCFC1	0	0	0	0	0	0	0	0	0	0	0	0	0	0	0	0	0	0
ENSG00000021776	AQR	4.91838	4.60262	3.18405	3.99364	3.42387	3.70907	4.60118	4.60262	3.58398	3.99364	3.8312	3.70907	5.22851	4.60262	5.18846	3.99364	3.96314	3.70907
ENSG00000272670	DOC2B	0	0	0	0	0	0	0	0	0	0	0	0	0	0	0	0	0	0
ENSG00000272674	AC244517.1	0	0	0	0	0	0	0	0	0	0	0	0	0	0	0	0	0	0
ENSG00000271321	CTAGE6	0.03978	0.0977795	0.0211434	0.0146523	0.0267602	0.0881903	0.0951433	0.0977795	0.0398968	0.0146523	0.142799	0.0881903	0.132884	0.0977795	0.00891193	0.0146523	0.20218	0.0881903
ENSG00000130997	POLN	0.575099	0.577989	0.352329	0.485026	0.334445	0.61961	0.621325	0.577989	0.451457	0.485026	0.393111	0.61961	0.715179	0.577989	0.418428	0.485026	0.556846	0.61961
ENSG00000271325	CRIP1	0	0	0	0	0	0	0	0	0	0	0	0	0	0	0	0	0	0
ENSG00000271326	LILRB4	0	0	0	0	0	0	0	0	0	0	0	0	0	0	0	0	0	0
ENSG00000236737	GAGE12B	0	0	0	0	0	0	0	0	0	0	0	0	0	0	0	0	0	0
ENSG00000138002	IFT172	0.913847	0.928344	0.255986	1.23723	0.463138	1.44281	0.809784	0.928344	0.282803	1.23723	0.463251	1.44281	0.8113	0.928344	0.888083	1.23723	1.13701	1.44281
ENSG00000232434	C9orf172	0.686687	1.11655	2.14472	0.977818	2.4466	1.07506	0.931242	1.11655	1.49692	0.977818	2.06476	1.07506	0.764622	1.11655	0.634386	0.977818	0.954852	1.07506
ENSG00000174705	SH3PXD2B	5.11904	5.14685	7.93338	1.6	13.889	2.45368	4.59852	5.14685	7.80457	1.6	12.2786	2.45368	4.24895	5.14685	2.63687	1.6	3.5008	2.45368
ENSG00000234776	C11orf94	0.674773	0.518311	0.398496	0.0517793	0.66197	0.498646	0.392262	0.518311	0.0939934	0.0517793	0.403706	0.498646	0.125226	0.518311	0.314937	0.0517793	0.2748	0.498646
ENSG00000117691	NENF	16.9533	16.1604	16.6993	19.3583	22.3303	20.6644	18.1452	16.1604	15.9571	19.3583	18.1735	20.6644	16.0296	16.1604	14.9183	19.3583	16.9002	20.6644
ENSG00000113532	ST8SIA4	6.67416	6.55735	2.08946	6.82727	3.30641	8.33065	6.74403	6.55735	2.8013	6.82727	4.07109	8.33065	7.98301	6.55735	8.19177	6.82727	8.23803	8.33065
ENSG00000236884	HLA-DRB1	0	0	0	0	0	0	0	0	0	0	0	0	0	0	0	0	0	0
ENSG00000117697	NSL1	4.0829	4.4465	1.42426	4.03054	2.42672	4.81814	3.49263	4.4465	1.94147	4.03054	2.94039	4.81814	4.03801	4.4465	4.35758	4.03054	4.11454	4.81814
ENSG00000145536	ADAMTS16	0.00353902	0.00362455	0	0	0.00595178	0.00392291	0.00352683	0.00362455	0.00295784	0	0	0.00392291	0	0.00362455	0	0	0	0.00392291
ENSG00000170935	NCBP2L	0	0	0	0	0	0	0	0	0	0	0	0	0	0	0	0	0	0
ENSG00000086544	ITPKC	2.89938	2.85645	3.71957	2.94077	3.61323	3.3226	3.58578	2.85645	3.4325	2.94077	3.33912	3.3226	2.92812	2.85645	2.53365	2.94077	3.32512	3.3226
ENSG00000076067	RBMS2	0.563776	0.785741	0.509715	0.995468	0.840614	1.31429	0.613963	0.785741	0.548914	0.995468	0.8502	1.31429	0.556571	0.785741	0.813807	0.995468	1.10774	1.31429
ENSG00000156675	RAB11FIP1	10.2299	11.7253	6.71328	10.4825	7.89522	11.5096	7.0656	11.7253	5.92749	10.4825	7.79395	11.5096	7.82732	11.7253	7.81602	10.4825	10.8075	11.5096
ENSG00000086548	CEACAM6	1.82882	2.96619	0.451687	4.52623	0.388741	11.7412	2.06643	2.96619	0.454569	4.52623	0.433187	11.7412	1.69572	2.96619	0.830083	4.52623	4.0999	11.7412
ENSG00000262258	KDM4E	0	0	0	0	0	0	0	0	0	0	0	0	0	0	0	0	0	0
ENSG00000167283	ATP5L	32.8018	34.2618	47.1712	39.9166	48.1154	31.5705	34.6672	34.2618	41.6542	39.9166	45.8629	31.5705	31.9393	34.2618	38.6225	39.9166	30.5225	31.5705
ENSG00000224305	HLA-DQB2	0	0	0	0	0	0	0	0	0	0	0	0	0	0	0	0	0	0
ENSG00000261577	JUP	0	0	0	0	0	0	0	0	0	0	0	0	0	0	0	0	0	0
ENSG00000273256	PCDHA6	0	0	0	0	0	0	0	0	0	0	0	0	0	0	0	0	0	0
ENSG00000039600	SOX30	0.00597789	0	0.010591	0.00550463	0	0.0331317	0.0178719	0	0.00499619	0.00550463	0.0107294	0.0331317	0.0266254	0	0	0.00550463	0.0175283	0.0331317
ENSG00000273259	RP11-986E7.7	0.0270613	0	0	0	0	0	0.0269681	0	0	0	0.00607138	0	0	0	0	0	0	0
ENSG00000261579	MED22	0	0	0	0	0	0	0	0	0	0	0	0	0	0	0	0	0	0
ENSG00000156427	FGF18	0.0417911	0.0321008	0.138827	0.0865856	0.114209	0.0231622	0.135353	0.0321008	0.139712	0.0865856	0.16877	0.0231622	0.0814347	0.0321008	0.0585154	0.0865856	0.0306348	0.0231622
ENSG00000269382	ARCN1	0	0	0	0	0	0	0	0	0	0	0	0	0	0	0	0	0	0
ENSG00000269383	AC012493.2	0	0	0	0	0	0	0	0	0	0	0	0	0	0	0	0	0	0
ENSG00000269380	XK	0	0	0	0	0	0	0	0	0	0	0	0	0	0	0	0	0	0
ENSG00000269381	RP11-770J1.5	0	0	0	0	0	0	0	0	0	0	0	0	0	0	0	0	0	0
ENSG00000269384	SMC1A	0	0	0	0	0	0	0	0	0	0	0	0	0	0	0	0	0	0
ENSG00000269389	AF196779.12	0	0	0	0	0	0	0	0	0	0	0	0	0	0	0	0	0	0
ENSG00000023608	SNAPC1	2.78896	2.17628	2.00692	2.56816	1.89191	2.72779	2.45238	2.17628	2.59213	2.56816	2.29957	2.72779	3.20118	2.17628	3.16782	2.56816	2.57321	2.72779
ENSG00000012779	ALOX5	2.56199	3.50046	3.38184	2.57174	6.64288	2.95848	1.85736	3.50046	3.24717	2.57174	6.21035	2.95848	1.24769	3.50046	4.2448	2.57174	2.32246	2.95848
ENSG00000268172	AL590452.1	0.131133	0.0723166	0.0357426	0.0650199	0.0678566	0.145357	0.150786	0.0723166	0.0168612	0.0650199	0.0543148	0.145357	0.426815	0.0723166	0.248581	0.0650199	0.295774	0.145357
ENSG00000143278	F13B	0	0	0	0.00779859	0	0.00938777	0	0	0	0.00779859	0.0152008	0.00938777	0	0	0.00948666	0.00779859	0.00827764	0.00938777
ENSG00000156395	SORCS3	0	0.00687504	0	0.00309068	0	0	0.0100345	0.00687504	0.00280521	0.00309068	0	0	0	0.00687504	0	0.00309068	0	0
ENSG00000156398	SFXN2	1.04082	0.901979	0.210483	1.00361	0.212829	0.687081	0.831333	0.901979	0.319465	1.00361	0.125159	0.687081	1.05254	0.901979	1.24109	1.00361	0.492238	0.687081
ENSG00000111971	LY6G5C	0	0	0	0	0	0	0	0	0	0	0	0	0	0	0	0	0	0
ENSG00000234487	HLA-F	0	0	0	0	0	0	0	0	0	0	0	0	0	0	0	0	0	0
ENSG00000068394	GPKOW	9.95008	9.8476	10.308	13.9748	11.1926	13.4553	11.0004	9.8476	9.62544	13.9748	9.80953	13.4553	7.96329	9.8476	11.5609	13.9748	13.15	13.4553
ENSG00000176834	VSIG10	1.01395	1.08662	0.369696	1.66709	0.657375	1.28683	1.02217	1.08662	0.493725	1.66709	0.640919	1.28683	1.09958	1.08662	1.44853	1.66709	1.03412	1.28683
ENSG00000181626	ANKRD62	0	0.0044162	0	0.00794121	0	0.00955945	0.00429713	0.0044162	0	0.00794121	0	0.00955945	0	0.0044162	0	0.00794121	0.00421451	0.00955945
ENSG00000181625	SLX1B	18.9541	22.4591	30.5423	28.6831	25.3139	26.6621	21.1313	22.4591	21.4976	28.6831	22.0547	26.6621	16.9481	22.4591	25.2909	28.6831	24.6295	26.6621
ENSG00000110375	UPK2	0.0562819	0.134498	0.415476	0.0345507	0.55214	0.0623871	0.130872	0.134498	0.439033	0.0345507	0.488252	0.0623871	0.125339	0.134498	0.147103	0.0345507	0.0550096	0.0623871
ENSG00000168748	CA7	0.0780048	0.0456514	0.0197429	0.0410452	0.103074	0.0741139	0.0555258	0.0456514	0	0.0410452	0	0.0741139	0.0992661	0.0456514	0.0249649	0.0410452	0.0217833	0.0741139
ENSG00000269964	MEI4	0	0	0	0	0.0145397	0	0	0	0	0	0	0	0	0	0	0	0.00422505	0
ENSG00000134690	CDCA8	9.09304	8.98573	1.71225	19.3774	2.09174	9.18511	8.5006	8.98573	1.80512	19.3774	1.65167	9.18511	8.17864	8.98573	10.1762	19.3774	5.74976	9.18511
ENSG00000168743	NPNT	0.0101762	0.0138962	0	0.0187411	0	0.0225601	0.0135215	0.0138962	0	0.0187411	0.00608826	0.0225601	0.00377705	0.0138962	0.00759925	0.0187411	0.00663077	0.0225601
ENSG00000168746	C20orf62	0	0	0	0	0	0.0258427	0	0	0	0	0	0.0258427	0	0	0	0	0.0455735	0.0258427
ENSG00000134698	AGO4	8.13182	7.57973	3.48036	9.49149	3.90633	10.973	7.67415	7.57973	3.76331	9.49149	4.63538	10.973	8.24082	7.57973	8.43082	9.49149	8.94149	10.973
ENSG00000262004	LILRA2	0	0	0	0	0	0	0	0	0	0	0	0	0	0	0	0	0	0
ENSG00000262007	KIR3DL2	0	0	0	0	0	0	0	0	0	0	0	0	0	0	0	0	0	0
ENSG00000262003	RP11-676J12.7	3.26421	2.85071	14.4804	3.26209	11.8303	3.70244	2.67298	2.85071	15.375	3.26209	12.7394	3.70244	3.35292	2.85071	4.33668	3.26209	4.42702	3.70244
ENSG00000262009	NLRP7	0	0	0	0	0	0	0	0	0	0	0	0	0	0	0	0	0	0
ENSG00000108861	DUSP3	25.4564	26.8051	21.6006	27.7106	20.7617	34.9773	23.4709	26.8051	22.0751	27.7106	21.6266	34.9773	23.7403	26.8051	23.7478	27.7106	29.1012	34.9773
ENSG00000260716	TONSL	0	0	0	0	0	0	0	0	0	0	0	0	0	0	0	0	0	0
ENSG00000260717	CCL4L1	0	0	0	0	0	0	0	0	0	0	0	0	0	0	0	0	0	0
ENSG00000215203	GRXCR1	0	0	0	0	0	0	0	0	0	0	0	0	0	0	0	0	0	0
ENSG00000143891	GALM	10.0697	10.8691	3.26108	6.71126	5.52196	10.8982	6.8259	10.8691	2.34332	6.71126	5.90664	10.8982	7.15484	10.8691	11.8211	6.71126	12.11	10.8982
ENSG00000071246	VASH1	45.4964	51.351	20.1429	45.7228	21.7303	31.7817	41.9189	51.351	18.6575	45.7228	20.8676	31.7817	38.2403	51.351	49.9184	45.7228	30.18	31.7817
ENSG00000071242	RPS6KA2	9.35643	9.52841	21.052	7.94581	17.3884	21.8365	8.18784	9.52841	18.4	7.94581	16.4839	21.8365	8.20124	9.52841	13.3115	7.94581	28.0843	21.8365
ENSG00000071243	ING3	1.74303	1.7281	1.23031	1.3925	1.3084	1.48217	1.62202	1.7281	1.37364	1.3925	1.49996	1.48217	2.14912	1.7281	1.63597	1.3925	1.47415	1.48217
ENSG00000251655	PRB1	0	0.0324191	0	0	0	0.0175439	0	0.0324191	0	0	0	0.0175439	0	0.0324191	0	0	0	0.0175439
ENSG00000105926	MPP6	1.23136	1.24751	0.468884	0.736201	0.540059	0.709468	1.14546	1.24751	0.675606	0.736201	0.618114	0.709468	1.35138	1.24751	0.982384	0.736201	0.766272	0.709468
ENSG00000105929	ATP6V0A4	0.0051436	0.00526791	0	0.00473638	0	0.00570154	0	0.00526791	0	0.00473638	0.009232	0.00570154	0	0.00526791	0	0.00473638	0	0.00570154
ENSG00000105928	DFNA5	1.1444	0.897981	2.90636	0.48683	2.93264	1.365	0.936648	0.897981	2.8312	0.48683	3.24505	1.365	1.01749	0.897981	1.22585	0.48683	2.2243	1.365
ENSG00000132669	RIN2	12.783	12.6714	11.1055	11.3286	17.6824	16.6822	9.28516	12.6714	11.7957	11.3286	19.6528	16.6822	11.0194	12.6714	17.5617	11.3286	20.4488	16.6822
ENSG00000132664	POLR3F	2.36689	2.3878	1.51916	2.19256	1.4778	1.46107	1.97739	2.3878	1.78867	2.19256	1.82521	1.46107	3.22733	2.3878	2.56396	2.19256	1.50993	1.46107
ENSG00000226271	OR2J3	0	0	0	0	0	0	0	0	0	0	0	0	0	0	0	0	0	0
ENSG00000132661	NXT1	22.2089	24.146	9.9023	14.4448	10.9067	10.6705	25.502	24.146	11.4274	14.4448	10.9769	10.6705	20.5942	24.146	15.1292	14.4448	8.65025	10.6705
ENSG00000226275	LTA	0	0	0	0	0	0	0	0	0	0	0	0	0	0	0	0	0	0
ENSG00000119596	YLPM1	10.9045	10.5829	9.40492	8.91248	9.54596	7.67737	10.9247	10.5829	10.0592	8.91248	10.4044	7.67737	10.1625	10.5829	7.28039	8.91248	6.59027	7.67737
ENSG00000261717	RP11-77K12.1	8.6912	10.906	11.5486	9.84168	9.5139	7.46416	9.44156	10.906	11.583	9.84168	11.6644	7.46416	8.71856	10.906	9.20922	9.84168	6.88762	7.46416
ENSG00000119599	DCAF4	4.04129	4.10089	2.36139	3.02295	2.24152	2.7117	4.43493	4.10089	2.26211	3.02295	2.36557	2.7117	3.9949	4.10089	3.56901	3.02295	2.0858	2.7117
ENSG00000139679	LPAR6	19.0662	21.9257	15.6009	19.5827	15.0349	36.582	12.7866	21.9257	18.0621	19.5827	16.2598	36.582	20.1689	21.9257	27.2457	19.5827	49.8855	36.582
ENSG00000148841	ITPRIP	29.8938	28.9256	44.1087	24.1664	37.2226	27.4717	27.5554	28.9256	40.8409	24.1664	36.0689	27.4717	25.053	28.9256	24.5544	24.1664	28.4798	27.4717
ENSG00000148840	PPRC1	17.6059	17.926	9.84775	10.6691	9.49199	7.16637	18.5906	17.926	10.1736	10.6691	8.90286	7.16637	17.2069	17.926	10.9396	10.6691	6.54676	7.16637
ENSG00000148843	PDCD11	20.7155	21.1673	9.87505	15.2837	9.77559	10.5341	21.5742	21.1673	10.2683	15.2837	9.38614	10.5341	19.893	21.1673	15.8937	15.2837	8.73626	10.5341
ENSG00000148842	CNNM2	3.99122	3.92626	2.60554	3.13566	2.66888	3.7535	3.99014	3.92626	2.90446	3.13566	2.7628	3.7535	4.3706	3.92626	3.02275	3.13566	3.52084	3.7535
ENSG00000187701	OR2T27	0	0	0	0.0600835	0	0	0.0433497	0	0	0.0600835	0	0	0	0	0	0.0600835	0	0
ENSG00000148848	ADAM12	0.0925931	0.0948309	0.0782948	0.0775114	0.215883	0.0559838	0.121634	0.0948309	0.158292	0.0775114	0.190742	0.0559838	0.147623	0.0948309	0.120219	0.0775114	0.0719886	0.0559838
ENSG00000139675	HNRNPA1L2	13.9323	14.4038	2.3549	17.5473	2.61899	13.5763	14.7149	14.4038	3.15305	17.5473	3.11005	13.5763	12.4655	14.4038	15.7832	17.5473	9.56129	13.5763
ENSG00000162624	LHX8	0	0	0	0	0	0	0	0	0	0	0	0	0	0	0	0	0	0
ENSG00000135124	P2RX4	19.5998	20.0865	11.2055	11.3436	12.5912	22.6702	19.6691	20.0865	9.98975	11.3436	11.053	22.6702	19.7571	20.0865	14.3431	11.3436	26.0245	22.6702
ENSG00000162621	LRRC53	0.0430148	0.0660816	0.161944	0.0792187	0.0587767	0.131122	0.03215	0.0660816	0.143803	0.0792187	0.101332	0.131122	0.0239484	0.0660816	0.108412	0.0792187	0.246999	0.131122
ENSG00000162620	LRRIQ3	0.0734362	0.0655063	0.00839394	0.0654409	0.0318715	0.0761503	0.0731832	0.0655063	0.0217787	0.0654409	0.0552739	0.0761503	0.105511	0.0655063	0.0583778	0.0654409	0.0486225	0.0761503
ENSG00000162623	TYW3	8.47322	7.95061	3.75895	7.33053	3.96125	6.17353	7.38237	7.95061	5.11688	7.33053	4.56245	6.17353	10.6461	7.95061	9.19421	7.33053	6.454	6.17353
ENSG00000188706	ZDHHC9	6.51803	5.93788	2.93081	4.99985	3.58404	4.8211	5.44651	5.93788	3.043	4.99985	3.1396	4.8211	5.95782	5.93788	5.27973	4.99985	4.39024	4.8211
ENSG00000188707	ZBED6CL	0.0144544	0	0	0.01331	0	0	0	0	0	0.01331	0	0	0	0	0	0.01331	0	0
ENSG00000185634	SHC4	0.171114	0.154219	0.33954	0.185929	0.18993	0.333829	0.122778	0.154219	0.446201	0.185929	0.267198	0.333829	0.16767	0.154219	0.391014	0.185929	0.923197	0.333829
ENSG00000165076	PRSS37	0.0188373	0	0	0	0	0.031321	0	0	0	0	0	0.031321	0.0314628	0	0	0	0.0184115	0.031321
ENSG00000165071	TMEM71	0.261781	0.338327	0.110427	0.258274	0.28302	0.953441	0.192554	0.338327	0.140651	0.258274	0.246116	0.953441	0.24985	0.338327	0.265307	0.258274	0.639658	0.953441
ENSG00000185630	PBX1	0	0.00292831	0.00253281	0.00789854	0.0048085	0.00528226	0.00569872	0.00292831	0.00318622	0.00789854	0.011119	0.00528226	0.00212247	0.00292831	0.00427033	0.00789854	0.0037261	0.00528226
ENSG00000185633	NDUFA4L2	1.75252	1.85546	1.13323	1.00776	0.870516	3.16394	1.65069	1.85546	1.01356	1.00776	0.862695	3.16394	1.64677	1.85546	1.14306	1.00776	2.68138	3.16394
ENSG00000165072	MAMDC2	0.188434	0.148876	0.0238462	0.818003	0.325955	0.913078	0.0482876	0.148876	0.0764947	0.818003	0.420348	0.913078	0.0659434	0.148876	0.391996	0.818003	0.899823	0.913078
ENSG00000165078	CPA6	0	0	0	0	0	0.0094456	0.0254757	0	0	0	0.0076472	0.0094456	0	0	0	0	0.0416432	0.0094456
ENSG00000101353	MROH8	5.60979	6.21639	6.85958	7.05662	6.24607	6.45542	6.28328	6.21639	6.41825	7.05662	6.15259	6.45542	5.13294	6.21639	6.21792	7.05662	6.27746	6.45542
ENSG00000169903	TM4SF4	0.0387837	0.00993025	0	0	0	0.0107477	0.0193251	0.00993025	0	0	0	0.0107477	0	0.00993025	0	0	0	0.0107477
ENSG00000169902	TPST1	10.4867	11.3026	20.1604	11.5265	16.2261	12.0247	8.22503	11.3026	19.0874	11.5265	18.4199	12.0247	8.17619	11.3026	14.2158	11.5265	16.5576	12.0247
ENSG00000169905	TOR1AIP2	4.10017	3.91218	3.80252	4.35353	3.92747	4.44258	3.87462	3.91218	4.56329	4.35353	4.77065	4.44258	4.63895	3.91218	5.31559	4.35353	4.90997	4.44258
ENSG00000169906	S100G	0	0	0	0.0419924	0	0.0505495	0	0	0	0.0419924	0	0.0505495	0	0	0.051082	0.0419924	0.0445719	0.0505495
ENSG00000169908	TM4SF1	0.033941	0.0115871	5.60239	0	3.17749	0.13168	0.0225494	0.0115871	5.68289	0	3.77698	0.13168	0	0.0115871	0.012673	0	0.10505	0.13168
ENSG00000264872	MEST	0	0	0	0	0	0	0	0	0	0	0	0	0	0	0	0	0	0
ENSG00000089902	RCOR1	18.1932	17.7832	11.8547	14.8644	9.96163	14.96	18.5373	17.7832	12.4289	14.8644	11.7334	14.96	19.2634	17.7832	14.4243	14.8644	14.2831	14.96
ENSG00000180287	PLD5	0	0.00222637	0	0	0.00365587	0	0.00216635	0.00222637	0	0	0	0	0	0.00222637	0	0	0	0
ENSG00000112619	PRPH2	0.0767458	0.0214365	0	0.0256981	0.0117334	0.0077337	0.0695286	0.0214365	0.087467	0.0256981	0.0438287	0.0077337	0.0155374	0.0214365	0.046891	0.0256981	0.0681917	0.0077337
ENSG00000272863	KRTAP12-1	0	0	0	0	0	0	0	0	0	0	0	0	0	0	0	0	0	0
ENSG00000263068	NLRP7	0	0	0	0	0	0	0	0	0	0	0	0	0	0	0	0	0	0
ENSG00000263064	AC118758.1	0	0	0	0	0	0	0	0	0	0	0	0	0	0	0	0	0	0
ENSG00000263061	LILRB4	0	0	0	0	0	0	0	0	0	0	0	0	0	0	0	0	0	0
ENSG00000263062	NAIP	0	0	0	0	0	0	0	0	0	0	0	0	0	0	0	0	0	0
ENSG00000138780	GSTCD	2.84663	2.67904	0.844508	2.93236	1.0801	2.60665	2.93016	2.67904	1.00366	2.93236	1.23379	2.60665	3.16598	2.67904	2.93386	2.93236	2.59592	2.60665
ENSG00000138785	INTS12	4.2777	4.37563	2.24154	3.43378	2.32934	3.60796	4.18865	4.37563	2.63132	3.43378	2.24694	3.60796	4.17596	4.37563	3.78918	3.43378	3.37396	3.60796
ENSG00000014164	ZC3H3	10.3663	11.6705	10.3357	12.1215	9.81575	9.88181	11.0788	11.6705	8.23166	12.1215	7.61607	9.88181	9.38782	11.6705	9.16362	12.1215	8.39256	9.88181
ENSG00000258691	RP11-404P21.8	0.0970726	0.0497093	0.257974	0.0446937	0.571384	0.295907	0.169292	0.0497093	0.182545	0.0446937	0.283125	0.295907	0.162135	0.0497093	0.081552	0.0446937	0.166037	0.295907
ENSG00000258697	DUX4L6	0	0	0	0	0	0	0	0	0	0	0	0	0	0	0	0	0	0
ENSG00000154803	FLCN	2.37474	2.25623	4.21669	2.4464	4.34675	2.87677	2.38769	2.25623	3.7923	2.4464	3.93502	2.87677	2.2429	2.25623	2.01642	2.4464	2.64435	2.87677
ENSG00000196792	STRN3	4.26269	3.85638	4.95703	3.80592	4.41725	3.90977	4.31464	3.85638	5.58849	3.80592	5.59191	3.90977	4.74183	3.85638	5.19617	3.80592	4.68508	3.90977
ENSG00000196793	ZNF239	1.77804	2.03275	0.380946	1.1499	0.500689	0.953369	1.38456	2.03275	0.628977	1.1499	0.564046	0.953369	1.96142	2.03275	1.28764	1.1499	0.581975	0.953369
ENSG00000196796	CTB-134H23.2	0.707012	0.834288	0.163383	0.410437	0.0516967	0.596297	0.612676	0.834288	0.205532	0.410437	0.234486	0.596297	0.581883	0.834288	0.516496	0.410437	0.676007	0.596297
ENSG00000164304	CAGE1	0.0177243	0.0302545	0.015701	0.0217615	0.014904	0.0589408	0.0412143	0.0302545	0.0296272	0.0217615	0.00530209	0.0589408	0.0197359	0.0302545	0.0132359	0.0217615	0.0288728	0.0589408
ENSG00000184945	AQP12A	0	0	0	0	0	0	0.0118702	0	0	0	0	0	0	0	0	0	0	0
ENSG00000164306	PRIMPOL	2.81717	2.52647	0.808153	2.39252	1.05557	2.57264	2.40017	2.52647	0.945472	2.39252	1.15931	2.57264	2.99875	2.52647	2.59974	2.39252	2.37542	2.57264
ENSG00000164307	ERAP1	11.7888	10.96	4.60326	9.50755	5.5763	10.6424	10.3988	10.96	5.14049	9.50755	6.37118	10.6424	12.3874	10.96	12.1863	9.50755	10.6179	10.6424
ENSG00000164300	SERINC5	1.25138	1.46887	1.18411	2.06143	0.874602	1.75641	1.27136	1.46887	1.19189	2.06143	1.14854	1.75641	1.09934	1.46887	1.97061	2.06143	1.55666	1.75641
ENSG00000164303	ENPP6	0.0220596	0	0	0	0	0.0048905	0	0	0	0	0.00395937	0.0048905	0	0	0	0	0.0129366	0.0048905
ENSG00000164308	ERAP2	0.475259	0.532557	0.366523	0.324364	0.611208	0.517516	0.331536	0.532557	0.334125	0.324364	0.682416	0.517516	0.585231	0.532557	0.620046	0.324364	0.756888	0.517516
ENSG00000164309	CMYA5	3.82674	3.49358	0.313711	2.78668	0.263333	3.2783	3.27252	3.49358	0.294758	2.78668	0.393983	3.2783	4.53969	3.49358	3.56528	2.78668	2.30421	3.2783
ENSG00000100401	RANGAP1	21.5241	23.3241	11.5236	29.7283	13.037	17.9521	21.7111	23.3241	10.8343	29.7283	10.9619	17.9521	19.9957	23.3241	19.4048	29.7283	12.0686	17.9521
ENSG00000100403	ZC3H7B	13.8197	13.8306	9.9334	11.9559	11.2262	10.0107	14.7073	13.8306	9.6801	11.9559	11.4273	10.0107	12.7759	13.8306	10.4276	11.9559	8.55719	10.0107
ENSG00000104381	GDAP1	1.65912	1.48419	1.41075	1.36745	1.89892	1.14092	1.52583	1.48419	1.83176	1.36745	1.90253	1.14092	1.84742	1.48419	2.151	1.36745	1.1011	1.14092
ENSG00000212899	KRTAP3-3	0	0	0	0	0	0	0	0	0	0	0	0	0	0	0	0	0	0
ENSG00000104388	RAB2A	25.2522	24.9078	25.9357	22.9928	25.2734	22.1783	23.1172	24.9078	28.0278	22.9928	29.7164	22.1783	25.748	24.9078	25.1292	22.9928	25.7753	22.1783
ENSG00000125430	HS3ST3B1	4.8558	4.92168	26.3809	6.01997	18.7903	2.47699	6.29928	4.92168	30.2762	6.01997	25.1367	2.47699	5.09695	4.92168	12.6453	6.01997	4.12633	2.47699
ENSG00000125434	SLC25A35	1.25124	1.39054	1.35367	2.00528	1.41032	1.81781	1.08244	1.39054	0.987908	2.00528	1.37614	1.81781	1.05531	1.39054	1.40158	2.00528	1.70693	1.81781
ENSG00000203896	LIME1	2.58877	2.66736	1.51729	2.59987	1.80198	2.73954	2.83706	2.66736	1.82373	2.59987	1.94421	2.73954	2.57778	2.66736	2.40921	2.59987	2.22448	2.73954
ENSG00000182628	SKA2	4.15908	4.62413	1.56481	8.58824	2.44422	6.25414	4.19074	4.62413	2.35778	8.58824	2.97533	6.25414	5.07881	4.62413	7.66376	8.58824	5.37928	6.25414
ENSG00000182621	PLCB1	0.108089	0.077685	0.0487149	0.083816	0.0366748	0.0861818	0.181417	0.077685	0.0348674	0.083816	0.0204214	0.0861818	0.135137	0.077685	0.0509793	0.083816	0.0963783	0.0861818
ENSG00000262826	INTS3	0	0	0	0	0	0	0	0	0	0	0	0	0	0	0	0	0	0
ENSG00000262827	FCAR	0	0	0	0	0	0	0	0	0	0	0	0	0	0	0	0	0	0
ENSG00000254852	NPIPA2	3.6471	3.58643	1.26142	3.81328	1.08742	5.70169	3.14222	3.58643	0.983673	3.81328	1.57782	5.70169	3.64037	3.58643	3.46682	3.81328	6.09259	5.70169
ENSG00000007402	CACNA2D2	0.0361199	0.0538078	0.0261791	0.018142	0.019328	0.0436779	0.0589018	0.0538078	0.0274439	0.018142	0.0412554	0.0436779	0.036563	0.0538078	0.0147127	0.018142	0.032094	0.0436779
ENSG00000254858	MPV17L2	8.98973	10.3417	10.1589	11.3118	10.1662	6.17284	9.82075	10.3417	9.50346	11.3118	7.98912	6.17284	9.11181	10.3417	9.71061	11.3118	6.72524	6.17284
ENSG00000104967	NOVA2	0.348848	0.489423	0.126997	0.781072	0.204935	1.38519	0.245257	0.489423	0.103843	0.781072	0.122224	1.38519	0.215504	0.489423	0.693201	0.781072	1.46193	1.38519
ENSG00000104964	AES	42.9319	47.1062	62.719	59.3933	75.2639	64.6935	42.3821	47.1062	52.7291	59.3933	63.9326	64.6935	35.607	47.1062	48.2482	59.3933	59.2597	64.6935
ENSG00000104960	PTOV1	14.7215	15.4016	14.231	17.5619	17.8544	14.8061	14.6777	15.4016	12.5773	17.5619	15.1666	14.8061	14.4353	15.4016	14.4943	17.5619	13.3104	14.8061
ENSG00000054523	KIF1B	2.17895	1.69352	6.91261	1.8693	6.08936	2.81439	1.89446	1.69352	7.66085	1.8693	7.46395	2.81439	2.13635	1.69352	2.71399	1.8693	4.1803	2.81439
ENSG00000239264	TXNDC5	23.6271	22.7651	11.0456	16.4729	11.0973	17.2415	22.556	22.7651	11.2513	16.4729	10.7582	17.2415	23.7136	22.7651	15.8706	16.4729	16.3199	17.2415
ENSG00000228368	AC106873.4	0	0	0.040045	0	0	0	0	0	0	0	0	0	0.0503359	0	0	0	0.088367	0
ENSG00000106524	ANKMY2	2.97353	3.38791	1.50703	4.61262	2.35977	4.64997	2.36194	3.38791	1.78644	4.61262	2.74029	4.64997	3.3272	3.38791	4.29177	4.61262	5.03097	4.64997
ENSG00000155868	MED7	2.84207	2.26879	2.31572	2.80072	2.17422	2.87402	2.51995	2.26879	2.46464	2.80072	2.85099	2.87402	2.82358	2.26879	2.91227	2.80072	3.61326	2.87402
ENSG00000106526	ACTR3C	0	0.0164785	0	0	0	0.003567	0	0.0164785	0	0	0	0.003567	0.0107495	0.0164785	0	0	0.00629039	0.003567
ENSG00000008988	RPS20	376.269	384.232	275.145	328.397	260.393	336.832	395.213	384.232	267.055	328.397	243.686	336.832	363.786	384.232	328.2	328.397	306.957	336.832
ENSG00000180919	OR56B4	0.0180115	0.0553405	0	0.0995133	0.030291	0.0598959	0.035899	0.0553405	0.0150536	0.0995133	0.048492	0.0598959	0	0.0553405	0.0807025	0.0995133	0.0176044	0.0598959
ENSG00000180917	CMTR2	2.91179	2.66265	1.23152	2.04371	1.47506	2.44197	2.03996	2.66265	1.2351	2.04371	1.63074	2.44197	2.72728	2.66265	2.59951	2.04371	2.62664	2.44197
ENSG00000180914	OXTR	0.234429	0.225971	0.0651507	0.499462	0.0463827	0.382145	0.251945	0.225971	0.119095	0.499462	0.0742527	0.382145	0.21497	0.225971	0.272894	0.499462	0.512172	0.382145
ENSG00000180913	OR56B3P	0	0	0	0	0	0	0	0	0	0	0	0	0	0	0	0	0	0
ENSG00000160551	TAOK1	9.25896	7.93586	7.94546	7.9003	7.92747	9.68223	8.52442	7.93586	10.2978	7.9003	11.6825	9.68223	10.1982	7.93586	10.7547	7.9003	11.9161	9.68223
ENSG00000124479	NDP	0	0	0	0	0	0.0125478	0	0	0	0	0	0.0125478	0	0	0	0	0	0.0125478
ENSG00000205821	AC006435.1	0.181058	0.11126	0.0320779	0.0666896	0.0913488	0.200698	0.0721738	0.11126	0	0.0666896	0.0649945	0.200698	0.161286	0.11126	0.081125	0.0666896	0	0.200698
ENSG00000269679	AC018445.1	0	0	0	0.0776689	0	0.093496	0.0840561	0	0	0.0776689	0.0756949	0.093496	0.187839	0	0.188962	0.0776689	0.16488	0.093496
ENSG00000012983	MAP4K5	2.29004	2.10276	0.98416	1.40165	0.860933	1.65105	2.12477	2.10276	1.04233	1.40165	1.42467	1.65105	2.85619	2.10276	1.93381	1.40165	2.22497	1.65105
ENSG00000152076	CCDC74B	0.060116	0.0473607	0.225303	0.0468402	0.482172	0.0410074	0.0599089	0.0473607	0.135271	0.0468402	0.481397	0.0410074	0.0823862	0.0473607	0.0310795	0.0468402	0.099435	0.0410074
ENSG00000169174	PCSK9	0	0	0	0	0	0.00445478	0	0	0.00335886	0	0	0.00445478	0.00894991	0	0	0	0.00392799	0.00445478
ENSG00000213316	LTC4S	6.09249	6.95284	1.43406	5.73838	1.78575	7.17786	6.60926	6.95284	1.14933	5.73838	2.23389	7.17786	4.71	6.95284	2.51532	5.73838	4.95096	7.17786
ENSG00000156983	BRPF1	13.5247	14.6741	14.7092	15.1262	14.3257	12.0144	14.4258	14.6741	13.2763	15.1262	13.3376	12.0144	12.7986	14.6741	14.127	15.1262	11.4639	12.0144
ENSG00000037474	NSUN2	18.4015	17.5224	13.6703	13.2247	12.9035	12.4315	18.9277	17.5224	14.5166	13.2247	14.3597	12.4315	18.7402	17.5224	15.7369	13.2247	10.6263	12.4315
ENSG00000095261	PSMD5	3.88581	4.11397	3.3261	3.85408	3.88556	3.85583	3.90975	4.11397	3.39636	3.85408	4.63002	3.85583	3.89414	4.11397	4.95053	3.85408	4.02218	3.85583
ENSG00000123297	TSFM	7.91164	7.58095	3.9354	7.14691	4.15864	5.29377	6.54971	7.58095	4.07881	7.14691	3.98099	5.29377	6.66355	7.58095	6.1838	7.14691	4.08031	5.29377
ENSG00000255062	RP11-712L6.5	7.55418	8.48002	4.73396	8.35342	5.27035	6.72815	7.85691	8.48002	4.85239	8.35342	5.23991	6.72815	6.31784	8.48002	6.02305	8.35342	5.41666	6.72815
ENSG00000091947	TMEM101	9.85744	10.4254	8.13141	13.461	8.8131	13.6831	9.50264	10.4254	7.07641	13.461	7.9119	13.6831	8.61926	10.4254	10.5277	13.461	13.0559	13.6831
ENSG00000047597	XK	4.32044	4.05748	0.868543	5.58957	1.05235	5.31925	3.54692	4.05748	1.1459	5.58957	1.15174	5.31925	4.31817	4.05748	4.81276	5.58957	4.2851	5.31925
ENSG00000128965	CHAC1	0.323733	0.321196	0.905141	5.1516	0.621003	18.3238	0.705727	0.321196	0.676423	5.1516	0.499342	18.3238	0.574507	0.321196	5.40545	5.1516	16.7304	18.3238
ENSG00000225201	HLA-E	0	0	0	0	0	0	0	0	0	0	0	0	0	0	0	0	0	0
ENSG00000157168	NRG1	0.325181	0.258106	27.8266	0.756078	17.5821	0.252318	1.44747	0.258106	29.5107	0.756078	21.9356	0.252318	0.917288	0.258106	2.18551	0.756078	1.34018	0.252318
ENSG00000123124	WWP1	6.11082	6.39602	3.37384	5.00281	3.53579	5.23454	4.91163	6.39602	4.20954	5.00281	4.61703	5.23454	6.69861	6.39602	6.09671	5.00281	6.48481	5.23454
ENSG00000113140	SPARC	0.0987856	0.101173	0.083704	0.0514149	0.155299	0.20472	0.0813244	0.101173	0.0538453	0.0514149	0.138761	0.20472	0.0717373	0.101173	0.0577329	0.0514149	0.209897	0.20472
ENSG00000184113	CLDN5	0.102869	0.0929603	0.0375224	0.0167161	0.0559708	0.013415	0.0904541	0.0929603	0.0657461	0.0167161	0.0597347	0.013415	0.0471651	0.0929603	0.040669	0.0167161	0.0118286	0.013415
ENSG00000184110	EIF3C	60.9194	63.3322	40.5943	58.0175	36.1322	67.5968	60.4045	63.3322	38.5459	58.0175	32.8733	67.5968	60.0504	63.3322	57.5465	58.0175	54.8949	67.5968
ENSG00000163239	TDRD10	0.230036	0.329834	0.142644	0.17652	0.283701	0.356985	0.252168	0.329834	0.185851	0.17652	0.282135	0.356985	0.187839	0.329834	0.240497	0.17652	0.337254	0.356985
ENSG00000168229	PTGDR	0.0136823	0	0	0	0.0057526	0.0151665	0.0272704	0	0	0	0.00613944	0.0151665	0.0152352	0	0.00766315	0	0	0.0151665
ENSG00000168228	ZCCHC4	2.52156	2.25054	1.47366	1.94445	1.6153	2.0765	2.45588	2.25054	1.41427	1.94445	1.85653	2.0765	2.62198	2.25054	2.6163	1.94445	1.7238	2.0765
ENSG00000163235	TGFA	0.192316	0.115609	0.281469	0.0615968	0.224995	0.176103	0.141657	0.115609	0.373881	0.0615968	0.285148	0.176103	0.125693	0.115609	0.0561974	0.0615968	0.11033	0.176103
ENSG00000166049	PASD1	0.00468486	0	0	0	0	0	0	0	0	0	0	0	0.00521657	0	0	0	0	0
ENSG00000162545	CAMK2N1	0.0158694	0.016253	0.288186	0.0876783	0.100082	0.0791588	0	0.016253	0.145897	0.0876783	0.17802	0.0791588	0.114858	0.016253	0.0355523	0.0876783	0	0.0791588
ENSG00000166046	TCP11L2	0.129722	0.0842512	0.280278	0.131106	0.351187	0.515554	0.204949	0.0842512	0.267082	0.131106	0.366286	0.515554	0.200814	0.0842512	0.163029	0.131106	0.683429	0.515554
ENSG00000162542	TMCO4	2.59494	2.90926	1.79998	2.55917	2.65545	2.41688	2.43808	2.90926	1.47581	2.55917	2.21393	2.41688	2.26825	2.90926	1.94928	2.55917	1.77089	2.41688
ENSG00000162543	UBXN10	0.700209	0.465372	0.125375	0.394409	0.0814285	0.491295	0.337763	0.465372	0.115176	0.394409	0.076877	0.491295	0.34422	0.465372	0.43389	0.394409	0.382234	0.491295
ENSG00000268563	MECP2	0	0	0	0	0	0	0	0	0	0	0	0	0	0	0	0	0	0
ENSG00000268569	HIRA	0	0	0	0	0	0	0	0	0	0	0	0	0	0	0	0	0	0
ENSG00000245888	CTD-3203P2.2	0.200415	0.0962152	0.0277402	0.0749729	0.00526641	0.23604	0.156035	0.0962152	0.0471102	0.0749729	0.0112411	0.23604	0.0627642	0.0962152	0.112248	0.0749729	0.232613	0.23604
ENSG00000204010	IFIT1B	0.0105219	0	0	0	0.0353907	0.0116633	0.0209714	0	0	0	0.0188853	0.0116633	0	0	0.0353585	0	0.102841	0.0116633
ENSG00000204019	CT83	0	0	0	0	0	0	0	0	0	0	0	0	0	0	0	0	0	0
ENSG00000168528	SERINC2	1.09052	1.53343	0.302863	1.55241	0.366797	2.14972	1.30411	1.53343	0.300525	1.55241	0.391463	2.14972	1.16177	1.53343	0.660293	1.55241	0.754747	2.14972
ENSG00000254087	LYN	58.6878	51.726	33.3967	37.8083	37.7912	43.6919	84.2325	51.726	36.2095	37.8083	40.5737	43.6919	77.6758	51.726	51.772	37.8083	46.0811	43.6919
ENSG00000158113	LRRC43	0.00747721	0.0689213	0	0	0.0125749	0.0082883	0.0149029	0.0689213	0	0	0.00671025	0.0082883	0.0166517	0.0689213	0.00837561	0	0.0219246	0.0082883
ENSG00000137776	SLTM	11.0754	10.1786	6.5415	8.05066	5.67257	9.663	9.33885	10.1786	7.8662	8.05066	7.09271	9.663	12.4741	10.1786	10.8618	8.05066	10.5441	9.663
ENSG00000137770	CTDSPL2	7.61057	8.00998	2.05392	7.07921	2.16629	7.82929	7.45599	8.00998	2.86907	7.07921	2.84179	7.82929	8.75879	8.00998	8.00074	7.07921	6.98739	7.82929
ENSG00000130204	TOMM40	52.6951	54.1452	40.8804	44.6384	37.3843	24.3125	55.1084	54.1452	37.8109	44.6384	32.2488	24.3125	47.4372	54.1452	37.2392	44.6384	16.6006	24.3125
ENSG00000130201	EXOC3L2	0.0841999	0.110873	0.0319663	0.0110763	0.0303437	0.346667	0.0359614	0.110873	0.0301596	0.0110763	0.0107947	0.346667	0.0803624	0.110873	0.0404214	0.0110763	0.24689	0.346667
ENSG00000130202	PVRL2	42.2904	46.2503	41.6618	70.501	36.3993	65.8696	46.83	46.2503	33.1285	70.501	33.1569	65.8696	42.7924	46.2503	61.3344	70.501	70.4909	65.8696
ENSG00000130203	APOE	101.133	91.3074	129.931	87.2658	133.712	100.461	94.5271	91.3074	109.892	87.2658	111.207	100.461	84.6345	91.3074	101.816	87.2658	149.913	100.461
ENSG00000011275	RNF216	10.7464	10.7132	5.22059	9.73509	5.99984	9.80497	10.4407	10.7132	5.00064	9.73509	5.99761	9.80497	10.5468	10.7132	8.39823	9.73509	7.54353	9.80497
ENSG00000157837	SPPL3	4.40673	4.81263	4.87616	4.66209	5.73481	4.90543	4.54341	4.81263	5.22957	4.66209	5.55949	4.90543	4.53288	4.81263	4.61223	4.66209	5.06398	4.90543
ENSG00000130208	APOC1	90.2113	81.1533	64.2053	63.7765	64.0644	74.9603	81.9889	81.1533	59.9848	63.7765	56.0746	74.9603	77.4206	81.1533	84.2463	63.7765	123.592	74.9603
ENSG00000157833	GAREML	1.84469	2.0002	0.752062	1.75012	0.846088	1.46388	1.9602	2.0002	0.735836	1.75012	0.918662	1.46388	1.80118	2.0002	1.12318	1.75012	0.843444	1.46388
ENSG00000163714	U2SURP	8.48558	7.8705	3.47861	6.86327	3.78544	7.26017	7.39291	7.8705	4.223	6.86327	5.00261	7.26017	10.4099	7.8705	9.39198	6.86327	8.20939	7.26017
ENSG00000165533	TTC8	2.05529	2.15859	1.63512	1.60326	1.77779	1.81388	1.58508	2.15859	1.46612	1.60326	2.22041	1.81388	2.25211	2.15859	2.46354	1.60326	2.16877	1.81388
ENSG00000161091	MFSD12	40.197	41.5793	53.8044	42.3697	41.4782	39.1397	36.9591	41.5793	43.1326	42.3697	36.3244	39.1397	35.0438	41.5793	41.076	42.3697	34.1309	39.1397
ENSG00000111364	DDX55	5.85366	6.28894	2.44796	3.9457	2.54966	3.36507	5.63809	6.28894	2.62221	3.9457	2.63639	3.36507	6.93449	6.28894	4.68995	3.9457	3.24043	3.36507
ENSG00000205057	CLLU1OS	0	0	0	0	0.0254339	0.0335277	0	0	0	0	0	0.0335277	0	0	0	0	0	0.0335277
ENSG00000121388	RP11-408E5.4	0	0	0	0	0	0	0	0	0	0	0	0	0	0	0	0	0	0
ENSG00000121381	TAS2R9	0	0.0395363	0	0	0	0	0	0.0395363	0	0	0	0	0	0.0395363	0	0	0	0
ENSG00000121380	BCL2L14	0.00405893	0.00415703	0	0.0112128	0.00682615	0.0134977	0.0161798	0.00415703	0	0.0112128	0	0.0134977	0	0.00415703	0	0.0112128	0	0.0134977
ENSG00000178381	ZFAND2A	11.1888	9.7077	14.5852	9.24754	11.1677	7.77423	11.0324	9.7077	13.6621	9.24754	11.3718	7.77423	10.9899	9.7077	9.42532	9.24754	10.6247	7.77423
ENSG00000042429	MED17	3.87713	3.77357	3.01652	2.92992	2.83425	2.9612	3.3724	3.77357	3.25169	2.92992	3.28239	2.9612	3.61371	3.77357	3.49293	2.92992	3.16449	2.9612
ENSG00000178385	PLEKHM3	0.42782	0.506622	0.655323	0.533473	0.580838	0.523626	0.586226	0.506622	0.52517	0.533473	0.691886	0.523626	0.525997	0.506622	0.454264	0.533473	0.492196	0.523626
ENSG00000178386	ZNF223	0.991028	1.2001	1.10427	1.24546	1.1478	1.51998	1.06215	1.2001	1.53675	1.24546	1.77875	1.51998	1.33253	1.2001	1.61977	1.24546	2.1261	1.51998
ENSG00000171867	PRNP	23.5658	23.9117	9.91562	15.3402	9.54081	23.8955	20.2644	23.9117	10.736	15.3402	11.1425	23.8955	23.7444	23.9117	16.5085	15.3402	23.5666	23.8955
ENSG00000171865	RNASEH1	10.5159	10.9554	7.41	8.76968	7.17393	6.2939	11.1148	10.9554	7.79624	8.76968	7.31189	6.2939	10.411	10.9554	8.25853	8.76968	6.28581	6.2939
ENSG00000171864	PRND	0	0.00533938	0	0.00480064	0	0	0.00519543	0.00533938	0.00871447	0.00480064	0	0	0	0.00533938	0	0.00480064	0	0
ENSG00000171863	RPS7	122.117	127.824	54.0061	94.0201	44.8269	95.9014	116.989	127.824	55.0353	94.0201	44.1459	95.9014	121.989	127.824	100.038	94.0201	92.8974	95.9014
ENSG00000171862	PTEN	20.9041	21.6166	8.9141	14.1607	11.6671	20.8392	18.4162	21.6166	10.2052	14.1607	14.2807	20.8392	23.8607	21.6166	16.0531	14.1607	20.3408	20.8392
ENSG00000171861	RNMTL1	5.40586	5.46447	3.25778	6.03268	3.48108	4.277	5.54746	5.46447	3.89665	6.03268	4.148	4.277	5.51591	5.46447	4.29955	6.03268	3.3293	4.277
ENSG00000171860	C3AR1	3.0084	2.0904	9.33171	3.89257	15.6012	3.22751	5.04172	2.0904	8.78004	3.89257	15.3742	3.22751	3.94225	2.0904	9.14523	3.89257	7.40299	3.22751
ENSG00000041880	PARP3	1.38895	1.4951	1.30573	1.7684	2.0439	2.83573	1.22174	1.4951	1.01279	1.7684	2.06687	2.83573	1.18362	1.4951	1.68285	1.7684	2.16793	2.83573
ENSG00000273310	PCDHB14	0	0	0	0	0	0	0	0	0	0	0	0	0	0	0	0	0	0
ENSG00000273316	MBOAT7	0	0	0	0	0	0	0	0	0	0	0	0	0	0	0	0	0	0
ENSG00000174982	OR4S2	0	0	0	0	0	0	0	0	0	0	0	0	0	0	0	0	0	0
ENSG00000273315	LENG1	0	0	0	0	0	0	0	0	0	0	0	0	0	0	0	0	0	0
ENSG00000174989	FBXW8	3.72515	3.66718	1.90598	2.23631	2.15015	2.8255	3.77633	3.66718	1.77813	2.23631	1.72916	2.8255	3.64285	3.66718	2.49555	2.23631	2.45607	2.8255
ENSG00000134453	RBM17	9.19963	9.28954	4.97672	7.64084	5.19977	6.35287	9.358	9.28954	5.70315	7.64084	5.76991	6.35287	9.8694	9.28954	7.62192	7.64084	5.95864	6.35287
ENSG00000134452	FBXO18	7.4785	6.92044	6.4064	7.93748	7.33021	6.86256	7.49218	6.92044	6.34704	7.93748	7.25225	6.86256	6.89364	6.92044	7.68834	7.93748	6.48241	6.86256
ENSG00000124802	EEF1E1	4.29363	3.9738	1.65749	3.26453	1.55679	4.62839	3.24839	3.9738	2.27986	3.26453	1.86474	4.62839	4.51776	3.9738	4.46756	3.26453	3.12818	4.62839
ENSG00000161328	LRRC56	1.35631	2.05677	2.86762	1.26273	2.52042	1.44529	1.32923	2.05677	2.22331	1.26273	2.16538	1.44529	1.4268	2.05677	1.28425	1.26273	1.31832	1.44529
ENSG00000161326	DUSP14	10.4452	10.332	84.2611	14.1904	57.2581	17.2385	9.16807	10.332	77.7917	14.1904	57.9417	17.2385	9.18065	10.332	18.3781	14.1904	31.7878	17.2385
ENSG00000160058	BSDC1	6.89107	6.89506	10.9229	7.48429	11.2193	8.313	7.71422	6.89506	10.0486	7.48429	11.0509	8.313	7.36757	6.89506	7.80794	7.48429	10.7849	8.313
ENSG00000215048	HLA-DPB1	0	0	0	0	0	0	0	0	0	0	0	0	0	0	0	0	0	0
ENSG00000215046	TCP11X1	0.00731897	0.0224876	0	0	0	0.0324515	0	0.0224876	0	0	0	0.0324515	0	0.0224876	0	0	0.00715352	0.0324515
ENSG00000160055	TMEM234	2.61755	2.66895	4.28351	3.2422	5.08382	2.90148	2.53351	2.66895	3.78489	3.2422	4.42267	2.90148	2.37297	2.66895	2.98394	3.2422	2.71686	2.90148
ENSG00000243317	C7orf73	12.7811	11.3977	11.1404	11.7488	10.062	11.5246	10.9744	11.3977	12.2301	11.7488	10.8033	11.5246	12.3424	11.3977	13.4038	11.7488	12.6657	11.5246
ENSG00000215045	GRID2IP	0.0200767	0	0	0.0369745	0.0211026	0.0611999	0.0100038	0	0.00419492	0.0369745	0.0225217	0.0611999	0.0111776	0	0.00562224	0.0369745	0	0.0611999
ENSG00000160050	CCDC28B	0.404971	0.542957	0.241336	0.339009	0.321958	0.856992	0.565007	0.542957	0.307697	0.339009	0.290746	0.856992	0.614909	0.542957	0.371151	0.339009	0.618914	0.856992
ENSG00000160051	IQCC	1.43878	1.80719	0.392783	1.54152	0.570681	1.42434	0.946868	1.80719	0.287391	1.54152	0.552213	1.42434	0.957217	1.80719	0.790624	1.54152	1.11439	1.42434
ENSG00000215041	NEURL4	3.1746	3.07567	3.72081	3.65099	3.41317	2.41556	3.92443	3.07567	3.45993	3.65099	3.46766	2.41556	2.97321	3.07567	3.22454	3.65099	2.12006	2.41556
ENSG00000042286	AIFM2	3.7123	3.33402	11.9182	2.25287	9.52462	1.96336	4.62238	3.33402	10.8221	2.25287	9.33406	1.96336	3.96252	3.33402	2.78582	2.25287	2.11458	1.96336
ENSG00000175581	MRPL48	2.46001	2.66967	1.16503	2.47	1.61906	2.00319	2.30068	2.66967	1.22966	2.47	1.41376	2.00319	2.23351	2.66967	2.18857	2.47	1.74319	2.00319
ENSG00000175582	RAB6A	23.4362	22.2621	22.3976	23.009	24.4573	27.6179	21.8984	22.2621	27.1355	23.009	30.0308	27.6179	24.6992	22.2621	27.5148	23.009	29.9978	27.6179
ENSG00000036530	CYP46A1	0.0177458	0.0159028	0.013755	0.0142983	0.0205178	0.0122942	0.0176847	0.0159028	0.0129776	0.0142983	0.025879	0.0122942	0.00493996	0.0159028	0.00745424	0.0142983	0.0130085	0.0122942
ENSG00000177984	LCN15	0	0.00736084	0	0	0.00604352	0	0	0.00736084	0	0	0.00644993	0	0	0.00736084	0	0	0	0
ENSG00000065989	PDE4A	3.4884	3.33282	18.0846	3.84202	11.2869	4.43453	3.26164	3.33282	19.0436	3.84202	11.6647	4.43453	3.03234	3.33282	2.984	3.84202	4.35884	4.43453
ENSG00000177981	ASB8	3.68075	3.44213	3.51242	4.38511	4.10683	4.30512	3.74396	3.44213	3.46666	4.38511	4.32377	4.30512	3.79322	3.44213	4.07181	4.38511	3.76129	4.30512
ENSG00000237896	AC005008.2	0	0	0	0	0	0	0	0	0	0	0	0	0	0	0	0	0	0
ENSG00000175634	RPS6KB2	7.49685	7.59033	9.18242	11.3456	9.80848	7.93432	7.89064	7.59033	7.83139	11.3456	8.57556	7.93432	6.97297	7.59033	9.30892	11.3456	6.90539	7.93432
ENSG00000135324	MRAP2	0.742078	0.296109	0.443936	0.124241	0.291739	0.0854622	0.41298	0.296109	0.676596	0.124241	0.536228	0.0854622	0.493633	0.296109	0.226702	0.124241	0.339103	0.0854622
ENSG00000147400	CETN2	6.016	6.19446	11.5356	7.55145	14.4884	4.46162	5.08365	6.19446	12.6645	7.55145	15.2309	4.46162	5.77605	6.19446	9.34274	7.55145	7.03707	4.46162
ENSG00000147402	GABRQ	0	0	0	0.00618936	0	0	0.00669835	0	0.00561768	0.00618936	0	0	0	0	0	0.00618936	0	0
ENSG00000147403	RPL10	179.016	188.936	97.6555	158.194	81.8285	173.27	186.974	188.936	88.0855	158.194	72.3997	173.27	183.713	188.936	146.588	158.194	164.112	173.27
ENSG00000131669	NINJ1	35.7941	29.7334	44.4592	20.427	52.3099	24.3984	59.23	29.7334	41.7893	20.427	44.4849	24.3984	47.7091	29.7334	26.7884	20.427	25.58	24.3984
ENSG00000131668	BARX1	27.7124	37.3443	6.19933	41.0856	6.60181	38.9291	24.2172	37.3443	5.05802	41.0856	6.7417	38.9291	21.2309	37.3443	24.1453	41.0856	20.9768	38.9291
ENSG00000213265	TSGA13	0.0367406	0.0188143	0	0	0	0.020363	0	0.0188143	0	0	0	0.020363	0	0.0188143	0	0	0	0.020363
ENSG00000221974	GTF2H4	0	0	0	0	0	0	0	0	0	0	0	0	0	0	0	0	0	0
ENSG00000221977	OR4E2	0.0440536	0	0	0.0405659	0	0	0	0	0	0.0405659	0	0	0	0	0	0.0405659	0	0
ENSG00000003137	CYP26B1	0.376507	0.34747	1.04456	0.864843	1.14114	0.449452	0.366964	0.34747	1.04777	0.864843	1.17332	0.449452	0.460702	0.34747	0.644204	0.864843	0.315425	0.449452
ENSG00000221970	OR2A1	0.133436	0.113884	0.0394012	0.102393	0	0.172562	0.0886508	0.113884	0.0371743	0.102393	0.0399163	0.172562	0.0495267	0.113884	0.124557	0.102393	0.304312	0.172562
ENSG00000248099	INSL3	0	0	0	0	0	0	0	0	0	0	0	0	0	0	0	0	0	0
ENSG00000132313	MRPL35	9.48863	9.30726	6.58612	8.5478	7.473	6.22304	9.06713	9.30726	7.82622	8.5478	8.22356	6.22304	9.76905	9.30726	10.1795	8.5478	5.93735	6.22304
ENSG00000221978	CCNL2	11.2383	11.6498	6.20666	9.86776	6.08306	10.4821	11.0272	11.6498	6.32525	9.86776	6.58748	10.4821	11.4017	11.6498	9.94982	9.86776	11.6548	10.4821
ENSG00000237763	AMY1A	0.10781	0.186857	0.0440783	0.763651	0.0488143	0.652679	0.198348	0.186857	0.0485182	0.763651	0.126521	0.652679	0.00923429	0.186857	1.31911	0.763651	1.4428	0.652679
ENSG00000177673	C2orf57	0	0	0	0	0	0	0	0	0	0	0	0	0	0	0	0	0	0
ENSG00000177674	AGTRAP	13.2273	14.3244	15.7063	19.4757	21.1767	16.7324	15.4595	14.3244	13.5427	19.4757	18.0775	16.7324	12.5729	14.3244	11.2343	19.4757	10.8861	16.7324
ENSG00000177675	CD163L1	0.751204	0.627438	2.50674	0.601067	3.94335	0.501231	0.58145	0.627438	2.57231	0.601067	3.51147	0.501231	0.617194	0.627438	1.01302	0.601067	0.702145	0.501231
ENSG00000237765	FAM200B	4.57888	4.27044	3.58684	4.64872	5.41865	5.41935	4.06087	4.27044	3.96733	4.64872	5.40034	5.41935	4.57095	4.27044	4.79129	4.64872	4.91744	5.41935
ENSG00000177679	SRRM3	0.108603	0.157573	0.034741	0.127784	0.114153	0.13376	0.0962038	0.157573	0.0378201	0.127784	0.0730976	0.13376	0.184753	0.157573	0.0946183	0.127784	0.067817	0.13376
ENSG00000272196	HIST2H2AA3	0	0	0	0	0	0	0	0	0	0	0	0	0	0	0	0	0	0
ENSG00000272195	RP11-156E8.1	1.15738	1.16091	0.243102	0.977851	0.561856	1.28292	0.927469	1.16091	0.339057	0.977851	0.653178	1.28292	1.07616	1.16091	0.494517	0.977851	0.897974	1.28292
ENSG00000172009	THOP1	13.0462	14.1618	8.35833	17.8892	8.51808	10.3058	13.3198	14.1618	7.89912	17.8892	7.13602	10.3058	12.0398	14.1618	14.2778	17.8892	7.8259	10.3058
ENSG00000172000	ZNF556	0.920229	1.05866	0.167503	1.14918	0.0954002	0.866344	0.640685	1.05866	0.168571	1.14918	0.113128	0.866344	0.912377	1.05866	0.889591	1.14918	0.566762	0.866344
ENSG00000172005	MAL	0	0	0	0	0	0	0	0	0	0	0	0	0	0	0	0	0.027915	0
ENSG00000172006	ZNF554	0.624471	0.889038	0.584571	0.95023	0.670346	1.06532	0.635561	0.889038	0.462694	0.95023	0.612086	1.06532	0.527673	0.889038	0.952513	0.95023	0.917696	1.06532
ENSG00000172007	RAB33B	1.39897	1.16651	0.939504	0.908207	0.905694	1.107	1.18441	1.16651	0.931242	0.908207	1.08511	1.107	1.34177	1.16651	0.998477	0.908207	1.01643	1.107
ENSG00000188277	C15orf62	0.751482	0.761093	0.406815	0.876518	0.344038	0.694166	0.7905	0.761093	0.488501	0.876518	0.547013	0.694166	0.818176	0.761093	0.617301	0.876518	0.905877	0.694166
ENSG00000198805	PNP	121.022	136.566	116.674	146.302	85.5731	114.711	102.73	136.566	111.903	146.302	84.9662	114.711	107.901	136.566	131.553	146.302	108.04	114.711
ENSG00000188279	FAM25C	0.0432276	0	0	0	0	0.0479167	0	0	0	0	0	0.0479167	0	0	0	0	0	0.0479167
ENSG00000069869	NEDD4	1.76997	1.5114	1.22645	1.86928	1.40011	2.60922	1.77069	1.5114	1.66612	1.86928	1.72761	2.60922	2.19689	1.5114	2.43997	1.86928	2.96947	2.60922
ENSG00000259900	RP11-343C2.7	4.80539	3.75515	3.81392	4.88534	3.17654	3.60241	3.98608	3.75515	3.71444	4.88534	4.2377	3.60241	3.74244	3.75515	3.70259	4.88534	2.82348	3.60241
ENSG00000115816	CEBPZ	15.5348	15.635	7.9874	9.43482	8.66852	7.96667	14.6095	15.635	9.70548	9.43482	9.33356	7.96667	21.4107	15.635	14.2823	9.43482	8.98611	7.96667
ENSG00000071991	CDH19	0.00604582	0	0	0.00278359	0	0	0	0	0	0.00278359	0	0	0	0	0	0.00278359	0.00295458	0
ENSG00000071994	PDCD2	16.9589	16.4139	8.64821	13.1055	9.37042	14.6751	16.2906	16.4139	9.89735	13.1055	9.89992	14.6751	16.6324	16.4139	15.4757	13.1055	11.947	14.6751
ENSG00000118997	DNAH7	0.0252992	0.0289004	0.0396506	0.0313604	0.0335468	0.0366723	0.0203636	0.0289004	0.0227711	0.0313604	0.0445352	0.0366723	0.0227531	0.0289004	0.0403285	0.0313604	0.0485036	0.0366723
ENSG00000272739	TSEN34	0	0	0	0	0	0	0	0	0	0	0	0	0	0	0	0	0	0
ENSG00000157429	ZNF19	0.00259918	0.005324	0.0184198	0.00957362	0.00874239	0.0172868	0.0103609	0.005324	0.00217234	0.00957362	0.00466515	0.0172868	0.0115767	0.005324	0.0116459	0.00957362	0.0101617	0.0172868
ENSG00000272731	PCDHB1	0	0	0	0	0	0	0	0	0	0	0	0	0	0	0	0	0	0
ENSG00000138018	EPT1	6.47258	5.69911	4.15958	5.50513	3.46537	4.21739	6.40905	5.69911	5.26927	5.50513	5.27782	4.21739	7.23429	5.69911	7.92377	5.50513	4.69176	4.21739
ENSG00000188859	FAM78B	0.0272402	0.0637681	0.00689446	0.0143335	0.0229057	0	0.0310245	0.0637681	0	0.0143335	0.034923	0	0.0173325	0.0637681	0	0.0143335	0.00380349	0
ENSG00000146469	VIP	0	0	0	0	0	0	0	0	0	0	0	0	0	0	0	0	0	0
ENSG00000136144	RCBTB1	2.74716	2.56855	1.72363	2.82339	2.34021	3.5711	2.47546	2.56855	2.04609	2.82339	2.86256	3.5711	2.79257	2.56855	3.61319	2.82339	3.558	3.5711
ENSG00000136147	PHF11	5.23339	4.71458	2.04651	2.92065	2.60219	4.73684	5.32215	4.71458	2.32848	2.92065	3.11182	4.73684	5.43123	4.71458	5.62214	2.92065	4.49508	4.73684
ENSG00000136146	MED4	13.1025	13.6895	9.65802	11.66	11.4172	10.9245	11.7946	13.6895	11.3332	11.66	12.7377	10.9245	14.2074	13.6895	13.5432	11.66	12.4279	10.9245
ENSG00000136141	LRCH1	5.2079	4.98187	8.44951	6.09778	6.80522	7.5009	6.08703	4.98187	9.71159	6.09778	8.83775	7.5009	6.35863	4.98187	9.46615	6.09778	10.1526	7.5009
ENSG00000136143	SUCLA2	6.18203	6.03395	4.45194	5.67746	5.01861	4.69599	5.9095	6.03395	5.15307	5.67746	5.75449	4.69599	7.24371	6.03395	7.07829	5.67746	4.6442	4.69599
ENSG00000196800	SPINK14	0	0	0	0	0	0	0	0	0	0	0	0	0	0	0	0	0	0
ENSG00000196805	SPRR2B	0	0	0	0	0	0	0.117488	0	0	0	0	0	0	0	0	0	0	0
ENSG00000172915	NBEA	0.0139012	0.00889822	0.00615715	0.00640032	0.0277619	0.0115568	0.015585	0.00889822	0.0130706	0.00640032	0.0327476	0.0115568	0.00773945	0.00889822	0.00973215	0.00640032	0.0169837	0.0115568
ENSG00000144191	CNGA3	0.00947888	0.00485398	0	0	0	0.0157606	0	0.00485398	0.00792224	0	0.00850659	0.0157606	0	0.00485398	0	0	0	0.0157606
ENSG00000144199	FAHD2B	1.25493	1.82012	0.248574	1.49292	0.471912	2.6266	1.46034	1.82012	0.267097	1.49292	0.468671	2.6266	1.31057	1.82012	0.995351	1.49292	2.03412	2.6266
ENSG00000077279	DCX	0.00818592	0.00628782	0.00181286	0.00376892	0	0	0.00407886	0.00628782	0	0.00376892	0.00367313	0	0	0.00628782	0	0.00376892	0	0
ENSG00000085117	CD82	49.9845	43.6547	60.4874	44.34	40.4945	33.1384	77.8453	43.6547	60.9871	44.34	37.3062	33.1384	59.7438	43.6547	33.7742	44.34	26.3333	33.1384
ENSG00000077274	CAPN6	0.00581538	0	0.010303	0.01071	0.0146701	0.0257848	0.017386	0	0	0.01071	0	0.0257848	0.0129508	0	0.0130282	0.01071	0	0.0257848
ENSG00000174514	MFSD4	0.0707785	0.0419673	0.0362993	0.013721	0.0375891	0.061939	0.06311	0.0419673	0.0249074	0.013721	0.0100292	0.061939	0.0373317	0.0419673	0.0125183	0.013721	0.0546146	0.061939
ENSG00000110944	IL23A	1.53477	1.06152	1.02409	1.1196	0.469293	3.11528	4.52886	1.06152	1.46597	1.1196	0.697614	3.11528	4.86053	1.06152	2.05408	1.1196	5.59118	3.11528
ENSG00000174516	PELI3	1.38437	1.57971	1.73329	1.68632	2.0807	2.46494	1.38504	1.57971	1.41668	1.68632	1.81954	2.46494	1.40798	1.57971	1.75828	1.68632	1.99766	2.46494
ENSG00000203705	TATDN3	1.91717	1.91301	1.13059	2.80445	1.15151	4.21991	1.76318	1.91301	1.0438	2.80445	1.57305	4.21991	1.86639	1.91301	3.57716	2.80445	4.10637	4.21991
ENSG00000116731	PRDM2	5.1346	4.91045	4.06383	3.77303	3.6483	4.31027	5.05256	4.91045	4.93597	3.77303	4.45791	4.31027	5.6687	4.91045	3.83436	3.77303	4.02522	4.31027
ENSG00000112893	MAN2A1	4.83828	4.80412	2.73493	5.27998	2.54294	5.69793	3.63852	4.80412	3.0882	5.27998	3.41686	5.69793	4.63257	4.80412	5.11665	5.27998	5.65237	5.69793
ENSG00000088448	ANKRD10	23.1853	19.7585	13.488	14.6957	12.1908	20.6985	21.5218	19.7585	15.6864	14.6957	15.1762	20.6985	24.61	19.7585	20.4575	14.6957	25.6073	20.6985
ENSG00000269027	AC010368.2	0	0	0	0	0	0	0	0	0	0	0	0	0	0	0	0	0	0
ENSG00000269026	AC003006.7	2.83964	2.78071	3.24364	3.41762	2.59725	3.17527	2.48233	2.78071	3.28932	3.41762	3.46488	3.17527	2.66267	2.78071	2.98551	3.41762	3.23802	3.17527
ENSG00000072310	SREBF1	5.82033	6.1804	2.97922	12.0928	3.0255	13.1609	5.6228	6.1804	2.80221	12.0928	2.34875	13.1609	6.36881	6.1804	7.75419	12.0928	11.8215	13.1609
ENSG00000072315	TRPC5	0.0213214	0.0145578	0	0.00981669	0.00597624	0.0354513	0	0.0145578	0.01188	0.00981669	0.0191344	0.0354513	0.0158275	0.0145578	0.0159221	0.00981669	0.0312591	0.0354513
ENSG00000269020	CR753864.1	0	0	0	0	0	0	0	0	0	0	0	0	0	0	0	0	0	0
ENSG00000269028	MTRNR2L12	0.427191	0.541685	0.180202	0.543226	0.171055	0.631373	1.11498	0.541685	0.357037	0.543226	0.255581	0.631373	0.475674	0.541685	0.751957	0.543226	0.377769	0.631373
ENSG00000262907	KIF5C	0	0	0	0	0	0	0	0	0	0	0	0	0	0	0	0	0	0
ENSG00000262900	LILRA1	0	0	0	0	0	0	0	0	0	0	0	0	0	0	0	0	0	0
ENSG00000223465	LST1	0	0	0	0	0	0	0	0	0	0	0	0	0	0	0	0	0	0
ENSG00000139053	PDE6H	0.0277768	0.113792	0.0984238	0.102311	0.140142	0.0307899	0.138406	0.113792	0.116076	0.102311	0	0.0307899	0.0927879	0.113792	0.155571	0.102311	0.0814467	0.0307899
ENSG00000262909	SMURF2	0	0	0	0	0	0	0	0	0	0	0	0	0	0	0	0	0	0
ENSG00000262908	TAS2R30	0	0	0	0	0	0	0	0	0	0	0	0	0	0	0	0	0	0
ENSG00000139055	ERP27	0.273692	0.166432	0.0757652	0.354409	0.143839	0.2939	0.178992	0.166432	0.135818	0.354409	0.222592	0.2939	0.190471	0.166432	0.316157	0.354409	0.267505	0.2939
ENSG00000151748	SAV1	5.44714	4.70309	4.72085	3.5057	5.04525	4.41208	5.90217	4.70309	5.71078	3.5057	6.5289	4.41208	6.04484	4.70309	4.61957	3.5057	4.77648	4.41208
ENSG00000236967	RNF39	0	0	0	0	0	0	0	0	0	0	0	0	0	0	0	0	0	0
ENSG00000151743	AMN1	1.0196	0.831406	1.00101	0.932902	1.03211	1.12301	1.11317	0.831406	1.20497	0.932902	1.33465	1.12301	1.33057	0.831406	1.3749	0.932902	1.41549	1.12301
ENSG00000151746	BICD1	1.0841	1.02018	1.66034	0.915624	1.48579	1.05149	0.975136	1.02018	1.6827	0.915624	2.05004	1.05149	0.909274	1.02018	1.30701	0.915624	1.17656	1.05149
ENSG00000140443	IGF1R	1.15043	1.13104	0.83134	1.66753	0.959626	1.5885	1.073	1.13104	0.878065	1.66753	1.20059	1.5885	1.05695	1.13104	1.18543	1.66753	1.52976	1.5885
ENSG00000170876	TMEM43	32.6342	32.2926	22.137	29.2375	20.2172	29.2716	32.215	32.2926	22.9686	29.2375	19.9972	29.2716	32.4895	32.2926	30.2892	29.2375	33.0774	29.2716
ENSG00000170873	MTSS1	32.6947	25.901	109.788	26.3767	116.014	37.1805	37.1096	25.901	122.009	26.3767	128.976	37.1805	37.0848	25.901	49.0933	26.3767	69.1095	37.1805
ENSG00000170871	KIAA0232	11.8211	10.8116	10.4804	11.7081	11.5414	13.8937	10.8316	10.8116	11.1307	11.7081	15.1307	13.8937	12.3336	10.8116	12.5086	11.7081	15.8705	13.8937
ENSG00000143867	OSR1	0	0.00799952	0.00691912	0	0.0131358	0	0	0.00799952	0	0	0	0	0	0.00799952	0.00874923	0	0.00381709	0
ENSG00000013619	MAMLD1	0.480597	0.460112	2.67164	0.548375	2.2754	0.737329	0.569178	0.460112	2.67782	0.548375	2.86909	0.737329	0.496364	0.460112	0.596857	0.548375	1.04499	0.737329
ENSG00000228001	TRIM40	0	0	0	0	0	0	0	0	0	0	0	0	0	0	0	0	0	0
ENSG00000117069	ST6GALNAC5	0	0.0199397	0.00862333	0.0089639	0	0.0107905	0.00970106	0.0199397	0.00813596	0.0089639	0	0.0107905	0	0.0199397	0	0.0089639	0.00951453	0.0107905
ENSG00000228008	CTD-2330K9.3	0	0.0692206	0	0.0414909	0.0568327	0.0499458	0	0.0692206	0.0188293	0.0414909	0.0202182	0.0499458	0.0752579	0.0692206	0.0504719	0.0414909	0.0220198	0.0499458
ENSG00000113761	ZNF346	3.51135	3.6733	2.20834	3.64109	2.07018	3.28852	3.1683	3.6733	1.9096	3.64109	2.03058	3.28852	3.21467	3.6733	3.03549	3.64109	2.69624	3.28852
ENSG00000113763	UNC5A	0.066672	0.0195095	0.130778	0.135943	0.0800901	0.142529	0.0237294	0.0195095	0.111446	0.135943	0.0769284	0.142529	0.0265139	0.0195095	0.0480103	0.135943	0.107056	0.142529
ENSG00000169379	ARL13B	2.64852	2.45712	1.68784	2.2092	1.76573	1.95169	2.60958	2.45712	2.29278	2.2092	2.12171	1.95169	3.03242	2.45712	2.88853	2.2092	2.00852	1.95169
ENSG00000140993	TIGD7	1.33978	1.16963	1.24377	1.17908	1.47995	1.46319	1.0839	1.16963	1.45445	1.17908	1.64159	1.46319	1.3432	1.16963	1.31247	1.17908	1.80236	1.46319
ENSG00000140992	PDPK1	10.9544	10.1909	9.87205	10.9016	10.4817	11.1371	10.3607	10.1909	9.98664	10.9016	11.8014	11.1371	9.89847	10.1909	9.69404	10.9016	9.75706	11.1371
ENSG00000064115	TM7SF3	13.4699	13.1833	10.566	17.1359	15.693	16.9187	11.5462	13.1833	10.7048	17.1359	16.1688	16.9187	11.9562	13.1833	13.9526	17.1359	14.819	16.9187
ENSG00000169372	CRADD	1.30047	1.28717	2.14068	1.13495	1.56686	1.71048	1.10739	1.28717	2.23464	1.13495	2.48657	1.71048	1.30218	1.28717	1.21756	1.13495	2.55163	1.71048
ENSG00000182108	DEXI	17.0862	17.8817	10.8021	16.3881	12.2296	14.8659	16.7992	17.8817	9.10394	16.3881	11.192	14.8659	15.4967	17.8817	14.3746	16.3881	11.3178	14.8659
ENSG00000140995	DEF8	3.75162	4.21778	5.92716	5.4453	7.26342	5.04844	3.51822	4.21778	4.91329	5.4453	6.7024	5.04844	3.47707	4.21778	4.94231	5.4453	4.68932	5.04844
ENSG00000169371	SNUPN	5.23453	4.93796	3.86328	4.79294	4.29243	4.23237	4.94597	4.93796	3.91621	4.79294	4.31629	4.23237	4.54724	4.93796	4.85207	4.79294	3.6569	4.23237
ENSG00000100632	ERH	61.2955	58.0922	59.769	60.7875	62.2922	45.8561	57.2594	58.0922	61.2872	60.7875	65.0179	45.8561	59.4314	58.0922	61.3061	60.7875	44.2837	45.8561
ENSG00000110492	MDK	0.984873	1.41998	0.423517	1.87544	0.538706	2.00323	0.819489	1.41998	0.455522	1.87544	0.669324	2.00323	1.09665	1.41998	1.58519	1.87544	2.66353	2.00323
ENSG00000110497	AMBRA1	5.23532	5.72188	5.59348	6.34976	6.22139	6.13594	4.91546	5.72188	5.38809	6.34976	5.94326	6.13594	4.77862	5.72188	6.06124	6.34976	5.89403	6.13594
ENSG00000111728	ST8SIA1	0.0100286	0.00293458	0.00888383	0.0158309	0.0325268	0.0111165	0.00713865	0.00293458	0.021553	0.0158309	0.0449998	0.0111165	0.00319052	0.00293458	0.0208624	0.0158309	0.00280056	0.0111165
ENSG00000111729	CLEC4A	0.113384	0.0829459	0.143487	0.0745767	0.0953422	0.0897737	0.193703	0.0829459	0.108302	0.0745767	0.0872175	0.0897737	0.216433	0.0829459	0.0544317	0.0745767	0.158316	0.0897737
ENSG00000111726	CMAS	12.719	12.405	21.0129	14.4388	25.0993	14.7939	12.9108	12.405	23.8471	14.4388	30.755	14.7939	13.2923	12.405	19.3609	14.4388	14.0595	14.7939
ENSG00000111727	HCFC2	1.57142	1.58861	1.16543	1.34606	1.35893	1.51233	1.43652	1.58861	1.38802	1.34606	1.556	1.51233	1.57344	1.58861	1.34178	1.34606	1.52002	1.51233
ENSG00000111725	PRKAB1	4.80362	4.86868	2.88687	4.12048	3.36326	3.67868	5.0453	4.86868	2.64875	4.12048	2.78748	3.67868	4.66079	4.86868	3.33415	4.12048	3.38328	3.67868
ENSG00000103489	XYLT1	17.259	16.7491	16.3111	11.2427	22.3122	16.4098	14.4974	16.7491	16.6783	11.2427	23.5469	16.4098	16.3917	16.7491	11.6127	11.2427	18.7413	16.4098
ENSG00000182103	FAM181B	0.201449	0.320939	0.0198281	0.206112	0.0846972	0.248112	0.167296	0.320939	0.0374149	0.206112	0.100437	0.248112	0.149542	0.320939	0.213117	0.206112	0.131264	0.248112
ENSG00000103485	QPRT	30.2105	34.596	27.531	32.2838	55.785	32.6	24.1897	34.596	20.928	32.2838	47.7313	32.6	25.2388	34.596	24.5434	32.2838	28.9048	32.6
ENSG00000142599	RERE	1.02276	1.29873	1.42373	1.60287	1.86717	2.92924	1.06957	1.29873	1.31914	1.60287	1.87941	2.92924	1.12478	1.29873	1.3477	1.60287	2.66395	2.92924
ENSG00000107902	LHPP	0.433978	0.486299	0.465848	0.277384	0.62681	0.379184	0.422308	0.486299	0.371244	0.277384	0.668961	0.379184	0.193293	0.486299	0.154415	0.277384	0.334344	0.379184
ENSG00000166747	AP1G1	11.0068	9.77274	10.6812	9.43755	11.4977	9.04792	10.0404	9.77274	12.1688	9.43755	13.7702	9.04792	11.5868	9.77274	10.9681	9.43755	10.1706	9.04792
ENSG00000106052	TAX1BP1	7.33328	7.59148	8.57381	7.29319	8.2917	9.61588	7.13374	7.59148	9.47281	7.29319	9.56739	9.61588	9.45935	7.59148	8.58471	7.29319	11.4455	9.61588
ENSG00000156219	ART3	0.0126597	0.0194485	0	0.0349723	0.0106453	0.0210494	0.0189242	0.0194485	0.00529036	0.0349723	0.0113612	0.0210494	0	0.0194485	0.0212712	0.0349723	0	0.0210494
ENSG00000156218	ADAMTSL3	0.00212726	0	0	0.00391769	0	0.00235801	0	0	0	0.00391769	0	0.00235801	0	0	0	0.00391769	0	0.00235801
ENSG00000262273	PNLIPRP1	0	0	0	0	0	0	0	0	0	0	0	0	0	0	0	0	0	0
ENSG00000105887	MTPN	80.0674	74.189	70.5963	75.0091	65.9359	91.9209	75.437	74.189	86.0796	75.0091	85.4491	91.9209	83.0894	74.189	95.2535	75.0091	99.7626	91.9209
ENSG00000262277	DIXDC1	0	0	0	0	0	0	0	0	0	0	0	0	0	0	0	0	0	0
ENSG00000105880	DLX5	0	0	0	0	0	0	0	0	0	0	0	0	0	0	0	0	0	0
ENSG00000262279	NCAM1	0	0	0	0	0	0	0	0	0	0	0	0	0	0	0	0	0	0
ENSG00000092969	TGFB2	0.35851	0.29704	1.03126	0.764114	0.85697	0.634052	0.260931	0.29704	1.51501	0.764114	1.13511	0.634052	0.381257	0.29704	1.60634	0.764114	1.13783	0.634052
ENSG00000105889	STEAP1B	0	0	0.0238091	0	0.0376676	0	0	0	0.0224635	0	0.0964815	0	0	0	0	0	0	0
ENSG00000150907	FOXO1	0.978368	0.939845	0.667409	1.00284	0.711597	1.49217	0.647627	0.939845	0.635657	1.00284	0.842765	1.49217	0.815068	0.939845	1.05992	1.00284	2.1219	1.49217
ENSG00000118564	FBXL5	20.3727	18.4997	5.60704	15.0287	6.73029	22.9095	19.3846	18.4997	6.04099	15.0287	7.92398	22.9095	21.7451	18.4997	18.9069	15.0287	21.1494	22.9095
ENSG00000110237	ARHGEF17	0.415464	0.374266	0.84976	0.807206	0.952953	0.638957	0.507245	0.374266	0.618116	0.807206	0.937001	0.638957	0.462617	0.374266	0.989242	0.807206	0.707969	0.638957
ENSG00000184351	KRTAP19-1	0	0.0657918	0	0	0	0	0.032009	0.0657918	0	0	0	0	0	0.0657918	0	0	0	0
ENSG00000184350	MRGPRE	0	0	0	0.0271207	0	0	0	0	0	0.0271207	0	0	0	0	0	0.0271207	0	0
ENSG00000102287	GABRE	0.0129265	0.013239	0.00763395	0	0.0108697	0.00477625	0.015029	0.013239	0.00180062	0	0.00773375	0.00477625	0.0143936	0.013239	0.00482656	0	0.00421145	0.00477625
ENSG00000138867	GUCD1	29.653	29.8518	38.8909	28.5456	37.5623	23.0968	30.8106	29.8518	35.8784	28.5456	34.7915	23.0968	28.8726	29.8518	24.9775	28.5456	24.9347	23.0968
ENSG00000163032	VSNL1	2.2357	1.44702	0.153452	0.707835	0.150214	0.588052	4.5639	1.44702	0.307655	0.707835	0.170032	0.588052	3.94815	1.44702	1.54625	0.707835	0.857134	0.588052
ENSG00000173261	PLAC8L1	0.18978	0.226761	0.112077	0.233007	0.026597	0.596037	0.252168	0.226761	0.0528713	0.233007	0	0.596037	0.316978	0.226761	0.283443	0.233007	0.340065	0.596037
ENSG00000134152	KATNBL1	3.22974	3.03457	1.91826	2.76759	1.9259	2.84079	2.89902	3.03457	2.32932	2.76759	2.61065	2.84079	3.86808	3.03457	3.64324	2.76759	2.82941	2.84079
ENSG00000134153	EMC7	43.4008	41.7415	41.219	46.8595	46.2623	38.5078	41.7052	41.7415	42.4299	46.8595	49.1191	38.5078	39.4784	41.7415	48.9479	46.8595	37.6463	38.5078
ENSG00000105771	SMG9	8.77385	7.9345	5.19821	7.57453	4.7222	6.75053	10.6944	7.9345	5.36977	7.57453	5.02804	6.75053	9.10121	7.9345	7.02142	7.57453	5.97778	6.75053
ENSG00000225998	LSM2	0	0	0	0	0	0	0	0	0	0	0	0	0	0	0	0	0	0
ENSG00000131508	UBE2D2	23.481	23.3144	23.2672	21.5895	25.3415	19.3859	22.5278	23.3144	24.2598	21.5895	25.3955	19.3859	23.4247	23.3144	20.7352	21.5895	18.9883	19.3859
ENSG00000014824	SLC30A9	6.84941	6.50611	5.03464	6.11939	5.19686	6.57689	6.05881	6.50611	5.8494	6.11939	6.45096	6.57689	7.78987	6.50611	8.37367	6.11939	7.59	6.57689
ENSG00000131504	DIAPH1	56.7275	60.5357	43.7179	89.0507	37.6641	87.0783	51.9031	60.5357	41.0439	89.0507	37.1657	87.0783	53.4176	60.5357	73.9335	89.0507	76.638	87.0783
ENSG00000162783	IER5	20.1108	19.7614	11.8453	17.6287	10.0734	20.1201	33.1817	19.7614	11.5834	17.6287	9.7561	20.1201	27.6559	19.7614	12.8329	17.6287	14.6382	20.1201
ENSG00000166200	COPS2	10.0554	10.5694	7.02855	9.48366	8.7556	9.18604	9.57709	10.5694	9.28874	9.48366	9.77788	9.18604	12.9739	10.5694	13.6066	9.48366	12.0327	9.18604
ENSG00000166206	GABRB3	0.00922907	0	0	0	0	0	0.00459864	0	0	0	0	0	0	0	0	0	0.00902045	0
ENSG00000131503	ANKHD1	10.5759	10.0412	8.75075	9.12724	7.86405	10.2492	10.0468	10.0412	9.30701	9.12724	9.73677	10.2492	11.6661	10.0412	10.2405	9.12724	10.4749	10.2492
ENSG00000152463	OLAH	0.0877719	0.116861	0.0777523	0	0.066425	0.0486464	0.139951	0.116861	0.0586863	0	0.12603	0.0486464	0.136827	0.116861	0.0196636	0	0	0.0486464
ENSG00000152464	RPP38	8.46097	8.23604	4.98087	7.07834	5.0354	6.73317	7.37116	8.23604	4.92399	7.07834	5.2486	6.73317	8.03259	8.23604	7.7073	7.07834	6.98774	6.73317
ENSG00000152465	NMT2	2.69109	2.35699	1.54444	1.62054	2.1318	2.25544	2.95164	2.35699	1.64572	1.62054	2.26043	2.25544	3.01935	2.35699	1.89321	1.62054	2.11302	2.25544
ENSG00000152467	ZSCAN1	0.00868534	0.00889524	0	0	0	0	0	0.00889524	0	0	0	0	0	0.00889524	0	0	0	0
ENSG00000260692	SURF1	0	0	0	0	0	0	0	0	0	0	0	0	0	0	0	0	0	0
ENSG00000260696	TAS2R38	0	0	0	0	0	0	0	0	0	0	0	0	0	0	0	0	0	0
ENSG00000181450	ZNF678	1.20266	1.227	0.365327	0.975907	0.528892	1.12114	1.14341	1.227	0.491023	0.975907	0.616149	1.12114	1.53156	1.227	1.20005	0.975907	0.995321	1.12114
ENSG00000021852	C8B	0.00760325	0	0	0.0070013	0	0	0.00757706	0	0	0.0070013	0	0	0	0	0	0.0070013	0	0
ENSG00000163785	RYK	5.85455	5.04412	2.11359	4.20048	2.01067	4.65641	5.01163	5.04412	2.61255	4.20048	2.57925	4.65641	5.78761	5.04412	5.32782	4.20048	5.48875	4.65641
ENSG00000163781	TOPBP1	12.8668	12.0394	4.11907	11.8686	4.42953	8.56102	12.0417	12.0394	4.75668	11.8686	5.67345	8.56102	15.3307	12.0394	11.6051	11.8686	7.77279	8.56102
ENSG00000163788	SNRK	8.51549	8.73956	3.19904	7.54573	3.86142	9.75549	7.98262	8.73956	3.92494	7.54573	4.68391	9.75549	9.71362	8.73956	6.47229	7.54573	8.76456	9.75549
ENSG00000182195	LDOC1	0.0301369	0	0	0	0	0	0	0	0	0	0	0	0	0	0	0	0	0
ENSG00000182197	EXT1	3.21022	3.19335	1.13264	2.35934	1.48383	1.07472	2.86881	3.19335	1.08529	2.35934	1.57243	1.07472	3.00285	3.19335	3.70202	2.35934	1.26188	1.07472
ENSG00000182196	ARL6IP4	33.825	40.091	47.6891	44.6049	48.4412	36.8978	36.6571	40.091	39.0612	44.6049	44.5642	36.8978	32.281	40.091	40.651	44.6049	31.6217	36.8978
ENSG00000188130	MAPK12	3.35213	3.71736	4.2669	5.00733	4.5485	4.63614	3.23084	3.71736	3.6852	5.00733	3.96888	4.63614	3.08268	3.71736	4.21377	5.00733	3.6789	4.63614
ENSG00000188133	TMEM215	0.150651	0.160226	0.354165	0.176073	0.185147	0.404636	0.138583	0.160226	0.455216	0.176073	0.197597	0.404636	0.135489	0.160226	0.272599	0.176073	0.260511	0.404636
ENSG00000182199	SHMT2	37.9817	40.4897	24.6304	46.8107	21.2668	82.6299	35.2138	40.4897	21.6396	46.8107	18.39	82.6299	34.513	40.4897	43.7799	46.8107	63.9091	82.6299
ENSG00000135119	RNFT2	0.057337	0.0621771	0.0418285	0.0745379	0.0283609	0.119636	0.0336115	0.0621771	0.0281889	0.0745379	0.0272413	0.119636	0.0450667	0.0621771	0.0528921	0.0745379	0.16153	0.119636
ENSG00000186867	QRFPR	0.0192123	0	0.0255287	0.0176913	0.0161552	0	0	0	0.0321144	0.0176913	0.0603456	0	0.0213928	0	0.0430413	0.0176913	0	0
ENSG00000186866	POFUT2	6.91762	6.80863	6.08654	4.89003	6.70272	6.69157	7.49575	6.80863	5.83869	4.89003	5.95638	6.69157	6.30551	6.80863	4.3456	4.89003	6.39929	6.69157
ENSG00000186860	KRTAP17-1	0	0	0	0	0	0	0	0	0	0	0	0	0	0	0	0	0	0
ENSG00000186862	PDZD7	2.79021	2.7696	0.834474	4.0601	1.05415	5.52271	2.55215	2.7696	0.751388	4.0601	0.694307	5.52271	2.56846	2.7696	4.56983	4.0601	5.12169	5.52271
ENSG00000186868	MAPT	0.0375389	0.0626529	0.0344852	0.0422485	0.0549476	0.0739749	0.0415662	0.0626529	0.0418322	0.0422485	0.0798539	0.0739749	0.0356068	0.0626529	0.045164	0.0422485	0.0665861	0.0739749
ENSG00000015153	YAF2	0.951327	0.988042	0.584993	0.835471	0.738788	1.00148	0.938513	0.988042	0.868689	0.835471	0.896691	1.00148	1.22341	0.988042	0.943415	0.835471	0.997173	1.00148
ENSG00000266592	AKR1C1	0	0	0	0	0	0	0	0	0	0	0	0	0	0	0	0	0	0
ENSG00000139737	SLAIN1	1.49716	1.44903	0.715537	1.43074	0.999356	1.65386	1.13823	1.44903	0.864294	1.43074	1.02501	1.65386	1.04837	1.44903	1.45805	1.43074	1.25714	1.65386
ENSG00000214960	ISPD	0.360993	0.36168	0.166844	0.122849	0.151776	0.16528	0.203337	0.36168	0.177091	0.122849	0.26058	0.16528	0.183505	0.36168	0.140649	0.122849	0.0767028	0.16528
ENSG00000139734	DIAPH3	1.649	1.28368	0.40613	2.98583	0.360642	2.0164	1.45172	1.28368	0.546952	2.98583	0.391531	2.0164	1.90614	1.28368	2.44351	2.98583	1.55029	2.0164
ENSG00000214967	NPIPA7	12.5037	12.473	5.30783	9.76779	4.58285	16.7426	12.5579	12.473	4.89011	9.76779	5.11468	16.7426	12.3906	12.473	9.05419	9.76779	14.0002	16.7426
ENSG00000005302	MSL3	6.93666	6.8327	9.68281	7.4555	7.39926	9.41039	6.46062	6.8327	10.5001	7.4555	8.65096	9.41039	7.0266	6.8327	9.63479	7.4555	10.1214	9.41039
ENSG00000074201	CLNS1A	10.5689	10.2135	4.68322	11.4132	5.09902	10.3781	9.15911	10.2135	5.28335	11.4132	5.10535	10.3781	10.5357	10.2135	11.6465	11.4132	10.0474	10.3781
ENSG00000101255	TRIB3	18.2084	20.3713	9.30878	29.9626	7.75911	76.9736	18.2228	20.3713	6.78259	29.9626	6.73335	76.9736	17.2184	20.3713	27.1765	29.9626	66.805	76.9736
ENSG00000101251	SEL1L2	0	0.00547135	0.0047324	0	0	0	0	0.00547135	0	0	0.00479427	0	0	0.00547135	0	0	0	0
ENSG00000119383	PPP2R4	17.3596	19.4915	23.0575	26.7078	28.3085	21.9487	16.0641	19.4915	20.2013	26.7078	23.7908	21.9487	14.8239	19.4915	21.8258	26.7078	21.245	21.9487
ENSG00000153339	TRAPPC8	5.83285	5.61184	5.00946	4.89635	5.19813	5.21287	5.22722	5.61184	5.22304	4.89635	6.69319	5.21287	6.33191	5.61184	6.69506	4.89635	6.35228	5.21287
ENSG00000187118	CMC1	5.43349	5.32075	3.49958	5.20824	3.92804	6.29357	5.00459	5.32075	3.96182	5.20824	4.36539	6.29357	5.91858	5.32075	6.13045	5.20824	6.05365	6.29357
ENSG00000180329	CCDC43	9.99308	9.17764	8.07975	9.67709	8.09741	8.56358	8.87226	9.17764	9.00194	9.67709	9.78985	8.56358	9.8648	9.17764	11.5927	9.67709	9.21312	8.56358
ENSG00000127914	AKAP9	1.34927	1.22288	0.681551	1.2004	0.922439	1.20334	1.03975	1.22288	0.990305	1.2004	1.14018	1.20334	1.9066	1.22288	1.79781	1.2004	1.71819	1.20334
ENSG00000223874	AC007557.1	0.0527971	0	0	0	0	0	0	0	0	0	0	0	0	0	0	0	0	0
ENSG00000112474	HSD17B8	0	0	0	0	0	0	0	0	0	0	0	0	0	0	0	0	0	0
ENSG00000196345	ZKSCAN7	0.0358806	0.0419975	0.013622	0.00944	0.047412	0.0681819	0.0306489	0.0419975	0.0385563	0.00944	0.0690005	0.0681819	0.0456604	0.0419975	0.0344501	0.00944	0.0701391	0.0681819
ENSG00000196344	ADH7	0	0	0	0	0	0	0	0	0	0	0	0	0	0	0	0	0	0
ENSG00000196341	OR8D1	0	0	0	0	0	0	0.0403076	0	0	0	0	0	0	0	0	0	0	0
ENSG00000257774	AC139677.5	0	0	0	0	0	0	0	0	0	0	0	0	0	0	0	0	0	0
ENSG00000257770	GPX5	0	0	0	0	0	0	0	0	0	0	0	0	0	0	0	0	0	0
ENSG00000213533	TMEM110	12.2902	12.0606	8.58725	10.1135	8.58679	9.48099	11.1869	12.0606	8.49536	10.1135	8.06582	9.48099	10.5562	12.0606	10.4935	10.1135	9.35438	9.48099
ENSG00000112406	HECA	32.0146	29.5633	40.258	34.9799	47.9421	37.9619	31.606	29.5633	47.052	34.9799	63.7835	37.9619	34.9114	29.5633	56.7479	34.9799	51.0112	37.9619
ENSG00000258713	C20orf141	0.0550378	0	0	0	0.0462802	0	0	0	0	0	0	0	0.0306422	0	0	0	0	0
ENSG00000150627	WDR17	0	0.00815558	0	0	0	0	0.00529047	0.00815558	0.00443694	0	0	0	0	0.00815558	0	0	0.0103775	0
ENSG00000183748	MRC1L1	0.0236639	0.0646287	0.0174688	0.0798982	0.0431133	0.135526	0.0235824	0.0646287	0.00988887	0.0798982	0.0141577	0.135526	0.101007	0.0646287	0.0751035	0.0798982	0.0886609	0.135526
ENSG00000006659	LGALS14	0.0192301	0	0	0.0177077	0	0	0	0	0	0.0177077	0	0	0	0	0	0.0177077	0	0
ENSG00000183742	MACC1	0.0209631	0.00214697	0.0278551	0.00386069	0.0299666	0.0139422	0.0271582	0.00214697	0.0420492	0.00386069	0.0244567	0.0139422	0.030345	0.00214697	0.0211337	0.00386069	0.0122935	0.0139422
ENSG00000183741	CBX6	9.52451	9.72823	7.09131	12.5632	7.18112	13.7771	8.18099	9.72823	6.17221	12.5632	6.94053	13.7771	7.54986	9.72823	12.8252	12.5632	14.4967	13.7771
ENSG00000183747	ACSM2A	0.00253194	0	0	0.00466298	0	0	0.00504644	0	0	0.00466298	0	0	0	0	0	0.00466298	0	0
ENSG00000155275	TRMT44	1.38078	1.43066	0.920936	1.36051	0.971321	1.25065	1.33587	1.43066	0.981145	1.36051	0.988424	1.25065	1.44476	1.43066	1.27887	1.36051	1.01086	1.25065
ENSG00000159556	ISL2	2.32623	3.05222	1.48138	3.95723	1.3669	5.04323	2.44856	3.05222	1.14779	3.95723	1.13184	5.04323	2.18455	3.05222	3.55803	3.95723	4.31902	5.04323
ENSG00000107593	PKD2L1	0.0810254	0.193629	0.00598133	0.0186527	0.0170332	0.142206	0.0605598	0.193629	0	0.0186527	0.0484762	0.142206	0.0902214	0.193629	0.0605072	0.0186527	0.138589	0.142206
ENSG00000164172	MOCS2	1.81599	1.72198	2.48032	1.78349	2.49376	1.64942	1.83038	1.72198	2.93743	1.78349	2.91243	1.64942	1.86064	1.72198	2.24689	1.78349	1.56573	1.64942
ENSG00000164171	ITGA2	0.199361	0.169254	5.39336	0.280197	4.62329	0.587358	0.0888806	0.169254	5.80544	0.280197	6.23366	0.587358	0.128519	0.169254	0.508334	0.280197	1.02298	0.587358
ENSG00000198610	AKR1C4	0.0867263	0.0888223	0	0.0299476	0.0182316	0.108151	0.118838	0.0888223	0	0.0299476	0	0.108151	0.132783	0.0888223	0.0607166	0.0299476	0.0953615	0.108151
ENSG00000164175	SLC45A2	0.044431	0.0260027	0.00562271	0.0233791	0	0.0140716	0.0126508	0.0260027	0.0106098	0.0233791	0.0170887	0.0140716	0	0.0260027	0.00710992	0.0233791	0.0124076	0.0140716
ENSG00000198612	COPS8	9.48	8.41427	9.08375	7.20675	9.46138	5.92094	7.6817	8.41427	9.95608	7.20675	10.6394	5.92094	9.21634	8.41427	8.91862	7.20675	6.78145	5.92094
ENSG00000168843	FSTL5	0.00387475	0	0	0.0142719	0	0.00429506	0.0038614	0	0	0.0142719	0	0.00429506	0	0	0	0.0142719	0	0.00429506
ENSG00000100612	DHRS7	12.6808	11.8489	18.5561	12.9181	15.6534	17.4908	11.2111	11.8489	19.0557	12.9181	17.5317	17.4908	11.6375	11.8489	12.0863	12.9181	19.4935	17.4908
ENSG00000197437	OR13G1	0	0	0	0.0365326	0	0	0.0593054	0	0	0.0365326	0	0	0	0	0.0444404	0.0365326	0	0
ENSG00000197430	OPALIN	0	0	0	0	0	0	0	0	0	0	0	0	0	0	0	0	0.010753	0
ENSG00000120149	MSX2	0.447892	0.383824	0.340082	0.36193	0.407368	0.37489	0.510113	0.383824	0.275024	0.36193	0.262498	0.37489	0.376588	0.383824	0.37884	0.36193	0.268021	0.37489
ENSG00000161526	SAP30BP	7.20001	7.19924	7.78976	6.8033	7.55473	6.01706	7.13519	7.19924	7.61168	6.8033	7.51098	6.01706	6.51377	7.19924	6.5246	6.8033	5.74459	6.01706
ENSG00000230031	POTEB2	0	0.0251935	0	0.0226515	0	0.0409011	0.0122571	0.0251935	0	0.0226515	0.0220758	0.0409011	0	0.0251935	0	0.0226515	0.0961718	0.0409011
ENSG00000230034	PSMB8	0	0	0	0	0	0	0	0	0	0	0	0	0	0	0	0	0	0
ENSG00000160691	SHC1	27.903	28.4942	36.5242	29.0779	36.7517	28.3448	27.6831	28.4942	34.8234	29.0779	33.588	28.3448	26.3234	28.4942	24.0613	29.0779	27.8748	28.3448
ENSG00000160695	VPS11	9.26445	9.13573	11.2506	12.6978	12.3221	12.7423	10.1148	9.13573	10.1214	12.6978	11.199	12.7423	8.36382	9.13573	12.6522	12.6978	12.6468	12.7423
ENSG00000254959	INMT-FAM188B	0.252161	0.309907	0.70842	0.444493	0.799683	0.439237	0.229753	0.309907	0.855047	0.444493	0.782338	0.439237	0.28078	0.309907	0.355091	0.444493	0.32392	0.439237
ENSG00000124391	IL17C	0.0300932	0.0308205	0	0.0138554	0.101219	0.0667151	0.0899687	0.0308205	0	0.0138554	0	0.0667151	0	0.0308205	0	0.0138554	0.0294129	0.0667151
ENSG00000243667	WDR92	3.09281	2.96958	1.56364	3.15242	1.989	2.30057	2.75772	2.96958	1.8579	3.15242	2.16384	2.30057	3.036	2.96958	2.50144	3.15242	1.944	2.30057
ENSG00000243660	ZNF487	0.119462	0.1561	0.317474	0.208628	0.287503	0.187215	0.147787	0.1561	0.302973	0.208628	0.199629	0.187215	0.151368	0.1561	0.20303	0.208628	0.213391	0.187215
ENSG00000204580	DDR1	0.111457	0.0838661	0.846291	0.0544585	0.65223	0.0630345	0.124674	0.0838661	0.849789	0.0544585	0.730793	0.0630345	0.106378	0.0838661	0.0152876	0.0544585	0.0911521	0.0630345
ENSG00000178718	RPP25	17.51	20.261	6.81814	13.9054	10.535	11.6999	15.5168	20.261	5.82989	13.9054	8.16536	11.6999	14.8673	20.261	10.4434	13.9054	9.27875	11.6999
ENSG00000178719	GRINA	117.836	114.327	160.894	85.0911	168.842	109.039	143.705	114.327	142.529	85.0911	136.463	109.039	117.112	114.327	94.2477	85.0911	108.431	109.039
ENSG00000007216	SLC13A2	0	0	0	0.00592268	0	0	0	0	0	0.00592268	0	0	0	0	0	0.00592268	0	0
ENSG00000151229	SLC2A13	3.07711	2.73608	2.53886	1.98173	2.50743	2.39244	2.63757	2.73608	3.18749	1.98173	3.71602	2.39244	3.21896	2.73608	2.87429	1.98173	3.10059	2.39244
ENSG00000151224	MAT1A	0.0281155	0	0	0.0155338	0	0	0.00560374	0	0	0.0155338	0	0	0	0	0	0.0155338	0.00549599	0
ENSG00000177479	ARIH2	8.99644	8.76324	7.24954	8.17218	6.5551	7.52514	9.47614	8.76324	7.2508	8.17218	6.51744	7.52514	8.5823	8.76324	9.78166	8.17218	7.30311	7.52514
ENSG00000177476	OR2G3	0	0	0	0	0	0	0	0	0	0	0	0	0	0	0	0	0	0
ENSG00000129951	LPPR3	29.7911	35.3733	0.428723	42.6555	0.322985	19.8919	29.8645	35.3733	0.391651	42.6555	0.317128	19.8919	29.2031	35.3733	13.4067	42.6555	7.44084	19.8919
ENSG00000124535	WRNIP1	9.29623	8.8193	6.38605	8.07729	6.86294	7.78928	9.23221	8.8193	6.18167	8.07729	6.98345	7.78928	9.14752	8.8193	8.48881	8.07729	6.14108	7.78928
ENSG00000124532	MRS2	5.12651	5.09529	2.82967	3.93035	2.53938	3.77483	4.72923	5.09529	2.75413	3.93035	2.82135	3.77483	5.47836	5.09529	4.72455	3.93035	4.11795	3.77483
ENSG00000205981	DNAJC19	2.91624	3.34821	1.96826	2.65339	2.27705	2.58478	2.71591	3.34821	1.85701	2.65339	2.94944	2.58478	2.9895	3.34821	2.96848	2.65339	2.8899	2.58478
ENSG00000263007	CRYAB	0	0	0	0	0	0	0	0	0	0	0	0	0	0	0	0	0	0
ENSG00000129480	DTD2	4.06465	3.53344	1.20022	1.72994	1.29785	1.26961	3.60522	3.53344	1.50011	1.72994	1.47915	1.26961	3.87273	3.53344	2.33127	1.72994	1.29013	1.26961
ENSG00000129484	PARP2	3.0901	2.70304	1.22059	2.89677	1.47811	1.97095	2.41813	2.70304	1.4014	2.89677	1.62297	1.97095	3.11929	2.70304	2.78045	2.89677	2.07456	1.97095
ENSG00000084207	GSTP1	95.5652	102.335	78.6405	133.547	102.637	94.5928	111.875	102.335	74.7003	133.547	83.1896	94.5928	96.3294	102.335	112.215	133.547	81.7319	94.5928
ENSG00000205670	SMIM11	2.61342	2.55515	1.09409	2.22455	1.94416	2.42596	2.48626	2.55515	1.59792	2.22455	1.9951	2.42596	2.98154	2.55515	2.06414	2.22455	2.15357	2.42596
ENSG00000179044	EXOC3L1	0.0472034	0.151939	0.191154	0.0993516	0.249495	0.0597986	0.134402	0.151939	0.129627	0.0993516	0.114981	0.0597986	0.0675781	0.151939	0.0830892	0.0993516	0.0329545	0.0597986
ENSG00000179046	TRIML2	0.0340152	0.0418047	0.0241058	0.0187933	0.0400437	0.045246	0.101694	0.0418047	0.0284292	0.0187933	0.0732627	0.045246	0.053026	0.0418047	0.0304817	0.0187933	0.0598433	0.045246
ENSG00000205678	TECRL	0	0	0	0	0	0	0.00686628	0	0	0	0	0	0	0	0	0	0	0
ENSG00000255384	RP11-770J1.4	0	0	0	0.0457971	0	0.0441036	0	0	0.0166268	0.0457971	0.0178532	0.0441036	0	0	0	0.0457971	0.0972206	0.0441036
ENSG00000028277	POU2F2	14.3955	8.98601	28.1276	10.4926	20.4964	11.3721	37.8911	8.98601	33.2629	10.4926	22.3351	11.3721	31.0799	8.98601	19.053	10.4926	13.963	11.3721
[truncated: 20,813 more rows]
