# Supplementary material
Source: publisher figshare collection journal article supplement (https://tandf.figshare.com/articles/dataset/_/7936865)
Supplement: Supplementary file 1 [file 1 › temi_a_12040023_sm0022.xlsx]

## Sheet: Sheet1
Supplementary Table S15. M. shigaense homologous genes of M. tuberculosis virulent genes
category	M. tuberculosis gene	M. shigaense gene	Blast identity	M. shigaense coverage
ESX-1	esxB	na	na	na
	esxA	na	na	na
ESX-2	esxD	na	na	na
	esxC	na	na	na
ESX-3	esxG	na	na	na
	esxH	na	na	na
ESX-4	esxU	na	na	na
	esxT	na	na	na
ESX-5	esxM	na	na	na
	esxN	M. shigaense_orf03755	88.1	100
		M. shigaense_orf05863	87.6	99.3
PE/PPE	PPE38	M. shigaense _orf04929	72.7	34
	PPE45	M. shigaense _orf03746	78.4	38.2
	PPE51	M. shigaense _orf02350	82.8	6.9
	PPE11	M. shigaense _orf00702	75.1	35.6
	PPE46	M. shigaense _orf00698	75.2	29.3
	PPE65	M. shigaense _orf03767	71.7	26.8
	PPE48	M. shigaense _orf00698	75.9	14.4
PDIM	ppsE	M. shigaense _orf02400	75.2	66.9
	ppsA	M. shigaense _orf02411	81.1	60.6
PGLs	fadD26	na	na	na
	fadD28	na	na	na
Note. Four colors denote different functional groups of M. tuberculosis genes. ESX-1 to ESX-5 belong to type VII secretion systems. PE/PPE denote two protein families with a conserved PE and PPE motif at the N-terminal domain. PDIM and PGLs are cell wall liplids unique to pathogenic mycobacteria.
