# Supplementary material
Source: publisher figshare collection journal article supplement (https://tandf.figshare.com/articles/dataset/_/7936865)
Supplement: Supplementary file [file 1]

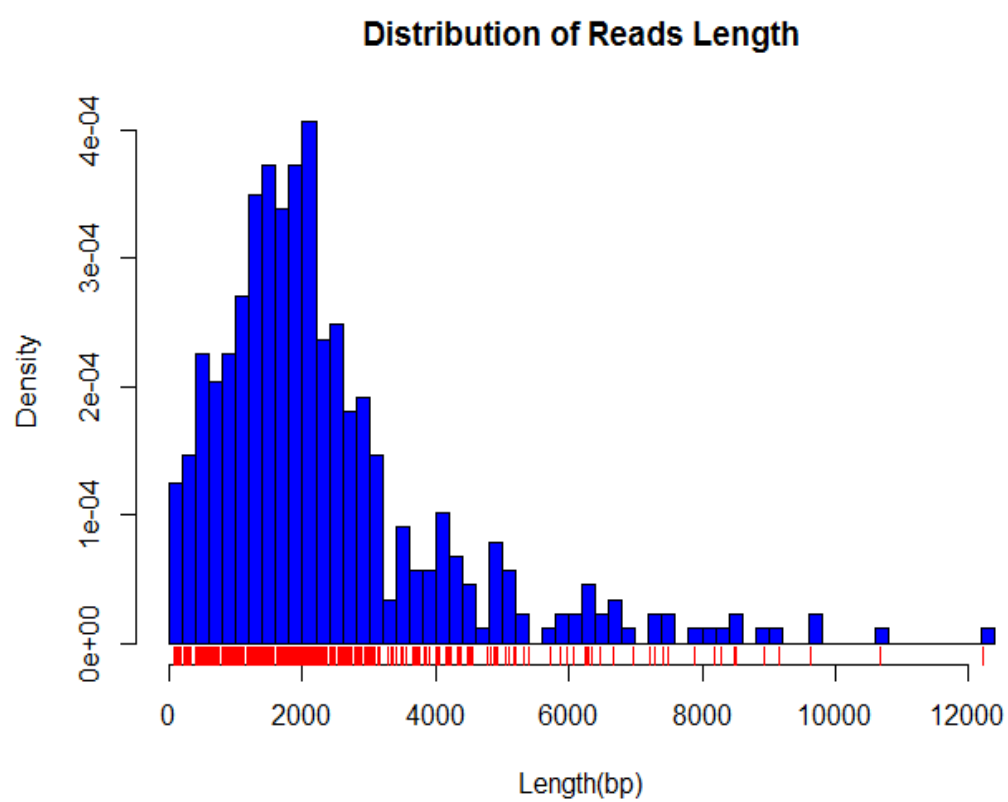

**Supplementary Figure S1.** Length distribution of PacBio raw reads
