# Supplementary material
Source: publisher figshare collection journal article supplement (https://tandf.figshare.com/articles/dataset/_/7936865)

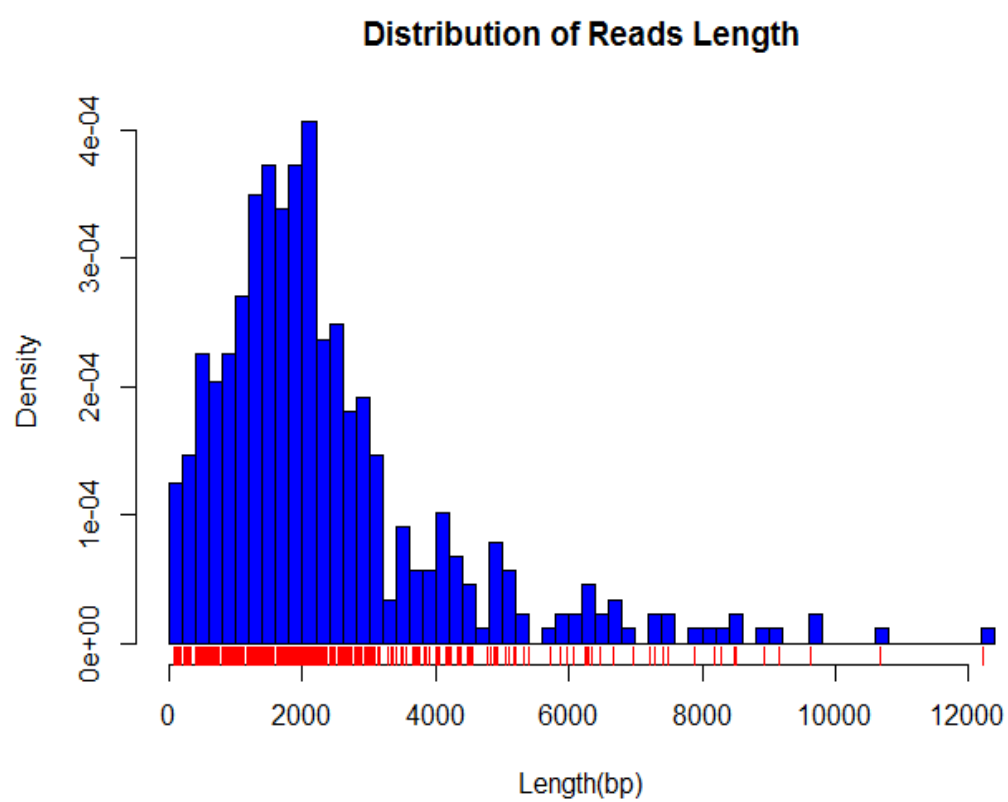

**Supplementary Figure S1.** Length distribution of PacBio raw reads

Supplement: Supplementary file 1 [file 1 › temi_a_12040023_sm0001.pdf]
